# Supplementary material for: Enhanced insulin signalling ameliorates C9orf72 hexanucleotide repeat expansion toxicity in Drosophila
Source: eLife journal article supplement (doi:10.7554/elife.58565), 2021-03-19
Supplement: supp [file elife-58565-supp-v1.zip]

Archive with 29 entries (29 files):
- elife_poa_e58565_Figure_1_figure_supplement_1.pdf
- elife_poa_e58565_Figure_1_figure_supplement_2.pdf
- elife_poa_e58565_Figure_1_figure_supplement_3.pdf
- elife_poa_e58565_Figure_1_figure_supplement_4.pdf
- elife_poa_e58565_Figure_2_figure_supplement_1.pdf
- elife_poa_e58565_Figure_6_figure_supplement_1.pdf
- elife_poa_e58565_Figure_1_source_data_1.xlsx
- elife_poa_e58565_Figure_1_source_data_2.xlsx
- elife_poa_e58565_Figure_1_figure_supplement_2_source_data_1.xlsx
- elife_poa_e58565_Figure_1_figure_supplement_3_source_data_1.xlsx
- elife_poa_e58565_Figure_1_figure_supplement_4_source_data_1.xlsx
- elife_poa_e58565_Figure_2_source_data_1.xls
- elife_poa_e58565_Figure_2_source_data_2.xls
- elife_poa_e58565_Figure_2_source_data_3.xlsx
- elife_poa_e58565_Figure_2_source_data_4.xlsx
- elife_poa_e58565_Figure_2_figure_supplement_1_source_data_1.xlsx
- elife_poa_e58565_Figure_2_figure_supplement_1_source_data_2.xlsx
- elife_poa_e58565_Figure_2_figure_supplement_1_source_data_3.xlsx
- elife_poa_e58565_Figure_2_figure_supplement_1_source_data_4.xlsx
- elife_poa_e58565_Figure_3_source_data_1.xlsx
- elife_poa_e58565_Figure_3_source_data_2.xlsx
- elife_poa_e58565_Figure_4_source_data_1.xlsx
- elife_poa_e58565_Figure_4_source_data_2.xlsx
- elife_poa_e58565_Figure_4_source_data_3.xls
- elife_poa_e58565_Figure_5_source_data_1.xlsx
- elife_poa_e58565_Figure_6_source_data_1.xls
- elife_poa_e58565_Figure_6_figure_supplement_1_source_data_1.xls
- elife_poa_e58565_Figure_6_figure_supplement_1_source_data_2.xls
- elife_poa_e58565_Transparent_Reporting_File.docx
