# Supplementary material for: Enhanced insulin signalling ameliorates C9orf72 hexanucleotide repeat expansion toxicity in Drosophila
Source: eLife journal article supplement (doi:10.7554/elife.58565), 2021-03-19
Supplement: supp [file elife-58565-supp-v1.zip › elife_poa_e58565_Figure_1_figure_supplement_2_source_data_1.xlsx]

## Sheet: Sheet1
Figure 1 -Figure supplement 2- source data
Delta CT method
Sample	CT dilp2	CT tub	DCT	2^-DCT	CT dilp3	CT tub	DCT	2^-DCT	CT dilp5	CT tub	DCT	2^-DCT
ELAVGS>(G4C2)36 Ru- 1	22.121	21.489	0.632	0.645281	25.14	20.715	4.425	0.0465524	24.877	20.586	4.291	0.0510835
ELAVGS>(G4C2)36 Ru- 2	22.193	21.2	0.993	0.502432	25.09	20.35	4.74	0.0374212	24.937	20.303	4.634	0.0402742
ELAVGS>(G4C2)36 Ru- 3	33.122	32.709	0.413	0.75106	36.678	32.2	4.478	0.0448733	37.5	32.869	4.631	0.040358
ELAVGS>(G4C2)36 Ru+ 4	22.587	20.867	1.72	0.303549	25.372	20.343	5.029	0.0306281	24.986	20.045	4.941	0.0325545
ELAVGS>(G4C2)36 Ru+ 5	23.348	21.171	2.177	0.221135	26.024	20.666	5.358	0.0243827	25.713	20.231	5.482	0.0223745
ELAVGS>(G4C2)36 Ru+ 6	22.987	21.133	1.854	0.276624	25.628	20.589	5.039	0.0304165	24.955	20.16	4.795	0.0360214
	Table Analyzed	dilp2 in (G4C2)36			Table Analyzed	dilp 3 in (G4C2)36			Table Analyzed	dilp 5 in (G4C2)36
	Column B	Induced			Column B	Induced			Column B	Induced
	vs.	vs.			vs.	vs.			vs.	vs.
	Column A	Uninduced			Column A	Uninduced			Column A	Uninduced
	Unpaired t test				Unpaired t test				Unpaired t test
	P value	0.0083			P value	0.0176			P value	0.062
	P value summary	**			P value summary	*			P value summary	ns
	Significantly different? (P < 0.05)	Yes			Significantly different? (P < 0.05)	Yes			Significantly different? (P < 0.05)	No
	One- or two-tailed P value?	Two-tailed			One- or two-tailed P value?	Two-tailed			One- or two-tailed P value?	Two-tailed
	t, df	t=4.849 df=4			t, df	t=3.893 df=4			t, df	t=2.570 df=4
	How big is the difference?				How big is the difference?				How big is the difference?
	Mean ± SEM of column A	0.6333 ± 0.07265 N=3			Mean ± SEM of column A	0.04267 ± 0.002963 N=3			Mean ± SEM of column A	0.0440 ± 0.003512 N=3
	Mean ± SEM of column B	0.2633 ± 0.02333 N=3			Mean ± SEM of column B	0.02833 ± 0.002186 N=3			Mean ± SEM of column B	0.0300 ± 0.004163 N=3
	Difference between means	-0.3700 ± 0.07630			Difference between means	-0.01433 ± 0.003682			Difference between means	-0.0140 ± 0.005447
	95% confidence interval	-0.5819 to -0.1581			95% confidence interval	-0.02456 to -0.004111			95% confidence interval	-0.02912 to 0.001123
	R squared	0.8546			R squared	0.7912			R squared	0.6229
	F test to compare variances				F test to compare variances				F test to compare variances
	F,DFn, Dfd	9.694, 2, 2			F,DFn, Dfd	1.837, 2, 2			F,DFn, Dfd	1.405, 2, 2
	P value	0.187			P value	0.7049			P value	0.8315
	P value summary	ns			P value summary	ns			P value summary	ns
	Significantly different? (P < 0.05)	No			Significantly different? (P < 0.05)	No			Significantly different? (P < 0.05)	No
	Mean	0.6333	0.2633		Mean	0.04267	0.02833		Mean	0.044	0.03
	Std. Deviation	0.1258	0.04041		Std. Deviation	0.005132	0.003786		Std. Deviation	0.006083	0.007211
	Std. Error of Mean	0.07265	0.02333		Std. Error of Mean	0.002963	0.002186		Std. Error of Mean	0.003512	0.004163
	Lower 95% CI of mean	0.3208	0.1629		Lower 95% CI of mean	0.02992	0.01893		Lower 95% CI of mean	0.02889	0.01209
	Upper 95% CI of mean	0.9459	0.3637		Upper 95% CI of mean	0.05541	0.03774		Upper 95% CI of mean	0.05911	0.04791
