# Supplementary material for: Enhanced insulin signalling ameliorates C9orf72 hexanucleotide repeat expansion toxicity in Drosophila
Source: eLife journal article supplement (doi:10.7554/elife.58565), 2021-03-19
Supplement: supp [file elife-58565-supp-v1.zip › elife_poa_e58565_Figure_1_figure_supplement_3_source_data_1.xlsx]

## Sheet: dilp 2 intensity GR100 Ru- 
	Cell	Area	Mean Int	Min	Max	Integr Int	Raw int Inten	Mean intensity-Mean Back		Cell	Area	Mean Int	Min	Max	Integr Int	Raw int Inten		meam -BKG mean	normalization			Cell	Area	Mean Int	Min	Max	Integr Int	Raw int Inten		mean -BKG mean
	1	91.529	6619.91	2013	10087	605915	24804793	5864.47	0.872596	1	69.667	4751.79	1417	6246	261375	10700096		4608.08	0.685653			1	67.981	11526.5	5909	14595	783583	32078119		10682.9	1.58954
	2	54.033	4690.58	1987	6813	253447	10375572	3935.14	0.585525	2	109.044	4033.69	2144	6850	439848	18006384		3889.98	0.578804			2	68.128	6960.17	2092	10813	474181	19411908		6490.53	0.965751
	3	79.169	7692.33	2679	10397	608994	24930839	6936.89	1.03217	3	89.648	6136.05	2872	12387	550087	22519316		5992.34	0.891623			3	48.268	7281.67	3873	10382	351475	14388584		6624.19	0.985639
	4	89.209	7199.51	3627	10183	642258	26292600	6444.07	0.958837	4	131.517	4393.4	1873	7919	577805	23654039		4249.69	0.632327			4	50.809	10229	5539	16657	519726	21276410		9259.23	1.37772
	5	54.766	8531.77	3789	13463	467252	19128240	7776.33	1.15707	5	90.87	4639.6	1862	8180	421598	17259296		4495.89	0.66896			5	56.598	9952.41	4346	13680	563288	23059741		9113.6	1.35605
	6	58.87	5403.98	1713	11602	318132	13023603	4648.54	0.691674	6	177.587	9191.55	2988	16145	1.6323e+06	66822540		9047.84	1.34626			6	46.925	7433	1813	11015	348793	14278796		6626.9	0.986041
	7	64.928	14861.7	3149	20328	964939	39502459	14106.3	2.09893	7	238.142	6487.53	1609	11930	1.54495e+06	63246904		6343.82	0.94392			7	59.969	7269.35	3022	10813	435936	17846255		6615.72	0.984377
	8	47.902	6615.24	2352	8640	316883	12972482	5859.8	0.871901	8	144.317	6644.22	1855	10778	958871	39254024		6500.51	0.967234
	9	40.549	5939.87	3705	10439	240858	9860177	5184.43	0.77141
								6720.71		BKG 1	143.12	697.558	478	1049	99834.3	4086993	143.719					BKG 1	67.981	843.589	530	1330	57348.2	2347709
	BKG1	91.529	759.855	479	1161	69548.9	2847176			BKG 2	144.317	427.115	220	944	61639.9	2523398						BKG 2	68.128	469.633	349	688	31995.1	1309807
	BKG2	70.424	821.104	544	1133	57825.4	2367243	755.441														BKG 3	48.268	657.477	442	996	31735.3	1299174
	BKG3	62.265	685.364	721	1582	61353.9	2511692															BKG 4	50.809	969.81	685	1443	49274.9	2017204
																	image 72 quantification projection sum.jpg					BKG 5	56.598	838.818	518	1243	47475.5	1943541
image 74 quantification projection sum.jpg																						BKG 6	46.925	806.102	476	1467	37826.2	1548521
																						BKG 7	59.969	653.632	384	1226	39197.7	1604666

## Sheet: GR100 Ru+
	Cell	Area	Mean Int	Min	Max	Integr Int	Raw int Inten		Mean intensity - Mean inten Back		Normalized		Cell	Area	Mean Int	Min	Max	Integr Int	Raw int Inten		Nmalized or		Cell	Area	Mean Int	Min	Max	Integr Int	Raw int Inten	Mean intensity -Back	Nmalized or
	1	121.233	2487.18	511	4714	301528	12343897	2267.24			0.337351		1	62.778	5849.88	4490	10290	430023	17604198	5637.84	0.838875		1	72.671	2831.33	1558	4071	205757	8423220	2159.7	0.32135
	2	89.135	1405.39	621	2245	125270	5128265	1165.52			0.173423		2	77.996	6653.19	3554	10046	518925	21243648	6448.55	0.959504		2	60.726	3295	2013	4792	200093	8191367	2885.22	0.429303
	3	97.196	2871.27	1097	5278	279077	11424788	2689.48			0.400178		3	85.203	4376.11	1945	7730	372856	15263881	2900.58	0.431588		3	57.942	3582.04	2263	4921	207549	8496609	2825.32	0.42039
	4	95.682	1295.81	649	2021	123986	5075692	1019.82		2931.64	0.151744		4	72.109	6777.79	3574	10290	488743	20008035	6557.6	0.975729		4	70.79	8494.88	3110	12479	601356	24618175	7292.74	1.08511
	5	92.238	3861.09	1784	5943	356138	14579495	3665.28			0.54537		5	61.288	4284.97	1857	6415	262618	10750999	4080.69	0.607181		5	98.173	4765.19	2202	7461	467815	19151315	3319.29	0.49389
	6	85.911	5317.62	3036	7126	456841	18702068	5193.92			0.772822		6	101.813	11379.6	3018	19028	1.15859e+06	47430169	9107.39	1.35512		6	116.005	3657.86	1869	6606	424332	17371201	2264.53	0.336948
	7	58.039	3923.4	871	6524	227711	9321989	3818.01			0.568096		7	55.719	5271.28	2911	9091	293709	12023790	5062.34	0.753244		7	75.7	9564.25	5027	12479	724017	29639626	7679.58	1.14267
	8	74.357	3699.22	1197	5173	275062	11260430	3457.41			0.51444		8	71.181	5482.51	1568	8655	390252	15976044	5212.41	0.775574		8	84.641	5399.32	2914	9879	457002	18708631	3824.76	0.569101
	9	100.665	3320.25	423	5615	334233	13682758	3108.03			0.462456												9	48.586	3705.71	2229	5899	180045	7370659	2274.91	0.338493
	BKG 1	121.233	219.949	157	322	26665.1	1091608						BKG 1	62.778	212.044	89	651	13311.8	544954				BKG 1	72.671	671.635	158	1340	48808.6	1998115
	BKG 2	89.135	239.864	180	336	21380.4	875264						BKG 2	77.996	204.644	93	1018	15961.5	653427				BKG 2	60.726	409.778	147	1170	24884.3	1018707
	BKG 3	97.196	181.789	108	283	17669.2	723338						BKG 3	85.203	1475.53	791	2809	125719	5146662				BKG 3	57.942	756.721	162	1707	43845.7	1794943
	BKG 4	95.682	275.986	194	483	26406.9	1081039						BKG 4	72.109	220.193	89	714	15878	650011				BKG 4	70.79	1202.15	190	3040	85100.4	3483819
	BKG 5	92.238	195.817	114	311	18061.7	739406						BKG 5	61.288	204.283	95	685	12520.1	512545				BKG 5	98.173	1445.9	907	2231	141949	5811083
	BKG 6	85.911	123.702	71	244	10627.4	435061						BKG 6	101.813	2272.2	1316	3849	231340	9470549				BKG 6	116.005	1393.33	833	2171	161634	6616945
	BKG 7	58.039	105.383	73	211	6116.36	250390						BKG 7	55.719	208.945	94	449	11642.2	476604				BKG 7	75.7	1884.67	826	3307	142670	5840599
	BKG 8	74.357	241.815	184	358	17980.6	736084						BKG 8	71.181	270.103	908	3678	126310	5170863				BKG 8	84.641	1574.55	994	2497	133271	5455818
	BKG 9	100.665	212.217	142	338	21362.9	874548																BKG 9	48.586	1430.8	868	2040	69516.6	2845856
													69 image										image 70
	68 image sum

## Sheet: Analysis
Non-induced	Induced		Number of values	23	25		Table Analyzed	Normalized to non-induced
0.872596	0.33735
0.585525	0.173423		Minimum	3890	1020		Column B	Induced
1.03217	0.400178		25% Percentile	4649	2482		vs.	vs.
0.958837	0.151744		Median	6444	3457		Column A	Non-induced
1.15707	0.54537		75% Percentile	6937	5203
0.691674	0.772822		Maximum	10683	7680		Mann Whitney test
0.871901	0.568096						P value	< 0.0001
0.77141	0.51444		Mean	6400	3872		Exact or approximate P value?	Exact
0.685653	0.462456		Std. Deviation	1814	1823		P value summary	****
0.6	0.838875		Std. Error of Mean	378.2	364.7		Significantly different? (P < 0.05)	Yes
0.891623	0.959504						One- or two-tailed P value?	Two-tailed
0.632327	0.431588		Lower 95% CI of mean	5615	3120		Sum of ranks in column A,B	760.0 , 416.0
0.66896	0.975729		Upper 95% CI of mean	7184	4625		Mann-Whitney U	91
1.34626	0.607181
0.94392	0.753244		D'Agostino & Pearson omnibus normality test				Difference between medians
0.967234	0.775574		K2	2.239	1.797		Median of column A	0.9588
1.58954	0.32135		P value	0.3264	0.4072		Median of column B	0.5144
0.965751	0.429303		Passed normality test (alpha=0.05)?	Yes	Yes		Difference: Actual	-0.4444
0.985639	0.42039		P value summary	ns	ns		Difference: Hodges-Lehmann	-0.3897
1.37772	1.08511
1.35605	0.49389		Shapiro-Wilk normality test
0.986041	0.336948		W	0.9287	0.9445
0.984377	1.14267		P value	0.1027	0.1876
	0.569101		Passed normality test (alpha=0.05)?	Yes	Yes
	0.338493		P value summary	ns	ns
			KS normality test
			KS distance	0.1893	0.1504
			P value	0.032	0.1506
			Passed normality test (alpha=0.05)?	No	Yes
			P value summary	*	ns
			Sum	147191	96811
