# Supplementary material for: Enhanced insulin signalling ameliorates C9orf72 hexanucleotide repeat expansion toxicity in Drosophila
Source: eLife journal article supplement (doi:10.7554/elife.58565), 2021-03-19
Supplement: supp [file elife-58565-supp-v1.zip › elife_poa_e58565_Figure_1_figure_supplement_4_source_data_1.xlsx]

## Sheet: Sheet1
Source data pertained to Figure 1 - figure supplement 4B
Imagej quantification	westernblot
4E-BP1 non phosphorylated		normalized to actin			Sample	4E-BP1 Non-Phosp	4E-BP1 Phosp	Phosp/Non-Phosp
(G4C2)36/+	15448.4	3.29982			(G4C2)36/+	3.29982	1.85614	0.562497
(G4C2)36/+	19312.2	3.00335			(G4C2)36/+	3.00335	1.7637	0.587243
(G4C2)36/+	27122.9	3.25437			(G4C2)36/+	3.25437	1.76672	0.542875
(G4C2)36/InR active	17590.2	0.762433			(G4C2)36/InR active	0.762433	0.859071	1.12675
(G4C2)36/InR active	11850.9	0.519714			(G4C2)36/InR active	0.519714	0.673774	1.29643
(G4C2)36/InR active	14228.7	0.646728			(G4C2)36/InR active	0.646728	0.503772	0.778954
Actin control					Statistical analysis _ GraphPad Prism
(G4C2)36/+	4681.59
(G4C2)36/+	6430.22				(G4C2)/+ vs. (G4C2)/InRActive
(G4C2)36/+	8334.31
(G4C2)36/InR active	23071.1
(G4C2)36/InR active	22802.7				Unpaired t test
(G4C2)36/InR active	22001				P value	0.0302
					P value summary	*
					Significantly different? (P < 0.05)	Yes
4E-BP1 phosphorylated		normalized to actin			One- or two-tailed P value?	Two-tailed
(G4C2)36/+	20799	1.85614			t, df	t=3.292 df=4
(G4C2)36/+	19833.4	1.7637
(G4C2)36/+	18388.6	1.76672			How big is the difference?
(G4C2)36/InR active	24097.8	0.859071			Mean ± SEM of column A	0.5642 ± 0.01284 N=3
(G4C2)36/InR active	16953.2	0.673774			Mean ± SEM of column B	1.067 ± 0.1523 N=3
(G4C2)36/InR active	14949.5	0.503772			Difference between means	0.5032 ± 0.1528
					95% confidence interval	0.07881 to 0.9275
Actin control					R squared	0.7304
(G4C2)36/+	11205.5
(G4C2)36/+	11245.3
(G4C2)36/+	10408.3
(G4C2)36/InR active	28051
(G4C2)36/InR active	25161.5
(G4C2)36/InR active	29675.2
