# Supplementary material for: Enhanced insulin signalling ameliorates C9orf72 hexanucleotide repeat expansion toxicity in Drosophila
Source: eLife journal article supplement (doi:10.7554/elife.58565), 2021-03-19
Supplement: supp [file elife-58565-supp-v1.zip › elife_poa_e58565_Figure_1_source_data_1.xlsx]

## Sheet: Func_enrichment_table_Downregul
GO.ID	GOTerm	Annotated genes	Significant genes	Enrichment	P- value	Ensembl ID	Gene Symbol	Ontology.Source	Enrichment_for
GO:0002181	cytoplasmic translation	113	72	19.86	4.8e-28	FBgn0001942, FBgn0002579, FBgn0002590, FBgn0002622, FBgn0002626, FBgn0003274, FBgn0003279, FBgn0003517, FBgn0003941, FBgn0003942, FBgn0004867, FBgn0004882, FBgn0005533, FBgn0005593, FBgn0010078, FBgn0010265, FBgn0010408, FBgn0010409, FBgn0010411, FBgn0010412, FBgn0011272, FBgn0011284, FBgn0013325, FBgn0014026, FBgn0015218, FBgn0015288, FBgn0015521, FBgn0015756, FBgn0016726, FBgn0017545, FBgn00175…	eIF4A, RpL36, RpS5a, RpS3, RpL32, RpLP2, RpL4, sta, RpL40, RpS27A, RpS2, orb, RpS17, RpL7, RpL23, RpS13, RpS9, RpL18A, RpS18, RpS19a, RpL13, RpS4, RpL11, RpL7A, eIF4E1, RpL22, RpS21, RpL9, RpL29, RpS3A, RpL14, eRF3, RpL3, RpL39, RpL10, RpL35, RpL17, RpS28b, RpL37a, RpL36A, RpL24, RpL21, RpS11, RpS23, RpS15, RpS16, CNBP, RpL12, RpL28, eIF1, RpL18, Dph1, RpL10Ab, RpL26, eIF3a, RpL35A, RpL13A, RpL34…	Biological_pathways	Down-regulated genes only
GO:0007218	neuropeptide signaling pathway	45	26	7.91	1.4e-09	FBgn0000500, FBgn0003255, FBgn0004622, FBgn0011581, FBgn0012344, FBgn0013767, FBgn0023178, FBgn0027109, FBgn0028374, FBgn0028418, FBgn0031770, FBgn0032048, FBgn0032336, FBgn0032840, FBgn0035023, FBgn0035092, FBgn0036713, FBgn0037408, FBgn0037976, FBgn0038880, FBgn0039722, FBgn0040813, FBgn0041707, FBgn0042201, FBgn0053527, FBgn0260753	Dsk, rk, TkR99D, Ms, Dh44, Crz, Pdf, NPF, Hug, Lk, CG13995, Dh31, AstC, sNPF, ITP, Nplp1, Mip, NPFR, Tk, SIFaR, Capa, Nplp2, Ilp2, Nplp3, SIFa, Pdfr	Biological_pathways	Down-regulated genes only
GO:0010499	proteasomal ubiquitin-independent protein catabolic process	14	13	2.46	1.7e-09	FBgn0002284, FBgn0004066, FBgn0010590, FBgn0016697, FBgn0023174, FBgn0023175, FBgn0026380, FBgn0029134, FBgn0032596, FBgn0086134, FBgn0250746, FBgn0250843, FBgn0261394	Prosbeta6, Prosalpha4, Prosbeta1, Prosalpha5, Prosbeta2, Prosalpha7, Prosbeta3, Prosbeta5, Prosbeta4, Prosalpha2, Prosbeta7, Prosalpha6, Prosalpha3	Biological_pathways	Down-regulated genes only
GO:0042391	regulation of membrane potential	70	32	12.3	4.2e-08	FBgn0000036, FBgn0000535, FBgn0001134, FBgn0001220, FBgn0003380, FBgn0003429, FBgn0004244, FBgn0010399, FBgn0011661, FBgn0015519, FBgn0016120, FBgn0017561, FBgn0024963, FBgn0026439, FBgn0029147, FBgn0029761, FBgn0031261, FBgn0031424, FBgn0033257, FBgn0038165, FBgn0039081, FBgn0039647, FBgn0040752, FBgn0085387, FBgn0085434, FBgn0260971, FBgn0262593, FBgn0263397, FBgn0264087, FBgn0264386, FBgn02646…	nAChRalpha1, eag, Grd, Hsc70-5, Sh, slo, Rdl, Nmdar1, Moe, nAChRalpha3, ATPsynD, Ork1, GluClalpha, Eaat1, NtR, SK, nAChRbeta3, VGlut, sand, Task6, Irk2, jus, Prosap, shakB, NaCP60E, CG42594, Shab, Ih, Slob, Ca-alpha1T, Fife, Piezo	Biological_pathways	Down-regulated genes only
GO:0009612	response to mechanical stimulus	22	15	3.87	2.2e-07	FBgn0000536, FBgn0002921, FBgn0004244, FBgn0004516, FBgn0010473, FBgn0027575, FBgn0032946, FBgn0033159, FBgn0039152, FBgn0039647, FBgn0039915, FBgn0086355, FBgn0261794, FBgn0264953, FBgn0265434	eas, Atpalpha, Rdl, Gad1, tutl, GABA-B-R2, nrv3, Dscam1, Root, jus, Gat, Tpi, kcc, Piezo, zip	Biological_pathways	Down-regulated genes only
GO:0055085	transmembrane transport	407	137	71.53	1.8e-06	FBgn0000036, FBgn0000241, FBgn0000535, FBgn0001134, FBgn0001296, FBgn0002917, FBgn0002921, FBgn0003380, FBgn0003429, FBgn0003861, FBgn0004244, FBgn0004363, FBgn0004611, FBgn0005564, FBgn0005671, FBgn0010217, FBgn0010497, FBgn0010638, FBgn0010747, FBgn0011211, FBgn0011584, FBgn0011672, FBgn0013953, FBgn0013995, FBgn0014391, FBgn0015245, FBgn0015519, FBgn0015777, FBgn0016041, FBgn0016119, FBgn00161…	nAChRalpha1, bw, eag, Grd, kar, na, Atpalpha, Sh, slo, trp, Rdl, porin, Plc21C, Shal, Vha55, ATPsynbeta, dmGlut, Sec61beta, Srp54k, blw, Trp1, Mvl, Esp, Calx, sun, Hsp60A, nAChRalpha3, nrv2, Tom40, ATPsynCF6, ATPsynD, ATPsynO, Ork1, ATPsynB, Orct, ATPsyngamma, Vha36-1, Mct1, Picot, GluClalpha, CG3164, MFS18, Mpcp2, Eaat1, Dic1, VhaSFD, JhI-21, aralar1, VhaPPA1-1, Vha100-2, Nckx30C, NtR, SK, NAAT1…	Biological_pathways	Down-regulated genes only
GO:0006614	SRP-dependent cotranslational protein targeting to membrane	12	9	2.11	2.1e-05	FBgn0010391, FBgn0010638, FBgn0010747, FBgn0015298, FBgn0025700, FBgn0035771, FBgn0035947, FBgn0038810, FBgn0086357	Gtp-bp, Sec61beta, Srp54k, Srp19, CG5885, Sec63, Srp68, Srp72, Sec61alpha	Biological_pathways	Down-regulated genes only
GO:0042749	regulation of circadian sleep/wake cycle	39	20	6.85	2.8e-05	FBgn0000273, FBgn0001233, FBgn0003380, FBgn0004244, FBgn0011204, FBgn0014396, FBgn0019643, FBgn0023076, FBgn0023178, FBgn0024944, FBgn0025680, FBgn0027348, FBgn0032048, FBgn0033257, FBgn0036927, FBgn0053527, FBgn0260753, FBgn0261953, FBgn0262593, FBgn0263397	Pka-C1, Hsp83, Sh, Rdl, cue, tim, AANAT1, Clk, Pdf, Oamb, cry, bgm, Dh31, sand, Gabat, SIFa, Pdfr, TfAP-2, Shab, Ih	Biological_pathways	Down-regulated genes only
GO:0015986	ATP synthesis coupled proton transport	15	10	2.64	3.5e-05	FBgn0010217, FBgn0011211, FBgn0014391, FBgn0016119, FBgn0016120, FBgn0016691, FBgn0019644, FBgn0020235, FBgn0038224, FBgn0039830	ATPsynbeta, blw, sun, ATPsynCF6, ATPsynD, ATPsynO, ATPsynB, ATPsyngamma, ATPsynE, ATPsynC	Biological_pathways	Down-regulated genes only
GO:0007189	adenylate cyclase-activating G protein-coupled receptor signaling pathway	28	14	4.92	8.6e-05	FBgn0003255, FBgn0004573, FBgn0004852, FBgn0011582, FBgn0016650, FBgn0022710, FBgn0023178, FBgn0024150, FBgn0032048, FBgn0033313, FBgn0038063, FBgn0039747, FBgn0053517, FBgn0260753	rk, 5-HT7, Ac76E, Dop1R1, Lgr1, Ac13E, Pdf, Ac78C, Dh31, Cirl, Octbeta2R, AdoR, Dop2R, Pdfr	Biological_pathways	Down-regulated genes only
GO:1902600	proton transmembrane transport	40	23	7.03	8.6e-05	FBgn0002921, FBgn0005671, FBgn0010217, FBgn0011211, FBgn0014391, FBgn0016119, FBgn0016120, FBgn0016691, FBgn0019644, FBgn0020235, FBgn0022097, FBgn0027779, FBgn0028662, FBgn0028670, FBgn0035032, FBgn0037671, FBgn0038224, FBgn0039830, FBgn0259111, FBgn0259150, FBgn0262511, FBgn0262736, FBgn0263598	Atpalpha, Vha55, ATPsynbeta, blw, sun, ATPsynCF6, ATPsynD, ATPsynO, ATPsynB, ATPsyngamma, Vha36-1, VhaSFD, VhaPPA1-1, Vha100-2, ATPsynF, ATP6AP2, ATPsynE, ATPsynC, Ndae1, OtopLc, Vha44, Vha16-1, Vha68-2	Biological_pathways	Down-regulated genes only
GO:0071711	basement membrane organization	19	11	3.34	9e-05	FBgn0000299, FBgn0016075, FBgn0026403, FBgn0026562, FBgn0033438, FBgn0035049, FBgn0260660, FBgn0261800, FBgn0262125, FBgn0262126, FBgn0267348	Col4a1, vkg, Ndg, SPARC, Mmp2, Mmp1, Mp, LanB1, Sec23, Sec24CD, LanB2	Biological_pathways	Down-regulated genes only
GO:0006090	pyruvate metabolic process	27	16	4.75	0.00022	FBgn0000579, FBgn0001091, FBgn0001092, FBgn0002719, FBgn0003067, FBgn0003071, FBgn0004647, FBgn0012036, FBgn0014869, FBgn0027580, FBgn0028325, FBgn0029155, FBgn0038662, FBgn0039635, FBgn0086355, FBgn0250906	Eno, Gapdh1, Gapdh2, Men, Pepck1, Pfk, N, Aldh, Pglym78, PCB, Pdha, Men-b, Mpc1, Pdhb, Tpi, Pgk	Biological_pathways	Down-regulated genes only
GO:0006006	glucose metabolic process	30	14	5.27	0.00022	FBgn0001091, FBgn0001092, FBgn0003067, FBgn0003071, FBgn0004057, FBgn0020618, FBgn0027550, FBgn0027580, FBgn0032820, FBgn0032840, FBgn0036428, FBgn0043783, FBgn0086355, FBgn0250906	Gapdh1, Gapdh2, Pepck1, Pfk, Zw, Rack1, CG6495, PCB, fbp, sNPF, Gbs-70E, CG32444, Tpi, Pgk	Biological_pathways	Down-regulated genes only
GO:0010883	regulation of lipid storage	37	16	6.5	0.00024	FBgn0001257, FBgn0003651, FBgn0008635, FBgn0010348, FBgn0010350, FBgn0025724, FBgn0025725, FBgn0028550, FBgn0028969, FBgn0029975, FBgn0036211, FBgn0036816, FBgn0036919, FBgn0038197, FBgn0039114, FBgn0267339	ImpL2, svp, betaCOP, Arf79F, Cds, beta'COP, alphaCOP, Atf3, deltaCOP, spidey, CG5946, Indy, Grasp65, foxo, Lsd-1, p38c	Biological_pathways	Down-regulated genes only
GO:0009060	aerobic respiration	37	16	6.5	0.00024	FBgn0015031, FBgn0019624, FBgn0024957, FBgn0027291, FBgn0030612, FBgn0030733, FBgn0032833, FBgn0034877, FBgn0036762, FBgn0037891, FBgn0039112, FBgn0039827, FBgn0040529, FBgn0040773, FBgn0261955, FBgn0262559	cype, COX5A, Irp-1B, Idh3a, CG5599, UQCR-14, COX4, levy, CG7430, CG5214, SdhD, CG1544, COX7A, COX7C, kdn, Mdh2	Biological_pathways	Down-regulated genes only
GO:0006084	acetyl-CoA metabolic process	10	7	1.76	0.00037	FBgn0003965, FBgn0010611, FBgn0012034, FBgn0020236, FBgn0028325, FBgn0039635, FBgn0039737	v, Hmgs, AcCoAS, ATPCL, Pdha, Pdhb, CG7920	Biological_pathways	Down-regulated genes only
GO:0050804	modulation of chemical synaptic transmission	110	38	19.33	0.00038	FBgn0000273, FBgn0000346, FBgn0003380, FBgn0003429, FBgn0003462, FBgn0004244, FBgn0004580, FBgn0004611, FBgn0004622, FBgn0004636, FBgn0005586, FBgn0011288, FBgn0013334, FBgn0013973, FBgn0026439, FBgn0027575, FBgn0030897, FBgn0030941, FBgn0031424, FBgn0031866, FBgn0032895, FBgn0033872, FBgn0034972, FBgn0040752, FBgn0041605, FBgn0053547, FBgn0064123, FBgn0083963, FBgn0083975, FBgn0086677, FBgn02507…	Pka-C1, comt, Sh, slo, Sod1, Rdl, Cbp53E, Plc21C, TkR99D, Rap1, Rab3, Snap25, Sap47, Gycbeta100B, Eaat1, GABA-B-R2, Frq1, wgn, VGlut, Nlg2, twit, CG6329, CG10339, Prosap, cpx, Rim, stg1, Nlg3, Nlg4, jeb, alpha-Spec, brp, Dys, Shab, Src64B, Ih, Slob, Fife	Biological_pathways	Down-regulated genes only
GO:0007156	homophilic cell adhesion via plasma membrane adhesion molecules	42	17	7.38	0.0004	FBgn0000547, FBgn0001083, FBgn0001257, FBgn0005775, FBgn0010473, FBgn0015609, FBgn0017590, FBgn0023095, FBgn0024189, FBgn0024836, FBgn0039294, FBgn0039709, FBgn0261046, FBgn0261574, FBgn0265002, FBgn0265296, FBgn0267435	ed, fw, ImpL2, Con, tutl, CadN, klg, caps, sns, stan, Cad96Cb, Cad99C, Dscam3, kug, CG44153, Dscam2, chp	Biological_pathways	Down-regulated genes only
GO:0035725	sodium ion transmembrane transport	13	8	2.28	0.0005	FBgn0002921, FBgn0015777, FBgn0032946, FBgn0036279, FBgn0040297, FBgn0051547, FBgn0085434, FBgn0259111	Atpalpha, nrv2, nrv3, Ncc69, Nhe2, NKCC, NaCP60E, Ndae1	Biological_pathways	Down-regulated genes only
GO:0042493	response to drug	155	44	27.24	0.00052	FBgn0000037, FBgn0000173, FBgn0000273, FBgn0002917, FBgn0003371, FBgn0003380, FBgn0003429, FBgn0003731, FBgn0004244, FBgn0005626, FBgn0010399, FBgn0010497, FBgn0012034, FBgn0012036, FBgn0013767, FBgn0013949, FBgn0017590, FBgn0023076, FBgn0023129, FBgn0024150, FBgn0026439, FBgn0026718, FBgn0027610, FBgn0028646, FBgn0031424, FBgn0033065, FBgn0033257, FBgn0033391, FBgn0036381, FBgn0036428, FBgn00366…	mAChR-A, ben, Pka-C1, na, sgg, Sh, slo, Egfr, Rdl, ple, Nmdar1, dmGlut, AcCoAS, Aldh, Crz, Elal, klg, Clk, aay, Ac78C, Eaat1, Agpat2, Dic1, aralar1, VGlut, Cyp6w1, sand, CG8026, CG8745, Gbs-70E, rogdi, Indy, CG17734, sea, phu, Gclm, Tdc2, alpha-Man-Ia, Pka-R1, Tdc1, Ih, Bx, Pde8, Ggamma30A	Biological_pathways	Down-regulated genes only
GO:1990709	presynaptic active zone organization	16	9	2.81	0.00054	FBgn0004449, FBgn0005586, FBgn0031866, FBgn0039883, FBgn0250789, FBgn0259246, FBgn0262483, FBgn0264606, FBgn0267001	Ten-m, Rab3, Nlg2, RhoGAP100F, alpha-Spec, brp, Rbp, Fife, Ten-a	Biological_pathways	Down-regulated genes only
GO:0008039	synaptic target recognition	43	17	7.56	0.00055	FBgn0004449, FBgn0005775, FBgn0010114, FBgn0010473, FBgn0015774, FBgn0016797, FBgn0031381, FBgn0033791, FBgn0034718, FBgn0035539, FBgn0085407, FBgn0085414, FBgn0250871, FBgn0262473, FBgn0262509, FBgn0264089, FBgn0267001	Ten-m, Con, hig, tutl, NetB, fz2, Npc2a, Drl-2, wdp, slow, Pvf3, dpr12, pot, Tl, nrm, sli, Ten-a	Biological_pathways	Down-regulated genes only
GO:0042775	mitochondrial ATP synthesis coupled electron transport	55	20	9.67	0.00067	FBgn0001989, FBgn0011361, FBgn0015031, FBgn0019624, FBgn0029888, FBgn0029971, FBgn0030733, FBgn0031436, FBgn0032833, FBgn0034245, FBgn0034645, FBgn0034877, FBgn0035046, FBgn0037001, FBgn0038271, FBgn0039112, FBgn0040529, FBgn0040773, FBgn0047038, FBgn0250814	ND-B17, ND-ACP, cype, COX5A, ND-ASHI, ND-MNLL, UQCR-14, ND-B17.2, COX4, UQCR-6.4, ND-B12, levy, ND-19, ND-39, UQCR-C1, SdhD, COX7A, COX7C, ND-13B, UQCR-C2	Biological_pathways	Down-regulated genes only
GO:1905039	carboxylic acid transmembrane transport	40	16	7.03	0.00068	FBgn0026439, FBgn0027610, FBgn0028425, FBgn0028646, FBgn0029762, FBgn0031424, FBgn0035969, FBgn0036007, FBgn0036279, FBgn0037714, FBgn0037715, FBgn0037912, FBgn0038641, FBgn0038662, FBgn0051547, FBgn0261794	Eaat1, Dic1, JhI-21, aralar1, NAAT1, VGlut, CG4476, path, Ncc69, CG9396, CG9399, sea, CG7708, Mpc1, NKCC, kcc	Biological_pathways	Down-regulated genes only
GO:0042052	rhabdomere development	40	16	7.03	0.00068	FBgn0002940, FBgn0011661, FBgn0011726, FBgn0015790, FBgn0026252, FBgn0027356, FBgn0031414, FBgn0033179, FBgn0034070, FBgn0037896, FBgn0259210, FBgn0259481, FBgn0261458, FBgn0261714, FBgn0265487, FBgn0267435	ninaE, Moe, tsr, Rab11, msk, Amph, eys, p47, SP2353, ninaG, prom, Mob2, capt, Cpn, mbl, chp	Biological_pathways	Down-regulated genes only
GO:0045187	regulation of circadian sleep/wake cycle, sleep	33	14	5.8	0.00073	FBgn0000273, FBgn0001233, FBgn0003380, FBgn0011204, FBgn0014396, FBgn0019643, FBgn0023076, FBgn0025680, FBgn0027348, FBgn0033257, FBgn0053527, FBgn0261953, FBgn0262593, FBgn0263397	Pka-C1, Hsp83, Sh, cue, tim, AANAT1, Clk, cry, bgm, sand, SIFa, TfAP-2, Shab, Ih	Biological_pathways	Down-regulated genes only
GO:0042593	glucose homeostasis	33	14	5.8	0.00073	FBgn0000579, FBgn0001092, FBgn0003067, FBgn0003071, FBgn0003651, FBgn0004654, FBgn0005558, FBgn0015721, FBgn0020236, FBgn0029155, FBgn0032940, FBgn0038197, FBgn0086355, FBgn0264574	Eno, Gapdh2, Pepck1, Pfk, svp, Pgd, ey, ktub, ATPCL, Men-b, Mondo, foxo, Tpi, Glut1	Biological_pathways	Down-regulated genes only
GO:0016056	rhodopsin mediated signaling pathway	23	11	4.04	0.00081	FBgn0000120, FBgn0002938, FBgn0002940, FBgn0003218, FBgn0003861, FBgn0004623, FBgn0010350, FBgn0015721, FBgn0036260, FBgn0086704, FBgn0265959	Arr1, ninaC, ninaE, rdgB, trp, Gbeta76C, Cds, ktub, Rh7, stops, rdgC	Biological_pathways	Down-regulated genes only
GO:0045047	protein targeting to ER	18	14	3.16	0.00083	FBgn0010391, FBgn0010638, FBgn0010747, FBgn0011584, FBgn0015298, FBgn0025700, FBgn0030306, FBgn0032640, FBgn0035771, FBgn0035947, FBgn0036300, FBgn0038810, FBgn0040623, FBgn0086357	Gtp-bp, Sec61beta, Srp54k, Trp1, Srp19, CG5885, Spase25, Sgt, Sec63, Srp68, Pmm2, Srp72, Spase12, Sec61alpha	Biological_pathways	Down-regulated genes only
GO:0042221	response to chemical	841	212	147.81	0.00085	FBgn0000036, FBgn0000037, FBgn0000173, FBgn0000273, FBgn0000370, FBgn0000504, FBgn0000535, FBgn0000565, FBgn0000659, FBgn0001218, FBgn0001220, FBgn0001248, FBgn0001257, FBgn0001942, FBgn0002031, FBgn0002868, FBgn0002917, FBgn0003067, FBgn0003071, FBgn0003090, FBgn0003118, FBgn0003255, FBgn0003371, FBgn0003380, FBgn0003429, FBgn0003462, FBgn0003463, FBgn0003651, FBgn0003731, FBgn0003861, FBgn00038…	nAChRalpha1, mAChR-A, ben, Pka-C1, crc, dsx, eag, Eip71CD, fkh, Hsc70-3, Hsc70-5, Idh, ImpL2, eIF4A, l(2)37Cc, MtnA, na, Pepck1, Pfk, pk, pnt, rk, sgg, Sh, slo, Sod1, sog, svp, Egfr, trp, betaTub60D, tup, uzip, ct, Rdl, Ptp10D, Ten-m, Gad1, pros, zfh1, TkR99D, Rap1, drk, N, 14-3-3zeta, Ggamma1, ple, nvy, Con, Nmdar1, trn, tutl, dmGlut, lwr, Dop1R1, ine, Moe, Mvl, Tig, AcCoAS, Aldh, Dh44, Chi, Crz…	Biological_pathways	Down-regulated genes only
GO:0006721	terpenoid metabolic process	11	7	1.93	0.00087	FBgn0002937, FBgn0010053, FBgn0010611, FBgn0011693, FBgn0032336, FBgn0036713, FBgn0037896	ninaB, Jheh1, Hmgs, Pdh, AstC, Mip, ninaG	Biological_pathways	Down-regulated genes only
GO:0050878	regulation of body fluid levels	11	7	1.93	0.00087	FBgn0011603, FBgn0012344, FBgn0028418, FBgn0029167, FBgn0032048, FBgn0032773, FBgn0266569	ine, Dh44, Lk, Hml, Dh31, fon, CG42259	Biological_pathways	Down-regulated genes only
GO:0006835	dicarboxylic acid transport	14	8	2.46	0.00098	FBgn0010497, FBgn0026439, FBgn0027610, FBgn0028646, FBgn0031424, FBgn0033391, FBgn0036816, FBgn0263397	dmGlut, Eaat1, Dic1, aralar1, VGlut, CG8026, Indy, Ih	Biological_pathways	Down-regulated genes only
GO:0009065	glutamine family amino acid catabolic process	14	8	2.46	0.00098	FBgn0001098, FBgn0001145, FBgn0003423, FBgn0004516, FBgn0022774, FBgn0023535, FBgn0037138, FBgn0261014	Gdh, Gs2, slgA, Gad1, Oat, arg, P5CDh1, TER94	Biological_pathways	Down-regulated genes only
GO:0019226	transmission of nerve impulse	14	8	2.46	0.00098	FBgn0001134, FBgn0011603, FBgn0031634, FBgn0036937, FBgn0064123, FBgn0085434, FBgn0262870, FBgn0264386	Grd, ine, Ir25a, Ir76b, stg1, NaCP60E, axo, Ca-alpha1T	Biological_pathways	Down-regulated genes only
GO:0071805	potassium ion transmembrane transport	37	18	6.5	0.00103	FBgn0000535, FBgn0002921, FBgn0003380, FBgn0005564, FBgn0015777, FBgn0017561, FBgn0029761, FBgn0032689, FBgn0032946, FBgn0033257, FBgn0033872, FBgn0036279, FBgn0038165, FBgn0040297, FBgn0051547, FBgn0260971, FBgn0262593, FBgn0263390	eag, Atpalpha, Sh, Shal, nrv2, Ork1, SK, CG10413, nrv3, sand, CG6329, Ncc69, Task6, Nhe2, NKCC, CG42594, Shab, Nha2	Biological_pathways	Down-regulated genes only
GO:0007617	mating behavior	73	29	12.83	0.00109	FBgn0000504, FBgn0000535, FBgn0000592, FBgn0003380, FBgn0003429, FBgn0004227, FBgn0004573, FBgn0004595, FBgn0005626, FBgn0013953, FBgn0014396, FBgn0023178, FBgn0024944, FBgn0027109, FBgn0030437, FBgn0031866, FBgn0034475, FBgn0034636, FBgn0034638, FBgn0038839, FBgn0038880, FBgn0039298, FBgn0044048, FBgn0044050, FBgn0053527, FBgn0086676, FBgn0261953, FBgn0264815, FBgn0265487	dsx, eag, Est-6, Sh, slo, nonA, 5-HT7, pros, ple, Esp, tim, Pdf, Oamb, NPF, hec, Nlg2, Obp56h, twz, CG10433, Ktl, SIFaR, to, Ilp5, Ilp3, SIFa, spin, TfAP-2, Pde1c, mbl	Biological_pathways	Down-regulated genes only
GO:0008045	motor neuron axon guidance	65	22	11.42	0.00112	FBgn0003896, FBgn0004370, FBgn0004449, FBgn0004606, FBgn0004647, FBgn0010452, FBgn0015774, FBgn0016061, FBgn0016797, FBgn0023095, FBgn0033438, FBgn0033791, FBgn0034013, FBgn0038084, FBgn0038087, FBgn0038494, FBgn0038498, FBgn0039584, FBgn0260660, FBgn0261509, FBgn0263930, FBgn0267001	tup, Ptp10D, Ten-m, zfh1, N, trn, NetB, side, fz2, caps, Mmp2, Drl-2, unc-5, beat-Vc, beat-Va, beat-IIb, beat-IIa, beat-VI, Mp, haf, dally, Ten-a	Biological_pathways	Down-regulated genes only
GO:0030537	larval behavior	38	15	6.68	0.00117	FBgn0000500, FBgn0003380, FBgn0003888, FBgn0004516, FBgn0010473, FBgn0023179, FBgn0026439, FBgn0026562, FBgn0027109, FBgn0028374, FBgn0029161, FBgn0031866, FBgn0032840, FBgn0037408, FBgn0262593	Dsk, Sh, betaTub60D, Gad1, tutl, amon, Eaat1, SPARC, NPF, Hug, slmo, Nlg2, sNPF, NPFR, Shab	Biological_pathways	Down-regulated genes only
GO:0007186	G protein-coupled receptor signaling pathway	176	73	30.93	0.00125	FBgn0000037, FBgn0000120, FBgn0000273, FBgn0000500, FBgn0002938, FBgn0002940, FBgn0003218, FBgn0003255, FBgn0003861, FBgn0004573, FBgn0004622, FBgn0004623, FBgn0004852, FBgn0004921, FBgn0010350, FBgn0011581, FBgn0011582, FBgn0012344, FBgn0013767, FBgn0014019, FBgn0014391, FBgn0015721, FBgn0016650, FBgn0022710, FBgn0023178, FBgn0024150, FBgn0024836, FBgn0024944, FBgn0025595, FBgn0027109, FBgn00275…	mAChR-A, Arr1, Pka-C1, Dsk, ninaC, ninaE, rdgB, rk, trp, 5-HT7, TkR99D, Gbeta76C, Ac76E, Ggamma1, Cds, Ms, Dop1R1, Dh44, Crz, Rh5, sun, ktub, Lgr1, Ac13E, Pdf, Ac78C, stan, Oamb, AkhR, NPF, GABA-B-R2, Hug, Lk, Gbeta5, hec, CG13995, Dh31, AstC, sNPF, Cirl, Dh44-R2, CG13579, ITP, Nplp1, CNMa, mthl2, Rh7, Mip, NPFR, Tk, Octbeta2R, foxo, Trissin, Octalpha2R, ETHR, SIFaR, Capa, AdoR, Nplp2, 7B2, Nplp3…	Biological_pathways	Down-regulated genes only
GO:0007608	sensory perception of smell	54	19	9.49	0.00142	FBgn0000120, FBgn0000535, FBgn0003218, FBgn0003656, FBgn0004622, FBgn0011280, FBgn0031634, FBgn0033065, FBgn0034470, FBgn0034471, FBgn0034475, FBgn0036937, FBgn0037976, FBgn0037989, FBgn0039678, FBgn0043533, FBgn0046878, FBgn0051163, FBgn0261588	Arr1, eag, rdgB, sws, TkR99D, Obp19d, Ir25a, Cyp6w1, Obp56d, Obp56e, Obp56h, Ir76b, Tk, ATP8B, Obp99a, Obp56f, Obp83cd, SKIP, pdm3	Biological_pathways	Down-regulated genes only
GO:0008049	male courtship behavior	35	14	6.15	0.00146	FBgn0000504, FBgn0003429, FBgn0004227, FBgn0004573, FBgn0004595, FBgn0005626, FBgn0024944, FBgn0027109, FBgn0030437, FBgn0031866, FBgn0034636, FBgn0038839, FBgn0039298, FBgn0261953	dsx, slo, nonA, 5-HT7, pros, ple, Oamb, NPF, hec, Nlg2, twz, Ktl, to, TfAP-2	Biological_pathways	Down-regulated genes only
GO:0019725	cellular homeostasis	184	54	32.34	0.00155	FBgn0000346, FBgn0000500, FBgn0002921, FBgn0003067, FBgn0003861, FBgn0004580, FBgn0004606, FBgn0004611, FBgn0004647, FBgn0005671, FBgn0010387, FBgn0010470, FBgn0011582, FBgn0014002, FBgn0015622, FBgn0015777, FBgn0020618, FBgn0024944, FBgn0024957, FBgn0025678, FBgn0027095, FBgn0027348, FBgn0028418, FBgn0028670, FBgn0028704, FBgn0030329, FBgn0030941, FBgn0031879, FBgn0032689, FBgn0032746, FBgn00329…	comt, Dsk, Atpalpha, Pepck1, trp, Cbp53E, zfh1, Plc21C, N, Vha55, Acbp2, Fkbp14, Dop1R1, Pdi, Cnx99A, nrv2, Rack1, Oamb, Irp-1B, CaBP1, Manf, bgm, Lk, Vha100-2, Nckx30C, prtp, wgn, uif, CG10413, CG10470, nrv3, ERp60, SP2353, Ncc69, rogdi, CG7430, Prx3, Prx5, Capa, Trx-2, Best1, Nhe2, Jafrac1, NKCC, Mid1, EMRE, Pgk, Ndae1, Dys, TER94, capt, Cpn, Vha68-2, mbl	Biological_pathways	Down-regulated genes only
GO:0006536	glutamate metabolic process	12	7	2.11	0.00177	FBgn0001098, FBgn0001145, FBgn0003423, FBgn0004516, FBgn0022774, FBgn0036927, FBgn0037138	Gdh, Gs2, slgA, Gad1, Oat, Gabat, P5CDh1	Biological_pathways	Down-regulated genes only
GO:0019934	cGMP-mediated signaling	12	7	2.11	0.00177	FBgn0010197, FBgn0013973, FBgn0035092, FBgn0038435, FBgn0038436, FBgn0039722, FBgn0259243	Gyc32E, Gycbeta100B, Nplp1, Gyc89Da, Gyc89Db, Capa, Pka-R1	Biological_pathways	Down-regulated genes only
GO:0009190	cyclic nucleotide biosynthetic process	15	8	2.64	0.00178	FBgn0004852, FBgn0010197, FBgn0013973, FBgn0022710, FBgn0024150, FBgn0038435, FBgn0038436, FBgn0053958	Ac76E, Gyc32E, Gycbeta100B, Ac13E, Ac78C, Gyc89Da, Gyc89Db, CG33958	Biological_pathways	Down-regulated genes only
GO:0006096	glycolytic process	15	8	2.64	0.00178	FBgn0000579, FBgn0001091, FBgn0001092, FBgn0003071, FBgn0004647, FBgn0014869, FBgn0086355, FBgn0250906	Eno, Gapdh1, Gapdh2, Pfk, N, Pglym78, Tpi, Pgk	Biological_pathways	Down-regulated genes only
GO:0003008	system process	412	139	72.41	0.00179	FBgn0000036, FBgn0000108, FBgn0000120, FBgn0000241, FBgn0000273, FBgn0000299, FBgn0000500, FBgn0000535, FBgn0000536, FBgn0001134, FBgn0002917, FBgn0002921, FBgn0002940, FBgn0003218, FBgn0003371, FBgn0003380, FBgn0003656, FBgn0003731, FBgn0003861, FBgn0004198, FBgn0004227, FBgn0004244, FBgn0004370, FBgn0004516, FBgn0004595, FBgn0004618, FBgn0004622, FBgn0004638, FBgn0004647, FBgn0004648, FBgn00049…	nAChRalpha1, Appl, Arr1, bw, Pka-C1, Col4a1, Dsk, eag, eas, Grd, na, Atpalpha, ninaE, rdgB, sgg, Sh, sws, Egfr, trp, ct, nonA, Rdl, Ptp10D, Gad1, pros, gl, TkR99D, drk, N, svr, 14-3-3zeta, Ggamma1, Shal, Crys, Nmdar1, Obp19d, Ms, Dop1R1, ine, Mvl, Sap47, Crz, Calx, Rh5, tim, drl, nAChRalpha3, ktub, nrv2, Ork1, klg, Clk, AMPKalpha, Ac78C, sns, Oamb, GluClalpha, Scgdelta, cry, Eaat1, NPF, Amph, CG4…	Biological_pathways	Down-regulated genes only
GO:0046716	muscle cell cellular homeostasis	25	11	4.39	0.00189	FBgn0004606, FBgn0004647, FBgn0010470, FBgn0020618, FBgn0031879, FBgn0034070, FBgn0250906, FBgn0260003, FBgn0261014, FBgn0261458, FBgn0265487	zfh1, N, Fkbp14, Rack1, uif, SP2353, Pgk, Dys, TER94, capt, mbl	Biological_pathways	Down-regulated genes only
GO:0006836	neurotransmitter transport	128	36	22.5	0.00193	FBgn0000241, FBgn0000346, FBgn0004574, FBgn0004636, FBgn0004868, FBgn0005586, FBgn0010348, FBgn0010414, FBgn0010497, FBgn0011288, FBgn0011603, FBgn0026439, FBgn0027575, FBgn0028646, FBgn0029762, FBgn0030897, FBgn0031424, FBgn0031935, FBgn0032895, FBgn0033313, FBgn0033876, FBgn0035969, FBgn0038641, FBgn0039269, FBgn0039915, FBgn0041605, FBgn0053296, FBgn0053547, FBgn0086784, FBgn0250791, FBgn02592…	bw, comt, Rop, Rap1, Gdi, Rab3, Arf79F, SerT, dmGlut, Snap25, ine, Eaat1, GABA-B-R2, aralar1, NAAT1, Frq1, VGlut, CG13793, twit, Cirl, Syngr, CG4476, CG7708, veli, Gat, cpx, CG33296, Rim, stmA, alphaSnap, brp, Dys, lqfR, Ih, Fife, Hsc70-4	Biological_pathways	Down-regulated genes only
GO:0055067	monovalent inorganic cation homeostasis	29	12	5.1	0.00225	FBgn0002921, FBgn0005671, FBgn0015777, FBgn0028670, FBgn0032689, FBgn0032946, FBgn0036279, FBgn0036697, FBgn0040297, FBgn0051547, FBgn0259111, FBgn0263598	Atpalpha, Vha55, nrv2, Vha100-2, CG10413, nrv3, Ncc69, rogdi, Nhe2, NKCC, Ndae1, Vha68-2	Biological_pathways	Down-regulated genes only
GO:0055065	metal ion homeostasis	94	28	16.52	0.00239	FBgn0000500, FBgn0002868, FBgn0002921, FBgn0003861, FBgn0004580, FBgn0004611, FBgn0010399, FBgn0011582, FBgn0011672, FBgn0015622, FBgn0015777, FBgn0024944, FBgn0024957, FBgn0028418, FBgn0028704, FBgn0032116, FBgn0032689, FBgn0032746, FBgn0032946, FBgn0036279, FBgn0037936, FBgn0039722, FBgn0051547, FBgn0053988, FBgn0062440, FBgn0260753, FBgn0261714, FBgn0265194	Dsk, MtnA, Atpalpha, trp, Cbp53E, Plc21C, Nmdar1, Dop1R1, Mvl, Cnx99A, nrv2, Oamb, Irp-1B, Lk, Nckx30C, Mco1, CG10413, CG10470, nrv3, Ncc69, CG6908, Capa, NKCC, Mid1, EMRE, Pdfr, Cpn, Trpm	Biological_pathways	Down-regulated genes only
GO:0006812	cation transport	222	79	39.02	0.0024	FBgn0000036, FBgn0000535, FBgn0002921, FBgn0003380, FBgn0003429, FBgn0003861, FBgn0004611, FBgn0004619, FBgn0005564, FBgn0005671, FBgn0010217, FBgn0010414, FBgn0011211, FBgn0011672, FBgn0013995, FBgn0014391, FBgn0015519, FBgn0015622, FBgn0015777, FBgn0016119, FBgn0016120, FBgn0016691, FBgn0017561, FBgn0019644, FBgn0020235, FBgn0020307, FBgn0022097, FBgn0027556, FBgn0027779, FBgn0028425, FBgn00286…	nAChRalpha1, eag, Atpalpha, Sh, slo, trp, Plc21C, GluRIA, Shal, Vha55, ATPsynbeta, SerT, blw, Mvl, Calx, sun, nAChRalpha3, Cnx99A, nrv2, ATPsynCF6, ATPsynD, ATPsynO, Ork1, ATPsynB, ATPsyngamma, dve, Vha36-1, CG4928, VhaSFD, JhI-21, aralar1, VhaPPA1-1, Vha100-2, Nckx30C, SK, NAAT1, Nha1, Mco1, CG10413, nrv3, sand, CG6329, ATPsynF, Ncc69, Indy, ATP6AP2, Task6, ATPsynE, Zip89B, CG7708, Irk2, Capa, A…	Biological_pathways	Down-regulated genes only
GO:0007601	visual perception	19	9	3.34	0.00265	FBgn0002940, FBgn0003861, FBgn0004227, FBgn0005664, FBgn0014019, FBgn0036260, FBgn0037896, FBgn0085447, FBgn0086367	ninaE, trp, nonA, Crys, Rh5, Rh7, ninaG, sif, t	Biological_pathways	Down-regulated genes only
GO:0006811	ion transport	348	122	61.16	0.00268	FBgn0000036, FBgn0000535, FBgn0001134, FBgn0002917, FBgn0002921, FBgn0003218, FBgn0003380, FBgn0003429, FBgn0003861, FBgn0004244, FBgn0004363, FBgn0004611, FBgn0004619, FBgn0005564, FBgn0005671, FBgn0010217, FBgn0010399, FBgn0010414, FBgn0010497, FBgn0011211, FBgn0011672, FBgn0013953, FBgn0013995, FBgn0014391, FBgn0015519, FBgn0015622, FBgn0015777, FBgn0016119, FBgn0016120, FBgn0016691, FBgn00175…	nAChRalpha1, eag, Grd, na, Atpalpha, rdgB, Sh, slo, trp, Rdl, porin, Plc21C, GluRIA, Shal, Vha55, ATPsynbeta, Nmdar1, SerT, dmGlut, blw, Mvl, Esp, Calx, sun, nAChRalpha3, Cnx99A, nrv2, ATPsynCF6, ATPsynD, ATPsynO, Ork1, ATPsynB, ATPsyngamma, dve, Vha36-1, Picot, GluClalpha, Mpcp2, Eaat1, CG4928, Dic1, VhaSFD, JhI-21, aralar1, VhaPPA1-1, Vha100-2, Nckx30C, NtR, slmo, SK, NAAT1, Clic, CG7536, Pmp70…	Biological_pathways	Down-regulated genes only
GO:0042273	ribosomal large subunit biogenesis	49	17	8.61	0.00296	FBgn0005593, FBgn0013325, FBgn0014026, FBgn0017579, FBgn0020910, FBgn0024733, FBgn0029148, FBgn0029785, FBgn0032050, FBgn0032138, FBgn0032518, FBgn0034968, FBgn0036213, FBgn0036825, FBgn0037328, FBgn0039857, FBgn0064225	RpL7, RpL11, RpL7A, RpL14, RpL3, RpL10, NHP2, RpL35, CG13096, CG4364, RpL24, RpL12, RpL10Ab, RpL26, RpL35A, RpL6, RpL5	Biological_pathways	Down-regulated genes only
GO:0022409	positive regulation of cell-cell adhesion	10	6	1.76	0.00321	FBgn0004449, FBgn0004636, FBgn0262125, FBgn0262126, FBgn0264089, FBgn0267001	Ten-m, Rap1, Sec23, Sec24CD, sli, Ten-a	Biological_pathways	Down-regulated genes only
GO:0043153	entrainment of circadian clock by photoperiod	10	6	1.76	0.00321	FBgn0004611, FBgn0004618, FBgn0014019, FBgn0023178, FBgn0025680, FBgn0036260	Plc21C, gl, Rh5, Pdf, cry, Rh7	Biological_pathways	Down-regulated genes only
GO:0008343	adult feeding behavior	10	6	1.76	0.00321	FBgn0000500, FBgn0032840, FBgn0034636, FBgn0039298, FBgn0050361, FBgn0261953	Dsk, sNPF, twz, to, mtt, TfAP-2	Biological_pathways	Down-regulated genes only
GO:0002121	inter-male aggressive behavior	10	6	1.76	0.00321	FBgn0004244, FBgn0031866, FBgn0034636, FBgn0037976, FBgn0038839, FBgn0261953	Rdl, Nlg2, twz, Tk, Ktl, TfAP-2	Biological_pathways	Down-regulated genes only
GO:0010107	potassium ion import	10	6	1.76	0.00321	FBgn0002921, FBgn0015777, FBgn0032689, FBgn0032946, FBgn0036279, FBgn0051547	Atpalpha, nrv2, CG10413, nrv3, Ncc69, NKCC	Biological_pathways	Down-regulated genes only
GO:0022600	digestive system process	10	6	1.76	0.00321	FBgn0000299, FBgn0011581, FBgn0023169, FBgn0037363, FBgn0037976, FBgn0265598	Col4a1, Ms, AMPKalpha, Atg17, Tk, Bx	Biological_pathways	Down-regulated genes only
GO:0042048	olfactory behavior	63	24	11.07	0.00323	FBgn0000273, FBgn0003371, FBgn0003731, FBgn0003861, FBgn0004244, FBgn0004516, FBgn0004622, FBgn0004638, FBgn0004907, FBgn0010399, FBgn0011582, FBgn0015380, FBgn0016926, FBgn0024944, FBgn0027109, FBgn0027575, FBgn0031515, FBgn0034470, FBgn0034475, FBgn0037408, FBgn0039678, FBgn0041188, FBgn0085434, FBgn0259243	Pka-C1, sgg, Egfr, trp, Rdl, Gad1, TkR99D, drk, 14-3-3zeta, Nmdar1, Dop1R1, drl, Pino, Oamb, NPF, GABA-B-R2, CG9664, Obp56d, Obp56h, NPFR, Obp99a, Atx2, NaCP60E, Pka-R1	Biological_pathways	Down-regulated genes only
GO:0048066	developmental pigmentation	70	22	12.3	0.00326	FBgn0000179, FBgn0000241, FBgn0000504, FBgn0001296, FBgn0002937, FBgn0003116, FBgn0003162, FBgn0003965, FBgn0004870, FBgn0005626, FBgn0015622, FBgn0019643, FBgn0026616, FBgn0037896, FBgn0038947, FBgn0045063, FBgn0086348, FBgn0086367, FBgn0262125, FBgn0262126, FBgn0263986, FBgn0267339	bi, bw, dsx, kar, ninaB, pn, Pu, v, bab1, ple, Cnx99A, AANAT1, alpha-Man-IIb, ninaG, Sar1, fdl, se, t, Sec23, Sec24CD, cd, p38c	Biological_pathways	Down-regulated genes only
GO:0006821	chloride transport	23	10	4.04	0.00338	FBgn0024963, FBgn0030529, FBgn0032689, FBgn0036279, FBgn0038721, FBgn0040238, FBgn0051547, FBgn0259111, FBgn0261444, FBgn0264908	GluClalpha, Clic, CG10413, Ncc69, subdued, Best1, NKCC, Ndae1, CG3638, pHCl-1	Biological_pathways	Down-regulated genes only
GO:0048871	multicellular organismal homeostasis	58	19	10.19	0.00363	FBgn0000120, FBgn0000299, FBgn0002921, FBgn0002938, FBgn0003656, FBgn0003731, FBgn0003861, FBgn0003896, FBgn0003963, FBgn0004618, FBgn0004647, FBgn0011603, FBgn0011726, FBgn0014396, FBgn0015622, FBgn0034718, FBgn0037363, FBgn0260753, FBgn0265434	Arr1, Col4a1, Atpalpha, ninaC, sws, Egfr, trp, tup, ush, gl, N, ine, tsr, tim, Cnx99A, wdp, Atg17, Pdfr, zip	Biological_pathways	Down-regulated genes only
GO:0042133	neurotransmitter metabolic process	27	11	4.75	0.00394	FBgn0000024, FBgn0004516, FBgn0019643, FBgn0027945, FBgn0032287, FBgn0036762, FBgn0036927, FBgn0037153, FBgn0038641, FBgn0039094, FBgn0086367	Ace, Gad1, AANAT1, ppl, CG6415, CG7430, Gabat, olf413, CG7708, CG10184, t	Biological_pathways	Down-regulated genes only
GO:0008344	adult locomotory behavior	71	22	12.48	0.00396	FBgn0000173, FBgn0000500, FBgn0001128, FBgn0002917, FBgn0002921, FBgn0002940, FBgn0004611, FBgn0005558, FBgn0005626, FBgn0010473, FBgn0011581, FBgn0022160, FBgn0026439, FBgn0031866, FBgn0033313, FBgn0034636, FBgn0037976, FBgn0052484, FBgn0085387, FBgn0259246, FBgn0261953, FBgn0263200	ben, Dsk, Gpdh1, na, Atpalpha, ninaE, Plc21C, ey, ple, tutl, Ms, Gpo1, Eaat1, Nlg2, Cirl, twz, Tk, Sk2, shakB, brp, TfAP-2, Galt	Biological_pathways	Down-regulated genes only
GO:0098661	inorganic anion transmembrane transport	20	9	3.52	0.00408	FBgn0024315, FBgn0024963, FBgn0026409, FBgn0027610, FBgn0032689, FBgn0036279, FBgn0051547, FBgn0259111, FBgn0264908	Picot, GluClalpha, Mpcp2, Dic1, CG10413, Ncc69, NKCC, Ndae1, pHCl-1	Biological_pathways	Down-regulated genes only
GO:0007610	behavior	434	140	76.28	0.00415	FBgn0000108, FBgn0000173, FBgn0000273, FBgn0000500, FBgn0000504, FBgn0000535, FBgn0000536, FBgn0000592, FBgn0001128, FBgn0001233, FBgn0002917, FBgn0002921, FBgn0002940, FBgn0003371, FBgn0003380, FBgn0003423, FBgn0003429, FBgn0003731, FBgn0003861, FBgn0003888, FBgn0004227, FBgn0004244, FBgn0004370, FBgn0004516, FBgn0004573, FBgn0004595, FBgn0004611, FBgn0004622, FBgn0004638, FBgn0004646, FBgn00046…	Appl, ben, Pka-C1, Dsk, dsx, eag, eas, Est-6, Gpdh1, Hsp83, na, Atpalpha, ninaE, sgg, Sh, slgA, slo, Egfr, trp, betaTub60D, nonA, Rdl, Ptp10D, Gad1, 5-HT7, pros, Plc21C, TkR99D, drk, ogre, N, svr, 14-3-3zeta, Ggamma1, Mbs, ey, Shal, ple, Nmdar1, tutl, cue, fbl, Ms, Dop1R1, EbpIII, AcCoAS, Dh44, Sap47, Crz, Esp, tim, drl, Pino, Ork1, klg, AANAT1, Rack1, Gpo1, Clk, aay, Pdf, amon, Oamb, cry, Eaat1,…	Biological_pathways	Down-regulated genes only
GO:1901605	alpha-amino acid metabolic process	94	32	16.52	0.00425	FBgn0001098, FBgn0001145, FBgn0003423, FBgn0003965, FBgn0004516, FBgn0005626, FBgn0010497, FBgn0013307, FBgn0014455, FBgn0022774, FBgn0023129, FBgn0023535, FBgn0023537, FBgn0027945, FBgn0030482, FBgn0031860, FBgn0032287, FBgn0034215, FBgn0034390, FBgn0036157, FBgn0036762, FBgn0036927, FBgn0036997, FBgn0037138, FBgn0037955, FBgn0039094, FBgn0039776, FBgn0039877, FBgn0042083, FBgn0261014, FBgn02612…	Gdh, Gs2, slgA, v, Gad1, ple, dmGlut, Odc1, Ahcy, Oat, aay, arg, CG17896, ppl, CG1673, CG11236, CG6415, Mtap, CG15093, CG7560, CG7430, Gabat, CG5955, P5CDh1, Kyat, CG10184, PH4alphaEFB, Mccc1, Mccc2, TER94, SelD, cd	Biological_pathways	Down-regulated genes only
GO:0098659	inorganic cation import across plasma membrane	17	8	2.99	0.00482	FBgn0002921, FBgn0015777, FBgn0032689, FBgn0032946, FBgn0036279, FBgn0040297, FBgn0051547, FBgn0053988	Atpalpha, nrv2, CG10413, nrv3, Ncc69, Nhe2, NKCC, Mid1	Biological_pathways	Down-regulated genes only
GO:0035293	chitin-based larval cuticle pattern formation	17	8	2.99	0.00482	FBgn0003371, FBgn0004396, FBgn0011509, FBgn0016797, FBgn0024509, FBgn0026597, FBgn0038947, FBgn0262125	sgg, CrebA, SrpRbeta, fz2, Sec13, Axn, Sar1, Sec23	Biological_pathways	Down-regulated genes only
GO:0035050	embryonic heart tube development	17	8	2.99	0.00482	FBgn0003896, FBgn0004921, FBgn0013764, FBgn0033438, FBgn0035049, FBgn0038947, FBgn0261800, FBgn0264089	tup, Ggamma1, Chi, Mmp2, Mmp1, Sar1, LanB1, sli	Biological_pathways	Down-regulated genes only
GO:0006101	citrate metabolic process	24	10	4.22	0.00489	FBgn0020236, FBgn0024957, FBgn0027291, FBgn0030612, FBgn0036762, FBgn0037891, FBgn0039112, FBgn0039827, FBgn0261955, FBgn0262559	ATPCL, Irp-1B, Idh3a, CG5599, CG7430, CG5214, SdhD, CG1544, kdn, Mdh2	Biological_pathways	Down-regulated genes only
GO:0019098	reproductive behavior	87	36	15.29	0.00512	FBgn0000504, FBgn0000535, FBgn0000592, FBgn0003380, FBgn0003429, FBgn0004227, FBgn0004573, FBgn0004595, FBgn0005626, FBgn0011695, FBgn0013953, FBgn0014396, FBgn0020618, FBgn0023178, FBgn0024944, FBgn0027109, FBgn0029709, FBgn0030437, FBgn0031866, FBgn0034475, FBgn0034636, FBgn0034638, FBgn0038839, FBgn0038880, FBgn0039298, FBgn0044048, FBgn0044050, FBgn0045866, FBgn0050446, FBgn0052484, FBgn00535…	dsx, eag, Est-6, Sh, slo, nonA, 5-HT7, pros, ple, EbpIII, Esp, tim, Rack1, Pdf, Oamb, NPF, CHOp24, hec, Nlg2, Obp56h, twz, CG10433, Ktl, SIFaR, to, Ilp5, Ilp3, bai, Tdc2, Sk2, SIFa, loj, spin, TfAP-2, Pde1c, mbl	Biological_pathways	Down-regulated genes only
GO:0007476	imaginal disc-derived wing morphogenesis	235	57	41.3	0.00522	FBgn0000179, FBgn0000273, FBgn0000547, FBgn0000711, FBgn0001083, FBgn0001235, FBgn0001319, FBgn0002643, FBgn0002931, FBgn0003090, FBgn0003118, FBgn0003371, FBgn0003463, FBgn0003731, FBgn0004198, FBgn0004607, FBgn0004638, FBgn0004647, FBgn0004648, FBgn0005536, FBgn0010313, FBgn0010470, FBgn0011205, FBgn0011726, FBgn0013764, FBgn0014343, FBgn0014388, FBgn0020251, FBgn0020307, FBgn0020521, FBgn00232…	bi, Pka-C1, ed, flw, fw, hth, kn, mam, net, pk, pnt, sgg, sog, Egfr, ct, zfh2, drk, N, svr, Mbs, corto, Fkbp14, fbl, tsr, Chi, mirr, sty, sfl, dve, pio, EloB, brk, msk, Axn, Hs3st-B, daw, Wnt6, wmd, slow, path, MYPT-75D, Grasp65, ATP6AP2, tnc, Drak, dpy, jing, alphaSnap, pot, zld, Dys, app, magu, dally, cv-d, zip, Bx	Biological_pathways	Down-regulated genes only
GO:0008306	associative learning	48	19	8.44	0.00567	FBgn0000273, FBgn0000536, FBgn0003371, FBgn0003731, FBgn0003861, FBgn0004244, FBgn0004516, FBgn0004638, FBgn0004907, FBgn0005564, FBgn0010399, FBgn0011582, FBgn0013334, FBgn0015380, FBgn0024944, FBgn0039747, FBgn0041188, FBgn0259243, FBgn0263916	Pka-C1, eas, sgg, Egfr, trp, Rdl, Gad1, drk, 14-3-3zeta, Shal, Nmdar1, Dop1R1, Sap47, drl, Oamb, AdoR, Atx2, Pka-R1, Ent2	Biological_pathways	Down-regulated genes only
GO:0007606	sensory perception of chemical stimulus	94	33	16.52	0.00573	FBgn0000120, FBgn0000535, FBgn0003218, FBgn0003380, FBgn0003656, FBgn0004595, FBgn0004622, FBgn0011280, FBgn0011672, FBgn0024150, FBgn0030723, FBgn0031634, FBgn0033065, FBgn0034470, FBgn0034471, FBgn0034475, FBgn0036937, FBgn0037295, FBgn0037908, FBgn0037976, FBgn0037989, FBgn0039678, FBgn0043533, FBgn0046878, FBgn0050052, FBgn0051163, FBgn0052600, FBgn0053202, FBgn0053512, FBgn0085414, FBgn02615…	Arr1, eag, rdgB, Sh, sws, pros, TkR99D, Obp19d, Mvl, Ac78C, dpr18, Ir25a, Cyp6w1, Obp56d, Obp56e, Obp56h, Ir76b, dpr16, dpr5, Tk, ATP8B, Obp99a, Obp56f, Obp83cd, Obp49a, SKIP, dpr8, dpr11, dpr4, dpr12, pdm3, dpr2, Ggamma30A	Biological_pathways	Down-regulated genes only
GO:0046903	secretion	212	52	37.26	0.00588	FBgn0000346, FBgn0004574, FBgn0004636, FBgn0004868, FBgn0005586, FBgn0010348, FBgn0010391, FBgn0011288, FBgn0011726, FBgn0012344, FBgn0015790, FBgn0020907, FBgn0026562, FBgn0027356, FBgn0027575, FBgn0028418, FBgn0028969, FBgn0029709, FBgn0029939, FBgn0030897, FBgn0031294, FBgn0032048, FBgn0032895, FBgn0033313, FBgn0033876, FBgn0034475, FBgn0035695, FBgn0035770, FBgn0036919, FBgn0037015, FBgn00380…	comt, Rop, Rap1, Gdi, Rab3, Arf79F, Gtp-bp, Snap25, tsr, Dh44, Rab11, Scp2, SPARC, Amph, GABA-B-R2, Lk, deltaCOP, CHOp24, CG9650, Frq1, IA-2, Dh31, twit, Cirl, Syngr, Obp56h, CG10226, pst, Grasp65, cmpy, Snx3, Sar1, veli, CG15537, cpx, bai, Rim, Tpst, stmA, alphaSnap, brp, Dys, lqfR, Sec23, Sec24CD, sel, Nha2, Ih, garz, Glut1, Fife, Hsc70-4	Biological_pathways	Down-regulated genes only
GO:0097090	presynaptic membrane organization	11	6	1.93	0.00602	FBgn0004449, FBgn0031866, FBgn0034972, FBgn0083963, FBgn0083975, FBgn0267001	Ten-m, Nlg2, CG10339, Nlg3, Nlg4, Ten-a	Biological_pathways	Down-regulated genes only
GO:0006937	regulation of muscle contraction	11	6	1.93	0.00602	FBgn0000500, FBgn0011581, FBgn0026439, FBgn0027356, FBgn0027556, FBgn0037976	Dsk, Ms, Eaat1, Amph, CG4928, Tk	Biological_pathways	Down-regulated genes only
GO:0006576	cellular biogenic amine metabolic process	21	9	3.69	0.00604	FBgn0000024, FBgn0003965, FBgn0013307, FBgn0019643, FBgn0032482, FBgn0035943, FBgn0037153, FBgn0037723, FBgn0086367	Ace, v, Odc1, AANAT1, Pect, CG5653, olf413, SpdS, t	Biological_pathways	Down-regulated genes only
GO:0031644	regulation of neurological system process	21	9	3.69	0.00604	FBgn0001134, FBgn0004244, FBgn0004622, FBgn0011582, FBgn0024944, FBgn0026439, FBgn0037976, FBgn0040752, FBgn0041188	Grd, Rdl, TkR99D, Dop1R1, Oamb, Eaat1, Tk, Prosap, Atx2	Biological_pathways	Down-regulated genes only
GO:0050805	negative regulation of synaptic transmission	21	9	3.69	0.00604	FBgn0003429, FBgn0004244, FBgn0004622, FBgn0004636, FBgn0027575, FBgn0030941, FBgn0031866, FBgn0041605, FBgn0086677	slo, Rdl, TkR99D, Rap1, GABA-B-R2, wgn, Nlg2, cpx, jeb	Biological_pathways	Down-regulated genes only
GO:0008037	cell recognition	104	36	18.28	0.00616	FBgn0000504, FBgn0001257, FBgn0004055, FBgn0004449, FBgn0005775, FBgn0010114, FBgn0010473, FBgn0013467, FBgn0015380, FBgn0015609, FBgn0015774, FBgn0016797, FBgn0024836, FBgn0031381, FBgn0033159, FBgn0033438, FBgn0033791, FBgn0034718, FBgn0035049, FBgn0035539, FBgn0037835, FBgn0085407, FBgn0085414, FBgn0243514, FBgn0250789, FBgn0250871, FBgn0261046, FBgn0262473, FBgn0262509, FBgn0263934, FBgn02640…	dsx, ImpL2, uzip, Ten-m, Con, hig, tutl, igl, drl, CadN, NetB, fz2, stan, Npc2a, Dscam1, Mmp2, Drl-2, wdp, Mmp1, slow, CG14687, Pvf3, dpr12, eater, alpha-Spec, pot, Dscam3, Tl, nrm, esn, sli, CG44153, Dscam2, Hsc70-4, Ten-a, Mcr	Biological_pathways	Down-regulated genes only
GO:0051259	protein complex oligomerization	40	14	7.03	0.00617	FBgn0000535, FBgn0003071, FBgn0003380, FBgn0003965, FBgn0005564, FBgn0020370, FBgn0032640, FBgn0034636, FBgn0035355, FBgn0038839, FBgn0250791, FBgn0262593, FBgn0265194, FBgn0265434	eag, Pfk, Sh, v, Shal, TppII, Sgt, twz, CG16985, Ktl, alphaSnap, Shab, Trpm, zip	Biological_pathways	Down-regulated genes only
GO:0006865	amino acid transport	40	14	7.03	0.00617	FBgn0010497, FBgn0026439, FBgn0028425, FBgn0028646, FBgn0029762, FBgn0031424, FBgn0035969, FBgn0036007, FBgn0036279, FBgn0038641, FBgn0039915, FBgn0051547, FBgn0261794, FBgn0263397	dmGlut, Eaat1, JhI-21, aralar1, NAAT1, VGlut, CG4476, path, Ncc69, CG7708, Gat, NKCC, kcc, Ih	Biological_pathways	Down-regulated genes only
GO:0008355	olfactory learning	40	14	7.03	0.00617	FBgn0000273, FBgn0003371, FBgn0003731, FBgn0003861, FBgn0004244, FBgn0004516, FBgn0004638, FBgn0004907, FBgn0010399, FBgn0011582, FBgn0015380, FBgn0024944, FBgn0041188, FBgn0259243	Pka-C1, sgg, Egfr, trp, Rdl, Gad1, drk, 14-3-3zeta, Nmdar1, Dop1R1, drl, Oamb, Atx2, Pka-R1	Biological_pathways	Down-regulated genes only
GO:0042330	taxis	308	87	54.13	0.00621	FBgn0000024, FBgn0000504, FBgn0001257, FBgn0002940, FBgn0003090, FBgn0003423, FBgn0003651, FBgn0003888, FBgn0003896, FBgn0004055, FBgn0004198, FBgn0004227, FBgn0004370, FBgn0004449, FBgn0004595, FBgn0004606, FBgn0004647, FBgn0005626, FBgn0005636, FBgn0005775, FBgn0010350, FBgn0010399, FBgn0010452, FBgn0010473, FBgn0011582, FBgn0011661, FBgn0011722, FBgn0013764, FBgn0014019, FBgn0014343, FBgn00143…	Ace, dsx, ImpL2, ninaE, pk, slgA, svp, betaTub60D, tup, uzip, ct, nonA, Ptp10D, Ten-m, pros, zfh1, N, ple, nvy, Con, Cds, Nmdar1, trn, tutl, Dop1R1, Moe, Tig, Chi, Rh5, mirr, tim, drl, CadN, NetB, HDAC1, side, fz2, dom, chb, caps, AMPKalpha, Pdf, stan, cry, gukh, TyrRS, Clic, wgn, erm, daw, Dscam1, Mmp2, Drl-2, unc-5, Toll-7, Toll-6, laza, ATP6AP2, beat-Vc, beat-Va, beat-IIb, beat-IIa, beat-VI, R…	Biological_pathways	Down-regulated genes only
GO:0044057	regulation of system process	59	24	10.37	0.00709	FBgn0000500, FBgn0000535, FBgn0001134, FBgn0004244, FBgn0004622, FBgn0011581, FBgn0011582, FBgn0013767, FBgn0014396, FBgn0017561, FBgn0023076, FBgn0023169, FBgn0024944, FBgn0026439, FBgn0027356, FBgn0027556, FBgn0032336, FBgn0037976, FBgn0039770, FBgn0039938, FBgn0040752, FBgn0041188, FBgn0063485, FBgn0262593	Dsk, eag, Grd, Rdl, TkR99D, Ms, Dop1R1, Crz, tim, Ork1, Clk, AMPKalpha, Oamb, Eaat1, Amph, CG4928, AstC, Tk, CG15537, Sox102F, Prosap, Atx2, Lasp, Shab	Biological_pathways	Down-regulated genes only
GO:0007602	phototransduction	52	22	9.14	0.00712	FBgn0000120, FBgn0002937, FBgn0002938, FBgn0002940, FBgn0003218, FBgn0003861, FBgn0004363, FBgn0004623, FBgn0004646, FBgn0010350, FBgn0013995, FBgn0014019, FBgn0015721, FBgn0025680, FBgn0036260, FBgn0037163, FBgn0085387, FBgn0086704, FBgn0086784, FBgn0265274, FBgn0265959, FBgn0267252	Arr1, ninaB, ninaC, ninaE, rdgB, trp, porin, Gbeta76C, ogre, Cds, Calx, Rh5, ktub, cry, Rh7, laza, shakB, stops, stmA, Inx3, rdgC, Ggamma30A	Biological_pathways	Down-regulated genes only
GO:0042331	phototaxis	18	8	3.16	0.00736	FBgn0000024, FBgn0002940, FBgn0003423, FBgn0003651, FBgn0004227, FBgn0010399, FBgn0014396, FBgn0037671	Ace, ninaE, slgA, svp, nonA, Nmdar1, tim, ATP6AP2	Biological_pathways	Down-regulated genes only
GO:0034333	adherens junction assembly	18	8	3.16	0.00736	FBgn0000163, FBgn0004167, FBgn0004636, FBgn0024189, FBgn0026192, FBgn0027598, FBgn0261873, FBgn0262614	baz, kst, Rap1, sns, par-6, cindr, sdt, pyd	Biological_pathways	Down-regulated genes only
GO:0010033	response to organic substance	414	92	72.76	0.00739	FBgn0000037, FBgn0000273, FBgn0000370, FBgn0000535, FBgn0000659, FBgn0001218, FBgn0001220, FBgn0001257, FBgn0001942, FBgn0003067, FBgn0003071, FBgn0003118, FBgn0003255, FBgn0003371, FBgn0003380, FBgn0003463, FBgn0003651, FBgn0003731, FBgn0004636, FBgn0004638, FBgn0010399, FBgn0010602, FBgn0011582, FBgn0012034, FBgn0012036, FBgn0012344, FBgn0013767, FBgn0014135, FBgn0014388, FBgn0015622, FBgn00156…	mAChR-A, Pka-C1, crc, eag, fkh, Hsc70-3, Hsc70-5, ImpL2, eIF4A, Pepck1, Pfk, pnt, rk, sgg, Sh, sog, svp, Egfr, Rap1, drk, Nmdar1, lwr, Dop1R1, AcCoAS, Aldh, Dh44, Crz, bnl, sty, Cnx99A, Cpr, ktub, Lgr1, klg, sfl, Xbp1, Clk, aay, Ac78C, brk, Sec13, AkhR, Sik2, Agpat2, Clic, Spp, Edem2, Sgt, Mondo, Cyp6w1, Dscam1, sand, Mmp2, Dh44-R2, Obp56d, Obp56h, Chd64, DOR, Gbs-70E, rogdi, Oatp74D, Ir76b, cmpy…	Biological_pathways	Down-regulated genes only
GO:0048520	positive regulation of behavior	29	11	5.1	0.00745	FBgn0003380, FBgn0011204, FBgn0023178, FBgn0024944, FBgn0027348, FBgn0032048, FBgn0038197, FBgn0053527, FBgn0259243, FBgn0262593, FBgn0263397	Sh, cue, Pdf, Oamb, bgm, Dh31, foxo, SIFa, Pka-R1, Shab, Ih	Biological_pathways	Down-regulated genes only
GO:0045475	locomotor rhythm	66	20	11.6	0.0077	FBgn0002917, FBgn0003371, FBgn0005536, FBgn0011205, FBgn0012344, FBgn0014396, FBgn0017561, FBgn0023076, FBgn0023178, FBgn0025680, FBgn0027109, FBgn0035023, FBgn0038197, FBgn0041188, FBgn0044050, FBgn0050446, FBgn0053988, FBgn0260753, FBgn0263397, FBgn0265598	na, sgg, Mbs, fbl, Dh44, tim, Ork1, Clk, Pdf, cry, NPF, ITP, foxo, Atx2, Ilp3, Tdc2, Mid1, Pdfr, Ih, Bx	Biological_pathways	Down-regulated genes only
GO:0007155	cell adhesion	177	56	31.11	0.00793	FBgn0000163, FBgn0000547, FBgn0001083, FBgn0001257, FBgn0003255, FBgn0003731, FBgn0004364, FBgn0004449, FBgn0004636, FBgn0004647, FBgn0004921, FBgn0005775, FBgn0010452, FBgn0010473, FBgn0011722, FBgn0015609, FBgn0015777, FBgn0017590, FBgn0023095, FBgn0024189, FBgn0024836, FBgn0026403, FBgn0026562, FBgn0031850, FBgn0031866, FBgn0034972, FBgn0035049, FBgn0038084, FBgn0038087, FBgn0038494, FBgn00384…	baz, ed, fw, ImpL2, rk, Egfr, 18w, Ten-m, Rap1, N, Ggamma1, Con, trn, tutl, Tig, CadN, nrv2, klg, caps, sns, stan, Ndg, SPARC, Tsp, Nlg2, CG10339, Mmp1, beat-Vc, beat-Va, beat-IIb, beat-IIa, beat-IV, Cad96Cb, beat-VI, Cad99C, Jafrac1, Ccn, Nlg3, Nlg4, eater, beat-VII, Mp, mfas, Dscam3, kug, LanB1, Sec23, Sec24CD, pyd, Src64B, sli, CG44153, Dscam2, Ten-a, LanB2, chp	Biological_pathways	Down-regulated genes only
GO:0042753	positive regulation of circadian rhythm	22	9	3.87	0.00865	FBgn0003380, FBgn0011204, FBgn0023178, FBgn0024944, FBgn0027348, FBgn0032048, FBgn0053527, FBgn0262593, FBgn0263397	Sh, cue, Pdf, Oamb, bgm, Dh31, SIFa, Shab, Ih	Biological_pathways	Down-regulated genes only
GO:0051606	detection of stimulus	78	32	13.71	0.00877	FBgn0000120, FBgn0002937, FBgn0002938, FBgn0002940, FBgn0003218, FBgn0003380, FBgn0003861, FBgn0004363, FBgn0004622, FBgn0004623, FBgn0004646, FBgn0010350, FBgn0013995, FBgn0014019, FBgn0015721, FBgn0024150, FBgn0025680, FBgn0031634, FBgn0033159, FBgn0036150, FBgn0036260, FBgn0036937, FBgn0037163, FBgn0037989, FBgn0038721, FBgn0085387, FBgn0086704, FBgn0086784, FBgn0264953, FBgn0265274, FBgn02659…	Arr1, ninaB, ninaC, ninaE, rdgB, Sh, trp, porin, TkR99D, Gbeta76C, ogre, Cds, Calx, Rh5, ktub, Ac78C, cry, Ir25a, Dscam1, Ir68a, Rh7, Ir76b, laza, ATP8B, subdued, shakB, stops, stmA, Piezo, Inx3, rdgC, Ggamma30A	Biological_pathways	Down-regulated genes only
GO:0034030	ribonucleoside bisphosphate biosynthetic process	15	7	2.64	0.00883	FBgn0011205, FBgn0012034, FBgn0020236, FBgn0020389, FBgn0028325, FBgn0037709, FBgn0039635	fbl, AcCoAS, ATPCL, Papss, Pdha, CG8199, Pdhb	Biological_pathways	Down-regulated genes only
GO:0034033	purine nucleoside bisphosphate biosynthetic process	15	7	2.64	0.00883	FBgn0011205, FBgn0012034, FBgn0020236, FBgn0020389, FBgn0028325, FBgn0037709, FBgn0039635	fbl, AcCoAS, ATPCL, Papss, Pdha, CG8199, Pdhb	Biological_pathways	Down-regulated genes only
GO:0043052	thermotaxis	15	7	2.64	0.00883	FBgn0002940, FBgn0005626, FBgn0010350, FBgn0011582, FBgn0014019, FBgn0037163, FBgn0265959	ninaE, ple, Cds, Dop1R1, Rh5, laza, rdgC	Biological_pathways	Down-regulated genes only
GO:0070887	cellular response to chemical stimulus	341	77	59.93	0.00919	FBgn0000037, FBgn0000273, FBgn0000370, FBgn0000565, FBgn0001218, FBgn0001220, FBgn0001248, FBgn0001257, FBgn0001942, FBgn0002031, FBgn0003067, FBgn0003118, FBgn0003255, FBgn0003371, FBgn0003380, FBgn0003462, FBgn0003463, FBgn0003651, FBgn0003861, FBgn0004636, FBgn0004638, FBgn0010602, FBgn0011582, FBgn0012344, FBgn0013767, FBgn0014135, FBgn0014388, FBgn0015380, FBgn0015622, FBgn0016041, FBgn00166…	mAChR-A, Pka-C1, crc, Eip71CD, Hsc70-3, Hsc70-5, Idh, ImpL2, eIF4A, l(2)37Cc, Pepck1, pnt, rk, sgg, Sh, Sod1, sog, svp, trp, Rap1, drk, lwr, Dop1R1, Dh44, Crz, bnl, sty, drl, Cnx99A, Tom40, Lgr1, sfl, Xbp1, CG2918, brk, Sec13, AkhR, Sik2, TyrRS, Spp, Edem2, Cyp6w1, sand, Mmp2, Sod3, Dh44-R2, Drl-2, eIF1, Chd64, DOR, Pmm2, Oatp74D, Ir76b, cmpy, foxo, Prx3, Prx5, ETHR, SIFaR, CG15537, Jafrac1, Ilp5…	Biological_pathways	Down-regulated genes only
GO:0050954	sensory perception of mechanical stimulus	50	16	8.79	0.00936	FBgn0000241, FBgn0002917, FBgn0002921, FBgn0003861, FBgn0004198, FBgn0004618, FBgn0010399, FBgn0014019, FBgn0015721, FBgn0015777, FBgn0032946, FBgn0033159, FBgn0037217, FBgn0039152, FBgn0053513, FBgn0086704	bw, na, Atpalpha, trp, ct, gl, Nmdar1, Rh5, ktub, nrv2, nrv3, Dscam1, CG14636, Root, Nmdar2, stops	Biological_pathways	Down-regulated genes only
GO:0009063	cellular amino acid catabolic process	52	21	9.14	0.00973	FBgn0001098, FBgn0001145, FBgn0003423, FBgn0003965, FBgn0004516, FBgn0014455, FBgn0022774, FBgn0023535, FBgn0023537, FBgn0027945, FBgn0031860, FBgn0032287, FBgn0034390, FBgn0036762, FBgn0036927, FBgn0036997, FBgn0037138, FBgn0037709, FBgn0039094, FBgn0042083, FBgn0261014	Gdh, Gs2, slgA, v, Gad1, Ahcy, Oat, arg, CG17896, ppl, CG11236, CG6415, CG15093, CG7430, Gabat, CG5955, P5CDh1, CG8199, CG10184, Mccc2, TER94	Biological_pathways	Down-regulated genes only
GO:0072002	Malpighian tubule development	42	14	7.38	0.00996	FBgn0000163, FBgn0000659, FBgn0001235, FBgn0003118, FBgn0003463, FBgn0003651, FBgn0003731, FBgn0004198, FBgn0004647, FBgn0015513, FBgn0016075, FBgn0024250, FBgn0026562, FBgn0265434	baz, fkh, hth, pnt, sog, svp, Egfr, ct, N, mbc, vkg, brk, SPARC, zip	Biological_pathways	Down-regulated genes only
GO:0003013	circulatory system process	38	13	6.68	0.01012	FBgn0000535, FBgn0003731, FBgn0004921, FBgn0011581, FBgn0013767, FBgn0014396, FBgn0017561, FBgn0023076, FBgn0025391, FBgn0032336, FBgn0039938, FBgn0051665, FBgn0262593	eag, Egfr, Ggamma1, Ms, Crz, tim, Ork1, Clk, Scgdelta, AstC, Sox102F, wry, Shab	Biological_pathways	Down-regulated genes only
GO:0003015	heart process	38	13	6.68	0.01012	FBgn0000535, FBgn0003731, FBgn0004921, FBgn0011581, FBgn0013767, FBgn0014396, FBgn0017561, FBgn0023076, FBgn0025391, FBgn0032336, FBgn0039938, FBgn0051665, FBgn0262593	eag, Egfr, Ggamma1, Ms, Crz, tim, Ork1, Clk, Scgdelta, AstC, Sox102F, wry, Shab	Biological_pathways	Down-regulated genes only
GO:0048167	regulation of synaptic plasticity	34	12	5.98	0.01013	FBgn0000346, FBgn0003462, FBgn0004580, FBgn0005586, FBgn0011288, FBgn0013334, FBgn0040752, FBgn0053547, FBgn0259246, FBgn0260003, FBgn0262733, FBgn0264606	comt, Sod1, Cbp53E, Rab3, Snap25, Sap47, Prosap, Rim, brp, Dys, Src64B, Fife	Biological_pathways	Down-regulated genes only
GO:0002790	peptide secretion	72	21	12.65	0.01025	FBgn0005586, FBgn0010391, FBgn0011726, FBgn0027575, FBgn0028969, FBgn0029709, FBgn0029939, FBgn0034475, FBgn0035770, FBgn0036919, FBgn0037015, FBgn0038065, FBgn0038947, FBgn0039770, FBgn0045866, FBgn0086674, FBgn0262126, FBgn0263260, FBgn0263390, FBgn0264560, FBgn0264574	Rab3, Gtp-bp, tsr, GABA-B-R2, deltaCOP, CHOp24, CG9650, Obp56h, pst, Grasp65, cmpy, Snx3, Sar1, CG15537, bai, Tpst, Sec24CD, sel, Nha2, garz, Glut1	Biological_pathways	Down-regulated genes only
GO:0098742	cell-cell adhesion via plasma-membrane adhesion molecules	61	25	10.72	0.01028	FBgn0000163, FBgn0000547, FBgn0001083, FBgn0001257, FBgn0005775, FBgn0010473, FBgn0015609, FBgn0017590, FBgn0023095, FBgn0024189, FBgn0024836, FBgn0038084, FBgn0038087, FBgn0038494, FBgn0038498, FBgn0039089, FBgn0039294, FBgn0039584, FBgn0039709, FBgn0250908, FBgn0261046, FBgn0261574, FBgn0265002, FBgn0265296, FBgn0267435	baz, ed, fw, ImpL2, Con, tutl, CadN, klg, caps, sns, stan, beat-Vc, beat-Va, beat-IIb, beat-IIa, beat-IV, Cad96Cb, beat-VI, Cad99C, beat-VII, Dscam3, kug, CG44153, Dscam2, chp	Biological_pathways	Down-regulated genes only
GO:0032879	regulation of localization	398	96	69.95	0.0106	FBgn0000181, FBgn0000273, FBgn0001257, FBgn0003090, FBgn0003091, FBgn0003162, FBgn0003371, FBgn0003651, FBgn0003731, FBgn0003861, FBgn0004574, FBgn0004595, FBgn0004611, FBgn0004636, FBgn0004638, FBgn0005586, FBgn0005626, FBgn0008635, FBgn0010348, FBgn0010350, FBgn0010391, FBgn0011661, FBgn0011672, FBgn0011726, FBgn0014135, FBgn0014396, FBgn0015513, FBgn0015609, FBgn0015622, FBgn0015774, FBgn00157…	bic, Pka-C1, ImpL2, pk, Pkc53E, Pu, sgg, svp, Egfr, trp, Rop, pros, Plc21C, Rap1, drk, Rab3, ple, betaCOP, Arf79F, Cds, Gtp-bp, Moe, Mvl, tsr, bnl, tim, mbc, CadN, Cnx99A, NetB, Rab11, mael, ArfGAP1, AMPKalpha, stan, CaBP1, beta'COP, alphaCOP, par-6, TyrRS, CG4928, GABA-B-R2, cindr, Atf3, deltaCOP, CG9650, spidey, prtp, Frq1, IA-2, Apoltp, twit, Dscam1, CG6329, ReepB, unc-5, wdp, CG5946, Indy, Gr…	Biological_pathways	Down-regulated genes only
GO:0070593	dendrite self-avoidance	19	8	3.34	0.01079	FBgn0001257, FBgn0010473, FBgn0024836, FBgn0033159, FBgn0261046, FBgn0263934, FBgn0265002, FBgn0265296	ImpL2, tutl, stan, Dscam1, Dscam3, esn, CG44153, Dscam2	Biological_pathways	Down-regulated genes only
GO:0051046	regulation of secretion	68	20	11.95	0.01095	FBgn0004636, FBgn0005586, FBgn0010391, FBgn0011726, FBgn0027575, FBgn0029939, FBgn0030897, FBgn0031294, FBgn0032895, FBgn0037015, FBgn0038065, FBgn0039770, FBgn0041605, FBgn0260003, FBgn0262125, FBgn0262126, FBgn0263260, FBgn0263397, FBgn0264574, FBgn0264606	Rap1, Rab3, Gtp-bp, tsr, GABA-B-R2, CG9650, Frq1, IA-2, twit, cmpy, Snx3, CG15537, cpx, Dys, Sec23, Sec24CD, sel, Ih, Glut1, Fife	Biological_pathways	Down-regulated genes only
GO:0009152	purine ribonucleotide biosynthetic process	73	32	12.83	0.01134	FBgn0000150, FBgn0000579, FBgn0001091, FBgn0001092, FBgn0003071, FBgn0004647, FBgn0004852, FBgn0010217, FBgn0011205, FBgn0011211, FBgn0012034, FBgn0013973, FBgn0014391, FBgn0014869, FBgn0016119, FBgn0016120, FBgn0016691, FBgn0019644, FBgn0020235, FBgn0020236, FBgn0020389, FBgn0024150, FBgn0028325, FBgn0037709, FBgn0038224, FBgn0038435, FBgn0038436, FBgn0039635, FBgn0039830, FBgn0053958, FBgn00863…	awd, Eno, Gapdh1, Gapdh2, Pfk, N, Ac76E, ATPsynbeta, fbl, blw, AcCoAS, Gycbeta100B, sun, Pglym78, ATPsynCF6, ATPsynD, ATPsynO, ATPsynB, ATPsyngamma, ATPCL, Papss, Ac78C, Pdha, CG8199, ATPsynE, Gyc89Da, Gyc89Db, Pdhb, ATPsynC, CG33958, Tpi, Pgk	Biological_pathways	Down-regulated genes only
GO:0048546	digestive tract morphogenesis	47	15	8.26	0.01199	FBgn0000299, FBgn0000659, FBgn0003118, FBgn0003651, FBgn0003731, FBgn0004198, FBgn0004647, FBgn0016075, FBgn0026562, FBgn0027108, FBgn0039257, FBgn0039562, FBgn0261574, FBgn0265434, FBgn0267348	Col4a1, fkh, pnt, svp, Egfr, ct, N, vkg, SPARC, Inx2, tnc, Gp93, kug, zip, LanB2	Biological_pathways	Down-regulated genes only
GO:0006099	tricarboxylic acid cycle	23	9	4.04	0.01204	FBgn0024957, FBgn0027291, FBgn0030612, FBgn0036762, FBgn0037891, FBgn0039112, FBgn0039827, FBgn0261955, FBgn0262559	Irp-1B, Idh3a, CG5599, CG7430, CG5214, SdhD, CG1544, kdn, Mdh2	Biological_pathways	Down-regulated genes only
GO:0060180	female mating behavior	23	9	4.04	0.01204	FBgn0000592, FBgn0004573, FBgn0013953, FBgn0034638, FBgn0044048, FBgn0044050, FBgn0053527, FBgn0086676, FBgn0265487	Est-6, 5-HT7, Esp, CG10433, Ilp5, Ilp3, SIFa, spin, mbl	Biological_pathways	Down-regulated genes only
GO:0070983	dendrite guidance	23	9	4.04	0.01204	FBgn0003896, FBgn0004198, FBgn0004595, FBgn0013764, FBgn0015380, FBgn0015774, FBgn0015805, FBgn0020306, FBgn0036494	tup, ct, pros, Chi, drl, NetB, HDAC1, dom, Toll-6	Biological_pathways	Down-regulated genes only
GO:0051260	protein homooligomerization	27	10	4.75	0.01273	FBgn0003071, FBgn0003380, FBgn0003965, FBgn0005564, FBgn0020370, FBgn0034636, FBgn0035355, FBgn0038839, FBgn0250791, FBgn0262593	Pfk, Sh, v, Shal, TppII, twz, CG16985, Ktl, alphaSnap, Shab	Biological_pathways	Down-regulated genes only
GO:0050906	detection of stimulus involved in sensory perception	27	10	4.75	0.01273	FBgn0003861, FBgn0004622, FBgn0024150, FBgn0025680, FBgn0031634, FBgn0033159, FBgn0036937, FBgn0037989, FBgn0038721, FBgn0265959	trp, TkR99D, Ac78C, cry, Ir25a, Dscam1, Ir76b, ATP8B, subdued, rdgC	Biological_pathways	Down-regulated genes only
GO:0008277	regulation of G protein-coupled receptor signaling pathway	27	10	4.75	0.01273	FBgn0000120, FBgn0002938, FBgn0003218, FBgn0004623, FBgn0014391, FBgn0015721, FBgn0038197, FBgn0052683, FBgn0086704, FBgn0265959	Arr1, ninaC, rdgB, Gbeta76C, sun, ktub, foxo, CG32683, stops, rdgC	Biological_pathways	Down-regulated genes only
GO:0051480	regulation of cytosolic calcium ion concentration	27	10	4.75	0.01273	FBgn0000500, FBgn0003861, FBgn0004580, FBgn0004611, FBgn0011582, FBgn0015622, FBgn0024944, FBgn0028418, FBgn0039722, FBgn0053988	Dsk, trp, Cbp53E, Plc21C, Dop1R1, Cnx99A, Oamb, Lk, Capa, Mid1	Biological_pathways	Down-regulated genes only
GO:0097164	ammonium ion metabolic process	35	12	6.15	0.01301	FBgn0000024, FBgn0003656, FBgn0005626, FBgn0013307, FBgn0019643, FBgn0027095, FBgn0033367, FBgn0035943, FBgn0037153, FBgn0037723, FBgn0038641, FBgn0086367	Ace, sws, ple, Odc1, AANAT1, Manf, PPO2, CG5653, olf413, SpdS, CG7708, t	Biological_pathways	Down-regulated genes only
GO:0019751	polyol metabolic process	35	12	6.15	0.01301	FBgn0003067, FBgn0003141, FBgn0003162, FBgn0004611, FBgn0016672, FBgn0022160, FBgn0025592, FBgn0025885, FBgn0034644, FBgn0035266, FBgn0036262, FBgn0086355	Pepck1, pr, Pu, Plc21C, Ipp, Gpo1, Gk1, Inos, CG10082, Gk2, CG6910, Tpi	Biological_pathways	Down-regulated genes only
GO:0006641	triglyceride metabolic process	31	11	5.45	0.01301	FBgn0000370, FBgn0001128, FBgn0003067, FBgn0010350, FBgn0025592, FBgn0035266, FBgn0038197, FBgn0039114, FBgn0053120, FBgn0261560, FBgn0264494	crc, Gpdh1, Pepck1, Cds, Gk1, Gk2, foxo, Lsd-1, CG33120, Thor, CG17646	Biological_pathways	Down-regulated genes only
GO:0032940	secretion by cell	196	47	34.45	0.01306	FBgn0000346, FBgn0004574, FBgn0004636, FBgn0004868, FBgn0005586, FBgn0010348, FBgn0010391, FBgn0011288, FBgn0011726, FBgn0015790, FBgn0020907, FBgn0026562, FBgn0027356, FBgn0027575, FBgn0028969, FBgn0029709, FBgn0029939, FBgn0030897, FBgn0032895, FBgn0033313, FBgn0033876, FBgn0034475, FBgn0035770, FBgn0036919, FBgn0037015, FBgn0038065, FBgn0038947, FBgn0039269, FBgn0039770, FBgn0041605, FBgn00458…	comt, Rop, Rap1, Gdi, Rab3, Arf79F, Gtp-bp, Snap25, tsr, Rab11, Scp2, SPARC, Amph, GABA-B-R2, deltaCOP, CHOp24, CG9650, Frq1, twit, Cirl, Syngr, Obp56h, pst, Grasp65, cmpy, Snx3, Sar1, veli, CG15537, cpx, bai, Rim, Tpst, stmA, alphaSnap, brp, Dys, lqfR, Sec23, Sec24CD, sel, Nha2, Ih, garz, Glut1, Fife, Hsc70-4	Biological_pathways	Down-regulated genes only
GO:0018991	oviposition	16	7	2.81	0.01335	FBgn0000592, FBgn0020618, FBgn0029709, FBgn0045866, FBgn0050446, FBgn0052484, FBgn0061492	Est-6, Rack1, CHOp24, bai, Tdc2, Sk2, loj	Biological_pathways	Down-regulated genes only
GO:0009593	detection of chemical stimulus	16	7	2.81	0.01335	FBgn0004622, FBgn0024150, FBgn0031634, FBgn0033159, FBgn0036150, FBgn0036937, FBgn0037989	TkR99D, Ac78C, Ir25a, Dscam1, Ir68a, Ir76b, ATP8B	Biological_pathways	Down-regulated genes only
GO:0006935	chemotaxis	259	68	45.52	0.01461	FBgn0000504, FBgn0001257, FBgn0003090, FBgn0003888, FBgn0003896, FBgn0004055, FBgn0004198, FBgn0004370, FBgn0004449, FBgn0004595, FBgn0004606, FBgn0004647, FBgn0005636, FBgn0005775, FBgn0010452, FBgn0010473, FBgn0011661, FBgn0011722, FBgn0013764, FBgn0014343, FBgn0015380, FBgn0015609, FBgn0015774, FBgn0015805, FBgn0016061, FBgn0016797, FBgn0020306, FBgn0021760, FBgn0023095, FBgn0023169, FBgn00248…	dsx, ImpL2, pk, betaTub60D, tup, uzip, ct, Ptp10D, Ten-m, pros, zfh1, N, nvy, Con, trn, tutl, Moe, Tig, Chi, mirr, drl, CadN, NetB, HDAC1, side, fz2, dom, chb, caps, AMPKalpha, stan, gukh, TyrRS, wgn, erm, daw, Dscam1, Mmp2, Drl-2, unc-5, Toll-7, Toll-6, beat-Vc, beat-Va, beat-IIb, beat-IIa, beat-VI, RhoGAP100F, gogo, dpr11, Mical, jing, jeb, alpha-Spec, Mp, Dscam3, capt, haf, pdm3, Tl, Src64B, d…	Biological_pathways	Down-regulated genes only
GO:0006066	alcohol metabolic process	61	18	10.72	0.01481	FBgn0001128, FBgn0003067, FBgn0003141, FBgn0003162, FBgn0004611, FBgn0011693, FBgn0016672, FBgn0019643, FBgn0022160, FBgn0025592, FBgn0025885, FBgn0032482, FBgn0034644, FBgn0035266, FBgn0036262, FBgn0037153, FBgn0038197, FBgn0086355	Gpdh1, Pepck1, pr, Pu, Plc21C, Pdh, Ipp, AANAT1, Gpo1, Gk1, Inos, Pect, CG10082, Gk2, CG6910, olf413, foxo, Tpi	Biological_pathways	Down-regulated genes only
GO:0046660	female sex differentiation	20	8	3.52	0.01527	FBgn0000504, FBgn0000964, FBgn0002576, FBgn0004198, FBgn0004870, FBgn0011726, FBgn0016797, FBgn0025525	dsx, tj, lz, ct, bab1, tsr, fz2, bab2	Biological_pathways	Down-regulated genes only
GO:1902875	regulation of embryonic pattern specification	20	8	3.52	0.01527	FBgn0000181, FBgn0000273, FBgn0004574, FBgn0015790, FBgn0016034, FBgn0063485, FBgn0261014, FBgn0262473	bic, Pka-C1, Rop, Rab11, mael, Lasp, TER94, Tl	Biological_pathways	Down-regulated genes only
GO:0055082	cellular chemical homeostasis	102	27	17.93	0.01549	FBgn0000500, FBgn0002921, FBgn0003067, FBgn0003861, FBgn0004580, FBgn0004611, FBgn0005671, FBgn0010387, FBgn0011582, FBgn0015622, FBgn0015777, FBgn0024944, FBgn0024957, FBgn0028418, FBgn0028670, FBgn0028704, FBgn0032746, FBgn0032946, FBgn0036697, FBgn0039722, FBgn0040238, FBgn0040297, FBgn0053988, FBgn0062440, FBgn0259111, FBgn0261714, FBgn0263598	Dsk, Atpalpha, Pepck1, trp, Cbp53E, Plc21C, Vha55, Acbp2, Dop1R1, Cnx99A, nrv2, Oamb, Irp-1B, Lk, Vha100-2, Nckx30C, CG10470, nrv3, rogdi, Capa, Best1, Nhe2, Mid1, EMRE, Ndae1, Cpn, Vha68-2	Biological_pathways	Down-regulated genes only
GO:0042417	dopamine metabolic process	13	6	2.28	0.01627	FBgn0005626, FBgn0019643, FBgn0027095, FBgn0033367, FBgn0037153, FBgn0086367	ple, AANAT1, Manf, PPO2, olf413, t	Biological_pathways	Down-regulated genes only
GO:0052652	cyclic purine nucleotide metabolic process	13	6	2.28	0.01627	FBgn0004852, FBgn0013973, FBgn0024150, FBgn0038435, FBgn0038436, FBgn0053958	Ac76E, Gycbeta100B, Ac78C, Gyc89Da, Gyc89Db, CG33958	Biological_pathways	Down-regulated genes only
GO:0035296	regulation of tube diameter	13	6	2.28	0.01627	FBgn0002921, FBgn0015777, FBgn0028969, FBgn0039257, FBgn0262126, FBgn0264560	Atpalpha, nrv2, deltaCOP, tnc, Sec24CD, garz	Biological_pathways	Down-regulated genes only
GO:0001941	postsynaptic membrane organization	13	6	2.28	0.01627	FBgn0004449, FBgn0031866, FBgn0034972, FBgn0083963, FBgn0083975, FBgn0267001	Ten-m, Nlg2, CG10339, Nlg3, Nlg4, Ten-a	Biological_pathways	Down-regulated genes only
GO:0015807	L-amino acid transport	13	6	2.28	0.01627	FBgn0010497, FBgn0026439, FBgn0028425, FBgn0028646, FBgn0029762, FBgn0031424	dmGlut, Eaat1, JhI-21, aralar1, NAAT1, VGlut	Biological_pathways	Down-regulated genes only
GO:1903531	negative regulation of secretion by cell	13	6	2.28	0.01627	FBgn0004636, FBgn0027575, FBgn0029939, FBgn0037015, FBgn0039770, FBgn0041605	Rap1, GABA-B-R2, CG9650, cmpy, CG15537, cpx	Biological_pathways	Down-regulated genes only
GO:0051588	regulation of neurotransmitter transport	24	9	4.22	0.01632	FBgn0004636, FBgn0005586, FBgn0027575, FBgn0030897, FBgn0032895, FBgn0041605, FBgn0260003, FBgn0263397, FBgn0264606	Rap1, Rab3, GABA-B-R2, Frq1, twit, cpx, Dys, Ih, Fife	Biological_pathways	Down-regulated genes only
GO:0046928	regulation of neurotransmitter secretion	24	9	4.22	0.01632	FBgn0004636, FBgn0005586, FBgn0027575, FBgn0030897, FBgn0032895, FBgn0041605, FBgn0260003, FBgn0263397, FBgn0264606	Rap1, Rab3, GABA-B-R2, Frq1, twit, cpx, Dys, Ih, Fife	Biological_pathways	Down-regulated genes only
GO:0034620	cellular response to unfolded protein	24	9	4.22	0.01632	FBgn0000370, FBgn0001218, FBgn0001220, FBgn0015622, FBgn0021872, FBgn0031260, FBgn0032480, FBgn0047135, FBgn0266599	crc, Hsc70-3, Hsc70-5, Cnx99A, Xbp1, Spp, Edem2, CG32276, Hsc70-4	Biological_pathways	Down-regulated genes only
GO:1903530	regulation of secretion by cell	66	19	11.6	0.01635	FBgn0004636, FBgn0005586, FBgn0010391, FBgn0011726, FBgn0027575, FBgn0029939, FBgn0030897, FBgn0032895, FBgn0037015, FBgn0038065, FBgn0039770, FBgn0041605, FBgn0260003, FBgn0262125, FBgn0262126, FBgn0263260, FBgn0263397, FBgn0264574, FBgn0264606	Rap1, Rab3, Gtp-bp, tsr, GABA-B-R2, CG9650, Frq1, twit, cmpy, Snx3, CG15537, cpx, Dys, Sec23, Sec24CD, sel, Ih, Glut1, Fife	Biological_pathways	Down-regulated genes only
GO:0016318	ommatidial rotation	28	10	4.92	0.01675	FBgn0000547, FBgn0003118, FBgn0003731, FBgn0014388, FBgn0015609, FBgn0024836, FBgn0026252, FBgn0051774, FBgn0259212, FBgn0265434	ed, pnt, Egfr, sty, CadN, stan, msk, fred, cno, zip	Biological_pathways	Down-regulated genes only
GO:0071310	cellular response to organic substance	254	58	44.64	0.01758	FBgn0000037, FBgn0000273, FBgn0000370, FBgn0001218, FBgn0001220, FBgn0001257, FBgn0001942, FBgn0003067, FBgn0003118, FBgn0003255, FBgn0003371, FBgn0003380, FBgn0003463, FBgn0003651, FBgn0004636, FBgn0004638, FBgn0010602, FBgn0011582, FBgn0012344, FBgn0013767, FBgn0014135, FBgn0014388, FBgn0015622, FBgn0016650, FBgn0020251, FBgn0021872, FBgn0024250, FBgn0024509, FBgn0025595, FBgn0025625, FBgn00312…	mAChR-A, Pka-C1, crc, Hsc70-3, Hsc70-5, ImpL2, eIF4A, Pepck1, pnt, rk, sgg, Sh, sog, svp, Rap1, drk, lwr, Dop1R1, Dh44, Crz, bnl, sty, Cnx99A, Lgr1, sfl, Xbp1, brk, Sec13, AkhR, Sik2, Spp, Edem2, sand, Mmp2, Dh44-R2, Chd64, DOR, Oatp74D, Ir76b, cmpy, foxo, ETHR, SIFaR, CG15537, Ilp5, Ilp3, CG32276, spin, Thor, magu, Tl, Src64B, dally, smt3, cv-d, ttv, Hsc70-4, p38c	Biological_pathways	Down-regulated genes only
GO:0007635	chemosensory behavior	67	27	11.78	0.01824	FBgn0000273, FBgn0003371, FBgn0003380, FBgn0003731, FBgn0003861, FBgn0004244, FBgn0004516, FBgn0004622, FBgn0004638, FBgn0004907, FBgn0004921, FBgn0010399, FBgn0011582, FBgn0015380, FBgn0016926, FBgn0024944, FBgn0027109, FBgn0027575, FBgn0031515, FBgn0034470, FBgn0034475, FBgn0037408, FBgn0039678, FBgn0041188, FBgn0085434, FBgn0259243, FBgn0263397	Pka-C1, sgg, Sh, Egfr, trp, Rdl, Gad1, TkR99D, drk, 14-3-3zeta, Ggamma1, Nmdar1, Dop1R1, drl, Pino, Oamb, NPF, GABA-B-R2, CG9664, Obp56d, Obp56h, NPFR, Obp99a, Atx2, NaCP60E, Pka-R1, Ih	Biological_pathways	Down-regulated genes only
GO:0120036	plasma membrane bounded cell projection organization	497	114	87.35	0.01828	FBgn0000108, FBgn0000163, FBgn0000173, FBgn0000273, FBgn0000504, FBgn0001083, FBgn0001257, FBgn0001319, FBgn0003090, FBgn0003371, FBgn0003380, FBgn0003885, FBgn0003888, FBgn0003896, FBgn0004055, FBgn0004198, FBgn0004370, FBgn0004449, FBgn0004574, FBgn0004595, FBgn0004606, FBgn0004636, FBgn0004647, FBgn0005536, FBgn0005636, FBgn0005775, FBgn0010391, FBgn0010452, FBgn0010473, FBgn0011661, FBgn00117…	Appl, baz, ben, Pka-C1, dsx, fw, ImpL2, kn, pk, sgg, Sh, alphaTub84D, betaTub60D, tup, uzip, ct, Ptp10D, Ten-m, Rop, pros, zfh1, Rap1, N, Mbs, nvy, Con, Gtp-bp, trn, tutl, Moe, Tig, tsr, pnut, Chi, bnl, mirr, drl, CadN, NetB, HDAC1, side, fz2, dom, chb, caps, AMPKalpha, robl, stan, Optix, Rtca, Mipp1, par-6, gukh, Manf, jim, wgn, erm, daw, Ttc30, kon, Dscam1, LRR, Mmp2, Drl-2, unc-5, Toll-7, babo…	Biological_pathways	Down-regulated genes only
GO:0030001	metal ion transport	136	45	23.9	0.01832	FBgn0000535, FBgn0002921, FBgn0003380, FBgn0003429, FBgn0003861, FBgn0004611, FBgn0005564, FBgn0011672, FBgn0013995, FBgn0015622, FBgn0015777, FBgn0017561, FBgn0020307, FBgn0027556, FBgn0028646, FBgn0028704, FBgn0029761, FBgn0029762, FBgn0031865, FBgn0032116, FBgn0032689, FBgn0032946, FBgn0033257, FBgn0033872, FBgn0036279, FBgn0036816, FBgn0038165, FBgn0038412, FBgn0039081, FBgn0039747, FBgn00402…	eag, Atpalpha, Sh, slo, trp, Plc21C, Shal, Mvl, Calx, Cnx99A, nrv2, Ork1, dve, CG4928, aralar1, Nckx30C, SK, NAAT1, Nha1, Mco1, CG10413, nrv3, sand, CG6329, Ncc69, Indy, Task6, Zip89B, Irk2, AdoR, Nhe2, NKCC, Mid1, EMRE, Rgk2, NaCP60E, Sec61alpha, Ndae1, CG42594, Shab, Nha2, Ih, Ent2, Ca-alpha1T, Trpm	Biological_pathways	Down-regulated genes only
GO:0015672	monovalent inorganic cation transport	100	49	17.58	0.01835	FBgn0000535, FBgn0002921, FBgn0003380, FBgn0003429, FBgn0005564, FBgn0005671, FBgn0010217, FBgn0011211, FBgn0014391, FBgn0015777, FBgn0016119, FBgn0016120, FBgn0016691, FBgn0017561, FBgn0019644, FBgn0020235, FBgn0022097, FBgn0027556, FBgn0027779, FBgn0028662, FBgn0028670, FBgn0028704, FBgn0029761, FBgn0029762, FBgn0031865, FBgn0032689, FBgn0032946, FBgn0033257, FBgn0033872, FBgn0035032, FBgn00362…	eag, Atpalpha, Sh, slo, Shal, Vha55, ATPsynbeta, blw, sun, nrv2, ATPsynCF6, ATPsynD, ATPsynO, Ork1, ATPsynB, ATPsyngamma, Vha36-1, CG4928, VhaSFD, VhaPPA1-1, Vha100-2, Nckx30C, SK, NAAT1, Nha1, CG10413, nrv3, sand, CG6329, ATPsynF, Ncc69, Indy, ATP6AP2, Task6, ATPsynE, Irk2, ATPsynC, Nhe2, NKCC, NaCP60E, Ndae1, OtopLc, CG42594, Vha44, Shab, Vha16-1, Nha2, Ih, Vha68-2	Biological_pathways	Down-regulated genes only
GO:0015698	inorganic anion transport	39	18	6.85	0.01871	FBgn0010497, FBgn0013953, FBgn0024315, FBgn0024963, FBgn0026409, FBgn0027610, FBgn0030529, FBgn0030890, FBgn0032689, FBgn0036279, FBgn0038354, FBgn0038721, FBgn0039789, FBgn0040238, FBgn0051547, FBgn0259111, FBgn0261444, FBgn0264908	dmGlut, Esp, Picot, GluClalpha, Mpcp2, Dic1, Clic, CG7536, CG10413, Ncc69, CG5404, subdued, CG9717, Best1, NKCC, Ndae1, CG3638, pHCl-1	Biological_pathways	Down-regulated genes only
GO:0051049	regulation of transport	225	52	39.55	0.01903	FBgn0000273, FBgn0003091, FBgn0003371, FBgn0004636, FBgn0004638, FBgn0005586, FBgn0010348, FBgn0010391, FBgn0011661, FBgn0011672, FBgn0011726, FBgn0014396, FBgn0015622, FBgn0015790, FBgn0020655, FBgn0025678, FBgn0027556, FBgn0027575, FBgn0027598, FBgn0029939, FBgn0030329, FBgn0030897, FBgn0031294, FBgn0032136, FBgn0032895, FBgn0033872, FBgn0033906, FBgn0034718, FBgn0037015, FBgn0038065, FBgn00389…	Pka-C1, Pkc53E, sgg, Rap1, drk, Rab3, Arf79F, Gtp-bp, Moe, Mvl, tsr, tim, Cnx99A, Rab11, ArfGAP1, CaBP1, CG4928, GABA-B-R2, cindr, CG9650, prtp, Frq1, IA-2, Apoltp, twit, CG6329, ReepB, wdp, cmpy, Snx3, Sar1, Cad99C, AdoR, CG15537, Prosap, cpx, LpR2, stg1, Rgk2, Sec61alpha, eater, Dys, sdt, Sec23, Sec24CD, pyd, sel, Ih, Ent2, Slob, Glut1, Fife	Biological_pathways	Down-regulated genes only
GO:0070509	calcium ion import	10	5	1.76	0.01923	FBgn0039747, FBgn0053988, FBgn0062440, FBgn0263916, FBgn0264386	AdoR, Mid1, EMRE, Ent2, Ca-alpha1T	Biological_pathways	Down-regulated genes only
GO:0035158	regulation of tube diameter, open tracheal system	10	5	1.76	0.01923	FBgn0002921, FBgn0015777, FBgn0028969, FBgn0262126, FBgn0264560	Atpalpha, nrv2, deltaCOP, Sec24CD, garz	Biological_pathways	Down-regulated genes only
GO:0050975	sensory perception of touch	10	5	1.76	0.01923	FBgn0002917, FBgn0010399, FBgn0033159, FBgn0039152, FBgn0053513	na, Nmdar1, Dscam1, Root, Nmdar2	Biological_pathways	Down-regulated genes only
GO:0050909	sensory perception of taste	10	5	1.76	0.01923	FBgn0003380, FBgn0004595, FBgn0011672, FBgn0024150, FBgn0267252	Sh, pros, Mvl, Ac78C, Ggamma30A	Biological_pathways	Down-regulated genes only
GO:0002253	activation of immune response	10	5	1.76	0.01923	FBgn0013576, FBgn0033402, FBgn0033438, FBgn0034476, FBgn0262473	mtd, Myd88, Mmp2, Toll-7, Tl	Biological_pathways	Down-regulated genes only
GO:0048065	male courtship behavior, veined wing extension	10	5	1.76	0.01923	FBgn0000504, FBgn0003429, FBgn0004227, FBgn0004573, FBgn0031866	dsx, slo, nonA, 5-HT7, Nlg2	Biological_pathways	Down-regulated genes only
GO:0016545	male courtship behavior, veined wing vibration	10	5	1.76	0.01923	FBgn0000504, FBgn0003429, FBgn0004227, FBgn0004573, FBgn0031866	dsx, slo, nonA, 5-HT7, Nlg2	Biological_pathways	Down-regulated genes only
GO:0007267	cell-cell signaling	400	102	70.3	0.01932	FBgn0000024, FBgn0000036, FBgn0000037, FBgn0000273, FBgn0000346, FBgn0000711, FBgn0001134, FBgn0001319, FBgn0002643, FBgn0002921, FBgn0003371, FBgn0003380, FBgn0003429, FBgn0003462, FBgn0003651, FBgn0004244, FBgn0004449, FBgn0004573, FBgn0004574, FBgn0004580, FBgn0004611, FBgn0004622, FBgn0004636, FBgn0004647, FBgn0004868, FBgn0005564, FBgn0005586, FBgn0010348, FBgn0010399, FBgn0011288, FBgn00115…	Ace, nAChRalpha1, mAChR-A, Pka-C1, comt, flw, Grd, kn, mam, Atpalpha, sgg, Sh, slo, Sod1, svp, Rdl, Ten-m, 5-HT7, Rop, Cbp53E, Plc21C, TkR99D, Rap1, N, Gdi, Shal, Rab3, Arf79F, Nmdar1, Snap25, Dop1R1, Sap47, Gycbeta100B, drl, nAChRalpha3, Ipp, fz2, sfl, Oamb, GluClalpha, Eaat1, Axn, Manf, NPF, GABA-B-R2, NtR, CHOp24, CG9650, Frq1, wgn, nAChRbeta3, VGlut, Nlg2, Wnt6, twit, Cirl, Mmp2, Drl-2, CG632…	Biological_pathways	Down-regulated genes only
GO:0016059	deactivation of rhodopsin mediated signaling	17	7	2.99	0.01932	FBgn0000120, FBgn0002938, FBgn0003218, FBgn0004623, FBgn0015721, FBgn0086704, FBgn0265959	Arr1, ninaC, rdgB, Gbeta76C, ktub, stops, rdgC	Biological_pathways	Down-regulated genes only
GO:0009260	ribonucleotide biosynthetic process	80	33	14.06	0.01957	FBgn0000150, FBgn0000579, FBgn0001091, FBgn0001092, FBgn0003071, FBgn0003257, FBgn0004647, FBgn0004852, FBgn0010217, FBgn0011205, FBgn0011211, FBgn0012034, FBgn0013973, FBgn0014391, FBgn0014869, FBgn0016119, FBgn0016120, FBgn0016691, FBgn0019644, FBgn0020235, FBgn0020236, FBgn0020389, FBgn0024150, FBgn0028325, FBgn0037709, FBgn0038224, FBgn0038435, FBgn0038436, FBgn0039635, FBgn0039830, FBgn00539…	awd, Eno, Gapdh1, Gapdh2, Pfk, r-l, N, Ac76E, ATPsynbeta, fbl, blw, AcCoAS, Gycbeta100B, sun, Pglym78, ATPsynCF6, ATPsynD, ATPsynO, ATPsynB, ATPsyngamma, ATPCL, Papss, Ac78C, Pdha, CG8199, ATPsynE, Gyc89Da, Gyc89Db, Pdhb, ATPsynC, CG33958, Tpi, Pgk	Biological_pathways	Down-regulated genes only
GO:0010817	regulation of hormone levels	54	16	9.49	0.0201	FBgn0000024, FBgn0000592, FBgn0003388, FBgn0010053, FBgn0011693, FBgn0023179, FBgn0027575, FBgn0029939, FBgn0031381, FBgn0032336, FBgn0034475, FBgn0036713, FBgn0038197, FBgn0038641, FBgn0039770, FBgn0264574	Ace, Est-6, shd, Jheh1, Pdh, amon, GABA-B-R2, CG9650, Npc2a, AstC, Obp56h, Mip, foxo, CG7708, CG15537, Glut1	Biological_pathways	Down-regulated genes only
GO:0042067	establishment of ommatidial planar polarity	54	16	9.49	0.0201	FBgn0000547, FBgn0001083, FBgn0003090, FBgn0003118, FBgn0003651, FBgn0003731, FBgn0004647, FBgn0011726, FBgn0014343, FBgn0014388, FBgn0015609, FBgn0024836, FBgn0026252, FBgn0051774, FBgn0259212, FBgn0265434	ed, fw, pk, pnt, svp, Egfr, N, tsr, mirr, sty, CadN, stan, msk, fred, cno, zip	Biological_pathways	Down-regulated genes only
GO:1901606	alpha-amino acid catabolic process	47	19	8.26	0.02057	FBgn0001098, FBgn0001145, FBgn0003423, FBgn0003965, FBgn0004516, FBgn0014455, FBgn0022774, FBgn0023535, FBgn0023537, FBgn0027945, FBgn0031860, FBgn0032287, FBgn0034390, FBgn0036762, FBgn0036997, FBgn0037138, FBgn0039094, FBgn0042083, FBgn0261014	Gdh, Gs2, slgA, v, Gad1, Ahcy, Oat, arg, CG17896, ppl, CG11236, CG6415, CG15093, CG7430, CG5955, P5CDh1, CG10184, Mccc2, TER94	Biological_pathways	Down-regulated genes only
GO:0033500	carbohydrate homeostasis	40	18	7.03	0.0207	FBgn0000579, FBgn0001092, FBgn0003067, FBgn0003071, FBgn0003651, FBgn0004654, FBgn0005558, FBgn0015721, FBgn0020236, FBgn0023179, FBgn0025595, FBgn0029155, FBgn0032940, FBgn0038197, FBgn0044048, FBgn0086355, FBgn0263200, FBgn0264574	Eno, Gapdh2, Pepck1, Pfk, svp, Pgd, ey, ktub, ATPCL, amon, AkhR, Men-b, Mondo, foxo, Ilp5, Tpi, Galt, Glut1	Biological_pathways	Down-regulated genes only
GO:0044719	regulation of imaginal disc-derived wing size	21	8	3.69	0.02096	FBgn0031461, FBgn0031902, FBgn0035539, FBgn0036007, FBgn0036919, FBgn0053196, FBgn0259789, FBgn0262169	daw, Wnt6, slow, path, Grasp65, dpy, zld, magu	Biological_pathways	Down-regulated genes only
GO:0072347	response to anesthetic	21	8	3.69	0.02096	FBgn0000173, FBgn0002917, FBgn0003371, FBgn0023076, FBgn0050446, FBgn0259170, FBgn0265598, FBgn0267252	ben, na, sgg, Clk, Tdc2, alpha-Man-Ia, Bx, Ggamma30A	Biological_pathways	Down-regulated genes only
GO:0003333	amino acid transmembrane transport	33	11	5.8	0.02125	FBgn0026439, FBgn0028425, FBgn0028646, FBgn0029762, FBgn0031424, FBgn0035969, FBgn0036007, FBgn0036279, FBgn0038641, FBgn0051547, FBgn0261794	Eaat1, JhI-21, aralar1, NAAT1, VGlut, CG4476, path, Ncc69, CG7708, NKCC, kcc	Biological_pathways	Down-regulated genes only
GO:0055074	calcium ion homeostasis	50	15	8.79	0.02144	FBgn0000500, FBgn0003861, FBgn0004580, FBgn0004611, FBgn0010399, FBgn0011582, FBgn0015622, FBgn0024944, FBgn0028418, FBgn0028704, FBgn0032746, FBgn0039722, FBgn0053988, FBgn0062440, FBgn0261714	Dsk, trp, Cbp53E, Plc21C, Nmdar1, Dop1R1, Cnx99A, Oamb, Lk, Nckx30C, CG10470, Capa, Mid1, EMRE, Cpn	Biological_pathways	Down-regulated genes only
GO:0001894	tissue homeostasis	50	15	8.79	0.02144	FBgn0000120, FBgn0000299, FBgn0002921, FBgn0002938, FBgn0003656, FBgn0003731, FBgn0003861, FBgn0003896, FBgn0003963, FBgn0004647, FBgn0011726, FBgn0015622, FBgn0034718, FBgn0037363, FBgn0265434	Arr1, Col4a1, Atpalpha, ninaC, sws, Egfr, trp, tup, ush, N, tsr, Cnx99A, wdp, Atg17, zip	Biological_pathways	Down-regulated genes only
GO:0008016	regulation of heart contraction	25	9	4.39	0.02162	FBgn0000535, FBgn0011581, FBgn0013767, FBgn0014396, FBgn0017561, FBgn0023076, FBgn0032336, FBgn0039938, FBgn0262593	eag, Ms, Crz, tim, Ork1, Clk, AstC, Sox102F, Shab	Biological_pathways	Down-regulated genes only
GO:0030004	cellular monovalent inorganic cation homeostasis	25	9	4.39	0.02162	FBgn0002921, FBgn0005671, FBgn0015777, FBgn0028670, FBgn0032946, FBgn0036697, FBgn0040297, FBgn0259111, FBgn0263598	Atpalpha, Vha55, nrv2, Vha100-2, nrv3, rogdi, Nhe2, Ndae1, Vha68-2	Biological_pathways	Down-regulated genes only
GO:1903522	regulation of blood circulation	25	9	4.39	0.02162	FBgn0000535, FBgn0011581, FBgn0013767, FBgn0014396, FBgn0017561, FBgn0023076, FBgn0032336, FBgn0039938, FBgn0262593	eag, Ms, Crz, tim, Ork1, Clk, AstC, Sox102F, Shab	Biological_pathways	Down-regulated genes only
GO:0051090	regulation of DNA-binding transcription factor activity	29	10	5.1	0.02165	FBgn0003118, FBgn0003896, FBgn0003963, FBgn0004595, FBgn0004907, FBgn0010602, FBgn0023214, FBgn0023540, FBgn0038868, FBgn0264922	pnt, tup, ush, pros, 14-3-3zeta, lwr, edl, CG3630, CG5862, smt3	Biological_pathways	Down-regulated genes only
GO:0023061	signal release	124	31	21.79	0.02246	FBgn0000346, FBgn0004574, FBgn0004636, FBgn0004868, FBgn0005586, FBgn0010348, FBgn0011288, FBgn0027575, FBgn0029709, FBgn0029939, FBgn0030897, FBgn0032895, FBgn0033313, FBgn0033876, FBgn0034475, FBgn0037015, FBgn0038065, FBgn0039269, FBgn0039770, FBgn0041605, FBgn0045866, FBgn0053547, FBgn0086784, FBgn0250791, FBgn0259246, FBgn0260003, FBgn0261279, FBgn0263397, FBgn0264574, FBgn0264606, FBgn02665…	comt, Rop, Rap1, Gdi, Rab3, Arf79F, Snap25, GABA-B-R2, CHOp24, CG9650, Frq1, twit, Cirl, Syngr, Obp56h, cmpy, Snx3, veli, CG15537, cpx, bai, Rim, stmA, alphaSnap, brp, Dys, lqfR, Ih, Glut1, Fife, Hsc70-4	Biological_pathways	Down-regulated genes only
GO:0030030	cell projection organization	506	115	88.93	0.02269	FBgn0000108, FBgn0000163, FBgn0000173, FBgn0000273, FBgn0000504, FBgn0001083, FBgn0001257, FBgn0001319, FBgn0003090, FBgn0003371, FBgn0003380, FBgn0003731, FBgn0003885, FBgn0003888, FBgn0003896, FBgn0004055, FBgn0004198, FBgn0004370, FBgn0004449, FBgn0004574, FBgn0004595, FBgn0004606, FBgn0004636, FBgn0004647, FBgn0005536, FBgn0005636, FBgn0005775, FBgn0010391, FBgn0010452, FBgn0010473, FBgn00116…	Appl, baz, ben, Pka-C1, dsx, fw, ImpL2, kn, pk, sgg, Sh, Egfr, alphaTub84D, betaTub60D, tup, uzip, ct, Ptp10D, Ten-m, Rop, pros, zfh1, Rap1, N, Mbs, nvy, Con, Gtp-bp, trn, tutl, Moe, Tig, tsr, pnut, Chi, bnl, mirr, drl, CadN, NetB, HDAC1, side, fz2, dom, chb, caps, AMPKalpha, robl, stan, Optix, Rtca, Mipp1, par-6, gukh, Manf, jim, wgn, erm, daw, Ttc30, kon, Dscam1, LRR, Mmp2, Drl-2, unc-5, Toll-7…	Biological_pathways	Down-regulated genes only
GO:0034220	ion transmembrane transport	209	80	36.73	0.02323	FBgn0000036, FBgn0000535, FBgn0001134, FBgn0002921, FBgn0003380, FBgn0003861, FBgn0004244, FBgn0004363, FBgn0004611, FBgn0005564, FBgn0005671, FBgn0010217, FBgn0011211, FBgn0011672, FBgn0014391, FBgn0015519, FBgn0015777, FBgn0016119, FBgn0016120, FBgn0016691, FBgn0017561, FBgn0019644, FBgn0020235, FBgn0022097, FBgn0024315, FBgn0024963, FBgn0026409, FBgn0026439, FBgn0027610, FBgn0027779, FBgn00284…	nAChRalpha1, eag, Grd, Atpalpha, Sh, trp, Rdl, porin, Plc21C, Shal, Vha55, ATPsynbeta, blw, Mvl, sun, nAChRalpha3, nrv2, ATPsynCF6, ATPsynD, ATPsynO, Ork1, ATPsynB, ATPsyngamma, Vha36-1, Picot, GluClalpha, Mpcp2, Eaat1, Dic1, VhaSFD, JhI-21, aralar1, VhaPPA1-1, Vha100-2, Nckx30C, NtR, SK, NAAT1, nAChRbeta3, VGlut, CG10413, nrv3, sand, CG6329, ATPsynF, CG4476, path, Ncc69, ATP6AP2, CG9396, CG9399,…	Biological_pathways	Down-regulated genes only
GO:0008340	determination of adult lifespan	134	33	23.55	0.02343	FBgn0000565, FBgn0001257, FBgn0002719, FBgn0002921, FBgn0003118, FBgn0003462, FBgn0003731, FBgn0004647, FBgn0014391, FBgn0015805, FBgn0016120, FBgn0025352, FBgn0026439, FBgn0027111, FBgn0027779, FBgn0028479, FBgn0031461, FBgn0032840, FBgn0034877, FBgn0035623, FBgn0036816, FBgn0038197, FBgn0038519, FBgn0038570, FBgn0038880, FBgn0040070, FBgn0040309, FBgn0086355, FBgn0259170, FBgn0261545, FBgn02615…	Eip71CD, ImpL2, Men, Atpalpha, pnt, Sod1, Egfr, N, sun, HDAC1, ATPsynD, Thiolase, Eaat1, miple1, VhaSFD, Mtpalpha, daw, sNPF, levy, mthl2, Indy, foxo, Prx3, Prx5, SIFaR, Trx-2, Jafrac1, Tpi, alpha-Man-Ia, CG42663, Thor, magu, Ih	Biological_pathways	Down-regulated genes only
GO:0098609	cell-cell adhesion	111	40	19.51	0.02345	FBgn0000163, FBgn0000547, FBgn0001083, FBgn0001257, FBgn0003255, FBgn0003731, FBgn0004449, FBgn0004636, FBgn0004647, FBgn0005775, FBgn0010473, FBgn0015609, FBgn0017590, FBgn0023095, FBgn0024189, FBgn0024836, FBgn0031866, FBgn0034972, FBgn0038084, FBgn0038087, FBgn0038494, FBgn0038498, FBgn0039089, FBgn0039294, FBgn0039584, FBgn0039709, FBgn0083963, FBgn0083975, FBgn0250908, FBgn0261046, FBgn02615…	baz, ed, fw, ImpL2, rk, Egfr, Ten-m, Rap1, N, Con, tutl, CadN, klg, caps, sns, stan, Nlg2, CG10339, beat-Vc, beat-Va, beat-IIb, beat-IIa, beat-IV, Cad96Cb, beat-VI, Cad99C, Nlg3, Nlg4, beat-VII, Dscam3, kug, Sec23, Sec24CD, pyd, Src64B, sli, CG44153, Dscam2, Ten-a, chp	Biological_pathways	Down-regulated genes only
GO:0030534	adult behavior	138	42	24.25	0.02394	FBgn0000173, FBgn0000273, FBgn0000500, FBgn0000535, FBgn0001128, FBgn0002917, FBgn0002921, FBgn0002940, FBgn0003380, FBgn0003731, FBgn0004611, FBgn0005558, FBgn0005626, FBgn0010399, FBgn0010473, FBgn0011581, FBgn0012034, FBgn0013767, FBgn0017590, FBgn0022160, FBgn0023076, FBgn0023129, FBgn0026439, FBgn0026718, FBgn0031866, FBgn0032840, FBgn0033313, FBgn0034636, FBgn0036428, FBgn0036697, FBgn00378…	ben, Pka-C1, Dsk, eag, Gpdh1, na, Atpalpha, ninaE, Sh, Egfr, Plc21C, ey, ple, Nmdar1, tutl, Ms, AcCoAS, Crz, klg, Gpo1, Clk, aay, Eaat1, Agpat2, Nlg2, sNPF, Cirl, twz, Gbs-70E, rogdi, CG17734, Tk, to, Gclm, mtt, Tdc2, Sk2, shakB, brp, Tdc1, TfAP-2, Galt	Biological_pathways	Down-regulated genes only
GO:1902476	chloride transmembrane transport	14	6	2.46	0.02432	FBgn0024963, FBgn0032689, FBgn0036279, FBgn0051547, FBgn0259111, FBgn0264908	GluClalpha, CG10413, Ncc69, NKCC, Ndae1, pHCl-1	Biological_pathways	Down-regulated genes only
GO:0051048	negative regulation of secretion	14	6	2.46	0.02432	FBgn0004636, FBgn0027575, FBgn0029939, FBgn0037015, FBgn0039770, FBgn0041605	Rap1, GABA-B-R2, CG9650, cmpy, CG15537, cpx	Biological_pathways	Down-regulated genes only
GO:0006638	neutral lipid metabolic process	38	12	6.68	0.02542	FBgn0000370, FBgn0001128, FBgn0003067, FBgn0010350, FBgn0025592, FBgn0035266, FBgn0038197, FBgn0039114, FBgn0053120, FBgn0085390, FBgn0261560, FBgn0264494	crc, Gpdh1, Pepck1, Cds, Gk1, Gk2, foxo, Lsd-1, CG33120, Dgk, Thor, CG17646	Biological_pathways	Down-regulated genes only
GO:0006639	acylglycerol metabolic process	38	12	6.68	0.02542	FBgn0000370, FBgn0001128, FBgn0003067, FBgn0010350, FBgn0025592, FBgn0035266, FBgn0038197, FBgn0039114, FBgn0053120, FBgn0085390, FBgn0261560, FBgn0264494	crc, Gpdh1, Pepck1, Cds, Gk1, Gk2, foxo, Lsd-1, CG33120, Dgk, Thor, CG17646	Biological_pathways	Down-regulated genes only
GO:0019362	pyridine nucleotide metabolic process	33	15	5.8	0.02633	FBgn0000579, FBgn0001091, FBgn0001092, FBgn0001098, FBgn0001128, FBgn0001248, FBgn0003071, FBgn0004057, FBgn0004647, FBgn0004654, FBgn0014869, FBgn0022160, FBgn0023477, FBgn0086355, FBgn0250906	Eno, Gapdh1, Gapdh2, Gdh, Gpdh1, Idh, Pfk, Zw, N, Pgd, Pglym78, Gpo1, Taldo, Tpi, Pgk	Biological_pathways	Down-regulated genes only
GO:0046496	nicotinamide nucleotide metabolic process	33	15	5.8	0.02633	FBgn0000579, FBgn0001091, FBgn0001092, FBgn0001098, FBgn0001128, FBgn0001248, FBgn0003071, FBgn0004057, FBgn0004647, FBgn0004654, FBgn0014869, FBgn0022160, FBgn0023477, FBgn0086355, FBgn0250906	Eno, Gapdh1, Gapdh2, Gdh, Gpdh1, Idh, Pfk, Zw, N, Pgd, Pglym78, Gpo1, Taldo, Tpi, Pgk	Biological_pathways	Down-regulated genes only
GO:0006873	cellular ion homeostasis	97	25	17.05	0.02661	FBgn0000500, FBgn0002921, FBgn0003861, FBgn0004580, FBgn0004611, FBgn0005671, FBgn0010387, FBgn0011582, FBgn0015622, FBgn0015777, FBgn0024944, FBgn0024957, FBgn0028418, FBgn0028670, FBgn0028704, FBgn0032746, FBgn0032946, FBgn0036697, FBgn0039722, FBgn0040297, FBgn0053988, FBgn0062440, FBgn0259111, FBgn0261714, FBgn0263598	Dsk, Atpalpha, trp, Cbp53E, Plc21C, Vha55, Acbp2, Dop1R1, Cnx99A, nrv2, Oamb, Irp-1B, Lk, Vha100-2, Nckx30C, CG10470, nrv3, rogdi, Capa, Nhe2, Mid1, EMRE, Ndae1, Cpn, Vha68-2	Biological_pathways	Down-regulated genes only
GO:0097485	neuron projection guidance	251	65	44.11	0.02684	FBgn0000504, FBgn0001257, FBgn0003090, FBgn0003888, FBgn0003896, FBgn0004055, FBgn0004198, FBgn0004370, FBgn0004449, FBgn0004595, FBgn0004606, FBgn0004647, FBgn0005636, FBgn0010452, FBgn0010473, FBgn0011661, FBgn0011722, FBgn0013764, FBgn0014343, FBgn0015380, FBgn0015609, FBgn0015774, FBgn0015805, FBgn0016061, FBgn0016797, FBgn0020306, FBgn0021760, FBgn0023095, FBgn0023169, FBgn0024836, FBgn00262…	dsx, ImpL2, pk, betaTub60D, tup, uzip, ct, Ptp10D, Ten-m, pros, zfh1, N, nvy, trn, tutl, Moe, Tig, Chi, mirr, drl, CadN, NetB, HDAC1, side, fz2, dom, chb, caps, AMPKalpha, stan, gukh, wgn, erm, daw, Dscam1, Mmp2, Drl-2, unc-5, Toll-7, Toll-6, beat-Vc, beat-Va, beat-IIb, beat-IIa, beat-VI, RhoGAP100F, gogo, dpr11, Mical, jing, jeb, alpha-Spec, Mp, Dscam3, capt, haf, pdm3, Src64B, dally, sli, CG441…	Biological_pathways	Down-regulated genes only
GO:0022400	regulation of rhodopsin mediated signaling pathway	18	7	3.16	0.02694	FBgn0000120, FBgn0002938, FBgn0003218, FBgn0004623, FBgn0015721, FBgn0086704, FBgn0265959	Arr1, ninaC, rdgB, Gbeta76C, ktub, stops, rdgC	Biological_pathways	Down-regulated genes only
GO:0000027	ribosomal large subunit assembly	18	7	3.16	0.02694	FBgn0013325, FBgn0020910, FBgn0024733, FBgn0032518, FBgn0034968, FBgn0039857, FBgn0064225	RpL11, RpL3, RpL10, RpL24, RpL12, RpL6, RpL5	Biological_pathways	Down-regulated genes only
GO:0007474	imaginal disc-derived wing vein specification	47	14	8.26	0.02737	FBgn0001319, FBgn0002931, FBgn0003463, FBgn0003731, FBgn0004647, FBgn0010313, FBgn0014388, FBgn0020251, FBgn0023212, FBgn0026252, FBgn0031005, FBgn0086655, FBgn0260003, FBgn0265048	kn, net, sog, Egfr, N, corto, sty, sfl, EloB, msk, Hs3st-B, jing, Dys, cv-d	Biological_pathways	Down-regulated genes only
GO:0060047	heart contraction	30	10	5.27	0.0275	FBgn0000535, FBgn0011581, FBgn0013767, FBgn0014396, FBgn0017561, FBgn0023076, FBgn0025391, FBgn0032336, FBgn0039938, FBgn0262593	eag, Ms, Crz, tim, Ork1, Clk, Scgdelta, AstC, Sox102F, Shab	Biological_pathways	Down-regulated genes only
GO:0008015	blood circulation	30	10	5.27	0.0275	FBgn0000535, FBgn0011581, FBgn0013767, FBgn0014396, FBgn0017561, FBgn0023076, FBgn0025391, FBgn0032336, FBgn0039938, FBgn0262593	eag, Ms, Crz, tim, Ork1, Clk, Scgdelta, AstC, Sox102F, Shab	Biological_pathways	Down-regulated genes only
GO:0046390	ribose phosphate biosynthetic process	82	33	14.41	0.02777	FBgn0000150, FBgn0000579, FBgn0001091, FBgn0001092, FBgn0003071, FBgn0003257, FBgn0004647, FBgn0004852, FBgn0010217, FBgn0011205, FBgn0011211, FBgn0012034, FBgn0013973, FBgn0014391, FBgn0014869, FBgn0016119, FBgn0016120, FBgn0016691, FBgn0019644, FBgn0020235, FBgn0020236, FBgn0020389, FBgn0024150, FBgn0028325, FBgn0037709, FBgn0038224, FBgn0038435, FBgn0038436, FBgn0039635, FBgn0039830, FBgn00539…	awd, Eno, Gapdh1, Gapdh2, Pfk, r-l, N, Ac76E, ATPsynbeta, fbl, blw, AcCoAS, Gycbeta100B, sun, Pglym78, ATPsynCF6, ATPsynD, ATPsynO, ATPsynB, ATPsyngamma, ATPCL, Papss, Ac78C, Pdha, CG8199, ATPsynE, Gyc89Da, Gyc89Db, Pdhb, ATPsynC, CG33958, Tpi, Pgk	Biological_pathways	Down-regulated genes only
GO:0007157	heterophilic cell-cell adhesion via plasma membrane cell adhesion molecules	22	8	3.87	0.02799	FBgn0024189, FBgn0038084, FBgn0038087, FBgn0038494, FBgn0038498, FBgn0039089, FBgn0039584, FBgn0250908	sns, beat-Vc, beat-Va, beat-IIb, beat-IIa, beat-IV, beat-VI, beat-VII	Biological_pathways	Down-regulated genes only
GO:0006986	response to unfolded protein	26	9	4.57	0.02805	FBgn0000370, FBgn0001218, FBgn0001220, FBgn0015622, FBgn0021872, FBgn0031260, FBgn0032480, FBgn0047135, FBgn0266599	crc, Hsc70-3, Hsc70-5, Cnx99A, Xbp1, Spp, Edem2, CG32276, Hsc70-4	Biological_pathways	Down-regulated genes only
GO:0031175	neuron projection development	406	95	71.36	0.02972	FBgn0000108, FBgn0000173, FBgn0000273, FBgn0000504, FBgn0001257, FBgn0001319, FBgn0003090, FBgn0003371, FBgn0003380, FBgn0003888, FBgn0003896, FBgn0004055, FBgn0004198, FBgn0004370, FBgn0004449, FBgn0004574, FBgn0004595, FBgn0004606, FBgn0004647, FBgn0005536, FBgn0005636, FBgn0005775, FBgn0010391, FBgn0010452, FBgn0010473, FBgn0011661, FBgn0011722, FBgn0011726, FBgn0013764, FBgn0014343, FBgn00153…	Appl, ben, Pka-C1, dsx, ImpL2, kn, pk, sgg, Sh, betaTub60D, tup, uzip, ct, Ptp10D, Ten-m, Rop, pros, zfh1, N, Mbs, nvy, Con, Gtp-bp, trn, tutl, Moe, Tig, tsr, Chi, mirr, drl, CadN, NetB, HDAC1, side, fz2, dom, chb, caps, AMPKalpha, robl, stan, Optix, Rtca, gukh, Manf, jim, wgn, erm, daw, Dscam1, Mmp2, Drl-2, unc-5, Toll-7, babos, Mmp1, path, Toll-6, ninaG, beat-Vc, beat-Va, foxo, beat-IIb, beat-I…	Biological_pathways	Down-regulated genes only
GO:0022625	cytosolic large ribosomal subunit	50	38	8.71	1.2e-19	FBgn0002579, FBgn0002626, FBgn0003274, FBgn0003279, FBgn0003941, FBgn0005593, FBgn0010078, FBgn0010409, FBgn0011272, FBgn0013325, FBgn0014026, FBgn0015288, FBgn0015756, FBgn0016726, FBgn0017579, FBgn0020910, FBgn0023170, FBgn0024733, FBgn0029785, FBgn0029897, FBgn0030616, FBgn0031980, FBgn0032050, FBgn0032518, FBgn0032987, FBgn0034968, FBgn0035422, FBgn0035753, FBgn0036213, FBgn0036825, FBgn00373…	RpL36, RpL32, RpLP2, RpL4, RpL40, RpL7, RpL23, RpL18A, RpL13, RpL11, RpL7A, RpL22, RpL9, RpL29, RpL14, RpL3, RpL39, RpL10, RpL35, RpL17, RpL37a, RpL36A, CG13096, RpL24, RpL21, RpL12, RpL28, RpL18, RpL10Ab, RpL26, RpL35A, RpL13A, RpL34b, RpL27, RpL6, RpL5, RpL30, RpL8	Cellular_compartment	Down-regulated genes only
GO:0022627	cytosolic small ribosomal subunit	38	28	6.62	3.3e-14	FBgn0002590, FBgn0002622, FBgn0003517, FBgn0003941, FBgn0003942, FBgn0004867, FBgn0005533, FBgn0010265, FBgn0010408, FBgn0010411, FBgn0010412, FBgn0011284, FBgn0015521, FBgn0017545, FBgn0020618, FBgn0030136, FBgn0033699, FBgn0033912, FBgn0034138, FBgn0034743, FBgn0038834, FBgn0039713, FBgn0039757, FBgn0086472, FBgn0261592, FBgn0261596, FBgn0261597, FBgn0261599	RpS5a, RpS3, sta, RpL40, RpS27A, RpS2, RpS17, RpS13, RpS9, RpS18, RpS19a, RpS4, RpS21, RpS3A, Rack1, RpS28b, RpS11, RpS23, RpS15, RpS16, RpS30, RpS8, RpS7, RpS25, RpS6, RpS24, RpS26, RpS29	Cellular_compartment	Down-regulated genes only
GO:0005615	extracellular space	307	103	53.48	1.8e-12	FBgn0000299, FBgn0000500, FBgn0000592, FBgn0001218, FBgn0001257, FBgn0003463, FBgn0004045, FBgn0004047, FBgn0004648, FBgn0005391, FBgn0010452, FBgn0010470, FBgn0011581, FBgn0012344, FBgn0013767, FBgn0014002, FBgn0014135, FBgn0014391, FBgn0016075, FBgn0023178, FBgn0023179, FBgn0023529, FBgn0026061, FBgn0026562, FBgn0027080, FBgn0027095, FBgn0027584, FBgn0027586, FBgn0028374, FBgn0028418, FBgn00303…	Col4a1, Dsk, Est-6, Hsc70-3, ImpL2, sog, Yp1, Yp3, svr, Yp2, trn, Fkbp14, Ms, Dh44, Crz, Pdi, bnl, sun, vkg, Pdf, amon, CG2918, Mipp1, SPARC, TyrRS, Manf, CG4757, CG5867, Hug, Lk, regucalcin, CG5162, Ggt-1, CG3662, Npc2a, eys, daw, obst-E, Wnt6, Dh31, Apoltp, AstC, sNPF, scaf, CG2915, PPO2, Mmp2, Listericin, Sod3, SP2353, Obp56e, Toll-7, CG10433, CG2852, ITP, Mmp1, Ance-5, Phk-3, Nplp1, CNMa, PGR…	Cellular_compartment	Down-regulated genes only
GO:0005887	integral component of plasma membrane	331	110	57.66	3.5e-11	FBgn0000036, FBgn0000037, FBgn0000535, FBgn0000547, FBgn0001134, FBgn0001296, FBgn0002921, FBgn0002940, FBgn0003218, FBgn0003255, FBgn0003380, FBgn0003731, FBgn0003861, FBgn0004244, FBgn0004449, FBgn0004573, FBgn0004619, FBgn0004622, FBgn0004647, FBgn0004852, FBgn0005564, FBgn0010197, FBgn0010399, FBgn0010435, FBgn0010473, FBgn0011582, FBgn0011672, FBgn0013953, FBgn0014019, FBgn0015380, FBgn00154…	nAChRalpha1, mAChR-A, eag, ed, Grd, kar, Atpalpha, ninaE, rdgB, rk, Sh, Egfr, trp, Rdl, Ten-m, 5-HT7, GluRIA, TkR99D, N, Ac76E, Shal, Gyc32E, Nmdar1, emp, tutl, Dop1R1, Mvl, Esp, Rh5, drl, kek2, nAChRalpha3, CadN, nrv2, Lgr1, fz2, Ork1, Ac13E, Ac78C, stan, Oamb, GluClalpha, AkhR, GABA-B-R2, kek3, Nckx30C, NtR, NAAT1, dpr18, wgn, nAChRbeta3, Ir25a, DIP-eta, CG13995, Nlg2, nrv3, Tsp42El, Dscam1, sa…	Cellular_compartment	Down-regulated genes only
GO:0005839	proteasome core complex	13	13	2.26	1.3e-10	FBgn0002284, FBgn0004066, FBgn0010590, FBgn0016697, FBgn0023174, FBgn0023175, FBgn0026380, FBgn0029134, FBgn0032596, FBgn0086134, FBgn0250746, FBgn0250843, FBgn0261394	Prosbeta6, Prosalpha4, Prosbeta1, Prosalpha5, Prosbeta2, Prosalpha7, Prosbeta3, Prosbeta5, Prosbeta4, Prosalpha2, Prosbeta7, Prosalpha6, Prosalpha3	Cellular_compartment	Down-regulated genes only
GO:0005753	mitochondrial proton-transporting ATP synthase complex	15	12	2.61	2e-07	FBgn0010217, FBgn0011211, FBgn0014391, FBgn0016119, FBgn0016120, FBgn0016691, FBgn0019644, FBgn0020235, FBgn0035032, FBgn0038224, FBgn0039830, FBgn0083167	ATPsynbeta, blw, sun, ATPsynCF6, ATPsynD, ATPsynO, ATPsynB, ATPsyngamma, ATPsynF, ATPsynE, ATPsynC, Neb-cGP	Cellular_compartment	Down-regulated genes only
GO:0005886	plasma membrane	932	265	162.35	2.2e-06	FBgn0000024, FBgn0000036, FBgn0000037, FBgn0000108, FBgn0000116, FBgn0000150, FBgn0000163, FBgn0000241, FBgn0000273, FBgn0000535, FBgn0000547, FBgn0000579, FBgn0001134, FBgn0001233, FBgn0001257, FBgn0001296, FBgn0002921, FBgn0002938, FBgn0002940, FBgn0003090, FBgn0003091, FBgn0003218, FBgn0003255, FBgn0003380, FBgn0003429, FBgn0003656, FBgn0003731, FBgn0003861, FBgn0004055, FBgn0004167, FBgn00042…	Ace, nAChRalpha1, mAChR-A, Appl, Argk, awd, baz, bw, Pka-C1, eag, ed, Eno, Grd, Hsp83, ImpL2, kar, Atpalpha, ninaC, ninaE, pk, Pkc53E, rdgB, rk, Sh, slo, sws, Egfr, trp, uzip, kst, Rdl, 18w, Ten-m, 5-HT7, pros, GluRIA, TkR99D, Gbeta76C, Rap1, drk, ogre, N, Ac76E, 14-3-3zeta, Ggamma1, Shal, Rab3, Vha55, Con, Gyc32E, Arf79F, AP-1-2beta, Nmdar1, SerT, emp, tutl, dmGlut, cue, fbl, Snap25, Dop1R1, ine…	Cellular_compartment	Down-regulated genes only
GO:0033178	proton-transporting two-sector ATPase complex, catalytic domain	16	11	2.79	8e-06	FBgn0005671, FBgn0010217, FBgn0011211, FBgn0014391, FBgn0016119, FBgn0016691, FBgn0020235, FBgn0022097, FBgn0027779, FBgn0262511, FBgn0263598	Vha55, ATPsynbeta, blw, sun, ATPsynCF6, ATPsynO, ATPsyngamma, Vha36-1, VhaSFD, Vha44, Vha68-2	Cellular_compartment	Down-regulated genes only
GO:0016021	integral component of membrane	880	239	153.29	1.5e-05	FBgn0000036, FBgn0000037, FBgn0000108, FBgn0000241, FBgn0000370, FBgn0000535, FBgn0000547, FBgn0001134, FBgn0001296, FBgn0002921, FBgn0002940, FBgn0003218, FBgn0003255, FBgn0003380, FBgn0003429, FBgn0003731, FBgn0003861, FBgn0004244, FBgn0004449, FBgn0004573, FBgn0004619, FBgn0004622, FBgn0004646, FBgn0004647, FBgn0004852, FBgn0005564, FBgn0010197, FBgn0010399, FBgn0010414, FBgn0010435, FBgn00104…	nAChRalpha1, mAChR-A, Appl, bw, crc, eag, ed, Grd, kar, Atpalpha, ninaE, rdgB, rk, Sh, slo, Egfr, trp, Rdl, Ten-m, 5-HT7, GluRIA, TkR99D, ogre, N, Ac76E, Shal, Gyc32E, Nmdar1, SerT, emp, tutl, dmGlut, SsRbeta, Dop1R1, Trp1, ine, Mvl, Esp, Calx, Rh5, drl, kek2, nAChRalpha3, CadN, Msr-110, nrv2, Lgr1, fz2, Ork1, Surf4, Orct, Tapdelta, Xbp1, Ac13E, Mct1, Ac78C, Picot, stan, Oamb, GluClalpha, Scgdelt…	Cellular_compartment	Down-regulated genes only
GO:1990204	oxidoreductase complex	66	26	11.5	1.9e-05	FBgn0001128, FBgn0001989, FBgn0011361, FBgn0022160, FBgn0027945, FBgn0028325, FBgn0029888, FBgn0029971, FBgn0030292, FBgn0030612, FBgn0030733, FBgn0031436, FBgn0032287, FBgn0034245, FBgn0034645, FBgn0035046, FBgn0036762, FBgn0037001, FBgn0037709, FBgn0037891, FBgn0038271, FBgn0039112, FBgn0039635, FBgn0039827, FBgn0047038, FBgn0250814	Gpdh1, ND-B17, ND-ACP, Gpo1, ppl, Pdha, ND-ASHI, ND-MNLL, CG11752, CG5599, UQCR-14, ND-B17.2, CG6415, UQCR-6.4, ND-B12, ND-19, CG7430, ND-39, CG8199, CG5214, UQCR-C1, SdhD, Pdhb, CG1544, ND-13B, UQCR-C2	Cellular_compartment	Down-regulated genes only
GO:0005604	basement membrane	17	11	2.96	1.9e-05	FBgn0000299, FBgn0003137, FBgn0011722, FBgn0015774, FBgn0016075, FBgn0026403, FBgn0034070, FBgn0259244, FBgn0260660, FBgn0261800, FBgn0267348	Col4a1, Ppn, Tig, NetB, vkg, Ndg, SP2353, CG42342, Mp, LanB1, LanB2	Cellular_compartment	Down-regulated genes only
GO:0045277	respiratory chain complex IV	10	8	1.74	2.7e-05	FBgn0015031, FBgn0019624, FBgn0031066, FBgn0032833, FBgn0034877, FBgn0040529, FBgn0040773, FBgn0263911	cype, COX5A, COX6B, COX4, levy, COX7A, COX7C, COX8	Cellular_compartment	Down-regulated genes only
GO:0009897	external side of plasma membrane	13	9	2.26	5.2e-05	FBgn0026061, FBgn0027843, FBgn0032116, FBgn0033438, FBgn0034476, FBgn0037671, FBgn0262473, FBgn0262869, FBgn0263930	Mipp1, CAH2, Mco1, Mmp2, Toll-7, ATP6AP2, Tl, Gfrl, dally	Cellular_compartment	Down-regulated genes only
GO:0033177	proton-transporting two-sector ATPase complex, proton-transporting domain	14	9	2.44	0.00012	FBgn0016119, FBgn0016120, FBgn0019644, FBgn0028662, FBgn0028670, FBgn0035032, FBgn0038224, FBgn0039830, FBgn0262736	ATPsynCF6, ATPsynD, ATPsynB, VhaPPA1-1, Vha100-2, ATPsynF, ATPsynE, ATPsynC, Vha16-1	Cellular_compartment	Down-regulated genes only
GO:0033181	plasma membrane proton-transporting V-type ATPase complex	12	8	2.09	0.00021	FBgn0005671, FBgn0022097, FBgn0027779, FBgn0028662, FBgn0028670, FBgn0262511, FBgn0262736, FBgn0263598	Vha55, Vha36-1, VhaSFD, VhaPPA1-1, Vha100-2, Vha44, Vha16-1, Vha68-2	Cellular_compartment	Down-regulated genes only
GO:0034703	cation channel complex	41	17	7.14	0.00025	FBgn0000535, FBgn0003380, FBgn0003861, FBgn0004619, FBgn0005564, FBgn0010399, FBgn0017561, FBgn0031634, FBgn0036937, FBgn0062440, FBgn0064123, FBgn0085434, FBgn0262593, FBgn0263257, FBgn0264000, FBgn0264386, FBgn0265194	eag, Sh, trp, GluRIA, Shal, Nmdar1, Ork1, Ir25a, Ir76b, EMRE, stg1, NaCP60E, Shab, Cngl, GluRIB, Ca-alpha1T, Trpm	Cellular_compartment	Down-regulated genes only
GO:0005746	mitochondrial respiratory chain	60	22	10.45	0.00028	FBgn0001989, FBgn0011361, FBgn0015031, FBgn0019624, FBgn0029888, FBgn0029971, FBgn0030292, FBgn0030733, FBgn0031066, FBgn0031436, FBgn0032833, FBgn0034245, FBgn0034645, FBgn0034877, FBgn0035046, FBgn0037001, FBgn0038271, FBgn0039112, FBgn0040529, FBgn0040773, FBgn0047038, FBgn0250814	ND-B17, ND-ACP, cype, COX5A, ND-ASHI, ND-MNLL, CG11752, UQCR-14, COX6B, ND-B17.2, COX4, UQCR-6.4, ND-B12, levy, ND-19, ND-39, UQCR-C1, SdhD, COX7A, COX7C, ND-13B, UQCR-C2	Cellular_compartment	Down-regulated genes only
GO:0016471	vacuolar proton-transporting V-type ATPase complex	10	7	1.74	0.00035	FBgn0005671, FBgn0022097, FBgn0027779, FBgn0028670, FBgn0037671, FBgn0262511, FBgn0263598	Vha55, Vha36-1, VhaSFD, Vha100-2, ATP6AP2, Vha44, Vha68-2	Cellular_compartment	Down-regulated genes only
GO:0009986	cell surface	48	24	8.36	0.00035	FBgn0000547, FBgn0001233, FBgn0004647, FBgn0005775, FBgn0015737, FBgn0026061, FBgn0027843, FBgn0030941, FBgn0031414, FBgn0031866, FBgn0032116, FBgn0033438, FBgn0034476, FBgn0034972, FBgn0035539, FBgn0037671, FBgn0043791, FBgn0051665, FBgn0083963, FBgn0083975, FBgn0243514, FBgn0262473, FBgn0262869, FBgn0263930	ed, Hsp83, N, Con, Hmu, Mipp1, CAH2, wgn, eys, Nlg2, Mco1, Mmp2, Toll-7, CG10339, slow, ATP6AP2, phu, wry, Nlg3, Nlg4, eater, Tl, Gfrl, dally	Cellular_compartment	Down-regulated genes only
GO:0008328	ionotropic glutamate receptor complex	13	8	2.26	0.00047	FBgn0004619, FBgn0010399, FBgn0031634, FBgn0036937, FBgn0040752, FBgn0053513, FBgn0064123, FBgn0264000	GluRIA, Nmdar1, Ir25a, Ir76b, Prosap, Nmdar2, stg1, GluRIB	Cellular_compartment	Down-regulated genes only
GO:0005791	rough endoplasmic reticulum	11	7	1.92	0.00082	FBgn0002940, FBgn0010391, FBgn0010638, FBgn0014002, FBgn0035771, FBgn0086357, FBgn0261597	ninaE, Gtp-bp, Sec61beta, Pdi, Sec63, Sec61alpha, RpS26	Cellular_compartment	Down-regulated genes only
GO:0043005	neuron projection	279	75	48.6	0.00096	FBgn0000036, FBgn0000037, FBgn0000273, FBgn0000346, FBgn0001134, FBgn0001257, FBgn0002917, FBgn0003371, FBgn0003429, FBgn0004244, FBgn0004370, FBgn0004573, FBgn0004574, FBgn0004580, FBgn0004882, FBgn0005626, FBgn0005775, FBgn0010414, FBgn0010473, FBgn0011288, FBgn0011582, FBgn0015218, FBgn0015380, FBgn0015519, FBgn0015609, FBgn0015774, FBgn0015777, FBgn0015790, FBgn0017590, FBgn0021760, FBgn00231…	nAChRalpha1, mAChR-A, Pka-C1, comt, Grd, ImpL2, na, sgg, slo, Rdl, Ptp10D, 5-HT7, Rop, Cbp53E, orb, ple, Con, SerT, tutl, Snap25, Dop1R1, eIF4E1, drl, nAChRalpha3, CadN, NetB, nrv2, Rab11, klg, chb, Pdf, amon, Oamb, GluClalpha, par-6, gukh, Eaat1, NtR, SK, dpr18, nAChRbeta3, erm, Ir25a, CG13793, sNPF, Dscam1, Mmp2, ReepB, Mmp1, path, Ir76b, dpr5, ATP8B, Gat, Unc-76, Prosap, cpx, mtt, gogo, dpr8, …	Cellular_compartment	Down-regulated genes only
GO:0030120	vesicle coat	28	12	4.88	0.00144	FBgn0008635, FBgn0010380, FBgn0024509, FBgn0025724, FBgn0025725, FBgn0027496, FBgn0028969, FBgn0036211, FBgn0038947, FBgn0262125, FBgn0262126, FBgn0263351	betaCOP, AP-1-2beta, Sec13, beta'COP, alphaCOP, epsilonCOP, deltaCOP, CG5946, Sar1, Sec23, Sec24CD, AP-2mu	Cellular_compartment	Down-regulated genes only
GO:0036477	somatodendritic compartment	134	37	23.34	0.00203	FBgn0000037, FBgn0000273, FBgn0002917, FBgn0003429, FBgn0004244, FBgn0004449, FBgn0004573, FBgn0004580, FBgn0005626, FBgn0010114, FBgn0011582, FBgn0014002, FBgn0015380, FBgn0015609, FBgn0015721, FBgn0015774, FBgn0015790, FBgn0017590, FBgn0023178, FBgn0024733, FBgn0024944, FBgn0029761, FBgn0031375, FBgn0031634, FBgn0032840, FBgn0033159, FBgn0033438, FBgn0035049, FBgn0036007, FBgn0036937, FBgn00379…	mAChR-A, Pka-C1, na, slo, Rdl, Ten-m, 5-HT7, Cbp53E, ple, hig, Dop1R1, Pdi, drl, CadN, ktub, NetB, Rab11, klg, Pdf, RpL10, Oamb, SK, erm, Ir25a, sNPF, Dscam1, Mmp2, Mmp1, path, Ir76b, ATP8B, Prosap, mtt, Pdfr, kcc, Myo10A, Ten-a	Cellular_compartment	Down-regulated genes only
GO:0098797	plasma membrane protein complex	138	48	24.04	0.00217	FBgn0000036, FBgn0000163, FBgn0000535, FBgn0002921, FBgn0002938, FBgn0002940, FBgn0003380, FBgn0003861, FBgn0004619, FBgn0004623, FBgn0004647, FBgn0004921, FBgn0005564, FBgn0005671, FBgn0010380, FBgn0010399, FBgn0011661, FBgn0015519, FBgn0015777, FBgn0022097, FBgn0025391, FBgn0026192, FBgn0027575, FBgn0027779, FBgn0028662, FBgn0028670, FBgn0031261, FBgn0031634, FBgn0031734, FBgn0032946, FBgn00356…	nAChRalpha1, baz, eag, Atpalpha, ninaC, ninaE, Sh, trp, GluRIA, Gbeta76C, N, Ggamma1, Shal, Vha55, AP-1-2beta, Nmdar1, Moe, nAChRalpha3, nrv2, Vha36-1, Scgdelta, par-6, GABA-B-R2, VhaSFD, VhaPPA1-1, Vha100-2, nAChRbeta3, Ir25a, CG11147, nrv3, CG10226, Ir76b, veli, snu, Prosap, Nmdar2, stg1, NaCP60E, Dys, sdt, Vha44, Shab, Vha16-1, AP-2mu, Vha68-2, GluRIB, Ca-alpha1T, Ggamma30A	Cellular_compartment	Down-regulated genes only
GO:0031226	intrinsic component of plasma membrane	344	117	59.92	0.0023	FBgn0000036, FBgn0000037, FBgn0000535, FBgn0000547, FBgn0001134, FBgn0001296, FBgn0002921, FBgn0002940, FBgn0003218, FBgn0003255, FBgn0003380, FBgn0003731, FBgn0003861, FBgn0004244, FBgn0004449, FBgn0004573, FBgn0004619, FBgn0004622, FBgn0004647, FBgn0004852, FBgn0005564, FBgn0010197, FBgn0010399, FBgn0010435, FBgn0010473, FBgn0011582, FBgn0011672, FBgn0013953, FBgn0014019, FBgn0015380, FBgn00154…	nAChRalpha1, mAChR-A, eag, ed, Grd, kar, Atpalpha, ninaE, rdgB, rk, Sh, Egfr, trp, Rdl, Ten-m, 5-HT7, GluRIA, TkR99D, N, Ac76E, Shal, Gyc32E, Nmdar1, emp, tutl, Dop1R1, Mvl, Esp, Rh5, drl, kek2, nAChRalpha3, CadN, nrv2, Lgr1, fz2, Ork1, Ac13E, Ac78C, stan, Oamb, GluClalpha, AkhR, Mipp1, GABA-B-R2, CAH2, kek3, Nckx30C, NtR, NAAT1, dpr18, wgn, nAChRbeta3, Ir25a, DIP-eta, CG13995, Nlg2, Mco1, twit, …	Cellular_compartment	Down-regulated genes only
GO:0016028	rhabdomere	33	13	5.75	0.00232	FBgn0000120, FBgn0002938, FBgn0002940, FBgn0003218, FBgn0003861, FBgn0004623, FBgn0014019, FBgn0015721, FBgn0259210, FBgn0259481, FBgn0260234, FBgn0267252, FBgn0267435	Arr1, ninaC, ninaE, rdgB, trp, Gbeta76C, Rh5, ktub, prom, Mob2, Xport-B, Ggamma30A, chp	Cellular_compartment	Down-regulated genes only
GO:0005576	extracellular region	526	161	91.63	0.00267	FBgn0000108, FBgn0000116, FBgn0000299, FBgn0000500, FBgn0000592, FBgn0001218, FBgn0001257, FBgn0003137, FBgn0003371, FBgn0003463, FBgn0004045, FBgn0004047, FBgn0004449, FBgn0004648, FBgn0004907, FBgn0005391, FBgn0005664, FBgn0010114, FBgn0010452, FBgn0010470, FBgn0011280, FBgn0011581, FBgn0011695, FBgn0011722, FBgn0012344, FBgn0013726, FBgn0013767, FBgn0014002, FBgn0014135, FBgn0014391, FBgn00157…	Appl, Argk, Col4a1, Dsk, Est-6, Hsc70-3, ImpL2, Ppn, sgg, sog, Yp1, Yp3, Ten-m, svr, 14-3-3zeta, Yp2, Crys, hig, trn, Fkbp14, Obp19d, Ms, EbpIII, Tig, Dh44, pnut, Crz, Pdi, bnl, sun, NetB, lama, vkg, chb, Pdf, amon, CG2918, Mipp1, Ndg, SPARC, TyrRS, Manf, NPF, miple1, CG4757, CG5867, GCS2alpha, cindr, Hug, Lk, NimB2, Hml, regucalcin, CG5162, Ggt-1, CG3662, Npc2a, eys, daw, obst-E, Tsp, Wnt6, Dh31…	Cellular_compartment	Down-regulated genes only
GO:0098533	ATPase dependent transmembrane transport complex	10	6	1.74	0.00306	FBgn0002921, FBgn0015777, FBgn0031734, FBgn0032946, FBgn0035695, FBgn0039594	Atpalpha, nrv2, CG11147, nrv3, CG10226, snu	Cellular_compartment	Down-regulated genes only
GO:0098590	plasma membrane region	203	51	35.36	0.00314	FBgn0000036, FBgn0000163, FBgn0002921, FBgn0002938, FBgn0003429, FBgn0003731, FBgn0003861, FBgn0004167, FBgn0004244, FBgn0004449, FBgn0004646, FBgn0010348, FBgn0010399, FBgn0011603, FBgn0011661, FBgn0011672, FBgn0013726, FBgn0015519, FBgn0015790, FBgn0026192, FBgn0026239, FBgn0027108, FBgn0027356, FBgn0027598, FBgn0030723, FBgn0031261, FBgn0031866, FBgn0031879, FBgn0033033, FBgn0037908, FBgn00384…	nAChRalpha1, baz, Atpalpha, ninaC, slo, Egfr, trp, kst, Rdl, Ten-m, ogre, Arf79F, Nmdar1, ine, Moe, Mvl, pnut, nAChRalpha3, Rab11, par-6, gukh, Inx2, Amph, cindr, dpr18, nAChRbeta3, Nlg2, uif, scaf, dpr5, Zip89B, veli, Cad99C, Prosap, dpr8, dpr11, dpr4, stg1, dpr12, alpha-Spec, brp, kug, dpr2, sdt, Tl, pyd, dally, Fife, zip, Ten-a, Mcr	Cellular_compartment	Down-regulated genes only
GO:0045169	fusome	28	11	4.88	0.0051	FBgn0003371, FBgn0014002, FBgn0015790, FBgn0019925, FBgn0021760, FBgn0028327, FBgn0035771, FBgn0086357, FBgn0250789, FBgn0261014, FBgn0262736	sgg, Pdi, Rab11, Surf4, chb, l(1)G0320, Sec63, Sec61alpha, alpha-Spec, TER94, Vha16-1	Cellular_compartment	Down-regulated genes only
GO:0120038	plasma membrane bounded cell projection part	232	56	40.41	0.00512	FBgn0000037, FBgn0000273, FBgn0000346, FBgn0002917, FBgn0002938, FBgn0002940, FBgn0003218, FBgn0003861, FBgn0004244, FBgn0004573, FBgn0004574, FBgn0004580, FBgn0005775, FBgn0010414, FBgn0011288, FBgn0011582, FBgn0015218, FBgn0015380, FBgn0015609, FBgn0015774, FBgn0015790, FBgn0021760, FBgn0024196, FBgn0024944, FBgn0026192, FBgn0026239, FBgn0026439, FBgn0030723, FBgn0031375, FBgn0031634, FBgn00324…	mAChR-A, Pka-C1, comt, na, ninaC, ninaE, rdgB, trp, Rdl, 5-HT7, Rop, Cbp53E, Con, SerT, Snap25, Dop1R1, eIF4E1, drl, CadN, NetB, Rab11, chb, robl, Oamb, par-6, gukh, Eaat1, dpr18, erm, Ir25a, Ttc30, Dscam1, Mmp2, Mmp1, path, Ir76b, dpr5, ATP8B, Root, Cad99C, Prosap, cpx, mtt, gogo, dpr8, dpr11, Mical, dpr4, dpr12, jeb, alphaSnap, prom, Xport-B, pico, dpr2, chp	Cellular_compartment	Down-regulated genes only
GO:0062023	collagen-containing extracellular matrix	25	16	4.35	0.00542	FBgn0000299, FBgn0003137, FBgn0011722, FBgn0015774, FBgn0016075, FBgn0026403, FBgn0026562, FBgn0031850, FBgn0034070, FBgn0035049, FBgn0039257, FBgn0259244, FBgn0260660, FBgn0261800, FBgn0263930, FBgn0267348	Col4a1, Ppn, Tig, NetB, vkg, Ndg, SPARC, Tsp, SP2353, Mmp1, tnc, CG42342, Mp, LanB1, dally, LanB2	Cellular_compartment	Down-regulated genes only
GO:0031225	anchored component of membrane	11	6	1.92	0.00575	FBgn0026061, FBgn0032895, FBgn0039584, FBgn0262869, FBgn0263930, FBgn0267435	Mipp1, twit, beat-VI, Gfrl, dally, chp	Cellular_compartment	Down-regulated genes only
GO:0030424	axon	162	41	28.22	0.00666	FBgn0000346, FBgn0001257, FBgn0002917, FBgn0003371, FBgn0004244, FBgn0004370, FBgn0004574, FBgn0004580, FBgn0005626, FBgn0005775, FBgn0010414, FBgn0010473, FBgn0011288, FBgn0015380, FBgn0015609, FBgn0015774, FBgn0015777, FBgn0015790, FBgn0017590, FBgn0021760, FBgn0026192, FBgn0026239, FBgn0026439, FBgn0031375, FBgn0032840, FBgn0033159, FBgn0033906, FBgn0036007, FBgn0040395, FBgn0040752, FBgn00416…	comt, ImpL2, na, sgg, Rdl, Ptp10D, Rop, Cbp53E, ple, Con, SerT, tutl, Snap25, drl, CadN, NetB, nrv2, Rab11, klg, chb, par-6, gukh, Eaat1, erm, sNPF, Dscam1, ReepB, path, Unc-76, Prosap, cpx, gogo, Mical, jeb, alphaSnap, Dscam3, Cpn, kcc, pyd, CG44153, Dscam2	Cellular_compartment	Down-regulated genes only
GO:0098800	inner mitochondrial membrane protein complex	96	35	16.72	0.00851	FBgn0001989, FBgn0010217, FBgn0011211, FBgn0011361, FBgn0014391, FBgn0015031, FBgn0016119, FBgn0016120, FBgn0016691, FBgn0019624, FBgn0019644, FBgn0020235, FBgn0029888, FBgn0029971, FBgn0030292, FBgn0030733, FBgn0031066, FBgn0031436, FBgn0032833, FBgn0034245, FBgn0034645, FBgn0034877, FBgn0035032, FBgn0035046, FBgn0037001, FBgn0038224, FBgn0038271, FBgn0039112, FBgn0039830, FBgn0040529, FBgn00407…	ND-B17, ATPsynbeta, blw, ND-ACP, sun, cype, ATPsynCF6, ATPsynD, ATPsynO, COX5A, ATPsynB, ATPsyngamma, ND-ASHI, ND-MNLL, CG11752, UQCR-14, COX6B, ND-B17.2, COX4, UQCR-6.4, ND-B12, levy, ATPsynF, ND-19, ND-39, ATPsynE, UQCR-C1, SdhD, ATPsynC, COX7A, COX7C, ND-13B, EMRE, Neb-cGP, UQCR-C2	Cellular_compartment	Down-regulated genes only
GO:0005798	Golgi-associated vesicle	50	16	8.71	0.00858	FBgn0008635, FBgn0015790, FBgn0024509, FBgn0025724, FBgn0025725, FBgn0027496, FBgn0028969, FBgn0029709, FBgn0035909, FBgn0036211, FBgn0036919, FBgn0038947, FBgn0045866, FBgn0061492, FBgn0262125, FBgn0262126	betaCOP, Rab11, Sec13, beta'COP, alphaCOP, epsilonCOP, deltaCOP, CHOp24, ergic53, CG5946, Grasp65, Sar1, bai, loj, Sec23, Sec24CD	Cellular_compartment	Down-regulated genes only
GO:0045202	synapse	249	58	43.38	0.00975	FBgn0000036, FBgn0000346, FBgn0001134, FBgn0002917, FBgn0003371, FBgn0003429, FBgn0004244, FBgn0004449, FBgn0004574, FBgn0004580, FBgn0004868, FBgn0004882, FBgn0005586, FBgn0005775, FBgn0010114, FBgn0010399, FBgn0010414, FBgn0011288, FBgn0013334, FBgn0013973, FBgn0015218, FBgn0015519, FBgn0015790, FBgn0023175, FBgn0024963, FBgn0026192, FBgn0026239, FBgn0026439, FBgn0027356, FBgn0028686, FBgn00291…	nAChRalpha1, comt, Grd, na, sgg, slo, Rdl, Ten-m, Rop, Cbp53E, Gdi, orb, Rab3, Con, hig, Nmdar1, SerT, Snap25, Sap47, Gycbeta100B, eIF4E1, nAChRalpha3, Rab11, Prosalpha7, GluClalpha, par-6, gukh, Eaat1, Amph, Rpt3, NtR, nAChRbeta3, VGlut, Nlg2, Hasp, Cirl, Syngr, CG10339, RabX5, veli, RhoGAP100F, Prosap, cpx, Mical, Rim, stg1, Nlg3, Nlg4, sif, jeb, stmA, alpha-Spec, alphaSnap, brp, Dys, Rbp, Fife…	Cellular_compartment	Down-regulated genes only
GO:0030660	Golgi-associated vesicle membrane	27	10	4.7	0.01196	FBgn0008635, FBgn0024509, FBgn0025724, FBgn0025725, FBgn0027496, FBgn0028969, FBgn0036211, FBgn0038947, FBgn0262125, FBgn0262126	betaCOP, Sec13, beta'COP, alphaCOP, epsilonCOP, deltaCOP, CG5946, Sar1, Sec23, Sec24CD	Cellular_compartment	Down-regulated genes only
GO:0000502	proteasome complex	41	23	7.14	0.01479	FBgn0002284, FBgn0004066, FBgn0010590, FBgn0015282, FBgn0015283, FBgn0016697, FBgn0023174, FBgn0023175, FBgn0026380, FBgn0028686, FBgn0028688, FBgn0028690, FBgn0028695, FBgn0029134, FBgn0032596, FBgn0032884, FBgn0033886, FBgn0086134, FBgn0250746, FBgn0250843, FBgn0261014, FBgn0261394, FBgn0261396	Prosbeta6, Prosalpha4, Prosbeta1, Rpt2, Rpn10, Prosalpha5, Prosbeta2, Prosalpha7, Prosbeta3, Rpt3, Rpn7, Rpn5, Rpn1, Prosbeta5, Prosbeta4, Pomp, Rpn13, Prosalpha2, Prosbeta7, Prosalpha6, TER94, Prosalpha3, Rpn3	Cellular_compartment	Down-regulated genes only
GO:1905369	endopeptidase complex	41	23	7.14	0.01479	FBgn0002284, FBgn0004066, FBgn0010590, FBgn0015282, FBgn0015283, FBgn0016697, FBgn0023174, FBgn0023175, FBgn0026380, FBgn0028686, FBgn0028688, FBgn0028690, FBgn0028695, FBgn0029134, FBgn0032596, FBgn0032884, FBgn0033886, FBgn0086134, FBgn0250746, FBgn0250843, FBgn0261014, FBgn0261394, FBgn0261396	Prosbeta6, Prosalpha4, Prosbeta1, Rpt2, Rpn10, Prosalpha5, Prosbeta2, Prosalpha7, Prosbeta3, Rpt3, Rpn7, Rpn5, Rpn1, Prosbeta5, Prosbeta4, Pomp, Rpn13, Prosalpha2, Prosbeta7, Prosalpha6, TER94, Prosalpha3, Rpn3	Cellular_compartment	Down-regulated genes only
GO:0046658	anchored component of plasma membrane	10	5	1.74	0.01853	FBgn0026061, FBgn0032895, FBgn0262869, FBgn0263930, FBgn0267435	Mipp1, twit, Gfrl, dally, chp	Cellular_compartment	Down-regulated genes only
GO:0045239	tricarboxylic acid cycle enzyme complex	10	5	1.74	0.01853	FBgn0030612, FBgn0036762, FBgn0037709, FBgn0037891, FBgn0039827	CG5599, CG7430, CG8199, CG5214, CG1544	Cellular_compartment	Down-regulated genes only
GO:0098803	respiratory chain complex	60	23	10.45	0.01894	FBgn0001989, FBgn0011361, FBgn0015031, FBgn0019624, FBgn0029888, FBgn0029971, FBgn0030292, FBgn0030733, FBgn0031066, FBgn0031436, FBgn0032833, FBgn0034245, FBgn0034645, FBgn0034877, FBgn0035046, FBgn0037001, FBgn0038271, FBgn0039112, FBgn0040529, FBgn0040773, FBgn0047038, FBgn0250814, FBgn0263911	ND-B17, ND-ACP, cype, COX5A, ND-ASHI, ND-MNLL, CG11752, UQCR-14, COX6B, ND-B17.2, COX4, UQCR-6.4, ND-B12, levy, ND-19, ND-39, UQCR-C1, SdhD, COX7A, COX7C, ND-13B, UQCR-C2, COX8	Cellular_compartment	Down-regulated genes only
GO:0005838	proteasome regulatory particle	21	8	3.66	0.01991	FBgn0015282, FBgn0015283, FBgn0028686, FBgn0028688, FBgn0028690, FBgn0028695, FBgn0033886, FBgn0261396	Rpt2, Rpn10, Rpt3, Rpn7, Rpn5, Rpn1, Rpn13, Rpn3	Cellular_compartment	Down-regulated genes only
GO:0044297	cell body	91	24	15.85	0.0204	FBgn0000273, FBgn0002917, FBgn0003429, FBgn0004244, FBgn0004449, FBgn0005626, FBgn0010114, FBgn0014002, FBgn0015721, FBgn0015774, FBgn0015790, FBgn0017590, FBgn0023178, FBgn0024733, FBgn0029761, FBgn0031375, FBgn0032840, FBgn0033159, FBgn0036007, FBgn0260753, FBgn0261714, FBgn0261794, FBgn0263705, FBgn0267001	Pka-C1, na, slo, Rdl, Ten-m, ple, hig, Pdi, ktub, NetB, Rab11, klg, Pdf, RpL10, SK, erm, sNPF, Dscam1, path, Pdfr, Cpn, kcc, Myo10A, Ten-a	Cellular_compartment	Down-regulated genes only
GO:0048786	presynaptic active zone	25	9	4.35	0.02046	FBgn0005586, FBgn0013973, FBgn0039883, FBgn0041605, FBgn0053547, FBgn0259246, FBgn0262483, FBgn0264606, FBgn0267001	Rab3, Gycbeta100B, RhoGAP100F, cpx, Rim, brp, Rbp, Fife, Ten-a	Cellular_compartment	Down-regulated genes only
GO:0035003	subapical complex	14	6	2.44	0.02333	FBgn0000163, FBgn0004647, FBgn0011661, FBgn0026192, FBgn0039269, FBgn0261873	baz, N, Moe, par-6, veli, sdt	Cellular_compartment	Down-regulated genes only
GO:0005829	cytosol	671	180	116.89	0.02386	FBgn0000116, FBgn0000181, FBgn0000273, FBgn0000579, FBgn0001091, FBgn0001092, FBgn0001098, FBgn0001128, FBgn0001233, FBgn0001235, FBgn0001248, FBgn0001942, FBgn0002579, FBgn0002590, FBgn0002622, FBgn0002626, FBgn0002719, FBgn0003067, FBgn0003071, FBgn0003274, FBgn0003279, FBgn0003371, FBgn0003462, FBgn0003517, FBgn0003941, FBgn0003942, FBgn0004432, FBgn0004516, FBgn0004574, FBgn0004580, FBgn00046…	Argk, bic, Pka-C1, Eno, Gapdh1, Gapdh2, Gdh, Gpdh1, Hsp83, hth, Idh, eIF4A, RpL36, RpS5a, RpS3, RpL32, Men, Pepck1, Pfk, RpLP2, RpL4, sgg, Sod1, sta, RpL40, RpS27A, Cyp1, Gad1, Rop, Cbp53E, Pgd, RpS2, Gdi, RpS17, RpL7, Vha55, RpL23, RpS13, RpS9, RpL18A, RpS18, RpS19a, CCT5, Srp54k, fbl, RpL13, RpS4, Snap25, Moe, tsr, RpL11, Gycbeta100B, RpL7A, Oda, sty, tim, Ahcy, eIF4E1, Hsp60A, Rpn10, RpL22, Rp…	Cellular_compartment	Down-regulated genes only
GO:0043025	neuronal cell body	83	22	14.46	0.0243	FBgn0002917, FBgn0003429, FBgn0004244, FBgn0004449, FBgn0005626, FBgn0010114, FBgn0014002, FBgn0015721, FBgn0015774, FBgn0015790, FBgn0017590, FBgn0023178, FBgn0024733, FBgn0029761, FBgn0031375, FBgn0032840, FBgn0033159, FBgn0036007, FBgn0260753, FBgn0261794, FBgn0263705, FBgn0267001	na, slo, Rdl, Ten-m, ple, hig, Pdi, ktub, NetB, Rab11, klg, Pdf, RpL10, SK, erm, sNPF, Dscam1, path, Pdfr, kcc, Myo10A, Ten-a	Cellular_compartment	Down-regulated genes only
GO:0016020	membrane	1881	479	327.67	0.02513	FBgn0000024, FBgn0000036, FBgn0000037, FBgn0000084, FBgn0000108, FBgn0000116, FBgn0000150, FBgn0000163, FBgn0000241, FBgn0000273, FBgn0000370, FBgn0000535, FBgn0000547, FBgn0000579, FBgn0001134, FBgn0001218, FBgn0001233, FBgn0001257, FBgn0001296, FBgn0001989, FBgn0002031, FBgn0002917, FBgn0002921, FBgn0002938, FBgn0002940, FBgn0003090, FBgn0003091, FBgn0003218, FBgn0003255, FBgn0003380, FBgn00034…	Ace, nAChRalpha1, mAChR-A, AnxB10, Appl, Argk, awd, baz, bw, Pka-C1, crc, eag, ed, Eno, Grd, Hsc70-3, Hsp83, ImpL2, kar, ND-B17, l(2)37Cc, na, Atpalpha, ninaC, ninaE, pk, Pkc53E, rdgB, rk, Sh, slo, sws, Egfr, trp, uzip, kst, ct, Rdl, porin, 18w, Ten-m, 5-HT7, Rop, pros, GluRIA, TkR99D, Gbeta76C, Rap1, drk, ogre, N, Ac76E, 14-3-3zeta, Ggamma1, Shal, Rab3, Vha55, Con, betaCOP, Gyc32E, ATPsynbeta, A…	Cellular_compartment	Down-regulated genes only
GO:0031672	A band	18	7	3.14	0.02573	FBgn0001091, FBgn0001128, FBgn0014869, FBgn0063485, FBgn0086355, FBgn0250906, FBgn0265487	Gapdh1, Gpdh1, Pglym78, Lasp, Tpi, Pgk, mbl	Cellular_compartment	Down-regulated genes only
GO:0022624	proteasome accessory complex	22	8	3.83	0.02663	FBgn0015282, FBgn0015283, FBgn0028686, FBgn0028688, FBgn0028690, FBgn0028695, FBgn0033886, FBgn0261396	Rpt2, Rpn10, Rpt3, Rpn7, Rpn5, Rpn1, Rpn13, Rpn3	Cellular_compartment	Down-regulated genes only
GO:0005783	endoplasmic reticulum	360	81	62.71	0.03194	FBgn0000370, FBgn0001218, FBgn0002940, FBgn0003218, FBgn0003656, FBgn0004132, FBgn0010350, FBgn0010391, FBgn0010470, FBgn0010638, FBgn0011016, FBgn0011336, FBgn0011584, FBgn0014002, FBgn0014868, FBgn0015622, FBgn0015737, FBgn0020251, FBgn0020907, FBgn0021795, FBgn0021872, FBgn0023529, FBgn0025678, FBgn0025682, FBgn0025700, FBgn0026718, FBgn0027095, FBgn0027791, FBgn0028327, FBgn0029709, FBgn00299…	crc, Hsc70-3, ninaE, rdgB, sws, boca, Cds, Gtp-bp, Fkbp14, Sec61beta, SsRbeta, Stt3B, Trp1, Pdi, Ost48, Cnx99A, Hmu, sfl, Scp2, Tapdelta, Xbp1, CG2918, CaBP1, scf, CG5885, Agpat2, Manf, O-fut2, l(1)G0320, CHOp24, Ldsdh1, Spase25, prtp, Agpat1, CG7990, CG1486, Spp, CG17593, CG7149, Hacd1, Edem2, CG10470, ERp60, ReepB, clu, OstDelta, EMC8-9, Fatp3, Sec63, ergic53, Grasp65, ELOVL, P58IPK, p23, CG519…	Cellular_compartment	Down-regulated genes only
GO:0005911	cell-cell junction	90	23	15.68	0.03246	FBgn0000163, FBgn0000547, FBgn0001083, FBgn0002921, FBgn0004646, FBgn0004647, FBgn0005536, FBgn0011661, FBgn0015609, FBgn0015777, FBgn0024189, FBgn0024836, FBgn0026192, FBgn0027108, FBgn0039269, FBgn0039709, FBgn0085387, FBgn0259212, FBgn0261873, FBgn0262614, FBgn0265274, FBgn0265434, FBgn0267488	baz, ed, fw, Atpalpha, ogre, N, Mbs, Moe, CadN, nrv2, sns, stan, par-6, Inx2, veli, Cad99C, shakB, cno, sdt, pyd, Inx3, zip, Mcr	Cellular_compartment	Down-regulated genes only
GO:0005844	polysome	15	6	2.61	0.03328	FBgn0000181, FBgn0022023, FBgn0033912, FBgn0260943, FBgn0261597, FBgn0261599	bic, eIF3h, RpS23, Rbp6, RpS26, RpS29	Cellular_compartment	Down-regulated genes only
GO:0044459	plasma membrane part	571	176	99.47	0.04299	FBgn0000036, FBgn0000037, FBgn0000163, FBgn0000535, FBgn0000547, FBgn0001134, FBgn0001296, FBgn0002921, FBgn0002938, FBgn0002940, FBgn0003218, FBgn0003255, FBgn0003380, FBgn0003429, FBgn0003731, FBgn0003861, FBgn0004167, FBgn0004244, FBgn0004449, FBgn0004573, FBgn0004619, FBgn0004622, FBgn0004623, FBgn0004646, FBgn0004647, FBgn0004852, FBgn0004921, FBgn0005564, FBgn0005671, FBgn0010197, FBgn00103…	nAChRalpha1, mAChR-A, baz, eag, ed, Grd, kar, Atpalpha, ninaC, ninaE, rdgB, rk, Sh, slo, Egfr, trp, kst, Rdl, Ten-m, 5-HT7, GluRIA, TkR99D, Gbeta76C, ogre, N, Ac76E, Ggamma1, Shal, Vha55, Gyc32E, Arf79F, AP-1-2beta, Nmdar1, emp, tutl, Dop1R1, ine, Moe, Mvl, pnut, Esp, Rh5, sty, drl, kek2, mbc, nAChRalpha3, CadN, nrv2, Rab11, Lgr1, fz2, Ork1, klg, Vha36-1, Ac13E, D2hgdh, Ac78C, stan, Oamb, GluClal…	Cellular_compartment	Down-regulated genes only
GO:0034705	potassium channel complex	12	5	2.09	0.043	FBgn0000535, FBgn0003380, FBgn0005564, FBgn0017561, FBgn0262593	eag, Sh, Shal, Ork1, Shab	Cellular_compartment	Down-regulated genes only
GO:0003735	structural constituent of ribosome	154	65	27	3.7e-13	FBgn0002579, FBgn0002590, FBgn0002622, FBgn0002626, FBgn0003274, FBgn0003279, FBgn0003517, FBgn0003941, FBgn0003942, FBgn0004867, FBgn0005533, FBgn0005593, FBgn0010078, FBgn0010265, FBgn0010408, FBgn0010409, FBgn0010411, FBgn0010412, FBgn0011272, FBgn0011284, FBgn0013325, FBgn0014026, FBgn0015288, FBgn0015521, FBgn0015756, FBgn0016726, FBgn0017545, FBgn0017579, FBgn0020910, FBgn0023170, FBgn00247…	RpL36, RpS5a, RpS3, RpL32, RpLP2, RpL4, sta, RpL40, RpS27A, RpS2, RpS17, RpL7, RpL23, RpS13, RpS9, RpL18A, RpS18, RpS19a, RpL13, RpS4, RpL11, RpL7A, RpL22, RpS21, RpL9, RpL29, RpS3A, RpL14, RpL3, RpL39, RpL10, RpL35, RpL17, RpS28b, RpL37a, mRpL28, RpL36A, RpL24, CG10602, RpL21, RpS11, RpS23, RpS15, RpS16, RpL12, RpL28, RpL18, RpL10Ab, RpL26, RpL35A, RpL13A, RpL34b, RpS30, RpL27, RpS8, RpS7, RpL6,…	Molecular_function	Down-regulated genes only
GO:0005184	neuropeptide hormone activity	26	20	4.56	5.1e-11	FBgn0000500, FBgn0011581, FBgn0012344, FBgn0013767, FBgn0023178, FBgn0027109, FBgn0028374, FBgn0028418, FBgn0032048, FBgn0032336, FBgn0032840, FBgn0035023, FBgn0035092, FBgn0035282, FBgn0036713, FBgn0037976, FBgn0039722, FBgn0040813, FBgn0042201, FBgn0053527	Dsk, Ms, Dh44, Crz, Pdf, NPF, Hug, Lk, Dh31, AstC, sNPF, ITP, Nplp1, CNMa, Mip, Tk, Capa, Nplp2, Nplp3, SIFa	Molecular_function	Down-regulated genes only
GO:0004298	threonine-type endopeptidase activity	14	13	2.45	1.6e-09	FBgn0002284, FBgn0004066, FBgn0010590, FBgn0016697, FBgn0023174, FBgn0023175, FBgn0026380, FBgn0029134, FBgn0032596, FBgn0086134, FBgn0250746, FBgn0250843, FBgn0261394	Prosbeta6, Prosalpha4, Prosbeta1, Prosalpha5, Prosbeta2, Prosalpha7, Prosbeta3, Prosbeta5, Prosbeta4, Prosalpha2, Prosbeta7, Prosalpha6, Prosalpha3	Molecular_function	Down-regulated genes only
GO:0005509	calcium ion binding	143	48	25.07	2.1e-06	FBgn0000083, FBgn0000084, FBgn0004580, FBgn0004611, FBgn0004647, FBgn0005664, FBgn0010470, FBgn0011204, FBgn0013995, FBgn0015609, FBgn0015622, FBgn0020907, FBgn0022160, FBgn0023129, FBgn0024836, FBgn0025682, FBgn0026403, FBgn0026562, FBgn0028646, FBgn0030362, FBgn0030529, FBgn0030897, FBgn0031414, FBgn0031544, FBgn0031850, FBgn0031879, FBgn0032480, FBgn0034070, FBgn0035539, FBgn0038829, FBgn00390…	AnxB9, AnxB10, Cbp53E, Plc21C, N, Crys, Fkbp14, cue, Calx, CadN, Cnx99A, Scp2, Gpo1, aay, stan, scf, Ndg, SPARC, aralar1, regucalcin, Clic, Frq1, eys, CG17593, Tsp, uif, Edem2, SP2353, slow, CG17271, Cow, Cad96Cb, CG5890, Cad99C, CG11638, LpR2, CG31345, wry, NUCB1, dpy, Dgk, alpha-Spec, alpha-Man-Ia, kug, Cpn, magu, sli, rdgC	Molecular_function	Down-regulated genes only
GO:0071855	neuropeptide receptor binding	11	9	1.93	6e-06	FBgn0000500, FBgn0011581, FBgn0013767, FBgn0027109, FBgn0028374, FBgn0032840, FBgn0037976, FBgn0039722, FBgn0053527	Dsk, Ms, Crz, NPF, Hug, sNPF, Tk, Capa, SIFa	Molecular_function	Down-regulated genes only
GO:0046933	proton-transporting ATP synthase activity, rotational mechanism	13	9	2.28	5.5e-05	FBgn0010217, FBgn0011211, FBgn0014391, FBgn0016120, FBgn0016691, FBgn0019644, FBgn0020235, FBgn0038224, FBgn0039830	ATPsynbeta, blw, sun, ATPsynD, ATPsynO, ATPsynB, ATPsyngamma, ATPsynE, ATPsynC	Molecular_function	Down-regulated genes only
GO:0015079	potassium ion transmembrane transporter activity	50	23	8.77	0.00015	FBgn0000535, FBgn0002921, FBgn0003380, FBgn0003429, FBgn0004619, FBgn0005564, FBgn0015777, FBgn0017561, FBgn0028704, FBgn0029761, FBgn0032689, FBgn0032946, FBgn0033257, FBgn0036279, FBgn0038165, FBgn0039081, FBgn0040297, FBgn0051547, FBgn0260971, FBgn0261794, FBgn0262593, FBgn0263390, FBgn0263397	eag, Atpalpha, Sh, slo, GluRIA, Shal, nrv2, Ork1, Nckx30C, SK, CG10413, nrv3, sand, Ncc69, Task6, Irk2, Nhe2, NKCC, CG42594, kcc, Shab, Nha2, Ih	Molecular_function	Down-regulated genes only
GO:0004129	cytochrome-c oxidase activity	12	8	2.1	0.00022	FBgn0015031, FBgn0019624, FBgn0031066, FBgn0032833, FBgn0034877, FBgn0040529, FBgn0040773, FBgn0263911	cype, COX5A, COX6B, COX4, levy, COX7A, COX7C, COX8	Molecular_function	Down-regulated genes only
GO:0004930	G protein-coupled receptor activity	87	33	15.25	0.00025	FBgn0000037, FBgn0002940, FBgn0003255, FBgn0004573, FBgn0004622, FBgn0011582, FBgn0014019, FBgn0016650, FBgn0024836, FBgn0024944, FBgn0025595, FBgn0025680, FBgn0027575, FBgn0030437, FBgn0031770, FBgn0033313, FBgn0033744, FBgn0035010, FBgn0035623, FBgn0036260, FBgn0037408, FBgn0038063, FBgn0038653, FBgn0038874, FBgn0038880, FBgn0039747, FBgn0050361, FBgn0052547, FBgn0053517, FBgn0053639, FBgn02607…	mAChR-A, ninaE, rk, 5-HT7, TkR99D, Dop1R1, Rh5, Lgr1, stan, Oamb, AkhR, cry, GABA-B-R2, hec, CG13995, Cirl, Dh44-R2, CG13579, mthl2, Rh7, NPFR, Octbeta2R, Octalpha2R, ETHR, SIFaR, AdoR, mtt, CG32547, Dop2R, CG33639, Pdfr, CG43795, CG44153	Molecular_function	Down-regulated genes only
GO:0015108	chloride transmembrane transporter activity	31	14	5.43	0.00033	FBgn0001134, FBgn0004244, FBgn0010414, FBgn0024963, FBgn0030529, FBgn0031865, FBgn0032689, FBgn0036279, FBgn0038721, FBgn0040238, FBgn0051547, FBgn0261444, FBgn0261794, FBgn0264908	Grd, Rdl, SerT, GluClalpha, Clic, Nha1, CG10413, Ncc69, subdued, Best1, NKCC, CG3638, kcc, pHCl-1	Molecular_function	Down-regulated genes only
GO:0050662	coenzyme binding	142	41	24.89	0.00051	FBgn0001091, FBgn0001092, FBgn0001128, FBgn0001248, FBgn0002719, FBgn0003423, FBgn0004057, FBgn0004516, FBgn0004654, FBgn0010387, FBgn0015623, FBgn0022774, FBgn0023507, FBgn0023537, FBgn0025628, FBgn0025680, FBgn0027291, FBgn0027580, FBgn0029155, FBgn0030612, FBgn0031174, FBgn0031238, FBgn0031860, FBgn0033079, FBgn0034390, FBgn0034629, FBgn0036157, FBgn0036211, FBgn0036381, FBgn0036762, FBgn00368…	Gapdh1, Gapdh2, Gpdh1, Idh, Men, slgA, Zw, Gad1, Pgd, Acbp2, Cpr, Oat, D2hgdh, CG17896, CG4199, cry, Idh3a, PCB, Men-b, CG5599, CG1486, CG3645, CG11236, Fmo-2, CG15093, Acox57D-d, CG7560, CG5946, CG8745, CG7430, CG3902, Gabat, CG5955, ND-39, ninaG, Kyat, PH4alphaEFB, CG1544, Tdc2, Mical, Tdc1	Molecular_function	Down-regulated genes only
GO:0046961	proton-transporting ATPase activity, rotational mechanism	16	9	2.8	0.00053	FBgn0005671, FBgn0010217, FBgn0022097, FBgn0027779, FBgn0028662, FBgn0028670, FBgn0262511, FBgn0262736, FBgn0263598	Vha55, ATPsynbeta, Vha36-1, VhaSFD, VhaPPA1-1, Vha100-2, Vha44, Vha16-1, Vha68-2	Molecular_function	Down-regulated genes only
GO:0015370	solute:sodium symporter activity	29	13	5.08	0.00058	FBgn0010414, FBgn0010497, FBgn0011603, FBgn0026439, FBgn0029762, FBgn0031935, FBgn0035969, FBgn0036279, FBgn0038641, FBgn0039915, FBgn0051547, FBgn0053296, FBgn0259111	SerT, dmGlut, ine, Eaat1, NAAT1, CG13793, CG4476, Ncc69, CG7708, Gat, NKCC, CG33296, Ndae1	Molecular_function	Down-regulated genes only
GO:0005326	neurotransmitter transporter activity	33	14	5.79	0.00071	FBgn0010414, FBgn0010497, FBgn0011603, FBgn0026439, FBgn0028646, FBgn0029762, FBgn0031424, FBgn0031935, FBgn0035969, FBgn0037976, FBgn0038641, FBgn0039915, FBgn0041605, FBgn0053296	SerT, dmGlut, ine, Eaat1, aralar1, NAAT1, VGlut, CG13793, CG4476, Tk, CG7708, Gat, cpx, CG33296	Molecular_function	Down-regulated genes only
GO:0038023	signaling receptor activity	221	77	38.74	0.00098	FBgn0000036, FBgn0000037, FBgn0001134, FBgn0002940, FBgn0003255, FBgn0003651, FBgn0003731, FBgn0004244, FBgn0004364, FBgn0004370, FBgn0004573, FBgn0004619, FBgn0004622, FBgn0004647, FBgn0004865, FBgn0010197, FBgn0010399, FBgn0011582, FBgn0011603, FBgn0014019, FBgn0015380, FBgn0015519, FBgn0016650, FBgn0016797, FBgn0017590, FBgn0024836, FBgn0024944, FBgn0024963, FBgn0025595, FBgn0025680, FBgn00275…	nAChRalpha1, mAChR-A, Grd, ninaE, rk, svp, Egfr, Rdl, 18w, Ptp10D, 5-HT7, GluRIA, TkR99D, N, Eip78C, Gyc32E, Nmdar1, Dop1R1, ine, Rh5, drl, nAChRalpha3, Lgr1, fz2, klg, stan, Oamb, GluClalpha, AkhR, cry, GABA-B-R2, NtR, SK, hec, wgn, et, nAChRbeta3, Ir25a, CG13995, Nlg2, Dscam1, Cirl, Dh44-R2, unc-5, Toll-7, CG10339, CG13579, mthl2, PGRP-LA, Ir68a, Rh7, Toll-6, Ir76b, NPFR, ATP6AP2, PGRP-LB, Octb…	Molecular_function	Down-regulated genes only
GO:0015081	sodium ion transmembrane transporter activity	53	24	9.29	0.00116	FBgn0002921, FBgn0004619, FBgn0010414, FBgn0010497, FBgn0011603, FBgn0013995, FBgn0015777, FBgn0026439, FBgn0028704, FBgn0029762, FBgn0031865, FBgn0031935, FBgn0032946, FBgn0035969, FBgn0036279, FBgn0036937, FBgn0038641, FBgn0039915, FBgn0040297, FBgn0051547, FBgn0053296, FBgn0085434, FBgn0259111, FBgn0263390	Atpalpha, GluRIA, SerT, dmGlut, ine, Calx, nrv2, Eaat1, Nckx30C, NAAT1, Nha1, CG13793, nrv3, CG4476, Ncc69, Ir76b, CG7708, Gat, Nhe2, NKCC, CG33296, NaCP60E, Ndae1, Nha2	Molecular_function	Down-regulated genes only
GO:0015103	inorganic anion transmembrane transporter activity	51	24	8.94	0.00152	FBgn0001134, FBgn0004244, FBgn0004363, FBgn0010414, FBgn0010497, FBgn0013953, FBgn0024315, FBgn0024963, FBgn0026409, FBgn0027610, FBgn0030529, FBgn0030890, FBgn0031865, FBgn0032689, FBgn0036279, FBgn0038354, FBgn0038721, FBgn0039789, FBgn0040238, FBgn0051547, FBgn0259111, FBgn0261444, FBgn0261794, FBgn0264908	Grd, Rdl, porin, SerT, dmGlut, Esp, Picot, GluClalpha, Mpcp2, Dic1, Clic, CG7536, Nha1, CG10413, Ncc69, CG5404, subdued, CG9717, Best1, NKCC, Ndae1, CG3638, kcc, pHCl-1	Molecular_function	Down-regulated genes only
GO:0009975	cyclase activity	18	9	3.16	0.00162	FBgn0004852, FBgn0010197, FBgn0013973, FBgn0022710, FBgn0024150, FBgn0025630, FBgn0038435, FBgn0038436, FBgn0053958	Ac76E, Gyc32E, Gycbeta100B, Ac13E, Ac78C, Rtca, Gyc89Da, Gyc89Db, CG33958	Molecular_function	Down-regulated genes only
GO:0005310	dicarboxylic acid transmembrane transporter activity	12	7	2.1	0.00174	FBgn0010497, FBgn0026439, FBgn0027610, FBgn0028646, FBgn0031424, FBgn0033391, FBgn0036816	dmGlut, Eaat1, Dic1, aralar1, VGlut, CG8026, Indy	Molecular_function	Down-regulated genes only
GO:0015267	channel activity	125	50	21.91	0.00186	FBgn0000036, FBgn0000535, FBgn0001134, FBgn0002917, FBgn0003380, FBgn0003429, FBgn0003861, FBgn0004244, FBgn0004363, FBgn0004619, FBgn0004646, FBgn0005564, FBgn0010399, FBgn0010414, FBgn0015519, FBgn0017561, FBgn0024963, FBgn0027108, FBgn0028704, FBgn0029147, FBgn0029761, FBgn0030529, FBgn0031261, FBgn0031634, FBgn0032746, FBgn0033257, FBgn0034883, FBgn0036150, FBgn0036937, FBgn0038165, FBgn00387…	nAChRalpha1, eag, Grd, na, Sh, slo, trp, Rdl, porin, GluRIA, ogre, Shal, Nmdar1, SerT, nAChRalpha3, Ork1, GluClalpha, Inx2, Nckx30C, NtR, SK, Clic, nAChRbeta3, Ir25a, CG10470, sand, Eglp2, Ir68a, Ir76b, Task6, subdued, Irk2, Best1, Nmdar2, Mid1, stg1, shakB, NaCP60E, OtopLc, CG42594, CG3638, Shab, Cngl, Ih, GluRIB, Ca-alpha1T, pHCl-1, Piezo, Trpm, Inx3	Molecular_function	Down-regulated genes only
GO:0016829	lyase activity	99	33	17.36	0.00213	FBgn0000579, FBgn0002622, FBgn0003067, FBgn0003141, FBgn0003257, FBgn0004516, FBgn0004852, FBgn0010197, FBgn0013307, FBgn0013973, FBgn0015737, FBgn0022710, FBgn0024150, FBgn0024957, FBgn0025352, FBgn0027843, FBgn0027844, FBgn0028479, FBgn0031174, FBgn0032394, FBgn0033879, FBgn0035245, FBgn0036381, FBgn0037788, FBgn0037955, FBgn0038435, FBgn0038436, FBgn0039094, FBgn0039486, FBgn0050446, FBgn00539…	Eno, RpS3, Pepck1, pr, r-l, Gad1, Ac76E, Gyc32E, Odc1, Gycbeta100B, Hmu, Ac13E, Ac78C, Irp-1B, Thiolase, CAH2, CAH1, Mtpalpha, CG1486, Hacd1, Echs1, GC, CG8745, CAH7, Kyat, Gyc89Da, Gyc89Db, CG10184, CAH9, Tdc2, CG33958, Tdc1, Pal2	Molecular_function	Down-regulated genes only
GO:0022843	voltage-gated cation channel activity	29	12	5.08	0.0022	FBgn0000535, FBgn0003380, FBgn0003429, FBgn0005564, FBgn0010399, FBgn0039081, FBgn0053513, FBgn0064123, FBgn0085434, FBgn0262593, FBgn0263397, FBgn0264386	eag, Sh, slo, Shal, Nmdar1, Irk2, Nmdar2, stg1, NaCP60E, Shab, Ih, Ca-alpha1T	Molecular_function	Down-regulated genes only
GO:0005267	potassium channel activity	33	13	5.79	0.00246	FBgn0000535, FBgn0003380, FBgn0003429, FBgn0004619, FBgn0005564, FBgn0017561, FBgn0029761, FBgn0033257, FBgn0038165, FBgn0039081, FBgn0260971, FBgn0262593, FBgn0263397	eag, Sh, slo, GluRIA, Shal, Ork1, SK, sand, Task6, Irk2, CG42594, Shab, Ih	Molecular_function	Down-regulated genes only
GO:0099516	ion antiporter activity	19	9	3.33	0.0026	FBgn0013953, FBgn0013995, FBgn0028704, FBgn0031865, FBgn0038354, FBgn0039789, FBgn0040297, FBgn0259111, FBgn0263390	Esp, Calx, Nckx30C, Nha1, CG5404, CG9717, Nhe2, Ndae1, Nha2	Molecular_function	Down-regulated genes only
GO:0004970	ionotropic glutamate receptor activity	13	7	2.28	0.00321	FBgn0004619, FBgn0010399, FBgn0031634, FBgn0036150, FBgn0036937, FBgn0053513, FBgn0264000	GluRIA, Nmdar1, Ir25a, Ir68a, Ir76b, Nmdar2, GluRIB	Molecular_function	Down-regulated genes only
GO:0015450	P-P-bond-hydrolysis-driven protein transmembrane transporter activity	13	7	2.28	0.00321	FBgn0010638, FBgn0016041, FBgn0031049, FBgn0033357, FBgn0033691, FBgn0035473, FBgn0036928	Sec61beta, Tom40, Sec61gamma, Tom7, CG8860, mge, Tom20	Molecular_function	Down-regulated genes only
GO:0022839	ion gated channel activity	86	33	15.08	0.00355	FBgn0000036, FBgn0000535, FBgn0001134, FBgn0003380, FBgn0003429, FBgn0004244, FBgn0004363, FBgn0004619, FBgn0005564, FBgn0010399, FBgn0015519, FBgn0024963, FBgn0029147, FBgn0029761, FBgn0031261, FBgn0031634, FBgn0036150, FBgn0036937, FBgn0038721, FBgn0039081, FBgn0040238, FBgn0053513, FBgn0053988, FBgn0064123, FBgn0085434, FBgn0261444, FBgn0262593, FBgn0263257, FBgn0263397, FBgn0264000, FBgn02643…	nAChRalpha1, eag, Grd, Sh, slo, Rdl, porin, GluRIA, Shal, Nmdar1, nAChRalpha3, GluClalpha, NtR, SK, nAChRbeta3, Ir25a, Ir68a, Ir76b, subdued, Irk2, Best1, Nmdar2, Mid1, stg1, NaCP60E, CG3638, Shab, Cngl, Ih, GluRIB, Ca-alpha1T, pHCl-1, Trpm	Molecular_function	Down-regulated genes only
GO:0015171	amino acid transmembrane transporter activity	46	16	8.06	0.00367	FBgn0001296, FBgn0010497, FBgn0026439, FBgn0028425, FBgn0028646, FBgn0029762, FBgn0031424, FBgn0031935, FBgn0035969, FBgn0036007, FBgn0036279, FBgn0038641, FBgn0039915, FBgn0051547, FBgn0053296, FBgn0261794	kar, dmGlut, Eaat1, JhI-21, aralar1, NAAT1, VGlut, CG13793, CG4476, path, Ncc69, CG7708, Gat, NKCC, CG33296, kcc	Molecular_function	Down-regulated genes only
GO:0008188	neuropeptide receptor activity	35	13	6.14	0.0045	FBgn0003255, FBgn0004622, FBgn0016650, FBgn0025595, FBgn0030437, FBgn0031770, FBgn0033744, FBgn0037408, FBgn0038874, FBgn0038880, FBgn0052547, FBgn0053639, FBgn0260753	rk, TkR99D, Lgr1, AkhR, hec, CG13995, Dh44-R2, NPFR, ETHR, SIFaR, CG32547, CG33639, Pdfr	Molecular_function	Down-regulated genes only
GO:0009881	photoreceptor activity	11	6	1.93	0.00594	FBgn0002940, FBgn0014019, FBgn0025680, FBgn0029761, FBgn0036260, FBgn0085387	ninaE, Rh5, cry, SK, Rh7, shakB	Molecular_function	Down-regulated genes only
GO:1901681	sulfur compound binding	36	13	6.31	0.00594	FBgn0000108, FBgn0010387, FBgn0023537, FBgn0027111, FBgn0027580, FBgn0030612, FBgn0031850, FBgn0036494, FBgn0039827, FBgn0052183, FBgn0262169, FBgn0264089, FBgn0265048	Appl, Acbp2, CG17896, miple1, PCB, CG5599, Tsp, Toll-6, CG1544, Ccn, magu, sli, cv-d	Molecular_function	Down-regulated genes only
GO:0016849	phosphorus-oxygen lyase activity	18	8	3.16	0.00724	FBgn0004852, FBgn0010197, FBgn0013973, FBgn0022710, FBgn0024150, FBgn0038435, FBgn0038436, FBgn0053958	Ac76E, Gyc32E, Gycbeta100B, Ac13E, Ac78C, Gyc89Da, Gyc89Db, CG33958	Molecular_function	Down-regulated genes only
GO:0030594	neurotransmitter receptor activity	50	20	8.77	0.00745	FBgn0000036, FBgn0000037, FBgn0001134, FBgn0004244, FBgn0004573, FBgn0004619, FBgn0010399, FBgn0011582, FBgn0015519, FBgn0024944, FBgn0027575, FBgn0031261, FBgn0031634, FBgn0036150, FBgn0036937, FBgn0038063, FBgn0038653, FBgn0053513, FBgn0053517, FBgn0264000	nAChRalpha1, mAChR-A, Grd, Rdl, 5-HT7, GluRIA, Nmdar1, Dop1R1, nAChRalpha3, Oamb, GABA-B-R2, nAChRbeta3, Ir25a, Ir68a, Ir76b, Octbeta2R, Octalpha2R, Nmdar2, Dop2R, GluRIB	Molecular_function	Down-regulated genes only
GO:0052689	carboxylic ester hydrolase activity	58	18	10.17	0.00833	FBgn0000024, FBgn0000592, FBgn0003656, FBgn0004045, FBgn0004047, FBgn0005391, FBgn0015577, FBgn0027079, FBgn0027086, FBgn0027094, FBgn0027584, FBgn0030362, FBgn0030828, FBgn0032242, FBgn0033382, FBgn0038398, FBgn0042138, FBgn0261393	Ace, Est-6, sws, Yp1, Yp3, Yp2, alpha-Est9, ValRS, IleRS, AlaRS, CG4757, regucalcin, CG5162, CG5355, Hydr1, sxe2, CG18815, alpha-Est5	Molecular_function	Down-regulated genes only
GO:0005253	anion channel activity	22	9	3.86	0.0085	FBgn0001134, FBgn0004244, FBgn0004363, FBgn0024963, FBgn0030529, FBgn0038721, FBgn0040238, FBgn0261444, FBgn0264908	Grd, Rdl, porin, GluClalpha, Clic, subdued, Best1, CG3638, pHCl-1	Molecular_function	Down-regulated genes only
GO:0016616	oxidoreductase activity, acting on the CH-OH group of donors, NAD or NADP as acceptor	76	22	13.32	0.00929	FBgn0001128, FBgn0001248, FBgn0002719, FBgn0004057, FBgn0004654, FBgn0011693, FBgn0022160, FBgn0025352, FBgn0027291, FBgn0027552, FBgn0028479, FBgn0029155, FBgn0029994, FBgn0030332, FBgn0031630, FBgn0031775, FBgn0033101, FBgn0034390, FBgn0036997, FBgn0051548, FBgn0086254, FBgn0262559	Gpdh1, Idh, Men, Zw, Pgd, Pdh, Gpo1, Thiolase, Idh3a, CG10863, Mtpalpha, Men-b, Ldsdh1, CG9360, CG15629, CG9150, CG9436, CG15093, CG5955, CG31548, CG6084, Mdh2	Molecular_function	Down-regulated genes only
GO:0016903	oxidoreductase activity, acting on the aldehyde or oxo group of donors	26	10	4.56	0.0093	FBgn0001091, FBgn0001092, FBgn0012036, FBgn0023537, FBgn0028325, FBgn0034145, FBgn0037138, FBgn0037709, FBgn0039635, FBgn0039827	Gapdh1, Gapdh2, Aldh, CG17896, Pdha, CG5065, P5CDh1, CG8199, Pdhb, CG1544	Molecular_function	Down-regulated genes only
GO:0099094	ligand-gated cation channel activity	34	12	5.96	0.00992	FBgn0000036, FBgn0004619, FBgn0010399, FBgn0015519, FBgn0031261, FBgn0031634, FBgn0036937, FBgn0039081, FBgn0053513, FBgn0263257, FBgn0264000, FBgn0265194	nAChRalpha1, GluRIA, Nmdar1, nAChRalpha3, nAChRbeta3, Ir25a, Ir76b, Irk2, Nmdar2, Cngl, GluRIB, Trpm	Molecular_function	Down-regulated genes only
GO:0005179	hormone activity	32	24	5.61	0.00994	FBgn0000500, FBgn0011581, FBgn0012344, FBgn0013767, FBgn0023178, FBgn0027109, FBgn0028374, FBgn0028418, FBgn0031461, FBgn0032048, FBgn0032336, FBgn0032840, FBgn0035023, FBgn0035092, FBgn0035282, FBgn0036713, FBgn0037976, FBgn0039722, FBgn0040813, FBgn0042201, FBgn0044048, FBgn0044050, FBgn0053527, FBgn0083167	Dsk, Ms, Dh44, Crz, Pdf, NPF, Hug, Lk, daw, Dh31, AstC, sNPF, ITP, Nplp1, CNMa, Mip, Tk, Capa, Nplp2, Nplp3, Ilp5, Ilp3, SIFa, Neb-cGP	Molecular_function	Down-regulated genes only
GO:0042562	hormone binding	12	6	2.1	0.01013	FBgn0001257, FBgn0016650, FBgn0025595, FBgn0030703, FBgn0033744, FBgn0039770	ImpL2, Lgr1, AkhR, MSBP, Dh44-R2, CG15537	Molecular_function	Down-regulated genes only
GO:0008227	G protein-coupled amine receptor activity	19	8	3.33	0.01062	FBgn0000037, FBgn0004573, FBgn0011582, FBgn0024944, FBgn0038063, FBgn0038653, FBgn0038874, FBgn0053517	mAChR-A, 5-HT7, Dop1R1, Oamb, Octbeta2R, Octalpha2R, ETHR, Dop2R	Molecular_function	Down-regulated genes only
GO:0071949	FAD binding	19	8	3.33	0.01062	FBgn0003423, FBgn0023507, FBgn0025680, FBgn0031860, FBgn0034629, FBgn0036157, FBgn0036211, FBgn0053208	slgA, D2hgdh, cry, CG11236, Acox57D-d, CG7560, CG5946, Mical	Molecular_function	Down-regulated genes only
GO:0005328	neurotransmitter:sodium symporter activity	23	9	4.03	0.01183	FBgn0010414, FBgn0010497, FBgn0011603, FBgn0029762, FBgn0031935, FBgn0035969, FBgn0038641, FBgn0039915, FBgn0053296	SerT, dmGlut, ine, NAAT1, CG13793, CG4476, CG7708, Gat, CG33296	Molecular_function	Down-regulated genes only
GO:0004888	transmembrane signaling receptor activity	175	61	30.68	0.01291	FBgn0000036, FBgn0000037, FBgn0001134, FBgn0002940, FBgn0003255, FBgn0003731, FBgn0004244, FBgn0004364, FBgn0004370, FBgn0004573, FBgn0004619, FBgn0004622, FBgn0004647, FBgn0010399, FBgn0011582, FBgn0011603, FBgn0014019, FBgn0015380, FBgn0015519, FBgn0016650, FBgn0016797, FBgn0017590, FBgn0024836, FBgn0024944, FBgn0024963, FBgn0025595, FBgn0025680, FBgn0027575, FBgn0029147, FBgn0030437, FBgn00309…	nAChRalpha1, mAChR-A, Grd, ninaE, rk, Egfr, Rdl, 18w, Ptp10D, 5-HT7, GluRIA, TkR99D, N, Nmdar1, Dop1R1, ine, Rh5, drl, nAChRalpha3, Lgr1, fz2, klg, stan, Oamb, GluClalpha, AkhR, cry, GABA-B-R2, NtR, hec, wgn, et, nAChRbeta3, Ir25a, CG13995, Dscam1, Cirl, Dh44-R2, unc-5, CG13579, mthl2, Ir68a, Rh7, Ir76b, NPFR, Octbeta2R, Octalpha2R, ETHR, SIFaR, AdoR, mtt, CG32547, Nmdar2, Dop2R, CG33639, Pdfr, T…	Molecular_function	Down-regulated genes only
GO:0005283	amino acid:sodium symporter activity	16	7	2.8	0.01317	FBgn0010497, FBgn0026439, FBgn0029762, FBgn0031935, FBgn0035969, FBgn0039915, FBgn0053296	dmGlut, Eaat1, NAAT1, CG13793, CG4476, Gat, CG33296	Molecular_function	Down-regulated genes only
GO:0005343	organic acid:sodium symporter activity	16	7	2.8	0.01317	FBgn0010497, FBgn0026439, FBgn0029762, FBgn0031935, FBgn0035969, FBgn0039915, FBgn0053296	dmGlut, Eaat1, NAAT1, CG13793, CG4476, Gat, CG33296	Molecular_function	Down-regulated genes only
GO:0005254	chloride channel activity	20	8	3.51	0.01504	FBgn0001134, FBgn0004244, FBgn0024963, FBgn0030529, FBgn0038721, FBgn0040238, FBgn0261444, FBgn0264908	Grd, Rdl, GluClalpha, Clic, subdued, Best1, CG3638, pHCl-1	Molecular_function	Down-regulated genes only
GO:0016831	carboxy-lyase activity	20	8	3.51	0.01504	FBgn0003067, FBgn0003257, FBgn0004516, FBgn0013307, FBgn0031174, FBgn0035245, FBgn0050446, FBgn0259977	Pepck1, r-l, Gad1, Odc1, CG1486, GC, Tdc2, Tdc1	Molecular_function	Down-regulated genes only
GO:0016835	carbon-oxygen lyase activity	40	13	7.01	0.01565	FBgn0000579, FBgn0002622, FBgn0003141, FBgn0024957, FBgn0025352, FBgn0027843, FBgn0027844, FBgn0028479, FBgn0032394, FBgn0033879, FBgn0036381, FBgn0037788, FBgn0039486	Eno, RpS3, pr, Irp-1B, Thiolase, CAH2, CAH1, Mtpalpha, Hacd1, Echs1, CG8745, CAH7, CAH9	Molecular_function	Down-regulated genes only
GO:0033218	amide binding	66	19	11.57	0.01592	FBgn0001257, FBgn0004432, FBgn0010387, FBgn0010747, FBgn0011016, FBgn0011361, FBgn0023537, FBgn0025595, FBgn0027580, FBgn0031285, FBgn0033744, FBgn0034753, FBgn0035947, FBgn0036260, FBgn0036928, FBgn0039347, FBgn0039770, FBgn0086357, FBgn0261243	ImpL2, Cyp1, Acbp2, Srp54k, SsRbeta, ND-ACP, CG17896, AkhR, PCB, CG3662, Dh44-R2, CG2852, Srp68, Rh7, Tom20, CG5071, CG15537, Sec61alpha, Psa	Molecular_function	Down-regulated genes only
GO:0005539	glycosaminoglycan binding	28	10	4.91	0.01646	FBgn0000108, FBgn0027111, FBgn0031381, FBgn0031850, FBgn0035975, FBgn0036494, FBgn0037906, FBgn0052183, FBgn0243514, FBgn0264089	Appl, miple1, Npc2a, Tsp, PGRP-LA, Toll-6, PGRP-LB, Ccn, eater, sli	Molecular_function	Down-regulated genes only
GO:0016491	oxidoreductase activity	440	111	77.13	0.01847	FBgn0000056, FBgn0000565, FBgn0001091, FBgn0001092, FBgn0001098, FBgn0001128, FBgn0001248, FBgn0001989, FBgn0002719, FBgn0002937, FBgn0003388, FBgn0003423, FBgn0003462, FBgn0003965, FBgn0004057, FBgn0004654, FBgn0005626, FBgn0011576, FBgn0011693, FBgn0012036, FBgn0014002, FBgn0015031, FBgn0015037, FBgn0015038, FBgn0015623, FBgn0019624, FBgn0022160, FBgn0023507, FBgn0023537, FBgn0025352, FBgn00256…	Adhr, Eip71CD, Gapdh1, Gapdh2, Gdh, Gpdh1, Idh, ND-B17, Men, ninaB, shd, slgA, Sod1, v, Zw, Pgd, ple, Cyp4d2, Pdh, Aldh, Pdi, cype, Cyp4p1, Cyp9b1, Cpr, COX5A, Gpo1, D2hgdh, CG17896, Thiolase, CG4199, CaBP1, Idh3a, CG10863, Pdha, Mtpalpha, Men-b, ND-ASHI, ND-MNLL, Ldsdh1, CG9360, Clic, UQCR-14, COX6B, CG3645, CG3597, CG3609, ND-B17.2, CG15629, Cyp4ac1, CG9150, CG11236, Cyp4d21, Mco1, firl, CG1021…	Molecular_function	Down-regulated genes only
GO:0071617	lysophospholipid acyltransferase activity	10	5	1.75	0.01902	FBgn0026718, FBgn0030421, FBgn0031815, FBgn0033476, FBgn0036622	Agpat2, Agpat1, frj, oys, Agpat4	Molecular_function	Down-regulated genes only
GO:0015491	cation:cation antiporter activity	10	5	1.75	0.01902	FBgn0013995, FBgn0028704, FBgn0031865, FBgn0040297, FBgn0263390	Calx, Nckx30C, Nha1, Nhe2, Nha2	Molecular_function	Down-regulated genes only
GO:0098631	cell adhesion mediator activity	10	5	1.75	0.01902	FBgn0001257, FBgn0010473, FBgn0261046, FBgn0265002, FBgn0265296	ImpL2, tutl, Dscam3, CG44153, Dscam2	Molecular_function	Down-regulated genes only
GO:0098632	cell-cell adhesion mediator activity	10	5	1.75	0.01902	FBgn0001257, FBgn0010473, FBgn0261046, FBgn0265002, FBgn0265296	ImpL2, tutl, Dscam3, CG44153, Dscam2	Molecular_function	Down-regulated genes only
GO:0005416	amino acid:cation symporter activity	17	7	2.98	0.01906	FBgn0010497, FBgn0026439, FBgn0029762, FBgn0031935, FBgn0035969, FBgn0039915, FBgn0053296	dmGlut, Eaat1, NAAT1, CG13793, CG4476, Gat, CG33296	Molecular_function	Down-regulated genes only
GO:0005249	voltage-gated potassium channel activity	17	7	2.98	0.01906	FBgn0000535, FBgn0003380, FBgn0003429, FBgn0005564, FBgn0039081, FBgn0262593, FBgn0263397	eag, Sh, slo, Shal, Irk2, Shab, Ih	Molecular_function	Down-regulated genes only
GO:0016769	transferase activity, transferring nitrogenous groups	17	7	2.98	0.01906	FBgn0001091, FBgn0001092, FBgn0022774, FBgn0030482, FBgn0036381, FBgn0036927, FBgn0037955	Gapdh1, Gapdh2, Oat, CG1673, CG8745, Gabat, Kyat	Molecular_function	Down-regulated genes only
GO:0005230	extracellular ligand-gated ion channel activity	34	15	5.96	0.02017	FBgn0000036, FBgn0001134, FBgn0004244, FBgn0004619, FBgn0010399, FBgn0015519, FBgn0024963, FBgn0029147, FBgn0031261, FBgn0031634, FBgn0036150, FBgn0036937, FBgn0053513, FBgn0264000, FBgn0264908	nAChRalpha1, Grd, Rdl, GluRIA, Nmdar1, nAChRalpha3, GluClalpha, NtR, nAChRbeta3, Ir25a, Ir68a, Ir76b, Nmdar2, GluRIB, pHCl-1	Molecular_function	Down-regulated genes only
GO:0050660	flavin adenine dinucleotide binding	50	15	8.77	0.02096	FBgn0003423, FBgn0015623, FBgn0023507, FBgn0025628, FBgn0025680, FBgn0031238, FBgn0031860, FBgn0033079, FBgn0034629, FBgn0036157, FBgn0036211, FBgn0036762, FBgn0036824, FBgn0037896, FBgn0053208	slgA, Cpr, D2hgdh, CG4199, cry, CG3645, CG11236, Fmo-2, Acox57D-d, CG7560, CG5946, CG7430, CG3902, ninaG, Mical	Molecular_function	Down-regulated genes only
GO:0008028	monocarboxylic acid transmembrane transporter activity	25	9	4.38	0.02128	FBgn0023549, FBgn0031935, FBgn0033095, FBgn0036816, FBgn0037714, FBgn0037715, FBgn0038662, FBgn0039915, FBgn0053296	Mct1, CG13793, chk, Indy, CG9396, CG9399, Mpc1, Gat, CG33296	Molecular_function	Down-regulated genes only
GO:0050661	NADP binding	14	6	2.45	0.02403	FBgn0001091, FBgn0001092, FBgn0004057, FBgn0004654, FBgn0033079, FBgn0034390	Gapdh1, Gapdh2, Zw, Pgd, Fmo-2, CG15093	Molecular_function	Down-regulated genes only
GO:0005261	cation channel activity	93	35	16.3	0.02562	FBgn0000036, FBgn0000535, FBgn0001134, FBgn0002917, FBgn0003380, FBgn0003429, FBgn0003861, FBgn0004619, FBgn0005564, FBgn0010399, FBgn0010414, FBgn0015519, FBgn0017561, FBgn0028704, FBgn0029761, FBgn0031261, FBgn0031634, FBgn0032746, FBgn0033257, FBgn0036937, FBgn0038165, FBgn0039081, FBgn0053513, FBgn0053988, FBgn0064123, FBgn0085434, FBgn0259150, FBgn0260971, FBgn0262593, FBgn0263257, FBgn02633…	nAChRalpha1, eag, Grd, na, Sh, slo, trp, GluRIA, Shal, Nmdar1, SerT, nAChRalpha3, Ork1, Nckx30C, SK, nAChRbeta3, Ir25a, CG10470, sand, Ir76b, Task6, Irk2, Nmdar2, Mid1, stg1, NaCP60E, OtopLc, CG42594, Shab, Cngl, Ih, GluRIB, Ca-alpha1T, Piezo, Trpm	Molecular_function	Down-regulated genes only
GO:0015179	L-amino acid transmembrane transporter activity	18	7	3.16	0.02658	FBgn0010497, FBgn0026439, FBgn0028425, FBgn0028646, FBgn0029762, FBgn0031424, FBgn0035969	dmGlut, Eaat1, JhI-21, aralar1, NAAT1, VGlut, CG4476	Molecular_function	Down-regulated genes only
GO:0099528	G protein-coupled neurotransmitter receptor activity	18	7	3.16	0.02658	FBgn0000037, FBgn0004573, FBgn0011582, FBgn0024944, FBgn0027575, FBgn0038063, FBgn0038653	mAChR-A, 5-HT7, Dop1R1, Oamb, GABA-B-R2, Octbeta2R, Octalpha2R	Molecular_function	Down-regulated genes only
GO:0015238	drug transmembrane transporter activity	22	8	3.86	0.02759	FBgn0010497, FBgn0026439, FBgn0027610, FBgn0028646, FBgn0031424, FBgn0033391, FBgn0035695, FBgn0036816	dmGlut, Eaat1, Dic1, aralar1, VGlut, CG8026, CG10226, Indy	Molecular_function	Down-regulated genes only
GO:0042277	peptide binding	52	15	9.12	0.02967	FBgn0001257, FBgn0004432, FBgn0010747, FBgn0011016, FBgn0025595, FBgn0031285, FBgn0033744, FBgn0034753, FBgn0035947, FBgn0036260, FBgn0036928, FBgn0039347, FBgn0039770, FBgn0086357, FBgn0261243	ImpL2, Cyp1, Srp54k, SsRbeta, AkhR, CG3662, Dh44-R2, CG2852, Srp68, Rh7, Tom20, CG5071, CG15537, Sec61alpha, Psa	Molecular_function	Down-regulated genes only
GO:0015662	ATPase activity, coupled to transmembrane movement of ions, phosphorylative mechanism	11	5	1.93	0.02993	FBgn0002921, FBgn0003218, FBgn0015777, FBgn0032946, FBgn0262511	Atpalpha, rdgB, nrv2, nrv3, Vha44	Molecular_function	Down-regulated genes only
GO:0004180	carboxypeptidase activity	11	5	1.93	0.02993	FBgn0004648, FBgn0033241, FBgn0035076, FBgn0039073, FBgn0052483	svr, CG2915, Ance-5, CG4408, CG32483	Molecular_function	Down-regulated genes only
GO:0015298	solute:cation antiporter activity	11	5	1.93	0.02993	FBgn0013995, FBgn0028704, FBgn0031865, FBgn0040297, FBgn0263390	Calx, Nckx30C, Nha1, Nhe2, Nha2	Molecular_function	Down-regulated genes only
GO:0005216	ion channel activity	117	45	20.51	0.03169	FBgn0000036, FBgn0000535, FBgn0001134, FBgn0002917, FBgn0003380, FBgn0003429, FBgn0003861, FBgn0004244, FBgn0004363, FBgn0004619, FBgn0005564, FBgn0010399, FBgn0010414, FBgn0015519, FBgn0017561, FBgn0024963, FBgn0028704, FBgn0029147, FBgn0029761, FBgn0030529, FBgn0031261, FBgn0031634, FBgn0032746, FBgn0033257, FBgn0036150, FBgn0036937, FBgn0038165, FBgn0038721, FBgn0039081, FBgn0040238, FBgn00535…	nAChRalpha1, eag, Grd, na, Sh, slo, trp, Rdl, porin, GluRIA, Shal, Nmdar1, SerT, nAChRalpha3, Ork1, GluClalpha, Nckx30C, NtR, SK, Clic, nAChRbeta3, Ir25a, CG10470, sand, Ir68a, Ir76b, Task6, subdued, Irk2, Best1, Nmdar2, Mid1, stg1, NaCP60E, OtopLc, CG42594, CG3638, Shab, Cngl, Ih, GluRIB, Ca-alpha1T, pHCl-1, Piezo, Trpm	Molecular_function	Down-regulated genes only
GO:0019842	vitamin binding	48	14	8.41	0.03195	FBgn0004516, FBgn0011361, FBgn0022774, FBgn0027580, FBgn0031174, FBgn0035636, FBgn0036381, FBgn0036927, FBgn0037955, FBgn0039776, FBgn0039827, FBgn0050446, FBgn0087002, FBgn0259977	Gad1, ND-ACP, Oat, PCB, CG1486, Cralbp, CG8745, Gabat, Kyat, PH4alphaEFB, CG1544, Tdc2, apolpp, Tdc1	Molecular_function	Down-regulated genes only
GO:0042165	neurotransmitter binding	15	6	2.63	0.03424	FBgn0010414, FBgn0031935, FBgn0038641, FBgn0039770, FBgn0039915, FBgn0053296	SerT, CG13793, CG7708, CG15537, Gat, CG33296	Molecular_function	Down-regulated genes only
GO:0016830	carbon-carbon lyase activity	27	9	4.73	0.03518	FBgn0003067, FBgn0003257, FBgn0004516, FBgn0013307, FBgn0031174, FBgn0035245, FBgn0039094, FBgn0050446, FBgn0259977	Pepck1, r-l, Gad1, Odc1, CG1486, GC, CG10184, Tdc2, Tdc1	Molecular_function	Down-regulated genes only
GO:0050839	cell adhesion molecule binding	36	11	6.31	0.0393	FBgn0000547, FBgn0011722, FBgn0015609, FBgn0024836, FBgn0027598, FBgn0052183, FBgn0259212, FBgn0260745, FBgn0261574, FBgn0262614, FBgn0262869	ed, Tig, CadN, stan, cindr, Ccn, cno, mfas, kug, pyd, Gfrl	Molecular_function	Down-regulated genes only
GO:0022838	substrate-specific channel activity	118	45	20.69	0.0398	FBgn0000036, FBgn0000535, FBgn0001134, FBgn0002917, FBgn0003380, FBgn0003429, FBgn0003861, FBgn0004244, FBgn0004363, FBgn0004619, FBgn0005564, FBgn0010399, FBgn0010414, FBgn0015519, FBgn0017561, FBgn0024963, FBgn0028704, FBgn0029147, FBgn0029761, FBgn0030529, FBgn0031261, FBgn0031634, FBgn0032746, FBgn0033257, FBgn0036150, FBgn0036937, FBgn0038165, FBgn0038721, FBgn0039081, FBgn0040238, FBgn00535…	nAChRalpha1, eag, Grd, na, Sh, slo, trp, Rdl, porin, GluRIA, Shal, Nmdar1, SerT, nAChRalpha3, Ork1, GluClalpha, Nckx30C, NtR, SK, Clic, nAChRbeta3, Ir25a, CG10470, sand, Ir68a, Ir76b, Task6, subdued, Irk2, Best1, Nmdar2, Mid1, stg1, NaCP60E, OtopLc, CG42594, CG3638, Shab, Cngl, Ih, GluRIB, Ca-alpha1T, pHCl-1, Piezo, Trpm	Molecular_function	Down-regulated genes only
GO:0016836	hydro-lyase activity	32	10	5.61	0.04176	FBgn0000579, FBgn0024957, FBgn0025352, FBgn0027843, FBgn0027844, FBgn0028479, FBgn0032394, FBgn0033879, FBgn0037788, FBgn0039486	Eno, Irp-1B, Thiolase, CAH2, CAH1, Mtpalpha, Hacd1, Echs1, CAH7, CAH9	Molecular_function	Down-regulated genes only
GO:0022834	ligand-gated channel activity	47	18	8.24	0.04307	FBgn0000036, FBgn0001134, FBgn0004244, FBgn0004619, FBgn0010399, FBgn0015519, FBgn0024963, FBgn0029147, FBgn0031261, FBgn0031634, FBgn0036150, FBgn0036937, FBgn0039081, FBgn0053513, FBgn0263257, FBgn0264000, FBgn0264908, FBgn0265194	nAChRalpha1, Grd, Rdl, GluRIA, Nmdar1, nAChRalpha3, GluClalpha, NtR, nAChRbeta3, Ir25a, Ir68a, Ir76b, Irk2, Nmdar2, Cngl, GluRIB, pHCl-1, Trpm	Molecular_function	Down-regulated genes only
GO:0015276	ligand-gated ion channel activity	47	18	8.24	0.04307	FBgn0000036, FBgn0001134, FBgn0004244, FBgn0004619, FBgn0010399, FBgn0015519, FBgn0024963, FBgn0029147, FBgn0031261, FBgn0031634, FBgn0036150, FBgn0036937, FBgn0039081, FBgn0053513, FBgn0263257, FBgn0264000, FBgn0264908, FBgn0265194	nAChRalpha1, Grd, Rdl, GluRIA, Nmdar1, nAChRalpha3, GluClalpha, NtR, nAChRbeta3, Ir25a, Ir68a, Ir76b, Irk2, Nmdar2, Cngl, GluRIB, pHCl-1, Trpm	Molecular_function	Down-regulated genes only
GO:0005231	excitatory extracellular ligand-gated ion channel activity	12	5	2.1	0.04407	FBgn0000036, FBgn0001134, FBgn0015519, FBgn0024963, FBgn0031261	nAChRalpha1, Grd, nAChRalpha3, GluClalpha, nAChRbeta3	Molecular_function	Down-regulated genes only
GO:0008201	heparin binding	16	6	2.8	0.04689	FBgn0000108, FBgn0027111, FBgn0031850, FBgn0036494, FBgn0052183, FBgn0264089	Appl, miple1, Tsp, Toll-6, Ccn, sli	Molecular_function	Down-regulated genes only
GO:0004620	phospholipase activity	16	6	2.8	0.04689	FBgn0003656, FBgn0004045, FBgn0004047, FBgn0004611, FBgn0005391, FBgn0036939	sws, Yp1, Yp3, Plc21C, Yp2, CG7365	Molecular_function	Down-regulated genes only
GO:0043022	ribosome binding	20	7	3.51	0.04712	FBgn0003517, FBgn0004882, FBgn0015521, FBgn0020618, FBgn0034087, FBgn0034654, FBgn0038810	sta, orb, RpS21, Rack1, clu, eIF3k, Srp72	Molecular_function	Down-regulated genes only

## Sheet: Func_enrichment_table_Upregulat
GO.ID	GOTerm	Annotated genes	Significant	Enrichment	P-Value	ensembl_id	gene_symbol	GO_Group	Enrichment_for
GO:0006575	cellular modified amino acid metabolic process	72	29	10.53	4.4e-06	FBgn0001149, FBgn0010038, FBgn0010039, FBgn0010041, FBgn0010222, FBgn0010226, FBgn0020385, FBgn0026565, FBgn0028399, FBgn0029823, FBgn0030484, FBgn0031117, FBgn0032726, FBgn0032727, FBgn0032945, FBgn0034276, FBgn0037697, FBgn0038020, FBgn0038074, FBgn0040319, FBgn0040528, FBgn0042182, FBgn0042206, FBgn0050000, FBgn0050005, FBgn0085453, FBgn0250732, FBgn0261862, FBgn0263864	GstD1, GstD2, GstD3, GstD5, Nmdmc, GstS1, pug, Ass, TMS1, Shmt, GstT4, GstT3, CG10621, CG10623, CG8665, Sardh, GstZ2, GstD9, Gnmt, Gclc, CG15864, CG18749, GstD10, GstT1, GstT2, Mthfs, gfzf, whd, Dark	Biological_pathways	Up-regulated genes only
GO:0071897	DNA biosynthetic process	34	15	4.97	3.2e-05	FBgn0002891, FBgn0002914, FBgn0005655, FBgn0010173, FBgn0015664, FBgn0015799, FBgn0016983, FBgn0019890, FBgn0028360, FBgn0030506, FBgn0034728, FBgn0037141, FBgn0037554, FBgn0039260, FBgn0260962	mus205, Myb, PCNA, RpA-70, Dref, Rbf, smid, Smg5, Cdc7, DNAlig4, rad50, DNApol-eta, DNApol-iota, Smg6, pic	Biological_pathways	Up-regulated genes only
GO:0006950	response to stress	934	188	136.57	7.2e-05	FBgn0000261, FBgn0000541, FBgn0001222, FBgn0001224, FBgn0001225, FBgn0001230, FBgn0001247, FBgn0001297, FBgn0002887, FBgn0002891, FBgn0003068, FBgn0003082, FBgn0003134, FBgn0003447, FBgn0003459, FBgn0003721, FBgn0004512, FBgn0004575, FBgn0004698, FBgn0004913, FBgn0005632, FBgn0005655, FBgn0010015, FBgn0010173, FBgn0010226, FBgn0010379, FBgn0010385, FBgn0010812, FBgn0011274, FBgn0011296, FBgn00117…	Cat, E(bx), Hsf, Hsp23, Hsp26, Hsp68, Ide, kay, mus201, mus205, per, phr, Pp1alpha-96A, sn, stwl, Tm1, Mdr49, Syn, Xpc, Gnf1, faf, PCNA, CanA1, RpA-70, GstS1, Akt1, Def, unc-45, Dif, l(2)efl, Irbp, Hsp70Ba, MAPk-Ak2, Nf1, spel1, Rbf, spen, Gcn2, mre11, Idgf1, emb, Trxr-1, RhoGEF2, chico, Mekk1, flfl, DIP1, agt, IM2, CG6421, TTLL4A, Nipped-B, Dek, hang, XRCC1, Cdk5alpha, Cdc7, TotA, Nxt1, Usp1, CH…	Biological_pathways	Up-regulated genes only
GO:0046822	regulation of nucleocytoplasmic transport	22	11	3.22	9.3e-05	FBgn0000017, FBgn0002044, FBgn0002638, FBgn0003321, FBgn0010660, FBgn0020497, FBgn0021761, FBgn0024921, FBgn0026207, FBgn0039302, FBgn0264493	Abl, swm, Rcc1, sbr, Nup214, emb, Nup154, Tnpo, mbo, Nup358, rdx	Biological_pathways	Up-regulated genes only
GO:0000724	double-strand break repair via homologous recombination	41	15	6	0.00041	FBgn0002887, FBgn0002891, FBgn0010173, FBgn0020270, FBgn0026401, FBgn0028360, FBgn0032906, FBgn0037141, FBgn0037301, FBgn0037897, FBgn0052438, FBgn0261530, FBgn0265003, FBgn0266282, FBgn0266421	mus201, mus205, RpA-70, mre11, Nipped-B, Cdc7, RPA2, DNApol-eta, Mms19, CG5270, SMC5, nbs, koi, jnj, RPA3	Biological_pathways	Up-regulated genes only
GO:0000723	telomere maintenance	25	13	3.66	0.00049	FBgn0010173, FBgn0011774, FBgn0019890, FBgn0020270, FBgn0020412, FBgn0027508, FBgn0030506, FBgn0034728, FBgn0039260, FBgn0041627, FBgn0052685, FBgn0261530, FBgn0262524	RpA-70, Irbp, Smg5, mre11, JIL-1, Tnks, DNAlig4, rad50, Smg6, Ku80, ZAP3, nbs, ver	Biological_pathways	Up-regulated genes only
GO:0016226	iron-sulfur cluster assembly	16	8	2.34	0.00088	FBgn0001977, FBgn0032393, FBgn0032597, FBgn0035244, FBgn0037011, FBgn0037301, FBgn0037637, FBgn0051864	CIAPIN1, Nfs1, CG17904, ABCB7, CG4858, Mms19, IscU, Qtzl	Biological_pathways	Up-regulated genes only
GO:0090263	positive regulation of canonical Wnt signaling pathway	36	13	5.26	0.00113	FBgn0003134, FBgn0003415, FBgn0004380, FBgn0004889, FBgn0011481, FBgn0016977, FBgn0020496, FBgn0027508, FBgn0034372, FBgn0034709, FBgn0035153, FBgn0038862, FBgn0260635	Pp1alpha-96A, skd, Klp64D, tws, Ssdp, spen, CtBP, Tnks, Gint3, Swim, ebd1, Usp8, Diap1	Biological_pathways	Up-regulated genes only
GO:0009084	glutamine family amino acid biosynthetic process	10	6	1.46	0.00119	FBgn0001124, FBgn0001125, FBgn0026565, FBgn0037146, FBgn0038516, FBgn0261625	Got1, Got2, Ass, CG7470, P5cr-2, GLS	Biological_pathways	Up-regulated genes only
GO:0007097	nuclear migration	25	10	3.66	0.00172	FBgn0000283, FBgn0001308, FBgn0002525, FBgn0005632, FBgn0015754, FBgn0026620, FBgn0034447, FBgn0087035, FBgn0261836, FBgn0265003	Cp190, Khc, Lam, faf, Lis-1, tacc, CG7744, AGO2, Msp300, koi	Biological_pathways	Up-regulated genes only
GO:0006749	glutathione metabolic process	42	14	6.14	0.0018	FBgn0001149, FBgn0010038, FBgn0010039, FBgn0010041, FBgn0010226, FBgn0030484, FBgn0031117, FBgn0037697, FBgn0038020, FBgn0040319, FBgn0042206, FBgn0050000, FBgn0050005, FBgn0250732	GstD1, GstD2, GstD3, GstD5, GstS1, GstT4, GstT3, GstZ2, GstD9, Gclc, GstD10, GstT1, GstT2, gfzf	Biological_pathways	Up-regulated genes only
GO:0045892	negative regulation of transcription, DNA-templated	303	63	44.3	0.00184	FBgn0000283, FBgn0000568, FBgn0001222, FBgn0001308, FBgn0001978, FBgn0002525, FBgn0003068, FBgn0003334, FBgn0003430, FBgn0003459, FBgn0004656, FBgn0005617, FBgn0010762, FBgn0011274, FBgn0011604, FBgn0013469, FBgn0013746, FBgn0015799, FBgn0020309, FBgn0020412, FBgn0020496, FBgn0022764, FBgn0024291, FBgn0025456, FBgn0026080, FBgn0027499, FBgn0027553, FBgn0028387, FBgn0028979, FBgn0030093, FBgn00305…	Cp190, Eip75B, Hsf, Khc, stc, Lam, per, Scm, slp1, stwl, fs(1)h, msl-1, simj, Dif, Iswi, klu, alien, Rbf, crol, JIL-1, CtBP, Sin3A, Sirt1, CREG, Tip60, wde, NELF-B, chm, tio, Bap111, Pdcd4, insv, Daxx, wash, MESR4, Dcr-2, enok, CG2199, upSET, CG6843, CG14655, CG6254, Nelf-A, XNP, CG6066, CG12071, Spt5, Bap170, cbt, CG32767, Ino80, e(y)3, AGO2, rhea, dl, l(2)gd1, Mi-2, Sap130, AGO1, scrib, Su(z)2,…	Biological_pathways	Up-regulated genes only
GO:0045893	positive regulation of transcription, DNA-templated	337	68	49.28	0.00274	FBgn0000286, FBgn0000568, FBgn0001222, FBgn0001297, FBgn0002023, FBgn0002183, FBgn0002914, FBgn0003862, FBgn0004656, FBgn0005617, FBgn0011274, FBgn0011604, FBgn0014859, FBgn0015664, FBgn0016694, FBgn0020412, FBgn0020496, FBgn0022724, FBgn0023527, FBgn0025463, FBgn0026080, FBgn0026401, FBgn0027553, FBgn0028387, FBgn0030093, FBgn0030687, FBgn0030891, FBgn0031006, FBgn0031115, FBgn0031759, FBgn00318…	Cf2, Eip75B, Hsf, kay, Lim3, dre4, Myb, trx, fs(1)h, msl-1, Dif, Iswi, Hr38, Dref, Pdp1, JIL-1, CtBP, Taf8, CG3071, Bap60, Tip60, Nipped-B, NELF-B, chm, Bap111, RpIIIC160, Ada3, rictor, CG11710, lid, Daxx, CG4751, SCAP, Rcd1, MESR4, enok, ebd1, Ctr9, CG2199, srl, Fip1, Mms19, sage, MBD-R2, EloA, Nup98-96, CG13609, REPTOR, CG12071, Hcf, Spt5, Dlip3, Bap170, Setd3, CG32767, Nup153, l(2)k09022, e(y)…	Biological_pathways	Up-regulated genes only
GO:0006302	double-strand break repair	68	25	9.94	0.00315	FBgn0002887, FBgn0002891, FBgn0010173, FBgn0011774, FBgn0020270, FBgn0026401, FBgn0026533, FBgn0028360, FBgn0029825, FBgn0030506, FBgn0032906, FBgn0034728, FBgn0035996, FBgn0036126, FBgn0037141, FBgn0037301, FBgn0037897, FBgn0041627, FBgn0052438, FBgn0260817, FBgn0261113, FBgn0261530, FBgn0265003, FBgn0266282, FBgn0266421	mus201, mus205, RpA-70, Irbp, mre11, Nipped-B, Dek, Cdc7, CG12728, DNAlig4, RPA2, rad50, CG3448, Irbp18, DNApol-eta, Mms19, CG5270, Ku80, SMC5, gkt, Xrp1, nbs, koi, jnj, RPA3	Biological_pathways	Up-regulated genes only
GO:0008652	cellular amino acid biosynthetic process	38	16	5.56	0.00442	FBgn0000153, FBgn0001124, FBgn0001125, FBgn0001208, FBgn0003189, FBgn0014427, FBgn0020385, FBgn0026565, FBgn0029823, FBgn0031148, FBgn0032726, FBgn0032727, FBgn0037146, FBgn0038074, FBgn0038516, FBgn0261625	b, Got1, Got2, Hn, r, CG11899, pug, Ass, Shmt, Cbs, CG10621, CG10623, CG7470, Gnmt, P5cr-2, GLS	Biological_pathways	Up-regulated genes only
GO:0009066	aspartate family amino acid metabolic process	28	10	4.09	0.00457	FBgn0001124, FBgn0001125, FBgn0025720, FBgn0030653, FBgn0032726, FBgn0032727, FBgn0034276, FBgn0037684, FBgn0038074, FBgn0263864	Got1, Got2, Ate1, CG7860, CG10621, CG10623, Sardh, Srr, Gnmt, Dark	Biological_pathways	Up-regulated genes only
GO:0048488	synaptic vesicle endocytosis	42	13	6.14	0.00536	FBgn0000414, FBgn0001987, FBgn0010300, FBgn0013759, FBgn0016975, FBgn0016976, FBgn0023388, FBgn0034691, FBgn0038659, FBgn0038816, FBgn0038975, FBgn0051146, FBgn0261041	Dab, Gli, brat, CASK, stnB, stnA, Dap160, Synj, EndoA, Lrrk, Nrx-1, Nlg1, stj	Biological_pathways	Up-regulated genes only
GO:1901606	alpha-amino acid catabolic process	47	14	6.87	0.00575	FBgn0001125, FBgn0001208, FBgn0016013, FBgn0025720, FBgn0029823, FBgn0030653, FBgn0033543, FBgn0034276, FBgn0036992, FBgn0037684, FBgn0037697, FBgn0040211, FBgn0261625, FBgn0263864	Got2, Hn, Faa, Ate1, Shmt, CG7860, CG12338, Sardh, Hpd, Srr, GstZ2, hgo, GLS, Dark	Biological_pathways	Up-regulated genes only
GO:0007526	larval somatic muscle development	25	9	3.66	0.00663	FBgn0001994, FBgn0003415, FBgn0022764, FBgn0030855, FBgn0031759, FBgn0037659, FBgn0260442, FBgn0261238, FBgn0262527	crp, skd, Sin3A, CG5800, lid, Kdm2, rhea, Alh, nsl1	Biological_pathways	Up-regulated genes only
GO:0051668	localization within membrane	25	9	3.66	0.00663	FBgn0001308, FBgn0002121, FBgn0002525, FBgn0032447, FBgn0038975, FBgn0039004, FBgn0051146, FBgn0263289, FBgn0265416	Khc, l(2)gl, Lam, PICK1, Nrx-1, Nup133, Nlg1, scrib, Neto	Biological_pathways	Up-regulated genes only
GO:0018105	peptidyl-serine phosphorylation	43	13	6.29	0.00668	FBgn0000721, FBgn0003093, FBgn0010379, FBgn0013987, FBgn0020386, FBgn0020412, FBgn0026370, FBgn0028360, FBgn0030891, FBgn0038816, FBgn0039908, FBgn0261387, FBgn0263968	for, Pkc98E, Akt1, MAPk-Ak2, Pdk1, JIL-1, SRPK, Cdc7, Ada3, Lrrk, Asator, CG17528, nonC	Biological_pathways	Up-regulated genes only
GO:0006606	protein import into nucleus	43	13	6.29	0.00668	FBgn0002638, FBgn0010660, FBgn0021761, FBgn0024921, FBgn0026207, FBgn0028411, FBgn0037924, FBgn0039004, FBgn0039120, FBgn0039302, FBgn0061200, FBgn0262743, FBgn0264493	Rcc1, Nup214, Nup154, Tnpo, mbo, Nxt1, CG14712, Nup133, Nup98-96, Nup358, Nup153, Fs(2)Ket, rdx	Biological_pathways	Up-regulated genes only
GO:1902275	regulation of chromatin organization	88	22	12.87	0.00684	FBgn0000283, FBgn0002183, FBgn0002781, FBgn0005617, FBgn0010278, FBgn0020309, FBgn0020412, FBgn0024291, FBgn0024329, FBgn0025463, FBgn0027499, FBgn0030891, FBgn0035205, FBgn0036004, FBgn0036398, FBgn0037555, FBgn0037659, FBgn0042085, FBgn0087008, FBgn0260794, FBgn0263667, FBgn0265623	Cp190, dre4, mod(mdg4), msl-1, Ssrp, crol, JIL-1, Sirt1, Mekk1, Bap60, wde, Ada3, Ctr9, Jarid2, upSET, Ada2b, Kdm2, Bap170, e(y)3, ctrip, Lpt, Su(z)2	Biological_pathways	Up-regulated genes only
GO:0007549	dosage compensation	21	8	3.07	0.00704	FBgn0005617, FBgn0034246, FBgn0037926, FBgn0040273, FBgn0061200, FBgn0087035, FBgn0263352, FBgn0266083	msl-1, Dcr-2, Elp1, Spt5, Nup153, AGO2, Unr, ocm	Biological_pathways	Up-regulated genes only
GO:0051052	regulation of DNA metabolic process	58	16	8.48	0.00741	FBgn0005655, FBgn0015546, FBgn0015664, FBgn0015799, FBgn0016983, FBgn0019890, FBgn0026533, FBgn0027499, FBgn0027508, FBgn0028360, FBgn0028476, FBgn0037301, FBgn0038397, FBgn0039260, FBgn0052685, FBgn0263198	PCNA, spel1, Dref, Rbf, smid, Smg5, Dek, wde, Tnks, Cdc7, Usp1, Mms19, CG10185, Smg6, ZAP3, Acn	Biological_pathways	Up-regulated genes only
GO:0006915	apoptotic process	205	43	29.98	0.00786	FBgn0001075, FBgn0001977, FBgn0002781, FBgn0004797, FBgn0005672, FBgn0010379, FBgn0015546, FBgn0015664, FBgn0015799, FBgn0020386, FBgn0021761, FBgn0024291, FBgn0024329, FBgn0024913, FBgn0026080, FBgn0027491, FBgn0029891, FBgn0031263, FBgn0031683, FBgn0031820, FBgn0034246, FBgn0034366, FBgn0037643, FBgn0039016, FBgn0039338, FBgn0039593, FBgn0040294, FBgn0042693, FBgn0051216, FBgn0052176, FBgn00861…	ft, CIAPIN1, mod(mdg4), mdy, spi, Akt1, spel1, Dref, Rbf, Pdk1, Nup154, Sirt1, Mekk1, Actbeta, Tip60, Cdk5alpha, Pink1, Tspo, CG4230, Daxx, Dcr-2, Atg7, ScsbetaA, Dcr-1, XNP, Sid, POSH, wrd, Naam, CG32176, snama, CG41520, Clbn, Diap1, Tango9, Atg13, Cul3, Opa1, nbs, Acn, Dark, rdx, Bruce	Biological_pathways	Up-regulated genes only
GO:0006405	RNA export from nucleus	44	13	6.43	0.00824	FBgn0002044, FBgn0003321, FBgn0010660, FBgn0014189, FBgn0020497, FBgn0023542, FBgn0026207, FBgn0028411, FBgn0037382, FBgn0039004, FBgn0039120, FBgn0039302, FBgn0263232	swm, sbr, Nup214, Hel25E, emb, Nmd3, mbo, Nxt1, Hpr1, Nup133, Nup98-96, Nup358, Nxf3	Biological_pathways	Up-regulated genes only
GO:0008152	metabolic process	4151	679	606.96	0.00844	FBgn0000017, FBgn0000046, FBgn0000052, FBgn0000053, FBgn0000078, FBgn0000153, FBgn0000246, FBgn0000261, FBgn0000283, FBgn0000286, FBgn0000289, FBgn0000395, FBgn0000406, FBgn0000541, FBgn0000568, FBgn0000581, FBgn0000721, FBgn0001075, FBgn0001112, FBgn0001124, FBgn0001125, FBgn0001149, FBgn0001186, FBgn0001187, FBgn0001208, FBgn0001222, FBgn0001247, FBgn0001258, FBgn0001297, FBgn0001308, FBgn00013…	Abl, Act87E, Pfas, Gart, Amy-d, b, c(3)G, Cat, Cp190, Cf2, cg, cv-2, Cyt-b5-r, E(bx), Eip75B, E(Pc), for, ft, Gld, Got1, Got2, GstD1, Hex-A, Hex-C, Hn, Hsf, Ide, Ldh, kay, Khc, kz, CIAPIN1, stc, crp, Lim3, CG10561, swm, l(2)gl, dre4, Lam, mal, mus201, mus205, Myb, per, phr, Pkc98E, Pp1alpha-96A, r, RpII215, sbr, Scm, skd, slp1, stwl, sol, sr, st, trx, Ubi-p63E, HmgD, RpIII128, fs(1)h, Xpc, mdy, t…	Biological_pathways	Up-regulated genes only
GO:0010970	transport along microtubule	54	15	7.9	0.00876	FBgn0001308, FBgn0004380, FBgn0004381, FBgn0015589, FBgn0015754, FBgn0019968, FBgn0029870, FBgn0029891, FBgn0034447, FBgn0035317, FBgn0038358, FBgn0038816, FBgn0046704, FBgn0260933, FBgn0267002	Khc, Klp64D, Klp68D, Apc, Lis-1, Khc-73, Marf, Pink1, CG7744, Oseg2, Ttc26, Lrrk, Liprin-alpha, rempA, unc-104	Biological_pathways	Up-regulated genes only
GO:1903312	negative regulation of mRNA metabolic process	10	5	1.46	0.00879	FBgn0002044, FBgn0011206, FBgn0016978, FBgn0028471, FBgn0262732	swm, bol, snRNP-U1-70K, Nab2, mbf1	Biological_pathways	Up-regulated genes only
GO:0016233	telomere capping	10	5	1.46	0.00879	FBgn0020270, FBgn0027508, FBgn0034728, FBgn0261530, FBgn0262524	mre11, Tnks, rad50, nbs, ver	Biological_pathways	Up-regulated genes only
GO:0009074	aromatic amino acid family catabolic process	10	5	1.46	0.00879	FBgn0001208, FBgn0016013, FBgn0036992, FBgn0037697, FBgn0040211	Hn, Faa, Hpd, GstZ2, hgo	Biological_pathways	Up-regulated genes only
GO:0032784	regulation of DNA-templated transcription, elongation	26	9	3.8	0.00886	FBgn0000286, FBgn0002183, FBgn0003862, FBgn0004656, FBgn0027553, FBgn0037382, FBgn0038872, FBgn0039066, FBgn0040273	Cf2, dre4, trx, fs(1)h, NELF-B, Hpr1, Nelf-A, EloA, Spt5	Biological_pathways	Up-regulated genes only
GO:0043487	regulation of RNA stability	14	6	2.05	0.0101	FBgn0011206, FBgn0016070, FBgn0028471, FBgn0036661, FBgn0039260, FBgn0262732	bol, smg, Nab2, CG9705, Smg6, mbf1	Biological_pathways	Up-regulated genes only
GO:0006338	chromatin remodeling	102	24	14.91	0.01071	FBgn0000046, FBgn0000541, FBgn0000581, FBgn0004362, FBgn0011604, FBgn0014189, FBgn0020388, FBgn0020496, FBgn0024329, FBgn0025463, FBgn0026080, FBgn0026427, FBgn0027490, FBgn0030093, FBgn0030891, FBgn0031759, FBgn0032348, FBgn0036004, FBgn0037555, FBgn0039904, FBgn0053554, FBgn0061200, FBgn0086613, FBgn0262519	Act87E, E(bx), E(Pc), HmgD, Iswi, Hel25E, Gcn5, CtBP, Mekk1, Bap60, Tip60, Su(var)2-HP2, D12, Bap111, Ada3, lid, CG4751, Jarid2, Ada2b, Hcf, Nipped-A, Nup153, Ino80, Mi-2	Biological_pathways	Up-regulated genes only
GO:0044248	cellular catabolic process	719	132	105.13	0.01148	FBgn0000153, FBgn0000261, FBgn0001125, FBgn0001186, FBgn0001187, FBgn0001208, FBgn0001247, FBgn0002036, FBgn0003943, FBgn0005632, FBgn0010300, FBgn0010379, FBgn0011206, FBgn0013770, FBgn0016013, FBgn0016070, FBgn0017551, FBgn0019890, FBgn0021814, FBgn0024248, FBgn0024698, FBgn0025454, FBgn0025720, FBgn0026176, FBgn0027508, FBgn0028471, FBgn0028476, FBgn0028497, FBgn0028671, FBgn0028978, FBgn00290…	b, Cat, Got2, Hex-A, Hex-C, Hn, Ide, CG10561, Ubi-p63E, faf, brat, Akt1, bol, Cp1, Faa, smg, Rca1, Smg5, Vps28, chico, Cpsf160, Cyp6g1, Ate1, SkpB, Tnks, Nab2, Usp1, CG3530, Vha100-1, trbl, Smurf, REG, Shmt, Pink1, UbcE2H, CG2247, CtsB1, hiw, dob, CG7860, CG9125, Ubr1, Usp2, Atg4a, CG15412, CG2818, CG9527, Ufd4, Atg18b, CG8665, Cul2, Etf-QO, Prx2540-2, CG11883, CG12338, PI31, CG4847, Dcr-2, Sardh…	Biological_pathways	Up-regulated genes only
GO:0006310	DNA recombination	64	23	9.36	0.01229	FBgn0000246, FBgn0002887, FBgn0002891, FBgn0004698, FBgn0010173, FBgn0015546, FBgn0020270, FBgn0026401, FBgn0028360, FBgn0030506, FBgn0032906, FBgn0034728, FBgn0035996, FBgn0037141, FBgn0037301, FBgn0037897, FBgn0041627, FBgn0052438, FBgn0261530, FBgn0263198, FBgn0265003, FBgn0266282, FBgn0266421	c(3)G, mus201, mus205, Xpc, RpA-70, spel1, mre11, Nipped-B, Cdc7, DNAlig4, RPA2, rad50, CG3448, DNApol-eta, Mms19, CG5270, Ku80, SMC5, nbs, Acn, koi, jnj, RPA3	Biological_pathways	Up-regulated genes only
GO:0033157	regulation of intracellular protein transport	23	8	3.36	0.01297	FBgn0000017, FBgn0010660, FBgn0015589, FBgn0020497, FBgn0021761, FBgn0024921, FBgn0026207, FBgn0264493	Abl, Nup214, Apc, emb, Nup154, Tnpo, mbo, rdx	Biological_pathways	Up-regulated genes only
GO:0006955	immune response	229	46	33.48	0.01353	FBgn0000541, FBgn0000568, FBgn0001247, FBgn0001297, FBgn0002525, FBgn0003134, FBgn0005632, FBgn0005655, FBgn0010015, FBgn0010385, FBgn0010812, FBgn0011274, FBgn0016696, FBgn0024248, FBgn0024329, FBgn0026207, FBgn0027491, FBgn0028411, FBgn0031187, FBgn0031216, FBgn0031317, FBgn0031973, FBgn0032256, FBgn0034246, FBgn0034709, FBgn0036448, FBgn0036844, FBgn0037116, FBgn0037556, FBgn0040294, FBgn00403…	E(bx), Eip75B, Ide, kay, Lam, Pp1alpha-96A, faf, PCNA, CanA1, Def, unc-45, Dif, Pitslre, chico, Mekk1, mbo, Cdk5alpha, Nxt1, Usp2, Zir, Charon, Spn28Dc, RluA-2, Dcr-2, Swim, mop, Mkp3, Als2, CG9636, POSH, GNBP3, Dlip3, IM4, Tep4, Tep2, HBS1, PGRP-SB1, DPCoAC, dl, par-1, Exn, Gprk2, Ect4, Dark, sima, Sec5	Biological_pathways	Up-regulated genes only
GO:1901360	organic cyclic compound metabolic process	2010	364	293.9	0.01367	FBgn0000052, FBgn0000053, FBgn0000153, FBgn0000246, FBgn0000283, FBgn0000286, FBgn0000289, FBgn0000395, FBgn0000541, FBgn0000568, FBgn0001186, FBgn0001187, FBgn0001208, FBgn0001222, FBgn0001297, FBgn0001308, FBgn0001330, FBgn0001978, FBgn0001994, FBgn0002023, FBgn0002044, FBgn0002183, FBgn0002525, FBgn0002641, FBgn0002887, FBgn0002891, FBgn0002914, FBgn0003068, FBgn0003082, FBgn0003189, FBgn00032…	Pfas, Gart, b, c(3)G, Cp190, Cf2, cg, cv-2, E(bx), Eip75B, Hex-A, Hex-C, Hn, Hsf, kay, Khc, kz, stc, crp, Lim3, swm, dre4, Lam, mal, mus201, mus205, Myb, per, phr, r, RpII215, Scm, skd, slp1, stwl, st, trx, HmgD, RpIII128, fs(1)h, Xpc, Gnf1, msl-1, PCNA, RpA-70, Dbp45A, Nmdmc, brat, simj, Ref1, TrpRS, l(3)07882, bol, heph, Dif, Ssdp, Iswi, La, DNApol-alpha50, Fdx1, Irbp, Gem3, klu, alien, Hel25E,…	Biological_pathways	Up-regulated genes only
GO:0034243	regulation of transcription elongation from RNA polymerase II promoter	19	7	2.78	0.01415	FBgn0000286, FBgn0002183, FBgn0003862, FBgn0004656, FBgn0027553, FBgn0038872, FBgn0039066	Cf2, dre4, trx, fs(1)h, NELF-B, Nelf-A, EloA	Biological_pathways	Up-regulated genes only
GO:0043094	cellular metabolic compound salvage	11	5	1.61	0.01421	FBgn0022029, FBgn0031589, FBgn0036337, FBgn0052626, FBgn0085484	l(2)k01209, Naprt, AdenoK, AMPdeam, Pdxk	Biological_pathways	Up-regulated genes only
GO:0006144	purine nucleobase metabolic process	11	5	1.61	0.01421	FBgn0000052, FBgn0000053, FBgn0020385, FBgn0029823, FBgn0038349	Pfas, Gart, pug, Shmt, AOX3	Biological_pathways	Up-regulated genes only
GO:0051707	response to other organism	295	57	43.13	0.01436	FBgn0000568, FBgn0001222, FBgn0001247, FBgn0001297, FBgn0003134, FBgn0005632, FBgn0005655, FBgn0010385, FBgn0010812, FBgn0011274, FBgn0015222, FBgn0016696, FBgn0016977, FBgn0024807, FBgn0025583, FBgn0025827, FBgn0026207, FBgn0028396, FBgn0028411, FBgn0029765, FBgn0030320, FBgn0031187, FBgn0031317, FBgn0031561, FBgn0032256, FBgn0033980, FBgn0034162, FBgn0034246, FBgn0034366, FBgn0034511, FBgn00352…	Eip75B, Hsf, Ide, kay, Pp1alpha-96A, faf, PCNA, Def, unc-45, Dif, Fer1HCH, Pitslre, spen, DIP1, IM2, CG6421, mbo, TotA, Nxt1, CG16756, CG2247, Usp2, Charon, IM33, RluA-2, Cyp6a20, CG6426, Dcr-2, Atg7, GNBP-like3, CG12004, Drsl5, Fit1, FoxK, mop, CG7408, Nup98-96, Sid, Diedel, POSH, GNBP3, IM4, Tep4, Tep2, HBS1, PGRP-SB1, TotC, CG6429, DPCoAC, IM14, CG34215, AGO2, dl, par-1, pic, Gprk2, coro	Biological_pathways	Up-regulated genes only
GO:0043207	response to external biotic stimulus	295	57	43.13	0.01436	FBgn0000568, FBgn0001222, FBgn0001247, FBgn0001297, FBgn0003134, FBgn0005632, FBgn0005655, FBgn0010385, FBgn0010812, FBgn0011274, FBgn0015222, FBgn0016696, FBgn0016977, FBgn0024807, FBgn0025583, FBgn0025827, FBgn0026207, FBgn0028396, FBgn0028411, FBgn0029765, FBgn0030320, FBgn0031187, FBgn0031317, FBgn0031561, FBgn0032256, FBgn0033980, FBgn0034162, FBgn0034246, FBgn0034366, FBgn0034511, FBgn00352…	Eip75B, Hsf, Ide, kay, Pp1alpha-96A, faf, PCNA, Def, unc-45, Dif, Fer1HCH, Pitslre, spen, DIP1, IM2, CG6421, mbo, TotA, Nxt1, CG16756, CG2247, Usp2, Charon, IM33, RluA-2, Cyp6a20, CG6426, Dcr-2, Atg7, GNBP-like3, CG12004, Drsl5, Fit1, FoxK, mop, CG7408, Nup98-96, Sid, Diedel, POSH, GNBP3, IM4, Tep4, Tep2, HBS1, PGRP-SB1, TotC, CG6429, DPCoAC, IM14, CG34215, AGO2, dl, par-1, pic, Gprk2, coro	Biological_pathways	Up-regulated genes only
GO:0009607	response to biotic stimulus	295	57	43.13	0.01436	FBgn0000568, FBgn0001222, FBgn0001247, FBgn0001297, FBgn0003134, FBgn0005632, FBgn0005655, FBgn0010385, FBgn0010812, FBgn0011274, FBgn0015222, FBgn0016696, FBgn0016977, FBgn0024807, FBgn0025583, FBgn0025827, FBgn0026207, FBgn0028396, FBgn0028411, FBgn0029765, FBgn0030320, FBgn0031187, FBgn0031317, FBgn0031561, FBgn0032256, FBgn0033980, FBgn0034162, FBgn0034246, FBgn0034366, FBgn0034511, FBgn00352…	Eip75B, Hsf, Ide, kay, Pp1alpha-96A, faf, PCNA, Def, unc-45, Dif, Fer1HCH, Pitslre, spen, DIP1, IM2, CG6421, mbo, TotA, Nxt1, CG16756, CG2247, Usp2, Charon, IM33, RluA-2, Cyp6a20, CG6426, Dcr-2, Atg7, GNBP-like3, CG12004, Drsl5, Fit1, FoxK, mop, CG7408, Nup98-96, Sid, Diedel, POSH, GNBP3, IM4, Tep4, Tep2, HBS1, PGRP-SB1, TotC, CG6429, DPCoAC, IM14, CG34215, AGO2, dl, par-1, pic, Gprk2, coro	Biological_pathways	Up-regulated genes only
GO:1903827	regulation of cellular protein localization	47	13	6.87	0.0147	FBgn0000017, FBgn0002525, FBgn0010660, FBgn0015589, FBgn0015799, FBgn0020497, FBgn0021761, FBgn0024921, FBgn0026207, FBgn0026401, FBgn0039302, FBgn0262519, FBgn0264493	Abl, Lam, Nup214, Apc, Rbf, emb, Nup154, Tnpo, mbo, Nipped-B, Nup358, Mi-2, rdx	Biological_pathways	Up-regulated genes only
GO:0043491	protein kinase B signaling	15	6	2.19	0.01479	FBgn0020386, FBgn0024248, FBgn0028978, FBgn0031006, FBgn0033935, FBgn0264691	Pdk1, chico, trbl, rictor, Sin1, Lst8	Biological_pathways	Up-regulated genes only
GO:0051101	regulation of DNA binding	15	6	2.19	0.01479	FBgn0001222, FBgn0003068, FBgn0010278, FBgn0015799, FBgn0026401, FBgn0262519	Hsf, per, Ssrp, Rbf, Nipped-B, Mi-2	Biological_pathways	Up-regulated genes only
GO:0043966	histone H3 acetylation	28	9	4.09	0.01493	FBgn0003862, FBgn0020388, FBgn0028387, FBgn0030891, FBgn0031759, FBgn0034975, FBgn0037555, FBgn0039904, FBgn0053554	trx, Gcn5, chm, Ada3, lid, enok, Ada2b, Hcf, Nipped-A	Biological_pathways	Up-regulated genes only
GO:0006979	response to oxidative stress	116	26	16.96	0.01526	FBgn0000261, FBgn0003068, FBgn0010015, FBgn0010226, FBgn0010379, FBgn0015269, FBgn0024329, FBgn0026575, FBgn0028396, FBgn0029891, FBgn0030876, FBgn0031589, FBgn0031820, FBgn0031971, FBgn0032935, FBgn0033518, FBgn0034897, FBgn0036053, FBgn0037248, FBgn0038465, FBgn0039003, FBgn0039593, FBgn0044812, FBgn0051216, FBgn0086361, FBgn0261862	Cat, per, CanA1, GstS1, Akt1, Nf1, Mekk1, hang, TotA, Pink1, CG6762, Naprt, Daxx, Sirup, Atg18b, Prx2540-2, Sesn, iPLA2-VIA, srl, Irc, wfs1, Sid, TotC, Naam, alph, whd	Biological_pathways	Up-regulated genes only
GO:1901607	alpha-amino acid biosynthetic process	34	14	4.97	0.01658	FBgn0001124, FBgn0001125, FBgn0001208, FBgn0003189, FBgn0014427, FBgn0026565, FBgn0029823, FBgn0031148, FBgn0032726, FBgn0032727, FBgn0037146, FBgn0038074, FBgn0038516, FBgn0261625	Got1, Got2, Hn, r, CG11899, Ass, Shmt, Cbs, CG10621, CG10623, CG7470, Gnmt, P5cr-2, GLS	Biological_pathways	Up-regulated genes only
GO:0045935	positive regulation of nucleobase-containing compound metabolic process	366	77	53.52	0.01673	FBgn0000286, FBgn0000568, FBgn0001222, FBgn0001297, FBgn0002023, FBgn0002183, FBgn0002914, FBgn0003862, FBgn0004656, FBgn0005617, FBgn0011274, FBgn0011604, FBgn0014859, FBgn0015664, FBgn0016070, FBgn0016694, FBgn0016983, FBgn0020412, FBgn0020496, FBgn0022724, FBgn0023527, FBgn0025463, FBgn0025741, FBgn0026080, FBgn0026401, FBgn0027499, FBgn0027508, FBgn0027553, FBgn0028360, FBgn0028387, FBgn00300…	Cf2, Eip75B, Hsf, kay, Lim3, dre4, Myb, trx, fs(1)h, msl-1, Dif, Iswi, Hr38, Dref, smg, Pdp1, smid, JIL-1, CtBP, Taf8, CG3071, Bap60, PlexA, Tip60, Nipped-B, wde, Tnks, NELF-B, Cdc7, chm, Bap111, RpIIIC160, Ada3, rictor, CG11710, lid, Daxx, CG4751, RtcB, SCAP, Rcd1, MESR4, enok, ebd1, Ctr9, CG2199, barc, srl, Fip1, Mms19, Tailor, sage, MBD-R2, EloA, Nup98-96, CG13609, REPTOR, CG12071, Hcf, Spt5, …	Biological_pathways	Up-regulated genes only
GO:0006289	nucleotide-excision repair	24	8	3.51	0.01702	FBgn0002887, FBgn0004698, FBgn0005655, FBgn0010173, FBgn0030506, FBgn0032906, FBgn0263600, FBgn0266421	mus201, Xpc, PCNA, RpA-70, DNAlig4, RPA2, DNApol-delta, RPA3	Biological_pathways	Up-regulated genes only
GO:0090087	regulation of peptide transport	53	14	7.75	0.01743	FBgn0000017, FBgn0010379, FBgn0010660, FBgn0015589, FBgn0020497, FBgn0021761, FBgn0024921, FBgn0026207, FBgn0034140, FBgn0036448, FBgn0259824, FBgn0264493, FBgn0264607, FBgn0267002	Abl, Akt1, Nup214, Apc, emb, Nup154, Tnpo, mbo, Lst, mop, Hip14, rdx, CaMKII, unc-104	Biological_pathways	Up-regulated genes only
GO:0031323	regulation of cellular metabolic process	1469	269	214.8	0.01794	FBgn0000283, FBgn0000286, FBgn0000289, FBgn0000395, FBgn0000541, FBgn0000568, FBgn0001222, FBgn0001247, FBgn0001297, FBgn0001308, FBgn0001978, FBgn0001994, FBgn0002023, FBgn0002044, FBgn0002121, FBgn0002183, FBgn0002525, FBgn0002914, FBgn0003068, FBgn0003334, FBgn0003415, FBgn0003430, FBgn0003459, FBgn0003862, FBgn0004362, FBgn0004656, FBgn0005617, FBgn0005632, FBgn0005655, FBgn0005672, FBgn00102…	Cp190, Cf2, cg, cv-2, E(bx), Eip75B, Hsf, Ide, kay, Khc, stc, crp, Lim3, swm, l(2)gl, dre4, Lam, Myb, per, Scm, skd, slp1, stwl, trx, HmgD, fs(1)h, msl-1, faf, PCNA, spi, Dbp45A, Ssrp, brat, Akt1, simj, bol, heph, Dif, l(2)efl, Ssdp, Iswi, Fdx1, klu, alien, MAPk-Ak2, Hel25E, Hr38, spel1, Dref, Lis-1, Rbf, smg, vri, PTP-ER, Pdp1, spen, snRNP-U1-70K, smid, Rca1, Smg5, Gcn2, crol, Gcn5, JIL-1, CtBP,…	Biological_pathways	Up-regulated genes only
GO:1901701	cellular response to oxygen-containing compound	129	28	18.86	0.01847	FBgn0000541, FBgn0010379, FBgn0011604, FBgn0014859, FBgn0020386, FBgn0024248, FBgn0024291, FBgn0028978, FBgn0029823, FBgn0030795, FBgn0031006, FBgn0031971, FBgn0032447, FBgn0033935, FBgn0034140, FBgn0034897, FBgn0035538, FBgn0037248, FBgn0039003, FBgn0039120, FBgn0042693, FBgn0044047, FBgn0085484, FBgn0263593, FBgn0263667, FBgn0264691, FBgn0266064, FBgn0266411	E(bx), Akt1, Iswi, Hr38, Pdk1, chico, Sirt1, trbl, Shmt, ppk28, rictor, Sirup, PICK1, Sin1, Lst, Sesn, DopEcR, srl, wfs1, Nup98-96, wrd, Ilp6, Pdxk, Lpin, Lpt, Lst8, GlyS, sima	Biological_pathways	Up-regulated genes only
GO:0060548	negative regulation of cell death	107	24	15.65	0.01909	FBgn0001977, FBgn0005672, FBgn0010379, FBgn0014073, FBgn0015589, FBgn0015799, FBgn0020386, FBgn0026080, FBgn0029891, FBgn0031683, FBgn0034366, FBgn0035713, FBgn0038816, FBgn0040294, FBgn0042693, FBgn0051216, FBgn0052176, FBgn0085451, FBgn0087011, FBgn0260635, FBgn0260744, FBgn0261276, FBgn0266579, FBgn0266717	CIAPIN1, spi, Akt1, Tie, Apc, Rbf, Pdk1, Tip60, Pink1, CG4230, Atg7, velo, Lrrk, POSH, wrd, Naam, CG32176, htk, CG41520, Diap1, Tango9, Opa1, tau, Bruce	Biological_pathways	Up-regulated genes only
GO:0033554	cellular response to stress	490	101	71.65	0.01951	FBgn0000261, FBgn0001222, FBgn0001230, FBgn0001297, FBgn0002887, FBgn0002891, FBgn0003082, FBgn0003459, FBgn0004698, FBgn0004913, FBgn0005655, FBgn0010173, FBgn0010379, FBgn0010812, FBgn0011296, FBgn0011774, FBgn0013278, FBgn0013987, FBgn0015546, FBgn0015799, FBgn0019990, FBgn0020270, FBgn0020497, FBgn0024248, FBgn0024329, FBgn0024555, FBgn0024912, FBgn0026401, FBgn0026533, FBgn0026751, FBgn00274…	Cat, Hsf, Hsp68, kay, mus201, mus205, phr, stwl, Xpc, Gnf1, PCNA, RpA-70, Akt1, unc-45, l(2)efl, Irbp, Hsp70Ba, MAPk-Ak2, spel1, Rbf, Gcn2, mre11, emb, chico, Mekk1, flfl, agt, Nipped-B, Dek, XRCC1, Cdk5alpha, Cdc7, TotA, Usp1, CHES-1-like, CG12728, Marf, DNAlig4, CG6762, rictor, Cbs, Sirup, RPA2, Atg18b, SCAP, Gadd45, Prx2540-2, Lst, MESR4, Atg7, rad50, Sesn, DopEcR, CG7376, CG3448, Irbp18, DNAp…	Biological_pathways	Up-regulated genes only
GO:0046777	protein autophosphorylation	34	10	4.97	0.02008	FBgn0000017, FBgn0013987, FBgn0015664, FBgn0020412, FBgn0037679, FBgn0042693, FBgn0044826, FBgn0261387, FBgn0263968, FBgn0264607	Abl, MAPk-Ak2, Dref, JIL-1, Aduk, wrd, Pak3, CG17528, nonC, CaMKII	Biological_pathways	Up-regulated genes only
GO:0034728	nucleosome organization	49	13	7.16	0.02078	FBgn0000046, FBgn0000541, FBgn0000581, FBgn0002183, FBgn0011604, FBgn0014857, FBgn0026080, FBgn0031820, FBgn0034975, FBgn0039338, FBgn0053554, FBgn0086613, FBgn0262519	Act87E, E(bx), E(Pc), dre4, Iswi, His3.3B, Tip60, Daxx, enok, XNP, Nipped-A, Ino80, Mi-2	Biological_pathways	Up-regulated genes only
GO:0030727	germarium-derived female germ-line cyst formation	16	6	2.34	0.0208	FBgn0013746, FBgn0015754, FBgn0030520, FBgn0039016, FBgn0262527, FBgn0262739	alien, Lis-1, Pdcd4, Dcr-1, nsl1, AGO1	Biological_pathways	Up-regulated genes only
GO:0008089	anterograde axonal transport	12	5	1.75	0.02147	FBgn0001308, FBgn0004380, FBgn0004381, FBgn0046704, FBgn0267002	Khc, Klp64D, Klp68D, Liprin-alpha, unc-104	Biological_pathways	Up-regulated genes only
GO:0043488	regulation of mRNA stability	12	5	1.75	0.02147	FBgn0011206, FBgn0016070, FBgn0028471, FBgn0036661, FBgn0262732	bol, smg, Nab2, CG9705, mbf1	Biological_pathways	Up-regulated genes only
GO:0043113	receptor clustering	12	5	1.75	0.02147	FBgn0032447, FBgn0038975, FBgn0051146, FBgn0263289, FBgn0265416	PICK1, Nrx-1, Nlg1, scrib, Neto	Biological_pathways	Up-regulated genes only
GO:1900180	regulation of protein localization to nucleus	12	5	1.75	0.02147	FBgn0002525, FBgn0021761, FBgn0024921, FBgn0039302, FBgn0264493	Lam, Nup154, Tnpo, Nup358, rdx	Biological_pathways	Up-regulated genes only
GO:0080090	regulation of primary metabolic process	1414	260	206.76	0.02178	FBgn0000283, FBgn0000286, FBgn0000289, FBgn0000395, FBgn0000541, FBgn0000568, FBgn0001222, FBgn0001247, FBgn0001297, FBgn0001308, FBgn0001978, FBgn0001994, FBgn0002023, FBgn0002044, FBgn0002121, FBgn0002183, FBgn0002525, FBgn0002914, FBgn0003068, FBgn0003334, FBgn0003415, FBgn0003430, FBgn0003459, FBgn0003862, FBgn0004362, FBgn0004656, FBgn0005617, FBgn0005632, FBgn0005655, FBgn0005672, FBgn00102…	Cp190, Cf2, cg, cv-2, E(bx), Eip75B, Hsf, Ide, kay, Khc, stc, crp, Lim3, swm, l(2)gl, dre4, Lam, Myb, per, Scm, skd, slp1, stwl, trx, HmgD, fs(1)h, msl-1, faf, PCNA, spi, Dbp45A, Ssrp, brat, Akt1, simj, bol, heph, Dif, l(2)efl, Ssdp, Iswi, Fdx1, klu, alien, MAPk-Ak2, Hel25E, Hr38, spel1, Apc, Dref, Lis-1, Rbf, smg, vri, PTP-ER, Pdp1, spen, snRNP-U1-70K, smid, Rca1, Smg5, Gcn2, crol, Gcn5, JIL-1, …	Biological_pathways	Up-regulated genes only
GO:0097193	intrinsic apoptotic signaling pathway	25	8	3.66	0.0219	FBgn0015546, FBgn0015799, FBgn0024329, FBgn0027491, FBgn0039338, FBgn0259152, FBgn0261276, FBgn0261530	spel1, Rbf, Mekk1, Cdk5alpha, XNP, Clbn, Opa1, nbs	Biological_pathways	Up-regulated genes only
GO:0006357	regulation of transcription by RNA polymerase II	525	93	76.77	0.02347	FBgn0000286, FBgn0000395, FBgn0000541, FBgn0000568, FBgn0001222, FBgn0001297, FBgn0001978, FBgn0001994, FBgn0002023, FBgn0002183, FBgn0002914, FBgn0003068, FBgn0003415, FBgn0003430, FBgn0003862, FBgn0004362, FBgn0004656, FBgn0010762, FBgn0011274, FBgn0011481, FBgn0011604, FBgn0013469, FBgn0014859, FBgn0015664, FBgn0015754, FBgn0015799, FBgn0016694, FBgn0020309, FBgn0020496, FBgn0022724, FBgn00227…	Cf2, cv-2, E(bx), Eip75B, Hsf, kay, stc, crp, Lim3, dre4, Myb, per, skd, slp1, trx, HmgD, fs(1)h, simj, Dif, Ssdp, Iswi, klu, Hr38, Dref, Lis-1, Rbf, Pdp1, crol, CtBP, Taf8, Hel89B, CREG, Bap60, Tip60, Nipped-B, NELF-B, chm, tio, Smurf, CG3726, hiw, Ada3, Cul2, SCAP, CG18011, Rcd1, MESR4, enok, MED14, ebd1, Ctr9, CG2199, MED4, ERR, CG5830, RAF2, MED1, srl, Fip1, CG14655, Ada2b, sage, Elp1, MBD-R2…	Biological_pathways	Up-regulated genes only
GO:0006974	cellular response to DNA damage stimulus	173	48	25.3	0.02369	FBgn0002887, FBgn0002891, FBgn0003082, FBgn0004698, FBgn0004913, FBgn0005655, FBgn0010173, FBgn0011774, FBgn0015546, FBgn0015799, FBgn0019990, FBgn0020270, FBgn0024555, FBgn0024912, FBgn0026401, FBgn0026533, FBgn0026751, FBgn0028360, FBgn0028476, FBgn0029504, FBgn0029825, FBgn0030506, FBgn0032906, FBgn0034728, FBgn0035689, FBgn0035996, FBgn0036126, FBgn0037141, FBgn0037301, FBgn0037554, FBgn00378…	mus201, mus205, phr, Xpc, Gnf1, PCNA, RpA-70, Irbp, spel1, Rbf, Gcn2, mre11, flfl, agt, Nipped-B, Dek, XRCC1, Cdc7, Usp1, CHES-1-like, CG12728, DNAlig4, RPA2, rad50, CG7376, CG3448, Irbp18, DNApol-eta, Mms19, DNApol-iota, CG5270, obe, Ku80, SMC5, Nipped-A, Ino80, Clbn, ctrip, gkt, pic, Xrp1, grp, nbs, DNApol-delta, nonC, koi, jnj, RPA3	Biological_pathways	Up-regulated genes only
GO:0050808	synapse organization	267	51	39.04	0.02425	FBgn0000017, FBgn0000044, FBgn0001125, FBgn0001297, FBgn0001987, FBgn0004575, FBgn0010300, FBgn0010379, FBgn0010762, FBgn0011802, FBgn0013759, FBgn0015269, FBgn0015803, FBgn0019985, FBgn0020386, FBgn0026015, FBgn0026080, FBgn0030600, FBgn0030706, FBgn0031006, FBgn0032447, FBgn0032956, FBgn0033935, FBgn0034691, FBgn0035437, FBgn0035713, FBgn0036544, FBgn0037555, FBgn0038816, FBgn0038975, FBgn00392…	Abl, Act57B, Got2, kay, Gli, Syn, brat, Akt1, simj, Gem3, CASK, Nf1, RtGEF, mGluR, Pdk1, Top3beta, Tip60, hiw, Lrp4, rictor, PICK1, Cul2, Sin1, Synj, Strip, velo, sff, Ada2b, Lrrk, Nrx-1, Nmnat, Smg6, dpr6, wrd, bchs, Pak3, Liprin-alpha, metro, Nlg1, dpr7, DIP-epsilon, par-1, stj, nsl1, AGO1, nonC, CaMKII, Neto, CrebB, Patr-1, unc-104	Biological_pathways	Up-regulated genes only
GO:0007099	centriole replication	21	7	3.07	0.0251	FBgn0002914, FBgn0004889, FBgn0013765, FBgn0020497, FBgn0031575, FBgn0033897, FBgn0263832	Myb, tws, cnn, emb, Cep97, Rcd1, Rcd5	Biological_pathways	Up-regulated genes only
GO:1905268	negative regulation of chromatin organization	21	7	3.07	0.0251	FBgn0005617, FBgn0020412, FBgn0024329, FBgn0037659, FBgn0042085, FBgn0087008, FBgn0260794	msl-1, JIL-1, Mekk1, Kdm2, Bap170, e(y)3, ctrip	Biological_pathways	Up-regulated genes only
GO:0006952	defense response	298	56	43.57	0.02547	FBgn0000541, FBgn0001222, FBgn0001247, FBgn0003134, FBgn0005632, FBgn0010015, FBgn0010385, FBgn0010812, FBgn0011274, FBgn0016977, FBgn0024807, FBgn0025583, FBgn0025827, FBgn0027491, FBgn0028411, FBgn0029765, FBgn0030320, FBgn0031187, FBgn0031216, FBgn0031317, FBgn0031973, FBgn0032256, FBgn0033980, FBgn0034162, FBgn0034246, FBgn0034366, FBgn0034511, FBgn0035236, FBgn0035434, FBgn0035498, FBgn00361…	E(bx), Hsf, Ide, Pp1alpha-96A, faf, CanA1, Def, unc-45, Dif, spen, DIP1, IM2, CG6421, Cdk5alpha, Nxt1, CG16756, CG2247, Usp2, Zir, Charon, Spn28Dc, RluA-2, Cyp6a20, CG6426, Dcr-2, Atg7, GNBP-like3, CG12004, Drsl5, Fit1, FoxK, CG7408, Als2, Nup98-96, Diedel, POSH, GNBP3, IM4, Tep4, Tep2, HBS1, PGRP-SB1, CG6429, DPCoAC, IM14, CG34215, AGO2, dl, pic, Exn, Gprk2, Ect4, Dark, coro, sima, Sec5	Biological_pathways	Up-regulated genes only
GO:0019222	regulation of metabolic process	1616	290	236.29	0.02549	FBgn0000283, FBgn0000286, FBgn0000289, FBgn0000395, FBgn0000541, FBgn0000568, FBgn0001075, FBgn0001222, FBgn0001247, FBgn0001297, FBgn0001308, FBgn0001978, FBgn0001994, FBgn0002023, FBgn0002044, FBgn0002121, FBgn0002183, FBgn0002525, FBgn0002914, FBgn0003068, FBgn0003334, FBgn0003415, FBgn0003430, FBgn0003459, FBgn0003862, FBgn0004362, FBgn0004656, FBgn0005617, FBgn0005632, FBgn0005655, FBgn00056…	Cp190, Cf2, cg, cv-2, E(bx), Eip75B, ft, Hsf, Ide, kay, Khc, stc, crp, Lim3, swm, l(2)gl, dre4, Lam, Myb, per, Scm, skd, slp1, stwl, trx, HmgD, fs(1)h, msl-1, faf, PCNA, spi, Dbp45A, Ssrp, brat, Akt1, simj, bol, heph, Dif, l(2)efl, Ssdp, Iswi, Fdx1, klu, alien, MAPk-Ak2, Hel25E, Hr38, spel1, Apc, Dref, Lis-1, Rbf, smg, vri, PTP-ER, Pdp1, spen, snRNP-U1-70K, smid, Rca1, Smg5, Gcn2, crol, Gcn5, JIL…	Biological_pathways	Up-regulated genes only
GO:0031503	protein-containing complex localization	61	15	8.92	0.02672	FBgn0001308, FBgn0002525, FBgn0003321, FBgn0014189, FBgn0020497, FBgn0023542, FBgn0026207, FBgn0028411, FBgn0035317, FBgn0037382, FBgn0038358, FBgn0039004, FBgn0260933, FBgn0263232, FBgn0263289	Khc, Lam, sbr, Hel25E, emb, Nmd3, mbo, Nxt1, Oseg2, Hpr1, Ttc26, Nup133, rempA, Nxf3, scrib	Biological_pathways	Up-regulated genes only
GO:0044265	cellular macromolecule catabolic process	360	66	52.64	0.02683	FBgn0001247, FBgn0003943, FBgn0005632, FBgn0010300, FBgn0011206, FBgn0013770, FBgn0016070, FBgn0017551, FBgn0019890, FBgn0021814, FBgn0025720, FBgn0026176, FBgn0027508, FBgn0028471, FBgn0028476, FBgn0028978, FBgn0029006, FBgn0029133, FBgn0029891, FBgn0029996, FBgn0030320, FBgn0030521, FBgn0030793, FBgn0030809, FBgn0031187, FBgn0031528, FBgn0032208, FBgn0032956, FBgn0033669, FBgn0034229, FBgn00342…	Ide, Ubi-p63E, faf, brat, bol, Cp1, smg, Rca1, Smg5, Vps28, Ate1, SkpB, Tnks, Nab2, Usp1, trbl, Smurf, REG, Pink1, UbcE2H, CG2247, CtsB1, CG9125, Ubr1, Usp2, CG15412, Ufd4, Cul2, PI31, CG4847, Dcr-2, CG11044, CG9945, CG11275, CG5087, CG11658, Pop2, CG9705, Edc3, Lon, Tailor, Kdm2, Usp8, Dcr-1, Smg6, Sid, POSH, CG31633, Trim9, Ndfip, snama, ALiX, Clbn, Not10, Diap1, ctrip, pic, Cul3, cu, Ltn1, mbf…	Biological_pathways	Up-regulated genes only
GO:0045944	positive regulation of transcription by RNA polymerase II	245	47	35.82	0.02769	FBgn0000286, FBgn0000568, FBgn0001222, FBgn0001297, FBgn0002023, FBgn0002183, FBgn0002914, FBgn0003862, FBgn0004656, FBgn0011274, FBgn0011604, FBgn0014859, FBgn0020496, FBgn0022724, FBgn0026080, FBgn0026401, FBgn0027553, FBgn0028387, FBgn0033052, FBgn0033897, FBgn0034240, FBgn0034975, FBgn0035153, FBgn0035205, FBgn0035213, FBgn0037248, FBgn0037255, FBgn0037672, FBgn0038016, FBgn0039066, FBgn00391…	Cf2, Eip75B, Hsf, kay, Lim3, dre4, Myb, trx, fs(1)h, Dif, Iswi, Hr38, CtBP, Taf8, Tip60, Nipped-B, NELF-B, chm, SCAP, Rcd1, MESR4, enok, ebd1, Ctr9, CG2199, srl, Fip1, sage, MBD-R2, EloA, Nup98-96, CG13609, CG12071, Spt5, Dlip3, Setd3, CG32767, Nup153, e(y)3, dl, mbf1, Lpin, Lpt, Rcd5, CrebB, ocm, sima	Biological_pathways	Up-regulated genes only
GO:0072384	organelle transport along microtubule	26	8	3.8	0.0277	FBgn0001308, FBgn0015754, FBgn0019968, FBgn0029870, FBgn0029891, FBgn0034447, FBgn0046704, FBgn0267002	Khc, Lis-1, Khc-73, Marf, Pink1, CG7744, Liprin-alpha, unc-104	Biological_pathways	Up-regulated genes only
GO:0048135	female germ-line cyst formation	17	6	2.49	0.02827	FBgn0013746, FBgn0015754, FBgn0030520, FBgn0039016, FBgn0262527, FBgn0262739	alien, Lis-1, Pdcd4, Dcr-1, nsl1, AGO1	Biological_pathways	Up-regulated genes only
GO:0032388	positive regulation of intracellular transport	17	6	2.49	0.02827	FBgn0000017, FBgn0002044, FBgn0003321, FBgn0010660, FBgn0021761, FBgn0039302	Abl, swm, sbr, Nup214, Nup154, Nup358	Biological_pathways	Up-regulated genes only
GO:0034605	cellular response to heat	31	9	4.53	0.0291	FBgn0001222, FBgn0001230, FBgn0010812, FBgn0013278, FBgn0024329, FBgn0028396, FBgn0037382, FBgn0039120, FBgn0044812	Hsf, Hsp68, unc-45, Hsp70Ba, Mekk1, TotA, Hpr1, Nup98-96, TotC	Biological_pathways	Up-regulated genes only
GO:0006333	chromatin assembly or disassembly	41	11	6	0.02966	FBgn0002183, FBgn0002781, FBgn0010278, FBgn0011604, FBgn0014857, FBgn0024329, FBgn0025463, FBgn0026427, FBgn0031820, FBgn0034975, FBgn0039338	dre4, mod(mdg4), Ssrp, Iswi, His3.3B, Mekk1, Bap60, Su(var)2-HP2, Daxx, enok, XNP	Biological_pathways	Up-regulated genes only
GO:0062012	regulation of small molecule metabolic process	36	10	5.26	0.02967	FBgn0000568, FBgn0011769, FBgn0025741, FBgn0029891, FBgn0031263, FBgn0034950, FBgn0037248, FBgn0038074, FBgn0263593, FBgn0266064	Eip75B, Fdx1, PlexA, Pink1, Tspo, Pask, srl, Gnmt, Lpin, GlyS	Biological_pathways	Up-regulated genes only
GO:0045793	positive regulation of cell size	36	10	5.26	0.02967	FBgn0010379, FBgn0013987, FBgn0019990, FBgn0020386, FBgn0024248, FBgn0024329, FBgn0026401, FBgn0028978, FBgn0031006, FBgn0264691	Akt1, MAPk-Ak2, Gcn2, Pdk1, chico, Mekk1, Nipped-B, trbl, rictor, Lst8	Biological_pathways	Up-regulated genes only
GO:0046483	heterocycle metabolic process	1930	346	282.21	0.03052	FBgn0000052, FBgn0000053, FBgn0000153, FBgn0000246, FBgn0000283, FBgn0000286, FBgn0000289, FBgn0000395, FBgn0000541, FBgn0000568, FBgn0001186, FBgn0001187, FBgn0001222, FBgn0001297, FBgn0001308, FBgn0001330, FBgn0001978, FBgn0001994, FBgn0002023, FBgn0002044, FBgn0002183, FBgn0002525, FBgn0002641, FBgn0002887, FBgn0002891, FBgn0002914, FBgn0003068, FBgn0003082, FBgn0003189, FBgn0003277, FBgn00033…	Pfas, Gart, b, c(3)G, Cp190, Cf2, cg, cv-2, E(bx), Eip75B, Hex-A, Hex-C, Hsf, kay, Khc, kz, stc, crp, Lim3, swm, dre4, Lam, mal, mus201, mus205, Myb, per, phr, r, RpII215, Scm, skd, slp1, stwl, st, trx, HmgD, RpIII128, fs(1)h, Xpc, Gnf1, msl-1, PCNA, RpA-70, Dbp45A, Nmdmc, brat, simj, Ref1, TrpRS, l(3)07882, bol, heph, Dif, Ssdp, Iswi, La, DNApol-alpha50, Irbp, Gem3, klu, alien, Hel25E, Hr38, spe…	Biological_pathways	Up-regulated genes only
GO:0009047	dosage compensation by hyperactivation of X chromosome	13	5	1.9	0.03078	FBgn0005617, FBgn0034246, FBgn0037926, FBgn0087035, FBgn0263352	msl-1, Dcr-2, Elp1, AGO2, Unr	Biological_pathways	Up-regulated genes only
GO:0007528	neuromuscular junction development	158	32	23.1	0.03175	FBgn0000017, FBgn0000044, FBgn0001297, FBgn0004575, FBgn0010300, FBgn0010379, FBgn0010762, FBgn0011802, FBgn0013759, FBgn0015269, FBgn0019985, FBgn0020386, FBgn0030600, FBgn0031006, FBgn0032956, FBgn0033935, FBgn0035437, FBgn0036544, FBgn0038816, FBgn0038975, FBgn0042693, FBgn0046704, FBgn0050021, FBgn0051146, FBgn0260934, FBgn0261041, FBgn0262527, FBgn0264607, FBgn0265416, FBgn0265784, FBgn02660…	Abl, Act57B, kay, Syn, brat, Akt1, simj, Gem3, CASK, Nf1, mGluR, Pdk1, hiw, rictor, Cul2, Sin1, Strip, sff, Lrrk, Nrx-1, wrd, Liprin-alpha, metro, Nlg1, par-1, stj, nsl1, CaMKII, Neto, CrebB, Patr-1, unc-104	Biological_pathways	Up-regulated genes only
GO:0009112	nucleobase metabolic process	22	7	3.22	0.0323	FBgn0000052, FBgn0000053, FBgn0000153, FBgn0003189, FBgn0020385, FBgn0029823, FBgn0038349	Pfas, Gart, b, r, pug, Shmt, AOX3	Biological_pathways	Up-regulated genes only
GO:0098534	centriole assembly	22	7	3.22	0.0323	FBgn0002914, FBgn0004889, FBgn0013765, FBgn0020497, FBgn0031575, FBgn0033897, FBgn0263832	Myb, tws, cnn, emb, Cep97, Rcd1, Rcd5	Biological_pathways	Up-regulated genes only
GO:0009069	serine family amino acid metabolic process	22	7	3.22	0.0323	FBgn0014427, FBgn0029823, FBgn0031148, FBgn0034276, FBgn0037684, FBgn0038074, FBgn0263864	CG11899, Shmt, Cbs, Sardh, Srr, Gnmt, Dark	Biological_pathways	Up-regulated genes only
GO:0055114	oxidation-reduction process	401	72	58.63	0.03288	FBgn0000261, FBgn0001112, FBgn0001208, FBgn0001258, FBgn0002036, FBgn0010222, FBgn0013773, FBgn0015714, FBgn0020385, FBgn0020496, FBgn0020653, FBgn0024289, FBgn0025454, FBgn0028940, FBgn0029891, FBgn0030026, FBgn0030087, FBgn0030588, FBgn0030589, FBgn0030593, FBgn0030737, FBgn0030876, FBgn0031359, FBgn0031689, FBgn0031713, FBgn0031813, FBgn0031971, FBgn0031995, FBgn0032149, FBgn0032819, FBgn00329…	Cat, Gld, Hn, Ldh, CG10561, Nmdmc, Cyp6a22, Cyp6a17, pug, CtBP, Trxr-1, Sodh-1, Cyp6g1, Cyp28a5, Pink1, sni, CG7766, CG9521, CG9519, CG9512, Had1, CG6762, Rim2, Cyp28d1, Coq6, CG9527, Sirup, CG8475, CG4036, CG10463, CG8665, CG3270, Cyp6a14, Cyp4p2, Etf-QO, Prx2540-2, CG12338, Cyp6a20, ADPS, Sardh, CG9485, CG17807, Pask, Trh, UGP, CG6083, CG10638, CG7724, Hpd, HIPP1, CG7470, CG7140, ScsbetaA, CG18…	Biological_pathways	Up-regulated genes only
GO:0002376	immune system process	358	65	52.35	0.03351	FBgn0000261, FBgn0000541, FBgn0000568, FBgn0001247, FBgn0001297, FBgn0002525, FBgn0003134, FBgn0003447, FBgn0003459, FBgn0005632, FBgn0005655, FBgn0010015, FBgn0010379, FBgn0010385, FBgn0010812, FBgn0011274, FBgn0016696, FBgn0021895, FBgn0022764, FBgn0024248, FBgn0024329, FBgn0024807, FBgn0024921, FBgn0026207, FBgn0026263, FBgn0027491, FBgn0028411, FBgn0031187, FBgn0031216, FBgn0031317, FBgn00319…	Cat, E(bx), Eip75B, Ide, kay, Lam, Pp1alpha-96A, sn, stwl, faf, PCNA, CanA1, Akt1, Def, unc-45, Dif, Pitslre, ytr, Sin3A, chico, Mekk1, DIP1, Tnpo, mbo, bip1, Cdk5alpha, Nxt1, Usp2, Zir, Charon, Spn28Dc, CG4036, RluA-2, Dcr-2, Atg7, Swim, asrij, FoxK, mop, Mkp3, Als2, CG9636, Nup98-96, Diedel, POSH, GNBP3, Dlip3, IM4, Tep4, Tep2, HBS1, PGRP-SB1, DPCoAC, CG34215, AGO2, dl, mxc, par-1, Exn, Gprk2, …	Biological_pathways	Up-regulated genes only
GO:0033044	regulation of chromosome organization	120	31	17.55	0.03357	FBgn0000283, FBgn0002183, FBgn0002781, FBgn0004889, FBgn0005617, FBgn0010278, FBgn0015799, FBgn0019890, FBgn0020309, FBgn0020412, FBgn0024291, FBgn0024329, FBgn0025463, FBgn0026401, FBgn0027499, FBgn0027508, FBgn0030891, FBgn0033692, FBgn0035205, FBgn0036004, FBgn0036398, FBgn0037555, FBgn0037659, FBgn0039260, FBgn0042085, FBgn0052685, FBgn0087008, FBgn0260794, FBgn0262519, FBgn0263667, FBgn02656…	Cp190, dre4, mod(mdg4), tws, msl-1, Ssrp, Rbf, Smg5, crol, JIL-1, Sirt1, Mekk1, Bap60, Nipped-B, wde, Tnks, Ada3, wash, Ctr9, Jarid2, upSET, Ada2b, Kdm2, Smg6, Bap170, ZAP3, e(y)3, ctrip, Mi-2, Lpt, Su(z)2	Biological_pathways	Up-regulated genes only
GO:0070925	organelle assembly	242	46	35.39	0.03367	FBgn0002525, FBgn0002914, FBgn0003149, FBgn0004117, FBgn0004169, FBgn0004380, FBgn0004889, FBgn0011296, FBgn0011604, FBgn0013765, FBgn0015754, FBgn0020497, FBgn0021761, FBgn0026370, FBgn0026431, FBgn0028473, FBgn0030004, FBgn0031006, FBgn0031298, FBgn0031575, FBgn0032935, FBgn0033224, FBgn0033557, FBgn0033661, FBgn0033685, FBgn0033897, FBgn0033935, FBgn0034366, FBgn0034691, FBgn0035317, FBgn00357…	Lam, Myb, Prm, Tm2, up, Klp64D, tws, l(2)efl, Iswi, cnn, Lis-1, emb, Nup154, SRPK, Grip75, Non1, CG10958, rictor, Atg4a, Cep97, Atg18b, Nop17l, CG12325, CG13185, OSCP1, Rcd1, Sin1, Atg7, Synj, Oseg2, CG8549, CG14105, mop, Edc3, Aduk, Ttc26, EndoA, Lrrk, CG33158, Mlp60A, rhea, rempA, Atg13, grp, Rcd5, Patr-1	Biological_pathways	Up-regulated genes only
GO:0009156	ribonucleoside monophosphate biosynthetic process	47	12	6.87	0.03424	FBgn0000052, FBgn0000053, FBgn0001186, FBgn0001187, FBgn0020513, FBgn0022338, FBgn0036030, FBgn0036337, FBgn0038467, FBgn0038957, FBgn0039241, FBgn0052626	Pfas, Gart, Hex-A, Hex-C, Paics, dnk, CG6767, AdenoK, AdSL, CG7059, CG11089, AMPdeam	Biological_pathways	Up-regulated genes only
GO:0051223	regulation of protein transport	47	12	6.87	0.03424	FBgn0000017, FBgn0010660, FBgn0015589, FBgn0020497, FBgn0021761, FBgn0024921, FBgn0026207, FBgn0036448, FBgn0259824, FBgn0264493, FBgn0264607, FBgn0267002	Abl, Nup214, Apc, emb, Nup154, Tnpo, mbo, mop, Hip14, rdx, CaMKII, unc-104	Biological_pathways	Up-regulated genes only
GO:0098722	asymmetric stem cell division	47	12	6.87	0.03424	FBgn0002121, FBgn0004889, FBgn0010300, FBgn0013765, FBgn0024248, FBgn0024555, FBgn0026369, FBgn0027509, FBgn0027948, FBgn0086346, FBgn0261983, FBgn0266418	l(2)gl, tws, brat, cnn, chico, flfl, Sara, TBCD, msps, ALiX, l(2)gd1, wake	Biological_pathways	Up-regulated genes only
GO:1903320	regulation of protein modification by small protein conjugation or removal	27	8	3.95	0.03448	FBgn0017551, FBgn0027568, FBgn0036967, FBgn0037659, FBgn0043362, FBgn0052177, FBgn0260635, FBgn0260794	Rca1, Cand1, SCCRO4, Kdm2, bchs, Ndfip, Diap1, ctrip	Biological_pathways	Up-regulated genes only
GO:0044270	cellular nitrogen compound catabolic process	136	28	19.89	0.03521	FBgn0000153, FBgn0001186, FBgn0001187, FBgn0011206, FBgn0016070, FBgn0019890, FBgn0028471, FBgn0030793, FBgn0032945, FBgn0033538, FBgn0034246, FBgn0036239, FBgn0036661, FBgn0036735, FBgn0037470, FBgn0038172, FBgn0038349, FBgn0038957, FBgn0039016, FBgn0039260, FBgn0039593, FBgn0050104, FBgn0260444, FBgn0261808, FBgn0262732, FBgn0262739, FBgn0263968, FBgn0266053	b, Hex-A, Hex-C, bol, smg, Smg5, Nab2, CG9125, CG8665, CG11883, Dcr-2, Pop2, CG9705, Edc3, Tailor, Adgf-D, AOX3, CG7059, Dcr-1, Smg6, Sid, NT5E-2, Not10, cu, mbf1, AGO1, nonC, Patr-1	Biological_pathways	Up-regulated genes only
GO:0006281	DNA repair	132	40	19.3	0.0353	FBgn0002887, FBgn0002891, FBgn0003082, FBgn0004698, FBgn0004913, FBgn0005655, FBgn0010173, FBgn0011774, FBgn0015546, FBgn0020270, FBgn0024555, FBgn0024912, FBgn0026401, FBgn0026533, FBgn0026751, FBgn0028360, FBgn0028476, FBgn0029825, FBgn0030506, FBgn0032906, FBgn0034728, FBgn0035996, FBgn0036126, FBgn0037141, FBgn0037301, FBgn0037554, FBgn0037897, FBgn0038344, FBgn0041627, FBgn0052438, FBgn00535…	mus201, mus205, phr, Xpc, Gnf1, PCNA, RpA-70, Irbp, spel1, mre11, flfl, agt, Nipped-B, Dek, XRCC1, Cdc7, Usp1, CG12728, DNAlig4, RPA2, rad50, CG3448, Irbp18, DNApol-eta, Mms19, DNApol-iota, CG5270, obe, Ku80, SMC5, Nipped-A, Ino80, gkt, pic, Xrp1, nbs, DNApol-delta, koi, jnj, RPA3	Biological_pathways	Up-regulated genes only
GO:0009116	nucleoside metabolic process	37	10	5.41	0.03551	FBgn0002641, FBgn0003189, FBgn0022029, FBgn0034276, FBgn0035436, FBgn0036030, FBgn0036337, FBgn0038074, FBgn0038172, FBgn0263864	mal, r, l(2)k01209, Sardh, CG12016, CG6767, AdenoK, Gnmt, Adgf-D, Dark	Biological_pathways	Up-regulated genes only
GO:0009991	response to extracellular stimulus	131	27	19.15	0.03766	FBgn0000721, FBgn0001230, FBgn0001247, FBgn0003459, FBgn0015799, FBgn0024248, FBgn0031006, FBgn0033528, FBgn0033926, FBgn0034140, FBgn0034366, FBgn0034897, FBgn0035538, FBgn0038074, FBgn0038659, FBgn0038816, FBgn0039016, FBgn0039209, FBgn0044047, FBgn0261862, FBgn0263593, FBgn0263864, FBgn0264357, FBgn0264607, FBgn0266019, FBgn0266064, FBgn0266717	for, Hsp68, Ide, stwl, Rbf, chico, rictor, trsn, Arc1, Lst, Atg7, Sesn, DopEcR, Gnmt, EndoA, Lrrk, Dcr-1, REPTOR, Ilp6, whd, Lpin, Dark, SNF4Agamma, CaMKII, rudhira, GlyS, Bruce	Biological_pathways	Up-regulated genes only
GO:0010941	regulation of cell death	214	41	31.29	0.03857	FBgn0001075, FBgn0001977, FBgn0002121, FBgn0004797, FBgn0005672, FBgn0010379, FBgn0013469, FBgn0014073, FBgn0015589, FBgn0015664, FBgn0015799, FBgn0020386, FBgn0021761, FBgn0024291, FBgn0024913, FBgn0026080, FBgn0029891, FBgn0031263, FBgn0031683, FBgn0031820, FBgn0034366, FBgn0035713, FBgn0037643, FBgn0038816, FBgn0040294, FBgn0042693, FBgn0051216, FBgn0052176, FBgn0085451, FBgn0087011, FBgn02591…	ft, CIAPIN1, l(2)gl, mdy, spi, Akt1, klu, Tie, Apc, Dref, Rbf, Pdk1, Nup154, Sirt1, Actbeta, Tip60, Pink1, Tspo, CG4230, Daxx, Atg7, velo, ScsbetaA, Lrrk, POSH, wrd, Naam, CG32176, htk, CG41520, Clbn, Diap1, Tango9, Atg13, Cul3, Opa1, Ect4, Dark, rdx, tau, Bruce	Biological_pathways	Up-regulated genes only
GO:0019439	aromatic compound catabolic process	142	32	20.76	0.03946	FBgn0001186, FBgn0001187, FBgn0001208, FBgn0011206, FBgn0016013, FBgn0016070, FBgn0019890, FBgn0028471, FBgn0030793, FBgn0032945, FBgn0033538, FBgn0034246, FBgn0036239, FBgn0036661, FBgn0036735, FBgn0036992, FBgn0037470, FBgn0037697, FBgn0038172, FBgn0038349, FBgn0038957, FBgn0039016, FBgn0039260, FBgn0039593, FBgn0040211, FBgn0050104, FBgn0260444, FBgn0261808, FBgn0262732, FBgn0262739, FBgn02639…	Hex-A, Hex-C, Hn, bol, Faa, smg, Smg5, Nab2, CG9125, CG8665, CG11883, Dcr-2, Pop2, CG9705, Edc3, Hpd, Tailor, GstZ2, Adgf-D, AOX3, CG7059, Dcr-1, Smg6, Sid, hgo, NT5E-2, Not10, cu, mbf1, AGO1, nonC, Patr-1	Biological_pathways	Up-regulated genes only
GO:0009124	nucleoside monophosphate biosynthetic process	48	12	7.02	0.03981	FBgn0000052, FBgn0000053, FBgn0001186, FBgn0001187, FBgn0020513, FBgn0022338, FBgn0036030, FBgn0036337, FBgn0038467, FBgn0038957, FBgn0039241, FBgn0052626	Pfas, Gart, Hex-A, Hex-C, Paics, dnk, CG6767, AdenoK, AdSL, CG7059, CG11089, AMPdeam	Biological_pathways	Up-regulated genes only
GO:0006611	protein export from nucleus	48	12	7.02	0.03981	FBgn0000017, FBgn0003321, FBgn0010660, FBgn0014189, FBgn0020497, FBgn0023542, FBgn0026207, FBgn0028411, FBgn0037382, FBgn0039004, FBgn0259152, FBgn0263232	Abl, sbr, Nup214, Hel25E, emb, Nmd3, mbo, Nxt1, Hpr1, Nup133, Clbn, Nxf3	Biological_pathways	Up-regulated genes only
GO:0009620	response to fungus	48	12	7.02	0.03981	FBgn0001222, FBgn0011274, FBgn0015222, FBgn0016977, FBgn0031317, FBgn0034511, FBgn0035236, FBgn0035434, FBgn0040321, FBgn0041180, FBgn0260962, FBgn0265935	Hsf, Dif, Fer1HCH, spen, Charon, GNBP-like3, CG12004, Drsl5, GNBP3, Tep4, pic, coro	Biological_pathways	Up-regulated genes only
GO:0072525	pyridine-containing compound biosynthetic process	23	7	3.36	0.04076	FBgn0001186, FBgn0001187, FBgn0031589, FBgn0035436, FBgn0038957, FBgn0039254, FBgn0085484	Hex-A, Hex-C, Naprt, CG12016, CG7059, Nmnat, Pdxk	Biological_pathways	Up-regulated genes only
GO:0043648	dicarboxylic acid metabolic process	23	7	3.36	0.04076	FBgn0001124, FBgn0001125, FBgn0010222, FBgn0020385, FBgn0029823, FBgn0032945, FBgn0261625	Got1, Got2, Nmdmc, pug, Shmt, CG8665, GLS	Biological_pathways	Up-regulated genes only
GO:0031396	regulation of protein ubiquitination	23	7	3.36	0.04076	FBgn0017551, FBgn0036967, FBgn0037659, FBgn0043362, FBgn0052177, FBgn0260635, FBgn0260794	Rca1, SCCRO4, Kdm2, bchs, Ndfip, Diap1, ctrip	Biological_pathways	Up-regulated genes only
GO:0070828	heterochromatin organization	43	11	6.29	0.04112	FBgn0001308, FBgn0002525, FBgn0003459, FBgn0020309, FBgn0024329, FBgn0025463, FBgn0026427, FBgn0034246, FBgn0036398, FBgn0039338, FBgn0087035	Khc, Lam, stwl, crol, Mekk1, Bap60, Su(var)2-HP2, Dcr-2, upSET, XNP, AGO2	Biological_pathways	Up-regulated genes only
GO:0042737	drug catabolic process	43	11	6.29	0.04112	FBgn0000153, FBgn0000261, FBgn0001208, FBgn0002036, FBgn0016013, FBgn0033518, FBgn0037697, FBgn0038074, FBgn0038172, FBgn0040211, FBgn0050104	b, Cat, Hn, CG10561, Faa, Prx2540-2, GstZ2, Gnmt, Adgf-D, hgo, NT5E-2	Biological_pathways	Up-regulated genes only
GO:0046700	heterocycle catabolic process	138	28	20.18	0.04163	FBgn0000153, FBgn0001186, FBgn0001187, FBgn0011206, FBgn0016070, FBgn0019890, FBgn0028471, FBgn0030793, FBgn0032945, FBgn0033538, FBgn0034246, FBgn0036239, FBgn0036661, FBgn0036735, FBgn0037470, FBgn0038172, FBgn0038349, FBgn0038957, FBgn0039016, FBgn0039260, FBgn0039593, FBgn0050104, FBgn0260444, FBgn0261808, FBgn0262732, FBgn0262739, FBgn0263968, FBgn0266053	b, Hex-A, Hex-C, bol, smg, Smg5, Nab2, CG9125, CG8665, CG11883, Dcr-2, Pop2, CG9705, Edc3, Tailor, Adgf-D, AOX3, CG7059, Dcr-1, Smg6, Sid, NT5E-2, Not10, cu, mbf1, AGO1, nonC, Patr-1	Biological_pathways	Up-regulated genes only
GO:0071375	cellular response to peptide hormone stimulus	59	14	8.63	0.04186	FBgn0010379, FBgn0014859, FBgn0020386, FBgn0024248, FBgn0024291, FBgn0028978, FBgn0031006, FBgn0033935, FBgn0037248, FBgn0042693, FBgn0044047, FBgn0263593, FBgn0264691, FBgn0266411	Akt1, Hr38, Pdk1, chico, Sirt1, trbl, rictor, Sin1, srl, wrd, Ilp6, Lpin, Lst8, sima	Biological_pathways	Up-regulated genes only
GO:1901653	cellular response to peptide	59	14	8.63	0.04186	FBgn0010379, FBgn0014859, FBgn0020386, FBgn0024248, FBgn0024291, FBgn0028978, FBgn0031006, FBgn0033935, FBgn0037248, FBgn0042693, FBgn0044047, FBgn0263593, FBgn0264691, FBgn0266411	Akt1, Hr38, Pdk1, chico, Sirt1, trbl, rictor, Sin1, srl, wrd, Ilp6, Lpin, Lst8, sima	Biological_pathways	Up-regulated genes only
GO:0042594	response to starvation	115	24	16.82	0.04224	FBgn0001230, FBgn0015799, FBgn0024248, FBgn0031006, FBgn0033528, FBgn0033926, FBgn0034140, FBgn0034366, FBgn0034897, FBgn0035538, FBgn0038074, FBgn0038659, FBgn0038816, FBgn0039016, FBgn0039209, FBgn0044047, FBgn0261862, FBgn0263593, FBgn0263864, FBgn0264357, FBgn0264607, FBgn0266019, FBgn0266064, FBgn0266717	Hsp68, Rbf, chico, rictor, trsn, Arc1, Lst, Atg7, Sesn, DopEcR, Gnmt, EndoA, Lrrk, Dcr-1, REPTOR, Ilp6, whd, Lpin, Dark, SNF4Agamma, CaMKII, rudhira, GlyS, Bruce	Biological_pathways	Up-regulated genes only
GO:0046503	glycerolipid catabolic process	14	5	2.05	0.04227	FBgn0010379, FBgn0024248, FBgn0030607, FBgn0031566, FBgn0036449	Akt1, chico, dob, CG2818, bmm	Biological_pathways	Up-regulated genes only
GO:0006555	methionine metabolic process	14	5	2.05	0.04227	FBgn0032726, FBgn0032727, FBgn0034276, FBgn0038074, FBgn0263864	CG10621, CG10623, Sardh, Gnmt, Dark	Biological_pathways	Up-regulated genes only
GO:0051896	regulation of protein kinase B signaling	14	5	2.05	0.04227	FBgn0020386, FBgn0028978, FBgn0031006, FBgn0033935, FBgn0264691	Pdk1, trbl, rictor, Sin1, Lst8	Biological_pathways	Up-regulated genes only
GO:0034502	protein localization to chromosome	14	5	2.05	0.04227	FBgn0015754, FBgn0015799, FBgn0026401, FBgn0027508, FBgn0262519	Lis-1, Rbf, Nipped-B, Tnks, Mi-2	Biological_pathways	Up-regulated genes only
GO:0051298	centrosome duplication	28	8	4.09	0.04229	FBgn0002914, FBgn0004889, FBgn0013765, FBgn0020497, FBgn0027948, FBgn0031575, FBgn0033897, FBgn0263832	Myb, tws, cnn, emb, msps, Cep97, Rcd1, Rcd5	Biological_pathways	Up-regulated genes only
GO:0000045	autophagosome assembly	28	8	4.09	0.04229	FBgn0031298, FBgn0032935, FBgn0034366, FBgn0034691, FBgn0037679, FBgn0038659, FBgn0038816, FBgn0261108	Atg4a, Atg18b, Atg7, Synj, Aduk, EndoA, Lrrk, Atg13	Biological_pathways	Up-regulated genes only
GO:0010639	negative regulation of organelle organization	70	16	10.24	0.04249	FBgn0005617, FBgn0015589, FBgn0017551, FBgn0020412, FBgn0024329, FBgn0026620, FBgn0027509, FBgn0028978, FBgn0029891, FBgn0031575, FBgn0037659, FBgn0042085, FBgn0087008, FBgn0260744, FBgn0260794, FBgn0262519	msl-1, Apc, Rca1, JIL-1, Mekk1, tacc, TBCD, trbl, Pink1, Cep97, Kdm2, Bap170, e(y)3, Tango9, ctrip, Mi-2	Biological_pathways	Up-regulated genes only
GO:0051246	regulation of protein metabolic process	463	81	67.7	0.0429	FBgn0001297, FBgn0002121, FBgn0003068, FBgn0005632, FBgn0005672, FBgn0010278, FBgn0010300, FBgn0011206, FBgn0011224, FBgn0011296, FBgn0013987, FBgn0015589, FBgn0015754, FBgn0016070, FBgn0016641, FBgn0017551, FBgn0019990, FBgn0023388, FBgn0024291, FBgn0024293, FBgn0024329, FBgn0024913, FBgn0027508, FBgn0027568, FBgn0028343, FBgn0028978, FBgn0028983, FBgn0029006, FBgn0029133, FBgn0030336, FBgn00306…	kay, l(2)gl, per, faf, spi, Ssrp, brat, bol, heph, l(2)efl, MAPk-Ak2, Apc, Lis-1, smg, PTP-ER, Rca1, Gcn2, Dap160, Sirt1, Spn43Ab, Mekk1, Actbeta, Tnks, Cand1, Ankle2, trbl, Spn55B, Smurf, REG, CG1578, RpIIIC160, Ada3, rictor, Usp2, Spn28Dc, Gadd45, Spn47C, PI31, Sin1, CG8060, CG11275, Ctr9, DopEcR, Jarid2, Pop2, upSET, Mkp3, Lon, SCCRO4, PEK, Ada2b, ScsbetaA, Kdm2, Paip2, XNP, POSH, wrd, bchs, C…	Biological_pathways	Up-regulated genes only
GO:0034655	nucleobase-containing compound catabolic process	121	25	17.69	0.04313	FBgn0001186, FBgn0001187, FBgn0011206, FBgn0016070, FBgn0019890, FBgn0028471, FBgn0030793, FBgn0033538, FBgn0034246, FBgn0036239, FBgn0036661, FBgn0036735, FBgn0037470, FBgn0038172, FBgn0038957, FBgn0039016, FBgn0039260, FBgn0039593, FBgn0050104, FBgn0260444, FBgn0261808, FBgn0262732, FBgn0262739, FBgn0263968, FBgn0266053	Hex-A, Hex-C, bol, smg, Smg5, Nab2, CG9125, CG11883, Dcr-2, Pop2, CG9705, Edc3, Tailor, Adgf-D, CG7059, Dcr-1, Smg6, Sid, NT5E-2, Not10, cu, mbf1, AGO1, nonC, Patr-1	Biological_pathways	Up-regulated genes only
GO:0000226	microtubule cytoskeleton organization	216	41	31.58	0.04395	FBgn0001075, FBgn0001308, FBgn0002121, FBgn0002525, FBgn0002645, FBgn0002914, FBgn0004380, FBgn0004381, FBgn0004889, FBgn0005655, FBgn0011224, FBgn0013765, FBgn0015589, FBgn0015754, FBgn0019968, FBgn0020497, FBgn0021761, FBgn0026370, FBgn0026431, FBgn0026620, FBgn0027509, FBgn0027948, FBgn0028473, FBgn0030004, FBgn0031374, FBgn0031575, FBgn0033224, FBgn0033692, FBgn0033897, FBgn0035437, FBgn00363…	ft, Khc, l(2)gl, Lam, Map205, Myb, Klp64D, Klp68D, tws, PCNA, heph, cnn, Apc, Lis-1, Khc-73, emb, Nup154, SRPK, Grip75, tacc, TBCD, msps, Non1, CG10958, Wdr62, Cep97, Nop17l, wash, Rcd1, Strip, ssp2, mop, Lrrk, bchs, Plp, par-1, grp, Msp300, Rcd5, wake, tau	Biological_pathways	Up-regulated genes only
GO:0016482	cytosolic transport	54	13	7.9	0.04395	FBgn0000017, FBgn0001308, FBgn0015754, FBgn0021761, FBgn0031598, FBgn0033692, FBgn0034271, FBgn0034400, FBgn0036448, FBgn0037084, FBgn0038672, FBgn0038816, FBgn0261836	Abl, Khc, Lis-1, Nup154, Vps53, wash, Vps50, CG15099, mop, Syx6, CG6005, Lrrk, Msp300	Biological_pathways	Up-regulated genes only
GO:0016573	histone acetylation	76	17	11.11	0.04488	FBgn0000046, FBgn0000581, FBgn0003862, FBgn0005617, FBgn0020388, FBgn0024291, FBgn0026080, FBgn0027490, FBgn0028387, FBgn0030891, FBgn0031759, FBgn0034975, FBgn0036398, FBgn0036483, FBgn0037555, FBgn0039904, FBgn0053554	Act87E, E(Pc), trx, msl-1, Gcn5, Sirt1, Tip60, D12, chm, Ada3, lid, enok, upSET, CG12316, Ada2b, Hcf, Nipped-A	Biological_pathways	Up-regulated genes only
GO:0098586	cellular response to virus	10	4	1.46	0.0459	FBgn0024807, FBgn0034246, FBgn0036134, FBgn0087035	DIP1, Dcr-2, FoxK, AGO2	Biological_pathways	Up-regulated genes only
GO:0047496	vesicle transport along microtubule	10	4	1.46	0.0459	FBgn0015754, FBgn0019968, FBgn0046704, FBgn0267002	Lis-1, Khc-73, Liprin-alpha, unc-104	Biological_pathways	Up-regulated genes only
GO:0009068	aspartate family amino acid catabolic process	10	4	1.46	0.0459	FBgn0001125, FBgn0025720, FBgn0030653, FBgn0037684	Got2, Ate1, CG7860, Srr	Biological_pathways	Up-regulated genes only
GO:0000726	non-recombinational repair	10	4	1.46	0.0459	FBgn0011774, FBgn0020270, FBgn0030506, FBgn0041627	Irbp, mre11, DNAlig4, Ku80	Biological_pathways	Up-regulated genes only
GO:0042766	nucleosome mobilization	10	4	1.46	0.0459	FBgn0000541, FBgn0011604, FBgn0086613, FBgn0262519	E(bx), Iswi, Ino80, Mi-2	Biological_pathways	Up-regulated genes only
GO:0000731	DNA synthesis involved in DNA repair	10	4	1.46	0.0459	FBgn0002891, FBgn0005655, FBgn0037141, FBgn0037554	mus205, PCNA, DNApol-eta, DNApol-iota	Biological_pathways	Up-regulated genes only
GO:1904748	regulation of apoptotic process involved in development	10	4	1.46	0.0459	FBgn0004797, FBgn0021761, FBgn0261108, FBgn0266717	mdy, Nup154, Atg13, Bruce	Biological_pathways	Up-regulated genes only
GO:0099518	vesicle cytoskeletal trafficking	10	4	1.46	0.0459	FBgn0015754, FBgn0019968, FBgn0046704, FBgn0267002	Lis-1, Khc-73, Liprin-alpha, unc-104	Biological_pathways	Up-regulated genes only
GO:0006298	mismatch repair	10	4	1.46	0.0459	FBgn0004698, FBgn0005655, FBgn0015546, FBgn0266421	Xpc, PCNA, spel1, RPA3	Biological_pathways	Up-regulated genes only
GO:0006366	transcription by RNA polymerase II	560	96	81.88	0.04664	FBgn0000286, FBgn0000395, FBgn0000541, FBgn0000568, FBgn0001222, FBgn0001297, FBgn0001978, FBgn0001994, FBgn0002023, FBgn0002183, FBgn0002914, FBgn0003068, FBgn0003277, FBgn0003415, FBgn0003430, FBgn0003862, FBgn0004362, FBgn0004656, FBgn0010762, FBgn0011274, FBgn0011481, FBgn0011604, FBgn0013469, FBgn0014859, FBgn0015664, FBgn0015754, FBgn0015799, FBgn0016694, FBgn0020309, FBgn0020496, FBgn00227…	Cf2, cv-2, E(bx), Eip75B, Hsf, kay, stc, crp, Lim3, dre4, Myb, per, RpII215, skd, slp1, trx, HmgD, fs(1)h, simj, Dif, Ssdp, Iswi, klu, Hr38, Dref, Lis-1, Rbf, Pdp1, crol, CtBP, Taf8, Hel89B, CREG, Bap60, Tip60, Nipped-B, NELF-B, chm, tio, Smurf, CG3726, hiw, Ada3, Cul2, SCAP, CG18011, Rcd1, MESR4, enok, MED14, ebd1, Ctr9, CG2199, MED4, ERR, CG5830, RAF2, MED1, srl, Fip1, CG14655, Ada2b, sage, Elp…	Biological_pathways	Up-regulated genes only
GO:1901361	organic cyclic compound catabolic process	150	33	21.93	0.04706	FBgn0000153, FBgn0001186, FBgn0001187, FBgn0001208, FBgn0011206, FBgn0016013, FBgn0016070, FBgn0019890, FBgn0028471, FBgn0030793, FBgn0032945, FBgn0033538, FBgn0034246, FBgn0036239, FBgn0036661, FBgn0036735, FBgn0036992, FBgn0037470, FBgn0037697, FBgn0038172, FBgn0038349, FBgn0038957, FBgn0039016, FBgn0039260, FBgn0039593, FBgn0040211, FBgn0050104, FBgn0260444, FBgn0261808, FBgn0262732, FBgn02627…	b, Hex-A, Hex-C, Hn, bol, Faa, smg, Smg5, Nab2, CG9125, CG8665, CG11883, Dcr-2, Pop2, CG9705, Edc3, Hpd, Tailor, GstZ2, Adgf-D, AOX3, CG7059, Dcr-1, Smg6, Sid, hgo, NT5E-2, Not10, cu, mbf1, AGO1, nonC, Patr-1	Biological_pathways	Up-regulated genes only
GO:0060255	regulation of macromolecule metabolic process	1493	269	218.31	0.04752	FBgn0000283, FBgn0000286, FBgn0000289, FBgn0000395, FBgn0000541, FBgn0000568, FBgn0001075, FBgn0001222, FBgn0001297, FBgn0001308, FBgn0001978, FBgn0001994, FBgn0002023, FBgn0002044, FBgn0002121, FBgn0002183, FBgn0002525, FBgn0002914, FBgn0003068, FBgn0003334, FBgn0003415, FBgn0003430, FBgn0003459, FBgn0003862, FBgn0004362, FBgn0004656, FBgn0005617, FBgn0005632, FBgn0005655, FBgn0005672, FBgn00102…	Cp190, Cf2, cg, cv-2, E(bx), Eip75B, ft, Hsf, kay, Khc, stc, crp, Lim3, swm, l(2)gl, dre4, Lam, Myb, per, Scm, skd, slp1, stwl, trx, HmgD, fs(1)h, msl-1, faf, PCNA, spi, Dbp45A, Ssrp, brat, simj, bol, heph, Dif, l(2)efl, Ssdp, Iswi, klu, alien, MAPk-Ak2, Hel25E, Hr38, spel1, Apc, Dref, Lis-1, Rbf, smg, vri, PTP-ER, Pdp1, spen, snRNP-U1-70K, smid, Rca1, Smg5, Gcn2, crol, Gcn5, JIL-1, CtBP, Taf8, S…	Biological_pathways	Up-regulated genes only
GO:0010035	response to inorganic substance	60	14	8.77	0.04755	FBgn0000261, FBgn0010015, FBgn0015222, FBgn0024329, FBgn0025454, FBgn0028396, FBgn0028400, FBgn0030795, FBgn0034381, FBgn0039003, FBgn0039714, FBgn0040319, FBgn0261089, FBgn0261862	Cat, CanA1, Fer1HCH, Mekk1, Cyp6g1, TotA, Syt4, ppk28, List, wfs1, Zip99C, Gclc, Sytalpha, whd	Biological_pathways	Up-regulated genes only
GO:0055088	lipid homeostasis	60	14	8.77	0.04755	FBgn0010379, FBgn0028519, FBgn0030607, FBgn0031813, FBgn0033226, FBgn0034140, FBgn0036053, FBgn0036449, FBgn0037612, FBgn0038074, FBgn0042693, FBgn0263593, FBgn0263864, FBgn0264357	Akt1, hll, dob, CG9527, CG1882, Lst, iPLA2-VIA, bmm, CG8112, Gnmt, wrd, Lpin, Dark, SNF4Agamma	Biological_pathways	Up-regulated genes only
GO:0009743	response to carbohydrate	19	6	2.78	0.048	FBgn0000721, FBgn0032447, FBgn0034140, FBgn0035538, FBgn0085484, FBgn0266064	for, PICK1, Lst, DopEcR, Pdxk, GlyS	Biological_pathways	Up-regulated genes only
GO:0000096	sulfur amino acid metabolic process	19	6	2.78	0.048	FBgn0031148, FBgn0032726, FBgn0032727, FBgn0034276, FBgn0038074, FBgn0263864	Cbs, CG10621, CG10623, Sardh, Gnmt, Dark	Biological_pathways	Up-regulated genes only
GO:0050776	regulation of immune response	134	27	19.59	0.04837	FBgn0000541, FBgn0001247, FBgn0002525, FBgn0003134, FBgn0005632, FBgn0010015, FBgn0010812, FBgn0011274, FBgn0016696, FBgn0024248, FBgn0028411, FBgn0031187, FBgn0031317, FBgn0031973, FBgn0032256, FBgn0034246, FBgn0036448, FBgn0037556, FBgn0040321, FBgn0042712, FBgn0043578, FBgn0067783, FBgn0260632, FBgn0261988, FBgn0262579, FBgn0263864, FBgn0266411	E(bx), Ide, Lam, Pp1alpha-96A, faf, CanA1, unc-45, Dif, Pitslre, chico, Nxt1, Usp2, Charon, Spn28Dc, RluA-2, Dcr-2, mop, CG9636, GNBP3, HBS1, PGRP-SB1, DPCoAC, dl, Gprk2, Ect4, Dark, sima	Biological_pathways	Up-regulated genes only
GO:0009056	catabolic process	781	136	114.2	0.04884	FBgn0000153, FBgn0000261, FBgn0001125, FBgn0001186, FBgn0001187, FBgn0001208, FBgn0001247, FBgn0002036, FBgn0003943, FBgn0005632, FBgn0010300, FBgn0010379, FBgn0011206, FBgn0013770, FBgn0015589, FBgn0016013, FBgn0016070, FBgn0017551, FBgn0019890, FBgn0021814, FBgn0024248, FBgn0024698, FBgn0025454, FBgn0025720, FBgn0026176, FBgn0027508, FBgn0028471, FBgn0028476, FBgn0028497, FBgn0028671, FBgn00289…	b, Cat, Got2, Hex-A, Hex-C, Hn, Ide, CG10561, Ubi-p63E, faf, brat, Akt1, bol, Cp1, Apc, Faa, smg, Rca1, Smg5, Vps28, chico, Cpsf160, Cyp6g1, Ate1, SkpB, Tnks, Nab2, Usp1, CG3530, Vha100-1, trbl, Smurf, REG, Shmt, Pink1, UbcE2H, CG2247, CtsB1, hiw, dob, CG7860, CG9125, Ubr1, Usp2, Atg4a, CG15412, CG2818, CG9527, Ufd4, Atg18b, CG8665, Cul2, Etf-QO, Prx2540-2, CG11883, CG12338, PI31, CG4847, Dcr-2, …	Biological_pathways	Up-regulated genes only
GO:0009057	macromolecule catabolic process	397	70	58.05	0.04936	FBgn0001247, FBgn0003943, FBgn0005632, FBgn0010300, FBgn0011206, FBgn0013770, FBgn0015589, FBgn0016070, FBgn0017551, FBgn0019890, FBgn0021814, FBgn0025720, FBgn0026176, FBgn0027508, FBgn0028471, FBgn0028476, FBgn0028978, FBgn0029006, FBgn0029133, FBgn0029891, FBgn0029996, FBgn0030320, FBgn0030521, FBgn0030793, FBgn0030809, FBgn0031187, FBgn0031528, FBgn0032208, FBgn0032956, FBgn0033669, FBgn00342…	Ide, Ubi-p63E, faf, brat, bol, Cp1, Apc, smg, Rca1, Smg5, Vps28, Ate1, SkpB, Tnks, Nab2, Usp1, trbl, Smurf, REG, Pink1, UbcE2H, CG2247, CtsB1, CG9125, Ubr1, Usp2, CG15412, Ufd4, Cul2, PI31, CG4847, Dcr-2, CG11044, CG9945, CG9485, CG11275, CG5087, CG11658, Pop2, CG9705, Edc3, Lon, Tailor, Kdm2, Usp8, Dcr-1, Smg6, Sid, POSH, PGRP-SB1, CG31633, Trim9, Ndfip, snama, ALiX, Clbn, Not10, Diap1, ctrip, p…	Biological_pathways	Up-regulated genes only
GO:0006732	coenzyme metabolic process	111	23	16.23	0.04944	FBgn0001186, FBgn0001187, FBgn0002641, FBgn0005278, FBgn0010222, FBgn0020385, FBgn0029158, FBgn0029823, FBgn0030460, FBgn0031589, FBgn0031713, FBgn0032945, FBgn0034143, FBgn0034276, FBgn0035436, FBgn0037643, FBgn0038074, FBgn0038957, FBgn0039254, FBgn0085453, FBgn0085484, FBgn0263241, FBgn0263864	Hex-A, Hex-C, mal, Sam-S, Nmdmc, pug, Las, Shmt, Coq5, Naprt, Coq6, CG8665, CG8303, Sardh, CG12016, ScsbetaA, Gnmt, CG7059, Nmnat, Mthfs, Pdxk, Mocs1, Dark	Biological_pathways	Up-regulated genes only
GO:0006325	chromatin organization	314	64	45.91	0.04946	FBgn0000046, FBgn0000283, FBgn0000541, FBgn0000581, FBgn0001308, FBgn0002183, FBgn0002525, FBgn0002781, FBgn0003459, FBgn0003862, FBgn0004362, FBgn0005617, FBgn0010278, FBgn0011604, FBgn0014189, FBgn0014857, FBgn0020309, FBgn0020388, FBgn0020412, FBgn0020496, FBgn0024291, FBgn0024329, FBgn0025463, FBgn0026080, FBgn0026401, FBgn0026427, FBgn0026428, FBgn0027490, FBgn0027499, FBgn0028360, FBgn00283…	Act87E, Cp190, E(bx), E(Pc), Khc, dre4, Lam, mod(mdg4), stwl, trx, HmgD, msl-1, Ssrp, Iswi, Hel25E, His3.3B, crol, Gcn5, JIL-1, CtBP, Sirt1, Mekk1, Bap60, Tip60, Nipped-B, Su(var)2-HP2, HDAC6, D12, wde, Cdc7, chm, Sirt4, Bap111, Ada3, lid, Daxx, CG4751, wash, Dcr-2, Art7, enok, Ctr9, Jarid2, upSET, CG12316, Ada2b, Kdm2, Nup98-96, XNP, Hcf, Bap170, Nipped-A, Nup153, Ino80, Bre1, pea, e(y)3, AGO2, …	Biological_pathways	Up-regulated genes only
GO:0010038	response to metal ion	39	10	5.7	0.0495	FBgn0015222, FBgn0024329, FBgn0025454, FBgn0028396, FBgn0028400, FBgn0034381, FBgn0039714, FBgn0040319, FBgn0261089, FBgn0261862	Fer1HCH, Mekk1, Cyp6g1, TotA, Syt4, List, Zip99C, Gclc, Sytalpha, whd	Biological_pathways	Up-regulated genes only
GO:0031056	regulation of histone modification	39	10	5.7	0.0495	FBgn0024291, FBgn0030891, FBgn0035205, FBgn0036004, FBgn0036398, FBgn0037555, FBgn0037659, FBgn0260794, FBgn0263667, FBgn0265623	Sirt1, Ada3, Ctr9, Jarid2, upSET, Ada2b, Kdm2, ctrip, Lpt, Su(z)2	Biological_pathways	Up-regulated genes only
GO:0000790	nuclear chromatin	136	38	19.12	1.5e-05	FBgn0000541, FBgn0000581, FBgn0002914, FBgn0004362, FBgn0010278, FBgn0010762, FBgn0011604, FBgn0020412, FBgn0020496, FBgn0022764, FBgn0024291, FBgn0025463, FBgn0026080, FBgn0026401, FBgn0026427, FBgn0027503, FBgn0028387, FBgn0030093, FBgn0031759, FBgn0032348, FBgn0032688, FBgn0034728, FBgn0034975, FBgn0036004, FBgn0042085, FBgn0052732, FBgn0061200, FBgn0085451, FBgn0086613, FBgn0086694, FBgn00870…	E(bx), E(Pc), Myb, HmgD, Ssrp, simj, Iswi, JIL-1, CtBP, Sin3A, Sirt1, Bap60, Tip60, Nipped-B, Su(var)2-HP2, CG11970, chm, Bap111, lid, CG4751, CG15160, rad50, enok, Jarid2, Bap170, Setd3, Nup153, htk, Ino80, Bre1, e(y)3, Cap-G, Mi-2, Sap130, Lpt, Rcd5, Su(z)2, CG44774	Cellular_compartment	Up-regulated genes only
GO:0005634	nucleus	2047	358	287.76	0.00044	FBgn0000046, FBgn0000246, FBgn0000283, FBgn0000286, FBgn0000289, FBgn0000541, FBgn0000568, FBgn0000581, FBgn0001222, FBgn0001297, FBgn0001330, FBgn0001978, FBgn0001994, FBgn0002023, FBgn0002044, FBgn0002183, FBgn0002525, FBgn0002638, FBgn0002781, FBgn0002887, FBgn0002891, FBgn0002914, FBgn0003068, FBgn0003134, FBgn0003277, FBgn0003321, FBgn0003334, FBgn0003415, FBgn0003430, FBgn0003447, FBgn00034…	Act87E, c(3)G, Cp190, Cf2, cg, E(bx), Eip75B, E(Pc), Hsf, kay, kz, stc, crp, Lim3, swm, dre4, Lam, Rcc1, mod(mdg4), mus201, mus205, Myb, per, Pp1alpha-96A, RpII215, sbr, Scm, skd, slp1, sn, stwl, trx, Ubi-p63E, HmgD, RpIII128, fs(1)h, Xpc, tws, Eip63F-1, Gnf1, msl-1, wdn, PCNA, RpA-70, Dbp45A, Rbp9, Ssrp, Map60, Akt1, Nup214, simj, sqz, Ref1, l(3)07882, bol, heph, Dif, Ssdp, Iswi, La, DNApol-alph…	Cellular_compartment	Up-regulated genes only
GO:0005700	polytene chromosome	180	42	25.3	0.00048	FBgn0000283, FBgn0000581, FBgn0001222, FBgn0002183, FBgn0002781, FBgn0002914, FBgn0003277, FBgn0003334, FBgn0003459, FBgn0003862, FBgn0011604, FBgn0014189, FBgn0014857, FBgn0015664, FBgn0020388, FBgn0020412, FBgn0020496, FBgn0022764, FBgn0026080, FBgn0026401, FBgn0026427, FBgn0027490, FBgn0029133, FBgn0030891, FBgn0031317, FBgn0036004, FBgn0036398, FBgn0037555, FBgn0037672, FBgn0038016, FBgn00391…	Cp190, E(Pc), Hsf, dre4, mod(mdg4), Myb, RpII215, Scm, stwl, trx, Iswi, Hel25E, His3.3B, Dref, Gcn5, JIL-1, CtBP, Sin3A, Tip60, Nipped-B, Su(var)2-HP2, D12, REG, Ada3, Charon, Jarid2, upSET, Ada2b, sage, MBD-R2, Nup98-96, XNP, Spt5, Bap170, Nipped-A, Ino80, e(y)3, Mi-2, ver, nsl1, Lpt, Rcd5	Cellular_compartment	Up-regulated genes only
GO:0000784	nuclear chromosome, telomeric region	10	6	1.41	0.00096	FBgn0010173, FBgn0011774, FBgn0020270, FBgn0034728, FBgn0041627, FBgn0261530	RpA-70, Irbp, mre11, rad50, Ku80, nbs	Cellular_compartment	Up-regulated genes only
GO:1902562	H4 histone acetyltransferase complex	42	14	5.9	0.00122	FBgn0000046, FBgn0000581, FBgn0005617, FBgn0020388, FBgn0026080, FBgn0027490, FBgn0030891, FBgn0033897, FBgn0036483, FBgn0038016, FBgn0039904, FBgn0053554, FBgn0262527, FBgn0263832	Act87E, E(Pc), msl-1, Gcn5, Tip60, D12, Ada3, Rcd1, CG12316, MBD-R2, Hcf, Nipped-A, nsl1, Rcd5	Cellular_compartment	Up-regulated genes only
GO:0097525	spliceosomal snRNP complex	47	14	6.61	0.004	FBgn0016978, FBgn0031266, FBgn0031287, FBgn0032388, FBgn0033688, FBgn0036487, FBgn0036734, FBgn0036828, FBgn0037081, FBgn0038344, FBgn0039566, FBgn0039600, FBgn0263599, FBgn0266917	snRNP-U1-70K, Sf3b1, CG4291, CG6686, Prp8, Prp31, CG7564, CG6841, barc, obe, CG4849, CG1646, l(3)72Ab, Sf3a1	Cellular_compartment	Up-regulated genes only
GO:0032993	protein-DNA complex	25	9	3.51	0.00509	FBgn0010173, FBgn0011762, FBgn0014857, FBgn0032906, FBgn0034975, FBgn0038397, FBgn0262524, FBgn0263600, FBgn0266421	RpA-70, DNApol-alpha50, His3.3B, RPA2, enok, CG10185, ver, DNApol-delta, RPA3	Cellular_compartment	Up-regulated genes only
GO:1990391	DNA repair complex	10	5	1.41	0.00741	FBgn0004698, FBgn0015546, FBgn0030506, FBgn0036126, FBgn0261113	Xpc, spel1, DNAlig4, Irbp18, Xrp1	Cellular_compartment	Up-regulated genes only
GO:0005637	nuclear inner membrane	10	5	1.41	0.00741	FBgn0024291, FBgn0030946, FBgn0034447, FBgn0038476, FBgn0266420	Sirt1, CG6659, CG7744, kuk, Ote	Cellular_compartment	Up-regulated genes only
GO:0044427	chromosomal part	351	84	49.34	0.00908	FBgn0000246, FBgn0000283, FBgn0000541, FBgn0000581, FBgn0001222, FBgn0002183, FBgn0002781, FBgn0002914, FBgn0003277, FBgn0003862, FBgn0004362, FBgn0004913, FBgn0005617, FBgn0010173, FBgn0010278, FBgn0010762, FBgn0011604, FBgn0011638, FBgn0011762, FBgn0011774, FBgn0014857, FBgn0015615, FBgn0015754, FBgn0015799, FBgn0020270, FBgn0020309, FBgn0020388, FBgn0020412, FBgn0020496, FBgn0022764, FBgn00242…	c(3)G, Cp190, E(bx), E(Pc), Hsf, dre4, mod(mdg4), Myb, RpII215, trx, HmgD, Gnf1, msl-1, RpA-70, Ssrp, simj, Iswi, La, DNApol-alpha50, Irbp, His3.3B, SMC3, Lis-1, Rbf, mre11, crol, Gcn5, JIL-1, CtBP, Sin3A, Sirt1, flfl, Bap60, Tip60, mbo, Nipped-B, Su(var)2-HP2, CG11970, msps, chm, REG, Bap111, HP5, Ada3, lid, CG4751, CG15160, RPA2, rad50, enok, Ctr9, Jarid2, upSET, DNApol-eta, MBD-R2, Nup133, Elo…	Cellular_compartment	Up-regulated genes only
GO:0000922	spindle pole	23	8	3.23	0.01027	FBgn0013765, FBgn0015600, FBgn0015754, FBgn0026431, FBgn0026620, FBgn0027948, FBgn0031374, FBgn0036389	cnn, toc, Lis-1, Grip75, tacc, msps, Wdr62, ssp2	Cellular_compartment	Up-regulated genes only
GO:0000793	condensed chromosome	38	11	5.34	0.01286	FBgn0000246, FBgn0000283, FBgn0002638, FBgn0002781, FBgn0015615, FBgn0026427, FBgn0034728, FBgn0039004, FBgn0052438, FBgn0259876, FBgn0266282	c(3)G, Cp190, Rcc1, mod(mdg4), SMC3, Su(var)2-HP2, rad50, Nup133, SMC5, Cap-G, jnj	Cellular_compartment	Up-regulated genes only
GO:0099513	polymeric cytoskeletal fiber	80	19	11.25	0.0133	FBgn0000283, FBgn0001308, FBgn0002525, FBgn0003721, FBgn0004117, FBgn0004380, FBgn0004381, FBgn0015589, FBgn0015754, FBgn0019968, FBgn0024238, FBgn0026620, FBgn0027948, FBgn0038205, FBgn0259219, FBgn0261836, FBgn0264489, FBgn0266579, FBgn0267002	Cp190, Khc, Lam, Tm1, Tm2, Klp64D, Klp68D, Apc, Lis-1, Khc-73, Fim, tacc, msps, Kif19A, CG42319, Msp300, CG43897, tau, unc-104	Cellular_compartment	Up-regulated genes only
GO:0000791	euchromatin	24	8	3.37	0.01355	FBgn0002914, FBgn0011638, FBgn0022764, FBgn0024291, FBgn0025463, FBgn0036004, FBgn0061200, FBgn0087008	Myb, La, Sin3A, Sirt1, Bap60, Jarid2, Nup153, e(y)3	Cellular_compartment	Up-regulated genes only
GO:0070603	SWI/SNF superfamily-type complex	49	13	6.89	0.01529	FBgn0000541, FBgn0010762, FBgn0011604, FBgn0020496, FBgn0025463, FBgn0027503, FBgn0030093, FBgn0032348, FBgn0042085, FBgn0086613, FBgn0087008, FBgn0262519, FBgn0263832	E(bx), simj, Iswi, CtBP, Bap60, CG11970, Bap111, CG4751, Bap170, Ino80, e(y)3, Mi-2, Rcd5	Cellular_compartment	Up-regulated genes only
GO:0099512	supramolecular fiber	139	29	19.54	0.01699	FBgn0000283, FBgn0001308, FBgn0002525, FBgn0002772, FBgn0003149, FBgn0003721, FBgn0004117, FBgn0004169, FBgn0004380, FBgn0004381, FBgn0011296, FBgn0015589, FBgn0015754, FBgn0019968, FBgn0024238, FBgn0026059, FBgn0026620, FBgn0027948, FBgn0031692, FBgn0033926, FBgn0035410, FBgn0038205, FBgn0259209, FBgn0259219, FBgn0260442, FBgn0261836, FBgn0264489, FBgn0266579, FBgn0267002	Cp190, Khc, Lam, Mlc1, Prm, Tm1, Tm2, up, Klp64D, Klp68D, l(2)efl, Apc, Lis-1, Khc-73, Fim, Mhcl, tacc, msps, TpnC25D, Arc1, CG14964, Kif19A, Mlp60A, CG42319, rhea, Msp300, CG43897, tau, unc-104	Cellular_compartment	Up-regulated genes only
GO:0061174	type I terminal bouton	25	8	3.51	0.01753	FBgn0013759, FBgn0034691, FBgn0038659, FBgn0038816, FBgn0038975, FBgn0050021, FBgn0260632, FBgn0260934	CASK, Synj, EndoA, Lrrk, Nrx-1, metro, dl, par-1	Cellular_compartment	Up-regulated genes only
GO:0005635	nuclear envelope	99	25	13.92	0.01965	FBgn0002525, FBgn0003321, FBgn0010660, FBgn0010774, FBgn0015600, FBgn0015754, FBgn0020497, FBgn0021761, FBgn0024291, FBgn0026207, FBgn0028411, FBgn0030946, FBgn0031052, FBgn0033692, FBgn0034447, FBgn0037719, FBgn0037924, FBgn0038476, FBgn0039004, FBgn0039120, FBgn0061200, FBgn0261836, FBgn0262743, FBgn0265003, FBgn0266420	Lam, sbr, Nup214, Ref1, toc, Lis-1, emb, Nup154, Sirt1, mbo, Nxt1, CG6659, Elys, wash, CG7744, bocks, CG14712, kuk, Nup133, Nup98-96, Nup153, Msp300, Fs(2)Ket, koi, Ote	Cellular_compartment	Up-regulated genes only
GO:0099081	supramolecular polymer	141	29	19.82	0.02045	FBgn0000283, FBgn0001308, FBgn0002525, FBgn0002772, FBgn0003149, FBgn0003721, FBgn0004117, FBgn0004169, FBgn0004380, FBgn0004381, FBgn0011296, FBgn0015589, FBgn0015754, FBgn0019968, FBgn0024238, FBgn0026059, FBgn0026620, FBgn0027948, FBgn0031692, FBgn0033926, FBgn0035410, FBgn0038205, FBgn0259209, FBgn0259219, FBgn0260442, FBgn0261836, FBgn0264489, FBgn0266579, FBgn0267002	Cp190, Khc, Lam, Mlc1, Prm, Tm1, Tm2, up, Klp64D, Klp68D, l(2)efl, Apc, Lis-1, Khc-73, Fim, Mhcl, tacc, msps, TpnC25D, Arc1, CG14964, Kif19A, Mlp60A, CG42319, rhea, Msp300, CG43897, tau, unc-104	Cellular_compartment	Up-regulated genes only
GO:0098793	presynapse	136	28	19.12	0.02219	FBgn0002121, FBgn0004575, FBgn0010015, FBgn0013759, FBgn0016975, FBgn0016976, FBgn0023388, FBgn0028400, FBgn0028671, FBgn0030706, FBgn0032447, FBgn0034691, FBgn0035437, FBgn0037084, FBgn0038659, FBgn0038816, FBgn0038837, FBgn0038975, FBgn0043362, FBgn0046704, FBgn0050021, FBgn0259824, FBgn0260632, FBgn0260934, FBgn0260964, FBgn0261041, FBgn0261547, FBgn0264607	l(2)gl, Syn, CanA1, CASK, stnB, stnA, Dap160, Syt4, Vha100-1, Lrp4, PICK1, Synj, Strip, Syx6, EndoA, Lrrk, KaiR1D, Nrx-1, bchs, Liprin-alpha, metro, Hip14, dl, par-1, Vmat, stj, Exn, CaMKII	Cellular_compartment	Up-regulated genes only
GO:0099080	supramolecular complex	142	29	19.96	0.02237	FBgn0000283, FBgn0001308, FBgn0002525, FBgn0002772, FBgn0003149, FBgn0003721, FBgn0004117, FBgn0004169, FBgn0004380, FBgn0004381, FBgn0011296, FBgn0015589, FBgn0015754, FBgn0019968, FBgn0024238, FBgn0026059, FBgn0026620, FBgn0027948, FBgn0031692, FBgn0033926, FBgn0035410, FBgn0038205, FBgn0259209, FBgn0259219, FBgn0260442, FBgn0261836, FBgn0264489, FBgn0266579, FBgn0267002	Cp190, Khc, Lam, Mlc1, Prm, Tm1, Tm2, up, Klp64D, Klp68D, l(2)efl, Apc, Lis-1, Khc-73, Fim, Mhcl, tacc, msps, TpnC25D, Arc1, CG14964, Kif19A, Mlp60A, CG42319, rhea, Msp300, CG43897, tau, unc-104	Cellular_compartment	Up-regulated genes only
GO:0005856	cytoskeleton	308	56	43.3	0.02286	FBgn0000044, FBgn0000046, FBgn0000283, FBgn0001308, FBgn0002121, FBgn0002525, FBgn0002645, FBgn0002772, FBgn0003149, FBgn0003447, FBgn0003721, FBgn0004117, FBgn0004169, FBgn0004380, FBgn0004381, FBgn0010215, FBgn0010342, FBgn0013765, FBgn0013812, FBgn0015589, FBgn0015600, FBgn0015754, FBgn0016975, FBgn0019968, FBgn0023172, FBgn0024238, FBgn0026059, FBgn0026431, FBgn0026620, FBgn0027948, FBgn00300…	Act57B, Act87E, Cp190, Khc, l(2)gl, Lam, Map205, Mlc1, Prm, sn, Tm1, Tm2, up, Klp64D, Klp68D, alpha-Cat, Map60, cnn, Dhc93AB, Apc, toc, Lis-1, stnB, Khc-73, RhoGEF2, Fim, Mhcl, Grip75, tacc, msps, CG10958, Wdr62, Cep97, TpnC25D, CG5022, Cen, Oseg2, ssp2, CG9279, CG5270, Kif19A, Ttc26, RhoGAP93B, Asator, ALiX, Plp, Mlp60A, CG42319, rhea, rempA, Msp300, Ptpmeg, CG43897, wake, tau, unc-104	Cellular_compartment	Up-regulated genes only
GO:0005829	cytosol	671	112	94.33	0.02375	FBgn0000017, FBgn0000053, FBgn0000286, FBgn0000414, FBgn0000721, FBgn0001124, FBgn0001186, FBgn0001187, FBgn0001230, FBgn0002121, FBgn0002772, FBgn0003189, FBgn0003721, FBgn0004698, FBgn0004889, FBgn0005278, FBgn0010300, FBgn0010379, FBgn0011224, FBgn0011274, FBgn0013278, FBgn0015589, FBgn0016126, FBgn0019990, FBgn0020386, FBgn0020513, FBgn0020653, FBgn0024238, FBgn0024248, FBgn0024921, FBgn00275…	Abl, Gart, Cf2, Dab, for, Got1, Hex-A, Hex-C, Hsp68, l(2)gl, Mlc1, r, Tm1, Xpc, tws, Sam-S, brat, Akt1, heph, Dif, Hsp70Ba, Apc, CaMKI, Gcn2, Pdk1, Paics, Trxr-1, Fim, chico, Tnpo, cert, CG3793, trbl, Smurf, Shmt, Pink1, Tango10, Pdcd4, CG6769, CG17068, galectin, CG11835, Atg4a, Naprt, CG3008, Nfs1, CG17904, CG10189, Atg18b, Prx2540-2, trsn, CG4975, Art7, Pask, ValRS-m, UGP, CG6083, RIOK1, Pop2, …	Cellular_compartment	Up-regulated genes only
GO:0070822	Sin3-type complex	13	5	1.83	0.02633	FBgn0022764, FBgn0031759, FBgn0085451, FBgn0262714, FBgn0266000	Sin3A, lid, htk, Sap130, CG44774	Cellular_compartment	Up-regulated genes only
GO:0005719	nuclear euchromatin	13	5	1.83	0.02633	FBgn0002914, FBgn0024291, FBgn0025463, FBgn0036004, FBgn0061200	Myb, Sirt1, Bap60, Jarid2, Nup153	Cellular_compartment	Up-regulated genes only
GO:0005657	replication fork	22	7	3.09	0.02657	FBgn0004913, FBgn0010173, FBgn0011762, FBgn0032906, FBgn0037141, FBgn0263600, FBgn0266421	Gnf1, RpA-70, DNApol-alpha50, RPA2, DNApol-eta, DNApol-delta, RPA3	Cellular_compartment	Up-regulated genes only
GO:0044430	cytoskeletal part	248	46	34.86	0.02687	FBgn0000283, FBgn0001308, FBgn0002121, FBgn0002525, FBgn0002645, FBgn0002772, FBgn0003149, FBgn0003721, FBgn0004117, FBgn0004169, FBgn0004380, FBgn0004381, FBgn0010342, FBgn0013765, FBgn0013812, FBgn0015589, FBgn0015600, FBgn0015754, FBgn0019968, FBgn0023172, FBgn0024238, FBgn0026059, FBgn0026431, FBgn0026620, FBgn0027948, FBgn0030004, FBgn0031374, FBgn0031575, FBgn0031692, FBgn0032876, FBgn00353…	Cp190, Khc, l(2)gl, Lam, Map205, Mlc1, Prm, Tm1, Tm2, up, Klp64D, Klp68D, Map60, cnn, Dhc93AB, Apc, toc, Lis-1, Khc-73, RhoGEF2, Fim, Mhcl, Grip75, tacc, msps, CG10958, Wdr62, Cep97, TpnC25D, Cen, Oseg2, ssp2, CG9279, CG5270, Kif19A, Ttc26, Asator, ALiX, Plp, CG42319, rempA, Msp300, CG43897, wake, tau, unc-104	Cellular_compartment	Up-regulated genes only
GO:0005684	U2-type spliceosomal complex	27	8	3.8	0.02789	FBgn0031266, FBgn0033859, FBgn0036734, FBgn0037081, FBgn0038772, FBgn0039566, FBgn0039600, FBgn0266917	Sf3b1, fand, CG7564, barc, mdlc, CG4849, CG1646, Sf3a1	Cellular_compartment	Up-regulated genes only
GO:0005681	spliceosomal complex	169	33	23.76	0.02876	FBgn0010774, FBgn0014189, FBgn0016978, FBgn0021895, FBgn0029133, FBgn0030631, FBgn0031114, FBgn0031266, FBgn0031287, FBgn0031318, FBgn0031628, FBgn0031631, FBgn0032388, FBgn0033688, FBgn0033859, FBgn0035253, FBgn0036487, FBgn0036734, FBgn0036828, FBgn0037081, FBgn0037882, FBgn0038772, FBgn0039488, FBgn0039566, FBgn0039600, FBgn0051368, FBgn0086444, FBgn0086895, FBgn0263198, FBgn0263599, FBgn02636…	Ref1, Hel25E, snRNP-U1-70K, ytr, REG, CG6227, cactin, Sf3b1, CG4291, CG4887, CG3294, CG3225, CG6686, Prp8, fand, CG7971, Prp31, CG7564, CG6841, barc, CG17187, mdlc, CG6066, CG4849, CG1646, CG31368, l(2)37Cb, pea, Acn, l(3)72Ab, Zn72D, Cdc5, Sf3a1	Cellular_compartment	Up-regulated genes only
GO:0098687	chromosomal region	144	33	20.24	0.02973	FBgn0000283, FBgn0002183, FBgn0002781, FBgn0003277, FBgn0003862, FBgn0010173, FBgn0011774, FBgn0015754, FBgn0020270, FBgn0020388, FBgn0020412, FBgn0024555, FBgn0026080, FBgn0026427, FBgn0027948, FBgn0029133, FBgn0030301, FBgn0030891, FBgn0032906, FBgn0034728, FBgn0038016, FBgn0039004, FBgn0039120, FBgn0039338, FBgn0040273, FBgn0041627, FBgn0053554, FBgn0087008, FBgn0259876, FBgn0261530, FBgn02625…	Cp190, dre4, mod(mdg4), RpII215, trx, RpA-70, Irbp, Lis-1, mre11, Gcn5, JIL-1, flfl, Tip60, Su(var)2-HP2, msps, REG, HP5, Ada3, RPA2, rad50, MBD-R2, Nup133, Nup98-96, XNP, Spt5, Ku80, Nipped-A, e(y)3, Cap-G, nbs, ver, nsl1, Rcd5	Cellular_compartment	Up-regulated genes only
GO:0005643	nuclear pore	43	11	6.04	0.03188	FBgn0010660, FBgn0020497, FBgn0021761, FBgn0026207, FBgn0028411, FBgn0031052, FBgn0037924, FBgn0039004, FBgn0039120, FBgn0061200, FBgn0262743	Nup214, emb, Nup154, mbo, Nxt1, Elys, CG14712, Nup133, Nup98-96, Nup153, Fs(2)Ket	Cellular_compartment	Up-regulated genes only
GO:0008023	transcription elongation factor complex	33	9	4.64	0.03408	FBgn0002183, FBgn0003862, FBgn0010278, FBgn0027553, FBgn0035205, FBgn0037926, FBgn0038872, FBgn0039066, FBgn0040273	dre4, trx, Ssrp, NELF-B, Ctr9, Elp1, Nelf-A, EloA, Spt5	Cellular_compartment	Up-regulated genes only
GO:0043596	nuclear replication fork	14	5	1.97	0.03634	FBgn0010173, FBgn0011762, FBgn0032906, FBgn0263600, FBgn0266421	RpA-70, DNApol-alpha50, RPA2, DNApol-delta, RPA3	Cellular_compartment	Up-regulated genes only
GO:0005654	nucleoplasm	446	83	62.7	0.03762	FBgn0000046, FBgn0000581, FBgn0002183, FBgn0003277, FBgn0003321, FBgn0003415, FBgn0003459, FBgn0003862, FBgn0005617, FBgn0010278, FBgn0010762, FBgn0010774, FBgn0011274, FBgn0011802, FBgn0016978, FBgn0020388, FBgn0022724, FBgn0022764, FBgn0024291, FBgn0024698, FBgn0026080, FBgn0026207, FBgn0026533, FBgn0027490, FBgn0027553, FBgn0028387, FBgn0028411, FBgn0029133, FBgn0029999, FBgn0030891, FBgn00313…	Act87E, E(Pc), dre4, RpII215, sbr, skd, stwl, trx, msl-1, Ssrp, simj, Ref1, Dif, Gem3, snRNP-U1-70K, Gcn5, Taf8, Sin3A, Sirt1, Cpsf160, Tip60, mbo, Dek, D12, NELF-B, chm, Nxt1, REG, CG1575, Ada3, Charon, Bacc, lid, Daxx, CG15160, Rcd1, CG8060, MESR4, enok, MED14, Ctr9, MED4, Jarid2, CG3335, AdenoK, CG12316, MED1, srl, Fip1, CG10055, Ada2b, CG9636, bocks, CG6254, Elp1, MBD-R2, CG10185, Nelf-A, Elo…	Cellular_compartment	Up-regulated genes only
GO:0016586	RSC-type complex	10	4	1.41	0.04038	FBgn0025463, FBgn0030093, FBgn0042085, FBgn0087008	Bap60, Bap111, Bap170, e(y)3	Cellular_compartment	Up-regulated genes only
GO:0030688	preribosome, small subunit precursor	10	4	1.41	0.04038	FBgn0010926, FBgn0022069, FBgn0031643, FBgn0036187	l(3)07882, Nnp-1, CG3008, RIOK1	Cellular_compartment	Up-regulated genes only
GO:0005874	microtubule	50	12	7.03	0.04072	FBgn0000283, FBgn0001308, FBgn0004380, FBgn0004381, FBgn0015589, FBgn0015754, FBgn0019968, FBgn0026620, FBgn0027948, FBgn0038205, FBgn0266579, FBgn0267002	Cp190, Khc, Klp64D, Klp68D, Apc, Lis-1, Khc-73, tacc, msps, Kif19A, tau, unc-104	Cellular_compartment	Up-regulated genes only
GO:0032838	plasma membrane bounded cell projection cytoplasm	24	7	3.37	0.04199	FBgn0001308, FBgn0013812, FBgn0028471, FBgn0030004, FBgn0035317, FBgn0087035, FBgn0260933	Khc, Dhc93AB, Nab2, CG10958, Oseg2, AGO2, rempA	Cellular_compartment	Up-regulated genes only
GO:0000118	histone deacetylase complex	24	7	3.37	0.04199	FBgn0010762, FBgn0022764, FBgn0031759, FBgn0085451, FBgn0262519, FBgn0262714, FBgn0266000	simj, Sin3A, lid, htk, Mi-2, Sap130, CG44774	Cellular_compartment	Up-regulated genes only
GO:0015629	actin cytoskeleton	103	21	14.48	0.0477	FBgn0000044, FBgn0000046, FBgn0001308, FBgn0002121, FBgn0002772, FBgn0003149, FBgn0003447, FBgn0003721, FBgn0004117, FBgn0004169, FBgn0010215, FBgn0015754, FBgn0023172, FBgn0024238, FBgn0026059, FBgn0031692, FBgn0036882, FBgn0259209, FBgn0259219, FBgn0261836, FBgn0264489	Act57B, Act87E, Khc, l(2)gl, Mlc1, Prm, sn, Tm1, Tm2, up, alpha-Cat, Lis-1, RhoGEF2, Fim, Mhcl, TpnC25D, CG9279, Mlp60A, CG42319, Msp300, CG43897	Cellular_compartment	Up-regulated genes only
GO:0030017	sarcomere	57	13	8.01	0.04941	FBgn0003149, FBgn0003721, FBgn0004169, FBgn0011296, FBgn0026059, FBgn0031692, FBgn0033926, FBgn0035410, FBgn0259209, FBgn0259219, FBgn0260442, FBgn0261836, FBgn0264489	Prm, Tm1, up, l(2)efl, Mhcl, TpnC25D, Arc1, CG14964, Mlp60A, CG42319, rhea, Msp300, CG43897	Cellular_compartment	Up-regulated genes only
GO:0005524	ATP binding	475	106	70.35	3.7e-06	FBgn0000017, FBgn0000053, FBgn0000721, FBgn0001186, FBgn0001187, FBgn0001230, FBgn0001308, FBgn0001330, FBgn0003093, FBgn0003189, FBgn0003515, FBgn0004380, FBgn0004381, FBgn0004512, FBgn0004575, FBgn0004913, FBgn0005278, FBgn0010220, FBgn0010379, FBgn0010803, FBgn0011604, FBgn0011802, FBgn0013278, FBgn0013759, FBgn0013812, FBgn0013987, FBgn0014073, FBgn0014189, FBgn0015546, FBgn0015615, FBgn00157…	Abl, Gart, for, Hex-A, Hex-C, Hsp68, Khc, kz, Pkc98E, r, st, Klp64D, Klp68D, Mdr49, Syn, Gnf1, Sam-S, Dbp45A, Akt1, TrpRS, Iswi, Gem3, Hsp70Ba, CASK, Dhc93AB, MAPk-Ak2, Tie, Hel25E, spel1, SMC3, Nak, CaMKI, Pitslre, smid, Khc-73, Gcn2, pug, Pdk1, JIL-1, l(2)k01209, dnk, Hel89B, Mekk1, Spg7, Mhcl, TTLL4A, SRPK, Ass, LeuRS-m, Cdc7, trbl, Pink1, CG1582, DNAlig4, CG6227, CG5800, CG4822, CG31689, CG30…	Molecular_function	Up-regulated genes only
GO:0003684	damaged DNA binding	23	13	3.41	4.1e-06	FBgn0004698, FBgn0010173, FBgn0011774, FBgn0015546, FBgn0026751, FBgn0037141, FBgn0037554, FBgn0041627, FBgn0052438, FBgn0260962, FBgn0261530, FBgn0266282, FBgn0266421	Xpc, RpA-70, Irbp, spel1, XRCC1, DNApol-eta, DNApol-iota, Ku80, SMC5, pic, nbs, jnj, RPA3	Molecular_function	Up-regulated genes only
GO:0004683	calmodulin-dependent protein kinase activity	10	8	1.48	7.7e-06	FBgn0013987, FBgn0016126, FBgn0030087, FBgn0031995, FBgn0037327, FBgn0261387, FBgn0264607, FBgn0265045	MAPk-Ak2, CaMKI, CG7766, CG8475, PEK, CG17528, CaMKII, Strn-Mlck	Molecular_function	Up-regulated genes only
GO:0016879	ligase activity, forming carbon-nitrogen bonds	25	13	3.7	1.4e-05	FBgn0000052, FBgn0000053, FBgn0003189, FBgn0020385, FBgn0020513, FBgn0026147, FBgn0026565, FBgn0030336, FBgn0031589, FBgn0033225, FBgn0040319, FBgn0051108, FBgn0085453	Pfas, Gart, r, pug, Paics, TTLL4A, Ass, CG1578, Naprt, TTLL12, Gclc, TTLL5, Mthfs	Molecular_function	Up-regulated genes only
GO:0003682	chromatin binding	155	41	22.96	9.7e-05	FBgn0000283, FBgn0002183, FBgn0002525, FBgn0002638, FBgn0002781, FBgn0003862, FBgn0005617, FBgn0010278, FBgn0011274, FBgn0011604, FBgn0014857, FBgn0015615, FBgn0020388, FBgn0021761, FBgn0022764, FBgn0026080, FBgn0026207, FBgn0026401, FBgn0028979, FBgn0030891, FBgn0031052, FBgn0031317, FBgn0031434, FBgn0033692, FBgn0036398, FBgn0036483, FBgn0037027, FBgn0037555, FBgn0038016, FBgn0039120, FBgn00394…	Cp190, dre4, Lam, Rcc1, mod(mdg4), trx, msl-1, Ssrp, Dif, Iswi, His3.3B, SMC3, Gcn5, Nup154, Sin3A, Tip60, mbo, Nipped-B, tio, Ada3, Elys, Charon, insv, wash, upSET, CG12316, HIPP1, Ada2b, MBD-R2, Nup98-96, CG6066, Hcf, Spt5, Nup153, e(y)3, dl, Xrp1, Mi-2, nsl1, Lpt, Su(z)2	Molecular_function	Up-regulated genes only
GO:0004866	endopeptidase inhibitor activity	45	16	6.66	0.00044	FBgn0004629, FBgn0024293, FBgn0028983, FBgn0029133, FBgn0031558, FBgn0031560, FBgn0031561, FBgn0031563, FBgn0031973, FBgn0033574, FBgn0041180, FBgn0041182, FBgn0050046, FBgn0051313, FBgn0051778, FBgn0260635	Cys, Spn43Ab, Spn55B, REG, CG16704, CG16713, IM33, CG10031, Spn28Dc, Spn47C, Tep4, Tep2, CG30046, CG31313, CG31778, Diap1	Molecular_function	Up-regulated genes only
GO:0004364	glutathione transferase activity	34	13	5.04	0.00068	FBgn0001149, FBgn0010038, FBgn0010039, FBgn0010041, FBgn0010226, FBgn0030484, FBgn0031117, FBgn0037697, FBgn0038020, FBgn0042206, FBgn0050000, FBgn0050005, FBgn0250732	GstD1, GstD2, GstD3, GstD5, GstS1, GstT4, GstT3, GstZ2, GstD9, GstD10, GstT1, GstT2, gfzf	Molecular_function	Up-regulated genes only
GO:0004602	glutathione peroxidase activity	10	6	1.48	0.00128	FBgn0010038, FBgn0010226, FBgn0030484, FBgn0031117, FBgn0050000, FBgn0050005	GstD2, GstS1, GstT4, GstT3, GstT1, GstT2	Molecular_function	Up-regulated genes only
GO:0008139	nuclear localization sequence binding	10	6	1.48	0.00128	FBgn0010660, FBgn0024921, FBgn0037924, FBgn0039120, FBgn0061200, FBgn0262743	Nup214, Tnpo, CG14712, Nup98-96, Nup153, Fs(2)Ket	Molecular_function	Up-regulated genes only
GO:0004386	helicase activity	78	22	11.55	0.0016	FBgn0001330, FBgn0010220, FBgn0011604, FBgn0011774, FBgn0011802, FBgn0014189, FBgn0022787, FBgn0030246, FBgn0030631, FBgn0030855, FBgn0031631, FBgn0034246, FBgn0034728, FBgn0036018, FBgn0036104, FBgn0038344, FBgn0086444, FBgn0086613, FBgn0086895, FBgn0261530, FBgn0262519, FBgn0263599	kz, Dbp45A, Iswi, Irbp, Gem3, Hel25E, Hel89B, CG1582, CG6227, CG5800, CG3225, Dcr-2, rad50, CG3335, CG6418, obe, l(2)37Cb, Ino80, pea, nbs, Mi-2, l(3)72Ab	Molecular_function	Up-regulated genes only
GO:0003697	single-stranded DNA binding	33	12	4.89	0.00182	FBgn0002887, FBgn0004698, FBgn0010173, FBgn0011481, FBgn0011762, FBgn0032906, FBgn0033528, FBgn0034728, FBgn0036892, FBgn0260817, FBgn0262524, FBgn0266421	mus201, Xpc, RpA-70, Ssdp, DNApol-alpha50, RPA2, trsn, rad50, Lon, gkt, ver, RPA3	Molecular_function	Up-regulated genes only
GO:0140097	catalytic activity, acting on DNA	81	22	12	0.00271	FBgn0002887, FBgn0002891, FBgn0003082, FBgn0011604, FBgn0011762, FBgn0011774, FBgn0015351, FBgn0020270, FBgn0022787, FBgn0026015, FBgn0030506, FBgn0034246, FBgn0034728, FBgn0037141, FBgn0037554, FBgn0038344, FBgn0039016, FBgn0039593, FBgn0086613, FBgn0260817, FBgn0261530, FBgn0263600	mus201, mus205, phr, Iswi, DNApol-alpha50, Irbp, CG14906, mre11, Hel89B, Top3beta, DNAlig4, Dcr-2, rad50, DNApol-eta, DNApol-iota, obe, Dcr-1, Sid, Ino80, gkt, nbs, DNApol-delta	Molecular_function	Up-regulated genes only
GO:0061783	peptidoglycan muralytic activity	15	7	2.22	0.00331	FBgn0025827, FBgn0029765, FBgn0034162, FBgn0034165, FBgn0035734, FBgn0043578, FBgn0046999	CG6421, CG16756, CG6426, CG6435, CG14823, PGRP-SB1, CG6429	Molecular_function	Up-regulated genes only
GO:0016645	oxidoreductase activity, acting on the CH-NH group of donors	19	8	2.81	0.00371	FBgn0002036, FBgn0010222, FBgn0020385, FBgn0032945, FBgn0033465, FBgn0033820, FBgn0034276, FBgn0038516	CG10561, Nmdmc, pug, CG8665, Etf-QO, CG4716, Sardh, P5cr-2	Molecular_function	Up-regulated genes only
GO:0048037	cofactor binding	262	55	38.8	0.00371	FBgn0000153, FBgn0000261, FBgn0000406, FBgn0000568, FBgn0001112, FBgn0001124, FBgn0001125, FBgn0001977, FBgn0002641, FBgn0011769, FBgn0013773, FBgn0015714, FBgn0020496, FBgn0020653, FBgn0024291, FBgn0025454, FBgn0025456, FBgn0028940, FBgn0029158, FBgn0029783, FBgn0029823, FBgn0030588, FBgn0030589, FBgn0030593, FBgn0030737, FBgn0031148, FBgn0031689, FBgn0031713, FBgn0031813, FBgn0032393, FBgn00325…	b, Cat, Cyt-b5-r, Eip75B, Gld, Got1, Got2, CIAPIN1, mal, Fdx1, Cyp6a22, Cyp6a17, CtBP, Trxr-1, Sirt1, Cyp6g1, CREG, Cyp28a5, Las, Sirt4, Shmt, CG9521, CG9519, CG9512, Had1, Cbs, Cyp28d1, Coq6, CG9527, Nfs1, CG17904, CG10463, Cyp6a14, Cyp4p2, CG12338, CG8768, Cyp6a20, ADPS, CG4858, CG7140, CG11241, IscU, Cyp9f2, Gnmt, Cyp6d5, AOX3, Irc, Cyp12a5, Cyp12a4, CG15864, Cyp309a2, CG18749, Qtzl, gfzf, Moc…	Molecular_function	Up-regulated genes only
GO:0003824	catalytic activity	2757	473	408.32	0.00627	FBgn0000017, FBgn0000052, FBgn0000053, FBgn0000078, FBgn0000153, FBgn0000261, FBgn0000406, FBgn0000541, FBgn0000581, FBgn0000721, FBgn0001112, FBgn0001124, FBgn0001125, FBgn0001149, FBgn0001186, FBgn0001187, FBgn0001208, FBgn0001230, FBgn0001247, FBgn0001258, FBgn0001308, FBgn0001330, FBgn0001987, FBgn0002036, FBgn0002641, FBgn0002772, FBgn0002887, FBgn0002891, FBgn0003082, FBgn0003093, FBgn00031…	Abl, Pfas, Gart, Amy-d, b, Cat, Cyt-b5-r, E(bx), E(Pc), for, Gld, Got1, Got2, GstD1, Hex-A, Hex-C, Hn, Hsp68, Ide, Ldh, Khc, kz, Gli, CG10561, mal, Mlc1, mus201, mus205, phr, Pkc98E, Pp1alpha-96A, Prm, r, RpII215, sol, st, trx, up, Klp64D, Klp68D, RpIII128, Mdr49, mdy, tws, Gnf1, Sam-S, faf, CanA1, GstD2, GstD3, GstD5, Dbp45A, Nmdmc, GstS1, brat, Akt1, TrpRS, Iswi, DNApol-alpha50, Fdx1, Irbp, Gem…	Molecular_function	Up-regulated genes only
GO:0097159	organic cyclic compound binding	2023	365	299.61	0.00929	FBgn0000017, FBgn0000053, FBgn0000153, FBgn0000261, FBgn0000283, FBgn0000286, FBgn0000289, FBgn0000406, FBgn0000568, FBgn0000721, FBgn0001112, FBgn0001124, FBgn0001125, FBgn0001186, FBgn0001187, FBgn0001222, FBgn0001230, FBgn0001297, FBgn0001308, FBgn0001330, FBgn0001978, FBgn0001994, FBgn0002023, FBgn0002044, FBgn0002641, FBgn0002781, FBgn0002887, FBgn0002891, FBgn0002914, FBgn0003068, FBgn00030…	Abl, Gart, b, Cat, Cp190, Cf2, cg, Cyt-b5-r, Eip75B, for, Gld, Got1, Got2, Hex-A, Hex-C, Hsf, Hsp68, kay, Khc, kz, stc, crp, Lim3, swm, mal, mod(mdg4), mus201, mus205, Myb, per, Pkc98E, r, RpII215, sbr, slp1, stwl, sr, st, trx, HmgD, Klp64D, Klp68D, unk, RpIII128, Mdr49, Syn, Xpc, Gnf1, Sam-S, msl-1, wdn, PCNA, RpA-70, Dbp45A, Rbp9, Ssrp, brat, Akt1, NAT1, sqz, Ref1, TrpRS, l(3)07882, bol, heph, …	Molecular_function	Up-regulated genes only
GO:0016740	transferase activity	1040	191	154.03	0.01009	FBgn0000017, FBgn0000053, FBgn0000581, FBgn0000721, FBgn0001124, FBgn0001125, FBgn0001149, FBgn0001186, FBgn0001187, FBgn0002641, FBgn0002891, FBgn0003093, FBgn0003189, FBgn0003277, FBgn0003862, FBgn0004463, FBgn0004797, FBgn0005278, FBgn0010038, FBgn0010039, FBgn0010041, FBgn0010226, FBgn0010300, FBgn0010379, FBgn0011762, FBgn0013759, FBgn0013987, FBgn0014073, FBgn0014427, FBgn0015278, FBgn00153…	Abl, Gart, E(Pc), for, Got1, Got2, GstD1, Hex-A, Hex-C, mal, mus205, Pkc98E, r, RpII215, trx, RpIII128, mdy, Sam-S, GstD2, GstD3, GstD5, GstS1, brat, Akt1, DNApol-alpha50, CASK, MAPk-Ak2, Tie, CG11899, Pi3K68D, CG14906, Nak, CaMKI, Pitslre, Rca1, qm, Gcn2, Pdk1, Gcn5, JIL-1, l(2)k01209, dnk, Mekk1, agt, Ate1, CG17707, Tip60, SkpB, mei-P26, Ugt35B1, Ugt35A1, SRPK, D12, Tnks, mino, Cdc7, chm, CG379…	Molecular_function	Up-regulated genes only
GO:0043177	organic acid binding	22	8	3.26	0.01043	FBgn0003189, FBgn0019985, FBgn0029823, FBgn0031813, FBgn0034897, FBgn0038074, FBgn0040528, FBgn0042182	r, mGluR, Shmt, CG9527, Sesn, Gnmt, CG15864, CG18749	Molecular_function	Up-regulated genes only
GO:0045182	translation regulator activity	22	8	3.26	0.01043	FBgn0010300, FBgn0011206, FBgn0011224, FBgn0016070, FBgn0019990, FBgn0029823, FBgn0037327, FBgn0038100	brat, bol, heph, smg, Gcn2, Shmt, PEK, Paip2	Molecular_function	Up-regulated genes only
GO:0031406	carboxylic acid binding	22	8	3.26	0.01043	FBgn0003189, FBgn0019985, FBgn0029823, FBgn0031813, FBgn0034897, FBgn0038074, FBgn0040528, FBgn0042182	r, mGluR, Shmt, CG9527, Sesn, Gnmt, CG15864, CG18749	Molecular_function	Up-regulated genes only
GO:0004867	serine-type endopeptidase inhibitor activity	31	10	4.59	0.01117	FBgn0024293, FBgn0028983, FBgn0031558, FBgn0031560, FBgn0031561, FBgn0031563, FBgn0031973, FBgn0033574, FBgn0050046, FBgn0051778	Spn43Ab, Spn55B, CG16704, CG16713, IM33, CG10031, Spn28Dc, Spn47C, CG30046, CG31778	Molecular_function	Up-regulated genes only
GO:0030246	carbohydrate binding	60	16	8.89	0.01176	FBgn0001186, FBgn0001187, FBgn0031213, FBgn0031214, FBgn0031566, FBgn0033067, FBgn0034511, FBgn0034709, FBgn0035236, FBgn0040099, FBgn0040321, FBgn0040502, FBgn0040528, FBgn0042182, FBgn0052226, FBgn0263199	Hex-A, Hex-C, galectin, CG11374, CG2818, CG11211, GNBP-like3, Swim, CG12004, lectin-28C, GNBP3, CG8343, CG15864, CG18749, Pex23, Galk	Molecular_function	Up-regulated genes only
GO:0004402	histone acetyltransferase activity	46	13	6.81	0.01354	FBgn0000581, FBgn0020388, FBgn0026080, FBgn0027490, FBgn0028387, FBgn0030891, FBgn0031759, FBgn0034975, FBgn0037555, FBgn0039904, FBgn0053554, FBgn0087008, FBgn0263832	E(Pc), Gcn5, Tip60, D12, chm, Ada3, lid, enok, Ada2b, Hcf, Nipped-A, e(y)3, Rcd5	Molecular_function	Up-regulated genes only
GO:0016646	oxidoreductase activity, acting on the CH-NH group of donors, NAD or NADP as acceptor	11	5	1.63	0.01499	FBgn0010222, FBgn0020385, FBgn0032945, FBgn0033820, FBgn0038516	Nmdmc, pug, CG8665, CG4716, P5cr-2	Molecular_function	Up-regulated genes only
GO:0003777	microtubule motor activity	19	7	2.81	0.01514	FBgn0001308, FBgn0004380, FBgn0004381, FBgn0013812, FBgn0019968, FBgn0038205, FBgn0267002	Khc, Klp64D, Klp68D, Dhc93AB, Khc-73, Kif19A, unc-104	Molecular_function	Up-regulated genes only
GO:1901363	heterocyclic compound binding	2011	361	297.84	0.01518	FBgn0000017, FBgn0000053, FBgn0000153, FBgn0000261, FBgn0000283, FBgn0000286, FBgn0000289, FBgn0000406, FBgn0000568, FBgn0000721, FBgn0001112, FBgn0001124, FBgn0001125, FBgn0001186, FBgn0001187, FBgn0001222, FBgn0001230, FBgn0001297, FBgn0001308, FBgn0001330, FBgn0001978, FBgn0001994, FBgn0002023, FBgn0002044, FBgn0002641, FBgn0002781, FBgn0002887, FBgn0002891, FBgn0002914, FBgn0003068, FBgn00030…	Abl, Gart, b, Cat, Cp190, Cf2, cg, Cyt-b5-r, Eip75B, for, Gld, Got1, Got2, Hex-A, Hex-C, Hsf, Hsp68, kay, Khc, kz, stc, crp, Lim3, swm, mal, mod(mdg4), mus201, mus205, Myb, per, Pkc98E, r, RpII215, sbr, slp1, stwl, sr, st, trx, HmgD, Klp64D, Klp68D, unk, RpIII128, Mdr49, Syn, Xpc, Gnf1, Sam-S, msl-1, wdn, PCNA, RpA-70, Dbp45A, Rbp9, Ssrp, brat, Akt1, NAT1, sqz, Ref1, TrpRS, l(3)07882, bol, heph, …	Molecular_function	Up-regulated genes only
GO:0061733	peptide-lysine-N-acetyltransferase activity	47	13	6.96	0.01625	FBgn0000581, FBgn0020388, FBgn0026080, FBgn0027490, FBgn0028387, FBgn0030891, FBgn0031759, FBgn0034975, FBgn0037555, FBgn0039904, FBgn0053554, FBgn0087008, FBgn0263832	E(Pc), Gcn5, Tip60, D12, chm, Ada3, lid, enok, Ada2b, Hcf, Nipped-A, e(y)3, Rcd5	Molecular_function	Up-regulated genes only
GO:0017056	structural constituent of nuclear pore	20	7	2.96	0.02038	FBgn0010660, FBgn0021761, FBgn0026207, FBgn0037924, FBgn0039004, FBgn0039120, FBgn0061200	Nup214, Nup154, mbo, CG14712, Nup133, Nup98-96, Nup153	Molecular_function	Up-regulated genes only
GO:0004197	cysteine-type endopeptidase activity	29	9	4.29	0.02045	FBgn0003464, FBgn0005632, FBgn0013770, FBgn0028476, FBgn0030521, FBgn0031298, FBgn0034229, FBgn0035713, FBgn0263864	sol, faf, Cp1, Usp1, CtsB1, Atg4a, CG4847, velo, Dark	Molecular_function	Up-regulated genes only
GO:0003712	transcription coregulator activity	129	28	19.11	0.02156	FBgn0000568, FBgn0003068, FBgn0003415, FBgn0013746, FBgn0020496, FBgn0022764, FBgn0024291, FBgn0025463, FBgn0028387, FBgn0030891, FBgn0031115, FBgn0031434, FBgn0031820, FBgn0035145, FBgn0035754, FBgn0036827, FBgn0037109, FBgn0037248, FBgn0037555, FBgn0039904, FBgn0040465, FBgn0052732, FBgn0053554, FBgn0261381, FBgn0262732, FBgn0263593, FBgn0263667, FBgn0266420	Eip75B, per, skd, alien, CtBP, Sin3A, Sirt1, Bap60, chm, Ada3, CG11710, insv, Daxx, MED14, MED4, CG6843, MED1, srl, Ada2b, Hcf, Dlip3, Setd3, Nipped-A, mtTFB1, mbf1, Lpin, Lpt, Ote	Molecular_function	Up-regulated genes only
GO:0048029	monosaccharide binding	16	6	2.37	0.02206	FBgn0001186, FBgn0001187, FBgn0040099, FBgn0040528, FBgn0042182, FBgn0263199	Hex-A, Hex-C, lectin-28C, CG15864, CG18749, Galk	Molecular_function	Up-regulated genes only
GO:0005496	steroid binding	12	5	1.78	0.02261	FBgn0019985, FBgn0033052, FBgn0035538, FBgn0035849, FBgn0039801	mGluR, SCAP, DopEcR, ERR, Npc2h	Molecular_function	Up-regulated genes only
GO:0003887	DNA-directed DNA polymerase activity	12	5	1.78	0.02261	FBgn0002891, FBgn0011762, FBgn0037141, FBgn0037554, FBgn0263600	mus205, DNApol-alpha50, DNApol-eta, DNApol-iota, DNApol-delta	Molecular_function	Up-regulated genes only
GO:0030371	translation repressor activity	12	5	1.78	0.02261	FBgn0010300, FBgn0011224, FBgn0016070, FBgn0029823, FBgn0038100	brat, heph, smg, Shmt, Paip2	Molecular_function	Up-regulated genes only
GO:0034061	DNA polymerase activity	12	5	1.78	0.02261	FBgn0002891, FBgn0011762, FBgn0037141, FBgn0037554, FBgn0263600	mus205, DNApol-alpha50, DNApol-eta, DNApol-iota, DNApol-delta	Molecular_function	Up-regulated genes only
GO:0010485	H4 histone acetyltransferase activity	12	5	1.78	0.02261	FBgn0020388, FBgn0026080, FBgn0028387, FBgn0034975, FBgn0263832	Gcn5, Tip60, chm, enok, Rcd5	Molecular_function	Up-regulated genes only
GO:0034458	3'-5' RNA helicase activity	12	5	1.78	0.02261	FBgn0001330, FBgn0030246, FBgn0031631, FBgn0086444, FBgn0086895	kz, CG1582, CG3225, l(2)37Cb, pea	Molecular_function	Up-regulated genes only
GO:0016887	ATPase activity	179	36	26.51	0.03117	FBgn0000541, FBgn0001230, FBgn0001308, FBgn0003515, FBgn0004169, FBgn0004380, FBgn0004381, FBgn0004512, FBgn0004913, FBgn0011604, FBgn0013278, FBgn0013812, FBgn0015546, FBgn0016983, FBgn0022787, FBgn0024992, FBgn0028671, FBgn0031220, FBgn0031449, FBgn0032018, FBgn0032026, FBgn0032450, FBgn0032456, FBgn0033661, FBgn0034246, FBgn0035244, FBgn0036892, FBgn0038205, FBgn0039338, FBgn0039644, FBgn00398…	E(bx), Hsp68, Khc, st, up, Klp64D, Klp68D, Mdr49, Gnf1, Iswi, Hsp70Ba, Dhc93AB, spel1, smid, Hel89B, Spg7, Vha100-1, CG4822, CG31689, CG7806, CG7627, CG5776, MRP, CG13185, Dcr-2, ABCB7, Lon, Kif19A, XNP, rdog, ABCD, Vha36-3, SMC5, Ino80, Mi-2, unc-104	Molecular_function	Up-regulated genes only
GO:0016814	hydrolase activity, acting on carbon-nitrogen (but not peptide) bonds, in cyclic amidines	13	5	1.93	0.03236	FBgn0010222, FBgn0020385, FBgn0038172, FBgn0039241, FBgn0052626	Nmdmc, pug, Adgf-D, CG11089, AMPdeam	Molecular_function	Up-regulated genes only
GO:0016705	oxidoreductase activity, acting on paired donors, with incorporation or reduction of molecular oxygen	100	22	14.81	0.03363	FBgn0001208, FBgn0013773, FBgn0015714, FBgn0025454, FBgn0028940, FBgn0031689, FBgn0031713, FBgn0032149, FBgn0033302, FBgn0033395, FBgn0033980, FBgn0034075, FBgn0034748, FBgn0035187, FBgn0037659, FBgn0038037, FBgn0038194, FBgn0038680, FBgn0038681, FBgn0040528, FBgn0041337, FBgn0042182	Hn, Cyp6a22, Cyp6a17, Cyp6g1, Cyp28a5, Cyp28d1, Coq6, CG4036, Cyp6a14, Cyp4p2, Cyp6a20, Asph, CG17807, Trh, Kdm2, Cyp9f2, Cyp6d5, Cyp12a5, Cyp12a4, CG15864, Cyp309a2, CG18749	Molecular_function	Up-regulated genes only
GO:0005506	iron ion binding	89	20	13.18	0.03384	FBgn0001208, FBgn0013773, FBgn0015222, FBgn0015714, FBgn0025454, FBgn0028940, FBgn0031689, FBgn0033302, FBgn0033395, FBgn0033980, FBgn0035187, FBgn0037637, FBgn0038037, FBgn0038194, FBgn0038349, FBgn0038680, FBgn0038681, FBgn0040528, FBgn0041337, FBgn0042182	Hn, Cyp6a22, Fer1HCH, Cyp6a17, Cyp6g1, Cyp28a5, Cyp28d1, Cyp6a14, Cyp4p2, Cyp6a20, Trh, IscU, Cyp9f2, Cyp6d5, AOX3, Cyp12a5, Cyp12a4, CG15864, Cyp309a2, CG18749	Molecular_function	Up-regulated genes only
GO:0003713	transcription coactivator activity	62	15	9.18	0.0339	FBgn0000568, FBgn0020496, FBgn0025463, FBgn0028387, FBgn0030891, FBgn0031115, FBgn0035754, FBgn0037248, FBgn0037555, FBgn0039904, FBgn0040465, FBgn0052732, FBgn0262732, FBgn0263593, FBgn0263667	Eip75B, CtBP, Bap60, chm, Ada3, CG11710, MED4, srl, Ada2b, Hcf, Dlip3, Setd3, mbf1, Lpin, Lpt	Molecular_function	Up-regulated genes only
GO:0043167	ion binding	1514	273	224.23	0.03589	FBgn0000017, FBgn0000053, FBgn0000078, FBgn0000153, FBgn0000395, FBgn0000568, FBgn0000721, FBgn0001075, FBgn0001112, FBgn0001124, FBgn0001125, FBgn0001186, FBgn0001187, FBgn0001208, FBgn0001230, FBgn0001247, FBgn0001308, FBgn0001330, FBgn0001978, FBgn0002044, FBgn0002641, FBgn0002772, FBgn0003093, FBgn0003189, FBgn0003334, FBgn0003515, FBgn0003862, FBgn0004169, FBgn0004380, FBgn0004381, FBgn00043…	Abl, Gart, Amy-d, b, cv-2, Eip75B, for, ft, Gld, Got1, Got2, Hex-A, Hex-C, Hn, Hsp68, Ide, Khc, kz, stc, swm, mal, Mlc1, Pkc98E, r, Scm, st, trx, up, Klp64D, Klp68D, unk, Mdr49, Syn, Eip63F-1, Gnf1, Sam-S, Dbp45A, Nmdmc, brat, Akt1, TrpRS, Iswi, Gem3, Hsp70Ba, TpnC41C, CASK, Cyp6a22, Dhc93AB, MAPk-Ak2, Tie, Hel25E, Hr38, Fer1HCH, Pi3K68D, spel1, SMC3, Dref, Cyp6a17, Nak, CaMKI, Pitslre, smid, Khc…	Molecular_function	Up-regulated genes only
GO:0003729	mRNA binding	165	33	24.44	0.04063	FBgn0002044, FBgn0010263, FBgn0010300, FBgn0010488, FBgn0010774, FBgn0011206, FBgn0011224, FBgn0011638, FBgn0016070, FBgn0016978, FBgn0021895, FBgn0024698, FBgn0028471, FBgn0029823, FBgn0031266, FBgn0031318, FBgn0031628, FBgn0032620, FBgn0033926, FBgn0034246, FBgn0034598, FBgn0035235, FBgn0036018, FBgn0036317, FBgn0036661, FBgn0036734, FBgn0036735, FBgn0037081, FBgn0037248, FBgn0040273, FBgn00513…	swm, Rbp9, brat, NAT1, Ref1, bol, heph, La, smg, snRNP-U1-70K, ytr, Cpsf160, Nab2, Shmt, Sf3b1, CG4887, CG3294, CG12288, Arc1, Dcr-2, CG4266, CG7879, CG3335, CG10948, CG9705, CG7564, Edc3, barc, srl, Spt5, CG31368, mbf1, Unr	Molecular_function	Up-regulated genes only
GO:0050662	coenzyme binding	142	29	21.03	0.04138	FBgn0000153, FBgn0001112, FBgn0001124, FBgn0001125, FBgn0002641, FBgn0020496, FBgn0020653, FBgn0024291, FBgn0029783, FBgn0029823, FBgn0030588, FBgn0030589, FBgn0030593, FBgn0030737, FBgn0031148, FBgn0031713, FBgn0031813, FBgn0032393, FBgn0032819, FBgn0033543, FBgn0033769, FBgn0033983, FBgn0037147, FBgn0037186, FBgn0038074, FBgn0038349, FBgn0040528, FBgn0042182, FBgn0051864	b, Gld, Got1, Got2, mal, CtBP, Trxr-1, Sirt1, Sirt4, Shmt, CG9521, CG9519, CG9512, Had1, Cbs, Coq6, CG9527, Nfs1, CG10463, CG12338, CG8768, ADPS, CG7140, CG11241, Gnmt, AOX3, CG15864, CG18749, Qtzl	Molecular_function	Up-regulated genes only
GO:0003724	RNA helicase activity	48	12	7.11	0.04335	FBgn0001330, FBgn0010220, FBgn0011802, FBgn0014189, FBgn0030246, FBgn0030631, FBgn0030855, FBgn0031631, FBgn0036104, FBgn0086444, FBgn0086895, FBgn0263599	kz, Dbp45A, Gem3, Hel25E, CG1582, CG6227, CG5800, CG3225, CG6418, l(2)37Cb, pea, l(3)72Ab	Molecular_function	Up-regulated genes only
GO:0090079	translation regulator activity, nucleic acid binding	14	5	2.07	0.04437	FBgn0011206, FBgn0011224, FBgn0016070, FBgn0029823, FBgn0038100	bol, heph, smg, Shmt, Paip2	Molecular_function	Up-regulated genes only
GO:0031491	nucleosome binding	14	5	2.07	0.04437	FBgn0002183, FBgn0010278, FBgn0011604, FBgn0014857, FBgn0262519	dre4, Ssrp, Iswi, His3.3B, Mi-2	Molecular_function	Up-regulated genes only
GO:0070279	vitamin B6 binding	33	9	4.89	0.04572	FBgn0000153, FBgn0001124, FBgn0001125, FBgn0002641, FBgn0029823, FBgn0031148, FBgn0032393, FBgn0037186, FBgn0051864	b, Got1, Got2, mal, Shmt, Cbs, Nfs1, CG11241, Qtzl	Molecular_function	Up-regulated genes only
GO:0030170	pyridoxal phosphate binding	33	9	4.89	0.04572	FBgn0000153, FBgn0001124, FBgn0001125, FBgn0002641, FBgn0029823, FBgn0031148, FBgn0032393, FBgn0037186, FBgn0051864	b, Got1, Got2, mal, Shmt, Cbs, Nfs1, CG11241, Qtzl	Molecular_function	Up-regulated genes only
GO:0000900	translation repressor activity, mRNA regulatory element binding	10	4	1.48	0.04784	FBgn0011224, FBgn0016070, FBgn0029823, FBgn0038100	heph, smg, Shmt, Paip2	Molecular_function	Up-regulated genes only
GO:0043169	cation binding	757	128	112.11	0.04881	FBgn0000053, FBgn0000078, FBgn0000568, FBgn0001075, FBgn0001208, FBgn0001247, FBgn0001978, FBgn0002044, FBgn0002641, FBgn0002772, FBgn0003189, FBgn0003334, FBgn0003862, FBgn0004169, FBgn0004395, FBgn0004910, FBgn0010222, FBgn0010300, FBgn0013348, FBgn0013773, FBgn0014859, FBgn0015222, FBgn0015664, FBgn0015714, FBgn0020248, FBgn0020270, FBgn0023388, FBgn0024238, FBgn0024289, FBgn0024992, FBgn00251…	Gart, Amy-d, Eip75B, ft, Hn, Ide, stc, swm, mal, Mlc1, r, Scm, trx, up, unk, Eip63F-1, Nmdmc, brat, TpnC41C, Cyp6a22, Hr38, Fer1HCH, Dref, Cyp6a17, stet, mre11, Dap160, Fim, Sodh-1, Spg7, az2, Cyp6g1, mei-P26, Sara, HDAC6, hang, CG7115, chm, Nab2, CG3530, Cyp28a5, Shmt, CG2202, CG1582, hiw, CG8206, Lrp4, CG4678, Ubr1, CG6769, CG11710, CG4291, CG2991, CG3294, Cyp28d1, TpnC25D, Ufd4, CG10623, Swip-…	Molecular_function	Up-regulated genes only

## Sheet: Func_enrichment_table_UpDownreg
GO.ID	å	Annotated genes	Significant genes	Enrichment	P- value	Ensembl ID	Gene Symbol	Ontology.Source	Enrichment_for
GO:0002181	cytoplasmic translation	113	74	36.38	2.7e-13	FBgn0001942, FBgn0002579, FBgn0002590, FBgn0002622, FBgn0002626, FBgn0003274, FBgn0003279, FBgn0003517, FBgn0003941, FBgn0003942, FBgn0004867, FBgn0004882, FBgn0005533, FBgn0005593, FBgn0010078, FBgn0010265, FBgn0010408, FBgn0010409, FBgn0010411, FBgn0010412, FBgn0011272, FBgn0011284, FBgn0013325, FBgn0014026, FBgn0015218, FBgn0015288, FBgn0015521, FBgn0015756, FBgn0016726, FBgn0017545, FBgn00175…	eIF4A, RpL36, RpS5a, RpS3, RpL32, RpLP2, RpL4, sta, RpL40, RpS27A, RpS2, orb, RpS17, RpL7, RpL23, RpS13, RpS9, RpL18A, RpS18, RpS19a, RpL13, RpS4, RpL11, RpL7A, eIF4E1, RpL22, RpS21, RpL9, RpL29, RpS3A, RpL14, eRF3, RpL3, RpL39, RpL10, RpL35, RpL17, RpS28b, CG1578, RpL37a, RpL36A, RpL24, RpL21, RpS11, RpS23, RpS15, RpS16, CNBP, RpL12, RpL28, eIF1, RpL18, Dph1, RpL10Ab, RpL26, eIF3a, RpL35A, RpL13…	Biological_pathways	Up- and donw-regulated genes
GO:0010499	proteasomal ubiquitin-independent protein catabolic process	14	13	4.51	3.8e-06	FBgn0002284, FBgn0004066, FBgn0010590, FBgn0016697, FBgn0023174, FBgn0023175, FBgn0026380, FBgn0029134, FBgn0032596, FBgn0086134, FBgn0250746, FBgn0250843, FBgn0261394	Prosbeta6, Prosalpha4, Prosbeta1, Prosalpha5, Prosbeta2, Prosalpha7, Prosbeta3, Prosbeta5, Prosbeta4, Prosalpha2, Prosbeta7, Prosalpha6, Prosalpha3	Biological_pathways	Up- and donw-regulated genes
GO:0055114	oxidation-reduction process	401	170	129.11	6.5e-06	FBgn0000261, FBgn0000565, FBgn0001091, FBgn0001092, FBgn0001098, FBgn0001112, FBgn0001128, FBgn0001208, FBgn0001248, FBgn0001258, FBgn0001989, FBgn0002036, FBgn0002719, FBgn0002937, FBgn0003071, FBgn0003388, FBgn0003462, FBgn0004057, FBgn0005626, FBgn0010222, FBgn0011211, FBgn0011361, FBgn0011576, FBgn0012036, FBgn0013773, FBgn0015031, FBgn0015037, FBgn0015038, FBgn0015623, FBgn0015714, FBgn00196…	Cat, Eip71CD, Gapdh1, Gapdh2, Gdh, Gld, Gpdh1, Hn, Idh, Ldh, ND-B17, CG10561, Men, ninaB, Pfk, shd, Sod1, Zw, ple, Nmdmc, blw, ND-ACP, Cyp4d2, Aldh, Cyp6a22, cype, Cyp4p1, Cyp9b1, Cpr, Cyp6a17, COX5A, pug, CtBP, Rack1, Trxr-1, Gpo1, D2hgdh, CG17896, Sodh-1, Irp-1B, Thiolase, Cyp6g1, CG4199, Idh3a, CG10863, Mtpalpha, aralar1, Cyp28a5, Men-b, ND-ASHI, Pink1, ND-MNLL, sni, CG7766, CG9521, CG9519, CG…	Biological_pathways	Up- and donw-regulated genes
GO:0007218	neuropeptide signaling pathway	45	29	14.49	8.5e-06	FBgn0000500, FBgn0003255, FBgn0004622, FBgn0011581, FBgn0012344, FBgn0013767, FBgn0023178, FBgn0027109, FBgn0028374, FBgn0028418, FBgn0031770, FBgn0032048, FBgn0032336, FBgn0032840, FBgn0035023, FBgn0035092, FBgn0035331, FBgn0036713, FBgn0037408, FBgn0037976, FBgn0038880, FBgn0039722, FBgn0040813, FBgn0041707, FBgn0042201, FBgn0045038, FBgn0053527, FBgn0260753, FBgn0266429	Dsk, rk, TkR99D, Ms, Dh44, Crz, Pdf, NPF, Hug, Lk, CG13995, Dh31, AstC, sNPF, ITP, Nplp1, MsR1, Mip, NPFR, Tk, SIFaR, Capa, Nplp2, Ilp2, Nplp3, Proc, SIFa, Pdfr, AstA-R1	Biological_pathways	Up- and donw-regulated genes
GO:1901606	alpha-amino acid catabolic process	47	33	15.13	4.7e-05	FBgn0001098, FBgn0001125, FBgn0001145, FBgn0001208, FBgn0003423, FBgn0003965, FBgn0004516, FBgn0014455, FBgn0016013, FBgn0022774, FBgn0023535, FBgn0023537, FBgn0025720, FBgn0027945, FBgn0029823, FBgn0030653, FBgn0031860, FBgn0032287, FBgn0033543, FBgn0034276, FBgn0034390, FBgn0036762, FBgn0036992, FBgn0036997, FBgn0037138, FBgn0037684, FBgn0037697, FBgn0039094, FBgn0040211, FBgn0042083, FBgn02610…	Gdh, Got2, Gs2, Hn, slgA, v, Gad1, Ahcy, Faa, Oat, arg, CG17896, Ate1, ppl, Shmt, CG7860, CG11236, CG6415, CG12338, Sardh, CG15093, CG7430, Hpd, CG5955, P5CDh1, Srr, GstZ2, CG10184, hgo, Mccc2, TER94, GLS, Dark	Biological_pathways	Up- and donw-regulated genes
GO:0006575	cellular modified amino acid metabolic process	72	39	23.18	8.8e-05	FBgn0001149, FBgn0003162, FBgn0010038, FBgn0010039, FBgn0010041, FBgn0010222, FBgn0010226, FBgn0014455, FBgn0020385, FBgn0026565, FBgn0027590, FBgn0028399, FBgn0029823, FBgn0030484, FBgn0030932, FBgn0031117, FBgn0032726, FBgn0032727, FBgn0032945, FBgn0034276, FBgn0036157, FBgn0037010, FBgn0037697, FBgn0038020, FBgn0038074, FBgn0039776, FBgn0040319, FBgn0040528, FBgn0042182, FBgn0042206, FBgn00461…	GstD1, Pu, GstD2, GstD3, GstD5, Nmdmc, GstS1, Ahcy, pug, Ass, GstE12, TMS1, Shmt, GstT4, Ggt-1, GstT3, CG10621, CG10623, CG8665, Sardh, CG7560, CG4825, GstZ2, GstD9, Gnmt, PH4alphaEFB, Gclc, CG15864, CG18749, GstD10, Gclm, GstT1, GstT2, GstE9, Mthfs, se, gfzf, whd, Dark	Biological_pathways	Up- and donw-regulated genes
GO:0042391	regulation of membrane potential	70	38	22.54	0.0001	FBgn0000036, FBgn0000535, FBgn0001134, FBgn0001220, FBgn0003380, FBgn0003429, FBgn0004244, FBgn0010399, FBgn0011589, FBgn0011661, FBgn0015519, FBgn0015664, FBgn0016120, FBgn0017561, FBgn0024963, FBgn0026439, FBgn0029147, FBgn0029761, FBgn0029891, FBgn0030707, FBgn0031261, FBgn0031424, FBgn0033244, FBgn0033257, FBgn0037690, FBgn0038165, FBgn0039081, FBgn0039647, FBgn0040752, FBgn0085387, FBgn00854…	nAChRalpha1, eag, Grd, Hsc70-5, Sh, slo, Rdl, Nmdar1, Elk, Moe, nAChRalpha3, Dref, ATPsynD, Ork1, GluClalpha, Eaat1, NtR, SK, Pink1, CG8916, nAChRbeta3, VGlut, CG8726, sand, Task7, Task6, Irk2, jus, Prosap, shakB, NaCP60E, CG42594, Shab, Ih, Slob, Ca-alpha1T, Fife, Piezo	Biological_pathways	Up- and donw-regulated genes
GO:0009612	response to mechanical stimulus	22	16	7.08	0.00011	FBgn0000536, FBgn0002921, FBgn0004244, FBgn0004516, FBgn0010473, FBgn0027575, FBgn0028396, FBgn0032946, FBgn0033159, FBgn0039152, FBgn0039647, FBgn0039915, FBgn0086355, FBgn0261794, FBgn0264953, FBgn0265434	eas, Atpalpha, Rdl, Gad1, tutl, GABA-B-R2, TotA, nrv3, Dscam1, Root, jus, Gat, Tpi, kcc, Piezo, zip	Biological_pathways	Up- and donw-regulated genes
GO:0055085	transmembrane transport	407	181	131.04	0.00012	FBgn0000036, FBgn0000180, FBgn0000241, FBgn0000535, FBgn0001134, FBgn0001296, FBgn0002917, FBgn0002921, FBgn0003380, FBgn0003429, FBgn0003515, FBgn0003861, FBgn0004244, FBgn0004363, FBgn0004512, FBgn0004611, FBgn0005564, FBgn0005671, FBgn0010217, FBgn0010497, FBgn0010638, FBgn0010747, FBgn0011211, FBgn0011584, FBgn0011589, FBgn0011672, FBgn0013953, FBgn0013995, FBgn0014391, FBgn0015222, FBgn00152…	nAChRalpha1, bib, bw, eag, Grd, kar, na, Atpalpha, Sh, slo, st, trp, Rdl, porin, Mdr49, Plc21C, Shal, Vha55, ATPsynbeta, dmGlut, Sec61beta, Srp54k, blw, Trp1, Elk, Mvl, Esp, Calx, sun, Fer1HCH, Hsp60A, nAChRalpha3, nrv2, Tom40, ATPsynCF6, ATPsynD, ATPsynO, Ork1, ATPsynB, Orct, ATPsyngamma, Vha36-1, Mct1, Picot, GluClalpha, CG3164, MFS18, Mpcp2, Eaat1, Dic1, VhaSFD, JhI-21, aralar1, VhaPPA1-1, Vha…	Biological_pathways	Up- and donw-regulated genes
GO:0045187	regulation of circadian sleep/wake cycle, sleep	33	21	10.63	0.0002	FBgn0000273, FBgn0001233, FBgn0003068, FBgn0003380, FBgn0011204, FBgn0014396, FBgn0019643, FBgn0023076, FBgn0025680, FBgn0027348, FBgn0028519, FBgn0033257, FBgn0033528, FBgn0035187, FBgn0053527, FBgn0261268, FBgn0261953, FBgn0262593, FBgn0263397, FBgn0265784, FBgn0266418	Pka-C1, Hsp83, per, Sh, cue, tim, AANAT1, Clk, cry, bgm, hll, sand, trsn, Trh, SIFa, Cul3, TfAP-2, Shab, Ih, CrebB, wake	Biological_pathways	Up- and donw-regulated genes
GO:0009605	response to external stimulus	775	301	249.53	0.00021	FBgn0000017, FBgn0000024, FBgn0000120, FBgn0000173, FBgn0000370, FBgn0000414, FBgn0000504, FBgn0000536, FBgn0000568, FBgn0000581, FBgn0000721, FBgn0001222, FBgn0001230, FBgn0001247, FBgn0001257, FBgn0001297, FBgn0001308, FBgn0001319, FBgn0002023, FBgn0002921, FBgn0002937, FBgn0002938, FBgn0002940, FBgn0003067, FBgn0003068, FBgn0003090, FBgn0003134, FBgn0003218, FBgn0003371, FBgn0003380, FBgn00034…	Abl, Ace, Arr1, ben, crc, Dab, dsx, eas, Eip75B, E(Pc), for, Hsf, Hsp68, Ide, ImpL2, kay, Khc, kn, Lim3, Atpalpha, ninaB, ninaC, ninaE, Pepck1, per, pk, Pp1alpha-96A, rdgB, sgg, Sh, slgA, stwl, svp, trp, trx, betaTub60D, tup, ush, Yp3, uzip, ct, nonA, Rdl, porin, 18w, Ptp10D, Klp64D, Ten-m, Gad1, pros, zfh1, Plc21C, gl, Gbeta76C, ogre, N, Ac76E, Ggamma1, ple, faf, nvy, PCNA, Con, betaCOP, brat, C…	Biological_pathways	Up- and donw-regulated genes
GO:0006536	glutamate metabolic process	12	10	3.86	0.00039	FBgn0001098, FBgn0001124, FBgn0001125, FBgn0001145, FBgn0003423, FBgn0004516, FBgn0022774, FBgn0036927, FBgn0037138, FBgn0261625	Gdh, Got1, Got2, Gs2, slgA, Gad1, Oat, Gabat, P5CDh1, GLS	Biological_pathways	Up- and donw-regulated genes
GO:0006006	glucose metabolic process	30	19	9.66	0.00044	FBgn0001091, FBgn0001092, FBgn0001112, FBgn0003067, FBgn0003071, FBgn0004057, FBgn0020618, FBgn0027550, FBgn0027580, FBgn0032820, FBgn0032840, FBgn0034950, FBgn0036428, FBgn0037147, FBgn0038074, FBgn0043783, FBgn0086355, FBgn0250906, FBgn0266064	Gapdh1, Gapdh2, Gld, Pepck1, Pfk, Zw, Rack1, CG6495, PCB, fbp, sNPF, Pask, Gbs-70E, CG7140, Gnmt, CG32444, Tpi, Pgk, GlyS	Biological_pathways	Up- and donw-regulated genes
GO:0008306	associative learning	48	27	15.45	0.00048	FBgn0000273, FBgn0000536, FBgn0003371, FBgn0003731, FBgn0003861, FBgn0004244, FBgn0004516, FBgn0004575, FBgn0004638, FBgn0004907, FBgn0005564, FBgn0005672, FBgn0010399, FBgn0011582, FBgn0013334, FBgn0015269, FBgn0015380, FBgn0024248, FBgn0024944, FBgn0035538, FBgn0037140, FBgn0038975, FBgn0039747, FBgn0041188, FBgn0259243, FBgn0262739, FBgn0263916	Pka-C1, eas, sgg, Egfr, trp, Rdl, Gad1, Syn, drk, 14-3-3zeta, Shal, spi, Nmdar1, Dop1R1, Sap47, Nf1, drl, chico, Oamb, DopEcR, SLC22A, Nrx-1, AdoR, Atx2, Pka-R1, AGO1, Ent2	Biological_pathways	Up- and donw-regulated genes
GO:0009065	glutamine family amino acid catabolic process	14	11	4.51	0.00049	FBgn0001098, FBgn0001145, FBgn0003423, FBgn0004516, FBgn0022774, FBgn0023535, FBgn0025720, FBgn0030653, FBgn0037138, FBgn0261014, FBgn0261625	Gdh, Gs2, slgA, Gad1, Oat, arg, Ate1, CG7860, P5CDh1, TER94, GLS	Biological_pathways	Up- and donw-regulated genes
GO:1990709	presynaptic active zone organization	16	12	5.15	0.00055	FBgn0004449, FBgn0005586, FBgn0030706, FBgn0031866, FBgn0034691, FBgn0039883, FBgn0046704, FBgn0250789, FBgn0259246, FBgn0262483, FBgn0264606, FBgn0267001	Ten-m, Rab3, Lrp4, Nlg2, Synj, RhoGAP100F, Liprin-alpha, alpha-Spec, brp, Rbp, Fife, Ten-a	Biological_pathways	Up- and donw-regulated genes
GO:0007600	sensory perception	162	78	52.16	0.00066	FBgn0000120, FBgn0000241, FBgn0000535, FBgn0002917, FBgn0002921, FBgn0002940, FBgn0003218, FBgn0003380, FBgn0003656, FBgn0003861, FBgn0004198, FBgn0004227, FBgn0004380, FBgn0004381, FBgn0004595, FBgn0004618, FBgn0004622, FBgn0005664, FBgn0010399, FBgn0011280, FBgn0011282, FBgn0011283, FBgn0011672, FBgn0013812, FBgn0014019, FBgn0015721, FBgn0015777, FBgn0024150, FBgn0025680, FBgn0029948, FBgn00307…	Arr1, bw, eag, na, Atpalpha, ninaE, rdgB, Sh, sws, trp, ct, nonA, Klp64D, Klp68D, pros, gl, TkR99D, Crys, Nmdar1, Obp19d, Obp84a, Obp28a, Mvl, Dhc93AB, Rh5, ktub, nrv2, Ac78C, cry, CheA7a, dpr18, Obp19b, Ir25a, CG8086, CheB38c, nrv3, Cyp6w1, Dscam1, Obp44a, Obp56d, Obp56e, Obp56h, Obp57c, Rh7, CheA75a, Ir76b, CG14636, dpr16, ninaG, dpr5, Tk, ATP8B, subdued, Root, Obp99a, Obp99b, dpr6, OS9, Obp56f…	Biological_pathways	Up- and donw-regulated genes
GO:0006979	response to oxidative stress	116	54	37.35	0.0008	FBgn0000173, FBgn0000261, FBgn0000565, FBgn0001248, FBgn0003068, FBgn0003462, FBgn0005626, FBgn0010015, FBgn0010226, FBgn0010379, FBgn0011205, FBgn0014391, FBgn0015269, FBgn0016120, FBgn0024329, FBgn0024944, FBgn0026575, FBgn0028396, FBgn0029891, FBgn0030334, FBgn0030876, FBgn0031436, FBgn0031589, FBgn0031820, FBgn0031971, FBgn0032685, FBgn0032935, FBgn0033518, FBgn0033631, FBgn0034897, FBgn00360…	ben, Cat, Eip71CD, Idh, per, Sod1, ple, CanA1, GstS1, Akt1, fbl, sun, Nf1, ATPsynD, Mekk1, Oamb, hang, TotA, Pink1, Karl, CG6762, ND-B17.2, Naprt, Daxx, Sirup, CG10211, Atg18b, Prx2540-2, Sod3, Sesn, iPLA2-VIA, chrb, srl, foxo, Gyc89Da, Gyc89Db, Irc, Prx3, Prx5, wfs1, Sid, Trx-2, Jafrac1, scyl, TotC, Naam, alph, mol, Thor, whd, cd, Ric, Pde8, p38c	Biological_pathways	Up- and donw-regulated genes
GO:0006790	sulfur compound metabolic process	124	57	39.93	0.00086	FBgn0000565, FBgn0001149, FBgn0001977, FBgn0003965, FBgn0005278, FBgn0010038, FBgn0010039, FBgn0010041, FBgn0010226, FBgn0010611, FBgn0012034, FBgn0014455, FBgn0020236, FBgn0020251, FBgn0020389, FBgn0027590, FBgn0028325, FBgn0029158, FBgn0030484, FBgn0030662, FBgn0030932, FBgn0031117, FBgn0031148, FBgn0032393, FBgn0032597, FBgn0032726, FBgn0032727, FBgn0034143, FBgn0034145, FBgn0034215, FBgn00342…	Eip71CD, GstD1, CIAPIN1, v, Sam-S, GstD2, GstD3, GstD5, GstS1, Hmgs, AcCoAS, Ahcy, ATPCL, sfl, Papss, GstE12, Pdha, Las, GstT4, CG9220, Ggt-1, GstT3, Cbs, Nfs1, CG17904, CG10621, CG10623, CG8303, CG5065, Mtap, Sardh, ABCB7, CG7560, CG7430, CG4858, Mms19, IscU, ScsbetaA, GstZ2, CG8199, GstD9, Gnmt, Pdhb, CG7920, CG1774, Gclc, GstD10, Gclm, GstT1, GstT2, CG31637, Qtzl, GstE9, se, Tpst, gfzf, Dark	Biological_pathways	Up- and donw-regulated genes
GO:0044057	regulation of system process	59	31	19	0.00091	FBgn0000500, FBgn0000535, FBgn0000721, FBgn0001134, FBgn0004169, FBgn0004244, FBgn0004622, FBgn0011581, FBgn0011582, FBgn0013767, FBgn0014396, FBgn0016076, FBgn0017561, FBgn0023076, FBgn0023169, FBgn0024944, FBgn0026439, FBgn0027356, FBgn0027556, FBgn0029891, FBgn0032336, FBgn0037140, FBgn0037976, FBgn0039770, FBgn0039938, FBgn0040752, FBgn0041188, FBgn0045038, FBgn0063485, FBgn0262593, FBgn02627…	Dsk, eag, for, Grd, up, Rdl, TkR99D, Ms, Dop1R1, Crz, tim, vri, Ork1, Clk, AMPKalpha, Oamb, Eaat1, Amph, CG4928, Pink1, AstC, SLC22A, Tk, CG15537, Sox102F, Prosap, Atx2, Proc, Lasp, Shab, AGO1	Biological_pathways	Up- and donw-regulated genes
GO:0097090	presynaptic membrane organization	11	9	3.54	0.00102	FBgn0001987, FBgn0004449, FBgn0031866, FBgn0034972, FBgn0038975, FBgn0051146, FBgn0083963, FBgn0083975, FBgn0267001	Gli, Ten-m, Nlg2, CG10339, Nrx-1, Nlg1, Nlg3, Nlg4, Ten-a	Biological_pathways	Up- and donw-regulated genes
GO:0042749	regulation of circadian sleep/wake cycle	39	27	12.56	0.00108	FBgn0000273, FBgn0001233, FBgn0003068, FBgn0003380, FBgn0004244, FBgn0011204, FBgn0014396, FBgn0019643, FBgn0023076, FBgn0023178, FBgn0024944, FBgn0025680, FBgn0027348, FBgn0028519, FBgn0032048, FBgn0033257, FBgn0033528, FBgn0035187, FBgn0036927, FBgn0053527, FBgn0260753, FBgn0261268, FBgn0261953, FBgn0262593, FBgn0263397, FBgn0265784, FBgn0266418	Pka-C1, Hsp83, per, Sh, Rdl, cue, tim, AANAT1, Clk, Pdf, Oamb, cry, bgm, hll, Dh31, sand, trsn, Trh, Gabat, SIFa, Pdfr, Cul3, TfAP-2, Shab, Ih, CrebB, wake	Biological_pathways	Up- and donw-regulated genes
GO:0001941	postsynaptic membrane organization	13	10	4.19	0.0012	FBgn0001987, FBgn0004449, FBgn0031866, FBgn0034972, FBgn0038975, FBgn0051146, FBgn0083963, FBgn0083975, FBgn0265416, FBgn0267001	Gli, Ten-m, Nlg2, CG10339, Nrx-1, Nlg1, Nlg3, Nlg4, Neto, Ten-a	Biological_pathways	Up- and donw-regulated genes
GO:0006096	glycolytic process	15	11	4.83	0.00129	FBgn0000579, FBgn0001091, FBgn0001092, FBgn0001186, FBgn0001187, FBgn0003071, FBgn0004647, FBgn0014869, FBgn0038957, FBgn0086355, FBgn0250906	Eno, Gapdh1, Gapdh2, Hex-A, Hex-C, Pfk, N, Pglym78, CG7059, Tpi, Pgk	Biological_pathways	Up- and donw-regulated genes
GO:0042493	response to drug	155	68	49.91	0.00138	FBgn0000037, FBgn0000173, FBgn0000261, FBgn0000273, FBgn0002917, FBgn0003068, FBgn0003093, FBgn0003371, FBgn0003380, FBgn0003429, FBgn0003731, FBgn0004244, FBgn0004512, FBgn0004575, FBgn0005626, FBgn0005672, FBgn0010015, FBgn0010399, FBgn0010497, FBgn0012034, FBgn0012036, FBgn0013759, FBgn0013767, FBgn0013949, FBgn0017590, FBgn0023076, FBgn0023129, FBgn0024150, FBgn0024291, FBgn0025454, FBgn00264…	mAChR-A, ben, Cat, Pka-C1, na, per, Pkc98E, sgg, Sh, slo, Egfr, Rdl, Mdr49, Syn, ple, spi, CanA1, Nmdar1, dmGlut, AcCoAS, Aldh, CASK, Crz, Elal, klg, Clk, aay, Ac78C, Sirt1, Cyp6g1, Eaat1, hang, Agpat2, Dic1, Syt4, aralar1, Shmt, VGlut, Bacc, Cyp6w1, sand, CG8026, DopEcR, CG8745, Gbs-70E, rogdi, Indy, SLC22A, CG17734, sea, Nrx-1, wfs1, Ku80, phu, Gclm, Tdc2, SMC5, alpha-Man-Ia, Pka-R1, Tdc1, Vmat…	Biological_pathways	Up- and donw-regulated genes
GO:0090087	regulation of peptide transport	53	28	17.06	0.00143	FBgn0000017, FBgn0003371, FBgn0010379, FBgn0010391, FBgn0010660, FBgn0011726, FBgn0014396, FBgn0015589, FBgn0015790, FBgn0020497, FBgn0021761, FBgn0024921, FBgn0026207, FBgn0027575, FBgn0029939, FBgn0034140, FBgn0036448, FBgn0037015, FBgn0038065, FBgn0038947, FBgn0039770, FBgn0259824, FBgn0261873, FBgn0263260, FBgn0264493, FBgn0264574, FBgn0264607, FBgn0267002	Abl, sgg, Akt1, Gtp-bp, Nup214, tsr, tim, Apc, Rab11, emb, Nup154, Tnpo, mbo, GABA-B-R2, CG9650, Lst, mop, cmpy, Snx3, Sar1, CG15537, Hip14, sdt, sel, rdx, Glut1, CaMKII, unc-104	Biological_pathways	Up- and donw-regulated genes
GO:0098609	cell-cell adhesion	111	51	35.74	0.00159	FBgn0000163, FBgn0000180, FBgn0000547, FBgn0001075, FBgn0001083, FBgn0001257, FBgn0001987, FBgn0003255, FBgn0003731, FBgn0004449, FBgn0004636, FBgn0004647, FBgn0005775, FBgn0010473, FBgn0015609, FBgn0017590, FBgn0023095, FBgn0024189, FBgn0024836, FBgn0031866, FBgn0034972, FBgn0036448, FBgn0036844, FBgn0038084, FBgn0038087, FBgn0038494, FBgn0038498, FBgn0039089, FBgn0039294, FBgn0039584, FBgn00397…	baz, bib, ed, ft, fw, ImpL2, Gli, rk, Egfr, Ten-m, Rap1, N, Con, tutl, CadN, klg, caps, sns, stan, Nlg2, CG10339, mop, Mkp3, beat-Vc, beat-Va, beat-IIb, beat-IIa, beat-IV, Cad96Cb, beat-VI, Cad99C, POSH, Nlg1, Nlg3, Nlg4, beat-VII, rhea, par-1, Dscam3, kug, RanBPM, Sec23, Sec24CD, pyd, Src64B, scrib, sli, CG44153, Dscam2, Ten-a, chp	Biological_pathways	Up- and donw-regulated genes
GO:0042048	olfactory behavior	63	32	20.28	0.0016	FBgn0000273, FBgn0003371, FBgn0003731, FBgn0003861, FBgn0004244, FBgn0004516, FBgn0004575, FBgn0004622, FBgn0004638, FBgn0004907, FBgn0005672, FBgn0010399, FBgn0011582, FBgn0015269, FBgn0015380, FBgn0016926, FBgn0024248, FBgn0024944, FBgn0027109, FBgn0027575, FBgn0031515, FBgn0034470, FBgn0034475, FBgn0037140, FBgn0037408, FBgn0039678, FBgn0039685, FBgn0041188, FBgn0085434, FBgn0259243, FBgn02627…	Pka-C1, sgg, Egfr, trp, Rdl, Gad1, Syn, TkR99D, drk, 14-3-3zeta, spi, Nmdar1, Dop1R1, Nf1, drl, Pino, chico, Oamb, NPF, GABA-B-R2, CG9664, Obp56d, Obp56h, SLC22A, NPFR, Obp99a, Obp99b, Atx2, NaCP60E, Pka-R1, AGO1, scrib	Biological_pathways	Up- and donw-regulated genes
GO:0010883	regulation of lipid storage	37	21	11.91	0.00172	FBgn0001257, FBgn0003651, FBgn0004797, FBgn0008635, FBgn0010348, FBgn0010350, FBgn0010379, FBgn0025724, FBgn0025725, FBgn0028550, FBgn0028969, FBgn0028978, FBgn0029975, FBgn0036211, FBgn0036449, FBgn0036816, FBgn0036919, FBgn0038197, FBgn0039114, FBgn0264607, FBgn0267339	ImpL2, svp, mdy, betaCOP, Arf79F, Cds, Akt1, beta'COP, alphaCOP, Atf3, deltaCOP, trbl, spidey, CG5946, bmm, Indy, Grasp65, foxo, Lsd-1, CaMKII, p38c	Biological_pathways	Up- and donw-regulated genes
GO:0007189	adenylate cyclase-activating G protein-coupled receptor signaling pathway	28	17	9.02	0.00174	FBgn0003255, FBgn0004573, FBgn0004852, FBgn0011582, FBgn0016650, FBgn0022710, FBgn0023178, FBgn0023416, FBgn0024150, FBgn0032048, FBgn0033313, FBgn0035538, FBgn0038063, FBgn0039747, FBgn0053517, FBgn0250910, FBgn0260753	rk, 5-HT7, Ac76E, Dop1R1, Lgr1, Ac13E, Pdf, Ac3, Ac78C, Dh31, Cirl, DopEcR, Octbeta2R, AdoR, Dop2R, Octbeta3R, Pdfr	Biological_pathways	Up- and donw-regulated genes
GO:0007626	locomotory behavior	160	75	51.52	0.00192	FBgn0000173, FBgn0000500, FBgn0000721, FBgn0001128, FBgn0001297, FBgn0001308, FBgn0002525, FBgn0002917, FBgn0002921, FBgn0002940, FBgn0003068, FBgn0003371, FBgn0003380, FBgn0003423, FBgn0004516, FBgn0004611, FBgn0005536, FBgn0005558, FBgn0005626, FBgn0010473, FBgn0011205, FBgn0011581, FBgn0011802, FBgn0012344, FBgn0013759, FBgn0014396, FBgn0015269, FBgn0016076, FBgn0017561, FBgn0020618, FBgn00221…	ben, Dsk, for, Gpdh1, kay, Khc, Lam, na, Atpalpha, ninaE, per, sgg, Sh, slgA, Gad1, Plc21C, Mbs, ey, ple, tutl, fbl, Ms, Gem3, Dh44, CASK, tim, Nf1, vri, Ork1, Rack1, Gpo1, Clk, Pdf, amon, Ac3, cry, Eaat1, NPF, Cdk5alpha, slmo, Marf, Pink1, hiw, lid, Nlg2, Ttc19, Cirl, Dcr-2, twz, ITP, MsR1, Tk, foxo, kuk, Ktl, wfs1, Atx2, Ilp5, Ilp3, Tdc2, Trim9, Sk2, Mid1, shakB, brp, Pdfr, Cul3, cu, TfAP-2, Sh…	Biological_pathways	Up- and donw-regulated genes
GO:0042593	glucose homeostasis	33	19	10.63	0.00226	FBgn0000579, FBgn0001092, FBgn0001186, FBgn0001187, FBgn0003067, FBgn0003071, FBgn0003651, FBgn0004654, FBgn0005558, FBgn0015721, FBgn0020236, FBgn0024248, FBgn0028978, FBgn0029155, FBgn0032940, FBgn0034140, FBgn0038197, FBgn0086355, FBgn0264574	Eno, Gapdh2, Hex-A, Hex-C, Pepck1, Pfk, svp, Pgd, ey, ktub, ATPCL, chico, trbl, Men-b, Mondo, Lst, foxo, Tpi, Glut1	Biological_pathways	Up- and donw-regulated genes
GO:0019935	cyclic-nucleotide-mediated signaling	50	31	16.1	0.00229	FBgn0000273, FBgn0003116, FBgn0003255, FBgn0004573, FBgn0004852, FBgn0010197, FBgn0011582, FBgn0013973, FBgn0015269, FBgn0016650, FBgn0022710, FBgn0023178, FBgn0023416, FBgn0024150, FBgn0026575, FBgn0032048, FBgn0033313, FBgn0035092, FBgn0035538, FBgn0038063, FBgn0038435, FBgn0038436, FBgn0039722, FBgn0039747, FBgn0053517, FBgn0250910, FBgn0259145, FBgn0259243, FBgn0260753, FBgn0261988, FBgn02632…	Pka-C1, pn, rk, 5-HT7, Ac76E, Gyc32E, Dop1R1, Gycbeta100B, Nf1, Lgr1, Ac13E, Pdf, Ac3, Ac78C, hang, Dh31, Cirl, Nplp1, DopEcR, Octbeta2R, Gyc89Da, Gyc89Db, Capa, AdoR, Dop2R, Octbeta3R, CG42260, Pka-R1, Pdfr, Gprk2, Cngl	Biological_pathways	Up- and donw-regulated genes
GO:0046822	regulation of nucleocytoplasmic transport	22	14	7.08	0.00238	FBgn0000017, FBgn0000273, FBgn0002044, FBgn0002638, FBgn0003321, FBgn0003371, FBgn0010660, FBgn0014396, FBgn0020497, FBgn0021761, FBgn0024921, FBgn0026207, FBgn0039302, FBgn0264493	Abl, Pka-C1, swm, Rcc1, sbr, sgg, Nup214, tim, emb, Nup154, Tnpo, mbo, Nup358, rdx	Biological_pathways	Up- and donw-regulated genes
GO:0009069	serine family amino acid metabolic process	22	14	7.08	0.00238	FBgn0014427, FBgn0014455, FBgn0023129, FBgn0027945, FBgn0029823, FBgn0031148, FBgn0032287, FBgn0034276, FBgn0036762, FBgn0037684, FBgn0038074, FBgn0039094, FBgn0261270, FBgn0263864	CG11899, Ahcy, aay, ppl, Shmt, Cbs, CG6415, Sardh, CG7430, Srr, Gnmt, CG10184, SelD, Dark	Biological_pathways	Up- and donw-regulated genes
GO:0006641	triglyceride metabolic process	31	18	9.98	0.00259	FBgn0000370, FBgn0001128, FBgn0003067, FBgn0004797, FBgn0010350, FBgn0010379, FBgn0024248, FBgn0025592, FBgn0027579, FBgn0030607, FBgn0035266, FBgn0036449, FBgn0038197, FBgn0039114, FBgn0053120, FBgn0261560, FBgn0263593, FBgn0264494	crc, Gpdh1, Pepck1, mdy, Cds, Akt1, chico, Gk1, mino, dob, Gk2, bmm, foxo, Lsd-1, CG33120, Thor, Lpin, CG17646	Biological_pathways	Up- and donw-regulated genes
GO:0009084	glutamine family amino acid biosynthetic process	10	8	3.22	0.00264	FBgn0001124, FBgn0001125, FBgn0001145, FBgn0003423, FBgn0026565, FBgn0037146, FBgn0038516, FBgn0261625	Got1, Got2, Gs2, slgA, Ass, CG7470, P5cr-2, GLS	Biological_pathways	Up- and donw-regulated genes
GO:0006090	pyruvate metabolic process	27	20	8.69	0.00286	FBgn0000579, FBgn0001091, FBgn0001092, FBgn0001186, FBgn0001187, FBgn0002719, FBgn0003067, FBgn0003071, FBgn0004647, FBgn0012036, FBgn0014869, FBgn0027580, FBgn0028325, FBgn0029155, FBgn0038662, FBgn0038957, FBgn0039635, FBgn0051075, FBgn0086355, FBgn0250906	Eno, Gapdh1, Gapdh2, Hex-A, Hex-C, Men, Pepck1, Pfk, N, Aldh, Pglym78, PCB, Pdha, Men-b, Mpc1, CG7059, Pdhb, CG31075, Tpi, Pgk	Biological_pathways	Up- and donw-regulated genes
GO:0006614	SRP-dependent cotranslational protein targeting to membrane	12	9	3.86	0.00292	FBgn0010391, FBgn0010638, FBgn0010747, FBgn0015298, FBgn0025700, FBgn0035771, FBgn0035947, FBgn0038810, FBgn0086357	Gtp-bp, Sec61beta, Srp54k, Srp19, CG5885, Sec63, Srp68, Srp72, Sec61alpha	Biological_pathways	Up- and donw-regulated genes
GO:0006732	coenzyme metabolic process	111	55	35.74	0.00321	FBgn0000579, FBgn0001091, FBgn0001092, FBgn0001098, FBgn0001128, FBgn0001186, FBgn0001187, FBgn0001248, FBgn0002641, FBgn0003071, FBgn0003141, FBgn0003162, FBgn0003965, FBgn0004057, FBgn0004647, FBgn0004654, FBgn0005278, FBgn0010222, FBgn0010611, FBgn0011205, FBgn0012034, FBgn0014455, FBgn0014869, FBgn0020236, FBgn0020385, FBgn0022160, FBgn0023477, FBgn0028325, FBgn0029158, FBgn0029823, FBgn00303…	Eno, Gapdh1, Gapdh2, Gdh, Gpdh1, Hex-A, Hex-C, Idh, mal, Pfk, pr, Pu, v, Zw, N, Pgd, Sam-S, Nmdmc, Hmgs, fbl, AcCoAS, Ahcy, Pglym78, ATPCL, pug, Gpo1, Taldo, Pdha, Las, Shmt, regucalcin, Coq5, Naprt, Coq6, CG8665, CG8303, CG5065, Sardh, CG12016, CG7560, ND-39, ScsbetaA, CG8199, Gnmt, CG7059, Nmnat, Pdhb, CG7920, CG1774, Mthfs, Pdxk, Tpi, Pgk, Mocs1, Dark	Biological_pathways	Up- and donw-regulated genes
GO:0051606	detection of stimulus	78	37	25.11	0.00341	FBgn0000120, FBgn0002937, FBgn0002938, FBgn0002940, FBgn0003218, FBgn0003380, FBgn0003861, FBgn0004363, FBgn0004622, FBgn0004623, FBgn0004646, FBgn0010350, FBgn0013995, FBgn0014019, FBgn0015721, FBgn0024150, FBgn0025680, FBgn0031634, FBgn0032888, FBgn0033159, FBgn0034511, FBgn0036150, FBgn0036260, FBgn0036937, FBgn0037163, FBgn0037166, FBgn0037989, FBgn0038721, FBgn0040321, FBgn0085387, FBgn00867…	Arr1, ninaB, ninaC, ninaE, rdgB, Sh, trp, porin, TkR99D, Gbeta76C, ogre, Cds, Calx, Rh5, ktub, Ac78C, cry, Ir25a, CheB38c, Dscam1, GNBP-like3, Ir68a, Rh7, Ir76b, laza, CG11426, ATP8B, subdued, GNBP3, shakB, stops, stmA, stj, Piezo, Inx3, rdgC, Ggamma30A	Biological_pathways	Up- and donw-regulated genes
GO:1902600	proton transmembrane transport	40	25	12.88	0.00371	FBgn0002921, FBgn0005671, FBgn0010217, FBgn0011211, FBgn0014391, FBgn0016119, FBgn0016120, FBgn0016691, FBgn0019644, FBgn0020235, FBgn0022097, FBgn0027779, FBgn0028662, FBgn0028670, FBgn0028671, FBgn0035032, FBgn0037671, FBgn0038224, FBgn0039830, FBgn0040377, FBgn0259111, FBgn0259150, FBgn0262511, FBgn0262736, FBgn0263598	Atpalpha, Vha55, ATPsynbeta, blw, sun, ATPsynCF6, ATPsynD, ATPsynO, ATPsynB, ATPsyngamma, Vha36-1, VhaSFD, VhaPPA1-1, Vha100-2, Vha100-1, ATPsynF, ATP6AP2, ATPsynE, ATPsynC, Vha36-3, Ndae1, OtopLc, Vha44, Vha16-1, Vha68-2	Biological_pathways	Up- and donw-regulated genes
GO:0046716	muscle cell cellular homeostasis	25	15	8.05	0.00381	FBgn0004169, FBgn0004606, FBgn0004647, FBgn0010470, FBgn0015754, FBgn0020618, FBgn0031879, FBgn0034070, FBgn0039936, FBgn0250906, FBgn0260003, FBgn0261014, FBgn0261458, FBgn0265487, FBgn0266084	up, zfh1, N, Fkbp14, Lis-1, Rack1, uif, SP2353, Gyf, Pgk, Dys, TER94, capt, mbl, Fhos	Biological_pathways	Up- and donw-regulated genes
GO:0015698	inorganic anion transport	39	21	12.56	0.00409	FBgn0010497, FBgn0013953, FBgn0024315, FBgn0024963, FBgn0026409, FBgn0027610, FBgn0028879, FBgn0030529, FBgn0030890, FBgn0032689, FBgn0036240, FBgn0036279, FBgn0038354, FBgn0038721, FBgn0039789, FBgn0040238, FBgn0051547, FBgn0259111, FBgn0260795, FBgn0261444, FBgn0264908	dmGlut, Esp, Picot, GluClalpha, Mpcp2, Dic1, CG15270, Clic, CG7536, CG10413, CG6928, Ncc69, CG5404, subdued, CG9717, Best1, NKCC, Ndae1, NaPi-III, CG3638, pHCl-1	Biological_pathways	Up- and donw-regulated genes
GO:0046942	carboxylic acid transport	66	32	21.25	0.00412	FBgn0010497, FBgn0026439, FBgn0027610, FBgn0028425, FBgn0028646, FBgn0029762, FBgn0030013, FBgn0031069, FBgn0031424, FBgn0033095, FBgn0033391, FBgn0033657, FBgn0034063, FBgn0034381, FBgn0034999, FBgn0035969, FBgn0036007, FBgn0036116, FBgn0036279, FBgn0036816, FBgn0036984, FBgn0037714, FBgn0037715, FBgn0037912, FBgn0038641, FBgn0038662, FBgn0038975, FBgn0039915, FBgn0050503, FBgn0051547, FBgn02617…	dmGlut, Eaat1, Dic1, JhI-21, aralar1, NAAT1, GIIIspla2, Pmp70, VGlut, chk, CG8026, Sln, CG8389, List, Fatp3, CG4476, path, CG7888, Ncc69, Indy, CG13248, CG9396, CG9399, sea, CG7708, Mpc1, Nrx-1, Gat, CG30503, NKCC, kcc, Ih	Biological_pathways	Up- and donw-regulated genes
GO:0019752	carboxylic acid metabolic process	309	152	99.49	0.00421	FBgn0000153, FBgn0000565, FBgn0000579, FBgn0001091, FBgn0001092, FBgn0001098, FBgn0001124, FBgn0001125, FBgn0001145, FBgn0001186, FBgn0001187, FBgn0001208, FBgn0001248, FBgn0001258, FBgn0002719, FBgn0003067, FBgn0003071, FBgn0003162, FBgn0003189, FBgn0003423, FBgn0003965, FBgn0004516, FBgn0004647, FBgn0004654, FBgn0005626, FBgn0005674, FBgn0010222, FBgn0010497, FBgn0010803, FBgn0011361, FBgn00120…	b, Eip71CD, Eno, Gapdh1, Gapdh2, Gdh, Got1, Got2, Gs2, Hex-A, Hex-C, Hn, Idh, Ldh, Men, Pepck1, Pfk, Pu, r, slgA, v, Gad1, N, Pgd, ple, GluProRS, Nmdmc, dmGlut, TrpRS, ND-ACP, AcCoAS, Aldh, Odc1, CG11899, Ahcy, Pglym78, Faa, ATPCL, pug, Oat, aay, D2hgdh, arg, CG17896, Irp-1B, Thiolase, Ate1, Ass, ValRS, TyrRS, ThrRS, LysRS, LeuRS-m, IleRS, AlaRS, Idh3a, bgm, mino, PCB, ppl, Pdha, Mtpalpha, hll, M…	Biological_pathways	Up- and donw-regulated genes
GO:0071805	potassium ion transmembrane transport	37	20	11.91	0.00475	FBgn0000535, FBgn0002921, FBgn0003380, FBgn0005564, FBgn0011589, FBgn0015777, FBgn0017561, FBgn0029761, FBgn0032689, FBgn0032946, FBgn0033257, FBgn0033872, FBgn0036279, FBgn0037690, FBgn0038165, FBgn0040297, FBgn0051547, FBgn0260971, FBgn0262593, FBgn0263390	eag, Atpalpha, Sh, Shal, Elk, nrv2, Ork1, SK, CG10413, nrv3, sand, CG6329, Ncc69, Task7, Task6, Nhe2, NKCC, CG42594, Shab, Nha2	Biological_pathways	Up- and donw-regulated genes
GO:0007608	sensory perception of smell	54	27	17.39	0.00478	FBgn0000120, FBgn0000535, FBgn0003218, FBgn0003656, FBgn0004380, FBgn0004381, FBgn0004622, FBgn0011280, FBgn0011283, FBgn0031110, FBgn0031634, FBgn0033065, FBgn0033268, FBgn0034470, FBgn0034471, FBgn0034475, FBgn0034509, FBgn0036937, FBgn0037976, FBgn0037989, FBgn0039678, FBgn0039685, FBgn0042129, FBgn0043533, FBgn0046878, FBgn0051163, FBgn0261588	Arr1, eag, rdgB, sws, Klp64D, Klp68D, TkR99D, Obp19d, Obp28a, Obp19b, Ir25a, Cyp6w1, Obp44a, Obp56d, Obp56e, Obp56h, Obp57c, Ir76b, Tk, ATP8B, Obp99a, Obp99b, OS9, Obp56f, Obp83cd, SKIP, pdm3	Biological_pathways	Up- and donw-regulated genes
GO:0048878	chemical homeostasis	212	93	68.26	0.00514	FBgn0000500, FBgn0000579, FBgn0001092, FBgn0001186, FBgn0001187, FBgn0002868, FBgn0002921, FBgn0003067, FBgn0003071, FBgn0003651, FBgn0003861, FBgn0004169, FBgn0004580, FBgn0004611, FBgn0004654, FBgn0005558, FBgn0005671, FBgn0010379, FBgn0010387, FBgn0010399, FBgn0011204, FBgn0011205, FBgn0011582, FBgn0011603, FBgn0011672, FBgn0015222, FBgn0015622, FBgn0015664, FBgn0015721, FBgn0015777, FBgn00202…	Dsk, Eno, Gapdh2, Hex-A, Hex-C, MtnA, Atpalpha, Pepck1, Pfk, svp, trp, up, Cbp53E, Plc21C, Pgd, ey, Vha55, Akt1, Acbp2, Nmdar1, cue, fbl, Dop1R1, ine, Mvl, Fer1HCH, Cnx99A, Dref, ktub, nrv2, ATPCL, amon, chico, Oamb, Irp-1B, AkhR, Lk, hll, Atf3, Vha100-2, Vha100-1, Nckx30C, trbl, Men-b, dob, Shawn, Npc2a, CG9527, Mco1, CG10413, CG10470, Mondo, nrv3, CG1882, wash, Lst, Acox57D-d, Fatp3, ABCB7, CG8…	Biological_pathways	Up- and donw-regulated genes
GO:0048488	synaptic vesicle endocytosis	42	22	13.52	0.00517	FBgn0000414, FBgn0001987, FBgn0010300, FBgn0010348, FBgn0013759, FBgn0015790, FBgn0016975, FBgn0016976, FBgn0023388, FBgn0031866, FBgn0034691, FBgn0034972, FBgn0038659, FBgn0038816, FBgn0038975, FBgn0051146, FBgn0083963, FBgn0083975, FBgn0086676, FBgn0086784, FBgn0261041, FBgn0261279	Dab, Gli, brat, Arf79F, CASK, Rab11, stnB, stnA, Dap160, Nlg2, Synj, CG10339, EndoA, Lrrk, Nrx-1, Nlg1, Nlg3, Nlg4, spin, stmA, stj, lqfR	Biological_pathways	Up- and donw-regulated genes
GO:0051705	multi-organism behavior	19	12	6.12	0.00537	FBgn0002917, FBgn0004244, FBgn0024944, FBgn0027109, FBgn0031866, FBgn0033980, FBgn0034636, FBgn0037976, FBgn0038839, FBgn0053988, FBgn0261953, FBgn0263241	na, Rdl, Oamb, NPF, Nlg2, Cyp6a20, twz, Tk, Ktl, Mid1, TfAP-2, Mocs1	Biological_pathways	Up- and donw-regulated genes
GO:0070887	cellular response to chemical stimulus	341	132	109.79	0.00539	FBgn0000037, FBgn0000273, FBgn0000370, FBgn0000395, FBgn0000541, FBgn0000565, FBgn0000568, FBgn0001218, FBgn0001220, FBgn0001230, FBgn0001248, FBgn0001257, FBgn0001942, FBgn0002031, FBgn0003067, FBgn0003118, FBgn0003255, FBgn0003371, FBgn0003380, FBgn0003462, FBgn0003463, FBgn0003651, FBgn0003861, FBgn0004390, FBgn0004636, FBgn0004638, FBgn0010379, FBgn0010602, FBgn0011582, FBgn0011604, FBgn00123…	mAChR-A, Pka-C1, crc, cv-2, E(bx), Eip71CD, Eip75B, Hsc70-3, Hsc70-5, Hsp68, Idh, ImpL2, eIF4A, l(2)37Cc, Pepck1, pnt, rk, sgg, Sh, Sod1, sog, svp, trp, RasGAP1, Rap1, drk, Akt1, lwr, Dop1R1, Iswi, Dh44, Hsp70Ba, Crz, bnl, sty, Hr38, drl, Cnx99A, Lis-1, Tom40, Lgr1, sfl, Pdk1, emb, Xbp1, CG2918, chico, brk, Sirt1, Mekk1, Sec13, Cyp6g1, AkhR, Sik2, TyrRS, TotA, Syt4, trbl, Smurf, CHES-1-like, Shmt…	Biological_pathways	Up- and donw-regulated genes
GO:0009066	aspartate family amino acid metabolic process	28	16	9.02	0.00552	FBgn0001124, FBgn0001125, FBgn0014455, FBgn0025720, FBgn0030653, FBgn0032726, FBgn0032727, FBgn0034215, FBgn0034276, FBgn0036157, FBgn0036997, FBgn0037684, FBgn0038074, FBgn0039094, FBgn0261014, FBgn0263864	Got1, Got2, Ahcy, Ate1, CG7860, CG10621, CG10623, Mtap, Sardh, CG7560, CG5955, Srr, Gnmt, CG10184, TER94, Dark	Biological_pathways	Up- and donw-regulated genes
GO:0008049	male courtship behavior	35	19	11.27	0.00552	FBgn0000504, FBgn0003068, FBgn0003429, FBgn0004227, FBgn0004573, FBgn0004575, FBgn0004595, FBgn0005626, FBgn0013759, FBgn0019985, FBgn0024944, FBgn0027109, FBgn0030437, FBgn0031866, FBgn0034636, FBgn0038839, FBgn0039298, FBgn0261953, FBgn0264607	dsx, per, slo, nonA, 5-HT7, Syn, pros, ple, CASK, mGluR, Oamb, NPF, hec, Nlg2, twz, Ktl, to, TfAP-2, CaMKII	Biological_pathways	Up- and donw-regulated genes
GO:0006836	neurotransmitter transport	128	55	41.21	0.00639	FBgn0000241, FBgn0000346, FBgn0002121, FBgn0003515, FBgn0004574, FBgn0004575, FBgn0004636, FBgn0004868, FBgn0005586, FBgn0010015, FBgn0010348, FBgn0010414, FBgn0010497, FBgn0011288, FBgn0011603, FBgn0013759, FBgn0026428, FBgn0026439, FBgn0027575, FBgn0027660, FBgn0028400, FBgn0028646, FBgn0029663, FBgn0029762, FBgn0030897, FBgn0031424, FBgn0031935, FBgn0031937, FBgn0032895, FBgn0033313, FBgn00338…	bw, comt, l(2)gl, st, Rop, Syn, Rap1, Gdi, Rab3, CanA1, Arf79F, SerT, dmGlut, Snap25, ine, CASK, HDAC6, Eaat1, GABA-B-R2, blot, Syt4, aralar1, CG10804, NAAT1, Frq1, VGlut, CG13793, CG13795, twit, Cirl, Syngr, bdg, List, CG4476, Syx6, SLC22A, CG7708, veli, Gat, cpx, CG33296, Rim, stmA, alphaSnap, brp, Hip14, Dys, Vmat, Sytalpha, lqfR, Exn, Ih, Fife, Hsc70-4, Sec5	Biological_pathways	Up- and donw-regulated genes
GO:0015986	ATP synthesis coupled proton transport	15	10	4.83	0.00641	FBgn0010217, FBgn0011211, FBgn0014391, FBgn0016119, FBgn0016120, FBgn0016691, FBgn0019644, FBgn0020235, FBgn0038224, FBgn0039830	ATPsynbeta, blw, sun, ATPsynCF6, ATPsynD, ATPsynO, ATPsynB, ATPsyngamma, ATPsynE, ATPsynC	Biological_pathways	Up- and donw-regulated genes
GO:1903531	negative regulation of secretion by cell	13	9	4.19	0.00679	FBgn0004636, FBgn0010379, FBgn0027575, FBgn0029939, FBgn0034140, FBgn0037015, FBgn0039770, FBgn0041605, FBgn0264607	Rap1, Akt1, GABA-B-R2, CG9650, Lst, cmpy, CG15537, cpx, CaMKII	Biological_pathways	Up- and donw-regulated genes
GO:0009744	response to sucrose	13	9	4.19	0.00679	FBgn0000721, FBgn0003071, FBgn0011582, FBgn0015721, FBgn0024150, FBgn0032447, FBgn0032940, FBgn0035538, FBgn0266064	for, Pfk, Dop1R1, ktub, Ac78C, PICK1, Mondo, DopEcR, GlyS	Biological_pathways	Up- and donw-regulated genes
GO:0009152	purine ribonucleotide biosynthetic process	73	43	23.5	0.00693	FBgn0000052, FBgn0000053, FBgn0000150, FBgn0000579, FBgn0001091, FBgn0001092, FBgn0001186, FBgn0001187, FBgn0003071, FBgn0004647, FBgn0004852, FBgn0010217, FBgn0011205, FBgn0011211, FBgn0012034, FBgn0013973, FBgn0014391, FBgn0014869, FBgn0016119, FBgn0016120, FBgn0016691, FBgn0019644, FBgn0020235, FBgn0020236, FBgn0020389, FBgn0020513, FBgn0023416, FBgn0024150, FBgn0028325, FBgn0036337, FBgn00377…	Pfas, Gart, awd, Eno, Gapdh1, Gapdh2, Hex-A, Hex-C, Pfk, N, Ac76E, ATPsynbeta, fbl, blw, AcCoAS, Gycbeta100B, sun, Pglym78, ATPsynCF6, ATPsynD, ATPsynO, ATPsynB, ATPsyngamma, ATPCL, Papss, Paics, Ac3, Ac78C, Pdha, AdenoK, CG8199, ATPsynE, Gyc89Da, Gyc89Db, AdSL, CG7059, CG11089, Pdhb, ATPsynC, AMPdeam, CG33958, Tpi, Pgk	Biological_pathways	Up- and donw-regulated genes
GO:0099054	presynapse assembly	11	8	3.54	0.00693	FBgn0001987, FBgn0031866, FBgn0034972, FBgn0038975, FBgn0051146, FBgn0083963, FBgn0083975, FBgn0264606	Gli, Nlg2, CG10339, Nrx-1, Nlg1, Nlg3, Nlg4, Fife	Biological_pathways	Up- and donw-regulated genes
GO:0009648	photoperiodism	11	8	3.54	0.00693	FBgn0003068, FBgn0004611, FBgn0004618, FBgn0014019, FBgn0014396, FBgn0023178, FBgn0025680, FBgn0036260	per, Plc21C, gl, Rh5, tim, Pdf, cry, Rh7	Biological_pathways	Up- and donw-regulated genes
GO:0030537	larval behavior	38	20	12.24	0.00704	FBgn0000500, FBgn0000721, FBgn0001308, FBgn0003380, FBgn0003888, FBgn0004516, FBgn0010473, FBgn0013469, FBgn0023179, FBgn0026439, FBgn0026562, FBgn0027109, FBgn0028374, FBgn0029161, FBgn0031866, FBgn0032840, FBgn0037408, FBgn0262114, FBgn0262593, FBgn0267002	Dsk, for, Khc, Sh, betaTub60D, Gad1, tutl, klu, amon, Eaat1, SPARC, NPF, Hug, slmo, Nlg2, sNPF, NPFR, RanBPM, Shab, unc-104	Biological_pathways	Up- and donw-regulated genes
GO:1901607	alpha-amino acid biosynthetic process	34	22	10.95	0.00713	FBgn0001124, FBgn0001125, FBgn0001145, FBgn0001208, FBgn0003189, FBgn0003423, FBgn0014427, FBgn0023129, FBgn0026565, FBgn0029823, FBgn0030482, FBgn0031148, FBgn0032726, FBgn0032727, FBgn0034215, FBgn0036157, FBgn0037146, FBgn0038074, FBgn0038516, FBgn0039094, FBgn0261270, FBgn0261625	Got1, Got2, Gs2, Hn, r, slgA, CG11899, aay, Ass, Shmt, CG1673, Cbs, CG10621, CG10623, Mtap, CG7560, CG7470, Gnmt, P5cr-2, CG10184, SelD, GLS	Biological_pathways	Up- and donw-regulated genes
GO:0008039	synaptic target recognition	43	22	13.85	0.00741	FBgn0001987, FBgn0004449, FBgn0005775, FBgn0010114, FBgn0010473, FBgn0015774, FBgn0016797, FBgn0031213, FBgn0031381, FBgn0033791, FBgn0034718, FBgn0035236, FBgn0035539, FBgn0039528, FBgn0052373, FBgn0085407, FBgn0085414, FBgn0250871, FBgn0262473, FBgn0262509, FBgn0264089, FBgn0267001	Gli, Ten-m, Con, hig, tutl, NetB, fz2, galectin, Npc2a, Drl-2, wdp, CG12004, slow, dsd, CG32373, Pvf3, dpr12, pot, Tl, nrm, sli, Ten-a	Biological_pathways	Up- and donw-regulated genes
GO:0042737	drug catabolic process	43	22	13.85	0.00741	FBgn0000024, FBgn0000153, FBgn0000261, FBgn0001208, FBgn0002036, FBgn0003067, FBgn0016013, FBgn0019643, FBgn0027945, FBgn0032287, FBgn0033518, FBgn0035943, FBgn0036762, FBgn0037153, FBgn0037697, FBgn0038074, FBgn0038172, FBgn0038519, FBgn0038570, FBgn0040211, FBgn0040309, FBgn0050104	Ace, b, Cat, Hn, CG10561, Pepck1, Faa, AANAT1, ppl, CG6415, Prx2540-2, CG5653, CG7430, olf413, GstZ2, Gnmt, Adgf-D, Prx3, Prx5, hgo, Jafrac1, NT5E-2	Biological_pathways	Up- and donw-regulated genes
GO:0003012	muscle system process	31	17	9.98	0.00746	FBgn0000500, FBgn0002772, FBgn0003721, FBgn0004169, FBgn0011581, FBgn0026439, FBgn0027356, FBgn0027556, FBgn0029161, FBgn0030357, FBgn0033926, FBgn0035499, FBgn0037976, FBgn0063485, FBgn0260660, FBgn0265434, FBgn0266084	Dsk, Mlc1, Tm1, up, Ms, Eaat1, Amph, CG4928, slmo, Sclp, Arc1, Chd64, Tk, Lasp, Mp, zip, Fhos	Biological_pathways	Up- and donw-regulated genes
GO:0010259	multicellular organism aging	137	58	44.11	0.00756	FBgn0000261, FBgn0000565, FBgn0001225, FBgn0001230, FBgn0001247, FBgn0001257, FBgn0002719, FBgn0002921, FBgn0003068, FBgn0003118, FBgn0003462, FBgn0003731, FBgn0004647, FBgn0005278, FBgn0014391, FBgn0015269, FBgn0015805, FBgn0016076, FBgn0016120, FBgn0020653, FBgn0022764, FBgn0024248, FBgn0024291, FBgn0025352, FBgn0026439, FBgn0027111, FBgn0027491, FBgn0027779, FBgn0028479, FBgn0031148, FBgn00312…	Cat, Eip71CD, Hsp26, Hsp68, Ide, ImpL2, Men, Atpalpha, per, pnt, Sod1, Egfr, N, Sam-S, sun, Nf1, HDAC1, vri, ATPsynD, Trxr-1, Sin3A, chico, Sirt1, Thiolase, Eaat1, miple1, Cdk5alpha, VhaSFD, Mtpalpha, Cbs, Tspo, daw, Daxx, CG10383, sNPF, CG10916, Atg7, levy, Sesn, mthl2, Indy, Gnmt, foxo, Prx3, Prx5, SIFaR, Trx-2, POSH, Jafrac1, Naam, AGBE, Tpi, alph, alpha-Man-Ia, CG42663, Thor, magu, Ih	Biological_pathways	Up- and donw-regulated genes
GO:0007610	behavior	434	203	139.74	0.00781	FBgn0000017, FBgn0000108, FBgn0000153, FBgn0000173, FBgn0000273, FBgn0000500, FBgn0000504, FBgn0000535, FBgn0000536, FBgn0000592, FBgn0000721, FBgn0001128, FBgn0001208, FBgn0001233, FBgn0001247, FBgn0001297, FBgn0001308, FBgn0002525, FBgn0002917, FBgn0002921, FBgn0002940, FBgn0003068, FBgn0003093, FBgn0003371, FBgn0003380, FBgn0003423, FBgn0003429, FBgn0003731, FBgn0003861, FBgn0003888, FBgn00042…	Abl, Appl, b, ben, Pka-C1, Dsk, dsx, eag, eas, Est-6, for, Gpdh1, Hn, Hsp83, Ide, kay, Khc, Lam, na, Atpalpha, ninaE, per, Pkc98E, sgg, Sh, slgA, slo, Egfr, trp, betaTub60D, nonA, Rdl, Ptp10D, Gad1, 5-HT7, Syn, pros, Plc21C, TkR99D, drk, ogre, N, svr, 14-3-3zeta, Ggamma1, Mbs, ey, Shal, ple, spi, CanA1, Nmdar1, tutl, simj, cue, fbl, bol, Ms, Dop1R1, EbpIII, Gem3, AcCoAS, Dh44, Sap47, klu, CASK, C…	Biological_pathways	Up- and donw-regulated genes
GO:0008344	adult locomotory behavior	71	33	22.86	0.00809	FBgn0000173, FBgn0000500, FBgn0001128, FBgn0002525, FBgn0002917, FBgn0002921, FBgn0002940, FBgn0004611, FBgn0005558, FBgn0005626, FBgn0010473, FBgn0011581, FBgn0011802, FBgn0013759, FBgn0015269, FBgn0022160, FBgn0026439, FBgn0027491, FBgn0029870, FBgn0030600, FBgn0031866, FBgn0032744, FBgn0033313, FBgn0034636, FBgn0035331, FBgn0037976, FBgn0038476, FBgn0039003, FBgn0052484, FBgn0085387, FBgn02592…	ben, Dsk, Gpdh1, Lam, na, Atpalpha, ninaE, Plc21C, ey, ple, tutl, Ms, Gem3, CASK, Nf1, Gpo1, Eaat1, Cdk5alpha, Marf, hiw, Nlg2, Ttc19, Cirl, twz, MsR1, Tk, kuk, wfs1, Sk2, shakB, brp, TfAP-2, Galt	Biological_pathways	Up- and donw-regulated genes
GO:0062012	regulation of small molecule metabolic process	36	19	11.59	0.00821	FBgn0000568, FBgn0004647, FBgn0011769, FBgn0020618, FBgn0025741, FBgn0027550, FBgn0029891, FBgn0031263, FBgn0032840, FBgn0034950, FBgn0036428, FBgn0036927, FBgn0037248, FBgn0038074, FBgn0040529, FBgn0250906, FBgn0261283, FBgn0263593, FBgn0266064	Eip75B, N, Fdx1, Rack1, PlexA, CG6495, Pink1, Tspo, sNPF, Pask, Gbs-70E, Gabat, srl, Gnmt, COX7A, Pgk, SREBP, Lpin, GlyS	Biological_pathways	Up- and donw-regulated genes
GO:0007267	cell-cell signaling	400	157	128.79	0.00831	FBgn0000017, FBgn0000024, FBgn0000036, FBgn0000037, FBgn0000180, FBgn0000261, FBgn0000273, FBgn0000346, FBgn0000711, FBgn0001134, FBgn0001319, FBgn0001987, FBgn0002121, FBgn0002643, FBgn0002921, FBgn0003134, FBgn0003371, FBgn0003380, FBgn0003415, FBgn0003429, FBgn0003462, FBgn0003499, FBgn0003651, FBgn0004244, FBgn0004380, FBgn0004449, FBgn0004573, FBgn0004574, FBgn0004575, FBgn0004580, FBgn00046…	Abl, Ace, nAChRalpha1, mAChR-A, bib, Cat, Pka-C1, comt, flw, Grd, kn, Gli, l(2)gl, mam, Atpalpha, Pp1alpha-96A, sgg, Sh, skd, slo, Sod1, sr, svp, Rdl, Klp64D, Ten-m, 5-HT7, Rop, Syn, Cbp53E, Plc21C, TkR99D, Rap1, N, Gdi, tws, Shal, Rab3, CanA1, Arf79F, Akt1, Nmdar1, Snap25, Ssdp, Dop1R1, Sap47, CASK, Gycbeta100B, drl, nAChRalpha3, Apc, Ipp, fz2, stnB, spen, mGluR, sfl, crol, CtBP, Sin3A, chico, O…	Biological_pathways	Up- and donw-regulated genes
GO:0042753	positive regulation of circadian rhythm	22	13	7.08	0.00835	FBgn0003380, FBgn0011204, FBgn0023178, FBgn0024944, FBgn0027348, FBgn0028519, FBgn0029891, FBgn0032048, FBgn0053527, FBgn0260794, FBgn0262593, FBgn0263397, FBgn0266418	Sh, cue, Pdf, Oamb, bgm, hll, Pink1, Dh31, SIFa, ctrip, Shab, Ih, wake	Biological_pathways	Up- and donw-regulated genes
GO:0048520	positive regulation of behavior	29	16	9.34	0.00868	FBgn0003380, FBgn0011204, FBgn0023178, FBgn0024291, FBgn0024944, FBgn0027348, FBgn0028519, FBgn0029891, FBgn0032048, FBgn0038197, FBgn0053527, FBgn0259243, FBgn0262593, FBgn0263397, FBgn0265784, FBgn0266418	Sh, cue, Pdf, Sirt1, Oamb, bgm, hll, Pink1, Dh31, foxo, SIFa, Pka-R1, Shab, Ih, CrebB, wake	Biological_pathways	Up- and donw-regulated genes
GO:0042026	protein refolding	20	12	6.44	0.00952	FBgn0001218, FBgn0001220, FBgn0001224, FBgn0001225, FBgn0001230, FBgn0004432, FBgn0011296, FBgn0013278, FBgn0015245, FBgn0034753, FBgn0039347, FBgn0266599	Hsc70-3, Hsc70-5, Hsp23, Hsp26, Hsp68, Cyp1, l(2)efl, Hsp70Ba, Hsp60A, CG2852, CG5071, Hsc70-4	Biological_pathways	Up- and donw-regulated genes
GO:0048167	regulation of synaptic plasticity	34	18	10.95	0.0096	FBgn0000261, FBgn0000346, FBgn0003462, FBgn0004580, FBgn0005586, FBgn0010379, FBgn0011288, FBgn0013334, FBgn0024248, FBgn0026080, FBgn0028400, FBgn0033926, FBgn0040752, FBgn0053547, FBgn0259246, FBgn0260003, FBgn0262733, FBgn0264606	Cat, comt, Sod1, Cbp53E, Rab3, Akt1, Snap25, Sap47, chico, Tip60, Syt4, Arc1, Prosap, Rim, brp, Dys, Src64B, Fife	Biological_pathways	Up- and donw-regulated genes
GO:0003008	system process	412	194	132.65	0.00963	FBgn0000017, FBgn0000036, FBgn0000108, FBgn0000120, FBgn0000241, FBgn0000273, FBgn0000299, FBgn0000500, FBgn0000535, FBgn0000536, FBgn0000721, FBgn0001134, FBgn0001208, FBgn0002772, FBgn0002917, FBgn0002921, FBgn0002940, FBgn0003068, FBgn0003093, FBgn0003218, FBgn0003371, FBgn0003380, FBgn0003656, FBgn0003721, FBgn0003731, FBgn0003861, FBgn0004169, FBgn0004198, FBgn0004227, FBgn0004244, FBgn00043…	Abl, nAChRalpha1, Appl, Arr1, bw, Pka-C1, Col4a1, Dsk, eag, eas, for, Grd, Hn, Mlc1, na, Atpalpha, ninaE, per, Pkc98E, rdgB, sgg, Sh, sws, Tm1, Egfr, trp, up, ct, nonA, Rdl, Ptp10D, Klp64D, Klp68D, Mdr49, Gad1, Syn, pros, gl, TkR99D, drk, N, svr, 14-3-3zeta, Ggamma1, Shal, Crys, spi, CanA1, Nmdar1, simj, Obp19d, Obp84a, Obp28a, Ms, Dop1R1, ine, Mvl, Sap47, CASK, Crz, Dhc93AB, Calx, Rh5, tim, Nf1,…	Biological_pathways	Up- and donw-regulated genes
GO:0002791	regulation of peptide secretion	27	15	8.69	0.01009	FBgn0010379, FBgn0010391, FBgn0011726, FBgn0027575, FBgn0029939, FBgn0034140, FBgn0036448, FBgn0037015, FBgn0038065, FBgn0039770, FBgn0259824, FBgn0263260, FBgn0264574, FBgn0264607, FBgn0267002	Akt1, Gtp-bp, tsr, GABA-B-R2, CG9650, Lst, mop, cmpy, Snx3, CG15537, Hip14, sel, Glut1, CaMKII, unc-104	Biological_pathways	Up- and donw-regulated genes
GO:0007631	feeding behavior	39	20	12.56	0.01014	FBgn0000500, FBgn0000721, FBgn0013469, FBgn0024291, FBgn0026562, FBgn0027109, FBgn0028374, FBgn0028418, FBgn0030795, FBgn0032840, FBgn0034636, FBgn0036713, FBgn0037408, FBgn0038197, FBgn0039298, FBgn0050361, FBgn0259243, FBgn0261953, FBgn0262114, FBgn0265784	Dsk, for, klu, Sirt1, SPARC, NPF, Hug, Lk, ppk28, sNPF, twz, Mip, NPFR, foxo, to, mtt, Pka-R1, TfAP-2, RanBPM, CrebB	Biological_pathways	Up- and donw-regulated genes
GO:0010817	regulation of hormone levels	54	26	17.39	0.01031	FBgn0000024, FBgn0000568, FBgn0000592, FBgn0003388, FBgn0010053, FBgn0010379, FBgn0011693, FBgn0011769, FBgn0023179, FBgn0027575, FBgn0029870, FBgn0029939, FBgn0030588, FBgn0030589, FBgn0030593, FBgn0031381, FBgn0032336, FBgn0034140, FBgn0034475, FBgn0036713, FBgn0037140, FBgn0038197, FBgn0038641, FBgn0039770, FBgn0264574, FBgn0267002	Ace, Eip75B, Est-6, shd, Jheh1, Akt1, Pdh, Fdx1, amon, GABA-B-R2, Marf, CG9650, CG9521, CG9519, CG9512, Npc2a, AstC, Lst, Obp56h, Mip, SLC22A, foxo, CG7708, CG15537, Glut1, unc-104	Biological_pathways	Up- and donw-regulated genes
GO:0055086	nucleobase-containing small molecule metabolic process	266	120	85.65	0.01064	FBgn0000052, FBgn0000053, FBgn0000150, FBgn0000153, FBgn0000579, FBgn0001091, FBgn0001092, FBgn0001098, FBgn0001128, FBgn0001186, FBgn0001187, FBgn0001248, FBgn0001989, FBgn0002641, FBgn0003071, FBgn0003189, FBgn0003257, FBgn0003965, FBgn0004057, FBgn0004647, FBgn0004654, FBgn0004852, FBgn0005671, FBgn0010197, FBgn0010217, FBgn0010350, FBgn0010611, FBgn0011205, FBgn0011211, FBgn0011361, FBgn00115…	Pfas, Gart, awd, b, Eno, Gapdh1, Gapdh2, Gdh, Gpdh1, Hex-A, Hex-C, Idh, ND-B17, mal, Pfk, r, r-l, v, Zw, N, Pgd, Ac76E, Vha55, Gyc32E, ATPsynbeta, Cds, Hmgs, fbl, blw, ND-ACP, e(r), AcCoAS, Gycbeta100B, sun, Ahcy, Pglym78, cype, ATPsynCF6, ATPsynD, ATPsynO, COX5A, ATPsynB, ATPsyngamma, ATPCL, pug, Papss, Paics, l(2)k01209, Gpo1, dnk, Ac13E, Ac3, Taldo, CG17896, Ac78C, PlexA, Ugt35B1, Ugt35A1, Pdh…	Biological_pathways	Up- and donw-regulated genes
GO:0034333	adherens junction assembly	18	11	5.8	0.01082	FBgn0000163, FBgn0004167, FBgn0004636, FBgn0010215, FBgn0024189, FBgn0026192, FBgn0027509, FBgn0027598, FBgn0261873, FBgn0262614, FBgn0263289	baz, kst, Rap1, alpha-Cat, sns, par-6, TBCD, cindr, sdt, pyd, scrib	Biological_pathways	Up- and donw-regulated genes
GO:0009649	entrainment of circadian clock	18	11	5.8	0.01082	FBgn0003068, FBgn0003371, FBgn0004611, FBgn0004618, FBgn0014019, FBgn0014396, FBgn0023076, FBgn0023178, FBgn0025680, FBgn0031634, FBgn0036260	per, sgg, Plc21C, gl, Rh5, tim, Clk, Pdf, cry, Ir25a, Rh7	Biological_pathways	Up- and donw-regulated genes
GO:0009991	response to extracellular stimulus	131	55	42.18	0.01109	FBgn0000370, FBgn0000721, FBgn0001230, FBgn0001247, FBgn0001257, FBgn0003067, FBgn0003380, FBgn0003459, FBgn0004852, FBgn0004921, FBgn0011582, FBgn0015799, FBgn0020618, FBgn0023169, FBgn0024248, FBgn0024944, FBgn0025595, FBgn0025625, FBgn0026597, FBgn0027109, FBgn0028479, FBgn0029975, FBgn0030890, FBgn0031006, FBgn0032840, FBgn0033528, FBgn0033926, FBgn0034140, FBgn0034366, FBgn0034897, FBgn00355…	crc, for, Hsp68, Ide, ImpL2, Pepck1, Sh, stwl, Ac76E, Ggamma1, Dop1R1, Rbf, Rack1, AMPKalpha, chico, Oamb, AkhR, Sik2, Axn, NPF, Mtpalpha, spidey, CG7536, rictor, sNPF, trsn, Arc1, Lst, Atg7, Sesn, DopEcR, mthl2, Atg17, Gnmt, foxo, EndoA, Lrrk, Dcr-1, REPTOR, to, Jafrac1, Ilp6, spin, Thor, whd, Ih, Lpin, Dark, Slob, SNF4Agamma, CaMKII, Ric, rudhira, GlyS, Bruce	Biological_pathways	Up- and donw-regulated genes
GO:0009266	response to temperature stimulus	104	45	33.49	0.01112	FBgn0000273, FBgn0001218, FBgn0001220, FBgn0001222, FBgn0001224, FBgn0001225, FBgn0001227, FBgn0001230, FBgn0001233, FBgn0002921, FBgn0002940, FBgn0003068, FBgn0004575, FBgn0004907, FBgn0005626, FBgn0010350, FBgn0010812, FBgn0011296, FBgn0011582, FBgn0013278, FBgn0014019, FBgn0015245, FBgn0015269, FBgn0015714, FBgn0023076, FBgn0024329, FBgn0024509, FBgn0026575, FBgn0028396, FBgn0031414, FBgn00316…	Pka-C1, Hsc70-3, Hsc70-5, Hsf, Hsp23, Hsp26, Hsp67Ba, Hsp68, Hsp83, Atpalpha, ninaE, per, Syn, 14-3-3zeta, ple, Cds, unc-45, l(2)efl, Dop1R1, Hsp70Ba, Rh5, Hsp60A, Nf1, Cyp6a17, Clk, Mekk1, Sec13, hang, TotA, eys, Ir25a, Dh31, laza, Hpr1, smp-30, subdued, Nup98-96, Gp93, TotC, stj, Ptpmeg, Ric, CrebB, rdgC, Hsc70-4	Biological_pathways	Up- and donw-regulated genes
GO:0019098	reproductive behavior	87	44	28.01	0.01148	FBgn0000504, FBgn0000535, FBgn0000592, FBgn0001247, FBgn0003068, FBgn0003380, FBgn0003429, FBgn0004227, FBgn0004573, FBgn0004575, FBgn0004595, FBgn0005626, FBgn0011206, FBgn0011695, FBgn0013759, FBgn0013953, FBgn0014396, FBgn0019985, FBgn0020618, FBgn0023178, FBgn0024944, FBgn0027109, FBgn0029709, FBgn0030437, FBgn0031866, FBgn0033153, FBgn0034475, FBgn0034636, FBgn0034638, FBgn0038839, FBgn00388…	dsx, eag, Est-6, Ide, per, Sh, slo, nonA, 5-HT7, Syn, pros, ple, bol, EbpIII, CASK, Esp, tim, mGluR, Rack1, Pdf, Oamb, NPF, CHOp24, hec, Nlg2, Gadd45, Obp56h, twz, CG10433, Ktl, SIFaR, to, Ilp5, Ilp3, bai, Tdc2, Sk2, SIFa, loj, spin, TfAP-2, CaMKII, Pde1c, mbl	Biological_pathways	Up- and donw-regulated genes
GO:0008340	determination of adult lifespan	134	56	43.14	0.01163	FBgn0000261, FBgn0000565, FBgn0001225, FBgn0001230, FBgn0001247, FBgn0001257, FBgn0002719, FBgn0002921, FBgn0003068, FBgn0003118, FBgn0003462, FBgn0003731, FBgn0004647, FBgn0005278, FBgn0014391, FBgn0015269, FBgn0015805, FBgn0016120, FBgn0020653, FBgn0022764, FBgn0024248, FBgn0024291, FBgn0025352, FBgn0026439, FBgn0027111, FBgn0027491, FBgn0027779, FBgn0028479, FBgn0031148, FBgn0031263, FBgn00314…	Cat, Eip71CD, Hsp26, Hsp68, Ide, ImpL2, Men, Atpalpha, per, pnt, Sod1, Egfr, N, Sam-S, sun, Nf1, HDAC1, ATPsynD, Trxr-1, Sin3A, chico, Sirt1, Thiolase, Eaat1, miple1, Cdk5alpha, VhaSFD, Mtpalpha, Cbs, Tspo, daw, Daxx, CG10383, sNPF, CG10916, Atg7, levy, mthl2, Indy, Gnmt, foxo, Prx3, Prx5, SIFaR, Trx-2, POSH, Jafrac1, Naam, AGBE, Tpi, alph, alpha-Man-Ia, CG42663, Thor, magu, Ih	Biological_pathways	Up- and donw-regulated genes
GO:0042558	pteridine-containing compound metabolic process	16	10	5.15	0.0122	FBgn0003116, FBgn0003141, FBgn0003162, FBgn0010222, FBgn0020385, FBgn0029823, FBgn0032945, FBgn0036157, FBgn0085453, FBgn0086348	pn, pr, Pu, Nmdmc, pug, Shmt, CG8665, CG7560, Mthfs, se	Biological_pathways	Up- and donw-regulated genes
GO:0051223	regulation of protein transport	47	23	15.13	0.0122	FBgn0000017, FBgn0003371, FBgn0010391, FBgn0010660, FBgn0011726, FBgn0014396, FBgn0015589, FBgn0015790, FBgn0020497, FBgn0021761, FBgn0024921, FBgn0026207, FBgn0027575, FBgn0036448, FBgn0037015, FBgn0038065, FBgn0038947, FBgn0259824, FBgn0261873, FBgn0263260, FBgn0264493, FBgn0264607, FBgn0267002	Abl, sgg, Gtp-bp, Nup214, tsr, tim, Apc, Rab11, emb, Nup154, Tnpo, mbo, GABA-B-R2, mop, cmpy, Snx3, Sar1, Hip14, sdt, sel, rdx, CaMKII, unc-104	Biological_pathways	Up- and donw-regulated genes
GO:1901701	cellular response to oxygen-containing compound	129	54	41.54	0.01258	FBgn0000037, FBgn0000273, FBgn0000541, FBgn0001257, FBgn0003067, FBgn0003371, FBgn0003380, FBgn0003462, FBgn0003651, FBgn0004636, FBgn0010379, FBgn0011582, FBgn0011604, FBgn0013767, FBgn0014859, FBgn0020386, FBgn0024248, FBgn0024291, FBgn0024509, FBgn0025625, FBgn0028978, FBgn0029823, FBgn0030795, FBgn0031006, FBgn0031971, FBgn0032447, FBgn0033257, FBgn0033631, FBgn0033935, FBgn0034140, FBgn00348…	mAChR-A, Pka-C1, E(bx), ImpL2, Pepck1, sgg, Sh, Sod1, svp, Rap1, Akt1, Dop1R1, Iswi, Crz, Hr38, Pdk1, chico, Sirt1, Sec13, Sik2, trbl, Shmt, ppk28, rictor, Sirup, PICK1, sand, Sod3, Sin1, Lst, Sesn, DopEcR, DOR, Oatp74D, Ir76b, srl, foxo, wfs1, Nup98-96, Jafrac1, wrd, Ilp6, Ilp5, Ilp3, Pdxk, Thor, Tl, Lpin, Lpt, Lst8, GlyS, Pde8, sima, Ggamma30A	Biological_pathways	Up- and donw-regulated genes
GO:0104004	cellular response to environmental stimulus	65	30	20.93	0.01265	FBgn0000120, FBgn0002887, FBgn0002937, FBgn0002938, FBgn0002940, FBgn0003218, FBgn0003861, FBgn0004623, FBgn0010350, FBgn0011205, FBgn0011774, FBgn0014019, FBgn0014073, FBgn0014396, FBgn0015721, FBgn0024329, FBgn0025680, FBgn0027575, FBgn0028396, FBgn0030795, FBgn0036260, FBgn0039915, FBgn0041627, FBgn0044812, FBgn0086704, FBgn0261794, FBgn0263397, FBgn0264953, FBgn0265434, FBgn0265959	Arr1, mus201, ninaB, ninaC, ninaE, rdgB, trp, Gbeta76C, Cds, fbl, Irbp, Rh5, Tie, tim, ktub, Mekk1, cry, GABA-B-R2, TotA, ppk28, Rh7, Gat, Ku80, TotC, stops, kcc, Ih, Piezo, zip, rdgC	Biological_pathways	Up- and donw-regulated genes
GO:0071214	cellular response to abiotic stimulus	65	30	20.93	0.01265	FBgn0000120, FBgn0002887, FBgn0002937, FBgn0002938, FBgn0002940, FBgn0003218, FBgn0003861, FBgn0004623, FBgn0010350, FBgn0011205, FBgn0011774, FBgn0014019, FBgn0014073, FBgn0014396, FBgn0015721, FBgn0024329, FBgn0025680, FBgn0027575, FBgn0028396, FBgn0030795, FBgn0036260, FBgn0039915, FBgn0041627, FBgn0044812, FBgn0086704, FBgn0261794, FBgn0263397, FBgn0264953, FBgn0265434, FBgn0265959	Arr1, mus201, ninaB, ninaC, ninaE, rdgB, trp, Gbeta76C, Cds, fbl, Irbp, Rh5, Tie, tim, ktub, Mekk1, cry, GABA-B-R2, TotA, ppk28, Rh7, Gat, Ku80, TotC, stops, kcc, Ih, Piezo, zip, rdgC	Biological_pathways	Up- and donw-regulated genes
GO:0007606	sensory perception of chemical stimulus	94	47	30.27	0.01354	FBgn0000120, FBgn0000535, FBgn0003218, FBgn0003380, FBgn0003656, FBgn0004380, FBgn0004381, FBgn0004595, FBgn0004622, FBgn0011280, FBgn0011282, FBgn0011283, FBgn0011672, FBgn0024150, FBgn0029948, FBgn0030723, FBgn0031110, FBgn0031634, FBgn0032888, FBgn0033065, FBgn0033268, FBgn0034470, FBgn0034471, FBgn0034475, FBgn0034509, FBgn0036783, FBgn0036937, FBgn0037295, FBgn0037908, FBgn0037976, FBgn00379…	Arr1, eag, rdgB, Sh, sws, Klp64D, Klp68D, pros, TkR99D, Obp19d, Obp84a, Obp28a, Mvl, Ac78C, CheA7a, dpr18, Obp19b, Ir25a, CheB38c, Cyp6w1, Obp44a, Obp56d, Obp56e, Obp56h, Obp57c, CheA75a, Ir76b, dpr16, dpr5, Tk, ATP8B, Obp99a, Obp99b, dpr6, OS9, Obp56f, Obp83cd, Obp49a, SKIP, dpr8, dpr11, dpr7, dpr4, dpr12, pdm3, dpr2, Ggamma30A	Biological_pathways	Up- and donw-regulated genes
GO:0009636	response to toxic substance	124	52	39.93	0.01361	FBgn0000036, FBgn0000261, FBgn0000273, FBgn0003093, FBgn0003462, FBgn0003731, FBgn0004512, FBgn0004575, FBgn0005626, FBgn0005672, FBgn0010399, FBgn0012034, FBgn0012036, FBgn0013278, FBgn0013759, FBgn0013767, FBgn0013949, FBgn0015222, FBgn0017590, FBgn0023129, FBgn0024291, FBgn0025454, FBgn0026575, FBgn0026718, FBgn0029823, FBgn0031453, FBgn0032456, FBgn0033065, FBgn0033212, FBgn0033631, FBgn00355…	nAChRalpha1, Cat, Pka-C1, Pkc98E, Sod1, Egfr, Mdr49, Syn, ple, spi, Nmdar1, AcCoAS, Aldh, Hsp70Ba, CASK, Crz, Elal, Fer1HCH, klg, aay, Sirt1, Cyp6g1, hang, Agpat2, Shmt, Bacc, MRP, Cyp6w1, LRR, Sod3, DopEcR, CG10226, CG8745, Gbs-70E, rogdi, CG17734, Zip89B, Irc, Cyp12a4, wfs1, Sid, Zip99C, Jafrac1, Ku80, phu, Gclm, mtt, alph, Pka-R1, Tdc1, Vmat, Pde8	Biological_pathways	Up- and donw-regulated genes
GO:0015718	monocarboxylic acid transport	23	13	7.41	0.01361	FBgn0030013, FBgn0031069, FBgn0033095, FBgn0033657, FBgn0034063, FBgn0034999, FBgn0036816, FBgn0037714, FBgn0037715, FBgn0038662, FBgn0038975, FBgn0039915, FBgn0050503	GIIIspla2, Pmp70, chk, Sln, CG8389, Fatp3, Indy, CG9396, CG9399, Mpc1, Nrx-1, Gat, CG30503	Biological_pathways	Up- and donw-regulated genes
GO:0019226	transmission of nerve impulse	14	9	4.51	0.01361	FBgn0001134, FBgn0011603, FBgn0029891, FBgn0031634, FBgn0036937, FBgn0064123, FBgn0085434, FBgn0262870, FBgn0264386	Grd, ine, Pink1, Ir25a, Ir76b, stg1, NaCP60E, axo, Ca-alpha1T	Biological_pathways	Up- and donw-regulated genes
GO:0035637	multicellular organismal signaling	14	9	4.51	0.01361	FBgn0001134, FBgn0011603, FBgn0029891, FBgn0031634, FBgn0036937, FBgn0064123, FBgn0085434, FBgn0262870, FBgn0264386	Grd, ine, Pink1, Ir25a, Ir76b, stg1, NaCP60E, axo, Ca-alpha1T	Biological_pathways	Up- and donw-regulated genes
GO:0099177	regulation of trans-synaptic signaling	110	52	35.42	0.01372	FBgn0000261, FBgn0000273, FBgn0000346, FBgn0001987, FBgn0003380, FBgn0003429, FBgn0003462, FBgn0004244, FBgn0004580, FBgn0004611, FBgn0004622, FBgn0004636, FBgn0005586, FBgn0010379, FBgn0011288, FBgn0013334, FBgn0013759, FBgn0013973, FBgn0019985, FBgn0024248, FBgn0026080, FBgn0026439, FBgn0027575, FBgn0028400, FBgn0030897, FBgn0030941, FBgn0031424, FBgn0031866, FBgn0032895, FBgn0033872, FBgn00339…	Cat, Pka-C1, comt, Gli, Sh, slo, Sod1, Rdl, Cbp53E, Plc21C, TkR99D, Rap1, Rab3, Akt1, Snap25, Sap47, CASK, Gycbeta100B, mGluR, chico, Tip60, Eaat1, GABA-B-R2, Syt4, Frq1, wgn, VGlut, Nlg2, twit, CG6329, Arc1, CG10339, SLC22A, KaiR1D, Nrx-1, Prosap, cpx, Nlg1, Rim, stg1, Nlg3, Nlg4, jeb, alpha-Spec, brp, Dys, Exn, Shab, Src64B, Ih, Slob, Fife	Biological_pathways	Up- and donw-regulated genes
GO:0050804	modulation of chemical synaptic transmission	110	52	35.42	0.01372	FBgn0000261, FBgn0000273, FBgn0000346, FBgn0001987, FBgn0003380, FBgn0003429, FBgn0003462, FBgn0004244, FBgn0004580, FBgn0004611, FBgn0004622, FBgn0004636, FBgn0005586, FBgn0010379, FBgn0011288, FBgn0013334, FBgn0013759, FBgn0013973, FBgn0019985, FBgn0024248, FBgn0026080, FBgn0026439, FBgn0027575, FBgn0028400, FBgn0030897, FBgn0030941, FBgn0031424, FBgn0031866, FBgn0032895, FBgn0033872, FBgn00339…	Cat, Pka-C1, comt, Gli, Sh, slo, Sod1, Rdl, Cbp53E, Plc21C, TkR99D, Rap1, Rab3, Akt1, Snap25, Sap47, CASK, Gycbeta100B, mGluR, chico, Tip60, Eaat1, GABA-B-R2, Syt4, Frq1, wgn, VGlut, Nlg2, twit, CG6329, Arc1, CG10339, SLC22A, KaiR1D, Nrx-1, Prosap, cpx, Nlg1, Rim, stg1, Nlg3, Nlg4, jeb, alpha-Spec, brp, Dys, Exn, Shab, Src64B, Ih, Slob, Fife	Biological_pathways	Up- and donw-regulated genes
GO:0070201	regulation of establishment of protein localization	50	24	16.1	0.01406	FBgn0000017, FBgn0000181, FBgn0003371, FBgn0010391, FBgn0010660, FBgn0011726, FBgn0014396, FBgn0015589, FBgn0015790, FBgn0020497, FBgn0021761, FBgn0024921, FBgn0026207, FBgn0027575, FBgn0036448, FBgn0037015, FBgn0038065, FBgn0038947, FBgn0259824, FBgn0261873, FBgn0263260, FBgn0264493, FBgn0264607, FBgn0267002	Abl, bic, sgg, Gtp-bp, Nup214, tsr, tim, Apc, Rab11, emb, Nup154, Tnpo, mbo, GABA-B-R2, mop, cmpy, Snx3, Sar1, Hip14, sdt, sel, rdx, CaMKII, unc-104	Biological_pathways	Up- and donw-regulated genes
GO:0008355	olfactory learning	40	20	12.88	0.01425	FBgn0000273, FBgn0003371, FBgn0003731, FBgn0003861, FBgn0004244, FBgn0004516, FBgn0004575, FBgn0004638, FBgn0004907, FBgn0005672, FBgn0010399, FBgn0011582, FBgn0015269, FBgn0015380, FBgn0024248, FBgn0024944, FBgn0037140, FBgn0041188, FBgn0259243, FBgn0262739	Pka-C1, sgg, Egfr, trp, Rdl, Gad1, Syn, drk, 14-3-3zeta, spi, Nmdar1, Dop1R1, Nf1, drl, chico, Oamb, SLC22A, Atx2, Pka-R1, AGO1	Biological_pathways	Up- and donw-regulated genes
GO:0098656	anion transmembrane transport	63	29	20.28	0.01469	FBgn0004363, FBgn0024315, FBgn0024963, FBgn0026409, FBgn0026439, FBgn0027610, FBgn0028425, FBgn0028646, FBgn0029762, FBgn0031424, FBgn0032456, FBgn0032689, FBgn0034381, FBgn0035969, FBgn0036007, FBgn0036116, FBgn0036279, FBgn0036984, FBgn0037714, FBgn0037715, FBgn0037852, FBgn0037912, FBgn0038641, FBgn0038662, FBgn0051547, FBgn0259111, FBgn0260795, FBgn0261794, FBgn0264908	porin, Picot, GluClalpha, Mpcp2, Eaat1, Dic1, JhI-21, aralar1, NAAT1, VGlut, MRP, CG10413, List, CG4476, path, CG7888, Ncc69, CG13248, CG9396, CG9399, Tpc1, sea, CG7708, Mpc1, NKCC, Ndae1, NaPi-III, kcc, pHCl-1	Biological_pathways	Up- and donw-regulated genes
GO:0031667	response to nutrient levels	130	54	41.86	0.01493	FBgn0000370, FBgn0000721, FBgn0001230, FBgn0001247, FBgn0001257, FBgn0003067, FBgn0003380, FBgn0004852, FBgn0004921, FBgn0011582, FBgn0015799, FBgn0020618, FBgn0023169, FBgn0024248, FBgn0024944, FBgn0025595, FBgn0025625, FBgn0026597, FBgn0027109, FBgn0028479, FBgn0029975, FBgn0030890, FBgn0031006, FBgn0032840, FBgn0033528, FBgn0033926, FBgn0034140, FBgn0034366, FBgn0034897, FBgn0035538, FBgn00356…	crc, for, Hsp68, Ide, ImpL2, Pepck1, Sh, Ac76E, Ggamma1, Dop1R1, Rbf, Rack1, AMPKalpha, chico, Oamb, AkhR, Sik2, Axn, NPF, Mtpalpha, spidey, CG7536, rictor, sNPF, trsn, Arc1, Lst, Atg7, Sesn, DopEcR, mthl2, Atg17, Gnmt, foxo, EndoA, Lrrk, Dcr-1, REPTOR, to, Jafrac1, Ilp6, spin, Thor, whd, Ih, Lpin, Dark, Slob, SNF4Agamma, CaMKII, Ric, rudhira, GlyS, Bruce	Biological_pathways	Up- and donw-regulated genes
GO:0030536	larval feeding behavior	12	8	3.86	0.01495	FBgn0000721, FBgn0013469, FBgn0026562, FBgn0027109, FBgn0028374, FBgn0032840, FBgn0037408, FBgn0262114	for, klu, SPARC, NPF, Hug, sNPF, NPFR, RanBPM	Biological_pathways	Up- and donw-regulated genes
GO:0030072	peptide hormone secretion	12	8	3.86	0.01495	FBgn0010379, FBgn0027575, FBgn0029939, FBgn0034140, FBgn0034475, FBgn0039770, FBgn0264574, FBgn0267002	Akt1, GABA-B-R2, CG9650, Lst, Obp56h, CG15537, Glut1, unc-104	Biological_pathways	Up- and donw-regulated genes
GO:1900180	regulation of protein localization to nucleus	12	8	3.86	0.01495	FBgn0002525, FBgn0003371, FBgn0004595, FBgn0014396, FBgn0021761, FBgn0024921, FBgn0039302, FBgn0264493	Lam, sgg, pros, tim, Nup154, Tnpo, Nup358, rdx	Biological_pathways	Up- and donw-regulated genes
GO:0045047	protein targeting to ER	18	14	5.8	0.01499	FBgn0010391, FBgn0010638, FBgn0010747, FBgn0011584, FBgn0015298, FBgn0025700, FBgn0030306, FBgn0032640, FBgn0035771, FBgn0035947, FBgn0036300, FBgn0038810, FBgn0040623, FBgn0086357	Gtp-bp, Sec61beta, Srp54k, Trp1, Srp19, CG5885, Spase25, Sgt, Sec63, Srp68, Pmm2, Srp72, Spase12, Sec61alpha	Biological_pathways	Up- and donw-regulated genes
GO:0035220	wing disc development	325	123	104.64	0.01575	FBgn0000083, FBgn0000179, FBgn0000180, FBgn0000273, FBgn0000289, FBgn0000395, FBgn0000547, FBgn0000711, FBgn0001075, FBgn0001083, FBgn0001235, FBgn0001297, FBgn0001319, FBgn0001987, FBgn0002643, FBgn0002931, FBgn0003090, FBgn0003118, FBgn0003371, FBgn0003415, FBgn0003447, FBgn0003463, FBgn0003731, FBgn0003896, FBgn0004198, FBgn0004390, FBgn0004395, FBgn0004607, FBgn0004638, FBgn0004647, FBgn00046…	AnxB9, bi, bib, Pka-C1, cg, cv-2, ed, flw, ft, fw, hth, kay, kn, Gli, mam, net, pk, pnt, sgg, skd, sn, sog, Egfr, tup, ct, RasGAP1, unk, zfh2, drk, N, svr, Mbs, ple, spi, corto, Fkbp14, fbl, heph, tsr, Chi, mirr, sty, SMC3, vri, spen, sfl, dom, dve, crol, CtBP, pio, Rack1, Nup154, Sin3A, RhoGEF2, EloB, brk, Actbeta, CG13366, msk, Mpcp2, Axn, CG6191, chm, CHOp24, Hs3st-B, daw, Wnt6, scaf, hui, wmd…	Biological_pathways	Up- and donw-regulated genes
GO:0031644	regulation of neurological system process	21	12	6.76	0.01579	FBgn0001134, FBgn0004244, FBgn0004622, FBgn0011582, FBgn0024944, FBgn0026439, FBgn0029891, FBgn0037140, FBgn0037976, FBgn0040752, FBgn0041188, FBgn0262739	Grd, Rdl, TkR99D, Dop1R1, Oamb, Eaat1, Pink1, SLC22A, Tk, Prosap, Atx2, AGO1	Biological_pathways	Up- and donw-regulated genes
GO:0044719	regulation of imaginal disc-derived wing size	21	12	6.76	0.01579	FBgn0000180, FBgn0024913, FBgn0027581, FBgn0031461, FBgn0031902, FBgn0035539, FBgn0036007, FBgn0036919, FBgn0038257, FBgn0053196, FBgn0259789, FBgn0262169	bib, Actbeta, CG6191, daw, Wnt6, slow, path, Grasp65, smp-30, dpy, zld, magu	Biological_pathways	Up- and donw-regulated genes
GO:0009068	aspartate family amino acid catabolic process	10	7	3.22	0.01601	FBgn0001125, FBgn0025720, FBgn0030653, FBgn0036997, FBgn0037684, FBgn0039094, FBgn0261014	Got2, Ate1, CG7860, CG5955, Srr, CG10184, TER94	Biological_pathways	Up- and donw-regulated genes
GO:0043153	entrainment of circadian clock by photoperiod	10	7	3.22	0.01601	FBgn0003068, FBgn0004611, FBgn0004618, FBgn0014019, FBgn0023178, FBgn0025680, FBgn0036260	per, Plc21C, gl, Rh5, Pdf, cry, Rh7	Biological_pathways	Up- and donw-regulated genes
GO:0002121	inter-male aggressive behavior	10	7	3.22	0.01601	FBgn0004244, FBgn0031866, FBgn0034636, FBgn0037976, FBgn0038839, FBgn0261953, FBgn0263241	Rdl, Nlg2, twz, Tk, Ktl, TfAP-2, Mocs1	Biological_pathways	Up- and donw-regulated genes
GO:0006084	acetyl-CoA metabolic process	10	7	3.22	0.01601	FBgn0003965, FBgn0010611, FBgn0012034, FBgn0020236, FBgn0028325, FBgn0039635, FBgn0039737	v, Hmgs, AcCoAS, ATPCL, Pdha, Pdhb, CG7920	Biological_pathways	Up- and donw-regulated genes
GO:0098586	cellular response to virus	10	7	3.22	0.01601	FBgn0024807, FBgn0034246, FBgn0036134, FBgn0086357, FBgn0087035, FBgn0261014, FBgn0262116	DIP1, Dcr-2, FoxK, Sec61alpha, AGO2, TER94, RNASEK	Biological_pathways	Up- and donw-regulated genes
GO:0002253	activation of immune response	10	7	3.22	0.01601	FBgn0013576, FBgn0033402, FBgn0033438, FBgn0034476, FBgn0040321, FBgn0262473, FBgn0262579	mtd, Myd88, Mmp2, Toll-7, GNBP3, Tl, Ect4	Biological_pathways	Up- and donw-regulated genes
GO:0022600	digestive system process	10	7	3.22	0.01601	FBgn0000299, FBgn0011581, FBgn0023169, FBgn0037363, FBgn0037976, FBgn0261108, FBgn0265598	Col4a1, Ms, AMPKalpha, Atg17, Tk, Atg13, Bx	Biological_pathways	Up- and donw-regulated genes
GO:0019933	cAMP-mediated signaling	36	23	11.59	0.01604	FBgn0000273, FBgn0003116, FBgn0003255, FBgn0004573, FBgn0004852, FBgn0011582, FBgn0015269, FBgn0016650, FBgn0022710, FBgn0023178, FBgn0023416, FBgn0024150, FBgn0026575, FBgn0032048, FBgn0033313, FBgn0035538, FBgn0038063, FBgn0039747, FBgn0053517, FBgn0250910, FBgn0259243, FBgn0260753, FBgn0261988	Pka-C1, pn, rk, 5-HT7, Ac76E, Dop1R1, Nf1, Lgr1, Ac13E, Pdf, Ac3, Ac78C, hang, Dh31, Cirl, DopEcR, Octbeta2R, AdoR, Dop2R, Octbeta3R, Pka-R1, Pdfr, Gprk2	Biological_pathways	Up- and donw-regulated genes
GO:0045475	locomotor rhythm	66	30	21.25	0.0162	FBgn0001297, FBgn0002917, FBgn0003068, FBgn0003371, FBgn0005536, FBgn0011205, FBgn0012344, FBgn0014396, FBgn0015269, FBgn0016076, FBgn0017561, FBgn0023076, FBgn0023178, FBgn0023416, FBgn0025680, FBgn0027109, FBgn0029891, FBgn0031759, FBgn0035023, FBgn0038197, FBgn0041188, FBgn0044050, FBgn0050446, FBgn0053988, FBgn0260753, FBgn0261268, FBgn0261808, FBgn0263397, FBgn0265598, FBgn0265784	kay, na, per, sgg, Mbs, fbl, Dh44, tim, Nf1, vri, Ork1, Clk, Pdf, Ac3, cry, NPF, Pink1, lid, ITP, foxo, Atx2, Ilp3, Tdc2, Mid1, Pdfr, Cul3, cu, Ih, Bx, CrebB	Biological_pathways	Up- and donw-regulated genes
GO:0071310	cellular response to organic substance	254	98	81.78	0.0167	FBgn0000037, FBgn0000273, FBgn0000370, FBgn0000395, FBgn0000541, FBgn0000568, FBgn0001218, FBgn0001220, FBgn0001230, FBgn0001257, FBgn0001942, FBgn0003067, FBgn0003118, FBgn0003255, FBgn0003371, FBgn0003380, FBgn0003463, FBgn0003651, FBgn0004390, FBgn0004636, FBgn0004638, FBgn0010379, FBgn0010602, FBgn0011582, FBgn0011604, FBgn0012344, FBgn0013278, FBgn0013767, FBgn0014135, FBgn0014388, FBgn00148…	mAChR-A, Pka-C1, crc, cv-2, E(bx), Eip75B, Hsc70-3, Hsc70-5, Hsp68, ImpL2, eIF4A, Pepck1, pnt, rk, sgg, Sh, sog, svp, RasGAP1, Rap1, drk, Akt1, lwr, Dop1R1, Iswi, Dh44, Hsp70Ba, Crz, bnl, sty, Hr38, Cnx99A, Lis-1, Lgr1, sfl, Pdk1, Xbp1, chico, brk, Sirt1, Sec13, AkhR, Sik2, trbl, Smurf, Shmt, hiw, rictor, Spp, PICK1, Edem2, Cul2, sand, Mmp2, Dh44-R2, Sin1, Lst, Sesn, Chd64, DopEcR, DOR, Oatp74D, …	Biological_pathways	Up- and donw-regulated genes
GO:0070997	neuron death	38	19	12.24	0.01671	FBgn0000108, FBgn0002622, FBgn0003656, FBgn0003965, FBgn0004647, FBgn0010379, FBgn0012036, FBgn0017579, FBgn0026080, FBgn0026252, FBgn0029891, FBgn0038816, FBgn0041188, FBgn0051216, FBgn0085451, FBgn0261014, FBgn0262579, FBgn0263986, FBgn0266579	Appl, RpS3, sws, v, N, Akt1, Aldh, RpL14, Tip60, msk, Pink1, Lrrk, Atx2, Naam, htk, TER94, Ect4, cd, tau	Biological_pathways	Up- and donw-regulated genes
GO:0006814	sodium ion transport	26	14	8.37	0.01798	FBgn0002921, FBgn0015777, FBgn0028704, FBgn0029762, FBgn0030795, FBgn0031865, FBgn0032946, FBgn0036279, FBgn0036816, FBgn0040297, FBgn0051547, FBgn0085434, FBgn0259111, FBgn0263390	Atpalpha, nrv2, Nckx30C, NAAT1, ppk28, Nha1, nrv3, Ncc69, Indy, Nhe2, NKCC, NaCP60E, Ndae1, Nha2	Biological_pathways	Up- and donw-regulated genes
GO:0006109	regulation of carbohydrate metabolic process	19	11	6.12	0.01831	FBgn0001247, FBgn0004647, FBgn0020618, FBgn0027550, FBgn0032840, FBgn0034950, FBgn0036428, FBgn0036927, FBgn0038074, FBgn0039747, FBgn0266064	Ide, N, Rack1, CG6495, sNPF, Pask, Gbs-70E, Gabat, Gnmt, AdoR, GlyS	Biological_pathways	Up- and donw-regulated genes
GO:0071711	basement membrane organization	19	11	6.12	0.01831	FBgn0000299, FBgn0016075, FBgn0026403, FBgn0026562, FBgn0033438, FBgn0035049, FBgn0260660, FBgn0261800, FBgn0262125, FBgn0262126, FBgn0267348	Col4a1, vkg, Ndg, SPARC, Mmp2, Mmp1, Mp, LanB1, Sec23, Sec24CD, LanB2	Biological_pathways	Up- and donw-regulated genes
GO:0007525	somatic muscle development	64	29	20.61	0.01878	FBgn0000286, FBgn0001091, FBgn0001235, FBgn0001258, FBgn0001319, FBgn0001994, FBgn0003071, FBgn0003415, FBgn0003499, FBgn0010379, FBgn0010812, FBgn0014869, FBgn0022764, FBgn0023212, FBgn0025633, FBgn0030855, FBgn0031759, FBgn0035153, FBgn0037076, FBgn0037659, FBgn0038197, FBgn0086355, FBgn0250906, FBgn0260442, FBgn0261238, FBgn0261560, FBgn0262473, FBgn0262527, FBgn0265935	Cf2, Gapdh1, hth, Ldh, kn, crp, Pfk, skd, sr, Akt1, unc-45, Pglym78, Sin3A, EloB, CG13366, CG5800, lid, ebd1, ebd2, Kdm2, foxo, Tpi, Pgk, rhea, Alh, Thor, Tl, nsl1, coro	Biological_pathways	Up- and donw-regulated genes
GO:0034605	cellular response to heat	31	16	9.98	0.01915	FBgn0001218, FBgn0001220, FBgn0001222, FBgn0001230, FBgn0001233, FBgn0010812, FBgn0013278, FBgn0015245, FBgn0024329, FBgn0024509, FBgn0028396, FBgn0037382, FBgn0039120, FBgn0039562, FBgn0044812, FBgn0266599	Hsc70-3, Hsc70-5, Hsf, Hsp68, Hsp83, unc-45, Hsp70Ba, Hsp60A, Mekk1, Sec13, TotA, Hpr1, Nup98-96, Gp93, TotC, Hsc70-4	Biological_pathways	Up- and donw-regulated genes
GO:0007405	neuroblast proliferation	80	35	25.76	0.0194	FBgn0000163, FBgn0000536, FBgn0002121, FBgn0003118, FBgn0004595, FBgn0004647, FBgn0004889, FBgn0004921, FBgn0010300, FBgn0013469, FBgn0013765, FBgn0015589, FBgn0015754, FBgn0015805, FBgn0019624, FBgn0023388, FBgn0024555, FBgn0024913, FBgn0025463, FBgn0026192, FBgn0027509, FBgn0027948, FBgn0030733, FBgn0031375, FBgn0031461, FBgn0032833, FBgn0034087, FBgn0034975, FBgn0035205, FBgn0035754, FBgn00378…	baz, eas, l(2)gl, pnt, pros, N, tws, Ggamma1, brat, klu, cnn, Apc, Lis-1, HDAC1, COX5A, Dap160, flfl, Actbeta, Bap60, par-6, TBCD, msps, UQCR-14, erm, daw, COX4, clu, enok, Ctr9, MED4, CG5214, COX7C, zld, zip, wake	Biological_pathways	Up- and donw-regulated genes
GO:1901605	alpha-amino acid metabolic process	94	59	30.27	0.01953	FBgn0001098, FBgn0001124, FBgn0001125, FBgn0001145, FBgn0001208, FBgn0003189, FBgn0003423, FBgn0003965, FBgn0004516, FBgn0005626, FBgn0010497, FBgn0013307, FBgn0014427, FBgn0014455, FBgn0016013, FBgn0022774, FBgn0023129, FBgn0023535, FBgn0023537, FBgn0025720, FBgn0026565, FBgn0027945, FBgn0029823, FBgn0030482, FBgn0030653, FBgn0031148, FBgn0031860, FBgn0032287, FBgn0032726, FBgn0032727, FBgn00335…	Gdh, Got1, Got2, Gs2, Hn, r, slgA, v, Gad1, ple, dmGlut, Odc1, CG11899, Ahcy, Faa, Oat, aay, arg, CG17896, Ate1, Ass, ppl, Shmt, CG1673, CG7860, Cbs, CG11236, CG6415, CG10621, CG10623, CG12338, Mtap, Sardh, CG15093, CG7560, CG7430, Gabat, Hpd, CG5955, P5CDh1, CG7470, Srr, GstZ2, Kyat, Gnmt, yellow-f2, P5cr-2, CG10184, PH4alphaEFB, Mccc1, hgo, CG15864, Mccc2, CG18749, TER94, SelD, GLS, Dark, cd	Biological_pathways	Up- and donw-regulated genes
GO:0090263	positive regulation of canonical Wnt signaling pathway	36	18	11.59	0.01961	FBgn0000711, FBgn0003134, FBgn0003415, FBgn0004380, FBgn0004889, FBgn0011481, FBgn0016977, FBgn0020496, FBgn0027508, FBgn0034372, FBgn0034709, FBgn0035153, FBgn0038862, FBgn0039054, FBgn0087002, FBgn0260635, FBgn0263930, FBgn0265974	flw, Pp1alpha-96A, skd, Klp64D, tws, Ssdp, spen, CtBP, Tnks, Gint3, Swim, ebd1, Usp8, Cow, apolpp, Diap1, dally, ttv	Biological_pathways	Up- and donw-regulated genes
GO:1901214	regulation of neuron death	36	18	11.59	0.01961	FBgn0000108, FBgn0002622, FBgn0003965, FBgn0004647, FBgn0010379, FBgn0012036, FBgn0017579, FBgn0026080, FBgn0026252, FBgn0029891, FBgn0038816, FBgn0041188, FBgn0051216, FBgn0085451, FBgn0261014, FBgn0262579, FBgn0263986, FBgn0266579	Appl, RpS3, v, N, Akt1, Aldh, RpL14, Tip60, msk, Pink1, Lrrk, Atx2, Naam, htk, TER94, Ect4, cd, tau	Biological_pathways	Up- and donw-regulated genes
GO:0017144	drug metabolic process	231	106	74.38	0.01977	FBgn0000024, FBgn0000153, FBgn0000261, FBgn0000579, FBgn0001091, FBgn0001092, FBgn0001128, FBgn0001186, FBgn0001187, FBgn0001208, FBgn0001989, FBgn0002036, FBgn0003067, FBgn0003071, FBgn0003141, FBgn0003162, FBgn0004647, FBgn0005278, FBgn0005626, FBgn0005671, FBgn0010217, FBgn0011211, FBgn0011361, FBgn0012034, FBgn0014391, FBgn0014455, FBgn0014869, FBgn0015031, FBgn0016013, FBgn0016119, FBgn00161…	Ace, b, Cat, Eno, Gapdh1, Gapdh2, Gpdh1, Hex-A, Hex-C, Hn, ND-B17, CG10561, Pepck1, Pfk, pr, Pu, N, Sam-S, ple, Vha55, ATPsynbeta, blw, ND-ACP, AcCoAS, sun, Ahcy, Pglym78, cype, Faa, ATPsynCF6, ATPsynD, ATPsynO, COX5A, AANAT1, ATPsynB, ATPsyngamma, ATPCL, Irp-1B, Manf, Idh3a, ppl, Hml, Shmt, ND-ASHI, Pink1, ND-MNLL, CG12118, CG5599, UQCR-14, Cbs, Tspo, ND-B17.2, obst-E, CG6415, COX4, PPO2, Etf-QO…	Biological_pathways	Up- and donw-regulated genes
GO:0032870	cellular response to hormone stimulus	99	42	31.88	0.02011	FBgn0000037, FBgn0000541, FBgn0000568, FBgn0001257, FBgn0003255, FBgn0003371, FBgn0003651, FBgn0010379, FBgn0011604, FBgn0012344, FBgn0014859, FBgn0016650, FBgn0020386, FBgn0024248, FBgn0024291, FBgn0024509, FBgn0025595, FBgn0025625, FBgn0028978, FBgn0031006, FBgn0033744, FBgn0033935, FBgn0035499, FBgn0035542, FBgn0036732, FBgn0037248, FBgn0038197, FBgn0038874, FBgn0038880, FBgn0039120, FBgn00393…	mAChR-A, E(bx), Eip75B, ImpL2, rk, sgg, svp, Akt1, Iswi, Dh44, Hr38, Lgr1, Pdk1, chico, Sirt1, Sec13, AkhR, Sik2, trbl, rictor, Dh44-R2, Sin1, Chd64, DOR, Oatp74D, srl, foxo, ETHR, SIFaR, Nup98-96, Nup358, CG15537, wrd, Ilp6, Ilp5, Ilp3, Thor, Tl, Lpin, Lpt, Lst8, sima	Biological_pathways	Up- and donw-regulated genes
GO:0009156	ribonucleoside monophosphate biosynthetic process	47	31	15.13	0.02039	FBgn0000052, FBgn0000053, FBgn0000579, FBgn0001091, FBgn0001092, FBgn0001186, FBgn0001187, FBgn0003071, FBgn0003257, FBgn0004647, FBgn0010217, FBgn0011211, FBgn0014391, FBgn0014869, FBgn0016119, FBgn0016120, FBgn0016691, FBgn0019644, FBgn0020235, FBgn0020513, FBgn0022338, FBgn0036030, FBgn0036337, FBgn0038224, FBgn0038467, FBgn0038957, FBgn0039241, FBgn0039830, FBgn0052626, FBgn0086355, FBgn02509…	Pfas, Gart, Eno, Gapdh1, Gapdh2, Hex-A, Hex-C, Pfk, r-l, N, ATPsynbeta, blw, sun, Pglym78, ATPsynCF6, ATPsynD, ATPsynO, ATPsynB, ATPsyngamma, Paics, dnk, CG6767, AdenoK, ATPsynE, AdSL, CG7059, CG11089, ATPsynC, AMPdeam, Tpi, Pgk	Biological_pathways	Up- and donw-regulated genes
GO:0010033	response to organic substance	414	157	133.3	0.02062	FBgn0000037, FBgn0000273, FBgn0000370, FBgn0000395, FBgn0000535, FBgn0000541, FBgn0000568, FBgn0000659, FBgn0000721, FBgn0001218, FBgn0001220, FBgn0001230, FBgn0001257, FBgn0001942, FBgn0002121, FBgn0003067, FBgn0003068, FBgn0003071, FBgn0003093, FBgn0003118, FBgn0003255, FBgn0003371, FBgn0003380, FBgn0003463, FBgn0003651, FBgn0003731, FBgn0004390, FBgn0004575, FBgn0004636, FBgn0004638, FBgn00056…	mAChR-A, Pka-C1, crc, cv-2, eag, E(bx), Eip75B, fkh, for, Hsc70-3, Hsc70-5, Hsp68, ImpL2, eIF4A, l(2)gl, Pepck1, per, Pfk, Pkc98E, pnt, rk, sgg, Sh, sog, svp, Egfr, RasGAP1, Syn, Rap1, drk, spi, Akt1, Nmdar1, lwr, Dif, Dop1R1, Iswi, AcCoAS, Aldh, Dh44, Hsp70Ba, CASK, Crz, bnl, sty, Hr38, Cnx99A, Cpr, ktub, Lis-1, Lgr1, klg, sfl, Pdk1, Xbp1, Clk, aay, Ac78C, chico, brk, Sirt1, Sec13, Cyp6g1, AkhR,…	Biological_pathways	Up- and donw-regulated genes
GO:0060249	anatomical structure homeostasis	130	59	41.86	0.02108	FBgn0000120, FBgn0000299, FBgn0000346, FBgn0002921, FBgn0002938, FBgn0003656, FBgn0003731, FBgn0003861, FBgn0003896, FBgn0003963, FBgn0004169, FBgn0004580, FBgn0004606, FBgn0004611, FBgn0004647, FBgn0010173, FBgn0010470, FBgn0011582, FBgn0011726, FBgn0011774, FBgn0015622, FBgn0015754, FBgn0019890, FBgn0020270, FBgn0020412, FBgn0020618, FBgn0024248, FBgn0027095, FBgn0027348, FBgn0027508, FBgn00285…	Arr1, Col4a1, comt, Atpalpha, ninaC, sws, Egfr, trp, tup, ush, up, Cbp53E, zfh1, Plc21C, N, RpA-70, Fkbp14, Dop1R1, tsr, Irbp, Cnx99A, Lis-1, Smg5, mre11, JIL-1, Rack1, chico, Manf, bgm, Tnks, hll, DNAlig4, wgn, uif, SP2353, wdp, rad50, Mkp3, srl, Atg17, Nmnat, Smg6, Gyf, Ku80, ZAP3, Pgk, Dys, rhea, TER94, Atg13, capt, nbs, RanBPM, ver, Dark, zip, mbl, Fhos, Ote	Biological_pathways	Up- and donw-regulated genes
GO:0098659	inorganic cation import across plasma membrane	17	10	5.47	0.02117	FBgn0002921, FBgn0015222, FBgn0015777, FBgn0032689, FBgn0032946, FBgn0036279, FBgn0038837, FBgn0040297, FBgn0051547, FBgn0053988	Atpalpha, Fer1HCH, nrv2, CG10413, nrv3, Ncc69, KaiR1D, Nhe2, NKCC, Mid1	Biological_pathways	Up- and donw-regulated genes
GO:0035293	chitin-based larval cuticle pattern formation	17	10	5.47	0.02117	FBgn0002121, FBgn0003371, FBgn0004396, FBgn0011509, FBgn0015589, FBgn0016797, FBgn0024509, FBgn0026597, FBgn0038947, FBgn0262125	l(2)gl, sgg, CrebA, SrpRbeta, Apc, fz2, Sec13, Axn, Sar1, Sec23	Biological_pathways	Up- and donw-regulated genes
GO:0030513	positive regulation of BMP signaling pathway	17	10	5.47	0.02117	FBgn0000395, FBgn0003463, FBgn0015754, FBgn0037015, FBgn0043364, FBgn0262169, FBgn0263930, FBgn0265048, FBgn0265974, FBgn0266420	cv-2, sog, Lis-1, cmpy, cbt, magu, dally, cv-d, ttv, Ote	Biological_pathways	Up- and donw-regulated genes
GO:0099587	inorganic ion import across plasma membrane	17	10	5.47	0.02117	FBgn0002921, FBgn0015222, FBgn0015777, FBgn0032689, FBgn0032946, FBgn0036279, FBgn0038837, FBgn0040297, FBgn0051547, FBgn0053988	Atpalpha, Fer1HCH, nrv2, CG10413, nrv3, Ncc69, KaiR1D, Nhe2, NKCC, Mid1	Biological_pathways	Up- and donw-regulated genes
GO:0035050	embryonic heart tube development	17	10	5.47	0.02117	FBgn0003896, FBgn0004921, FBgn0013764, FBgn0019662, FBgn0029504, FBgn0033438, FBgn0035049, FBgn0038947, FBgn0261800, FBgn0264089	tup, Ggamma1, Chi, qm, CHES-1-like, Mmp2, Mmp1, Sar1, LanB1, sli	Biological_pathways	Up- and donw-regulated genes
GO:0055067	monovalent inorganic cation homeostasis	29	15	9.34	0.02251	FBgn0002921, FBgn0005671, FBgn0015777, FBgn0028670, FBgn0028671, FBgn0032689, FBgn0032946, FBgn0033692, FBgn0036043, FBgn0036279, FBgn0036697, FBgn0040297, FBgn0051547, FBgn0259111, FBgn0263598	Atpalpha, Vha55, nrv2, Vha100-2, Vha100-1, CG10413, nrv3, wash, CG8177, Ncc69, rogdi, Nhe2, NKCC, Ndae1, Vha68-2	Biological_pathways	Up- and donw-regulated genes
GO:0006811	ion transport	348	159	112.05	0.02259	FBgn0000036, FBgn0000535, FBgn0001134, FBgn0002917, FBgn0002921, FBgn0003218, FBgn0003380, FBgn0003429, FBgn0003861, FBgn0004244, FBgn0004363, FBgn0004611, FBgn0004619, FBgn0005564, FBgn0005671, FBgn0010217, FBgn0010399, FBgn0010414, FBgn0010497, FBgn0011211, FBgn0011589, FBgn0011672, FBgn0013953, FBgn0013995, FBgn0014391, FBgn0015222, FBgn0015519, FBgn0015622, FBgn0015777, FBgn0016119, FBgn00161…	nAChRalpha1, eag, Grd, na, Atpalpha, rdgB, Sh, slo, trp, Rdl, porin, Plc21C, GluRIA, Shal, Vha55, ATPsynbeta, Nmdar1, SerT, dmGlut, blw, Elk, Mvl, Esp, Calx, sun, Fer1HCH, nAChRalpha3, Cnx99A, nrv2, ATPsynCF6, ATPsynD, ATPsynO, Ork1, ATPsynB, ATPsyngamma, dve, Vha36-1, Picot, GluClalpha, Mpcp2, Eaat1, CG4928, Dic1, VhaSFD, Syt4, JhI-21, aralar1, VhaPPA1-1, Vha100-2, Vha100-1, Nckx30C, CG15270, Nt…	Biological_pathways	Up- and donw-regulated genes
GO:0030510	regulation of BMP signaling pathway	34	17	10.95	0.02303	FBgn0000395, FBgn0001942, FBgn0003463, FBgn0015754, FBgn0024250, FBgn0029006, FBgn0030600, FBgn0032956, FBgn0037015, FBgn0043364, FBgn0086676, FBgn0262169, FBgn0263593, FBgn0263930, FBgn0265048, FBgn0265974, FBgn0266420	cv-2, eIF4A, sog, Lis-1, brk, Smurf, hiw, Cul2, cmpy, cbt, spin, magu, Lpin, dally, cv-d, ttv, Ote	Biological_pathways	Up- and donw-regulated genes
GO:0072091	regulation of stem cell proliferation	52	24	16.74	0.02425	FBgn0002121, FBgn0003118, FBgn0004595, FBgn0004647, FBgn0004889, FBgn0010300, FBgn0013469, FBgn0013576, FBgn0015805, FBgn0019624, FBgn0023388, FBgn0024913, FBgn0025463, FBgn0030733, FBgn0031375, FBgn0031461, FBgn0032833, FBgn0033438, FBgn0034718, FBgn0035205, FBgn0035754, FBgn0037891, FBgn0040773, FBgn0259789	l(2)gl, pnt, pros, N, tws, brat, klu, mtd, HDAC1, COX5A, Dap160, Actbeta, Bap60, UQCR-14, erm, daw, COX4, Mmp2, wdp, Ctr9, MED4, CG5214, COX7C, zld	Biological_pathways	Up- and donw-regulated genes
GO:0009914	hormone transport	15	9	4.83	0.02442	FBgn0010379, FBgn0027575, FBgn0029939, FBgn0034140, FBgn0034475, FBgn0037140, FBgn0039770, FBgn0264574, FBgn0267002	Akt1, GABA-B-R2, CG9650, Lst, Obp56h, SLC22A, CG15537, Glut1, unc-104	Biological_pathways	Up- and donw-regulated genes
GO:0009190	cyclic nucleotide biosynthetic process	15	9	4.83	0.02442	FBgn0004852, FBgn0010197, FBgn0013973, FBgn0022710, FBgn0023416, FBgn0024150, FBgn0038435, FBgn0038436, FBgn0053958	Ac76E, Gyc32E, Gycbeta100B, Ac13E, Ac3, Ac78C, Gyc89Da, Gyc89Db, CG33958	Biological_pathways	Up- and donw-regulated genes
GO:0044091	membrane biogenesis	15	9	4.83	0.02442	FBgn0001987, FBgn0011661, FBgn0027356, FBgn0031866, FBgn0034972, FBgn0038975, FBgn0051146, FBgn0083963, FBgn0083975	Gli, Moe, Amph, Nlg2, CG10339, Nrx-1, Nlg1, Nlg3, Nlg4	Biological_pathways	Up- and donw-regulated genes
GO:0042337	cuticle development involved in chitin-based cuticle molting cycle	22	12	7.08	0.02473	FBgn0001112, FBgn0002121, FBgn0003162, FBgn0003371, FBgn0004396, FBgn0011509, FBgn0015589, FBgn0016797, FBgn0024509, FBgn0026597, FBgn0038947, FBgn0262125	Gld, l(2)gl, Pu, sgg, CrebA, SrpRbeta, Apc, fz2, Sec13, Axn, Sar1, Sec23	Biological_pathways	Up- and donw-regulated genes
GO:0006936	muscle contraction	22	12	7.08	0.02473	FBgn0000500, FBgn0002772, FBgn0003721, FBgn0004169, FBgn0011581, FBgn0026439, FBgn0027356, FBgn0027556, FBgn0029161, FBgn0035499, FBgn0037976, FBgn0265434	Dsk, Mlc1, Tm1, up, Ms, Eaat1, Amph, CG4928, slmo, Chd64, Tk, zip	Biological_pathways	Up- and donw-regulated genes
GO:0072089	stem cell proliferation	92	39	29.62	0.02481	FBgn0000163, FBgn0000536, FBgn0002121, FBgn0003118, FBgn0004595, FBgn0004647, FBgn0004889, FBgn0004921, FBgn0010300, FBgn0013469, FBgn0013576, FBgn0013765, FBgn0015589, FBgn0015754, FBgn0015805, FBgn0019624, FBgn0023388, FBgn0024555, FBgn0024913, FBgn0025463, FBgn0026192, FBgn0027509, FBgn0027948, FBgn0030733, FBgn0031375, FBgn0031461, FBgn0032833, FBgn0033438, FBgn0034087, FBgn0034718, FBgn00349…	baz, eas, l(2)gl, pnt, pros, N, tws, Ggamma1, brat, klu, mtd, cnn, Apc, Lis-1, HDAC1, COX5A, Dap160, flfl, Actbeta, Bap60, par-6, TBCD, msps, UQCR-14, erm, daw, COX4, Mmp2, clu, wdp, enok, Ctr9, MED4, CG5214, COX7C, zld, scrib, zip, wake	Biological_pathways	Up- and donw-regulated genes
GO:0006520	cellular amino acid metabolic process	151	81	48.62	0.02518	FBgn0000153, FBgn0000565, FBgn0001098, FBgn0001124, FBgn0001125, FBgn0001145, FBgn0001208, FBgn0003189, FBgn0003423, FBgn0003965, FBgn0004516, FBgn0005626, FBgn0005674, FBgn0010497, FBgn0010803, FBgn0013307, FBgn0014427, FBgn0014455, FBgn0016013, FBgn0020385, FBgn0022774, FBgn0023129, FBgn0023535, FBgn0023537, FBgn0025720, FBgn0026565, FBgn0027079, FBgn0027080, FBgn0027081, FBgn0027084, FBgn00270…	b, Eip71CD, Gdh, Got1, Got2, Gs2, Hn, r, slgA, v, Gad1, ple, GluProRS, dmGlut, TrpRS, Odc1, CG11899, Ahcy, Faa, pug, Oat, aay, arg, CG17896, Ate1, Ass, ValRS, TyrRS, ThrRS, LysRS, LeuRS-m, IleRS, AlaRS, ppl, Shmt, CG1673, CG7860, Cbs, SerRS, CG11236, CG6415, CG10621, CG10623, CG12338, CysRS-m, Mtap, Sardh, CG15093, Trh, ValRS-m, CG7560, CG7430, Gabat, Hpd, CG5955, P5CDh1, CG7470, Srr, GstZ2, CG81…	Biological_pathways	Up- and donw-regulated genes
GO:0050808	synapse organization	267	110	85.97	0.0261	FBgn0000017, FBgn0000044, FBgn0000108, FBgn0000163, FBgn0000173, FBgn0000500, FBgn0001125, FBgn0001145, FBgn0001297, FBgn0001987, FBgn0002921, FBgn0003371, FBgn0003429, FBgn0003462, FBgn0004449, FBgn0004516, FBgn0004575, FBgn0004595, FBgn0005586, FBgn0010300, FBgn0010379, FBgn0010762, FBgn0011802, FBgn0013759, FBgn0015269, FBgn0015380, FBgn0015790, FBgn0015803, FBgn0016797, FBgn0017590, FBgn00199…	Abl, Act57B, Appl, baz, ben, Dsk, Got2, Gs2, kay, Gli, Atpalpha, sgg, slo, Sod1, Ten-m, Gad1, Syn, pros, Rab3, brat, Akt1, simj, Gem3, CASK, Nf1, drl, Rab11, RtGEF, fz2, klg, mGluR, Pdk1, caps, stan, Top3beta, Tip60, par-6, hiw, Lrp4, dpr18, Frq1, rictor, DIP-eta, Nlg2, PICK1, Cul2, Sin1, Synj, CG10339, SiaT, Strip, velo, sff, cmpy, dpr16, Ada2b, ATP6AP2, dpr5, Octbeta2R, Lrrk, Sar1, Nrx-1, Nmnat…	Biological_pathways	Up- and donw-regulated genes
GO:0044281	small molecule metabolic process	645	290	207.68	0.02623	FBgn0000052, FBgn0000053, FBgn0000150, FBgn0000153, FBgn0000565, FBgn0000568, FBgn0000579, FBgn0001091, FBgn0001092, FBgn0001098, FBgn0001112, FBgn0001124, FBgn0001125, FBgn0001128, FBgn0001145, FBgn0001186, FBgn0001187, FBgn0001208, FBgn0001248, FBgn0001258, FBgn0001989, FBgn0002641, FBgn0002719, FBgn0002937, FBgn0003067, FBgn0003071, FBgn0003116, FBgn0003141, FBgn0003162, FBgn0003189, FBgn00032…	Pfas, Gart, awd, b, Eip71CD, Eip75B, Eno, Gapdh1, Gapdh2, Gdh, Gld, Got1, Got2, Gpdh1, Gs2, Hex-A, Hex-C, Hn, Idh, Ldh, ND-B17, mal, Men, ninaB, Pepck1, Pfk, pn, pr, Pu, r, r-l, shd, slgA, v, Zw, Gad1, Plc21C, N, Pgd, Ac76E, ple, Vha55, GluProRS, Gyc32E, ATPsynbeta, Nmdmc, Cds, dmGlut, Hmgs, TrpRS, fbl, blw, ND-ACP, e(r), Pdh, Fdx1, AcCoAS, Aldh, Odc1, Gycbeta100B, sun, CG11899, Ahcy, Pglym78, cy…	Biological_pathways	Up- and donw-regulated genes
GO:0042133	neurotransmitter metabolic process	27	14	8.69	0.02649	FBgn0000024, FBgn0000153, FBgn0004516, FBgn0019643, FBgn0027945, FBgn0029823, FBgn0032287, FBgn0035187, FBgn0036762, FBgn0036927, FBgn0037153, FBgn0038641, FBgn0039094, FBgn0086367	Ace, b, Gad1, AANAT1, ppl, Shmt, CG6415, Trh, CG7430, Gabat, olf413, CG7708, CG10184, t	Biological_pathways	Up- and donw-regulated genes
GO:0051050	positive regulation of transport	106	44	34.13	0.02651	FBgn0000017, FBgn0002044, FBgn0003091, FBgn0003321, FBgn0004638, FBgn0010348, FBgn0010660, FBgn0011661, FBgn0011672, FBgn0011726, FBgn0013759, FBgn0014396, FBgn0015790, FBgn0021761, FBgn0025678, FBgn0027598, FBgn0028400, FBgn0029006, FBgn0030329, FBgn0032136, FBgn0032447, FBgn0033872, FBgn0034718, FBgn0036448, FBgn0038065, FBgn0038947, FBgn0038975, FBgn0039302, FBgn0039709, FBgn0041585, FBgn00510…	Abl, swm, Pkc53E, sbr, drk, Arf79F, Nup214, Moe, Mvl, tsr, CASK, tim, Rab11, Nup154, CaBP1, cindr, Syt4, Smurf, prtp, Apoltp, PICK1, CG6329, wdp, mop, Snx3, Sar1, Nrx-1, Nup358, Cad99C, olf186-F, LpR2, Sec61alpha, eater, corn, Hip14, sdt, Gprk2, Sec23, Sec24CD, mib1, Glut1, Fife, Sec5, unc-104	Biological_pathways	Up- and donw-regulated genes
GO:0120036	plasma membrane bounded cell projection organization	497	180	160.02	0.02687	FBgn0000017, FBgn0000108, FBgn0000163, FBgn0000173, FBgn0000273, FBgn0000414, FBgn0000504, FBgn0000581, FBgn0000721, FBgn0001075, FBgn0001083, FBgn0001257, FBgn0001297, FBgn0001308, FBgn0001319, FBgn0001987, FBgn0002023, FBgn0003090, FBgn0003334, FBgn0003371, FBgn0003380, FBgn0003447, FBgn0003721, FBgn0003862, FBgn0003885, FBgn0003888, FBgn0003896, FBgn0004055, FBgn0004198, FBgn0004370, FBgn00043…	Abl, Appl, baz, ben, Pka-C1, Dab, dsx, E(Pc), for, ft, fw, ImpL2, kay, Khc, kn, Gli, Lim3, pk, Scm, sgg, Sh, sn, Tm1, trx, alphaTub84D, betaTub60D, tup, uzip, ct, Ptp10D, Klp64D, Ten-m, Rop, pros, zfh1, Rap1, N, fs(1)h, Gnf1, Mbs, nvy, Con, brat, Akt1, Gtp-bp, trn, tutl, sqz, TrpRS, Moe, Tig, tsr, pnut, Chi, bnl, mirr, drl, CadN, SMC3, Dref, Lis-1, Nak, NetB, HDAC1, side, vri, fz2, spen, dom, chb…	Biological_pathways	Up- and donw-regulated genes
GO:0044272	sulfur compound biosynthetic process	32	16	10.3	0.02709	FBgn0005278, FBgn0012034, FBgn0020236, FBgn0020389, FBgn0028325, FBgn0029158, FBgn0030662, FBgn0031148, FBgn0032726, FBgn0032727, FBgn0034215, FBgn0036157, FBgn0037709, FBgn0039635, FBgn0040319, FBgn0046114	Sam-S, AcCoAS, ATPCL, Papss, Pdha, Las, CG9220, Cbs, CG10621, CG10623, Mtap, CG7560, CG8199, Pdhb, Gclc, Gclm	Biological_pathways	Up- and donw-regulated genes
GO:0009581	detection of external stimulus	63	28	20.28	0.02743	FBgn0000120, FBgn0002937, FBgn0002938, FBgn0002940, FBgn0003218, FBgn0003380, FBgn0003861, FBgn0004363, FBgn0004623, FBgn0004646, FBgn0010350, FBgn0013995, FBgn0014019, FBgn0015721, FBgn0025680, FBgn0033159, FBgn0036260, FBgn0037163, FBgn0037166, FBgn0038721, FBgn0085387, FBgn0086704, FBgn0086784, FBgn0261041, FBgn0264953, FBgn0265274, FBgn0265959, FBgn0267252	Arr1, ninaB, ninaC, ninaE, rdgB, Sh, trp, porin, Gbeta76C, ogre, Cds, Calx, Rh5, ktub, cry, Dscam1, Rh7, laza, CG11426, subdued, shakB, stops, stmA, stj, Piezo, Inx3, rdgC, Ggamma30A	Biological_pathways	Up- and donw-regulated genes
GO:0009582	detection of abiotic stimulus	63	28	20.28	0.02743	FBgn0000120, FBgn0002937, FBgn0002938, FBgn0002940, FBgn0003218, FBgn0003380, FBgn0003861, FBgn0004363, FBgn0004623, FBgn0004646, FBgn0010350, FBgn0013995, FBgn0014019, FBgn0015721, FBgn0025680, FBgn0033159, FBgn0036260, FBgn0037163, FBgn0037166, FBgn0038721, FBgn0085387, FBgn0086704, FBgn0086784, FBgn0261041, FBgn0264953, FBgn0265274, FBgn0265959, FBgn0267252	Arr1, ninaB, ninaC, ninaE, rdgB, Sh, trp, porin, Gbeta76C, ogre, Cds, Calx, Rh5, ktub, cry, Dscam1, Rh7, laza, CG11426, subdued, shakB, stops, stmA, stj, Piezo, Inx3, rdgC, Ggamma30A	Biological_pathways	Up- and donw-regulated genes
GO:0050877	nervous system process	329	152	105.93	0.0277	FBgn0000017, FBgn0000036, FBgn0000108, FBgn0000120, FBgn0000241, FBgn0000273, FBgn0000535, FBgn0000536, FBgn0000721, FBgn0001134, FBgn0001208, FBgn0002917, FBgn0002921, FBgn0002940, FBgn0003068, FBgn0003093, FBgn0003218, FBgn0003371, FBgn0003380, FBgn0003656, FBgn0003731, FBgn0003861, FBgn0004198, FBgn0004227, FBgn0004244, FBgn0004370, FBgn0004380, FBgn0004381, FBgn0004516, FBgn0004575, FBgn00045…	Abl, nAChRalpha1, Appl, Arr1, bw, Pka-C1, eag, eas, for, Grd, Hn, na, Atpalpha, ninaE, per, Pkc98E, rdgB, sgg, Sh, sws, Egfr, trp, ct, nonA, Rdl, Ptp10D, Klp64D, Klp68D, Gad1, Syn, pros, gl, TkR99D, drk, N, svr, 14-3-3zeta, Shal, Crys, spi, CanA1, Nmdar1, simj, Obp19d, Obp84a, Obp28a, Dop1R1, ine, Mvl, Sap47, CASK, Dhc93AB, Calx, Rh5, Nf1, drl, nAChRalpha3, ktub, nrv2, klg, mGluR, Ac78C, chico, O…	Biological_pathways	Up- and donw-regulated genes
GO:0035725	sodium ion transmembrane transport	13	8	4.19	0.02802	FBgn0002921, FBgn0015777, FBgn0032946, FBgn0036279, FBgn0040297, FBgn0051547, FBgn0085434, FBgn0259111	Atpalpha, nrv2, nrv3, Ncc69, Nhe2, NKCC, NaCP60E, Ndae1	Biological_pathways	Up- and donw-regulated genes
GO:0090257	regulation of muscle system process	13	8	4.19	0.02802	FBgn0000500, FBgn0004169, FBgn0011581, FBgn0026439, FBgn0027356, FBgn0027556, FBgn0037976, FBgn0063485	Dsk, up, Ms, Eaat1, Amph, CG4928, Tk, Lasp	Biological_pathways	Up- and donw-regulated genes
GO:0010675	regulation of cellular carbohydrate metabolic process	13	8	4.19	0.02802	FBgn0001247, FBgn0020618, FBgn0027550, FBgn0032840, FBgn0034950, FBgn0036428, FBgn0038074, FBgn0266064	Ide, Rack1, CG6495, sNPF, Pask, Gbs-70E, Gnmt, GlyS	Biological_pathways	Up- and donw-regulated genes
GO:0002118	aggressive behavior	13	8	4.19	0.02802	FBgn0004244, FBgn0031866, FBgn0033980, FBgn0034636, FBgn0037976, FBgn0038839, FBgn0261953, FBgn0263241	Rdl, Nlg2, Cyp6a20, twz, Tk, Ktl, TfAP-2, Mocs1	Biological_pathways	Up- and donw-regulated genes
GO:0009187	cyclic nucleotide metabolic process	20	11	6.44	0.02904	FBgn0004852, FBgn0010197, FBgn0013973, FBgn0022710, FBgn0023416, FBgn0024150, FBgn0038435, FBgn0038436, FBgn0053958, FBgn0264815, FBgn0266377	Ac76E, Gyc32E, Gycbeta100B, Ac13E, Ac3, Ac78C, Gyc89Da, Gyc89Db, CG33958, Pde1c, Pde8	Biological_pathways	Up- and donw-regulated genes
GO:0048871	multicellular organismal homeostasis	58	26	18.67	0.02926	FBgn0000120, FBgn0000299, FBgn0002921, FBgn0002938, FBgn0003068, FBgn0003656, FBgn0003731, FBgn0003861, FBgn0003896, FBgn0003963, FBgn0004618, FBgn0004647, FBgn0011603, FBgn0011726, FBgn0014396, FBgn0015622, FBgn0034718, FBgn0036844, FBgn0037248, FBgn0037363, FBgn0039254, FBgn0039714, FBgn0260442, FBgn0260753, FBgn0261108, FBgn0265434	Arr1, Col4a1, Atpalpha, ninaC, per, sws, Egfr, trp, tup, ush, gl, N, ine, tsr, tim, Cnx99A, wdp, Mkp3, srl, Atg17, Nmnat, Zip99C, rhea, Pdfr, Atg13, zip	Biological_pathways	Up- and donw-regulated genes
GO:0009161	ribonucleoside monophosphate metabolic process	118	58	37.99	0.02988	FBgn0000052, FBgn0000053, FBgn0000579, FBgn0001091, FBgn0001092, FBgn0001186, FBgn0001187, FBgn0001989, FBgn0003071, FBgn0003257, FBgn0004647, FBgn0005671, FBgn0010217, FBgn0011211, FBgn0011361, FBgn0014391, FBgn0014869, FBgn0015031, FBgn0016119, FBgn0016120, FBgn0016691, FBgn0019624, FBgn0019644, FBgn0020235, FBgn0020513, FBgn0022338, FBgn0029888, FBgn0029891, FBgn0029971, FBgn0030733, FBgn00312…	Pfas, Gart, Eno, Gapdh1, Gapdh2, Hex-A, Hex-C, ND-B17, Pfk, r-l, N, Vha55, ATPsynbeta, blw, ND-ACP, sun, Pglym78, cype, ATPsynCF6, ATPsynD, ATPsynO, COX5A, ATPsynB, ATPsyngamma, Paics, dnk, ND-ASHI, Pink1, ND-MNLL, UQCR-14, Tspo, ND-B17.2, COX4, Etf-QO, UQCR-6.4, ND-B12, levy, ND-19, CG6767, AdenoK, ND-39, srl, ATPsynE, UQCR-C1, AdSL, CG7059, SdhD, CG11089, ATPsynC, COX7A, COX7C, ND-13B, NT5E-2, …	Biological_pathways	Up- and donw-regulated genes
GO:1903825	organic acid transmembrane transport	40	19	12.88	0.03081	FBgn0026439, FBgn0027610, FBgn0028425, FBgn0028646, FBgn0029762, FBgn0031424, FBgn0034381, FBgn0035969, FBgn0036007, FBgn0036116, FBgn0036279, FBgn0036984, FBgn0037714, FBgn0037715, FBgn0037912, FBgn0038641, FBgn0038662, FBgn0051547, FBgn0261794	Eaat1, Dic1, JhI-21, aralar1, NAAT1, VGlut, List, CG4476, path, CG7888, Ncc69, CG13248, CG9396, CG9399, sea, CG7708, Mpc1, NKCC, kcc	Biological_pathways	Up- and donw-regulated genes
GO:1905039	carboxylic acid transmembrane transport	40	19	12.88	0.03081	FBgn0026439, FBgn0027610, FBgn0028425, FBgn0028646, FBgn0029762, FBgn0031424, FBgn0034381, FBgn0035969, FBgn0036007, FBgn0036116, FBgn0036279, FBgn0036984, FBgn0037714, FBgn0037715, FBgn0037912, FBgn0038641, FBgn0038662, FBgn0051547, FBgn0261794	Eaat1, Dic1, JhI-21, aralar1, NAAT1, VGlut, List, CG4476, path, CG7888, Ncc69, CG13248, CG9396, CG9399, sea, CG7708, Mpc1, NKCC, kcc	Biological_pathways	Up- and donw-regulated genes
GO:0016999	antibiotic metabolic process	40	19	12.88	0.03081	FBgn0000261, FBgn0001128, FBgn0003067, FBgn0012034, FBgn0020236, FBgn0024957, FBgn0027291, FBgn0030612, FBgn0033518, FBgn0036762, FBgn0037643, FBgn0037891, FBgn0038519, FBgn0038570, FBgn0039112, FBgn0039827, FBgn0040309, FBgn0261955, FBgn0262559	Cat, Gpdh1, Pepck1, AcCoAS, ATPCL, Irp-1B, Idh3a, CG5599, Prx2540-2, CG7430, ScsbetaA, CG5214, Prx3, Prx5, SdhD, CG1544, Jafrac1, kdn, Mdh2	Biological_pathways	Up- and donw-regulated genes
GO:0032200	telomere organization	25	13	8.05	0.03122	FBgn0010173, FBgn0011774, FBgn0019890, FBgn0020270, FBgn0020412, FBgn0027508, FBgn0030506, FBgn0034728, FBgn0039260, FBgn0041627, FBgn0052685, FBgn0261530, FBgn0262524	RpA-70, Irbp, Smg5, mre11, JIL-1, Tnks, DNAlig4, rad50, Smg6, Ku80, ZAP3, nbs, ver	Biological_pathways	Up- and donw-regulated genes
GO:0070328	triglyceride homeostasis	25	13	8.05	0.03122	FBgn0011204, FBgn0011205, FBgn0015721, FBgn0025595, FBgn0028519, FBgn0032940, FBgn0034140, FBgn0034999, FBgn0036053, FBgn0036449, FBgn0038074, FBgn0042693, FBgn0263864	cue, fbl, ktub, AkhR, hll, Mondo, Lst, Fatp3, iPLA2-VIA, bmm, Gnmt, wrd, Dark	Biological_pathways	Up- and donw-regulated genes
GO:0000723	telomere maintenance	25	13	8.05	0.03122	FBgn0010173, FBgn0011774, FBgn0019890, FBgn0020270, FBgn0020412, FBgn0027508, FBgn0030506, FBgn0034728, FBgn0039260, FBgn0041627, FBgn0052685, FBgn0261530, FBgn0262524	RpA-70, Irbp, Smg5, mre11, JIL-1, Tnks, DNAlig4, rad50, Smg6, Ku80, ZAP3, nbs, ver	Biological_pathways	Up- and donw-regulated genes
GO:0006937	regulation of muscle contraction	11	7	3.54	0.03188	FBgn0000500, FBgn0004169, FBgn0011581, FBgn0026439, FBgn0027356, FBgn0027556, FBgn0037976	Dsk, up, Ms, Eaat1, Amph, CG4928, Tk	Biological_pathways	Up- and donw-regulated genes
GO:0050878	regulation of body fluid levels	11	7	3.54	0.03188	FBgn0011603, FBgn0012344, FBgn0028418, FBgn0029167, FBgn0032048, FBgn0032773, FBgn0266569	ine, Dh44, Lk, Hml, Dh31, fon, CG42259	Biological_pathways	Up- and donw-regulated genes
GO:0007586	digestion	11	7	3.54	0.03188	FBgn0000299, FBgn0011581, FBgn0023169, FBgn0037363, FBgn0037976, FBgn0261108, FBgn0265598	Col4a1, Ms, AMPKalpha, Atg17, Tk, Atg13, Bx	Biological_pathways	Up- and donw-regulated genes
GO:0040040	thermosensory behavior	11	7	3.54	0.03188	FBgn0000273, FBgn0004907, FBgn0005626, FBgn0011582, FBgn0015714, FBgn0261985, FBgn0265784	Pka-C1, 14-3-3zeta, ple, Dop1R1, Cyp6a17, Ptpmeg, CrebB	Biological_pathways	Up- and donw-regulated genes
GO:0046959	habituation	11	7	3.54	0.03188	FBgn0000536, FBgn0000721, FBgn0003371, FBgn0010762, FBgn0035538, FBgn0041188, FBgn0262739	eas, for, sgg, simj, DopEcR, Atx2, AGO1	Biological_pathways	Up- and donw-regulated genes
GO:0090276	regulation of peptide hormone secretion	11	7	3.54	0.03188	FBgn0010379, FBgn0027575, FBgn0029939, FBgn0034140, FBgn0039770, FBgn0264574, FBgn0267002	Akt1, GABA-B-R2, CG9650, Lst, CG15537, Glut1, unc-104	Biological_pathways	Up- and donw-regulated genes
GO:0006721	terpenoid metabolic process	11	7	3.54	0.03188	FBgn0002937, FBgn0010053, FBgn0010611, FBgn0011693, FBgn0032336, FBgn0036713, FBgn0037896	ninaB, Jheh1, Hmgs, Pdh, AstC, Mip, ninaG	Biological_pathways	Up- and donw-regulated genes
GO:0015893	drug transport	30	15	9.66	0.0319	FBgn0004512, FBgn0010497, FBgn0026439, FBgn0027610, FBgn0028400, FBgn0028646, FBgn0031424, FBgn0033391, FBgn0036816, FBgn0037140, FBgn0037912, FBgn0038975, FBgn0260964, FBgn0261089, FBgn0263397	Mdr49, dmGlut, Eaat1, Dic1, Syt4, aralar1, VGlut, CG8026, Indy, SLC22A, sea, Nrx-1, Vmat, Sytalpha, Ih	Biological_pathways	Up- and donw-regulated genes
GO:0009124	nucleoside monophosphate biosynthetic process	48	31	15.45	0.03293	FBgn0000052, FBgn0000053, FBgn0000579, FBgn0001091, FBgn0001092, FBgn0001186, FBgn0001187, FBgn0003071, FBgn0003257, FBgn0004647, FBgn0010217, FBgn0011211, FBgn0014391, FBgn0014869, FBgn0016119, FBgn0016120, FBgn0016691, FBgn0019644, FBgn0020235, FBgn0020513, FBgn0022338, FBgn0036030, FBgn0036337, FBgn0038224, FBgn0038467, FBgn0038957, FBgn0039241, FBgn0039830, FBgn0052626, FBgn0086355, FBgn02509…	Pfas, Gart, Eno, Gapdh1, Gapdh2, Hex-A, Hex-C, Pfk, r-l, N, ATPsynbeta, blw, sun, Pglym78, ATPsynCF6, ATPsynD, ATPsynO, ATPsynB, ATPsyngamma, Paics, dnk, CG6767, AdenoK, ATPsynE, AdSL, CG7059, CG11089, ATPsynC, AMPdeam, Tpi, Pgk	Biological_pathways	Up- and donw-regulated genes
GO:0046496	nicotinamide nucleotide metabolic process	33	21	10.63	0.03347	FBgn0000579, FBgn0001091, FBgn0001092, FBgn0001098, FBgn0001128, FBgn0001186, FBgn0001187, FBgn0001248, FBgn0003071, FBgn0004057, FBgn0004647, FBgn0004654, FBgn0014869, FBgn0022160, FBgn0023477, FBgn0031589, FBgn0035436, FBgn0038957, FBgn0039254, FBgn0086355, FBgn0250906	Eno, Gapdh1, Gapdh2, Gdh, Gpdh1, Hex-A, Hex-C, Idh, Pfk, Zw, N, Pgd, Pglym78, Gpo1, Taldo, Naprt, CG12016, CG7059, Nmnat, Tpi, Pgk	Biological_pathways	Up- and donw-regulated genes
GO:0019362	pyridine nucleotide metabolic process	33	21	10.63	0.03347	FBgn0000579, FBgn0001091, FBgn0001092, FBgn0001098, FBgn0001128, FBgn0001186, FBgn0001187, FBgn0001248, FBgn0003071, FBgn0004057, FBgn0004647, FBgn0004654, FBgn0014869, FBgn0022160, FBgn0023477, FBgn0031589, FBgn0035436, FBgn0038957, FBgn0039254, FBgn0086355, FBgn0250906	Eno, Gapdh1, Gapdh2, Gdh, Gpdh1, Hex-A, Hex-C, Idh, Pfk, Zw, N, Pgd, Pglym78, Gpo1, Taldo, Naprt, CG12016, CG7059, Nmnat, Tpi, Pgk	Biological_pathways	Up- and donw-regulated genes
GO:0015980	energy derivation by oxidation of organic compounds	113	46	36.38	0.03383	FBgn0001989, FBgn0011361, FBgn0015031, FBgn0019624, FBgn0020618, FBgn0022160, FBgn0023507, FBgn0024957, FBgn0027291, FBgn0028646, FBgn0029888, FBgn0029891, FBgn0029971, FBgn0030087, FBgn0030612, FBgn0030733, FBgn0031359, FBgn0031436, FBgn0031971, FBgn0031995, FBgn0032833, FBgn0034245, FBgn0034618, FBgn0034645, FBgn0034877, FBgn0034950, FBgn0035046, FBgn0035978, FBgn0036428, FBgn0036762, FBgn00370…	ND-B17, ND-ACP, cype, COX5A, Rack1, Gpo1, D2hgdh, Irp-1B, Idh3a, aralar1, ND-ASHI, Pink1, ND-MNLL, CG7766, CG5599, UQCR-14, Rim2, ND-B17.2, Sirup, CG8475, COX4, UQCR-6.4, CG9485, ND-B12, levy, Pask, ND-19, UGP, Gbs-70E, CG7430, ND-39, Atg17, ScsbetaA, CG5214, foxo, UQCR-C1, SdhD, CG1544, COX7A, COX7C, ND-13B, AGBE, UQCR-C2, kdn, Mdh2, GlyS	Biological_pathways	Up- and donw-regulated genes
GO:0042592	homeostatic process	379	163	122.03	0.03451	FBgn0000120, FBgn0000261, FBgn0000299, FBgn0000346, FBgn0000500, FBgn0000579, FBgn0001092, FBgn0001186, FBgn0001187, FBgn0001218, FBgn0002868, FBgn0002921, FBgn0002938, FBgn0003067, FBgn0003068, FBgn0003071, FBgn0003255, FBgn0003651, FBgn0003656, FBgn0003731, FBgn0003861, FBgn0003896, FBgn0003963, FBgn0004169, FBgn0004580, FBgn0004606, FBgn0004611, FBgn0004618, FBgn0004647, FBgn0004654, FBgn00055…	Arr1, Cat, Col4a1, comt, Dsk, Eno, Gapdh2, Hex-A, Hex-C, Hsc70-3, MtnA, Atpalpha, ninaC, Pepck1, per, Pfk, rk, svp, sws, Egfr, trp, tup, ush, up, Cbp53E, zfh1, Plc21C, gl, N, Pgd, ey, Vha55, RpA-70, Akt1, Acbp2, Nmdar1, Fkbp14, cue, fbl, Dop1R1, ine, Mvl, tsr, Irbp, Pdi, tim, Fer1HCH, Cnx99A, Dref, ktub, Lis-1, nrv2, Smg5, ATPCL, mre11, JIL-1, Rack1, Trxr-1, Xbp1, amon, chico, Oamb, Irp-1B, AkhR,…	Biological_pathways	Up- and donw-regulated genes
GO:0007268	chemical synaptic transmission	261	104	84.04	0.03499	FBgn0000017, FBgn0000024, FBgn0000036, FBgn0000037, FBgn0000261, FBgn0000273, FBgn0000346, FBgn0001134, FBgn0001987, FBgn0002121, FBgn0002921, FBgn0003380, FBgn0003429, FBgn0003462, FBgn0003651, FBgn0004244, FBgn0004449, FBgn0004573, FBgn0004574, FBgn0004575, FBgn0004580, FBgn0004611, FBgn0004622, FBgn0004636, FBgn0004868, FBgn0005564, FBgn0005586, FBgn0010015, FBgn0010348, FBgn0010379, FBgn00103…	Abl, Ace, nAChRalpha1, mAChR-A, Cat, Pka-C1, comt, Grd, Gli, l(2)gl, Atpalpha, Sh, slo, Sod1, svp, Rdl, Ten-m, 5-HT7, Rop, Syn, Cbp53E, Plc21C, TkR99D, Rap1, Gdi, Shal, Rab3, CanA1, Arf79F, Akt1, Nmdar1, Snap25, Dop1R1, Sap47, CASK, Gycbeta100B, nAChRalpha3, Ipp, stnB, mGluR, chico, Oamb, GluClalpha, Tip60, HDAC6, Eaat1, Manf, GABA-B-R2, Syt4, NtR, Pink1, CG8916, Frq1, wgn, nAChRbeta3, VGlut, Nlg…	Biological_pathways	Up- and donw-regulated genes
GO:0098916	anterograde trans-synaptic signaling	261	104	84.04	0.03499	FBgn0000017, FBgn0000024, FBgn0000036, FBgn0000037, FBgn0000261, FBgn0000273, FBgn0000346, FBgn0001134, FBgn0001987, FBgn0002121, FBgn0002921, FBgn0003380, FBgn0003429, FBgn0003462, FBgn0003651, FBgn0004244, FBgn0004449, FBgn0004573, FBgn0004574, FBgn0004575, FBgn0004580, FBgn0004611, FBgn0004622, FBgn0004636, FBgn0004868, FBgn0005564, FBgn0005586, FBgn0010015, FBgn0010348, FBgn0010379, FBgn00103…	Abl, Ace, nAChRalpha1, mAChR-A, Cat, Pka-C1, comt, Grd, Gli, l(2)gl, Atpalpha, Sh, slo, Sod1, svp, Rdl, Ten-m, 5-HT7, Rop, Syn, Cbp53E, Plc21C, TkR99D, Rap1, Gdi, Shal, Rab3, CanA1, Arf79F, Akt1, Nmdar1, Snap25, Dop1R1, Sap47, CASK, Gycbeta100B, nAChRalpha3, Ipp, stnB, mGluR, chico, Oamb, GluClalpha, Tip60, HDAC6, Eaat1, Manf, GABA-B-R2, Syt4, NtR, Pink1, CG8916, Frq1, wgn, nAChRbeta3, VGlut, Nlg…	Biological_pathways	Up- and donw-regulated genes
GO:0061351	neural precursor cell proliferation	83	35	26.72	0.03504	FBgn0000163, FBgn0000536, FBgn0002121, FBgn0003118, FBgn0004595, FBgn0004647, FBgn0004889, FBgn0004921, FBgn0010300, FBgn0013469, FBgn0013765, FBgn0015589, FBgn0015754, FBgn0015805, FBgn0019624, FBgn0023388, FBgn0024555, FBgn0024913, FBgn0025463, FBgn0026192, FBgn0027509, FBgn0027948, FBgn0030733, FBgn0031375, FBgn0031461, FBgn0032833, FBgn0034087, FBgn0034975, FBgn0035205, FBgn0035754, FBgn00378…	baz, eas, l(2)gl, pnt, pros, N, tws, Ggamma1, brat, klu, cnn, Apc, Lis-1, HDAC1, COX5A, Dap160, flfl, Actbeta, Bap60, par-6, TBCD, msps, UQCR-14, erm, daw, COX4, clu, enok, Ctr9, MED4, CG5214, COX7C, zld, zip, wake	Biological_pathways	Up- and donw-regulated genes
GO:0007476	imaginal disc-derived wing morphogenesis	235	89	75.66	0.03535	FBgn0000179, FBgn0000180, FBgn0000273, FBgn0000289, FBgn0000395, FBgn0000547, FBgn0000711, FBgn0001075, FBgn0001083, FBgn0001235, FBgn0001319, FBgn0001987, FBgn0002643, FBgn0002931, FBgn0003090, FBgn0003118, FBgn0003371, FBgn0003447, FBgn0003463, FBgn0003731, FBgn0004198, FBgn0004390, FBgn0004395, FBgn0004607, FBgn0004638, FBgn0004647, FBgn0004648, FBgn0005536, FBgn0005672, FBgn0010313, FBgn00104…	bi, bib, Pka-C1, cg, cv-2, ed, flw, ft, fw, hth, kn, Gli, mam, net, pk, pnt, sgg, sn, sog, Egfr, ct, RasGAP1, unk, zfh2, drk, N, svr, Mbs, spi, corto, Fkbp14, fbl, heph, tsr, Chi, mirr, sty, SMC3, vri, spen, sfl, dve, crol, pio, RhoGEF2, EloB, brk, Actbeta, msk, Axn, CG6191, Hs3st-B, daw, Wnt6, wmd, slow, path, MYPT-75D, Mkp3, Grasp65, ATP6AP2, smp-30, Usp8, EloA, tnc, Gclc, Bap170, Drak, dpy, ji…	Biological_pathways	Up- and donw-regulated genes
GO:0009123	nucleoside monophosphate metabolic process	119	58	38.32	0.03577	FBgn0000052, FBgn0000053, FBgn0000579, FBgn0001091, FBgn0001092, FBgn0001186, FBgn0001187, FBgn0001989, FBgn0003071, FBgn0003257, FBgn0004647, FBgn0005671, FBgn0010217, FBgn0011211, FBgn0011361, FBgn0014391, FBgn0014869, FBgn0015031, FBgn0016119, FBgn0016120, FBgn0016691, FBgn0019624, FBgn0019644, FBgn0020235, FBgn0020513, FBgn0022338, FBgn0029888, FBgn0029891, FBgn0029971, FBgn0030733, FBgn00312…	Pfas, Gart, Eno, Gapdh1, Gapdh2, Hex-A, Hex-C, ND-B17, Pfk, r-l, N, Vha55, ATPsynbeta, blw, ND-ACP, sun, Pglym78, cype, ATPsynCF6, ATPsynD, ATPsynO, COX5A, ATPsynB, ATPsyngamma, Paics, dnk, ND-ASHI, Pink1, ND-MNLL, UQCR-14, Tspo, ND-B17.2, COX4, Etf-QO, UQCR-6.4, ND-B12, levy, ND-19, CG6767, AdenoK, ND-39, srl, ATPsynE, UQCR-C1, AdSL, CG7059, SdhD, CG11089, ATPsynC, COX7A, COX7C, ND-13B, NT5E-2, …	Biological_pathways	Up- and donw-regulated genes
GO:0042221	response to chemical	841	329	270.78	0.03597	FBgn0000017, FBgn0000036, FBgn0000037, FBgn0000173, FBgn0000261, FBgn0000273, FBgn0000370, FBgn0000395, FBgn0000414, FBgn0000504, FBgn0000535, FBgn0000541, FBgn0000565, FBgn0000568, FBgn0000581, FBgn0000659, FBgn0000721, FBgn0001218, FBgn0001220, FBgn0001230, FBgn0001248, FBgn0001257, FBgn0001308, FBgn0001942, FBgn0002023, FBgn0002031, FBgn0002121, FBgn0002868, FBgn0002917, FBgn0003067, FBgn00030…	Abl, nAChRalpha1, mAChR-A, ben, Cat, Pka-C1, crc, cv-2, Dab, dsx, eag, E(bx), Eip71CD, Eip75B, E(Pc), fkh, for, Hsc70-3, Hsc70-5, Hsp68, Idh, ImpL2, Khc, eIF4A, Lim3, l(2)37Cc, l(2)gl, MtnA, na, Pepck1, per, Pfk, pk, Pkc98E, pnt, rk, sgg, Sh, slo, Sod1, sog, svp, Egfr, trp, trx, betaTub60D, tup, uzip, ct, Rdl, Ptp10D, Klp64D, RasGAP1, Ten-m, Mdr49, Gad1, Syn, pros, zfh1, TkR99D, Rap1, drk, N, 14-…	Biological_pathways	Up- and donw-regulated genes
GO:0003013	circulatory system process	38	18	12.24	0.03614	FBgn0000535, FBgn0000721, FBgn0003731, FBgn0004169, FBgn0004921, FBgn0005672, FBgn0011581, FBgn0013767, FBgn0014396, FBgn0016076, FBgn0017561, FBgn0023076, FBgn0025391, FBgn0032336, FBgn0039938, FBgn0045038, FBgn0051665, FBgn0262593	eag, for, Egfr, up, Ggamma1, spi, Ms, Crz, tim, vri, Ork1, Clk, Scgdelta, AstC, Sox102F, Proc, wry, Shab	Biological_pathways	Up- and donw-regulated genes
GO:0003015	heart process	38	18	12.24	0.03614	FBgn0000535, FBgn0000721, FBgn0003731, FBgn0004169, FBgn0004921, FBgn0005672, FBgn0011581, FBgn0013767, FBgn0014396, FBgn0016076, FBgn0017561, FBgn0023076, FBgn0025391, FBgn0032336, FBgn0039938, FBgn0045038, FBgn0051665, FBgn0262593	eag, for, Egfr, up, Ggamma1, spi, Ms, Crz, tim, vri, Ork1, Clk, Scgdelta, AstC, Sox102F, Proc, wry, Shab	Biological_pathways	Up- and donw-regulated genes
GO:0007472	wing disc morphogenesis	244	92	78.56	0.03675	FBgn0000179, FBgn0000180, FBgn0000273, FBgn0000289, FBgn0000395, FBgn0000547, FBgn0000711, FBgn0001075, FBgn0001083, FBgn0001235, FBgn0001319, FBgn0001987, FBgn0002643, FBgn0002931, FBgn0003090, FBgn0003118, FBgn0003371, FBgn0003447, FBgn0003463, FBgn0003731, FBgn0004198, FBgn0004390, FBgn0004395, FBgn0004607, FBgn0004638, FBgn0004647, FBgn0004648, FBgn0005536, FBgn0005672, FBgn0010313, FBgn00104…	bi, bib, Pka-C1, cg, cv-2, ed, flw, ft, fw, hth, kn, Gli, mam, net, pk, pnt, sgg, sn, sog, Egfr, ct, RasGAP1, unk, zfh2, drk, N, svr, Mbs, spi, corto, Fkbp14, fbl, heph, tsr, Chi, mirr, sty, SMC3, vri, spen, sfl, dve, crol, pio, RhoGEF2, EloB, brk, Actbeta, CG13366, msk, Axn, CG6191, Hs3st-B, daw, Wnt6, scaf, wmd, slow, path, MYPT-75D, Mkp3, Grasp65, ATP6AP2, smp-30, Usp8, EloA, tnc, Gclc, Bap170…	Biological_pathways	Up- and donw-regulated genes
GO:0060341	regulation of cellular localization	122	55	39.28	0.03675	FBgn0000017, FBgn0000181, FBgn0000273, FBgn0001308, FBgn0002044, FBgn0002121, FBgn0002525, FBgn0002638, FBgn0003321, FBgn0003371, FBgn0004574, FBgn0004595, FBgn0004636, FBgn0005586, FBgn0010300, FBgn0010660, FBgn0013759, FBgn0014396, FBgn0015589, FBgn0015622, FBgn0015790, FBgn0015799, FBgn0016034, FBgn0016975, FBgn0020497, FBgn0021761, FBgn0024921, FBgn0026192, FBgn0026207, FBgn0026401, FBgn00275…	Abl, bic, Pka-C1, Khc, swm, l(2)gl, Lam, Rcc1, sbr, sgg, Rop, pros, Rap1, Rab3, brat, Nup214, CASK, tim, Apc, Cnx99A, Rab11, Rbf, mael, stnB, emb, Nup154, Tnpo, par-6, mbo, Nipped-B, GABA-B-R2, Syt4, Frq1, twit, wash, ReepB, Lrrk, CG7956, Sar1, Nrx-1, Nup358, cpx, Lasp, Dys, par-1, TER94, Exn, sdt, Sec23, Mi-2, Ih, dally, rdx, Fife, smt3	Biological_pathways	Up- and donw-regulated genes
GO:0090287	regulation of cellular response to growth factor stimulus	46	21	14.81	0.0384	FBgn0000395, FBgn0001942, FBgn0003463, FBgn0004390, FBgn0014388, FBgn0015754, FBgn0024250, FBgn0029006, FBgn0030600, FBgn0032956, FBgn0033438, FBgn0037015, FBgn0043364, FBgn0086676, FBgn0262169, FBgn0262733, FBgn0263593, FBgn0263930, FBgn0265048, FBgn0265974, FBgn0266420	cv-2, eIF4A, sog, RasGAP1, sty, Lis-1, brk, Smurf, hiw, Cul2, Mmp2, cmpy, cbt, spin, magu, Src64B, Lpin, dally, cv-d, ttv, Ote	Biological_pathways	Up- and donw-regulated genes
GO:1902692	regulation of neuroblast proliferation	46	21	14.81	0.0384	FBgn0002121, FBgn0003118, FBgn0004595, FBgn0004647, FBgn0004889, FBgn0010300, FBgn0013469, FBgn0015805, FBgn0019624, FBgn0023388, FBgn0024913, FBgn0025463, FBgn0030733, FBgn0031375, FBgn0031461, FBgn0032833, FBgn0035205, FBgn0035754, FBgn0037891, FBgn0040773, FBgn0259789	l(2)gl, pnt, pros, N, tws, brat, klu, HDAC1, COX5A, Dap160, Actbeta, Bap60, UQCR-14, erm, daw, COX4, Ctr9, MED4, CG5214, COX7C, zld	Biological_pathways	Up- and donw-regulated genes
GO:0030952	establishment or maintenance of cytoskeleton polarity	46	21	14.81	0.0384	FBgn0000163, FBgn0000273, FBgn0001308, FBgn0002121, FBgn0003090, FBgn0004380, FBgn0004381, FBgn0004907, FBgn0004921, FBgn0011224, FBgn0015589, FBgn0015790, FBgn0016034, FBgn0021760, FBgn0027948, FBgn0031006, FBgn0033935, FBgn0259243, FBgn0260934, FBgn0261458, FBgn0261574	baz, Pka-C1, Khc, l(2)gl, pk, Klp64D, Klp68D, 14-3-3zeta, Ggamma1, heph, Apc, Rab11, mael, chb, msps, rictor, Sin1, Pka-R1, par-1, capt, kug	Biological_pathways	Up- and donw-regulated genes
GO:0072599	establishment of protein localization to endoplasmic reticulum	19	14	6.12	0.03859	FBgn0010391, FBgn0010638, FBgn0010747, FBgn0011584, FBgn0015298, FBgn0025700, FBgn0030306, FBgn0032640, FBgn0035771, FBgn0035947, FBgn0036300, FBgn0038810, FBgn0040623, FBgn0086357	Gtp-bp, Sec61beta, Srp54k, Trp1, Srp19, CG5885, Spase25, Sgt, Sec63, Srp68, Pmm2, Srp72, Spase12, Sec61alpha	Biological_pathways	Up- and donw-regulated genes
GO:0099537	trans-synaptic signaling	262	104	84.36	0.03894	FBgn0000017, FBgn0000024, FBgn0000036, FBgn0000037, FBgn0000261, FBgn0000273, FBgn0000346, FBgn0001134, FBgn0001987, FBgn0002121, FBgn0002921, FBgn0003380, FBgn0003429, FBgn0003462, FBgn0003651, FBgn0004244, FBgn0004449, FBgn0004573, FBgn0004574, FBgn0004575, FBgn0004580, FBgn0004611, FBgn0004622, FBgn0004636, FBgn0004868, FBgn0005564, FBgn0005586, FBgn0010015, FBgn0010348, FBgn0010379, FBgn00103…	Abl, Ace, nAChRalpha1, mAChR-A, Cat, Pka-C1, comt, Grd, Gli, l(2)gl, Atpalpha, Sh, slo, Sod1, svp, Rdl, Ten-m, 5-HT7, Rop, Syn, Cbp53E, Plc21C, TkR99D, Rap1, Gdi, Shal, Rab3, CanA1, Arf79F, Akt1, Nmdar1, Snap25, Dop1R1, Sap47, CASK, Gycbeta100B, nAChRalpha3, Ipp, stnB, mGluR, chico, Oamb, GluClalpha, Tip60, HDAC6, Eaat1, Manf, GABA-B-R2, Syt4, NtR, Pink1, CG8916, Frq1, wgn, nAChRbeta3, VGlut, Nlg…	Biological_pathways	Up- and donw-regulated genes
GO:0022625	cytosolic large ribosomal subunit	50	39	15.74	1.5e-11	FBgn0002579, FBgn0002626, FBgn0003274, FBgn0003279, FBgn0003941, FBgn0005593, FBgn0010078, FBgn0010409, FBgn0011272, FBgn0013325, FBgn0014026, FBgn0015288, FBgn0015756, FBgn0016726, FBgn0017579, FBgn0020910, FBgn0023170, FBgn0024733, FBgn0029785, FBgn0029897, FBgn0030616, FBgn0030878, FBgn0031980, FBgn0032050, FBgn0032518, FBgn0032987, FBgn0034968, FBgn0035422, FBgn0035753, FBgn0036213, FBgn00368…	RpL36, RpL32, RpLP2, RpL4, RpL40, RpL7, RpL23, RpL18A, RpL13, RpL11, RpL7A, RpL22, RpL9, RpL29, RpL14, RpL3, RpL39, RpL10, RpL35, RpL17, RpL37a, CG6769, RpL36A, CG13096, RpL24, RpL21, RpL12, RpL28, RpL18, RpL10Ab, RpL26, RpL35A, RpL13A, RpL34b, RpL27, RpL6, RpL5, RpL30, RpL8	Cellular_compartment	Up- and donw-regulated genes
GO:0005615	extracellular space	307	143	96.64	1e-08	FBgn0000299, FBgn0000500, FBgn0000592, FBgn0001218, FBgn0001257, FBgn0003463, FBgn0004045, FBgn0004047, FBgn0004629, FBgn0004648, FBgn0005391, FBgn0005672, FBgn0010385, FBgn0010452, FBgn0010470, FBgn0011581, FBgn0012344, FBgn0013767, FBgn0013770, FBgn0014002, FBgn0014135, FBgn0014391, FBgn0016075, FBgn0023178, FBgn0023179, FBgn0023529, FBgn0024293, FBgn0024913, FBgn0025456, FBgn0025827, FBgn00260…	Col4a1, Dsk, Est-6, Hsc70-3, ImpL2, sog, Yp1, Yp3, Cys, svr, Yp2, spi, Def, trn, Fkbp14, Ms, Dh44, Crz, Cp1, Pdi, bnl, sun, vkg, Pdf, amon, CG2918, Spn43Ab, Actbeta, CREG, CG6421, Mipp1, SPARC, TyrRS, Manf, CG4757, CG5867, Hug, TotA, Lk, Spn55B, CG16756, regucalcin, CtsB1, CG4678, CG5162, Ggt-1, CG3662, Npc2a, eys, daw, IM33, CG10031, obst-E, Wnt6, Spn28Dc, Dh31, Apoltp, AstC, sNPF, CheB38c, scaf…	Cellular_compartment	Up- and donw-regulated genes
GO:0022627	cytosolic small ribosomal subunit	38	29	11.96	1.6e-08	FBgn0002590, FBgn0002622, FBgn0003517, FBgn0003941, FBgn0003942, FBgn0004867, FBgn0005533, FBgn0010265, FBgn0010408, FBgn0010411, FBgn0010412, FBgn0011284, FBgn0015521, FBgn0017545, FBgn0020618, FBgn0030136, FBgn0033699, FBgn0033912, FBgn0034138, FBgn0034743, FBgn0038834, FBgn0039713, FBgn0039757, FBgn0041588, FBgn0086472, FBgn0261592, FBgn0261596, FBgn0261597, FBgn0261599	RpS5a, RpS3, sta, RpL40, RpS27A, RpS2, RpS17, RpS13, RpS9, RpS18, RpS19a, RpS4, RpS21, RpS3A, Rack1, RpS28b, RpS11, RpS23, RpS15, RpS16, RpS30, RpS8, RpS7, eIF2D, RpS25, RpS6, RpS24, RpS26, RpS29	Cellular_compartment	Up- and donw-regulated genes
GO:0005839	proteasome core complex	13	13	4.09	2.9e-07	FBgn0002284, FBgn0004066, FBgn0010590, FBgn0016697, FBgn0023174, FBgn0023175, FBgn0026380, FBgn0029134, FBgn0032596, FBgn0086134, FBgn0250746, FBgn0250843, FBgn0261394	Prosbeta6, Prosalpha4, Prosbeta1, Prosalpha5, Prosbeta2, Prosalpha7, Prosbeta3, Prosbeta5, Prosbeta4, Prosalpha2, Prosbeta7, Prosalpha6, Prosalpha3	Cellular_compartment	Up- and donw-regulated genes
GO:0005829	cytosol	671	292	211.21	2.2e-05	FBgn0000017, FBgn0000053, FBgn0000116, FBgn0000181, FBgn0000273, FBgn0000286, FBgn0000414, FBgn0000579, FBgn0000721, FBgn0001091, FBgn0001092, FBgn0001098, FBgn0001124, FBgn0001128, FBgn0001186, FBgn0001187, FBgn0001230, FBgn0001233, FBgn0001235, FBgn0001248, FBgn0001942, FBgn0002121, FBgn0002579, FBgn0002590, FBgn0002622, FBgn0002626, FBgn0002719, FBgn0002772, FBgn0003067, FBgn0003071, FBgn00031…	Abl, Gart, Argk, bic, Pka-C1, Cf2, Dab, Eno, for, Gapdh1, Gapdh2, Gdh, Got1, Gpdh1, Hex-A, Hex-C, Hsp68, Hsp83, hth, Idh, eIF4A, l(2)gl, RpL36, RpS5a, RpS3, RpL32, Men, Mlc1, Pepck1, Pfk, r, RpLP2, RpL4, sgg, Sod1, sta, Tm1, RpL40, RpS27A, Cyp1, Gad1, Rop, Cbp53E, Pgd, Xpc, RpS2, Gdi, tws, Sam-S, RpS17, RpL7, Vha55, RpL23, RpS13, brat, Akt1, RpS9, RpL18A, RpS18, RpS19a, CCT5, Srp54k, fbl, heph, R…	Cellular_compartment	Up- and donw-regulated genes
GO:0005887	integral component of plasma membrane	331	144	104.19	2.2e-05	FBgn0000036, FBgn0000037, FBgn0000535, FBgn0000547, FBgn0001075, FBgn0001134, FBgn0001296, FBgn0001987, FBgn0002921, FBgn0002940, FBgn0003218, FBgn0003255, FBgn0003380, FBgn0003731, FBgn0003861, FBgn0004244, FBgn0004449, FBgn0004512, FBgn0004573, FBgn0004619, FBgn0004622, FBgn0004647, FBgn0004852, FBgn0005564, FBgn0010197, FBgn0010399, FBgn0010435, FBgn0010473, FBgn0011582, FBgn0011589, FBgn00116…	nAChRalpha1, mAChR-A, eag, ed, ft, Grd, kar, Gli, Atpalpha, ninaE, rdgB, rk, Sh, Egfr, trp, Rdl, Ten-m, Mdr49, 5-HT7, GluRIA, TkR99D, N, Ac76E, Shal, Gyc32E, Nmdar1, emp, tutl, Dop1R1, Elk, Mvl, Esp, Rh5, Tie, drl, kek2, nAChRalpha3, CadN, nrv2, Lgr1, fz2, Ork1, mGluR, Ac13E, Ac3, Ac78C, stan, Oamb, GluClalpha, AkhR, PlexA, GABA-B-R2, kek3, Nckx30C, NtR, Tsp42Ed, NAAT1, CG8916, dpr18, wgn, nAChRb…	Cellular_compartment	Up- and donw-regulated genes
GO:0005753	mitochondrial proton-transporting ATP synthase complex	15	12	4.72	0.00015	FBgn0010217, FBgn0011211, FBgn0014391, FBgn0016119, FBgn0016120, FBgn0016691, FBgn0019644, FBgn0020235, FBgn0035032, FBgn0038224, FBgn0039830, FBgn0083167	ATPsynbeta, blw, sun, ATPsynCF6, ATPsynD, ATPsynO, ATPsynB, ATPsyngamma, ATPsynF, ATPsynE, ATPsynC, Neb-cGP	Cellular_compartment	Up- and donw-regulated genes
GO:0009897	external side of plasma membrane	13	10	4.09	0.00099	FBgn0026061, FBgn0027843, FBgn0032116, FBgn0033438, FBgn0034476, FBgn0036317, FBgn0037671, FBgn0262473, FBgn0262869, FBgn0263930	Mipp1, CAH2, Mco1, Mmp2, Toll-7, CG10948, ATP6AP2, Tl, Gfrl, dally	Cellular_compartment	Up- and donw-regulated genes
GO:0008328	ionotropic glutamate receptor complex	13	10	4.09	0.00099	FBgn0004619, FBgn0010399, FBgn0031634, FBgn0036937, FBgn0040752, FBgn0053513, FBgn0064123, FBgn0263289, FBgn0264000, FBgn0265416	GluRIA, Nmdar1, Ir25a, Ir76b, Prosap, Nmdar2, stg1, scrib, GluRIB, Neto	Cellular_compartment	Up- and donw-regulated genes
GO:0005576	extracellular region	526	234	165.57	0.00135	FBgn0000108, FBgn0000116, FBgn0000299, FBgn0000395, FBgn0000500, FBgn0000592, FBgn0001218, FBgn0001257, FBgn0002121, FBgn0003137, FBgn0003371, FBgn0003463, FBgn0004045, FBgn0004047, FBgn0004449, FBgn0004629, FBgn0004648, FBgn0004907, FBgn0005391, FBgn0005664, FBgn0005672, FBgn0010114, FBgn0010385, FBgn0010452, FBgn0010470, FBgn0011280, FBgn0011282, FBgn0011283, FBgn0011581, FBgn0011695, FBgn00117…	Appl, Argk, Col4a1, cv-2, Dsk, Est-6, Hsc70-3, ImpL2, l(2)gl, Ppn, sgg, sog, Yp1, Yp3, Ten-m, Cys, svr, 14-3-3zeta, Yp2, Crys, spi, hig, Def, trn, Fkbp14, Obp19d, Obp84a, Obp28a, Ms, EbpIII, Tig, Dh44, pnut, Crz, Cp1, Pdi, bnl, sun, Fer1HCH, NetB, lama, vkg, Idgf1, chb, Pdf, amon, CG2918, Spn43Ab, Actbeta, CREG, IM2, CG6421, Mipp1, Ndg, SPARC, TyrRS, Manf, NPF, miple1, mino, CG4757, CG5867, GCS2a…	Cellular_compartment	Up- and donw-regulated genes
GO:0045277	respiratory chain complex IV	10	8	3.15	0.00224	FBgn0015031, FBgn0019624, FBgn0031066, FBgn0032833, FBgn0034877, FBgn0040529, FBgn0040773, FBgn0263911	cype, COX5A, COX6B, COX4, levy, COX7A, COX7C, COX8	Cellular_compartment	Up- and donw-regulated genes
GO:0016471	vacuolar proton-transporting V-type ATPase complex	10	8	3.15	0.00224	FBgn0005671, FBgn0022097, FBgn0027779, FBgn0028670, FBgn0028671, FBgn0037671, FBgn0262511, FBgn0263598	Vha55, Vha36-1, VhaSFD, Vha100-2, Vha100-1, ATP6AP2, Vha44, Vha68-2	Cellular_compartment	Up- and donw-regulated genes
GO:0033178	proton-transporting two-sector ATPase complex, catalytic domain	16	11	5.04	0.00239	FBgn0005671, FBgn0010217, FBgn0011211, FBgn0014391, FBgn0016119, FBgn0016691, FBgn0020235, FBgn0022097, FBgn0027779, FBgn0262511, FBgn0263598	Vha55, ATPsynbeta, blw, sun, ATPsynCF6, ATPsynO, ATPsyngamma, Vha36-1, VhaSFD, Vha44, Vha68-2	Cellular_compartment	Up- and donw-regulated genes
GO:0033177	proton-transporting two-sector ATPase complex, proton-transporting domain	14	10	4.41	0.00248	FBgn0016119, FBgn0016120, FBgn0019644, FBgn0028662, FBgn0028670, FBgn0028671, FBgn0035032, FBgn0038224, FBgn0039830, FBgn0262736	ATPsynCF6, ATPsynD, ATPsynB, VhaPPA1-1, Vha100-2, Vha100-1, ATPsynF, ATPsynE, ATPsynC, Vha16-1	Cellular_compartment	Up- and donw-regulated genes
GO:0048786	presynaptic active zone	25	15	7.87	0.00297	FBgn0005586, FBgn0013973, FBgn0016975, FBgn0038837, FBgn0039883, FBgn0041605, FBgn0043362, FBgn0046704, FBgn0053547, FBgn0259246, FBgn0261041, FBgn0262483, FBgn0264606, FBgn0264607, FBgn0267001	Rab3, Gycbeta100B, stnB, KaiR1D, RhoGAP100F, cpx, bchs, Liprin-alpha, Rim, brp, stj, Rbp, Fife, CaMKII, Ten-a	Cellular_compartment	Up- and donw-regulated genes
GO:0043005	neuron projection	279	109	87.82	0.00365	FBgn0000017, FBgn0000036, FBgn0000037, FBgn0000273, FBgn0000346, FBgn0000414, FBgn0001134, FBgn0001257, FBgn0001308, FBgn0002917, FBgn0003371, FBgn0003429, FBgn0003447, FBgn0004244, FBgn0004370, FBgn0004573, FBgn0004574, FBgn0004575, FBgn0004580, FBgn0004882, FBgn0005626, FBgn0005775, FBgn0010414, FBgn0010473, FBgn0011288, FBgn0011582, FBgn0013759, FBgn0015218, FBgn0015380, FBgn0015519, FBgn00155…	Abl, nAChRalpha1, mAChR-A, Pka-C1, comt, Dab, Grd, ImpL2, Khc, na, sgg, slo, sn, Rdl, Ptp10D, 5-HT7, Rop, Syn, Cbp53E, orb, ple, Con, SerT, tutl, Snap25, Dop1R1, CASK, eIF4E1, drl, nAChRalpha3, Apc, CadN, Lis-1, Nak, NetB, nrv2, Rab11, klg, chb, Pdf, amon, Oamb, GluClalpha, par-6, gukh, Eaat1, Cdk5alpha, blot, Syt4, Nab2, NtR, SK, Lrp4, CG8916, dpr18, nAChRbeta3, erm, Ir25a, CG13793, CG13795, PIC…	Cellular_compartment	Up- and donw-regulated genes
GO:0009986	cell surface	48	29	15.11	0.00403	FBgn0000547, FBgn0001233, FBgn0001987, FBgn0004647, FBgn0005775, FBgn0015737, FBgn0026061, FBgn0027843, FBgn0030941, FBgn0031414, FBgn0031866, FBgn0032116, FBgn0033438, FBgn0034476, FBgn0034511, FBgn0034972, FBgn0035539, FBgn0036317, FBgn0037671, FBgn0040321, FBgn0043791, FBgn0051146, FBgn0051665, FBgn0083963, FBgn0083975, FBgn0243514, FBgn0262473, FBgn0262869, FBgn0263930	ed, Hsp83, Gli, N, Con, Hmu, Mipp1, CAH2, wgn, eys, Nlg2, Mco1, Mmp2, Toll-7, GNBP-like3, CG10339, slow, CG10948, ATP6AP2, GNBP3, phu, Nlg1, wry, Nlg3, Nlg4, eater, Tl, Gfrl, dally	Cellular_compartment	Up- and donw-regulated genes
GO:0005886	plasma membrane	932	363	293.37	0.00422	FBgn0000017, FBgn0000024, FBgn0000036, FBgn0000037, FBgn0000044, FBgn0000108, FBgn0000116, FBgn0000150, FBgn0000163, FBgn0000180, FBgn0000241, FBgn0000273, FBgn0000535, FBgn0000547, FBgn0000579, FBgn0000721, FBgn0001075, FBgn0001134, FBgn0001233, FBgn0001247, FBgn0001257, FBgn0001296, FBgn0001987, FBgn0002121, FBgn0002921, FBgn0002938, FBgn0002940, FBgn0003090, FBgn0003091, FBgn0003093, FBgn00032…	Abl, Ace, nAChRalpha1, mAChR-A, Act57B, Appl, Argk, awd, baz, bib, bw, Pka-C1, eag, ed, Eno, for, ft, Grd, Hsp83, Ide, ImpL2, kar, Gli, l(2)gl, Atpalpha, ninaC, ninaE, pk, Pkc53E, Pkc98E, rdgB, rk, Sh, slo, st, sws, Egfr, trp, uzip, kst, Rdl, 18w, Klp64D, RasGAP1, Ten-m, Mdr49, 5-HT7, pros, GluRIA, TkR99D, Gbeta76C, Rap1, drk, ogre, N, Ac76E, 14-3-3zeta, Eip63F-1, Ggamma1, Shal, Rab3, Vha55, Con,…	Cellular_compartment	Up- and donw-regulated genes
GO:0045169	fusome	28	16	8.81	0.00429	FBgn0003371, FBgn0013770, FBgn0014002, FBgn0015222, FBgn0015790, FBgn0019925, FBgn0021760, FBgn0027579, FBgn0028327, FBgn0035771, FBgn0086357, FBgn0250789, FBgn0260934, FBgn0261014, FBgn0262736, FBgn0263289	sgg, Cp1, Pdi, Fer1HCH, Rab11, Surf4, chb, mino, l(1)G0320, Sec63, Sec61alpha, alpha-Spec, par-1, TER94, Vha16-1, scrib	Cellular_compartment	Up- and donw-regulated genes
GO:0005604	basement membrane	17	11	5.35	0.00486	FBgn0000299, FBgn0003137, FBgn0011722, FBgn0015774, FBgn0016075, FBgn0026403, FBgn0034070, FBgn0259244, FBgn0260660, FBgn0261800, FBgn0267348	Col4a1, Ppn, Tig, NetB, vkg, Ndg, SP2353, CG42342, Mp, LanB1, LanB2	Cellular_compartment	Up- and donw-regulated genes
GO:0033181	plasma membrane proton-transporting V-type ATPase complex	12	8	3.78	0.01291	FBgn0005671, FBgn0022097, FBgn0027779, FBgn0028662, FBgn0028670, FBgn0262511, FBgn0262736, FBgn0263598	Vha55, Vha36-1, VhaSFD, VhaPPA1-1, Vha100-2, Vha44, Vha16-1, Vha68-2	Cellular_compartment	Up- and donw-regulated genes
GO:0044449	contractile fiber part	64	29	20.15	0.01361	FBgn0001091, FBgn0001128, FBgn0002772, FBgn0003149, FBgn0003721, FBgn0004169, FBgn0011296, FBgn0014869, FBgn0023540, FBgn0025391, FBgn0026059, FBgn0027556, FBgn0031692, FBgn0032683, FBgn0033926, FBgn0035410, FBgn0035499, FBgn0063485, FBgn0086355, FBgn0250906, FBgn0259209, FBgn0259219, FBgn0260442, FBgn0261836, FBgn0263846, FBgn0264489, FBgn0265434, FBgn0265487, FBgn0266599	Gapdh1, Gpdh1, Mlc1, Prm, Tm1, up, l(2)efl, Pglym78, CG3630, Scgdelta, Mhcl, CG4928, TpnC25D, kon, Arc1, CG14964, Chd64, Lasp, Tpi, Pgk, Mlp60A, CG42319, rhea, Msp300, CG43707, CG43897, zip, mbl, Hsc70-4	Cellular_compartment	Up- and donw-regulated genes
GO:0098533	ATPase dependent transmembrane transport complex	10	7	3.15	0.01401	FBgn0002921, FBgn0004512, FBgn0015777, FBgn0031734, FBgn0032946, FBgn0035695, FBgn0039594	Atpalpha, Mdr49, nrv2, CG11147, nrv3, CG10226, snu	Cellular_compartment	Up- and donw-regulated genes
GO:0099081	supramolecular polymer	141	57	44.38	0.01442	FBgn0000150, FBgn0000283, FBgn0000299, FBgn0001091, FBgn0001128, FBgn0001308, FBgn0002525, FBgn0002772, FBgn0003149, FBgn0003721, FBgn0003885, FBgn0003888, FBgn0003890, FBgn0004117, FBgn0004167, FBgn0004169, FBgn0004380, FBgn0004381, FBgn0011296, FBgn0011661, FBgn0014869, FBgn0015589, FBgn0015754, FBgn0016075, FBgn0019968, FBgn0021760, FBgn0023540, FBgn0024238, FBgn0025391, FBgn0025633, FBgn00260…	awd, Cp190, Col4a1, Gapdh1, Gpdh1, Khc, Lam, Mlc1, Prm, Tm1, alphaTub84D, betaTub60D, betaTub97EF, Tm2, kst, up, Klp64D, Klp68D, l(2)efl, Moe, Pglym78, Apc, Lis-1, vkg, Khc-73, chb, CG3630, Fim, Scgdelta, CG13366, Mhcl, tacc, CG4928, msps, TpnC25D, CG14535, Ttc30, kon, Arc1, CG14964, Chd64, Kif19A, Lasp, Tpi, Pgk, Mlp60A, CG42319, rhea, Msp300, Patronin, CG43707, CG43897, zip, mbl, tau, Hsc70-4, …	Cellular_compartment	Up- and donw-regulated genes
GO:0034703	cation channel complex	41	20	12.91	0.01514	FBgn0000535, FBgn0003380, FBgn0003861, FBgn0004619, FBgn0005564, FBgn0010399, FBgn0011589, FBgn0017561, FBgn0031634, FBgn0036937, FBgn0062440, FBgn0064123, FBgn0085434, FBgn0259145, FBgn0261999, FBgn0262593, FBgn0263257, FBgn0264000, FBgn0264386, FBgn0265194	eag, Sh, trp, GluRIA, Shal, Nmdar1, Elk, Ork1, Ir25a, Ir76b, EMRE, stg1, NaCP60E, CG42260, Ca-Ma2d, Shab, Cngl, GluRIB, Ca-alpha1T, Trpm	Cellular_compartment	Up- and donw-regulated genes
[truncated: 116 more rows]
