# Supplementary material for: Enhanced insulin signalling ameliorates C9orf72 hexanucleotide repeat expansion toxicity in Drosophila
Source: eLife journal article supplement (doi:10.7554/elife.58565), 2021-03-19
Supplement: supp [file elife-58565-supp-v1.zip › elife_poa_e58565_Figure_1_source_data_2.xlsx]

## Sheet: Sheet1
Figure 1 - source data 2	Related to figure 1B
Sample	Ct mean dilp2	Ct mean dilp3	Ct mean dilp5	Ct mean tubulin	Delta Ct	2^-DCT dilp2	Delta CT dilp3	2^-DCT dilp3	Delta CT dilp3	2^-DCT dilp3
ELAVGS>GR100 Ru- 1	21.94	24.55	23.35	25.49	-3.55	11.7127	-0.94	1.91853	-2.14	4.40762
ELAVGS>GR100 Ru- 2	22.78	25.2	23.94	26.01	-3.23	9.38268	-0.81	1.75321	-2.07	4.19887
ELAVGS>GR100 Ru- 3	22.3	24.73	23.47	25.63	-3.33	10.0561	-0.9	1.86607	-2.16	4.46915
ELAVGS>GR100 R+ 5	25.92	32.98	27.51	27.43	-1.51	2.8481	5.55	0.0213444	0.08	0.946058
ELAVGS>GR100 Ru+ 6	24.98	31.13	26.78	26.17	-1.19	2.28153	4.96	0.0321286	0.61	0.655197
ELAVGS>GR100 Ru+ 7	25.02	31.52	27.08	25.93	-0.91	1.87905	5.59	0.0207607	1.15	0.450625
GraphPad prism 6
Table Analyzed	dilp2 Gr100			Table Analyzed	dilp3 Gr100			Table Analyzed	dilp 5 Gr100
Column B	Induced			Column B	Induced			Column B	Induced
vs.	vs.			vs.	vs.			vs.	vs.
Column A	Uninduced			Column A	Uninduced			Column A	Uninduced
Unpaired t test				Unpaired t test				Unpaired t test
P value	0.0004			P value	< 0.0001			P value	< 0.0001
								P value summary	****
Significantly different? (P < 0.05)	Yes			Significantly different? (P < 0.05)	Yes			Significantly different? (P < 0.05)	Yes
One- or two-tailed P value?	Two-tailed			One- or two-tailed P value?	Two-tailed			One- or two-tailed P value?	Two-tailed
t, df	t=10.76 df=4			t, df	t=37.23 df=4			t, df	t=21.53 df=4
Mean	10.38	2.336		Mean	1.846	0.02474		Mean	4.349	0.684
Std. Deviation	1.2	0.4868		Std. Deviation	0.08448	0.006401		Std. Deviation	0.1581	0.249
Std. Error of Mean	0.6929	0.2811		Std. Error of Mean	0.04877	0.003696		Std. Error of Mean	0.09125	0.1437
Lower 95% CI of mean	7.401	1.127		Lower 95% CI of mean	1.636	0.008843		Lower 95% CI of mean	3.956	0.0655
Upper 95% CI of mean	13.36	3.546		Upper 95% CI of mean	2.056	0.04065		Upper 95% CI of mean	4.742	1.302
