# Supplementary material for: Enhanced insulin signalling ameliorates C9orf72 hexanucleotide repeat expansion toxicity in Drosophila
Source: eLife journal article supplement (doi:10.7554/elife.58565), 2021-03-19
Supplement: supp [file elife-58565-supp-v1.zip › elife_poa_e58565_Figure_2_figure_supplement_1_source_data_1.xlsx]

## Sheet: cumulative food intake data
Day 1									Day 2									Day 3
		Ru-	Ru+	Ru-	Ru+	Ru-	Ru+				Ru-	Ru+	Ru-	Ru+	Ru-	Ru+				Ru-	Ru+	Ru-	Ru+	Ru-	Ru+
2018-09-12	Empty	(G4C2)36/+		(G4C2)36/InRActive		(G4C2)36/InRDN			2018-09-13	Empty	(G4C2)36/+		(G4C2)36/InRActive		(G4C2)36/InRDN			2018-09-14	Empty	36RElavGS x w1118		36RElavGS x UASInRActive		36RElavGS x UASInRDN
1	0.6	1	0.8	1.3	1	1.2	0.4		1	0	2.8	1.4	1.1	0.7	1.2	0.5		1	0	0	0.9	1.2	0.3	0.3	0.4
2	0.6	1.4	0.8	2.6		0	1.9		2	0.6	1.6	1.3	0.7		0.3	0.5		2	0.2	0.8	1.3	0		0.4	0.3
3	0	1.1	0.8	0.4	1	0.4	0.6		3	0.6	1.4	1.3	0.9	1	1.6	0.8		3	0	0.8	0.8	0.5	0.6	1.2	0.6
4		0.3	1.1	0.1	0.5	0.5			4		0.2	0.1	0	0.6	0.8			4		0.9	0.2	0	1	0.5
5		0.3	0.5	0.8	0.8	0.8	0.7		5		1	0.8	1.2	1.4	2.5	1.7		5		0.5	0.9	0	0.7	0	0.1
6		0.5			0.7	0.8	1.4		6		1.1			0.3	1.3	1		6		0.8			0.1	0.6	0.1
7		0.4	1	0.5	0.7	0.8			7		0.3	0.6	0.2	1.1	1			7		0.2	0	0.4	0.8	0.7
8		1.8	0.9	0.4	0.4	0.7	1		8		1.1	0.8	0.7	1.1	0.7	1.9		8		0.7	0.4	0.8	0.8	0.7	0.5
Average	0.4	0.85	0.842857	0.871429	0.728571	0.65	1		Average	0.4	1.1875	0.9	0.685714	0.885714	1.175	1.06667		Average	0.0666667	0.5875	0.642857	0.414286	0.614286	0.55	0.333333
Corrected		0.45	0.442857	0.471429	0.328571	0.25	0.6		Corrected		0.7875	0.5	0.285714	0.485714	0.775	0.666667		Corrected		0.520833	0.57619	0.347619	0.547619	0.483333	0.266667
SEM		0.199105	0.0719032	0.321984	0.0865043	0.125357	0.229492		SEM		0.2875	0.177281	0.168224	0.140456	0.23585	0.245855		SEM		0.115631	0.173009	0.175158	0.118379	0.123924	0.0843274
T-test	ru-/ru+	0.975	ns	0.6759	ns	0.1779	ns		T-test									T-test
Day 2+3									Day 3+4
		Ru-	Ru+	Ru-	Ru+	Ru-	Ru+				Ru-	Ru+	Ru-	Ru+	Ru-	Ru+
2018-08-06	Empty	(G4C2)36/+		(G4C2)36/InRActive		(G4C2)36/InRDN			2018-08-06	Empty	(G4C2)36/+		(G4C2)36/InRActive		(G4C2)36/InRDN
1	0.6	3.8	2.2	2.4	1.7	2.4	0.9		1	0.6	3.8	3.1	3.6	2	2.7	1.3
2	1.2	3	2.1	3.3		0.3	2.4		2	1.4	3.8	3.4	3.3		0.7	2.7
3	0.6	2.5	2.1	1.3	2	2	1.4		3	0.6	3.3	2.9	1.8	2.6	3.2	2
4		0.5	1.2	0.1	1.1	1.3			4		1.4	1.4	0.1	2.1	1.8
5		1.3	1.3	2	2.2	3.3	2.4		5		1.8	2.2	2	2.9	3.3	2.5
6		1.6			1	2.1	2.4		6		2.4			1.1	2.7	2.5
7		0.7	1.6	0.7	1.8	1.8			7		0.9	1.6	1.1	2.6	2.5
8		2.9	1.7	1.1	1.5	1.4	2.9		8		3.6	2.1	1.9	2.3	2.1	3.4
Average	0.8	2.0375	1.74286	1.55714	1.63333	1.825	2.06667		Average	0.866667	2.625	2.38571	1.97143	2.22857	2.375	2.4
Corrected		1.2375	0.942857	0.757143	0.833333	1.025	1.26667		Corrected		1.75833	1.51905	1.10476	1.3619	1.50833	1.53333
SEM		0.420007	0.15253	0.410492	0.168224	0.310386	0.307318		SEM		0.409159	0.289028	0.455503	0.222234	0.298059	0.287518
T-test	ru-/ru+	0.544	ns	0.899	ns	0.5988	ns		T-test		0.65	ns	0.6211	ns	0.9541	ns
Day	(G2C4)36/+ uninduced		(G2C4)36/+ induced		(G2C4)36/InRActive uninduced		(G2C4)36/InRActive induced		(G2C4)36/InRDNuninduced		(G2C4)36/InRDNinduced
	Mean	SEM	Mean	SEM	Mean	SEM	Mean	SEM	Mean	SEM	Mean	SEM
Day 1	0.45	0.199105	0.442857	0.071903	0.471429	0.321984	0.328571	0.086504	0.25	0.125357	0.6	0.229492
Day 2	1.2375	0.420007	0.942857	0.15253	0.757143	0.410492	0.833333	0.168224	1.025	0.310386	1.26667	0.307318
Day 3	1.75833	0.409159	1.51905	0.289028	1.10476	0.455503	1.3619	0.222234	1.50833	0.298059	1.53333	0.287518
								No differences across genotypes day 1, 2, 3
								One way ANOVA	day 3
								P value	0.8373
								One way ANOVA	day 2
								P value	0.8307
								One way ANOVA	day 1
								P value	0.8479
