# Supplementary material for: Enhanced insulin signalling ameliorates C9orf72 hexanucleotide repeat expansion toxicity in Drosophila
Source: eLife journal article supplement (doi:10.7554/elife.58565), 2021-03-19
Supplement: supp [file elife-58565-supp-v1.zip › elife_poa_e58565_Figure_2_figure_supplement_1_source_data_2.xlsx]

## Sheet: RNA prep 16.11.2020
							#	Genotype	Treatment	#/Gender	Time on RU	OD 260 (1:100)	RNA concentration (µg/µl)	total RNA yield µg	Comment	5 µg = µl	µl buffer		Area SOL820	Area RpL32	Rel. area			Rel. area		wDahT	w1118; da-GS. (G4C2)36 EtOH	w1118; da-GS. (G4C2)36 RU	w1118; da-GS. (G4C2)36, UAS-InRactive	w1118; da-GS. (G4C2)36, UAS-InRDN
																							w1118; da-GS. (G4C2)36
																							w1118; da-GS. (G4C2)36
																							w1118; da-GS. (G4C2)36, UAS-InRactive
																							w1118; da-GS. (G4C2)36, UAS-InRDN
																							w1118; da-GS. (G4C2)36, UAS-InRDN
																							wDahT
																							w1118; da-GS. (G4C2)36
																							w1118; da-GS. (G4C2)36
																							w1118; da-GS. (G4C2)36, UAS-InRactive
																							w1118; da-GS. (G4C2)36, UAS-InRactive
																							w1118; da-GS. (G4C2)36, UAS-InRDN
																							wDahT
																							w1118; da-GS. (G4C2)36
																							w1118; da-GS. (G4C2)36
																							w1118; da-GS. (G4C2)36
																							w1118; da-GS. (G4C2)36, UAS-InRactive
																							w1118; da-GS. (G4C2)36, UAS-InRDN
																							wDahT
																							w1118; da-GS. (G4C2)36
																							w1118; da-GS. (G4C2)36
																							w1118; da-GS. (G4C2)36
																							w1118; da-GS. (G4C2)36, UAS-InRactive
																							w1118; da-GS. (G4C2)36, UAS-InRDN
21						SOL821	Yaa a	wDahT	-	25 Females	-	0.863	3.452	172.6	control with no hexanucleotide repeat, test for background due to possible gDNA contamination etc.)	1.44844	498.552		2267134	10321083	0.21966					0.21966	0.147861	1.19844	1.00448	0.942931
1							1	w1118; da-GS. (G4C2)36	EtOH	25 Females	-	1.055	4.22	211	uninduced control	1.18483	498.815		1671700	11305912	0.147861					0.0934287	0.0665306	1.11778	1.01166	1.05749
6	51	52	53	54	55		11	w1118; da-GS. (G4C2)36	RU	25 Females	5	0.774	3.096	154.8	experimental samples	1.61499	498.385		17169711	14326690	1.19844					0.113804	0.0664467	0.800745	1.00981	0.93007
11							31	w1118; da-GS. (G4C2)36, UAS-InRactive	RU	25 Females	5	0.705	2.82	141	experimental samples	1.77305	498.227		14674640	14609154	1.00448		w1118; da-GS. (G4C2)36, UAS-InRactive			0.0904506	0.0280122	1.00287	1.03945	0.912386
16	3	13	33	53		Yaa c	51	w1118; da-GS. (G4C2)36, UAS-InRDN	RU	25 Females	5	0.7	2.8	140	experimental samples	1.78571	498.214		13989912	14836619	0.942931		w1118; da-GS. (G4C2)36, UAS-InRDN				0.0918755	1.17351	0.920882	0.964122
17	4	14	34	54		Yaa d	52	w1118; da-GS. (G4C2)36, UAS-InRDN	RU	25 Females	5	0.682	2.728	136.4	experimental samples	1.83284	498.167		16045569	15173205	1.05749		w1118; da-GS. (G4C2)36, UAS-InRDN
22							Yaa b	wDahT	-	25 Females	-	0.708	2.832	141.6	control with no hexanucleotide repeat, test for background due to possible gDNA contamination etc.)	1.76554	498.234		1367234	14633983	0.0934287		wDahT
2							2	w1118; da-GS. (G4C2)36	EtOH	25 Females	-	0.689	2.756	137.8	uninduced control	1.81422	498.186		993113	14927154	0.0665306		w1118; da-GS. (G4C2)36
7							12	w1118; da-GS. (G4C2)36	RU	25 Females	5	0.759	3.036	151.8	experimental samples	1.6469	498.353		14586711	13049740	1.11778		w1118; da-GS. (G4C2)36
12							32	w1118; da-GS. (G4C2)36, UAS-InRactive	RU	25 Females	5	0.862	3.448	172.4	experimental samples	1.45012	498.55		13316397	13162912	1.01166		w1118; da-GS. (G4C2)36, UAS-InRactive
13							33	w1118; da-GS. (G4C2)36, UAS-InRactive	RU	25 Females	5	0.655	2.62	131	experimental samples	1.9084	498.092		16933276	16768740	1.00981		w1118; da-GS. (G4C2)36, UAS-InRactive
18	5	15	35	55			53	w1118; da-GS. (G4C2)36, UAS-InRDN	RU	25 Females	5	0.658	2.632	131.6	experimental samples	1.8997	498.1		13319397	14320861	0.93007		w1118; da-GS. (G4C2)36, UAS-InRDN
23							Yaa c	wDahT	-	25 Females	-	0.782	3.128	156.4	control with no hexanucleotide repeat, test for background due to possible gDNA contamination etc.)	1.59847	498.402		1414355	12428033	0.113804		wDahT
3	1	2	3	4	5		3	w1118; da-GS. (G4C2)36	EtOH	25 Females	-	0.732	2.928	146.4	uninduced control	1.70765	498.292		899062	13530569	0.0664467		w1118; da-GS. (G4C2)36
8	Yaa a	Yaa b	Yaa c	Yaa d			13	w1118; da-GS. (G4C2)36	RU	25 Females	5	0.685	2.74	137	experimental samples	1.82482	498.175		9843861	12293376	0.800745		w1118; da-GS. (G4C2)36
9							14	w1118; da-GS. (G4C2)36	RU	25 Females	5	0.678	2.712	135.6	experimental samples	1.84366	498.156		14272154	14231376	1.00287		w1118; da-GS. (G4C2)36
14	1	11	31	51		Yaa a	34	w1118; da-GS. (G4C2)36, UAS-InRactive	RU	25 Females	5	0.627	2.508	125.4	experimental samples	1.99362	498.006		17631468	16962225	1.03945		w1118; da-GS. (G4C2)36, UAS-InRactive
19							54	w1118; da-GS. (G4C2)36, UAS-InRDN	RU	25 Females	5	0.732	2.928	146.4	experimental samples	1.70765	498.292		13809104	15135154	0.912386		w1118; da-GS. (G4C2)36, UAS-InRDN
24							Yaa d	wDahT	-	25 Females	-	0.746	2.984	149.2	control with no hexanucleotide repeat, test forbackground due to possible gDNA contamination etc.)	1.6756	498.324		1195941	13222033	0.0904506		wDahT
4	11	12	13	14	15		4	w1118; da-GS. (G4C2)36	EtOH	25 Females	-	0.947	3.788	189.4	uninduced control	1.31996	498.68		351920	12563083	0.0280122		w1118; da-GS. (G4C2)36
5	31	32	33	34	35		5	w1118; da-GS. (G4C2)36	EtOH	25 Females	-	0.729	2.916	145.8	uninduced control	1.71468	498.285		1624548	17682054	0.0918755		w1118; da-GS. (G4C2)36
10						SOL821	15	w1118; da-GS. (G4C2)36	RU	25 Females	5	0.837	3.348	167.4	experimental samples	1.49343	498.507		19693246	16781468	1.17351		w1118; da-GS. (G4C2)36
15	2	12	32	52		Yaa b	35	w1118; da-GS. (G4C2)36, UAS-InRactive	RU	25 Females	5	0.706	2.824	141.2	experimental samples	1.77054	498.229		16435246	17847296	0.920882		w1118; da-GS. (G4C2)36, UAS-InRactive
20							55	w1118; da-GS. (G4C2)36, UAS-InRDN	RU	25 Females	5	0.609	2.436	121.8	experimental samples	2.05255	497.947		20642418	21410589	0.964122		w1118; da-GS. (G4C2)36, UAS-InRDN
							Loading											Genotype		Treatment	Average rel. area	Fold change	SD
																			w1118; da-GS. (G4C2)36 EtOH	EtOH	0.0931784	1	0.038369
																			w1118; da-GS. (G4C2)36 RU	RU	1.07262	11.5115	0.18436
																			w1118; da-GS. (G4C2)36, UAS-InR active RU	RU	0.984972	10.5708	0.0428979
																			w1118; da-GS. (G4C2)36, UAS-InR DN RU	RU	0.98908	10.6149	0.0436656
																				Statistical analysis
																		da-GS/UAS(G4C2)36 EtOH (not induced)	da-GS/UAS(G4C2)36 RU	da-GS/UAS(G4C2)36, UAS InR CA RU	da-GS/UAS(G4C2)36, UAS InR DN RU
																		0.147861	1.19844	1.00448	0.942931
																		0.0665306	1.11778	1.01166	1.05749
																		0.0664467	0.800745	1.00981	0.93007
																		0.0280122	1.00286	1.03946	0.912386
																		0.0918755	1.17351	0.920882	0.964122
																		One -way ANOVA summary
																		F	128.2
																		P value	< 0.0001
																		P value summary	****
																		Are differences among means statistically significant? (P < 0.05)	Yes
																		R square	0.9601
																		Number of comparisons per family	3
																		Alpha	0.05
																		Dunnett's multiple comparisons test	Mean Diff.	95% CI of diff.	Significant?	Summary	Adjusted P Value
																		da-GS/UAS36R RU vs. da-GS/UAS36R EtOH (not induced)	0.9785	0.8281 to 1.129	Yes	****	< 0.0001
																		da-GS/UAS36R RU vs. da-GS/UAS36R, UAS InR CA RU	0.06141	-0.08902 to 0.2118	No	ns	0.5961
																		da-GS/UAS36R RU vs. da-GS/UAS36R, UAS InR DN RU	0.09727	-0.05316 to 0.2477	No	ns	0.2569
																		Test details	Mean 1	Mean 2	Mean Diff.	SE of diff.	n1	n2	q	DF
																		da-GS/UAS36R RU vs. da-GS/UAS36R EtOH	1.059	0.08015	0.9785	0.05802	5	5	16.86	16
																		da-GS/UAS36R RU vs. da-GS/UAS36R, UAS InR CA RU	1.059	0.9973	0.06141	0.05802	5	5	1.058	16
																		da-GS/UAS36R RU vs. da-GS/UAS36R, UAS InR DN RU	1.059	0.9614	0.09727	0.05802	5	5	1.676	16
