# Supplementary material for: Enhanced insulin signalling ameliorates C9orf72 hexanucleotide repeat expansion toxicity in Drosophila
Source: eLife journal article supplement (doi:10.7554/elife.58565), 2021-03-19
Supplement: supp [file elife-58565-supp-v1.zip › elife_poa_e58565_Figure_2_figure_supplement_1_source_data_3.xlsx]

## Sheet: Sheet1
Figure 2 - Figure supplement 5 - source data 3 - related to panel C						Western blot
	Sample	Actin	GFP	GFP/Actin		(G4C2)36/+	(G4C2)36/InR active	(G4C2)36/InR DN
1	(G4C2)36/+	14101.5	18389.6	1.30408		1.3	1	1.37
2	(G4C2)36/InR active	13700.3	13096.9	0.955955		2.2	1.7	1.9
3	(G4C2)36/InR DN	12467.1	17133.5	1.3743		2.1	1.5	1.5
4	(G4C2)36/+	11913	27198.2	2.28307
5	(G4C2)36/nR active	15968	27088.4	1.69642
6	(G4C2)36/InR DN	17278	32620	1.88795		Statistica analysis	Data 1
7	(G4C2)36/+	16594.4	34719	2.09221
8	(G4C2)36/InR active	19248.8	28499.4	1.48058		ANOVA summary
9	(G4C2)36/InR DN	21156.5	32360.5	1.52958		F	1.102
						P value	0.3911
						P value summary	ns
						Are differences among means statistically significant? (P < 0.05)	No
						Tukey's multiple comparisons test	Mean Diff.	95% CI of diff.	Significant?	Summary	Adjusted P Value
						(G4C2)36/+ vs. (G4C2)36/InR active	0.4667	-0.5032 to 1.437	No	ns	0.3653
						(G4C2)36/+ vs. (G4C2)36/InR DN	0.2767	-0.6932 to 1.247	No	ns	0.674
						(G4C2)36/InR active vs. (G4C2)36/InR DN	-0.19	-1.160 to 0.7799	No	ns	0.8247
						Test details	Mean 1	Mean 2	Mean Diff.	SE of diff.	n1	n2	q	DF
						(G4C2)36/+ vs. (G4C2)36/InR active	1.867	1.4	0.4667	0.3161	3	3	2.088	6
						(G4C2)36/+ vs. (G4C2)36/InR DN	1.867	1.59	0.2767	0.3161	3	3	1.238	6
						(G4C2)36/InR active vs. (G4C2)36/InR DN	1.4	1.59	-0.19	0.3161	3	3	0.8501	6
