# Supplementary material for: Enhanced insulin signalling ameliorates C9orf72 hexanucleotide repeat expansion toxicity in Drosophila
Source: eLife journal article supplement (doi:10.7554/elife.58565), 2021-03-19
Supplement: supp [file elife-58565-supp-v1.zip › elife_poa_e58565_Figure_2_figure_supplement_1_source_data_4.xlsx]

## Sheet: Day sleep
Related to figure 2- Figure supplement 1 D						Table Analyzed	day sleep two annova
Day sleep
Drug	RU-	RU+	RU-	RU+		Two-way ANOVA	Ordinary
Genotype	(G4C2)36/+	(G4C2)36/+	(G4C2)36/InRActive	(G4C2)36/InRActive		Alpha	0.05
	299	583	77	179
	307	215	233	314		Source of Variation	% of total variation	P value	P value summary	Significant?
	284	609	236	413		Interaction	5.955	0.0035	**	Yes
	328	199	253	298		Compare cell means regardless of rows and columns
	40	498	447	144
	222	65	352	244		Number of families	1
	310	547	171	505		Number of comparisons per family	6
	210	439	261	179		Alpha	0.05
	254	454	179	239
	94	272	345	188		Sidak's multiple comparisons test	Mean Diff.	95% CI of diff.	Significant?	Summary	Adjusted P Value
	242	562	243	421
	153	199	27	321		Ru-:(G4C2)36 vs. Ru-:(G4C2)36/INRactive	-58.13	-137.8 to 21.55	No	ns	0.2801
	110	296	211	31		Ru-:(G4C2)36 vs. Ru+:(G4C2)36	-161.1	-241.4 to -80.77	Yes	****	< 0.0001
	94	471	163	253		Ru-:(G4C2)36 vs. Ru+:(G4C2)36/INRactive	-91.05	-173.5 to -8.576	Yes	*	0.0225
	198	368	313	449		Ru-:(G4C2)36/INRactive vs. Ru+:(G4C2)36	-103	-183.3 to -22.65	Yes	**	0.005
	272	623	432	273		Ru-:(G4C2)36/INRactive vs. Ru+:(G4C2)36/INRactive	-32.92	-115.4 to 49.55	No	ns	0.8693
	173	604	269	260		Ru+:(G4C2)36 vs. Ru+:(G4C2)36/INRactive	70.04	-13.05 to 153.1	No	ns	0.1459
	295	350	380	311
	226	234	410	351
	260	346	290	427		Test details	Mean 1	Mean 2	Mean Diff.	SE of diff.	N1	N2	t	DF
	287	526	73	336
	107	313	353	415		Ru-:(G4C2)36 vs. Ru-:(G4C2)36,UASINRactive	224.8	283	-58.13	29.78	32	32	1.952	119
	153	342	315	251		Ru-:(G4C2)36 vs. Ru+:(G4C2)36	224.8	385.9	-161.1	30.02	32	31	5.366	119
	190	579	360	395		Ru-:(G4C2)36 vs. Ru+:(G4C2)36,UASINRactive	224.8	315.9	-91.05	30.83	32	28	2.954	119
	523	139	354	363		Ru-:(G4C2)36,UASINRactive vs. Ru+:(G4C2)36	283	385.9	-103	30.02	32	31	3.43	119
	140	459	438	477		Ru-:(G4C2)36,UASINRactive vs. Ru+:(G4C2)36,UASINRactive	283	315.9	-32.92	30.83	32	28	1.068	119
	281	197	384	475		Ru+:(G4C2)36 vs. Ru+:(G4C2)36,UASINRactive	385.9	315.9	70.04	31.06	31	28	2.255	119
	200	351	433	333
	297	356	343
	224	325	249
	233	443	179
	189	443	282

## Sheet: Night sleep
Related to figure 2- Figure supplement 1 E
Night sleep
	Drug	RU-	RU+	RU-	RU+			Table Analyzed	Night sleep two-way annova
	Genotype	(G4C2)36/+	(G4C2)36/+	(G4C2)36/InRActive	(G4C2)36/InRActive
		599	710	556	689			Two-way ANOVA	Ordinary
		516	644	591	647			Alpha	0.05
		542	660	644	688
		441	504	693	655			Source of Variation	% of total variation	P value	P value summary	Significant?
		309	707	609	543			Interaction	4.169	0.0119	*	Yes
		480	504	612	598			Induction	5.357	0.0045	**	Yes
		444	631	442	555			genotype	11.14	< 0.0001	****	Yes
		477	720	401	662			Holm-Sidak's multiple comparisons test	Mean Diff.	Significant?	Summary	Adjusted P Value
		357	583	690	691			Ru-:(G4C2)36 vs. Ru-:(G4C2)36/ INRactive	-100.4	Yes	****	< 0.0001
		414	638	661	667			Ru-:(G4C2)36 vs. Ru+:(G4C2)36	-81.34	Yes	***	0.0007
		550	601	688	624			Ru-:(G4C2)36 vs. Ru+:(G4C2)36/ INRactive	-105.5	Yes	****	< 0.0001
		503	678	574	603			Ru-:(G4C2)36/ INRactive vs. Ru+:(G4C2)36	19.09	No	ns	0.6003
		687	540	623	474			Ru-:(G4C2)36, INRactive vs. Ru+:(G4C2)36/ INRactive	-5.094	No	ns	0.8098
		561	570	658	509			Ru+:(G4C2)36 vs. Ru+:(G4C2)36/ INRactive	-24.19	No	ns	0.5855
		627	701	688	694
		405	462	707	573
		397	705	624	644			Test details	Mean 1	Mean 2	Mean Diff.	SE of diff.	N1	N2	t	DF
		495	672	553	637
		611	584	645	432			Ru-:(G4C2)36 vs. Ru-:(G4C2)36, INRactive	520.8	621.3	-100.4	21.12	32	32	4.755	124
		348	627	581	470			Ru-:(G4C2)36 vs. Ru+:(G4C2)36	520.8	602.2	-81.34	21.12	32	32	3.851	124
		599	592	648	637			Ru-:(G4C2)36 vs. Ru+:(G4C2)36, INRactive	520.8	626.4	-105.5	21.12	32	32	4.996	124
		528	621	693	709			Ru-:(G4C2)36, INRactive vs. Ru+:(G4C2)36	621.3	602.2	19.09	21.12	32	32	0.904	124
		491	717	510	625			Ru-:(G4C2)36, INRactive vs. Ru+:(G4C2)36, INRactive	621.3	626.4	-5.094	21.12	32	32	0.2412	124
		604	545	659	677			Ru+:(G4C2)36 vs. Ru+:(G4C2)36, INRactive	602.2	626.4	-24.19	21.12	32	32	1.145	124
		679	658	580	680
		449	498	694	668
		576	410	572	698
		427	528	704	712
		713	572	698	627
		587	611	701	676
		609	494	548	650
		642	583	634	630
