# Supplementary material for: Enhanced insulin signalling ameliorates C9orf72 hexanucleotide repeat expansion toxicity in Drosophila
Source: eLife journal article supplement (doi:10.7554/elife.58565), 2021-03-19
Supplement: supp [file elife-58565-supp-v1.zip › elife_poa_e58565_Figure_2_source_data_1.xls]

## Sheet: summary
experiment	(G4C2)36 and InR signaling			start	2017-10-03
notes				day	date	day	date	day	date	day	date
				1	2017-10-04	26	2017-10-29	51	2017-11-23	76	2017-12-18
				2	2017-10-05	27	2017-10-30	52	2017-11-24	77	2017-12-19
				3	2017-10-06	28	2017-10-31	53	2017-11-25	78	2017-12-20
				4	2017-10-07	29	2017-11-01	54	2017-11-26	79	2017-12-21
				5	2017-10-08	30	2017-11-02	55	2017-11-27	80	2017-12-22
				6	2017-10-09	31	2017-11-03	56	2017-11-28	81	2017-12-23
				7	2017-10-10	32	2017-11-04	57	2017-11-29	82	2017-12-24
				8	2017-10-11	33	2017-11-05	58	2017-11-30	83	2017-12-25
				9	2017-10-12	34	2017-11-06	59	2017-12-01	84	2017-12-26
				10	2017-10-13	35	2017-11-07	60	2017-12-02	85	2017-12-27
				11	2017-10-14	36	2017-11-08	61	2017-12-03	86	2017-12-28
				12	2017-10-15	37	2017-11-09	62	2017-12-04	87	2017-12-29
				13	2017-10-16	38	2017-11-10	63	2017-12-05	88	2017-12-30
				14	2017-10-17	39	2017-11-11	64	2017-12-06	89	2017-12-31
				15	2017-10-18	40	2017-11-12	65	2017-12-07	90	2018-01-01
				16	2017-10-19	41	2017-11-13	66	2017-12-08	91	2018-01-02
				17	2017-10-20	42	2017-11-14	67	2017-12-09	92	2018-01-03
				18	2017-10-21	43	2017-11-15	68	2017-12-10	93	2018-01-04
				19	2017-10-22	44	2017-11-16	69	2017-12-11	94	2018-01-05
				20	2017-10-23	45	2017-11-17	70	2017-12-12	95	2018-01-06
				21	2017-10-24	46	2017-11-18	71	2017-12-13	96	2018-01-07
				22	2017-10-25	47	2017-11-19	72	2017-12-14	97	2018-01-08
				23	2017-10-26	48	2017-11-20	73	2017-12-15	98	2018-01-09
				24	2017-10-27	49	2017-11-21	74	2017-12-16	99	2018-01-10
				25	2017-10-28	50	2017-11-22	75	2017-12-17	100	2018-01-11
	1	2	3	4	5	6	7	8	9	10
condition	UAS-InR RU +	UAS-InR RU -	W1118 RU +	W1118 RU -	UAS-InR DN BL RU +	UAS-InR DN BL RU -	UAS-InR DN RU +	UAS-InR DN RU -	UAS-InR active RU +	UAS-InR active RU -
container	vials	vials	vials	vials	vials	vials	vials	vials	vials	vials
flies per container	15	15	15	15	15	15	15	15	15	15
# containers	10	10	8	8	10	10	10	10	10	10
calculated start #	150	150	120	120	150	150	150	150	150	150
total deaths	141	140	116	126	152	144	150	136	137	143
total censors	13	13	8	2	7	10	2	14	14	9
actual start #	154	153	124	128	159	154	152	150	151	152
condition	UAS-InR RU +	UAS-InR RU -	W1118 RU +	W1118 RU -	UAS-InR DN BL RU +	UAS-InR DN BL RU -	UAS-InR DN RU +	UAS-InR DN RU -	UAS-InR active RU +	UAS-InR active RU -	condition
gender	female	female	female	female	female	female	female	female	female	female	gender
mating status	mated 48h	mated 48h	mated 48h	mated 48h	mated 48h	mated 48h	mated 48h	mated 48h	mated 48h	mated 48h	mating status
Wolbachia infected	Yes	Yes	Yes	Yes	Yes	Yes	Yes	Yes	Yes	Yes	Wolbachia infected
temperature	25 C	25 C	25 C	25 C	25 C	25 C	25 C	25 C	25 C	25 C	temperature
base food	1 SY	1 SY	1 SY	1 SY	1 SY	1 SY	1 SY	1 SY	1 SY	1 SY	base food
yeast batch											yeast batch
food addition											food addition
other envir. descriptor 1											other envir. descriptor 1
other envir. descriptor 2											other envir. descriptor 2
other envir. descriptor 3											other envir. descriptor 3
background / strain	Dahomey	Dahomey	Dahomey	Dahomey	Dahomey	Dahomey	Dahomey	Dahomey	Dahomey	Dahomey	background / strain
genetic alteration 1											genetic alteration 1
genetic alteration 2											genetic alteration 2
genetic alteration 3											genetic alteration 3

## Sheet: stats
(G4C2)36 and InR signaling				note: values will only be accurate at the end of the experiment
chi-squared values
		UAS-InR RU +	UAS-InR RU -	W1118 RU +	W1118 RU -	UAS-InR DN BL RU +	UAS-InR DN BL RU -	UAS-InR DN RU +	UAS-InR DN RU -	UAS-InR active RU +	UAS-InR active RU -
	UAS-InR RU +		115.649	42.0061	86.1152	20.7066	96.8148	64.7706	110.702	0.446091	121.618
	UAS-InR RU -			286.632	3.04688	271.226	5.96091	313.774	0.0162478	249.205	0.420845
	W1118 RU +				248.6	5.00129	297.315	4.83243	293.724	89.6506	304.116
	W1118 RU -					217.263	0.0616117	262.836	2.47364	187.118	5.54266
	UAS-InR DN BL RU +						264.853	15.6946	271.363	34.1538	290.396
	UAS-InR DN BL RU -							308.494	4.73172	226.154	8.0975
	UAS-InR DN RU +								316.836	89.9282	336.426
	UAS-InR DN RU -									238.222	0.267107
	UAS-InR active RU +										262.017
	UAS-InR active RU -
chi-squared p-value for log-rank test on survivorship data
		UAS-InR RU +	UAS-InR RU -	W1118 RU +	W1118 RU -	UAS-InR DN BL RU +	UAS-InR DN BL RU -	UAS-InR DN RU +	UAS-InR DN RU -	UAS-InR active RU +	UAS-InR active RU -
	median (d)	23	67.5	16	67.5	16	67.5	9.5	72	25.5	72
	mean (d)	29.6232	70.7343	18.2223	66.8628	21.194	68.4383	16.4877	70.7914	30.4019	72.1768
	maximum (d)	81	81	32.5	82	44	81	28	81	53.5	81
	UAS-InR RU +		5.67268e-27	9.09875e-11	1.69753e-20	5.35308e-06	7.61263e-23	8.41437e-16	6.87607e-26	0.504197	2.79822e-28
	UAS-InR RU -			2.69361e-64	0.0808924	6.13355e-61	0.0146265	3.2892e-70	0.898571	3.87048e-56	0.516516
	W1118 RU +				5.24387e-56	0.0253284	1.26714e-66	0.0279293	7.67498e-66	2.8416e-21	4.17833e-68
	W1118 RU -					3.57605e-49	0.803967	4.1343e-59	0.115769	1.35371e-42	0.0185583
	UAS-InR DN BL RU +						1.50214e-59	7.44364e-05	5.72656e-61	5.09224e-09	4.07604e-65
	UAS-InR DN BL RU -							4.64756e-69	0.0296112	4.1136e-51	0.00443264
	UAS-InR DN RU +								7.08221e-71	2.46964e-21	3.83017e-75
	UAS-InR DN RU -									9.60216e-54	0.605279
	UAS-InR active RU +										6.23436e-59
	UAS-InR active RU -

## Sheet: cumulative dths per bottle
			deaths
				bottle number
	date	time	day	1	2	3	4	5	6	7	8	9	10	11	12	13	14	15	16	17	18	19	20	21	22	23	24	25	26	27	28	29	30	31	32	33	34	35	36	37	38	39	40	41	42	43	44	45	46
	2017-10-03	1899-12-31 12:00:00		16	15	14	15	14	15	16	17	16	16	0	0	0	0	0	0	0	0	0	0	15	14	17	16	15	15	15	16	14	16	0	0	0	0	0	0	0	0	0	0	15	15	17	15	13	18
1	2017-10-04	1899-12-31 12:00:00	1	0	0	0	0	0	0	0	0	0	0	0	0	0	0	0	0	0	0	0	0	0	0	0	0	0	0	0	0	0	0	0	0	0	0	0	0	0	0	0	0	0	0	0	0	0	0
2	2017-10-06	1899-12-31 12:00:00	3	0	0	0	1	0	0	0	0	0	0	0	0	0	0	0	0	0	0	0	0	1	0	1	0	0	0	0	0	0	0	0	0	0	0	0	0	0	0	0	0	0	0	0	0	0	0
3	2017-10-09	1899-12-31 12:00:00	6	0	1	0	1	0	0	0	1	0	0	0	0	0	0	0	0	0	0	0	0	0	0	0	0	0	0	0	0	0	0	0	0	0	0	0	0	0	0	0	0	0	0	0	0	0	0
4	2017-10-11	1899-12-31 12:00:00	8	0	0	0	0	0	0	0	0	0	0	0	0	0	0	0	0	0	0	0	0	0	0	0	0	0	0	0	0	0	0	0	0	0	0	0	0	0	0	0	0	0	0	0	0	1	0
5	2017-10-14	1899-12-31 12:00:00	11	2	1	1	1	2	2	0	1	2	2	0	0	0	0	0	0	0	0	0	0	0	0	0	0	0	0	0	0	0	0	0	0	0	0	0	0	0	0	0	0	5	3	4	3	4	2
6	2017-10-16	1899-12-31 12:00:00	13	2	1	1	1	0	1	3	1	2	1	0	0	0	0	0	0	0	0	0	0	0	0	0	0	0	0	0	0	0	0	0	0	0	0	0	0	0	0	0	0	1	1	2	0	1	1
7	2017-10-18	1899-12-31 12:00:00	15	1	0	0	1	0	0	0	1	0	1	0	0	0	0	0	0	0	0	0	0	0	0	0	0	0	1	0	0	0	0	0	0	0	0	0	0	0	0	0	0	1	1	1	1	0	2
8	2017-10-20	1899-12-31 12:00:00	17	2	0	3	0	1	0	0	1	0	0	0	0	0	0	0	0	0	0	0	0	0	0	0	0	0	0	0	0	0	0	0	0	0	0	0	0	0	0	0	0	2	0	0	2	1	6
9	2017-10-23	1899-12-31 12:00:00	20	0	3	4	4	1	4	2	4	3	0	0	0	0	0	0	0	0	0	0	0	0	1	0	0	0	0	0	0	0	0	0	0	0	0	0	0	0	0	0	0	1	6	8	3	3	3
10	2017-10-25	1899-12-31 12:00:00	22	0	0	0	0	1	0	1	0	0	1	0	0	0	0	0	0	0	0	0	0	0	0	0	0	0	0	0	0	0	0	0	0	0	0	0	0	0	0	0	0	0	1	1	3	2	0
11	2017-10-27	1899-12-31 12:00:00	24	0	1	1	1	1	2	2	1	1	1	0	0	0	0	0	0	0	0	0	0	0	0	0	0	0	0	0	0	0	0	0	0	0	0	0	0	0	0	0	0	1	2	0	1	0	0
12	2017-10-30	1899-12-31 12:00:00	27	4	3	2	1	3	1	4	1	3	3	0	0	0	0	0	0	0	0	0	0	0	0	0	0	0	0	0	0	0	0	0	0	0	0	0	0	0	0	0	0	1	0	0	1	1	0
13	2017-11-01	1899-12-31 12:00:00	29	0	1	0	0	0	0	0	2	1	1	0	0	0	0	0	0	0	0	0	0	0	0	0	0	0	0	0	0	0	0	0	0	0	0	0	0	0	0	0	0	0	0	0	0	0	0
14	2017-11-03	1899-12-31 12:00:00	31	1	0	0	0	0	0	0	0	0	0	0	0	0	0	0	0	0	0	0	0	0	0	0	0	0	0	0	0	0	0	0	0	0	0	0	0	0	0	0	0	0	0	0	0	0	0
15	2017-11-06	1899-12-31 12:00:00	34	0	1	0	0	1	0	0	0	0	1	0	0	0	0	0	0	0	0	0	0	0	0	0	0	0	0	0	0	0	0	0	0	0	0	0	0	0	0	0	0	2	0	0	0	0	0
16	2017-11-08	1899-12-31 12:00:00	36	0	0	0	0	0	0	0	0	0	1	0	0	0	0	0	0	0	0	0	0	0	0	0	0	0	0	0	0	0	0	0	0	0	0	0	0	0	0	0	0	0	0	0	0	0	0
17	2017-11-10	1899-12-31 12:00:00	38	0	0	0	0	0	0	0	0	0	0	0	0	0	0	0	0	0	0	0	0	0	0	0	0	0	0	0	0	0	0	0	0	0	0	0	0	0	0	0	0	0	0	1	0	0	0
18	2017-11-13	1899-12-31 12:00:00	41	0	0	0	0	1	0	0	1	0	0	0	0	0	0	0	0	0	0	0	0	0	0	0	0	0	0	0	0	0	0	0	0	0	0	0	0	0	0	0	0	0	0	0	0	0	0
19	2017-11-15	1899-12-31 12:00:00	43	0	0	0	0	0	0	0	0	0	0	0	0	0	0	0	0	0	0	0	0	0	0	0	0	0	0	0	0	0	0	0	0	0	0	0	0	0	0	0	0	0	0	0	0	0	0
20	2017-11-17	1899-12-31 12:00:00	45	0	0	0	0	1	0	0	0	0	0	0	0	0	0	0	0	0	0	0	0	0	0	0	0	0	0	0	0	0	0	0	0	0	0	0	0	0	0	0	0	1	0	0	0	0	0
21	2017-11-20	1899-12-31 12:00:00	48	0	1	0	2	0	0	0	0	0	1	0	0	0	0	0	0	0	0	0	0	0	0	0	0	0	0	0	0	0	0	0	0	0	0	0	0	0	0	0	0	0	0	0	0	0	0
22	2017-11-22	1899-12-31 12:00:00	50	1	0	0	0	0	0	0	0	0	0	0	0	0	0	0	0	0	0	0	0	0	0	0	0	0	0	0	0	0	0	0	0	0	0	0	0	0	0	0	0	0	0	0	0	0	0
23	2017-11-24	1899-12-31 12:00:00	52	0	0	0	0	0	0	0	0	0	0	0	0	0	0	0	0	0	0	0	0	0	0	0	0	0	0	0	0	0	0	0	0	0	0	0	0	0	0	0	0	0	0	0	0	0	0
24	2017-11-27	1899-12-31 12:00:00	55	0	0	0	0	0	0	0	0	0	0	0	0	0	0	0	0	0	0	0	0	0	1	0	1	0	0	1	0	0	0	0	0	0	0	0	0	0	0	0	0	0	0	0	0	0	0
25	2017-11-29	1899-12-31 12:00:00	57	0	0	0	0	0	0	0	0	0	0	0	0	0	0	0	0	0	0	0	0	0	0	0	0	0	0	0	0	0	0	0	0	0	0	0	0	0	0	0	0	0	0	0	0	0	0
26	2017-12-01	1899-12-31 12:00:00	59	0	0	0	0	0	0	0	0	0	0	0	0	0	0	0	0	0	0	0	0	0	0	0	0	0	2	0	0	0	0	0	0	0	0	0	0	0	0	0	0	0	0	0	0	0	0
27	2017-12-04	1899-12-31 12:00:00	62	0	0	0	0	0	0	0	0	0	0	0	0	0	0	0	0	0	0	0	0	0	0	1	0	0	0	0	3	1	0	0	0	0	0	0	0	0	0	0	0	0	0	0	0	0	0
28	2017-12-06	1899-12-31 12:00:00	64	0	0	0	0	0	0	0	0	0	0	0	0	0	0	0	0	0	0	0	0	1	0	0	0	0	0	1	1	0	2	0	0	0	0	0	0	0	0	0	0	0	0	0	0	0	0
29	2017-12-08	1899-12-31 12:00:00	66	0	0	0	0	0	0	0	0	0	0	0	0	0	0	0	0	0	0	0	0	2	0	0	0	1	0	0	0	0	0	0	0	0	0	0	0	0	0	0	0	0	0	0	0	0	0
30	2017-12-11	1899-12-31 12:00:00	69	0	1	0	0	0	0	1	1	0	0	0	0	0	0	0	0	0	0	0	0	2	1	3	9	6	5	9	9	3	5	0	0	0	0	0	0	0	0	0	0	0	0	0	0	0	0
31	2017-12-13	1899-12-31 12:00:00	71	0	0	0	0	0	0	0	0	0	0	0	0	0	0	0	0	0	0	0	0	0	0	2	0	1	0	0	0	0	0	0	0	0	0	0	0	0	0	0	0	0	0	0	0	0	0
32	2017-12-15	1899-12-31 12:00:00	73	0	0	0	0	0	0	0	0	0	1	0	0	0	0	0	0	0	0	0	0	1	0	1	0	0	2	0	0	0	2	0	0	0	0	0	0	0	0	0	0	0	0	0	0	0	0
33	2017-12-18	1899-12-31 12:00:00	76	0	1	0	1	0	0	1	0	0	1	0	0	0	0	0	0	0	0	0	0	3	3	2	3	3	2	2	0	3	3	0	0	0	0	0	0	0	0	0	0	0	0	0	0	0	0
34	2017-12-20	1899-12-31 12:00:00	78	0	0	0	0	0	0	0	0	0	0	0	0	0	0	0	0	0	0	0	0	0	0	0	0	0	0	0	0	1	0	0	0	0	0	0	0	0	0	0	0	0	0	0	0	0	0
35	2017-12-22	1899-12-31 12:00:00	80	0	0	0	0	0	0	0	0	0	0	0	0	0	0	0	0	0	0	0	0	0	0	0	0	0	0	0	2	0	1	0	0	0	0	0	0	0	0	0	0	0	0	0	0	0	0
36	2017-12-24	1899-12-31 12:00:00	82	0	0	0	0	1	3	2	0	0	0	0	0	0	0	0	0	0	0	0	0	3	0	5	2	1	1	1	1	3	2	0	0	0	0	0	0	0	0	0	0	0	0	0	0	0	0
37	2017-12-27	1899-12-31 12:00:00	85	0	0	0	0	0	0	0	0	0	0	0	0	0	0	0	0	0	0	0	0	1	0	0	1	2	1	1	0	1	1	0	0	0	0	0	0	0	0	0	0	0	0	0	0	0	0
38	2017-12-30	1899-12-31 12:00:00	88	0	0	0	0	1	1	0	0	1	0	0	0	0	0	0	0	0	0	0	0	0	0	0	0	0	0	0	0	1	0	0	0	0	0	0	0	0	0	0	0	0	0	0	0	0	0
39	2018-01-02	1899-12-31 12:00:00	91	0	0	0	0	0	0	0	0	0	0	0	0	0	0	0	0	0	0	0	0	0	1	0	0	0	0	0	0	0	0	0	0	0	0	0	0	0	0	0	0	0	0	0	0	0	0
40	2018-01-04	1899-12-31 12:00:00	93	0	0	0	0	0	0	0	0	0	0	0	0	0	0	0	0	0	0	0	0	0	0	0	0	0	0	0	0	0	0	0	0	0	0	0	0	0	0	0	0	0	0	0	0	0	0
41	2000-01-01	1899-12-31 12:00:00	93	0	0	0	0	0	0	0	0	0	0	0	0	0	0	0	0	0	0	0	0	0	0	0	0	0	0	0	0	0	0	0	0	0	0	0	0	0	0	0	0	0	0	0	0	0	0
42	2000-01-01	1899-12-31 12:00:00	93	0	0	0	0	0	0	0	0	0	0	0	0	0	0	0	0	0	0	0	0	0	0	0	0	0	0	0	0	0	0	0	0	0	0	0	0	0	0	0	0	0	0	0	0	0	0
43	2000-01-01	1899-12-31 12:00:00	93	0	0	0	0	0	0	0	0	0	0	0	0	0	0	0	0	0	0	0	0	0	0	0	0	0	0	0	0	0	0	0	0	0	0	0	0	0	0	0	0	0	0	0	0	0	0
44	2000-01-01	1899-12-31 12:00:00	93	0	0	0	0	0	0	0	0	0	0	0	0	0	0	0	0	0	0	0	0	0	0	0	0	0	0	0	0	0	0	0	0	0	0	0	0	0	0	0	0	0	0	0	0	0	0
45	2000-01-01	1899-12-31 12:00:00	93	0	0	0	0	0	0	0	0	0	0	0	0	0	0	0	0	0	0	0	0	0	0	0	0	0	0	0	0	0	0	0	0	0	0	0	0	0	0	0	0	0	0	0	0	0	0
46	2000-01-01	1899-12-31 12:00:00	93	0	0	0	0	0	0	0	0	0	0	0	0	0	0	0	0	0	0	0	0	0	0	0	0	0	0	0	0	0	0	0	0	0	0	0	0	0	0	0	0	0	0	0	0	0	0
47	2000-01-01	1899-12-31 12:00:00	93	0	0	0	0	0	0	0	0	0	0	0	0	0	0	0	0	0	0	0	0	0	0	0	0	0	0	0	0	0	0	0	0	0	0	0	0	0	0	0	0	0	0	0	0	0	0
48	2000-01-01	1899-12-31 12:00:00	93	0	0	0	0	0	0	0	0	0	0	0	0	0	0	0	0	0	0	0	0	0	0	0	0	0	0	0	0	0	0	0	0	0	0	0	0	0	0	0	0	0	0	0	0	0	0
49	2000-01-01	1899-12-31 12:00:00	93	0	0	0	0	0	0	0	0	0	0	0	0	0	0	0	0	0	0	0	0	0	0	0	0	0	0	0	0	0	0	0	0	0	0	0	0	0	0	0	0	0	0	0	0	0	0
50	2000-01-01	1899-12-31 12:00:00	93	0	0	0	0	0	0	0	0	0	0	0	0	0	0	0	0	0	0	0	0	0	0	0	0	0	0	0	0	0	0	0	0	0	0	0	0	0	0	0	0	0	0	0	0	0	0
51	2000-01-01	1899-12-31 12:00:00	93	0	0	0	0	0	0	0	0	0	0	0	0	0	0	0	0	0	0	0	0	0	0	0	0	0	0	0	0	0	0	0	0	0	0	0	0	0	0	0	0	0	0	0	0	0	0
52	2000-01-01	1899-12-31 12:00:00	93	0	0	0	0	0	0	0	0	0	0	0	0	0	0	0	0	0	0	0	0	0	0	0	0	0	0	0	0	0	0	0	0	0	0	0	0	0	0	0	0	0	0	0	0	0	0
53	2000-01-01	1899-12-31 12:00:00	93	0	0	0	0	0	0	0	0	0	0	0	0	0	0	0	0	0	0	0	0	0	0	0	0	0	0	0	0	0	0	0	0	0	0	0	0	0	0	0	0	0	0	0	0	0	0
54	2000-01-01	1899-12-31 12:00:00	93	0	0	0	0	0	0	0	0	0	0	0	0	0	0	0	0	0	0	0	0	0	0	0	0	0	0	0	0	0	0	0	0	0	0	0	0	0	0	0	0	0	0	0	0	0	0
55	2000-01-01	1899-12-31 12:00:00	93	0	0	0	0	0	0	0	0	0	0	0	0	0	0	0	0	0	0	0	0	0	0	0	0	0	0	0	0	0	0	0	0	0	0	0	0	0	0	0	0	0	0	0	0	0	0
56	2000-01-01	1899-12-31 12:00:00	93	0	0	0	0	0	0	0	0	0	0	0	0	0	0	0	0	0	0	0	0	0	0	0	0	0	0	0	0	0	0	0	0	0	0	0	0	0	0	0	0	0	0	0	0	0	0
57	2000-01-01	1899-12-31 12:00:00	93	0	0	0	0	0	0	0	0	0	0	0	0	0	0	0	0	0	0	0	0	0	0	0	0	0	0	0	0	0	0	0	0	0	0	0	0	0	0	0	0	0	0	0	0	0	0
58	2000-01-01	1899-12-31 12:00:00	93	0	0	0	0	0	0	0	0	0	0	0	0	0	0	0	0	0	0	0	0	0	0	0	0	0	0	0	0	0	0	0	0	0	0	0	0	0	0	0	0	0	0	0	0	0	0
59	2000-01-01	1899-12-31 12:00:00	93	0	0	0	0	0	0	0	0	0	0	0	0	0	0	0	0	0	0	0	0	0	0	0	0	0	0	0	0	0	0	0	0	0	0	0	0	0	0	0	0	0	0	0	0	0	0
60	2000-01-01	1899-12-31 12:00:00	93	0	0	0	0	0	0	0	0	0	0	0	0	0	0	0	0	0	0	0	0	0	0	0	0	0	0	0	0	0	0	0	0	0	0	0	0	0	0	0	0	0	0	0	0	0	0
61	2000-01-01	1899-12-31 12:00:00	93	0	0	0	0	0	0	0	0	0	0	0	0	0	0	0	0	0	0	0	0	0	0	0	0	0	0	0	0	0	0	0	0	0	0	0	0	0	0	0	0	0	0	0	0	0	0
62	2000-01-01	1899-12-31 12:00:00	93	0	0	0	0	0	0	0	0	0	0	0	0	0	0	0	0	0	0	0	0	0	0	0	0	0	0	0	0	0	0	0	0	0	0	0	0	0	0	0	0	0	0	0	0	0	0
63	2000-01-01	1899-12-31 12:00:00	93	0	0	0	0	0	0	0	0	0	0	0	0	0	0	0	0	0	0	0	0	0	0	0	0	0	0	0	0	0	0	0	0	0	0	0	0	0	0	0	0	0	0	0	0	0	0
64	2000-01-01	1899-12-31 12:00:00	93	0	0	0	0	0	0	0	0	0	0	0	0	0	0	0	0	0	0	0	0	0	0	0	0	0	0	0	0	0	0	0	0	0	0	0	0	0	0	0	0	0	0	0	0	0	0
65	2000-01-01	1899-12-31 12:00:00	93	0	0	0	0	0	0	0	0	0	0	0	0	0	0	0	0	0	0	0	0	0	0	0	0	0	0	0	0	0	0	0	0	0	0	0	0	0	0	0	0	0	0	0	0	0	0
66	2000-01-01	1899-12-31 12:00:00	93	0	0	0	0	0	0	0	0	0	0	0	0	0	0	0	0	0	0	0	0	0	0	0	0	0	0	0	0	0	0	0	0	0	0	0	0	0	0	0	0	0	0	0	0	0	0
67	2000-01-01	1899-12-31 12:00:00	93	0	0	0	0	0	0	0	0	0	0	0	0	0	0	0	0	0	0	0	0	0	0	0	0	0	0	0	0	0	0	0	0	0	0	0	0	0	0	0	0	0	0	0	0	0	0
68	2000-01-01	1899-12-31 12:00:00	93	0	0	0	0	0	0	0	0	0	0	0	0	0	0	0	0	0	0	0	0	0	0	0	0	0	0	0	0	0	0	0	0	0	0	0	0	0	0	0	0	0	0	0	0	0	0
69	2000-01-01	1899-12-31 12:00:00	93	0	0	0	0	0	0	0	0	0	0	0	0	0	0	0	0	0	0	0	0	0	0	0	0	0	0	0	0	0	0	0	0	0	0	0	0	0	0	0	0	0	0	0	0	0	0
70	2000-01-01	1899-12-31 12:00:00	93	0	0	0	0	0	0	0	0	0	0	0	0	0	0	0	0	0	0	0	0	0	0	0	0	0	0	0	0	0	0	0	0	0	0	0	0	0	0	0	0	0	0	0	0	0	0
71	2000-01-01	1899-12-31 12:00:00	93	0	0	0	0	0	0	0	0	0	0	0	0	0	0	0	0	0	0	0	0	0	0	0	0	0	0	0	0	0	0	0	0	0	0	0	0	0	0	0	0	0	0	0	0	0	0
72	2000-01-01	1899-12-31 12:00:00	93	0	0	0	0	0	0	0	0	0	0	0	0	0	0	0	0	0	0	0	0	0	0	0	0	0	0	0	0	0	0	0	0	0	0	0	0	0	0	0	0	0	0	0	0	0	0
73	2000-01-01	1899-12-31 12:00:00	93	0	0	0	0	0	0	0	0	0	0	0	0	0	0	0	0	0	0	0	0	0	0	0	0	0	0	0	0	0	0	0	0	0	0	0	0	0	0	0	0	0	0	0	0	0	0
74	2000-01-01	1899-12-31 12:00:00	93	0	0	0	0	0	0	0	0	0	0	0	0	0	0	0	0	0	0	0	0	0	0	0	0	0	0	0	0	0	0	0	0	0	0	0	0	0	0	0	0	0	0	0	0	0	0
75	2000-01-01	1899-12-31 12:00:00	93	0	0	0	0	0	0	0	0	0	0	0	0	0	0	0	0	0	0	0	0	0	0	0	0	0	0	0	0	0	0	0	0	0	0	0	0	0	0	0	0	0	0	0	0	0	0
				13	15	12	14	14	14	16	15	13	15	0	0	0	0	0	0	0	0	0	0	14	7	15	16	14	14	15	16	13	16	0	0	0	0	0	0	0	0	0	0	15	14	17	14	13	14
		censors
				1	2	3	4	5	6	7	8	9	10	11	12	13	14	15	16	17	18	19	20	21	22	23	24	25	26	27	28	29	30	31	32	33	34	35	36	37	38	39	40	41	42	43	44	45	46
1	2017-10-04	1899-12-31 12:00:00	1	0	0	0	0	0	0	0	1	0	0	0	0	0	0	0	0	0	0	0	0	0	0	1	0	0	0	0	0	0	0	0	0	0	0	0	0	0	0	0	0	0	0	0	1	0	0
2	2017-10-06	1899-12-31 12:00:00	3	0	0	0	0	0	0	0	0	0	0	0	0	0	0	0	0	0	0	0	0	0	0	0	0	0	0	0	0	0	0	0	0	0	0	0	0	0	0	0	0	0	0	0	0	0	0
3	2017-10-09	1899-12-31 12:00:00	6	0	0	0	0	0	0	0	0	0	0	0	0	0	0	0	0	0	0	0	0	0	0	0	0	0	0	0	0	0	0	0	0	0	0	0	0	0	0	0	0	0	0	0	0	0	0
4	2017-10-11	1899-12-31 12:00:00	8	0	0	0	0	0	0	0	0	0	0	0	0	0	0	0	0	0	0	0	0	1	0	0	0	0	0	0	0	0	0	0	0	0	0	0	0	0	0	0	0	0	0	0	0	0	0
5	2017-10-14	1899-12-31 12:00:00	11	0	0	0	1	0	1	0	0	0	0	0	0	0	0	0	0	0	0	0	0	0	0	0	0	0	0	0	0	0	0	0	0	0	0	0	0	0	0	0	0	0	0	0	0	0	0
6	2017-10-16	1899-12-31 12:00:00	13	0	0	0	0	0	0	0	0	0	0	0	0	0	0	0	0	0	0	0	0	0	0	0	0	0	0	0	0	0	0	0	0	0	0	0	0	0	0	0	0	0	0	0	0	0	0
7	2017-10-18	1899-12-31 12:00:00	15	1	0	1	0	0	0	0	0	0	0	0	0	0	0	0	0	0	0	0	0	0	0	0	0	0	0	0	0	0	0	0	0	0	0	0	0	0	0	0	0	0	0	0	0	0	0
8	2017-10-20	1899-12-31 12:00:00	17	1	0	1	0	0	0	0	0	0	0	0	0	0	0	0	0	0	0	0	0	0	0	0	0	0	0	0	0	0	0	0	0	0	0	0	0	0	0	0	0	0	1	0	0	0	0
9	2017-10-23	1899-12-31 12:00:00	20	1	0	0	0	0	0	0	1	2	0	0	0	0	0	0	0	0	0	0	0	0	6	0	0	0	0	0	0	0	0	0	0	0	0	0	0	0	0	0	0	0	0	0	0	0	4
10	2017-10-25	1899-12-31 12:00:00	22	0	0	0	0	0	0	0	0	1	0	0	0	0	0	0	0	0	0	0	0	0	0	0	0	0	0	0	0	0	0	0	0	0	0	0	0	0	0	0	0	0	0	0	0	0	0
11	2017-10-27	1899-12-31 12:00:00	24	0	0	0	0	0	0	0	0	0	0	0	0	0	0	0	0	0	0	0	0	0	0	0	0	0	0	0	0	0	0	0	0	0	0	0	0	0	0	0	0	0	0	0	0	0	0
12	2017-10-30	1899-12-31 12:00:00	27	0	0	0	0	0	0	0	0	0	0	0	0	0	0	0	0	0	0	0	0	0	0	0	0	0	0	0	0	0	0	0	0	0	0	0	0	0	0	0	0	0	0	0	0	0	0
13	2017-11-01	1899-12-31 12:00:00	29	0	0	0	0	0	0	0	0	0	0	0	0	0	0	0	0	0	0	0	0	0	0	0	0	0	0	0	0	0	0	0	0	0	0	0	0	0	0	0	0	0	0	0	0	0	0
14	2017-11-03	1899-12-31 12:00:00	31	0	0	0	0	0	0	0	0	0	0	0	0	0	0	0	0	0	0	0	0	0	0	0	0	0	0	0	0	0	0	0	0	0	0	0	0	0	0	0	0	0	0	0	0	0	0
15	2017-11-06	1899-12-31 12:00:00	34	0	0	0	0	0	0	0	0	0	1	0	0	0	0	0	0	0	0	0	0	0	0	0	0	0	0	0	0	0	0	0	0	0	0	0	0	0	0	0	0	0	0	0	0	0	0
16	2017-11-08	1899-12-31 12:00:00	36	0	0	0	0	0	0	0	0	0	0	0	0	0	0	0	0	0	0	0	0	0	0	0	0	0	0	0	0	0	0	0	0	0	0	0	0	0	0	0	0	0	0	0	0	0	0
17	2017-11-10	1899-12-31 12:00:00	38	0	0	0	0	0	0	0	0	0	0	0	0	0	0	0	0	0	0	0	0	0	0	1	0	0	0	0	0	0	0	0	0	0	0	0	0	0	0	0	0	0	0	0	0	0	0
18	2017-11-13	1899-12-31 12:00:00	41	0	0	0	0	0	0	0	0	0	0	0	0	0	0	0	0	0	0	0	0	0	0	0	0	0	0	0	0	0	0	0	0	0	0	0	0	0	0	0	0	0	0	0	0	0	0
19	2017-11-15	1899-12-31 12:00:00	43	0	0	0	0	0	0	0	0	0	0	0	0	0	0	0	0	0	0	0	0	0	0	0	0	0	0	0	0	0	0	0	0	0	0	0	0	0	0	0	0	0	0	0	0	0	0
20	2017-11-17	1899-12-31 12:00:00	45	0	0	0	0	0	0	0	0	0	0	0	0	0	0	0	0	0	0	0	0	0	0	0	0	0	0	0	0	0	0	0	0	0	0	0	0	0	0	0	0	0	0	0	0	0	0
21	2017-11-20	1899-12-31 12:00:00	48	0	0	0	0	0	0	0	0	0	0	0	0	0	0	0	0	0	0	0	0	0	0	0	0	0	1	0	0	1	0	0	0	0	0	0	0	0	0	0	0	0	0	0	0	0	0
22	2017-11-22	1899-12-31 12:00:00	50	0	0	0	0	0	0	0	0	0	0	0	0	0	0	0	0	0	0	0	0	0	0	0	0	0	0	0	0	0	0	0	0	0	0	0	0	0	0	0	0	0	0	0	0	0	0
23	2017-11-24	1899-12-31 12:00:00	52	0	0	0	0	0	0	0	0	0	0	0	0	0	0	0	0	0	0	0	0	0	0	0	0	0	0	0	0	0	0	0	0	0	0	0	0	0	0	0	0	0	0	0	0	0	0
24	2017-11-27	1899-12-31 12:00:00	55	0	0	0	0	0	0	0	0	0	0	0	0	0	0	0	0	0	0	0	0	0	0	0	0	0	0	0	0	0	0	0	0	0	0	0	0	0	0	0	0	0	0	0	0	0	0
25	2017-11-29	1899-12-31 12:00:00	57	0	0	0	0	0	0	0	0	0	0	0	0	0	0	0	0	0	0	0	0	0	0	0	0	0	0	0	0	0	0	0	0	0	0	0	0	0	0	0	0	0	0	0	0	0	0
26	2017-12-01	1899-12-31 12:00:00	59	0	0	0	0	0	0	0	0	0	0	0	0	0	0	0	0	0	0	0	0	0	0	0	0	0	0	0	0	0	0	0	0	0	0	0	0	0	0	0	0	0	0	0	0	0	0
27	2017-12-04	1899-12-31 12:00:00	62	0	0	0	0	0	0	0	0	0	0	0	0	0	0	0	0	0	0	0	0	0	0	0	0	0	0	0	0	0	0	0	0	0	0	0	0	0	0	0	0	0	0	0	0	0	0
28	2017-12-06	1899-12-31 12:00:00	64	0	0	0	0	0	0	0	0	0	0	0	0	0	0	0	0	0	0	0	0	0	0	0	0	0	0	0	0	0	0	0	0	0	0	0	0	0	0	0	0	0	0	0	0	0	0
29	2017-12-08	1899-12-31 12:00:00	66	0	0	0	0	0	0	0	0	0	0	0	0	0	0	0	0	0	0	0	0	0	0	0	0	0	0	0	0	0	0	0	0	0	0	0	0	0	0	0	0	0	0	0	0	0	0
30	2017-12-11	1899-12-31 12:00:00	69	0	0	0	0	0	0	0	0	0	0	0	0	0	0	0	0	0	0	0	0	0	0	0	0	0	0	0	0	0	0	0	0	0	0	0	0	0	0	0	0	0	0	0	0	0	0
31	2017-12-13	1899-12-31 12:00:00	71	0	0	0	0	0	0	0	0	0	0	0	0	0	0	0	0	0	0	0	0	0	0	0	0	0	0	0	0	0	0	0	0	0	0	0	0	0	0	0	0	0	0	0	0	0	0
32	2017-12-15	1899-12-31 12:00:00	73	0	0	0	0	0	0	0	0	0	0	0	0	0	0	0	0	0	0	0	0	0	0	0	0	1	0	0	0	0	0	0	0	0	0	0	0	0	0	0	0	0	0	0	0	0	0
33	2017-12-18	1899-12-31 12:00:00	76	0	0	0	0	0	0	0	0	0	0	0	0	0	0	0	0	0	0	0	0	0	0	0	0	0	0	0	0	0	0	0	0	0	0	0	0	0	0	0	0	0	0	0	0	0	0
34	2017-12-20	1899-12-31 12:00:00	78	0	0	0	0	0	0	0	0	0	0	0	0	0	0	0	0	0	0	0	0	0	0	0	0	0	0	0	0	0	0	0	0	0	0	0	0	0	0	0	0	0	0	0	0	0	0
35	2017-12-22	1899-12-31 12:00:00	80	0	0	0	0	0	0	0	0	0	0	0	0	0	0	0	0	0	0	0	0	0	0	0	0	0	0	0	0	0	0	0	0	0	0	0	0	0	0	0	0	0	0	0	0	0	0
36	2017-12-24	1899-12-31 12:00:00	82	0	0	0	0	0	0	0	0	0	0	0	0	0	0	0	0	0	0	0	0	0	0	0	0	0	0	0	0	0	0	0	0	0	0	0	0	0	0	0	0	0	0	0	0	0	0
37	2017-12-27	1899-12-31 12:00:00	85	0	0	0	0	0	0	0	0	0	0	0	0	0	0	0	0	0	0	0	0	0	0	0	0	0	0	0	0	0	0	0	0	0	0	0	0	0	0	0	0	0	0	0	0	0	0
38	2017-12-30	1899-12-31 12:00:00	88	0	0	0	0	0	0	0	0	0	0	0	0	0	0	0	0	0	0	0	0	0	0	0	0	0	0	0	0	0	0	0	0	0	0	0	0	0	0	0	0	0	0	0	0	0	0
39	2018-01-02	1899-12-31 12:00:00	91	0	0	0	0	0	0	0	0	0	0	0	0	0	0	0	0	0	0	0	0	0	0	0	0	0	0	0	0	0	0	0	0	0	0	0	0	0	0	0	0	0	0	0	0	0	0
40	2018-01-04	1899-12-31 12:00:00	93	0	0	0	0	0	0	0	0	0	0	0	0	0	0	0	0	0	0	0	0	0	1	0	0	0	0	0	0	0	0	0	0	0	0	0	0	0	0	0	0	0	0	0	0	0	0
41	2000-01-01	1899-12-31 12:00:00	93	0	0	0	0	0	0	0	0	0	0	0	0	0	0	0	0	0	0	0	0	0	0	0	0	0	0	0	0	0	0	0	0	0	0	0	0	0	0	0	0	0	0	0	0	0	0
42	2000-01-01	1899-12-31 12:00:00	93	0	0	0	0	0	0	0	0	0	0	0	0	0	0	0	0	0	0	0	0	0	0	0	0	0	0	0	0	0	0	0	0	0	0	0	0	0	0	0	0	0	0	0	0	0	0
43	2000-01-01	1899-12-31 12:00:00	93	0	0	0	0	0	0	0	0	0	0	0	0	0	0	0	0	0	0	0	0	0	0	0	0	0	0	0	0	0	0	0	0	0	0	0	0	0	0	0	0	0	0	0	0	0	0
44	2000-01-01	1899-12-31 12:00:00	93	0	0	0	0	0	0	0	0	0	0	0	0	0	0	0	0	0	0	0	0	0	0	0	0	0	0	0	0	0	0	0	0	0	0	0	0	0	0	0	0	0	0	0	0	0	0
45	2000-01-01	1899-12-31 12:00:00	93	0	0	0	0	0	0	0	0	0	0	0	0	0	0	0	0	0	0	0	0	0	0	0	0	0	0	0	0	0	0	0	0	0	0	0	0	0	0	0	0	0	0	0	0	0	0
46	2000-01-01	1899-12-31 12:00:00	93	0	0	0	0	0	0	0	0	0	0	0	0	0	0	0	0	0	0	0	0	0	0	0	0	0	0	0	0	0	0	0	0	0	0	0	0	0	0	0	0	0	0	0	0	0	0
47	2000-01-01	1899-12-31 12:00:00	93	0	0	0	0	0	0	0	0	0	0	0	0	0	0	0	0	0	0	0	0	0	0	0	0	0	0	0	0	0	0	0	0	0	0	0	0	0	0	0	0	0	0	0	0	0	0
48	2000-01-01	1899-12-31 12:00:00	93	0	0	0	0	0	0	0	0	0	0	0	0	0	0	0	0	0	0	0	0	0	0	0	0	0	0	0	0	0	0	0	0	0	0	0	0	0	0	0	0	0	0	0	0	0	0
49	2000-01-01	1899-12-31 12:00:00	93	0	0	0	0	0	0	0	0	0	0	0	0	0	0	0	0	0	0	0	0	0	0	0	0	0	0	0	0	0	0	0	0	0	0	0	0	0	0	0	0	0	0	0	0	0	0
50	2000-01-01	1899-12-31 12:00:00	93	0	0	0	0	0	0	0	0	0	0	0	0	0	0	0	0	0	0	0	0	0	0	0	0	0	0	0	0	0	0	0	0	0	0	0	0	0	0	0	0	0	0	0	0	0	0
51	2000-01-01	1899-12-31 12:00:00	93	0	0	0	0	0	0	0	0	0	0	0	0	0	0	0	0	0	0	0	0	0	0	0	0	0	0	0	0	0	0	0	0	0	0	0	0	0	0	0	0	0	0	0	0	0	0
52	2000-01-01	1899-12-31 12:00:00	93	0	0	0	0	0	0	0	0	0	0	0	0	0	0	0	0	0	0	0	0	0	0	0	0	0	0	0	0	0	0	0	0	0	0	0	0	0	0	0	0	0	0	0	0	0	0
53	2000-01-01	1899-12-31 12:00:00	93	0	0	0	0	0	0	0	0	0	0	0	0	0	0	0	0	0	0	0	0	0	0	0	0	0	0	0	0	0	0	0	0	0	0	0	0	0	0	0	0	0	0	0	0	0	0
54	2000-01-01	1899-12-31 12:00:00	93	0	0	0	0	0	0	0	0	0	0	0	0	0	0	0	0	0	0	0	0	0	0	0	0	0	0	0	0	0	0	0	0	0	0	0	0	0	0	0	0	0	0	0	0	0	0
55	2000-01-01	1899-12-31 12:00:00	93	0	0	0	0	0	0	0	0	0	0	0	0	0	0	0	0	0	0	0	0	0	0	0	0	0	0	0	0	0	0	0	0	0	0	0	0	0	0	0	0	0	0	0	0	0	0
56	2000-01-01	1899-12-31 12:00:00	93	0	0	0	0	0	0	0	0	0	0	0	0	0	0	0	0	0	0	0	0	0	0	0	0	0	0	0	0	0	0	0	0	0	0	0	0	0	0	0	0	0	0	0	0	0	0
57	2000-01-01	1899-12-31 12:00:00	93	0	0	0	0	0	0	0	0	0	0	0	0	0	0	0	0	0	0	0	0	0	0	0	0	0	0	0	0	0	0	0	0	0	0	0	0	0	0	0	0	0	0	0	0	0	0
58	2000-01-01	1899-12-31 12:00:00	93	0	0	0	0	0	0	0	0	0	0	0	0	0	0	0	0	0	0	0	0	0	0	0	0	0	0	0	0	0	0	0	0	0	0	0	0	0	0	0	0	0	0	0	0	0	0
59	2000-01-01	1899-12-31 12:00:00	93	0	0	0	0	0	0	0	0	0	0	0	0	0	0	0	0	0	0	0	0	0	0	0	0	0	0	0	0	0	0	0	0	0	0	0	0	0	0	0	0	0	0	0	0	0	0
60	2000-01-01	1899-12-31 12:00:00	93	0	0	0	0	0	0	0	0	0	0	0	0	0	0	0	0	0	0	0	0	0	0	0	0	0	0	0	0	0	0	0	0	0	0	0	0	0	0	0	0	0	0	0	0	0	0
61	2000-01-01	1899-12-31 12:00:00	93	0	0	0	0	0	0	0	0	0	0	0	0	0	0	0	0	0	0	0	0	0	0	0	0	0	0	0	0	0	0	0	0	0	0	0	0	0	0	0	0	0	0	0	0	0	0
62	2000-01-01	1899-12-31 12:00:00	93	0	0	0	0	0	0	0	0	0	0	0	0	0	0	0	0	0	0	0	0	0	0	0	0	0	0	0	0	0	0	0	0	0	0	0	0	0	0	0	0	0	0	0	0	0	0
63	2000-01-01	1899-12-31 12:00:00	93	0	0	0	0	0	0	0	0	0	0	0	0	0	0	0	0	0	0	0	0	0	0	0	0	0	0	0	0	0	0	0	0	0	0	0	0	0	0	0	0	0	0	0	0	0	0
64	2000-01-01	1899-12-31 12:00:00	93	0	0	0	0	0	0	0	0	0	0	0	0	0	0	0	0	0	0	0	0	0	0	0	0	0	0	0	0	0	0	0	0	0	0	0	0	0	0	0	0	0	0	0	0	0	0
65	2000-01-01	1899-12-31 12:00:00	93	0	0	0	0	0	0	0	0	0	0	0	0	0	0	0	0	0	0	0	0	0	0	0	0	0	0	0	0	0	0	0	0	0	0	0	0	0	0	0	0	0	0	0	0	0	0
66	2000-01-01	1899-12-31 12:00:00	93	0	0	0	0	0	0	0	0	0	0	0	0	0	0	0	0	0	0	0	0	0	0	0	0	0	0	0	0	0	0	0	0	0	0	0	0	0	0	0	0	0	0	0	0	0	0
67	2000-01-01	1899-12-31 12:00:00	93	0	0	0	0	0	0	0	0	0	0	0	0	0	0	0	0	0	0	0	0	0	0	0	0	0	0	0	0	0	0	0	0	0	0	0	0	0	0	0	0	0	0	0	0	0	0
68	2000-01-01	1899-12-31 12:00:00	93	0	0	0	0	0	0	0	0	0	0	0	0	0	0	0	0	0	0	0	0	0	0	0	0	0	0	0	0	0	0	0	0	0	0	0	0	0	0	0	0	0	0	0	0	0	0
69	2000-01-01	1899-12-31 12:00:00	93	0	0	0	0	0	0	0	0	0	0	0	0	0	0	0	0	0	0	0	0	0	0	0	0	0	0	0	0	0	0	0	0	0	0	0	0	0	0	0	0	0	0	0	0	0	0
70	2000-01-01	1899-12-31 12:00:00	93	0	0	0	0	0	0	0	0	0	0	0	0	0	0	0	0	0	0	0	0	0	0	0	0	0	0	0	0	0	0	0	0	0	0	0	0	0	0	0	0	0	0	0	0	0	0
71	2000-01-01	1899-12-31 12:00:00	93	0	0	0	0	0	0	0	0	0	0	0	0	0	0	0	0	0	0	0	0	0	0	0	0	0	0	0	0	0	0	0	0	0	0	0	0	0	0	0	0	0	0	0	0	0	0
72	2000-01-01	1899-12-31 12:00:00	93	0	0	0	0	0	0	0	0	0	0	0	0	0	0	0	0	0	0	0	0	0	0	0	0	0	0	0	0	0	0	0	0	0	0	0	0	0	0	0	0	0	0	0	0	0	0
73	2000-01-01	1899-12-31 12:00:00	93	0	0	0	0	0	0	0	0	0	0	0	0	0	0	0	0	0	0	0	0	0	0	0	0	0	0	0	0	0	0	0	0	0	0	0	0	0	0	0	0	0	0	0	0	0	0
74	2000-01-01	1899-12-31 12:00:00	93	0	0	0	0	0	0	0	0	0	0	0	0	0	0	0	0	0	0	0	0	0	0	0	0	0	0	0	0	0	0	0	0	0	0	0	0	0	0	0	0	0	0	0	0	0	0
75	2000-01-01	1899-12-31 12:00:00	93	0	0	0	0	0	0	0	0	0	0	0	0	0	0	0	0	0	0	0	0	0	0	0	0	0	0	0	0	0	0	0	0	0	0	0	0	0	0	0	0	0	0	0	0	0	0
				3	0	2	1	0	1	0	2	3	1	0	0	0	0	0	0	0	0	0	0	1	7	2	0	1	1	0	0	1	0	0	0	0	0	0	0	0	0	0	0	0	1	0	1	0	4
[truncated: 154 more columns]

## Sheet: Nx per bottle
			deaths
				bottle number
	date	time	day	1	2	3	4	5	6	7	8	9	10	11	12	13	14	15	16	17	18	19	20	21	22	23	24	25	26	27	28	29	30	31	32	33	34	35	36	37	38	39	40	41	42	43	44	45	46
0	2017-10-03	1899-12-31 12:00:00	0	15	15	15	15	15	15	15	15	15	15	15	15	15	15	15	15	15	15	15	15	15	15	15	15	15	15	15	15	15	15	15	15	15	15	15	15	15	15	15	15	15	15	15	15	15	15
1	2017-10-04	1899-12-31 12:00:00	1	15	15	15	15	15	15	15	14	15	15	15	15	15	15	15	15	15	15	15	15	15	15	14	15	15	15	15	15	15	15	15	15	15	15	15	15	15	15	15	15	15	15	15	14	15	15
2	2017-10-06	1899-12-31 12:00:00	3	15	15	15	14	15	15	15	14	15	15	15	15	15	15	15	15	15	15	15	15	14	15	13	15	15	15	15	15	15	15	15	15	15	15	15	15	15	15	15	15	15	15	15	14	15	15
3	2017-10-09	1899-12-31 12:00:00	6	15	14	15	13	15	15	15	13	15	15	15	15	15	15	15	15	15	15	15	15	14	15	13	15	15	15	15	15	15	15	15	15	15	15	15	15	15	15	15	15	15	15	15	14	15	15
4	2017-10-11	1899-12-31 12:00:00	8	15	14	15	13	15	15	15	13	15	15	15	15	15	15	15	15	15	15	15	15	13	15	13	15	15	15	15	15	15	15	15	15	15	15	15	15	15	15	15	15	15	15	15	14	14	15
5	2017-10-14	1899-12-31 12:00:00	11	13	13	14	11	13	12	15	12	13	13	15	15	15	15	15	15	15	15	15	15	13	15	13	15	15	15	15	15	15	15	15	15	15	15	15	15	15	15	15	15	10	12	11	11	10	13
6	2017-10-16	1899-12-31 12:00:00	13	11	12	13	10	13	11	12	11	11	12	15	15	15	15	15	15	15	15	15	15	13	15	13	15	15	15	15	15	15	15	15	15	15	15	15	15	15	15	15	15	9	11	9	11	9	12
7	2017-10-18	1899-12-31 12:00:00	15	9	12	12	9	13	11	12	10	11	11	15	15	15	15	15	15	15	15	15	15	13	15	13	15	15	14	15	15	15	15	15	15	15	15	15	15	15	15	15	15	8	10	8	10	9	10
8	2017-10-20	1899-12-31 12:00:00	17	6	12	8	9	12	11	12	9	11	11	15	15	15	15	15	15	15	15	15	15	13	15	13	15	15	14	15	15	15	15	15	15	15	15	15	15	15	15	15	15	6	9	8	8	8	4
9	2017-10-23	1899-12-31 12:00:00	20	5	9	4	5	11	7	10	4	6	11	15	15	15	15	15	15	15	15	15	15	13	8	13	15	15	14	15	15	15	15	15	15	15	15	15	15	15	15	15	15	5	3	0	5	5	-3
10	2017-10-25	1899-12-31 12:00:00	22	5	9	4	5	10	7	9	4	5	10	15	15	15	15	15	15	15	15	15	15	13	8	13	15	15	14	15	15	15	15	15	15	15	15	15	15	15	15	15	15	5	2	-1	2	3	-3
11	2017-10-27	1899-12-31 12:00:00	24	5	8	3	4	9	5	7	3	4	9	15	15	15	15	15	15	15	15	15	15	13	8	13	15	15	14	15	15	15	15	15	15	15	15	15	15	15	15	15	15	4	0	-1	1	3	-3
12	2017-10-30	1899-12-31 12:00:00	27	1	5	1	3	6	4	3	2	1	6	15	15	15	15	15	15	15	15	15	15	13	8	13	15	15	14	15	15	15	15	15	15	15	15	15	15	15	15	15	15	3	0	-1	0	2	-3
13	2017-11-01	1899-12-31 12:00:00	29	1	4	1	3	6	4	3	0	0	5	15	15	15	15	15	15	15	15	15	15	13	8	13	15	15	14	15	15	15	15	15	15	15	15	15	15	15	15	15	15	3	0	-1	0	2	-3
14	2017-11-03	1899-12-31 12:00:00	31	0	4	1	3	6	4	3	0	0	5	15	15	15	15	15	15	15	15	15	15	13	8	13	15	15	14	15	15	15	15	15	15	15	15	15	15	15	15	15	15	3	0	-1	0	2	-3
15	2017-11-06	1899-12-31 12:00:00	34	0	3	1	3	5	4	3	0	0	3	15	15	15	15	15	15	15	15	15	15	13	8	13	15	15	14	15	15	15	15	15	15	15	15	15	15	15	15	15	15	1	0	-1	0	2	-3
16	2017-11-08	1899-12-31 12:00:00	36	0	3	1	3	5	4	3	0	0	2	15	15	15	15	15	15	15	15	15	15	13	8	13	15	15	14	15	15	15	15	15	15	15	15	15	15	15	15	15	15	1	0	-1	0	2	-3
17	2017-11-10	1899-12-31 12:00:00	38	0	3	1	3	5	4	3	0	0	2	15	15	15	15	15	15	15	15	15	15	13	8	12	15	15	14	15	15	15	15	15	15	15	15	15	15	15	15	15	15	1	0	-2	0	2	-3
18	2017-11-13	1899-12-31 12:00:00	41	0	3	1	3	4	4	3	-1	0	2	15	15	15	15	15	15	15	15	15	15	13	8	12	15	15	14	15	15	15	15	15	15	15	15	15	15	15	15	15	15	1	0	-2	0	2	-3
19	2017-11-15	1899-12-31 12:00:00	43	0	3	1	3	4	4	3	-1	0	2	15	15	15	15	15	15	15	15	15	15	13	8	12	15	15	14	15	15	15	15	15	15	15	15	15	15	15	15	15	15	1	0	-2	0	2	-3
20	2017-11-17	1899-12-31 12:00:00	45	0	3	1	3	3	4	3	-1	0	2	15	15	15	15	15	15	15	15	15	15	13	8	12	15	15	14	15	15	15	15	15	15	15	15	15	15	15	15	15	15	0	0	-2	0	2	-3
21	2017-11-20	1899-12-31 12:00:00	48	0	2	1	1	3	4	3	-1	0	1	15	15	15	15	15	15	15	15	15	15	13	8	12	15	15	13	15	15	14	15	15	15	15	15	15	15	15	15	15	15	0	0	-2	0	2	-3
22	2017-11-22	1899-12-31 12:00:00	50	-1	2	1	1	3	4	3	-1	0	1	15	15	15	15	15	15	15	15	15	15	13	8	12	15	15	13	15	15	14	15	15	15	15	15	15	15	15	15	15	15	0	0	-2	0	2	-3
23	2017-11-24	1899-12-31 12:00:00	52	-1	2	1	1	3	4	3	-1	0	1	15	15	15	15	15	15	15	15	15	15	13	8	12	15	15	13	15	15	14	15	15	15	15	15	15	15	15	15	15	15	0	0	-2	0	2	-3
24	2017-11-27	1899-12-31 12:00:00	55	-1	2	1	1	3	4	3	-1	0	1	15	15	15	15	15	15	15	15	15	15	13	7	12	14	15	13	14	15	14	15	15	15	15	15	15	15	15	15	15	15	0	0	-2	0	2	-3
25	2017-11-29	1899-12-31 12:00:00	57	-1	2	1	1	3	4	3	-1	0	1	15	15	15	15	15	15	15	15	15	15	13	7	12	14	15	13	14	15	14	15	15	15	15	15	15	15	15	15	15	15	0	0	-2	0	2	-3
26	2017-12-01	1899-12-31 12:00:00	59	-1	2	1	1	3	4	3	-1	0	1	15	15	15	15	15	15	15	15	15	15	13	7	12	14	15	11	14	15	14	15	15	15	15	15	15	15	15	15	15	15	0	0	-2	0	2	-3
27	2017-12-04	1899-12-31 12:00:00	62	-1	2	1	1	3	4	3	-1	0	1	15	15	15	15	15	15	15	15	15	15	13	7	11	14	15	11	14	12	13	15	15	15	15	15	15	15	15	15	15	15	0	0	-2	0	2	-3
28	2017-12-06	1899-12-31 12:00:00	64	-1	2	1	1	3	4	3	-1	0	1	15	15	15	15	15	15	15	15	15	15	12	7	11	14	15	11	13	11	13	13	15	15	15	15	15	15	15	15	15	15	0	0	-2	0	2	-3
29	2017-12-08	1899-12-31 12:00:00	66	-1	2	1	1	3	4	3	-1	0	1	15	15	15	15	15	15	15	15	15	15	10	7	11	14	14	11	13	11	13	13	15	15	15	15	15	15	15	15	15	15	0	0	-2	0	2	-3
30	2017-12-11	1899-12-31 12:00:00	69	-1	1	1	1	3	4	2	-2	0	1	15	15	15	15	15	15	15	15	15	15	8	6	8	5	8	6	4	2	10	8	15	15	15	15	15	15	15	15	15	15	0	0	-2	0	2	-3
31	2017-12-13	1899-12-31 12:00:00	71	-1	1	1	1	3	4	2	-2	0	1	15	15	15	15	15	15	15	15	15	15	8	6	6	5	7	6	4	2	10	8	15	15	15	15	15	15	15	15	15	15	0	0	-2	0	2	-3
32	2017-12-15	1899-12-31 12:00:00	73	-1	1	1	1	3	4	2	-2	0	0	15	15	15	15	15	15	15	15	15	15	7	6	5	5	6	4	4	2	10	6	15	15	15	15	15	15	15	15	15	15	0	0	-2	0	2	-3
33	2017-12-18	1899-12-31 12:00:00	76	-1	0	1	0	3	4	1	-2	0	-1	15	15	15	15	15	15	15	15	15	15	4	3	3	2	3	2	2	2	7	3	15	15	15	15	15	15	15	15	15	15	0	0	-2	0	2	-3
34	2017-12-20	1899-12-31 12:00:00	78	-1	0	1	0	3	4	1	-2	0	-1	15	15	15	15	15	15	15	15	15	15	4	3	3	2	3	2	2	2	6	3	15	15	15	15	15	15	15	15	15	15	0	0	-2	0	2	-3
35	2017-12-22	1899-12-31 12:00:00	80	-1	0	1	0	3	4	1	-2	0	-1	15	15	15	15	15	15	15	15	15	15	4	3	3	2	3	2	2	0	6	2	15	15	15	15	15	15	15	15	15	15	0	0	-2	0	2	-3
36	2017-12-24	1899-12-31 12:00:00	82	-1	0	1	0	2	1	-1	-2	0	-1	15	15	15	15	15	15	15	15	15	15	1	3	-2	0	2	1	1	-1	3	0	15	15	15	15	15	15	15	15	15	15	0	0	-2	0	2	-3
37	2017-12-27	1899-12-31 12:00:00	85	-1	0	1	0	2	1	-1	-2	0	-1	15	15	15	15	15	15	15	15	15	15	0	3	-2	-1	0	0	0	-1	2	-1	15	15	15	15	15	15	15	15	15	15	0	0	-2	0	2	-3
38	2017-12-30	1899-12-31 12:00:00	88	-1	0	1	0	1	0	-1	-2	-1	-1	15	15	15	15	15	15	15	15	15	15	0	3	-2	-1	0	0	0	-1	1	-1	15	15	15	15	15	15	15	15	15	15	0	0	-2	0	2	-3
39	2018-01-02	1899-12-31 12:00:00	91	-1	0	1	0	1	0	-1	-2	-1	-1	15	15	15	15	15	15	15	15	15	15	0	2	-2	-1	0	0	0	-1	1	-1	15	15	15	15	15	15	15	15	15	15	0	0	-2	0	2	-3
40	2018-01-04	1899-12-31 12:00:00	93	-1	0	1	0	1	0	-1	-2	-1	-1	15	15	15	15	15	15	15	15	15	15	0	1	-2	-1	0	0	0	-1	1	-1	15	15	15	15	15	15	15	15	15	15	0	0	-2	0	2	-3
41	2000-01-01	1899-12-31 12:00:00	93	-1	0	1	0	1	0	-1	-2	-1	-1	15	15	15	15	15	15	15	15	15	15	0	1	-2	-1	0	0	0	-1	1	-1	15	15	15	15	15	15	15	15	15	15	0	0	-2	0	2	-3
42	2000-01-01	1899-12-31 12:00:00	93	-1	0	1	0	1	0	-1	-2	-1	-1	15	15	15	15	15	15	15	15	15	15	0	1	-2	-1	0	0	0	-1	1	-1	15	15	15	15	15	15	15	15	15	15	0	0	-2	0	2	-3
43	2000-01-01	1899-12-31 12:00:00	93	-1	0	1	0	1	0	-1	-2	-1	-1	15	15	15	15	15	15	15	15	15	15	0	1	-2	-1	0	0	0	-1	1	-1	15	15	15	15	15	15	15	15	15	15	0	0	-2	0	2	-3
44	2000-01-01	1899-12-31 12:00:00	93	-1	0	1	0	1	0	-1	-2	-1	-1	15	15	15	15	15	15	15	15	15	15	0	1	-2	-1	0	0	0	-1	1	-1	15	15	15	15	15	15	15	15	15	15	0	0	-2	0	2	-3
45	2000-01-01	1899-12-31 12:00:00	93	-1	0	1	0	1	0	-1	-2	-1	-1	15	15	15	15	15	15	15	15	15	15	0	1	-2	-1	0	0	0	-1	1	-1	15	15	15	15	15	15	15	15	15	15	0	0	-2	0	2	-3
46	2000-01-01	1899-12-31 12:00:00	93	-1	0	1	0	1	0	-1	-2	-1	-1	15	15	15	15	15	15	15	15	15	15	0	1	-2	-1	0	0	0	-1	1	-1	15	15	15	15	15	15	15	15	15	15	0	0	-2	0	2	-3
47	2000-01-01	1899-12-31 12:00:00	93	-1	0	1	0	1	0	-1	-2	-1	-1	15	15	15	15	15	15	15	15	15	15	0	1	-2	-1	0	0	0	-1	1	-1	15	15	15	15	15	15	15	15	15	15	0	0	-2	0	2	-3
48	2000-01-01	1899-12-31 12:00:00	93	-1	0	1	0	1	0	-1	-2	-1	-1	15	15	15	15	15	15	15	15	15	15	0	1	-2	-1	0	0	0	-1	1	-1	15	15	15	15	15	15	15	15	15	15	0	0	-2	0	2	-3
49	2000-01-01	1899-12-31 12:00:00	93	-1	0	1	0	1	0	-1	-2	-1	-1	15	15	15	15	15	15	15	15	15	15	0	1	-2	-1	0	0	0	-1	1	-1	15	15	15	15	15	15	15	15	15	15	0	0	-2	0	2	-3
50	2000-01-01	1899-12-31 12:00:00	93	-1	0	1	0	1	0	-1	-2	-1	-1	15	15	15	15	15	15	15	15	15	15	0	1	-2	-1	0	0	0	-1	1	-1	15	15	15	15	15	15	15	15	15	15	0	0	-2	0	2	-3
51	2000-01-01	1899-12-31 12:00:00	93	-1	0	1	0	1	0	-1	-2	-1	-1	15	15	15	15	15	15	15	15	15	15	0	1	-2	-1	0	0	0	-1	1	-1	15	15	15	15	15	15	15	15	15	15	0	0	-2	0	2	-3
52	2000-01-01	1899-12-31 12:00:00	93	-1	0	1	0	1	0	-1	-2	-1	-1	15	15	15	15	15	15	15	15	15	15	0	1	-2	-1	0	0	0	-1	1	-1	15	15	15	15	15	15	15	15	15	15	0	0	-2	0	2	-3
53	2000-01-01	1899-12-31 12:00:00	93	-1	0	1	0	1	0	-1	-2	-1	-1	15	15	15	15	15	15	15	15	15	15	0	1	-2	-1	0	0	0	-1	1	-1	15	15	15	15	15	15	15	15	15	15	0	0	-2	0	2	-3
54	2000-01-01	1899-12-31 12:00:00	93	-1	0	1	0	1	0	-1	-2	-1	-1	15	15	15	15	15	15	15	15	15	15	0	1	-2	-1	0	0	0	-1	1	-1	15	15	15	15	15	15	15	15	15	15	0	0	-2	0	2	-3
55	2000-01-01	1899-12-31 12:00:00	93	-1	0	1	0	1	0	-1	-2	-1	-1	15	15	15	15	15	15	15	15	15	15	0	1	-2	-1	0	0	0	-1	1	-1	15	15	15	15	15	15	15	15	15	15	0	0	-2	0	2	-3
56	2000-01-01	1899-12-31 12:00:00	93	-1	0	1	0	1	0	-1	-2	-1	-1	15	15	15	15	15	15	15	15	15	15	0	1	-2	-1	0	0	0	-1	1	-1	15	15	15	15	15	15	15	15	15	15	0	0	-2	0	2	-3
57	2000-01-01	1899-12-31 12:00:00	93	-1	0	1	0	1	0	-1	-2	-1	-1	15	15	15	15	15	15	15	15	15	15	0	1	-2	-1	0	0	0	-1	1	-1	15	15	15	15	15	15	15	15	15	15	0	0	-2	0	2	-3
58	2000-01-01	1899-12-31 12:00:00	93	-1	0	1	0	1	0	-1	-2	-1	-1	15	15	15	15	15	15	15	15	15	15	0	1	-2	-1	0	0	0	-1	1	-1	15	15	15	15	15	15	15	15	15	15	0	0	-2	0	2	-3
59	2000-01-01	1899-12-31 12:00:00	93	-1	0	1	0	1	0	-1	-2	-1	-1	15	15	15	15	15	15	15	15	15	15	0	1	-2	-1	0	0	0	-1	1	-1	15	15	15	15	15	15	15	15	15	15	0	0	-2	0	2	-3
60	2000-01-01	1899-12-31 12:00:00	93	-1	0	1	0	1	0	-1	-2	-1	-1	15	15	15	15	15	15	15	15	15	15	0	1	-2	-1	0	0	0	-1	1	-1	15	15	15	15	15	15	15	15	15	15	0	0	-2	0	2	-3
61	2000-01-01	1899-12-31 12:00:00	93	-1	0	1	0	1	0	-1	-2	-1	-1	15	15	15	15	15	15	15	15	15	15	0	1	-2	-1	0	0	0	-1	1	-1	15	15	15	15	15	15	15	15	15	15	0	0	-2	0	2	-3
62	2000-01-01	1899-12-31 12:00:00	93	-1	0	1	0	1	0	-1	-2	-1	-1	15	15	15	15	15	15	15	15	15	15	0	1	-2	-1	0	0	0	-1	1	-1	15	15	15	15	15	15	15	15	15	15	0	0	-2	0	2	-3
63	2000-01-01	1899-12-31 12:00:00	93	-1	0	1	0	1	0	-1	-2	-1	-1	15	15	15	15	15	15	15	15	15	15	0	1	-2	-1	0	0	0	-1	1	-1	15	15	15	15	15	15	15	15	15	15	0	0	-2	0	2	-3
64	2000-01-01	1899-12-31 12:00:00	93	-1	0	1	0	1	0	-1	-2	-1	-1	15	15	15	15	15	15	15	15	15	15	0	1	-2	-1	0	0	0	-1	1	-1	15	15	15	15	15	15	15	15	15	15	0	0	-2	0	2	-3
65	2000-01-01	1899-12-31 12:00:00	93	-1	0	1	0	1	0	-1	-2	-1	-1	15	15	15	15	15	15	15	15	15	15	0	1	-2	-1	0	0	0	-1	1	-1	15	15	15	15	15	15	15	15	15	15	0	0	-2	0	2	-3
66	2000-01-01	1899-12-31 12:00:00	93	-1	0	1	0	1	0	-1	-2	-1	-1	15	15	15	15	15	15	15	15	15	15	0	1	-2	-1	0	0	0	-1	1	-1	15	15	15	15	15	15	15	15	15	15	0	0	-2	0	2	-3
67	2000-01-01	1899-12-31 12:00:00	93	-1	0	1	0	1	0	-1	-2	-1	-1	15	15	15	15	15	15	15	15	15	15	0	1	-2	-1	0	0	0	-1	1	-1	15	15	15	15	15	15	15	15	15	15	0	0	-2	0	2	-3
68	2000-01-01	1899-12-31 12:00:00	93	-1	0	1	0	1	0	-1	-2	-1	-1	15	15	15	15	15	15	15	15	15	15	0	1	-2	-1	0	0	0	-1	1	-1	15	15	15	15	15	15	15	15	15	15	0	0	-2	0	2	-3
69	2000-01-01	1899-12-31 12:00:00	93	-1	0	1	0	1	0	-1	-2	-1	-1	15	15	15	15	15	15	15	15	15	15	0	1	-2	-1	0	0	0	-1	1	-1	15	15	15	15	15	15	15	15	15	15	0	0	-2	0	2	-3
70	2000-01-01	1899-12-31 12:00:00	93	-1	0	1	0	1	0	-1	-2	-1	-1	15	15	15	15	15	15	15	15	15	15	0	1	-2	-1	0	0	0	-1	1	-1	15	15	15	15	15	15	15	15	15	15	0	0	-2	0	2	-3
71	2000-01-01	1899-12-31 12:00:00	93	-1	0	1	0	1	0	-1	-2	-1	-1	15	15	15	15	15	15	15	15	15	15	0	1	-2	-1	0	0	0	-1	1	-1	15	15	15	15	15	15	15	15	15	15	0	0	-2	0	2	-3
72	2000-01-01	1899-12-31 12:00:00	93	-1	0	1	0	1	0	-1	-2	-1	-1	15	15	15	15	15	15	15	15	15	15	0	1	-2	-1	0	0	0	-1	1	-1	15	15	15	15	15	15	15	15	15	15	0	0	-2	0	2	-3
73	2000-01-01	1899-12-31 12:00:00	93	-1	0	1	0	1	0	-1	-2	-1	-1	15	15	15	15	15	15	15	15	15	15	0	1	-2	-1	0	0	0	-1	1	-1	15	15	15	15	15	15	15	15	15	15	0	0	-2	0	2	-3
74	2000-01-01	1899-12-31 12:00:00	93	-1	0	1	0	1	0	-1	-2	-1	-1	15	15	15	15	15	15	15	15	15	15	0	1	-2	-1	0	0	0	-1	1	-1	15	15	15	15	15	15	15	15	15	15	0	0	-2	0	2	-3
75	2000-01-01	1899-12-31 12:00:00	93	-1	0	1	0	1	0	-1	-2	-1	-1	15	15	15	15	15	15	15	15	15	15	0	1	-2	-1	0	0	0	-1	1	-1	15	15	15	15	15	15	15	15	15	15	0	0	-2	0	2	-3
				-1	0	1	0	1	0	-1	-2	-1	-1	15	15	15	15	15	15	15	15	15	15	0	1	-2	-1	0	0	0	-1	1	-1	15	15	15	15	15	15	15	15	15	15	0	0	-2	0	2	-3
[truncated: 154 more columns]

## Sheet: Px per bottle
			deaths
				15	15	15	15	15	15	15	15	15	15	15	15	15	15	15	15	15	15	15	15	15	15	15	15	15	15	15	15	15	15	15	15	15	15	15	15	15	15	15	15	15	15	15	15	15	15
0				16	15	14	15	14	15	16	17	16	16	0	0	0	0	0	0	0	0	0	0	15	14	17	16	15	15	15	16	14	16	0	0	0	0	0	0	0	0	0	0	15	15	17	15	13	18
	date	time	day	1	2	3	4	5	6	7	8	9	10	11	12	13	14	15	16	17	18	19	20	21	22	23	24	25	26	27	28	29	30	31	32	33	34	35	36	37	38	39	40	41	42	43	44	45	46
1	2017-10-04	1899-12-31 12:00:00	1	1	1	1	1	1	1	1	1	1	1	1	1	1	1	1	1	1	1	1	1	1	1	1	1	1	1	1	1	1	1	1	1	1	1	1	1	1	1	1	1	1	1	1	1	1	1
2	2017-10-06	1899-12-31 12:00:00	3	1	1	1	0.933333	1	1	1	1	1	1	1	1	1	1	1	1	1	1	1	1	0.933333	1	0.928571	1	1	1	1	1	1	1	1	1	1	1	1	1	1	1	1	1	1	1	1	1	1	1
3	2017-10-09	1899-12-31 12:00:00	6	1	0.933333	1	0.866667	1	1	1	0.928571	1	1	1	1	1	1	1	1	1	1	1	1	0.933333	1	0.928571	1	1	1	1	1	1	1	1	1	1	1	1	1	1	1	1	1	1	1	1	1	1	1
4	2017-10-11	1899-12-31 12:00:00	8	1	0.933333	1	0.866667	1	1	1	0.928571	1	1	1	1	1	1	1	1	1	1	1	1	0.933333	1	0.928571	1	1	1	1	1	1	1	1	1	1	1	1	1	1	1	1	1	1	1	1	1	0.933333	1
5	2017-10-14	1899-12-31 12:00:00	11	0.866667	0.866667	0.933333	0.8	0.866667	0.866667	1	0.857143	0.866667	0.866667	1	1	1	1	1	1	1	1	1	1	0.933333	1	0.928571	1	1	1	1	1	1	1	1	1	1	1	1	1	1	1	1	1	0.666667	0.8	0.733333	0.785714	0.666667	0.866667
6	2017-10-16	1899-12-31 12:00:00	13	0.733333	0.8	0.866667	0.727273	0.866667	0.794444	0.8	0.785714	0.733333	0.8	1	1	1	1	1	1	1	1	1	1	0.933333	1	0.928571	1	1	1	1	1	1	1	1	1	1	1	1	1	1	1	1	1	0.6	0.733333	0.6	0.785714	0.6	0.8
7	2017-10-18	1899-12-31 12:00:00	15	0.666667	0.8	0.866667	0.654545	0.866667	0.794444	0.8	0.714286	0.733333	0.733333	1	1	1	1	1	1	1	1	1	1	0.933333	1	0.928571	1	1	0.933333	1	1	1	1	1	1	1	1	1	1	1	1	1	1	0.533333	0.666667	0.533333	0.714286	0.6	0.666667
8	2017-10-20	1899-12-31 12:00:00	17	0.518519	0.8	0.65	0.654545	0.8	0.794444	0.8	0.642857	0.733333	0.733333	1	1	1	1	1	1	1	1	1	1	0.933333	1	0.928571	1	1	0.933333	1	1	1	1	1	1	1	1	1	1	1	1	1	1	0.4	0.666667	0.533333	0.571429	0.533333	0.266667
9	2017-10-23	1899-12-31 12:00:00	20	0.518519	0.6	0.325	0.363636	0.733333	0.505556	0.666667	0.357143	0.533333	0.733333	1	1	1	1	1	1	1	1	1	1	0.933333	0.933333	0.928571	1	1	0.933333	1	1	1	1	1	1	1	1	1	1	1	1	1	1	0.333333	0.222222	0	0.357143	0.333333	0.0666667
10	2017-10-25	1899-12-31 12:00:00	22	0.518519	0.6	0.325	0.363636	0.666667	0.505556	0.6	0.357143	0.533333	0.666667	1	1	1	1	1	1	1	1	1	1	0.933333	0.933333	0.928571	1	1	0.933333	1	1	1	1	1	1	1	1	1	1	1	1	1	1	0.333333	0.148148	#DIV/0!	0.142857	0.2	0.0666667
11	2017-10-27	1899-12-31 12:00:00	24	0.518519	0.533333	0.24375	0.290909	0.6	0.361111	0.466667	0.267857	0.426667	0.6	1	1	1	1	1	1	1	1	1	1	0.933333	0.933333	0.928571	1	1	0.933333	1	1	1	1	1	1	1	1	1	1	1	1	1	1	0.266667	0	#DIV/0!	0.0714286	0.2	0.0666667
12	2017-10-30	1899-12-31 12:00:00	27	0.103704	0.333333	0.08125	0.218182	0.4	0.288889	0.2	0.178571	0.106667	0.4	1	1	1	1	1	1	1	1	1	1	0.933333	0.933333	0.928571	1	1	0.933333	1	1	1	1	1	1	1	1	1	1	1	1	1	1	0.2	#DIV/0!	#DIV/0!	0	0.133333	0.0666667
13	2017-11-01	1899-12-31 12:00:00	29	0.103704	0.266667	0.08125	0.218182	0.4	0.288889	0.2	0	0	0.333333	1	1	1	1	1	1	1	1	1	1	0.933333	0.933333	0.928571	1	1	0.933333	1	1	1	1	1	1	1	1	1	1	1	1	1	1	0.2	#DIV/0!	#DIV/0!	#DIV/0!	0.133333	0.0666667
14	2017-11-03	1899-12-31 12:00:00	31	0	0.266667	0.08125	0.218182	0.4	0.288889	0.2	#DIV/0!	#DIV/0!	0.333333	1	1	1	1	1	1	1	1	1	1	0.933333	0.933333	0.928571	1	1	0.933333	1	1	1	1	1	1	1	1	1	1	1	1	1	1	0.2	#DIV/0!	#DIV/0!	#DIV/0!	0.133333	0.0666667
15	2017-11-06	1899-12-31 12:00:00	34	#DIV/0!	0.2	0.08125	0.218182	0.333333	0.288889	0.2	#DIV/0!	#DIV/0!	0.266667	1	1	1	1	1	1	1	1	1	1	0.933333	0.933333	0.928571	1	1	0.933333	1	1	1	1	1	1	1	1	1	1	1	1	1	1	0.0666667	#DIV/0!	#DIV/0!	#DIV/0!	0.133333	0.0666667
16	2017-11-08	1899-12-31 12:00:00	36	#DIV/0!	0.2	0.08125	0.218182	0.333333	0.288889	0.2	#DIV/0!	#DIV/0!	0.177778	1	1	1	1	1	1	1	1	1	1	0.933333	0.933333	0.928571	1	1	0.933333	1	1	1	1	1	1	1	1	1	1	1	1	1	1	0.0666667	#DIV/0!	#DIV/0!	#DIV/0!	0.133333	0.0666667
17	2017-11-10	1899-12-31 12:00:00	38	#DIV/0!	0.2	0.08125	0.218182	0.333333	0.288889	0.2	#DIV/0!	#DIV/0!	0.177778	1	1	1	1	1	1	1	1	1	1	0.933333	0.933333	0.928571	1	1	0.933333	1	1	1	1	1	1	1	1	1	1	1	1	1	1	0.0666667	#DIV/0!	#DIV/0!	#DIV/0!	0.133333	0.0666667
18	2017-11-13	1899-12-31 12:00:00	41	#DIV/0!	0.2	0.08125	0.218182	0.266667	0.288889	0.2	#DIV/0!	#DIV/0!	0.177778	1	1	1	1	1	1	1	1	1	1	0.933333	0.933333	0.928571	1	1	0.933333	1	1	1	1	1	1	1	1	1	1	1	1	1	1	0.0666667	#DIV/0!	#DIV/0!	#DIV/0!	0.133333	0.0666667
19	2017-11-15	1899-12-31 12:00:00	43	#DIV/0!	0.2	0.08125	0.218182	0.266667	0.288889	0.2	#DIV/0!	#DIV/0!	0.177778	1	1	1	1	1	1	1	1	1	1	0.933333	0.933333	0.928571	1	1	0.933333	1	1	1	1	1	1	1	1	1	1	1	1	1	1	0.0666667	#DIV/0!	#DIV/0!	#DIV/0!	0.133333	0.0666667
20	2017-11-17	1899-12-31 12:00:00	45	#DIV/0!	0.2	0.08125	0.218182	0.2	0.288889	0.2	#DIV/0!	#DIV/0!	0.177778	1	1	1	1	1	1	1	1	1	1	0.933333	0.933333	0.928571	1	1	0.933333	1	1	1	1	1	1	1	1	1	1	1	1	1	1	0	#DIV/0!	#DIV/0!	#DIV/0!	0.133333	0.0666667
21	2017-11-20	1899-12-31 12:00:00	48	#DIV/0!	0.133333	0.08125	0.0727273	0.2	0.288889	0.2	#DIV/0!	#DIV/0!	0.0888889	1	1	1	1	1	1	1	1	1	1	0.933333	0.933333	0.928571	1	1	0.933333	1	1	1	1	1	1	1	1	1	1	1	1	1	1	#DIV/0!	#DIV/0!	#DIV/0!	#DIV/0!	0.133333	0.0666667
22	2017-11-22	1899-12-31 12:00:00	50	#DIV/0!	0.133333	0.08125	0.0727273	0.2	0.288889	0.2	#DIV/0!	#DIV/0!	0.0888889	1	1	1	1	1	1	1	1	1	1	0.933333	0.933333	0.928571	1	1	0.933333	1	1	1	1	1	1	1	1	1	1	1	1	1	1	#DIV/0!	#DIV/0!	#DIV/0!	#DIV/0!	0.133333	0.0666667
23	2017-11-24	1899-12-31 12:00:00	52	#DIV/0!	0.133333	0.08125	0.0727273	0.2	0.288889	0.2	#DIV/0!	#DIV/0!	0.0888889	1	1	1	1	1	1	1	1	1	1	0.933333	0.933333	0.928571	1	1	0.933333	1	1	1	1	1	1	1	1	1	1	1	1	1	1	#DIV/0!	#DIV/0!	#DIV/0!	#DIV/0!	0.133333	0.0666667
24	2017-11-27	1899-12-31 12:00:00	55	#DIV/0!	0.133333	0.08125	0.0727273	0.2	0.288889	0.2	#DIV/0!	#DIV/0!	0.0888889	1	1	1	1	1	1	1	1	1	1	0.933333	0.816667	0.928571	0.933333	1	0.933333	0.933333	1	1	1	1	1	1	1	1	1	1	1	1	1	#DIV/0!	#DIV/0!	#DIV/0!	#DIV/0!	0.133333	0.0666667
25	2017-11-29	1899-12-31 12:00:00	57	#DIV/0!	0.133333	0.08125	0.0727273	0.2	0.288889	0.2	#DIV/0!	#DIV/0!	0.0888889	1	1	1	1	1	1	1	1	1	1	0.933333	0.816667	0.928571	0.933333	1	0.933333	0.933333	1	1	1	1	1	1	1	1	1	1	1	1	1	#DIV/0!	#DIV/0!	#DIV/0!	#DIV/0!	0.133333	0.0666667
26	2017-12-01	1899-12-31 12:00:00	59	#DIV/0!	0.133333	0.08125	0.0727273	0.2	0.288889	0.2	#DIV/0!	#DIV/0!	0.0888889	1	1	1	1	1	1	1	1	1	1	0.933333	0.816667	0.928571	0.933333	1	0.789744	0.933333	1	1	1	1	1	1	1	1	1	1	1	1	1	#DIV/0!	#DIV/0!	#DIV/0!	#DIV/0!	0.133333	0.0666667
27	2017-12-04	1899-12-31 12:00:00	62	#DIV/0!	0.133333	0.08125	0.0727273	0.2	0.288889	0.2	#DIV/0!	#DIV/0!	0.0888889	1	1	1	1	1	1	1	1	1	1	0.933333	0.816667	0.85119	0.933333	1	0.789744	0.933333	0.8	0.928571	1	1	1	1	1	1	1	1	1	1	1	#DIV/0!	#DIV/0!	#DIV/0!	#DIV/0!	0.133333	0.0666667
28	2017-12-06	1899-12-31 12:00:00	64	#DIV/0!	0.133333	0.08125	0.0727273	0.2	0.288889	0.2	#DIV/0!	#DIV/0!	0.0888889	1	1	1	1	1	1	1	1	1	1	0.861538	0.816667	0.85119	0.933333	1	0.789744	0.866667	0.733333	0.928571	0.866667	1	1	1	1	1	1	1	1	1	1	#DIV/0!	#DIV/0!	#DIV/0!	#DIV/0!	0.133333	0.0666667
29	2017-12-08	1899-12-31 12:00:00	66	#DIV/0!	0.133333	0.08125	0.0727273	0.2	0.288889	0.2	#DIV/0!	#DIV/0!	0.0888889	1	1	1	1	1	1	1	1	1	1	0.717949	0.816667	0.85119	0.933333	0.933333	0.789744	0.866667	0.733333	0.928571	0.866667	1	1	1	1	1	1	1	1	1	1	#DIV/0!	#DIV/0!	#DIV/0!	#DIV/0!	0.133333	0.0666667
30	2017-12-11	1899-12-31 12:00:00	69	#DIV/0!	0.0666667	0.08125	0.0727273	0.2	0.288889	0.133333	#DIV/0!	#DIV/0!	0.0888889	1	1	1	1	1	1	1	1	1	1	0.574359	0.7	0.619048	0.333333	0.533333	0.430769	0.266667	0.133333	0.714286	0.533333	1	1	1	1	1	1	1	1	1	1	#DIV/0!	#DIV/0!	#DIV/0!	#DIV/0!	0.133333	0.0666667
31	2017-12-13	1899-12-31 12:00:00	71	#DIV/0!	0.0666667	0.08125	0.0727273	0.2	0.288889	0.133333	#DIV/0!	#DIV/0!	0.0888889	1	1	1	1	1	1	1	1	1	1	0.574359	0.7	0.464286	0.333333	0.466667	0.430769	0.266667	0.133333	0.714286	0.533333	1	1	1	1	1	1	1	1	1	1	#DIV/0!	#DIV/0!	#DIV/0!	#DIV/0!	0.133333	0.0666667
32	2017-12-15	1899-12-31 12:00:00	73	#DIV/0!	0.0666667	0.08125	0.0727273	0.2	0.288889	0.133333	#DIV/0!	#DIV/0!	0	1	1	1	1	1	1	1	1	1	1	0.502564	0.7	0.386905	0.333333	0.466667	0.287179	0.266667	0.133333	0.714286	0.4	1	1	1	1	1	1	1	1	1	1	#DIV/0!	#DIV/0!	#DIV/0!	#DIV/0!	0.133333	0.0666667
33	2017-12-18	1899-12-31 12:00:00	76	#DIV/0!	0	0.08125	0	0.2	0.288889	0.0666667	#DIV/0!	#DIV/0!	#DIV/0!	1	1	1	1	1	1	1	1	1	1	0.287179	0.35	0.232143	0.133333	0.233333	0.14359	0.133333	0.133333	0.5	0.2	1	1	1	1	1	1	1	1	1	1	#DIV/0!	#DIV/0!	#DIV/0!	#DIV/0!	0.133333	0.0666667
34	2017-12-20	1899-12-31 12:00:00	78	#DIV/0!	#DIV/0!	0.08125	#DIV/0!	0.2	0.288889	0.0666667	#DIV/0!	#DIV/0!	#DIV/0!	1	1	1	1	1	1	1	1	1	1	0.287179	0.35	0.232143	0.133333	0.233333	0.14359	0.133333	0.133333	0.428571	0.2	1	1	1	1	1	1	1	1	1	1	#DIV/0!	#DIV/0!	#DIV/0!	#DIV/0!	0.133333	0.0666667
35	2017-12-22	1899-12-31 12:00:00	80	#DIV/0!	#DIV/0!	0.08125	#DIV/0!	0.2	0.288889	0.0666667	#DIV/0!	#DIV/0!	#DIV/0!	1	1	1	1	1	1	1	1	1	1	0.287179	0.35	0.232143	0.133333	0.233333	0.14359	0.133333	0	0.428571	0.133333	1	1	1	1	1	1	1	1	1	1	#DIV/0!	#DIV/0!	#DIV/0!	#DIV/0!	0.133333	0.0666667
36	2017-12-24	1899-12-31 12:00:00	82	#DIV/0!	#DIV/0!	0.08125	#DIV/0!	0.133333	0.0722222	-0.0666667	#DIV/0!	#DIV/0!	#DIV/0!	1	1	1	1	1	1	1	1	1	1	0.0717949	0.35	-0.154762	0	0.155556	0.0717949	0.0666667	#DIV/0!	0.214286	0	1	1	1	1	1	1	1	1	1	1	#DIV/0!	#DIV/0!	#DIV/0!	#DIV/0!	0.133333	0.0666667
37	2017-12-27	1899-12-31 12:00:00	85	#DIV/0!	#DIV/0!	0.08125	#DIV/0!	0.133333	0.0722222	-0.0666667	#DIV/0!	#DIV/0!	#DIV/0!	1	1	1	1	1	1	1	1	1	1	0	0.35	-0.154762	#DIV/0!	0	0	0	#DIV/0!	0.142857	#DIV/0!	1	1	1	1	1	1	1	1	1	1	#DIV/0!	#DIV/0!	#DIV/0!	#DIV/0!	0.133333	0.0666667
38	2017-12-30	1899-12-31 12:00:00	88	#DIV/0!	#DIV/0!	0.08125	#DIV/0!	0.0666667	0	-0.0666667	#DIV/0!	#DIV/0!	#DIV/0!	1	1	1	1	1	1	1	1	1	1	#DIV/0!	0.35	-0.154762	#DIV/0!	#DIV/0!	#DIV/0!	#DIV/0!	#DIV/0!	0.0714286	#DIV/0!	1	1	1	1	1	1	1	1	1	1	#DIV/0!	#DIV/0!	#DIV/0!	#DIV/0!	0.133333	0.0666667
39	2018-01-02	1899-12-31 12:00:00	91	#DIV/0!	#DIV/0!	0.08125	#DIV/0!	0.0666667	#DIV/0!	-0.0666667	#DIV/0!	#DIV/0!	#DIV/0!	1	1	1	1	1	1	1	1	1	1	#DIV/0!	0.233333	-0.154762	#DIV/0!	#DIV/0!	#DIV/0!	#DIV/0!	#DIV/0!	0.0714286	#DIV/0!	1	1	1	1	1	1	1	1	1	1	#DIV/0!	#DIV/0!	#DIV/0!	#DIV/0!	0.133333	0.0666667
40	2018-01-04	1899-12-31 12:00:00	93	#DIV/0!	#DIV/0!	0.08125	#DIV/0!	0.0666667	#DIV/0!	-0.0666667	#DIV/0!	#DIV/0!	#DIV/0!	1	1	1	1	1	1	1	1	1	1	#DIV/0!	0.233333	-0.154762	#DIV/0!	#DIV/0!	#DIV/0!	#DIV/0!	#DIV/0!	0.0714286	#DIV/0!	1	1	1	1	1	1	1	1	1	1	#DIV/0!	#DIV/0!	#DIV/0!	#DIV/0!	0.133333	0.0666667
41	2000-01-01	1899-12-31 12:00:00	93	#DIV/0!	#DIV/0!	0.08125	#DIV/0!	0.0666667	#DIV/0!	-0.0666667	#DIV/0!	#DIV/0!	#DIV/0!	1	1	1	1	1	1	1	1	1	1	#DIV/0!	0.233333	-0.154762	#DIV/0!	#DIV/0!	#DIV/0!	#DIV/0!	#DIV/0!	0.0714286	#DIV/0!	1	1	1	1	1	1	1	1	1	1	#DIV/0!	#DIV/0!	#DIV/0!	#DIV/0!	0.133333	0.0666667
42	2000-01-01	1899-12-31 12:00:00	93	#DIV/0!	#DIV/0!	0.08125	#DIV/0!	0.0666667	#DIV/0!	-0.0666667	#DIV/0!	#DIV/0!	#DIV/0!	1	1	1	1	1	1	1	1	1	1	#DIV/0!	0.233333	-0.154762	#DIV/0!	#DIV/0!	#DIV/0!	#DIV/0!	#DIV/0!	0.0714286	#DIV/0!	1	1	1	1	1	1	1	1	1	1	#DIV/0!	#DIV/0!	#DIV/0!	#DIV/0!	0.133333	0.0666667
43	2000-01-01	1899-12-31 12:00:00	93	#DIV/0!	#DIV/0!	0.08125	#DIV/0!	0.0666667	#DIV/0!	-0.0666667	#DIV/0!	#DIV/0!	#DIV/0!	1	1	1	1	1	1	1	1	1	1	#DIV/0!	0.233333	-0.154762	#DIV/0!	#DIV/0!	#DIV/0!	#DIV/0!	#DIV/0!	0.0714286	#DIV/0!	1	1	1	1	1	1	1	1	1	1	#DIV/0!	#DIV/0!	#DIV/0!	#DIV/0!	0.133333	0.0666667
44	2000-01-01	1899-12-31 12:00:00	93	#DIV/0!	#DIV/0!	0.08125	#DIV/0!	0.0666667	#DIV/0!	-0.0666667	#DIV/0!	#DIV/0!	#DIV/0!	1	1	1	1	1	1	1	1	1	1	#DIV/0!	0.233333	-0.154762	#DIV/0!	#DIV/0!	#DIV/0!	#DIV/0!	#DIV/0!	0.0714286	#DIV/0!	1	1	1	1	1	1	1	1	1	1	#DIV/0!	#DIV/0!	#DIV/0!	#DIV/0!	0.133333	0.0666667
45	2000-01-01	1899-12-31 12:00:00	93	#DIV/0!	#DIV/0!	0.08125	#DIV/0!	0.0666667	#DIV/0!	-0.0666667	#DIV/0!	#DIV/0!	#DIV/0!	1	1	1	1	1	1	1	1	1	1	#DIV/0!	0.233333	-0.154762	#DIV/0!	#DIV/0!	#DIV/0!	#DIV/0!	#DIV/0!	0.0714286	#DIV/0!	1	1	1	1	1	1	1	1	1	1	#DIV/0!	#DIV/0!	#DIV/0!	#DIV/0!	0.133333	0.0666667
46	2000-01-01	1899-12-31 12:00:00	93	#DIV/0!	#DIV/0!	0.08125	#DIV/0!	0.0666667	#DIV/0!	-0.0666667	#DIV/0!	#DIV/0!	#DIV/0!	1	1	1	1	1	1	1	1	1	1	#DIV/0!	0.233333	-0.154762	#DIV/0!	#DIV/0!	#DIV/0!	#DIV/0!	#DIV/0!	0.0714286	#DIV/0!	1	1	1	1	1	1	1	1	1	1	#DIV/0!	#DIV/0!	#DIV/0!	#DIV/0!	0.133333	0.0666667
47	2000-01-01	1899-12-31 12:00:00	93	#DIV/0!	#DIV/0!	0.08125	#DIV/0!	0.0666667	#DIV/0!	-0.0666667	#DIV/0!	#DIV/0!	#DIV/0!	1	1	1	1	1	1	1	1	1	1	#DIV/0!	0.233333	-0.154762	#DIV/0!	#DIV/0!	#DIV/0!	#DIV/0!	#DIV/0!	0.0714286	#DIV/0!	1	1	1	1	1	1	1	1	1	1	#DIV/0!	#DIV/0!	#DIV/0!	#DIV/0!	0.133333	0.0666667
48	2000-01-01	1899-12-31 12:00:00	93	#DIV/0!	#DIV/0!	0.08125	#DIV/0!	0.0666667	#DIV/0!	-0.0666667	#DIV/0!	#DIV/0!	#DIV/0!	1	1	1	1	1	1	1	1	1	1	#DIV/0!	0.233333	-0.154762	#DIV/0!	#DIV/0!	#DIV/0!	#DIV/0!	#DIV/0!	0.0714286	#DIV/0!	1	1	1	1	1	1	1	1	1	1	#DIV/0!	#DIV/0!	#DIV/0!	#DIV/0!	0.133333	0.0666667
49	2000-01-01	1899-12-31 12:00:00	93	#DIV/0!	#DIV/0!	0.08125	#DIV/0!	0.0666667	#DIV/0!	-0.0666667	#DIV/0!	#DIV/0!	#DIV/0!	1	1	1	1	1	1	1	1	1	1	#DIV/0!	0.233333	-0.154762	#DIV/0!	#DIV/0!	#DIV/0!	#DIV/0!	#DIV/0!	0.0714286	#DIV/0!	1	1	1	1	1	1	1	1	1	1	#DIV/0!	#DIV/0!	#DIV/0!	#DIV/0!	0.133333	0.0666667
50	2000-01-01	1899-12-31 12:00:00	93	#DIV/0!	#DIV/0!	0.08125	#DIV/0!	0.0666667	#DIV/0!	-0.0666667	#DIV/0!	#DIV/0!	#DIV/0!	1	1	1	1	1	1	1	1	1	1	#DIV/0!	0.233333	-0.154762	#DIV/0!	#DIV/0!	#DIV/0!	#DIV/0!	#DIV/0!	0.0714286	#DIV/0!	1	1	1	1	1	1	1	1	1	1	#DIV/0!	#DIV/0!	#DIV/0!	#DIV/0!	0.133333	0.0666667
51	2000-01-01	1899-12-31 12:00:00	93	#DIV/0!	#DIV/0!	0.08125	#DIV/0!	0.0666667	#DIV/0!	-0.0666667	#DIV/0!	#DIV/0!	#DIV/0!	1	1	1	1	1	1	1	1	1	1	#DIV/0!	0.233333	-0.154762	#DIV/0!	#DIV/0!	#DIV/0!	#DIV/0!	#DIV/0!	0.0714286	#DIV/0!	1	1	1	1	1	1	1	1	1	1	#DIV/0!	#DIV/0!	#DIV/0!	#DIV/0!	0.133333	0.0666667
52	2000-01-01	1899-12-31 12:00:00	93	#DIV/0!	#DIV/0!	0.08125	#DIV/0!	0.0666667	#DIV/0!	-0.0666667	#DIV/0!	#DIV/0!	#DIV/0!	1	1	1	1	1	1	1	1	1	1	#DIV/0!	0.233333	-0.154762	#DIV/0!	#DIV/0!	#DIV/0!	#DIV/0!	#DIV/0!	0.0714286	#DIV/0!	1	1	1	1	1	1	1	1	1	1	#DIV/0!	#DIV/0!	#DIV/0!	#DIV/0!	0.133333	0.0666667
53	2000-01-01	1899-12-31 12:00:00	93	#DIV/0!	#DIV/0!	0.08125	#DIV/0!	0.0666667	#DIV/0!	-0.0666667	#DIV/0!	#DIV/0!	#DIV/0!	1	1	1	1	1	1	1	1	1	1	#DIV/0!	0.233333	-0.154762	#DIV/0!	#DIV/0!	#DIV/0!	#DIV/0!	#DIV/0!	0.0714286	#DIV/0!	1	1	1	1	1	1	1	1	1	1	#DIV/0!	#DIV/0!	#DIV/0!	#DIV/0!	0.133333	0.0666667
54	2000-01-01	1899-12-31 12:00:00	93	#DIV/0!	#DIV/0!	0.08125	#DIV/0!	0.0666667	#DIV/0!	-0.0666667	#DIV/0!	#DIV/0!	#DIV/0!	1	1	1	1	1	1	1	1	1	1	#DIV/0!	0.233333	-0.154762	#DIV/0!	#DIV/0!	#DIV/0!	#DIV/0!	#DIV/0!	0.0714286	#DIV/0!	1	1	1	1	1	1	1	1	1	1	#DIV/0!	#DIV/0!	#DIV/0!	#DIV/0!	0.133333	0.0666667
55	2000-01-01	1899-12-31 12:00:00	93	#DIV/0!	#DIV/0!	0.08125	#DIV/0!	0.0666667	#DIV/0!	-0.0666667	#DIV/0!	#DIV/0!	#DIV/0!	1	1	1	1	1	1	1	1	1	1	#DIV/0!	0.233333	-0.154762	#DIV/0!	#DIV/0!	#DIV/0!	#DIV/0!	#DIV/0!	0.0714286	#DIV/0!	1	1	1	1	1	1	1	1	1	1	#DIV/0!	#DIV/0!	#DIV/0!	#DIV/0!	0.133333	0.0666667
56	2000-01-01	1899-12-31 12:00:00	93	#DIV/0!	#DIV/0!	0.08125	#DIV/0!	0.0666667	#DIV/0!	-0.0666667	#DIV/0!	#DIV/0!	#DIV/0!	1	1	1	1	1	1	1	1	1	1	#DIV/0!	0.233333	-0.154762	#DIV/0!	#DIV/0!	#DIV/0!	#DIV/0!	#DIV/0!	0.0714286	#DIV/0!	1	1	1	1	1	1	1	1	1	1	#DIV/0!	#DIV/0!	#DIV/0!	#DIV/0!	0.133333	0.0666667
57	2000-01-01	1899-12-31 12:00:00	93	#DIV/0!	#DIV/0!	0.08125	#DIV/0!	0.0666667	#DIV/0!	-0.0666667	#DIV/0!	#DIV/0!	#DIV/0!	1	1	1	1	1	1	1	1	1	1	#DIV/0!	0.233333	-0.154762	#DIV/0!	#DIV/0!	#DIV/0!	#DIV/0!	#DIV/0!	0.0714286	#DIV/0!	1	1	1	1	1	1	1	1	1	1	#DIV/0!	#DIV/0!	#DIV/0!	#DIV/0!	0.133333	0.0666667
58	2000-01-01	1899-12-31 12:00:00	93	#DIV/0!	#DIV/0!	0.08125	#DIV/0!	0.0666667	#DIV/0!	-0.0666667	#DIV/0!	#DIV/0!	#DIV/0!	1	1	1	1	1	1	1	1	1	1	#DIV/0!	0.233333	-0.154762	#DIV/0!	#DIV/0!	#DIV/0!	#DIV/0!	#DIV/0!	0.0714286	#DIV/0!	1	1	1	1	1	1	1	1	1	1	#DIV/0!	#DIV/0!	#DIV/0!	#DIV/0!	0.133333	0.0666667
59	2000-01-01	1899-12-31 12:00:00	93	#DIV/0!	#DIV/0!	0.08125	#DIV/0!	0.0666667	#DIV/0!	-0.0666667	#DIV/0!	#DIV/0!	#DIV/0!	1	1	1	1	1	1	1	1	1	1	#DIV/0!	0.233333	-0.154762	#DIV/0!	#DIV/0!	#DIV/0!	#DIV/0!	#DIV/0!	0.0714286	#DIV/0!	1	1	1	1	1	1	1	1	1	1	#DIV/0!	#DIV/0!	#DIV/0!	#DIV/0!	0.133333	0.0666667
60	2000-01-01	1899-12-31 12:00:00	93	#DIV/0!	#DIV/0!	0.08125	#DIV/0!	0.0666667	#DIV/0!	-0.0666667	#DIV/0!	#DIV/0!	#DIV/0!	1	1	1	1	1	1	1	1	1	1	#DIV/0!	0.233333	-0.154762	#DIV/0!	#DIV/0!	#DIV/0!	#DIV/0!	#DIV/0!	0.0714286	#DIV/0!	1	1	1	1	1	1	1	1	1	1	#DIV/0!	#DIV/0!	#DIV/0!	#DIV/0!	0.133333	0.0666667
61	2000-01-01	1899-12-31 12:00:00	93	#DIV/0!	#DIV/0!	0.08125	#DIV/0!	0.0666667	#DIV/0!	-0.0666667	#DIV/0!	#DIV/0!	#DIV/0!	1	1	1	1	1	1	1	1	1	1	#DIV/0!	0.233333	-0.154762	#DIV/0!	#DIV/0!	#DIV/0!	#DIV/0!	#DIV/0!	0.0714286	#DIV/0!	1	1	1	1	1	1	1	1	1	1	#DIV/0!	#DIV/0!	#DIV/0!	#DIV/0!	0.133333	0.0666667
62	2000-01-01	1899-12-31 12:00:00	93	#DIV/0!	#DIV/0!	0.08125	#DIV/0!	0.0666667	#DIV/0!	-0.0666667	#DIV/0!	#DIV/0!	#DIV/0!	1	1	1	1	1	1	1	1	1	1	#DIV/0!	0.233333	-0.154762	#DIV/0!	#DIV/0!	#DIV/0!	#DIV/0!	#DIV/0!	0.0714286	#DIV/0!	1	1	1	1	1	1	1	1	1	1	#DIV/0!	#DIV/0!	#DIV/0!	#DIV/0!	0.133333	0.0666667
63	2000-01-01	1899-12-31 12:00:00	93	#DIV/0!	#DIV/0!	0.08125	#DIV/0!	0.0666667	#DIV/0!	-0.0666667	#DIV/0!	#DIV/0!	#DIV/0!	1	1	1	1	1	1	1	1	1	1	#DIV/0!	0.233333	-0.154762	#DIV/0!	#DIV/0!	#DIV/0!	#DIV/0!	#DIV/0!	0.0714286	#DIV/0!	1	1	1	1	1	1	1	1	1	1	#DIV/0!	#DIV/0!	#DIV/0!	#DIV/0!	0.133333	0.0666667
64	2000-01-01	1899-12-31 12:00:00	93	#DIV/0!	#DIV/0!	0.08125	#DIV/0!	0.0666667	#DIV/0!	-0.0666667	#DIV/0!	#DIV/0!	#DIV/0!	1	1	1	1	1	1	1	1	1	1	#DIV/0!	0.233333	-0.154762	#DIV/0!	#DIV/0!	#DIV/0!	#DIV/0!	#DIV/0!	0.0714286	#DIV/0!	1	1	1	1	1	1	1	1	1	1	#DIV/0!	#DIV/0!	#DIV/0!	#DIV/0!	0.133333	0.0666667
65	2000-01-01	1899-12-31 12:00:00	93	#DIV/0!	#DIV/0!	0.08125	#DIV/0!	0.0666667	#DIV/0!	-0.0666667	#DIV/0!	#DIV/0!	#DIV/0!	1	1	1	1	1	1	1	1	1	1	#DIV/0!	0.233333	-0.154762	#DIV/0!	#DIV/0!	#DIV/0!	#DIV/0!	#DIV/0!	0.0714286	#DIV/0!	1	1	1	1	1	1	1	1	1	1	#DIV/0!	#DIV/0!	#DIV/0!	#DIV/0!	0.133333	0.0666667
66	2000-01-01	1899-12-31 12:00:00	93	#DIV/0!	#DIV/0!	0.08125	#DIV/0!	0.0666667	#DIV/0!	-0.0666667	#DIV/0!	#DIV/0!	#DIV/0!	1	1	1	1	1	1	1	1	1	1	#DIV/0!	0.233333	-0.154762	#DIV/0!	#DIV/0!	#DIV/0!	#DIV/0!	#DIV/0!	0.0714286	#DIV/0!	1	1	1	1	1	1	1	1	1	1	#DIV/0!	#DIV/0!	#DIV/0!	#DIV/0!	0.133333	0.0666667
67	2000-01-01	1899-12-31 12:00:00	93	#DIV/0!	#DIV/0!	0.08125	#DIV/0!	0.0666667	#DIV/0!	-0.0666667	#DIV/0!	#DIV/0!	#DIV/0!	1	1	1	1	1	1	1	1	1	1	#DIV/0!	0.233333	-0.154762	#DIV/0!	#DIV/0!	#DIV/0!	#DIV/0!	#DIV/0!	0.0714286	#DIV/0!	1	1	1	1	1	1	1	1	1	1	#DIV/0!	#DIV/0!	#DIV/0!	#DIV/0!	0.133333	0.0666667
68	2000-01-01	1899-12-31 12:00:00	93	#DIV/0!	#DIV/0!	0.08125	#DIV/0!	0.0666667	#DIV/0!	-0.0666667	#DIV/0!	#DIV/0!	#DIV/0!	1	1	1	1	1	1	1	1	1	1	#DIV/0!	0.233333	-0.154762	#DIV/0!	#DIV/0!	#DIV/0!	#DIV/0!	#DIV/0!	0.0714286	#DIV/0!	1	1	1	1	1	1	1	1	1	1	#DIV/0!	#DIV/0!	#DIV/0!	#DIV/0!	0.133333	0.0666667
69	2000-01-01	1899-12-31 12:00:00	93	#DIV/0!	#DIV/0!	0.08125	#DIV/0!	0.0666667	#DIV/0!	-0.0666667	#DIV/0!	#DIV/0!	#DIV/0!	1	1	1	1	1	1	1	1	1	1	#DIV/0!	0.233333	-0.154762	#DIV/0!	#DIV/0!	#DIV/0!	#DIV/0!	#DIV/0!	0.0714286	#DIV/0!	1	1	1	1	1	1	1	1	1	1	#DIV/0!	#DIV/0!	#DIV/0!	#DIV/0!	0.133333	0.0666667
70	2000-01-01	1899-12-31 12:00:00	93	#DIV/0!	#DIV/0!	0.08125	#DIV/0!	0.0666667	#DIV/0!	-0.0666667	#DIV/0!	#DIV/0!	#DIV/0!	1	1	1	1	1	1	1	1	1	1	#DIV/0!	0.233333	-0.154762	#DIV/0!	#DIV/0!	#DIV/0!	#DIV/0!	#DIV/0!	0.0714286	#DIV/0!	1	1	1	1	1	1	1	1	1	1	#DIV/0!	#DIV/0!	#DIV/0!	#DIV/0!	0.133333	0.0666667
71	2000-01-01	1899-12-31 12:00:00	93	#DIV/0!	#DIV/0!	0.08125	#DIV/0!	0.0666667	#DIV/0!	-0.0666667	#DIV/0!	#DIV/0!	#DIV/0!	1	1	1	1	1	1	1	1	1	1	#DIV/0!	0.233333	-0.154762	#DIV/0!	#DIV/0!	#DIV/0!	#DIV/0!	#DIV/0!	0.0714286	#DIV/0!	1	1	1	1	1	1	1	1	1	1	#DIV/0!	#DIV/0!	#DIV/0!	#DIV/0!	0.133333	0.0666667
72	2000-01-01	1899-12-31 12:00:00	93	#DIV/0!	#DIV/0!	0.08125	#DIV/0!	0.0666667	#DIV/0!	-0.0666667	#DIV/0!	#DIV/0!	#DIV/0!	1	1	1	1	1	1	1	1	1	1	#DIV/0!	0.233333	-0.154762	#DIV/0!	#DIV/0!	#DIV/0!	#DIV/0!	#DIV/0!	0.0714286	#DIV/0!	1	1	1	1	1	1	1	1	1	1	#DIV/0!	#DIV/0!	#DIV/0!	#DIV/0!	0.133333	0.0666667
73	2000-01-01	1899-12-31 12:00:00	93	#DIV/0!	#DIV/0!	0.08125	#DIV/0!	0.0666667	#DIV/0!	-0.0666667	#DIV/0!	#DIV/0!	#DIV/0!	1	1	1	1	1	1	1	1	1	1	#DIV/0!	0.233333	-0.154762	#DIV/0!	#DIV/0!	#DIV/0!	#DIV/0!	#DIV/0!	0.0714286	#DIV/0!	1	1	1	1	1	1	1	1	1	1	#DIV/0!	#DIV/0!	#DIV/0!	#DIV/0!	0.133333	0.0666667
74	2000-01-01	1899-12-31 12:00:00	93	#DIV/0!	#DIV/0!	0.08125	#DIV/0!	0.0666667	#DIV/0!	-0.0666667	#DIV/0!	#DIV/0!	#DIV/0!	1	1	1	1	1	1	1	1	1	1	#DIV/0!	0.233333	-0.154762	#DIV/0!	#DIV/0!	#DIV/0!	#DIV/0!	#DIV/0!	0.0714286	#DIV/0!	1	1	1	1	1	1	1	1	1	1	#DIV/0!	#DIV/0!	#DIV/0!	#DIV/0!	0.133333	0.0666667
75	2000-01-01	1899-12-31 12:00:00	93	#DIV/0!	#DIV/0!	0.08125	#DIV/0!	0.0666667	#DIV/0!	-0.0666667	#DIV/0!	#DIV/0!	#DIV/0!	1	1	1	1	1	1	1	1	1	1	#DIV/0!	0.233333	-0.154762	#DIV/0!	#DIV/0!	#DIV/0!	#DIV/0!	#DIV/0!	0.0714286	#DIV/0!	1	1	1	1	1	1	1	1	1	1	#DIV/0!	#DIV/0!	#DIV/0!	#DIV/0!	0.133333	0.0666667
[truncated: 154 more columns]

## Sheet: log rank data
deaths
log-rank test data												at risk											Expected values
day	UAS-InR RU +	UAS-InR RU -	W1118 RU +	W1118 RU -	UAS-InR DN BL RU +	UAS-InR DN BL RU -	UAS-InR DN RU +	UAS-InR DN RU -	UAS-InR active RU +	UAS-InR active RU -		UAS-InR RU +	UAS-InR RU -	W1118 RU +	W1118 RU -	UAS-InR DN BL RU +	UAS-InR DN BL RU -	UAS-InR DN RU +	UAS-InR DN RU -	UAS-InR active RU +	UAS-InR active RU -		UAS-InR RU +									UAS-InR RU -								W1118 RU +							W1118 RU -
sum	154	153	124	128	159	154	152	150	151	152													UAS-InR RU -	W1118 RU +	W1118 RU -	UAS-InR DN BL RU +	UAS-InR DN BL RU -	UAS-InR DN RU +	UAS-InR DN RU -	UAS-InR active RU +	UAS-InR active RU -	W1118 RU +	W1118 RU -	UAS-InR DN BL RU +	UAS-InR DN BL RU -	UAS-InR DN RU +	UAS-InR DN RU -	UAS-InR active RU +	UAS-InR active RU -	W1118 RU -	UAS-InR DN BL RU +	UAS-InR DN BL RU -	UAS-InR DN RU +	UAS-InR DN RU -	UAS-InR active RU +	UAS-InR active RU -	UAS-InR DN BL RU +	UAS-InR DN BL RU -	UAS-InR DN RU +
0	0	0	0	0	0	0	0	0	0	0		154	153	124	128	159	154	152	150	151	152		0	0	0	0	0	0	0	0	0	0	0	0	0	0	0	0	0	0	0	0	0	0	0	0	0	0	0
1	0	0	0	0	0	0	0	0	0	0		154	153	124	128	159	154	152	150	151	152		0	0	0	0	0	0	0	0	0	0	0	0	0	0	0	0	0	0	0	0	0	0	0	0	0	0	0
3	1	2	0	1	0	2	1	0	3	0		153	152	123	128	159	152	151	148	150	152		1.50492	0.554348	1.08897	0.490385	1.50492	1.00658	0.508306	2.0198	0.501639	1.10545	1.62857	0.977492	2	1.50495	1.01333	2.51656	1	0.49004	0	0.894545	0.448905	0	1.35165	0	0.445993	1.37143	0.917563
6	3	0	0	0	0	0	0	0	0	0		152	150	123	127	159	150	150	148	147	152		1.50993	1.65818	1.63441	1.46624	1.50993	1.50993	1.52	1.52508	1.5	0	0	0	0	0	0	0	0	0	0	0	0	0	0	0	0	0	0
8	0	0	1	0	7	0	7	0	0	0		149	150	123	127	159	150	150	148	147	152		0	0.547794	0	3.38636	0	3.48829	0	0	0	0.549451	0	3.39806	0	3.5	0	0	0	0.492	3.48936	0.450549	3.6044	0.453875	0.455556	0.447273	3.10839	0	3.20939
11	14	0	25	2	44	0	73	1	7	0		149	149	122	127	152	150	143	148	147	152		7	21.4428	8.63768	28.711	6.97659	44.3938	7.52525	10.5709	6.93023	13.7454	1.07971	21.7807	0	37.25	0.501684	3.52365	0	13.2289	30.7226	11.2132	45.117	11.7481	14.513	11.1314	20.9391	0.916968	35.2778
13	13	0	14	0	12	0	14	0	1	1		133	149	97	125	108	150	70	146	139	152		6.13121	15.613	6.70155	13.7967	6.10954	17.6897	6.19713	6.84559	6.53333	8.47967	0	6.9572	0	9.52511	0	0.517361	0.495017	6.11712	12.3024	5.49798	16.2635	5.58848	6.16525	5.84337	6.43777	0	8.97436
15	4	1	10	0	11	0	4	0	1	0		120	149	83	125	96	150	56	145	137	151		2.23048	8.27586	1.95918	8.33333	1.77778	5.45455	1.81132	2.33463	1.77122	7.06466	0.543796	7.29796	0.498328	3.63415	0.506803	1.04196	0.496667	3.99038	9.73743	3.56223	8.35971	3.64035	4.15	3.54701	6.22172	0	2.76243
17	7	0	13	0	6	0	9	0	1	1		114	148	72	125	85	150	51	145	135	151		3.0458	12.2581	3.33891	7.44724	3.02273	11.0545	3.08108	3.66265	3.44151	8.74545	0	3.81116	0	6.69347	0	0.522968	0.494983	4.75127	8.71338	4.21622	12.878	4.31336	4.86957	4.52018	3.57143	0	6.39205
20	25	1	31	0	19	0	16	1	32	0		105	148	57	125	79	150	42	144	133	150		10.7905	36.2963	11.413	25.1087	10.2941	29.2857	10.9639	25.1471	10.2941	23.1024	0.542125	13.0396	0.496644	13.2421	1.0137	17.3808	0.496644	9.70879	20.9559	8.53623	27.0606	9.07463	18.9	8.53623	11.6422	0	11.976
22	3	0	8	1	6	0	3	0	3	0		76	141	22	125	54	150	26	137	93	150		1.05069	8.53061	1.51244	5.26154	1.00885	4.47059	1.07042	2.69822	1.00885	6.92025	0.530075	4.33846	0	2.53293	0	1.80769	0	1.34694	4.05263	1.02326	5.04167	1.10692	2.10435	1.02326	4.88827	0.454545	3.31126
24	11	0	4	0	9	0	6	0	6	0		72	141	14	124	48	149	23	137	89	150		3.71831	12.5581	4.04082	12	3.58371	12.8842	3.78947	7.60248	3.56757	3.63871	0	6.71429	0	5.15854	0	3.67826	0	0.405797	2.93548	0.343558	3.78378	0.370861	1.35922	0.341463	6.48837	0	5.06122
27	25	0	4	1	19	1	7	0	29	0		61	141	10	124	39	149	17	137	83	150		7.5495	24.9155	8.57297	26.84	7.55238	25.0256	7.70202	22.875	7.22749	3.7351	0.532075	14.8833	0.486207	6.24684	0	18.2545	0	0.373134	4.69388	0.314465	4.07407	0.272109	3.54839	0.25	15.2147	0.908425	7.03546
29	5	0	0	0	1	1	2	0	3	0		36	141	6	123	19	148	10	137	54	150		1.01695	4.28571	1.13208	3.92727	1.17391	5.47826	1.04046	3.2	0.967742	0	0	0.88125	0.487889	1.86755	0	2.16923	0	0	0.24	0.038961	0.75	0	0.3	0	0.866197	0.453875	1.84962
31	1	0	0	0	3	0	1	0	7	0		31	141	6	123	18	147	8	137	51	150		0.180233	0.837838	0.201299	2.53061	0.174157	1.58974	0.184524	3.02439	0.171271	0	0	2.66038	0	0.946309	0	5.14062	0	0	0.75	0	0.428571	0	0.736842	0	2.61702	0	0.938931
34	3	0	3	0	1	0	1	0	13	0		30	141	6	123	15	147	7	137	44	150		0.526316	5	0.588235	2.66667	0.508475	3.24324	0.538922	6.48649	0.5	2.87755	0	0.903846	0	0.952703	0	9.90811	0	0.139535	1.14286	0.117647	1.84615	0.125874	1.92	0.115385	0.891304	0	0.946154
36	1	0	0	0	0	0	0	0	1	0		26	141	3	123	14	147	6	137	31	150		0.155689	0.896552	0.174497	0.65	0.150289	0.8125	0.159509	0.912281	0.147727	0	0	0	0	0	0	0.819767	0	0	0	0	0	0	0.0882353	0	0	0	0
38	0	0	1	2	1	1	0	0	2	0		25	141	3	123	14	147	6	137	30	150		0	0.892857	0.337838	0.641026	0.145349	0	0	0.909091	0	0.979167	1.06818	0.909677	0.489583	0	0	1.64912	0	0.0714286	0.352941	0.04	0.333333	0.0214286	0.272727	0.0196078	2.69343	1.36667	1.90698
41	2	0	1	3	1	0	1	1	6	0		25	140	2	121	13	146	6	137	28	150		0.30303	2.77778	0.856164	1.97368	0.292398	2.41935	0.462963	3.77358	0.285714	0.985915	1.6092	0.915033	0	0.958904	0.505415	5	0	0.0650407	0.266667	0.0135135	0.5	0.028777	0.466667	0.0131579	3.61194	1.35955	3.81102
43	0	0	0	0	1	0	0	0	3	0		23	140	1	118	12	145	5	136	22	150		0	0	0	0.657143	0	0	0	1.53333	0	0	0	0.921053	0	0	0	2.59259	0	0	0.0769231	0	0	0	0.130435	0	0.907692	0	0
45	1	0	1	0	5	0	0	1	0	0		23	140	1	117	11	145	5	136	19	150		0.141104	1.91667	0.164286	4.05882	0.136905	0.821429	0.289308	0.547619	0.132948	0.992908	0	4.63576	0	0	0.507246	0	0	0.00847458	0.5	0.00684932	0.166667	0.0145985	0.05	0.00662252	4.57031	0	0
48	4	0	0	5	0	2	0	0	8	0		22	140	0	117	6	145	5	135	19	150		0.54321	4	1.42446	3.14286	0.790419	3.25926	0.56051	6.43902	0.511628	0	2.72374	0	0.982456	0	0	7.04403	0	0	0	0	0	0	0	0	4.7561	3.12595	4.79508
50	1	0	0	2	1	3	0	1	0	0		18	138	0	112	6	142	5	134	11	147		0.115385	1	0.415385	1.5	0.45	0.782609	0.236842	0.62069	0.109091	0	1.104	0.958333	1.47857	0	0.507353	0	0	0	0	0	0	0	0	0	2.84746	2.20472	1.91453
52	0	0	0	3	0	1	1	1	0	1		17	138	0	110	5	139	5	133	11	147		0	0	0.401575	0	0.108974	0.772727	0.113333	0	0.103659	0	1.66935	0	0.498195	0.965035	0.509225	0	0.484211	0	0	0	0	0	0	0	2.86957	1.76707	3.82609
55	0	3	0	6	0	9	0	5	2	1		17	138	0	107	5	138	4	132	11	146		0.329032	0	0.822581	0	0.987097	0	0.57047	1.21429	0.104294	3	5.06939	2.8951	6	2.91549	4.08889	4.63087	1.94366	0	0	0	0	0	0	0	5.73214	6.55102	5.78378
57	0	0	0	0	0	0	0	1	1	0		17	135	0	101	5	128	4	127	9	145		0	0	0	0	0	0	0.118056	0.653846	0	0	0	0	0	0	0.515267	0.9375	0	0	0	0	0	0	0	0	0	0	0
59	0	2	0	3	0	1	0	1	0	1		17	135	0	101	5	128	4	126	8	145		0.223684	0	0.432203	0	0.117241	0	0.118881	0	0.104938	2	2.86017	1.92857	1.53992	1.94245	1.55172	1.88811	1.44643	0	0	0	0	0	0	0	2.85849	1.76419	2.88571
62	0	5	0	5	0	17	0	11	3	18		17	133	0	98	5	125	4	124	8	144		0.566667	0	0.73913	0	2.03521	0	1.32624	2.04	1.90062	5	5.75758	4.81884	11.3411	4.85401	8.28016	7.5461	11.0433	0	0	0	0	0	0	0	4.75728	9.66816	4.80392
64	0	5	0	4	0	12	1	7	1	3		17	128	0	93	5	107	4	113	5	124		0.586207	0	0.618182	0	1.64516	0.809524	0.915385	0.772727	0.361702	5	5.21267	4.81203	9.25957	5.81818	6.37344	5.77444	4.06349	0	0	0	0	0	0	0	3.79592	7.44	4.79381
66	0	3	0	6	0	5	0	8	0	3		17	123	0	89	5	95	3	106	4	121		0.364286	0	0.962264	0	0.758929	0	1.10569	0	0.369565	3	5.2217	2.88281	4.51376	2.92857	5.9083	2.90551	3.02459	0	0	0	0	0	0	0	5.68085	5.32065	5.80435
69	3	52	0	29	1	21	3	21	0	20		17	120	0	83	5	89	3	98	4	118		6.82482	3	5.44	3.09091	3.84906	5.1	3.54783	2.42857	2.8963	52	47.8818	50.88	41.9139	53.6585	40.1835	50.3226	36.3025	0	0	0	0	0	0	0	28.2955	24.1279	30.8837
71	0	3	0	9	1	3	0	6	1	14		14	68	0	54	4	68	0	77	4	95		0.512195	0	1.85294	0.777778	0.512195	0	0.923077	0.777778	1.79817	3	6.68852	3.77778	3	3	4.22069	3.77778	7.09202	0	0	0	0	0	0	0	9.31034	5.31148	9
73	1	6	0	5	2	15	0	9	0	11		14	65	0	44	3	65	0	71	3	81		1.24051	1	1.44828	2.47059	2.83544	1	1.64706	0.823529	1.76842	6	6.55963	7.64706	10.5	6	7.16912	5.73529	7.56849	0	0	0	0	0	0	0	6.55319	8.07339	5
76	4	24	0	14	1	24	0	21	1	31		13	58	0	39	1	50	0	62	3	70		5.12676	4	4.5	4.64286	5.77778	4	4.33333	4.0625	5.48193	24	22.7216	24.5763	25.7778	24	21.75	23.7705	24.9219	0	0	0	0	0	0	0	14.625	16.6517	14
78	0	1	0	0	0	6	0	6	0	5		9	34	0	25	0	26	0	41	2	39		0.209302	0	0	0	1.54286	0	1.08	0	0.9375	1	0.576271	1	3.96667	1	3.17333	0.944444	2.79452	0	0	0	0	0	0	0	0	2.94118	0
80	0	3	0	1	0	3	0	7	2	5		9	33	0	25	0	20	0	35	2	34		0.642857	0	0.264706	0	0.931034	0	1.43182	1.63636	1.04651	3	2.27586	3	3.73585	3	4.85294	4.71429	3.9403	0	0	0	0	0	0	0	1	2.22222	1
82	6	19	0	12	0	11	0	18	0	18		9	30	0	24	0	17	0	28	0	29		5.76923	6	4.90909	6	5.88462	6	5.83784	6	5.68421	19	17.2222	19	19.1489	19	19.1379	19	18.8136	0	0	0	0	0	0	0	12	13.4634	12
85	0	8	0	9	0	3	0	4	0	5		3	11	0	12	0	6	0	10	0	11		1.71429	0	1.8	0	1	0	0.923077	0	1.07143	8	8.13043	8	7.11765	8	6.28571	8	6.5	0	0	0	0	0	0	0	9	8	9
88	3	1	0	1	0	0	0	2	0	3		3	3	0	3	0	3	0	6	0	6		2	3	2	3	1.5	3	1.66667	3	2	1	1	1	0.5	1	1	1	1.33333	0	0	0	0	0	0	0	1	0.5	1
91	0	1	0	1	0	1	0	3	0	2		0	2	0	2	0	3	0	4	0	3		0	0	0	0	0	0	0	0	0	1	1	1	0.8	1	1.33333	1	1.2	0	0	0	0	0	0	0	1	0.8	1
93	0	0	0	1	0	2	0	0	0	0		0	1	0	1	0	2	0	1	0	1		0	0	0	0	0	0	0	0	0	0	0.5	0	0.666667	0	0	0	0	0	0	0	0	0	0	0	1	1	1
93	0	0	0	0	0	0	0	0	0	0		0	0	0	0	0	0	0	0	0	0		0	0	0	0	0	0	0	0	0	0	0	0	0	0	0	0	0	0	0	0	0	0	0	0	0	0	0
93	0	0	0	0	0	0	0	0	0	0		0	0	0	0	0	0	0	0	0	0		0	0	0	0	0	0	0	0	0	0	0	0	0	0	0	0	0	0	0	0	0	0	0	0	0	0	0
93	0	0	0	0	0	0	0	0	0	0		0	0	0	0	0	0	0	0	0	0		0	0	0	0	0	0	0	0	0	0	0	0	0	0	0	0	0	0	0	0	0	0	0	0	0	0	0
93	0	0	0	0	0	0	0	0	0	0		0	0	0	0	0	0	0	0	0	0		0	0	0	0	0	0	0	0	0	0	0	0	0	0	0	0	0	0	0	0	0	0	0	0	0	0	0
93	0	0	0	0	0	0	0	0	0	0		0	0	0	0	0	0	0	0	0	0		0	0	0	0	0	0	0	0	0	0	0	0	0	0	0	0	0	0	0	0	0	0	0	0	0	0	0
93	0	0	0	0	0	0	0	0	0	0		0	0	0	0	0	0	0	0	0	0		0	0	0	0	0	0	0	0	0	0	0	0	0	0	0	0	0	0	0	0	0	0	0	0	0	0	0
93	0	0	0	0	0	0	0	0	0	0		0	0	0	0	0	0	0	0	0	0		0	0	0	0	0	0	0	0	0	0	0	0	0	0	0	0	0	0	0	0	0	0	0	0	0	0	0
93	0	0	0	0	0	0	0	0	0	0		0	0	0	0	0	0	0	0	0	0		0	0	0	0	0	0	0	0	0	0	0	0	0	0	0	0	0	0	0	0	0	0	0	0	0	0	0
93	0	0	0	0	0	0	0	0	0	0		0	0	0	0	0	0	0	0	0	0		0	0	0	0	0	0	0	0	0	0	0	0	0	0	0	0	0	0	0	0	0	0	0	0	0	0	0
93	0	0	0	0	0	0	0	0	0	0		0	0	0	0	0	0	0	0	0	0		0	0	0	0	0	0	0	0	0	0	0	0	0	0	0	0	0	0	0	0	0	0	0	0	0	0	0
93	0	0	0	0	0	0	0	0	0	0		0	0	0	0	0	0	0	0	0	0		0	0	0	0	0	0	0	0	0	0	0	0	0	0	0	0	0	0	0	0	0	0	0	0	0	0	0
93	0	0	0	0	0	0	0	0	0	0		0	0	0	0	0	0	0	0	0	0		0	0	0	0	0	0	0	0	0	0	0	0	0	0	0	0	0	0	0	0	0	0	0	0	0	0	0
93	0	0	0	0	0	0	0	0	0	0		0	0	0	0	0	0	0	0	0	0		0	0	0	0	0	0	0	0	0	0	0	0	0	0	0	0	0	0	0	0	0	0	0	0	0	0	0
93	0	0	0	0	0	0	0	0	0	0		0	0	0	0	0	0	0	0	0	0		0	0	0	0	0	0	0	0	0	0	0	0	0	0	0	0	0	0	0	0	0	0	0	0	0	0	0
93	0	0	0	0	0	0	0	0	0	0		0	0	0	0	0	0	0	0	0	0		0	0	0	0	0	0	0	0	0	0	0	0	0	0	0	0	0	0	0	0	0	0	0	0	0	0	0
93	0	0	0	0	0	0	0	0	0	0		0	0	0	0	0	0	0	0	0	0		0	0	0	0	0	0	0	0	0	0	0	0	0	0	0	0	0	0	0	0	0	0	0	0	0	0	0
93	0	0	0	0	0	0	0	0	0	0		0	0	0	0	0	0	0	0	0	0		0	0	0	0	0	0	0	0	0	0	0	0	0	0	0	0	0	0	0	0	0	0	0	0	0	0	0
93	0	0	0	0	0	0	0	0	0	0		0	0	0	0	0	0	0	0	0	0		0	0	0	0	0	0	0	0	0	0	0	0	0	0	0	0	0	0	0	0	0	0	0	0	0	0	0
93	0	0	0	0	0	0	0	0	0	0		0	0	0	0	0	0	0	0	0	0		0	0	0	0	0	0	0	0	0	0	0	0	0	0	0	0	0	0	0	0	0	0	0	0	0	0	0
93	0	0	0	0	0	0	0	0	0	0		0	0	0	0	0	0	0	0	0	0		0	0	0	0	0	0	0	0	0	0	0	0	0	0	0	0	0	0	0	0	0	0	0	0	0	0	0
93	0	0	0	0	0	0	0	0	0	0		0	0	0	0	0	0	0	0	0	0		0	0	0	0	0	0	0	0	0	0	0	0	0	0	0	0	0	0	0	0	0	0	0	0	0	0	0
93	0	0	0	0	0	0	0	0	0	0		0	0	0	0	0	0	0	0	0	0		0	0	0	0	0	0	0	0	0	0	0	0	0	0	0	0	0	0	0	0	0	0	0	0	0	0	0
93	0	0	0	0	0	0	0	0	0	0		0	0	0	0	0	0	0	0	0	0		0	0	0	0	0	0	0	0	0	0	0	0	0	0	0	0	0	0	0	0	0	0	0	0	0	0	0
93	0	0	0	0	0	0	0	0	0	0		0	0	0	0	0	0	0	0	0	0		0	0	0	0	0	0	0	0	0	0	0	0	0	0	0	0	0	0	0	0	0	0	0	0	0	0	0
93	0	0	0	0	0	0	0	0	0	0		0	0	0	0	0	0	0	0	0	0		0	0	0	0	0	0	0	0	0	0	0	0	0	0	0	0	0	0	0	0	0	0	0	0	0	0	0
93	0	0	0	0	0	0	0	0	0	0		0	0	0	0	0	0	0	0	0	0		0	0	0	0	0	0	0	0	0	0	0	0	0	0	0	0	0	0	0	0	0	0	0	0	0	0	0
93	0	0	0	0	0	0	0	0	0	0		0	0	0	0	0	0	0	0	0	0		0	0	0	0	0	0	0	0	0	0	0	0	0	0	0	0	0	0	0	0	0	0	0	0	0	0	0
93	0	0	0	0	0	0	0	0	0	0		0	0	0	0	0	0	0	0	0	0		0	0	0	0	0	0	0	0	0	0	0	0	0	0	0	0	0	0	0	0	0	0	0	0	0	0	0
93	0	0	0	0	0	0	0	0	0	0		0	0	0	0	0	0	0	0	0	0		0	0	0	0	0	0	0	0	0	0	0	0	0	0	0	0	0	0	0	0	0	0	0	0	0	0	0
93	0	0	0	0	0	0	0	0	0	0		0	0	0	0	0	0	0	0	0	0		0	0	0	0	0	0	0	0	0	0	0	0	0	0	0	0	0	0	0	0	0	0	0	0	0	0	0
93	0	0	0	0	0	0	0	0	0	0		0	0	0	0	0	0	0	0	0	0		0	0	0	0	0	0	0	0	0	0	0	0	0	0	0	0	0	0	0	0	0	0	0	0	0	0	0
93	0	0	0	0	0	0	0	0	0	0		0	0	0	0	0	0	0	0	0	0		0	0	0	0	0	0	0	0	0	0	0	0	0	0	0	0	0	0	0	0	0	0	0	0	0	0	0
93	0	0	0	0	0	0	0	0	0	0		0	0	0	0	0	0	0	0	0	0		0	0	0	0	0	0	0	0	0	0	0	0	0	0	0	0	0	0	0	0	0	0	0	0	0	0	0
93	0	0	0	0	0	0	0	0	0	0		0	0	0	0	0	0	0	0	0	0		0	0	0	0	0	0	0	0	0	0	0	0	0	0	0	0	0	0	0	0	0	0	0	0	0	0	0
93	0	0	0	0	0	0	0	0	0	0		0	0	0	0	0	0	0	0	0	0		0	0	0	0	0	0	0	0	0	0	0	0	0	0	0	0	0	0	0	0	0	0	0	0	0	0	0
sum	141	140	116	126	152	144	150	136	137	143													73.6231	181.258	80.3852	174.572	76.648	195.352	73.3007	136.138	71.2313	218.922	151.709	233.202	157.2	233.096	140.889	225.515	135.456	41.1889	100.932	36.2692	130.656	36.7594	61.3819	35.7949	212.198	127.765	212.861
censors
day	UAS-InR RU +	UAS-InR RU -	W1118 RU +	W1118 RU -	UAS-InR DN BL RU +	UAS-InR DN BL RU -	UAS-InR DN RU +	UAS-InR DN RU -	UAS-InR active RU +	UAS-InR active RU -
0	0	0	0	0	0	0	0	0	0	0
1	1	1	1	0	0	2	1	2	1	0
3	0	0	0	0	0	0	0	0	0	0
6	0	0	0	0	0	0	0	0	0	0
8	0	1	0	0	0	0	0	0	0	0
11	2	0	0	0	0	0	0	1	1	0
13	0	0	0	0	0	0	0	1	1	0
15	2	0	1	0	0	0	1	0	1	0
17	2	0	2	0	0	0	0	1	1	0
20	4	6	4	0	6	0	0	6	8	0
22	1	0	0	0	0	1	0	0	1	0
24	0	0	0	0	0	0	0	0	0	0
27	0	0	0	0	1	0	0	0	0	0
29	0	0	0	0	0	0	0	0	0	0
31	0	0	0	0	0	0	0	0	0	0
34	1	0	0	0	0	0	0	0	0	0
36	0	0	0	0	0	0	0	0	0	0
38	0	1	0	0	0	0	0	0	0	0
41	0	0	0	0	0	1	0	0	0	0
43	0	0	0	1	0	0	0	0	0	0
45	0	0	0	0	0	0	0	0	0	0
48	0	2	0	0	0	1	0	1	0	3
50	0	0	0	0	0	0	0	0	0	0
52	0	0	0	0	0	0	0	0	0	0
55	0	0	0	0	0	1	0	0	0	0
57	0	0	0	0	0	0	0	0	0	0
59	0	0	0	0	0	2	0	1	0	0
62	0	0	0	0	0	1	0	0	0	2
64	0	0	0	0	0	0	0	0	0	0
66	0	0	0	0	0	1	0	0	0	0
69	0	0	0	0	0	0	0	0	0	3
71	0	0	0	1	0	0	0	0	0	0
73	0	1	0	0	0	0	0	0	0	0
76	0	0	0	0	0	0	0	0	0	0
78	0	0	0	0	0	0	0	0	0	0
80	0	0	0	0	0	0	0	0	0	0
82	0	0	0	0	0	0	0	0	0	0
85	0	0	0	0	0	0	0	0	0	0
88	0	0	0	0	0	0	0	0	0	0
91	0	0	0	0	0	0	0	0	0	0
93	0	1	0	0	0	0	0	1	0	1
93	0	0	0	0	0	0	0	0	0	0
93	0	0	0	0	0	0	0	0	0	0
93	0	0	0	0	0	0	0	0	0	0
93	0	0	0	0	0	0	0	0	0	0
93	0	0	0	0	0	0	0	0	0	0
93	0	0	0	0	0	0	0	0	0	0
93	0	0	0	0	0	0	0	0	0	0
93	0	0	0	0	0	0	0	0	0	0
93	0	0	0	0	0	0	0	0	0	0
93	0	0	0	0	0	0	0	0	0	0
93	0	0	0	0	0	0	0	0	0	0
93	0	0	0	0	0	0	0	0	0	0
93	0	0	0	0	0	0	0	0	0	0
93	0	0	0	0	0	0	0	0	0	0
93	0	0	0	0	0	0	0	0	0	0
93	0	0	0	0	0	0	0	0	0	0
93	0	0	0	0	0	0	0	0	0	0
93	0	0	0	0	0	0	0	0	0	0
93	0	0	0	0	0	0	0	0	0	0
93	0	0	0	0	0	0	0	0	0	0
93	0	0	0	0	0	0	0	0	0	0
93	0	0	0	0	0	0	0	0	0	0
93	0	0	0	0	0	0	0	0	0	0
93	0	0	0	0	0	0	0	0	0	0
93	0	0	0	0	0	0	0	0	0	0
93	0	0	0	0	0	0	0	0	0	0
93	0	0	0	0	0	0	0	0	0	0
93	0	0	0	0	0	0	0	0	0	0
93	0	0	0	0	0	0	0	0	0	0
93	0	0	0	0	0	0	0	0	0	0
93	0	0	0	0	0	0	0	0	0	0
93	0	0	0	0	0	0	0	0	0	0
93	0	0	0	0	0	0	0	0	0	0
93	0	0	0	0	0	0	0	0	0	0
93	0	0	0	0	0	0	0	0	0	0
[truncated: 63 more columns]

## Sheet: mort data
					deaths
																Nx	number of survivors											proportion of survivors												Ux	negative log of proportion of daily survivors
	count			day	UAS-InR RU +	UAS-InR RU -	W1118 RU +	W1118 RU -	UAS-InR DN BL RU +	UAS-InR DN BL RU -	UAS-InR DN RU +	UAS-InR DN RU -	UAS-InR active RU +	UAS-InR active RU -		day	UAS-InR RU +	UAS-InR RU -	W1118 RU +	W1118 RU -	UAS-InR DN BL RU +	UAS-InR DN BL RU -	UAS-InR DN RU +	UAS-InR DN RU -	UAS-InR active RU +	UAS-InR active RU -		day	UAS-InR RU +	UAS-InR RU -	W1118 RU +	W1118 RU -	UAS-InR DN BL RU +	UAS-InR DN BL RU -	UAS-InR DN RU +	UAS-InR DN RU -	UAS-InR active RU +	UAS-InR active RU -		day	UAS-InR RU +	UAS-InR RU -	W1118 RU +	W1118 RU -	UAS-InR DN BL RU +	UAS-InR DN BL RU -	UAS-InR DN RU +	UAS-InR DN RU -	UAS-InR active RU +
	date	time														est 0	154	153	124	128	159	154	152	150	151	152
0	2017-10-03	1899-12-31 12:00:00		0													154	153	124	128	159	154	152	150	151	152		0	1	1	1	1	1	1	1	1	1	1		0	0	0	0	0	0	0	0	0	0
1	2017-10-04	1899-12-31 12:00:00		1	0	0	0	0	0	0	0	0	0	0		1	153	152	123	128	159	152	151	148	150	152		1	1	1	1	1	1	1	1	1	1	1		1	0	0	0	0	0	0	0	0	0
2	2017-10-06	1899-12-31 12:00:00		3	1	2	0	1	0	2	1	0	3	0		3	152	150	123	127	159	150	150	148	147	152		3	0.993464	0.986842	1	0.992188	1	0.986842	0.993377	1	0.98	1		3	0.0065574	0.0132452	0	0.00784318	0	0.0132452	0.00664454	0	0.0202027
3	2017-10-09	1899-12-31 12:00:00		6	3	0	0	0	0	0	0	0	0	0		6	149	150	123	127	159	150	150	148	147	152		6	0.973856	0.986842	1	0.992188	1	0.986842	0.993377	1	0.98	1		6	0.0199342	0	0	0	0	0	0	0	0
4	2017-10-11	1899-12-31 12:00:00		8	0	0	1	0	7	0	7	0	0	0		8	149	149	122	127	152	150	143	148	147	152		8	0.973856	0.986842	0.99187	0.992188	0.955975	0.986842	0.94702	1	0.98	1		8	0	0	0.00816331	0	0.0450237	0	0.0477907	0	0
5	2017-10-14	1899-12-31 12:00:00		11	14	0	25	2	44	0	73	1	7	0		11	133	149	97	125	108	150	70	146	139	152		11	0.882353	0.986842	0.788618	0.976562	0.679245	0.986842	0.463576	0.993243	0.933333	1		11	0.0986715	0	0.22931	0.0158733	0.341749	0	0.714349	0.00677969	0.0487902
6	2017-10-16	1899-12-31 12:00:00		13	13	0	14	0	12	0	14	0	1	1		13	120	149	83	125	96	150	56	145	137	151		13	0.796108	0.986842	0.674797	0.976562	0.603774	0.986842	0.370861	0.993243	0.926619	0.993421		13	0.102857	0	0.15587	0	0.117783	0	0.223144	0	0.00722025
7	2017-10-18	1899-12-31 12:00:00		15	4	1	10	0	11	0	4	0	1	0		15	114	148	72	125	85	150	51	145	135	151		15	0.769571	0.980219	0.593496	0.976562	0.534591	0.986842	0.344371	0.993243	0.919855	0.993421		15	0.0339016	0.00673403	0.128381	0	0.121697	0	0.074108	0	0.00732604
8	2017-10-20	1899-12-31 12:00:00		17	7	0	13	0	6	0	9	0	1	1		17	105	148	57	125	79	150	42	144	133	150		17	0.722317	0.980219	0.486337	0.976562	0.496855	0.986842	0.2836	0.993243	0.913041	0.986842		17	0.0633696	0	0.199129	0	0.0732034	0	0.194156	0	0.00743498
9	2017-10-23	1899-12-31 12:00:00		20	25	1	31	0	19	0	16	1	32	0		20	76	141	22	125	54	150	26	137	93	150		20	0.550336	0.973596	0.221838	0.976562	0.377358	0.986842	0.175562	0.986346	0.693362	0.986842		20	0.271934	0.00677969	0.784955	0	0.275103	0	0.479573	0.00696867	0.275229
10	2017-10-25	1899-12-31 12:00:00		22	3	0	8	1	6	0	3	0	3	0		22	72	141	14	124	48	149	23	137	89	150		22	0.528613	0.973596	0.14117	0.96875	0.33543	0.986842	0.155305	0.986346	0.670996	0.986842		22	0.0402739	0	0.451985	0.00803217	0.117783	0	0.122602	0	0.0327898
11	2017-10-27	1899-12-31 12:00:00		24	11	0	4	0	9	0	6	0	6	0		24	61	141	10	124	39	149	17	137	83	150		24	0.447852	0.973596	0.100835	0.96875	0.272537	0.986842	0.11479	0.986346	0.62576	0.986842		24	0.165792	0	0.336472	0	0.207639	0	0.302281	0	0.0697958
12	2017-10-30	1899-12-31 12:00:00		27	25	0	4	1	19	1	7	0	29	0		27	36	141	6	123	19	148	10	137	54	150		27	0.264306	0.973596	0.0605012	0.960938	0.139762	0.980219	0.0675237	0.986346	0.407121	0.986842		27	0.527355	0	0.510826	0.00809721	0.667829	0.00673403	0.530628	0	0.429857
13	2017-11-01	1899-12-31 12:00:00		29	5	0	0	0	1	1	2	0	3	0		29	31	141	6	123	18	147	8	137	51	150		29	0.227597	0.973596	0.0605012	0.960938	0.132406	0.973596	0.054019	0.986346	0.384503	0.986842		29	0.149532	0	0	0	0.0540672	0.00677969	0.223144	0	0.0571584
14	2017-11-03	1899-12-31 12:00:00		31	1	0	0	0	3	0	1	0	7	0		31	30	141	6	123	15	147	7	137	44	150		31	0.220255	0.973596	0.0605012	0.960938	0.110339	0.973596	0.0472666	0.986346	0.331728	0.986842		31	0.0327898	0	0	0	0.182322	0	0.133531	0	0.147636
15	2017-11-06	1899-12-31 12:00:00		34	3	0	3	0	1	0	1	0	13	0		34	26	141	3	123	14	147	6	137	31	150		34	0.19823	0.973596	0.0302506	0.960938	0.102983	0.973596	0.0405142	0.986346	0.233718	0.986842		34	0.105361	0	0.693147	0	0.0689929	0	0.154151	0	0.350202
16	2017-11-08	1899-12-31 12:00:00		36	1	0	0	0	0	0	0	0	1	0		36	25	141	3	123	14	147	6	137	30	150		36	0.190606	0.973596	0.0302506	0.960938	0.102983	0.973596	0.0405142	0.986346	0.226178	0.986842		36	0.0392207	0	0	0	0	0	0	0	0.0327898
17	2017-11-10	1899-12-31 12:00:00		38	0	0	1	2	1	1	0	0	2	0		38	25	140	2	121	13	146	6	137	28	150		38	0.190606	0.973596	0.0201671	0.945312	0.0956269	0.966973	0.0405142	0.986346	0.2111	0.986842		38	0	0	0.405465	0.0163938	0.074108	0.00682597	0	0	0.0689929
18	2017-11-13	1899-12-31 12:00:00		41	2	0	1	3	1	0	1	1	6	0		41	23	140	1	118	12	145	5	136	22	150		41	0.175357	0.973596	0.0100835	0.921875	0.088271	0.966973	0.0337618	0.979146	0.165864	0.986842		41	0.0833816	0	0.693147	0.0251059	0.0800427	0	0.182322	0.00732604	0.241162
19	2017-11-15	1899-12-31 12:00:00		43	0	0	0	0	1	0	0	0	3	0		43	23	140	1	117	11	145	5	136	19	150		43	0.175357	0.973596	0.0100835	0.921875	0.0809151	0.966973	0.0337618	0.979146	0.143246	0.986842		43	0	0	0	0	0.0870114	0	0	0	0.146603
20	2017-11-17	1899-12-31 12:00:00		45	1	0	1	0	5	0	0	1	0	0		45	22	140	0	117	6	145	5	135	19	150		45	0.167733	0.973596	0	0.921875	0.0441355	0.966973	0.0337618	0.971947	0.143246	0.986842		45	0.0444518	0	#NUM!	0	0.606136	0	0	0.00738011	0
21	2017-11-20	1899-12-31 12:00:00		48	4	0	0	5	0	2	0	0	8	0		48	18	138	0	112	6	142	5	134	11	147		48	0.137236	0.973596	#DIV/0!	0.882479	0.0441355	0.953635	0.0337618	0.971947	0.0829321	0.986842		48	0.200671	0	#DIV/0!	0.0436751	0	0.0138891	0	0	0.546544
22	2017-11-22	1899-12-31 12:00:00		50	1	0	0	2	1	3	0	1	0	0		50	17	138	0	110	5	139	5	133	11	147		50	0.129612	0.973596	#DIV/0!	0.86672	0.0367796	0.933488	0.0337618	0.964693	0.0829321	0.986842		50	0.0571584	0	#DIV/0!	0.0180185	0.182322	0.0213531	0	0.00749067	0
23	2017-11-24	1899-12-31 12:00:00		52	0	0	0	3	0	1	1	1	0	1		52	17	138	0	107	5	138	4	132	11	146		52	0.129612	0.973596	#DIV/0!	0.843082	0.0367796	0.926772	0.0270095	0.95744	0.0829321	0.980129		52	0	0	#DIV/0!	0.0276515	0	0.00722025	0.223144	0.00754721	0
24	2017-11-27	1899-12-31 12:00:00		55	0	3	0	6	0	9	0	5	2	1		55	17	135	0	101	5	128	4	127	9	145		55	0.129612	0.952431	#DIV/0!	0.795807	0.0367796	0.866331	0.0270095	0.921173	0.0678535	0.973416		55	0	0.0219789	#DIV/0!	0.0577083	0	0.0674413	0	0.0386148	0.200671
25	2017-11-29	1899-12-31 12:00:00		57	0	0	0	0	0	0	0	1	1	0		57	17	135	0	101	5	128	4	126	8	145		57	0.129612	0.952431	#DIV/0!	0.795807	0.0367796	0.866331	0.0270095	0.91392	0.0603142	0.973416		57	0	0	#DIV/0!	0	0	0	0	0.00790518	0.117783
26	2017-12-01	1899-12-31 12:00:00		59	0	2	0	3	0	1	0	1	0	1		59	17	133	0	98	5	125	4	124	8	144		59	0.129612	0.938321	#DIV/0!	0.772169	0.0367796	0.859562	0.0270095	0.906667	0.0603142	0.966702		59	0	0.0149257	#DIV/0!	0.030153	0	0.00784318	0	0.00796817	0
27	2017-12-04	1899-12-31 12:00:00		62	0	5	0	5	0	17	0	11	3	18		62	17	128	0	93	5	107	4	113	5	124		62	0.129612	0.903045	#DIV/0!	0.732772	0.0367796	0.742662	0.0270095	0.826236	0.0376964	0.845865		62	0	0.0383189	#DIV/0!	0.052368	0	0.146183	0	0.0928937	0.470004
28	2017-12-06	1899-12-31 12:00:00		64	0	5	0	4	0	12	1	7	1	3		64	17	123	0	89	5	95	3	106	4	121		64	0.129612	0.86777	#DIV/0!	0.701255	0.0367796	0.659373	0.0202571	0.775054	0.0301571	0.8254		64	0	0.0398459	#DIV/0!	0.0439631	0	0.118952	0.287682	0.0639487	0.223144
29	2017-12-08	1899-12-31 12:00:00		66	0	3	0	6	0	5	0	8	0	3		66	17	120	0	83	5	89	3	98	4	118		66	0.129612	0.846605	#DIV/0!	0.65398	0.0367796	0.624669	0.0202571	0.716559	0.0301571	0.804936		66	0	0.0246926	#DIV/0!	0.0697958	0	0.0540672	0	0.0784716	0
30	2017-12-11	1899-12-31 12:00:00		69	3	52	0	29	1	21	3	21	0	20		69	14	68	0	54	4	68	0	77	4	95		69	0.106739	0.479743	#DIV/0!	0.425481	0.0294237	0.477275	0	0.563011	0.0301571	0.668506		69	0.194156	0.567984	#DIV/0!	0.429857	0.223144	0.269129	#NUM!	0.241162	0
31	2017-12-13	1899-12-31 12:00:00		71	0	3	0	9	1	3	0	6	1	14		71	14	65	0	44	3	65	0	71	3	81		71	0.106739	0.458578	#DIV/0!	0.354567	0.0220677	0.456219	#DIV/0!	0.51914	0.0226178	0.569989		71	0	0.0451204	#DIV/0!	0.182322	0.287682	0.0451204	#DIV/0!	0.0811255	0.287682
32	2017-12-15	1899-12-31 12:00:00		73	1	6	0	5	2	15	0	9	0	11		73	13	58	0	39	1	50	0	62	3	70		73	0.0991149	0.416248	#DIV/0!	0.314276	0.00735592	0.350938	#DIV/0!	0.453333	0.0226178	0.492583		73	0.074108	0.0968498	#DIV/0!	0.120628	1.09861	0.262364	#DIV/0!	0.135545	0
33	2017-12-18	1899-12-31 12:00:00		76	4	24	0	14	1	24	0	21	1	31		76	9	34	0	25	0	26	0	41	2	39		76	0.068618	0.244007	#DIV/0!	0.201459	0	0.182488	#DIV/0!	0.299785	0.0150786	0.274439		76	0.367725	0.534082	#DIV/0!	0.444686	#NUM!	0.653926	#DIV/0!	0.413562	0.405465
34	2017-12-20	1899-12-31 12:00:00		78	0	1	0	0	0	6	0	6	0	5		78	9	33	0	25	0	20	0	35	2	34		78	0.068618	0.23683	#DIV/0!	0.201459	#DIV/0!	0.140375	#DIV/0!	0.255914	0.0150786	0.239255		78	0	0.029853	#DIV/0!	0	#DIV/0!	0.262364	#DIV/0!	0.158224	0
35	2017-12-22	1899-12-31 12:00:00		80	0	3	0	1	0	3	0	7	2	5		80	9	30	0	24	0	17	0	28	0	29		80	0.068618	0.2153	#DIV/0!	0.1934	#DIV/0!	0.119319	#DIV/0!	0.204731	0	0.20407		80	0	0.0953102	#DIV/0!	0.040822	#DIV/0!	0.162519	#DIV/0!	0.223144	#NUM!
36	2017-12-24	1899-12-31 12:00:00		82	6	19	0	12	0	11	0	18	0	18		82	3	11	0	12	0	6	0	10	0	11		82	0.0228727	0.0789435	#DIV/0!	0.0967002	#DIV/0!	0.0421125	#DIV/0!	0.0731183	#DIV/0!	0.077406		82	1.09861	1.0033	#DIV/0!	0.693147	#DIV/0!	1.04145	#DIV/0!	1.02962	#DIV/0!
37	2017-12-27	1899-12-31 12:00:00		85	0	8	0	9	0	3	0	4	0	5		85	3	3	0	3	0	3	0	6	0	6		85	0.0228727	0.02153	#DIV/0!	0.024175	#DIV/0!	0.0210563	#DIV/0!	0.043871	#DIV/0!	0.0422214		85	0	1.29928	#DIV/0!	1.38629	#DIV/0!	0.693147	#DIV/0!	0.510826	#DIV/0!
38	2017-12-30	1899-12-31 12:00:00		88	3	1	0	1	0	0	0	2	0	3		88	0	2	0	2	0	3	0	4	0	3		88	0	0.0143534	#DIV/0!	0.0161167	#DIV/0!	0.0210563	#DIV/0!	0.0292473	#DIV/0!	0.0211107		88	#NUM!	0.405465	#DIV/0!	0.405465	#DIV/0!	0	#DIV/0!	0.405465	#DIV/0!
39	2018-01-02	1899-12-31 12:00:00		91	0	1	0	1	0	1	0	3	0	2		91	0	1	0	1	0	2	0	1	0	1		91	#DIV/0!	0.00717668	#DIV/0!	0.00805835	#DIV/0!	0.0140375	#DIV/0!	0.00731183	#DIV/0!	0.0070369		91	#DIV/0!	0.693147	#DIV/0!	0.693147	#DIV/0!	0.405465	#DIV/0!	1.38629	#DIV/0!
40	2018-01-04	1899-12-31 12:00:00		93	0	0	0	1	0	2	0	0	0	0		93	0	0	0	0	0	0	0	0	0	0		93	#DIV/0!	0.00717668	#DIV/0!	0	#DIV/0!	0	#DIV/0!	0.00731183	#DIV/0!	0.0070369		93	#DIV/0!	0	#DIV/0!	#NUM!	#DIV/0!	#NUM!	#DIV/0!	0	#DIV/0!
41	2000-01-01	1899-12-31 12:00:00		93	0	0	0	0	0	0	0	0	0	0		93	0	0	0	0	0	0	0	0	0	0		93	#DIV/0!	#DIV/0!	#DIV/0!	#DIV/0!	#DIV/0!	#DIV/0!	#DIV/0!	#DIV/0!	#DIV/0!	#DIV/0!		93	#DIV/0!	#DIV/0!	#DIV/0!	#DIV/0!	#DIV/0!	#DIV/0!	#DIV/0!	#DIV/0!	#DIV/0!
42	2000-01-01	1899-12-31 12:00:00		93	0	0	0	0	0	0	0	0	0	0		93	0	0	0	0	0	0	0	0	0	0		93	#DIV/0!	#DIV/0!	#DIV/0!	#DIV/0!	#DIV/0!	#DIV/0!	#DIV/0!	#DIV/0!	#DIV/0!	#DIV/0!		93	#DIV/0!	#DIV/0!	#DIV/0!	#DIV/0!	#DIV/0!	#DIV/0!	#DIV/0!	#DIV/0!	#DIV/0!
43	2000-01-01	1899-12-31 12:00:00		93	0	0	0	0	0	0	0	0	0	0		93	0	0	0	0	0	0	0	0	0	0		93	#DIV/0!	#DIV/0!	#DIV/0!	#DIV/0!	#DIV/0!	#DIV/0!	#DIV/0!	#DIV/0!	#DIV/0!	#DIV/0!		93	#DIV/0!	#DIV/0!	#DIV/0!	#DIV/0!	#DIV/0!	#DIV/0!	#DIV/0!	#DIV/0!	#DIV/0!
44	2000-01-01	1899-12-31 12:00:00		93	0	0	0	0	0	0	0	0	0	0		93	0	0	0	0	0	0	0	0	0	0		93	#DIV/0!	#DIV/0!	#DIV/0!	#DIV/0!	#DIV/0!	#DIV/0!	#DIV/0!	#DIV/0!	#DIV/0!	#DIV/0!		93	#DIV/0!	#DIV/0!	#DIV/0!	#DIV/0!	#DIV/0!	#DIV/0!	#DIV/0!	#DIV/0!	#DIV/0!
45	2000-01-01	1899-12-31 12:00:00		93	0	0	0	0	0	0	0	0	0	0		93	0	0	0	0	0	0	0	0	0	0		93	#DIV/0!	#DIV/0!	#DIV/0!	#DIV/0!	#DIV/0!	#DIV/0!	#DIV/0!	#DIV/0!	#DIV/0!	#DIV/0!		93	#DIV/0!	#DIV/0!	#DIV/0!	#DIV/0!	#DIV/0!	#DIV/0!	#DIV/0!	#DIV/0!	#DIV/0!
46	2000-01-01	1899-12-31 12:00:00		93	0	0	0	0	0	0	0	0	0	0		93	0	0	0	0	0	0	0	0	0	0		93	#DIV/0!	#DIV/0!	#DIV/0!	#DIV/0!	#DIV/0!	#DIV/0!	#DIV/0!	#DIV/0!	#DIV/0!	#DIV/0!		93	#DIV/0!	#DIV/0!	#DIV/0!	#DIV/0!	#DIV/0!	#DIV/0!	#DIV/0!	#DIV/0!	#DIV/0!
47	2000-01-01	1899-12-31 12:00:00		93	0	0	0	0	0	0	0	0	0	0		93	0	0	0	0	0	0	0	0	0	0		93	#DIV/0!	#DIV/0!	#DIV/0!	#DIV/0!	#DIV/0!	#DIV/0!	#DIV/0!	#DIV/0!	#DIV/0!	#DIV/0!		93	#DIV/0!	#DIV/0!	#DIV/0!	#DIV/0!	#DIV/0!	#DIV/0!	#DIV/0!	#DIV/0!	#DIV/0!
48	2000-01-01	1899-12-31 12:00:00		93	0	0	0	0	0	0	0	0	0	0		93	0	0	0	0	0	0	0	0	0	0		93	#DIV/0!	#DIV/0!	#DIV/0!	#DIV/0!	#DIV/0!	#DIV/0!	#DIV/0!	#DIV/0!	#DIV/0!	#DIV/0!		93	#DIV/0!	#DIV/0!	#DIV/0!	#DIV/0!	#DIV/0!	#DIV/0!	#DIV/0!	#DIV/0!	#DIV/0!
49	2000-01-01	1899-12-31 12:00:00		93	0	0	0	0	0	0	0	0	0	0		93	0	0	0	0	0	0	0	0	0	0		93	#DIV/0!	#DIV/0!	#DIV/0!	#DIV/0!	#DIV/0!	#DIV/0!	#DIV/0!	#DIV/0!	#DIV/0!	#DIV/0!		93	#DIV/0!	#DIV/0!	#DIV/0!	#DIV/0!	#DIV/0!	#DIV/0!	#DIV/0!	#DIV/0!	#DIV/0!
50	2000-01-01	1899-12-31 12:00:00		93	0	0	0	0	0	0	0	0	0	0		93	0	0	0	0	0	0	0	0	0	0		93	#DIV/0!	#DIV/0!	#DIV/0!	#DIV/0!	#DIV/0!	#DIV/0!	#DIV/0!	#DIV/0!	#DIV/0!	#DIV/0!		93	#DIV/0!	#DIV/0!	#DIV/0!	#DIV/0!	#DIV/0!	#DIV/0!	#DIV/0!	#DIV/0!	#DIV/0!
51	2000-01-01	1899-12-31 12:00:00		93	0	0	0	0	0	0	0	0	0	0		93	0	0	0	0	0	0	0	0	0	0		93	#DIV/0!	#DIV/0!	#DIV/0!	#DIV/0!	#DIV/0!	#DIV/0!	#DIV/0!	#DIV/0!	#DIV/0!	#DIV/0!		93	#DIV/0!	#DIV/0!	#DIV/0!	#DIV/0!	#DIV/0!	#DIV/0!	#DIV/0!	#DIV/0!	#DIV/0!
52	2000-01-01	1899-12-31 12:00:00		93	0	0	0	0	0	0	0	0	0	0		93	0	0	0	0	0	0	0	0	0	0		93	#DIV/0!	#DIV/0!	#DIV/0!	#DIV/0!	#DIV/0!	#DIV/0!	#DIV/0!	#DIV/0!	#DIV/0!	#DIV/0!		93	#DIV/0!	#DIV/0!	#DIV/0!	#DIV/0!	#DIV/0!	#DIV/0!	#DIV/0!	#DIV/0!	#DIV/0!
53	2000-01-01	1899-12-31 12:00:00		93	0	0	0	0	0	0	0	0	0	0		93	0	0	0	0	0	0	0	0	0	0		93	#DIV/0!	#DIV/0!	#DIV/0!	#DIV/0!	#DIV/0!	#DIV/0!	#DIV/0!	#DIV/0!	#DIV/0!	#DIV/0!		93	#DIV/0!	#DIV/0!	#DIV/0!	#DIV/0!	#DIV/0!	#DIV/0!	#DIV/0!	#DIV/0!	#DIV/0!
54	2000-01-01	1899-12-31 12:00:00		93	0	0	0	0	0	0	0	0	0	0		93	0	0	0	0	0	0	0	0	0	0		93	#DIV/0!	#DIV/0!	#DIV/0!	#DIV/0!	#DIV/0!	#DIV/0!	#DIV/0!	#DIV/0!	#DIV/0!	#DIV/0!		93	#DIV/0!	#DIV/0!	#DIV/0!	#DIV/0!	#DIV/0!	#DIV/0!	#DIV/0!	#DIV/0!	#DIV/0!
55	2000-01-01	1899-12-31 12:00:00		93	0	0	0	0	0	0	0	0	0	0		93	0	0	0	0	0	0	0	0	0	0		93	#DIV/0!	#DIV/0!	#DIV/0!	#DIV/0!	#DIV/0!	#DIV/0!	#DIV/0!	#DIV/0!	#DIV/0!	#DIV/0!		93	#DIV/0!	#DIV/0!	#DIV/0!	#DIV/0!	#DIV/0!	#DIV/0!	#DIV/0!	#DIV/0!	#DIV/0!
56	2000-01-01	1899-12-31 12:00:00		93	0	0	0	0	0	0	0	0	0	0		93	0	0	0	0	0	0	0	0	0	0		93	#DIV/0!	#DIV/0!	#DIV/0!	#DIV/0!	#DIV/0!	#DIV/0!	#DIV/0!	#DIV/0!	#DIV/0!	#DIV/0!		93	#DIV/0!	#DIV/0!	#DIV/0!	#DIV/0!	#DIV/0!	#DIV/0!	#DIV/0!	#DIV/0!	#DIV/0!
57	2000-01-01	1899-12-31 12:00:00		93	0	0	0	0	0	0	0	0	0	0		93	0	0	0	0	0	0	0	0	0	0		93	#DIV/0!	#DIV/0!	#DIV/0!	#DIV/0!	#DIV/0!	#DIV/0!	#DIV/0!	#DIV/0!	#DIV/0!	#DIV/0!		93	#DIV/0!	#DIV/0!	#DIV/0!	#DIV/0!	#DIV/0!	#DIV/0!	#DIV/0!	#DIV/0!	#DIV/0!
58	2000-01-01	1899-12-31 12:00:00		93	0	0	0	0	0	0	0	0	0	0		93	0	0	0	0	0	0	0	0	0	0		93	#DIV/0!	#DIV/0!	#DIV/0!	#DIV/0!	#DIV/0!	#DIV/0!	#DIV/0!	#DIV/0!	#DIV/0!	#DIV/0!		93	#DIV/0!	#DIV/0!	#DIV/0!	#DIV/0!	#DIV/0!	#DIV/0!	#DIV/0!	#DIV/0!	#DIV/0!
59	2000-01-01	1899-12-31 12:00:00		93	0	0	0	0	0	0	0	0	0	0		93	0	0	0	0	0	0	0	0	0	0		93	#DIV/0!	#DIV/0!	#DIV/0!	#DIV/0!	#DIV/0!	#DIV/0!	#DIV/0!	#DIV/0!	#DIV/0!	#DIV/0!		93	#DIV/0!	#DIV/0!	#DIV/0!	#DIV/0!	#DIV/0!	#DIV/0!	#DIV/0!	#DIV/0!	#DIV/0!
60	2000-01-01	1899-12-31 12:00:00		93	0	0	0	0	0	0	0	0	0	0		93	0	0	0	0	0	0	0	0	0	0		93	#DIV/0!	#DIV/0!	#DIV/0!	#DIV/0!	#DIV/0!	#DIV/0!	#DIV/0!	#DIV/0!	#DIV/0!	#DIV/0!		93	#DIV/0!	#DIV/0!	#DIV/0!	#DIV/0!	#DIV/0!	#DIV/0!	#DIV/0!	#DIV/0!	#DIV/0!
61	2000-01-01	1899-12-31 12:00:00		93	0	0	0	0	0	0	0	0	0	0		93	0	0	0	0	0	0	0	0	0	0		93	#DIV/0!	#DIV/0!	#DIV/0!	#DIV/0!	#DIV/0!	#DIV/0!	#DIV/0!	#DIV/0!	#DIV/0!	#DIV/0!		93	#DIV/0!	#DIV/0!	#DIV/0!	#DIV/0!	#DIV/0!	#DIV/0!	#DIV/0!	#DIV/0!	#DIV/0!
62	2000-01-01	1899-12-31 12:00:00		93	0	0	0	0	0	0	0	0	0	0		93	0	0	0	0	0	0	0	0	0	0		93	#DIV/0!	#DIV/0!	#DIV/0!	#DIV/0!	#DIV/0!	#DIV/0!	#DIV/0!	#DIV/0!	#DIV/0!	#DIV/0!		93	#DIV/0!	#DIV/0!	#DIV/0!	#DIV/0!	#DIV/0!	#DIV/0!	#DIV/0!	#DIV/0!	#DIV/0!
63	2000-01-01	1899-12-31 12:00:00		93	0	0	0	0	0	0	0	0	0	0		93	0	0	0	0	0	0	0	0	0	0		93	#DIV/0!	#DIV/0!	#DIV/0!	#DIV/0!	#DIV/0!	#DIV/0!	#DIV/0!	#DIV/0!	#DIV/0!	#DIV/0!		93	#DIV/0!	#DIV/0!	#DIV/0!	#DIV/0!	#DIV/0!	#DIV/0!	#DIV/0!	#DIV/0!	#DIV/0!
64	2000-01-01	1899-12-31 12:00:00		93	0	0	0	0	0	0	0	0	0	0		93	0	0	0	0	0	0	0	0	0	0		93	#DIV/0!	#DIV/0!	#DIV/0!	#DIV/0!	#DIV/0!	#DIV/0!	#DIV/0!	#DIV/0!	#DIV/0!	#DIV/0!		93	#DIV/0!	#DIV/0!	#DIV/0!	#DIV/0!	#DIV/0!	#DIV/0!	#DIV/0!	#DIV/0!	#DIV/0!
65	2000-01-01	1899-12-31 12:00:00		93	0	0	0	0	0	0	0	0	0	0		93	0	0	0	0	0	0	0	0	0	0		93	#DIV/0!	#DIV/0!	#DIV/0!	#DIV/0!	#DIV/0!	#DIV/0!	#DIV/0!	#DIV/0!	#DIV/0!	#DIV/0!		93	#DIV/0!	#DIV/0!	#DIV/0!	#DIV/0!	#DIV/0!	#DIV/0!	#DIV/0!	#DIV/0!	#DIV/0!
66	2000-01-01	1899-12-31 12:00:00		93	0	0	0	0	0	0	0	0	0	0		93	0	0	0	0	0	0	0	0	0	0		93	#DIV/0!	#DIV/0!	#DIV/0!	#DIV/0!	#DIV/0!	#DIV/0!	#DIV/0!	#DIV/0!	#DIV/0!	#DIV/0!		93	#DIV/0!	#DIV/0!	#DIV/0!	#DIV/0!	#DIV/0!	#DIV/0!	#DIV/0!	#DIV/0!	#DIV/0!
67	2000-01-01	1899-12-31 12:00:00		93	0	0	0	0	0	0	0	0	0	0		93	0	0	0	0	0	0	0	0	0	0		93	#DIV/0!	#DIV/0!	#DIV/0!	#DIV/0!	#DIV/0!	#DIV/0!	#DIV/0!	#DIV/0!	#DIV/0!	#DIV/0!		93	#DIV/0!	#DIV/0!	#DIV/0!	#DIV/0!	#DIV/0!	#DIV/0!	#DIV/0!	#DIV/0!	#DIV/0!
68	2000-01-01	1899-12-31 12:00:00		93	0	0	0	0	0	0	0	0	0	0		93	0	0	0	0	0	0	0	0	0	0		93	#DIV/0!	#DIV/0!	#DIV/0!	#DIV/0!	#DIV/0!	#DIV/0!	#DIV/0!	#DIV/0!	#DIV/0!	#DIV/0!		93	#DIV/0!	#DIV/0!	#DIV/0!	#DIV/0!	#DIV/0!	#DIV/0!	#DIV/0!	#DIV/0!	#DIV/0!
69	2000-01-01	1899-12-31 12:00:00		93	0	0	0	0	0	0	0	0	0	0		93	0	0	0	0	0	0	0	0	0	0		93	#DIV/0!	#DIV/0!	#DIV/0!	#DIV/0!	#DIV/0!	#DIV/0!	#DIV/0!	#DIV/0!	#DIV/0!	#DIV/0!		93	#DIV/0!	#DIV/0!	#DIV/0!	#DIV/0!	#DIV/0!	#DIV/0!	#DIV/0!	#DIV/0!	#DIV/0!
70	2000-01-01	1899-12-31 12:00:00		93	0	0	0	0	0	0	0	0	0	0		93	0	0	0	0	0	0	0	0	0	0		93	#DIV/0!	#DIV/0!	#DIV/0!	#DIV/0!	#DIV/0!	#DIV/0!	#DIV/0!	#DIV/0!	#DIV/0!	#DIV/0!		93	#DIV/0!	#DIV/0!	#DIV/0!	#DIV/0!	#DIV/0!	#DIV/0!	#DIV/0!	#DIV/0!	#DIV/0!
71	2000-01-01	1899-12-31 12:00:00		93	0	0	0	0	0	0	0	0	0	0		93	0	0	0	0	0	0	0	0	0	0		93	#DIV/0!	#DIV/0!	#DIV/0!	#DIV/0!	#DIV/0!	#DIV/0!	#DIV/0!	#DIV/0!	#DIV/0!	#DIV/0!		93	#DIV/0!	#DIV/0!	#DIV/0!	#DIV/0!	#DIV/0!	#DIV/0!	#DIV/0!	#DIV/0!	#DIV/0!
72	2000-01-01	1899-12-31 12:00:00		93	0	0	0	0	0	0	0	0	0	0		93	0	0	0	0	0	0	0	0	0	0		93	#DIV/0!	#DIV/0!	#DIV/0!	#DIV/0!	#DIV/0!	#DIV/0!	#DIV/0!	#DIV/0!	#DIV/0!	#DIV/0!		93	#DIV/0!	#DIV/0!	#DIV/0!	#DIV/0!	#DIV/0!	#DIV/0!	#DIV/0!	#DIV/0!	#DIV/0!
73	2000-01-01	1899-12-31 12:00:00		93	0	0	0	0	0	0	0	0	0	0		93	0	0	0	0	0	0	0	0	0	0		93	#DIV/0!	#DIV/0!	#DIV/0!	#DIV/0!	#DIV/0!	#DIV/0!	#DIV/0!	#DIV/0!	#DIV/0!	#DIV/0!		93	#DIV/0!	#DIV/0!	#DIV/0!	#DIV/0!	#DIV/0!	#DIV/0!	#DIV/0!	#DIV/0!	#DIV/0!
74	2000-01-01	1899-12-31 12:00:00		93	0	0	0	0	0	0	0	0	0	0		93	0	0	0	0	0	0	0	0	0	0		93	#DIV/0!	#DIV/0!	#DIV/0!	#DIV/0!	#DIV/0!	#DIV/0!	#DIV/0!	#DIV/0!	#DIV/0!	#DIV/0!		93	#DIV/0!	#DIV/0!	#DIV/0!	#DIV/0!	#DIV/0!	#DIV/0!	#DIV/0!	#DIV/0!	#DIV/0!
75	2000-01-01	1899-12-31 12:00:00		93	0	0	0	0	0	0	0	0	0	0		93	0	0	0	0	0	0	0	0	0	0		93	#DIV/0!	#DIV/0!	#DIV/0!	#DIV/0!	#DIV/0!	#DIV/0!	#DIV/0!	#DIV/0!	#DIV/0!	#DIV/0!		93	#DIV/0!	#DIV/0!	#DIV/0!	#DIV/0!	#DIV/0!	#DIV/0!	#DIV/0!	#DIV/0!	#DIV/0!
				censors
				day	UAS-InR RU +	UAS-InR RU -	W1118 RU +	W1118 RU -	UAS-InR DN BL RU +	UAS-InR DN BL RU -	UAS-InR DN RU +	UAS-InR DN RU -	UAS-InR active RU +	UAS-InR active RU -
	2017-10-03	1899-12-31 12:00:00		0	0	0	0	0	0	0	0	0	0	0
1	2017-10-04	1899-12-31 12:00:00		1	1	1	1	0	0	2	1	2	1	0
2	2017-10-06	1899-12-31 12:00:00		3	0	0	0	0	0	0	0	0	0	0
3	2017-10-09	1899-12-31 12:00:00		6	0	0	0	0	0	0	0	0	0	0
4	2017-10-11	1899-12-31 12:00:00		8	0	1	0	0	0	0	0	0	0	0
5	2017-10-14	1899-12-31 12:00:00		11	2	0	0	0	0	0	0	1	1	0
6	2017-10-16	1899-12-31 12:00:00		13	0	0	0	0	0	0	0	1	1	0
7	2017-10-18	1899-12-31 12:00:00		15	2	0	1	0	0	0	1	0	1	0
8	2017-10-20	1899-12-31 12:00:00		17	2	0	2	0	0	0	0	1	1	0
9	2017-10-23	1899-12-31 12:00:00		20	4	6	4	0	6	0	0	6	8	0
10	2017-10-25	1899-12-31 12:00:00		22	1	0	0	0	0	1	0	0	1	0
11	2017-10-27	1899-12-31 12:00:00		24	0	0	0	0	0	0	0	0	0	0
12	2017-10-30	1899-12-31 12:00:00		27	0	0	0	0	1	0	0	0	0	0
13	2017-11-01	1899-12-31 12:00:00		29	0	0	0	0	0	0	0	0	0	0
14	2017-11-03	1899-12-31 12:00:00		31	0	0	0	0	0	0	0	0	0	0
15	2017-11-06	1899-12-31 12:00:00		34	1	0	0	0	0	0	0	0	0	0
16	2017-11-08	1899-12-31 12:00:00		36	0	0	0	0	0	0	0	0	0	0
17	2017-11-10	1899-12-31 12:00:00		38	0	1	0	0	0	0	0	0	0	0
18	2017-11-13	1899-12-31 12:00:00		41	0	0	0	0	0	1	0	0	0	0
19	2017-11-15	1899-12-31 12:00:00		43	0	0	0	1	0	0	0	0	0	0
20	2017-11-17	1899-12-31 12:00:00		45	0	0	0	0	0	0	0	0	0	0
21	2017-11-20	1899-12-31 12:00:00		48	0	2	0	0	0	1	0	1	0	3
22	2017-11-22	1899-12-31 12:00:00		50	0	0	0	0	0	0	0	0	0	0
23	2017-11-24	1899-12-31 12:00:00		52	0	0	0	0	0	0	0	0	0	0
24	2017-11-27	1899-12-31 12:00:00		55	0	0	0	0	0	1	0	0	0	0
25	2017-11-29	1899-12-31 12:00:00		57	0	0	0	0	0	0	0	0	0	0
26	2017-12-01	1899-12-31 12:00:00		59	0	0	0	0	0	2	0	1	0	0
27	2017-12-04	1899-12-31 12:00:00		62	0	0	0	0	0	1	0	0	0	2
28	2017-12-06	1899-12-31 12:00:00		64	0	0	0	0	0	0	0	0	0	0
29	2017-12-08	1899-12-31 12:00:00		66	0	0	0	0	0	1	0	0	0	0
30	2017-12-11	1899-12-31 12:00:00		69	0	0	0	0	0	0	0	0	0	3
31	2017-12-13	1899-12-31 12:00:00		71	0	0	0	1	0	0	0	0	0	0
32	2017-12-15	1899-12-31 12:00:00		73	0	1	0	0	0	0	0	0	0	0
33	2017-12-18	1899-12-31 12:00:00		76	0	0	0	0	0	0	0	0	0	0
34	2017-12-20	1899-12-31 12:00:00		78	0	0	0	0	0	0	0	0	0	0
35	2017-12-22	1899-12-31 12:00:00		80	0	0	0	0	0	0	0	0	0	0
36	2017-12-24	1899-12-31 12:00:00		82	0	0	0	0	0	0	0	0	0	0
37	2017-12-27	1899-12-31 12:00:00		85	0	0	0	0	0	0	0	0	0	0
38	2017-12-30	1899-12-31 12:00:00		88	0	0	0	0	0	0	0	0	0	0
39	2018-01-02	1899-12-31 12:00:00		91	0	0	0	0	0	0	0	0	0	0
40	2018-01-04	1899-12-31 12:00:00		93	0	1	0	0	0	0	0	1	0	1
41	2000-01-01	1899-12-31 12:00:00		93	0	0	0	0	0	0	0	0	0	0
42	2000-01-01	1899-12-31 12:00:00		93	0	0	0	0	0	0	0	0	0	0
43	2000-01-01	1899-12-31 12:00:00		93	0	0	0	0	0	0	0	0	0	0
44	2000-01-01	1899-12-31 12:00:00		93	0	0	0	0	0	0	0	0	0	0
45	2000-01-01	1899-12-31 12:00:00		93	0	0	0	0	0	0	0	0	0	0
46	2000-01-01	1899-12-31 12:00:00		93	0	0	0	0	0	0	0	0	0	0
47	2000-01-01	1899-12-31 12:00:00		93	0	0	0	0	0	0	0	0	0	0
48	2000-01-01	1899-12-31 12:00:00		93	0	0	0	0	0	0	0	0	0	0
49	2000-01-01	1899-12-31 12:00:00		93	0	0	0	0	0	0	0	0	0	0
50	2000-01-01	1899-12-31 12:00:00		93	0	0	0	0	0	0	0	0	0	0
51	2000-01-01	1899-12-31 12:00:00		93	0	0	0	0	0	0	0	0	0	0
52	2000-01-01	1899-12-31 12:00:00		93	0	0	0	0	0	0	0	0	0	0
53	2000-01-01	1899-12-31 12:00:00		93	0	0	0	0	0	0	0	0	0	0
54	2000-01-01	1899-12-31 12:00:00		93	0	0	0	0	0	0	0	0	0	0
55	2000-01-01	1899-12-31 12:00:00		93	0	0	0	0	0	0	0	0	0	0
56	2000-01-01	1899-12-31 12:00:00		93	0	0	0	0	0	0	0	0	0	0
57	2000-01-01	1899-12-31 12:00:00		93	0	0	0	0	0	0	0	0	0	0
58	2000-01-01	1899-12-31 12:00:00		93	0	0	0	0	0	0	0	0	0	0
59	2000-01-01	1899-12-31 12:00:00		93	0	0	0	0	0	0	0	0	0	0
60	2000-01-01	1899-12-31 12:00:00		93	0	0	0	0	0	0	0	0	0	0
61	2000-01-01	1899-12-31 12:00:00		93	0	0	0	0	0	0	0	0	0	0
62	2000-01-01	1899-12-31 12:00:00		93	0	0	0	0	0	0	0	0	0	0
63	2000-01-01	1899-12-31 12:00:00		93	0	0	0	0	0	0	0	0	0	0
64	2000-01-01	1899-12-31 12:00:00		93	0	0	0	0	0	0	0	0	0	0
65	2000-01-01	1899-12-31 12:00:00		93	0	0	0	0	0	0	0	0	0	0
66	2000-01-01	1899-12-31 12:00:00		93	0	0	0	0	0	0	0	0	0	0
67	2000-01-01	1899-12-31 12:00:00		93	0	0	0	0	0	0	0	0	0	0
68	2000-01-01	1899-12-31 12:00:00		93	0	0	0	0	0	0	0	0	0	0
69	2000-01-01	1899-12-31 12:00:00		93	0	0	0	0	0	0	0	0	0	0
70	2000-01-01	1899-12-31 12:00:00		93	0	0	0	0	0	0	0	0	0	0
71	2000-01-01	1899-12-31 12:00:00		93	0	0	0	0	0	0	0	0	0	0
72	2000-01-01	1899-12-31 12:00:00		93	0	0	0	0	0	0	0	0	0	0
73	2000-01-01	1899-12-31 12:00:00		93	0	0	0	0	0	0	0	0	0	0
74	2000-01-01	1899-12-31 12:00:00		93	0	0	0	0	0	0	0	0	0	0
75	2000-01-01	1899-12-31 12:00:00		93	0	0	0	0	0	0	0	0	0	0
[truncated: 84 more columns]

## Sheet: egg data
		treatment start date	2017-10-03																				total eggs laid per ave female
																								food	ave of sum egg production for ave female	error		median LS
	date on food
	time on food																							UAS-InR RU +	#DIV/0!	#DIV/0!		23
	date off food																							UAS-InR RU -	#DIV/0!	#DIV/0!		67.5
	time off food																							W1118 RU +	#DIV/0!	#DIV/0!		16
	day		-43011		-43011		-43011		-43011		-43011		-43011		-43011		-43011		-43011		-43011			W1118 RU -	#DIV/0!	#DIV/0!		67.5
	time on food (h)		0		0		0		0		0		0		0		0		0		0			UAS-InR DN BL RU +	#DIV/0!	#DIV/0!		16
	fraction of 24h		0		0		0		0		0		0		0		0		0		0			UAS-InR DN BL RU -	#DIV/0!	#DIV/0!		67.5
		flies in		flies in		flies in		flies in		flies in		flies in		flies in		flies in		flies in		flies in				UAS-InR DN RU +	#DIV/0!	#DIV/0!		9.5
UAS-InR RU +		vial		vial		vial		vial		vial		vial		vial		vial		vial		vial				UAS-InR DN RU -	#DIV/0!	#DIV/0!		72
	1	#N/A		#N/A		#N/A		#N/A		#N/A		#N/A		#N/A		#N/A		#N/A		#N/A				UAS-InR active RU +	#DIV/0!	#DIV/0!		25.5
	2	#N/A		#N/A		#N/A		#N/A		#N/A		#N/A		#N/A		#N/A		#N/A		#N/A				UAS-InR active RU -	#DIV/0!	#DIV/0!		72
	3	#N/A		#N/A		#N/A		#N/A		#N/A		#N/A		#N/A		#N/A		#N/A		#N/A
	4	#N/A		#N/A		#N/A		#N/A		#N/A		#N/A		#N/A		#N/A		#N/A		#N/A
	5	#N/A		#N/A		#N/A		#N/A		#N/A		#N/A		#N/A		#N/A		#N/A		#N/A
	6	#N/A		#N/A		#N/A		#N/A		#N/A		#N/A		#N/A		#N/A		#N/A		#N/A
	7	#N/A		#N/A		#N/A		#N/A		#N/A		#N/A		#N/A		#N/A		#N/A		#N/A
	8	#N/A		#N/A		#N/A		#N/A		#N/A		#N/A		#N/A		#N/A		#N/A		#N/A
	9	#N/A		#N/A		#N/A		#N/A		#N/A		#N/A		#N/A		#N/A		#N/A		#N/A
	10	#N/A		#N/A		#N/A		#N/A		#N/A		#N/A		#N/A		#N/A		#N/A		#N/A
eggs per 24 h per female
			#DIV/0!																			sum	#DIV/0!
			#DIV/0!																				#DIV/0!
			#DIV/0!																				#DIV/0!
			#DIV/0!																				#DIV/0!
			#DIV/0!																				#DIV/0!
			#DIV/0!																				#DIV/0!
			#DIV/0!																				#DIV/0!
			#DIV/0!																				#DIV/0!
			#DIV/0!																				#DIV/0!
			#DIV/0!																				#DIV/0!
	average		#DIV/0!																			ave	#DIV/0!
	sd		#DIV/0!																			n	0
	n		0																			sd	#DIV/0!
	se		#DIV/0!																			error	#DIV/0!
UAS-InR RU -
	21	#N/A		#N/A		#N/A		#N/A		#N/A		#N/A		#N/A		#N/A		#N/A		#N/A
	22	#N/A		#N/A		#N/A		#N/A		#N/A		#N/A		#N/A		#N/A		#N/A		#N/A
	23	#N/A		#N/A		#N/A		#N/A		#N/A		#N/A		#N/A		#N/A		#N/A		#N/A
	24	#N/A		#N/A		#N/A		#N/A		#N/A		#N/A		#N/A		#N/A		#N/A		#N/A
	25	#N/A		#N/A		#N/A		#N/A		#N/A		#N/A		#N/A		#N/A		#N/A		#N/A
	26	#N/A		#N/A		#N/A		#N/A		#N/A		#N/A		#N/A		#N/A		#N/A		#N/A
	27	#N/A		#N/A		#N/A		#N/A		#N/A		#N/A		#N/A		#N/A		#N/A		#N/A
	28	#N/A		#N/A		#N/A		#N/A		#N/A		#N/A		#N/A		#N/A		#N/A		#N/A
	29	#N/A		#N/A		#N/A		#N/A		#N/A		#N/A		#N/A		#N/A		#N/A		#N/A
	30	#N/A		#N/A		#N/A		#N/A		#N/A		#N/A		#N/A		#N/A		#N/A		#N/A
eggs per 24 h per female
			#DIV/0!																			sum	#DIV/0!
			#DIV/0!																				#DIV/0!
			#DIV/0!																				#DIV/0!
			#DIV/0!																				#DIV/0!
			#DIV/0!																				#DIV/0!
			#DIV/0!																				#DIV/0!
			#DIV/0!																				#DIV/0!
			#DIV/0!																				#DIV/0!
			#DIV/0!																				#DIV/0!
			#DIV/0!																				#DIV/0!
	average		#DIV/0!																			ave	#DIV/0!
	sd		#DIV/0!																			n	0
	n		0																			sd	#DIV/0!
	se		#DIV/0!																			error	#DIV/0!
W1118 RU +
	41	#N/A		#N/A		#N/A		#N/A		#N/A		#N/A		#N/A		#N/A		#N/A		#N/A
	42	#N/A		#N/A		#N/A		#N/A		#N/A		#N/A		#N/A		#N/A		#N/A		#N/A
	43	#N/A		#N/A		#N/A		#N/A		#N/A		#N/A		#N/A		#N/A		#N/A		#N/A
	44	#N/A		#N/A		#N/A		#N/A		#N/A		#N/A		#N/A		#N/A		#N/A		#N/A
	45	#N/A		#N/A		#N/A		#N/A		#N/A		#N/A		#N/A		#N/A		#N/A		#N/A
	46	#N/A		#N/A		#N/A		#N/A		#N/A		#N/A		#N/A		#N/A		#N/A		#N/A
	47	#N/A		#N/A		#N/A		#N/A		#N/A		#N/A		#N/A		#N/A		#N/A		#N/A
	48	#N/A		#N/A		#N/A		#N/A		#N/A		#N/A		#N/A		#N/A		#N/A		#N/A
	49	#N/A		#N/A		#N/A		#N/A		#N/A		#N/A		#N/A		#N/A		#N/A		#N/A
	50	#N/A		#N/A		#N/A		#N/A		#N/A		#N/A		#N/A		#N/A		#N/A		#N/A
eggs per 24 h per female
			#DIV/0!																			sum	#DIV/0!
			#DIV/0!																				#DIV/0!
			#DIV/0!																				#DIV/0!
			#DIV/0!																				#DIV/0!
			#DIV/0!																				#DIV/0!
			#DIV/0!																				#DIV/0!
			#DIV/0!																				#DIV/0!
			#DIV/0!																				#DIV/0!
			#DIV/0!																				#DIV/0!
			#DIV/0!																				#DIV/0!
	average		#DIV/0!																			ave	#DIV/0!
	sd		#DIV/0!																			n	0
	n		0																			sd	#DIV/0!
	se		#DIV/0!																			error	#DIV/0!
W1118 RU -
	61	#N/A		#N/A		#N/A		#N/A		#N/A		#N/A		#N/A		#N/A		#N/A		#N/A
	62	#N/A		#N/A		#N/A		#N/A		#N/A		#N/A		#N/A		#N/A		#N/A		#N/A
	63	#N/A		#N/A		#N/A		#N/A		#N/A		#N/A		#N/A		#N/A		#N/A		#N/A
	64	#N/A		#N/A		#N/A		#N/A		#N/A		#N/A		#N/A		#N/A		#N/A		#N/A
	65	#N/A		#N/A		#N/A		#N/A		#N/A		#N/A		#N/A		#N/A		#N/A		#N/A
	66	#N/A		#N/A		#N/A		#N/A		#N/A		#N/A		#N/A		#N/A		#N/A		#N/A
	67	#N/A		#N/A		#N/A		#N/A		#N/A		#N/A		#N/A		#N/A		#N/A		#N/A
	68	#N/A		#N/A		#N/A		#N/A		#N/A		#N/A		#N/A		#N/A		#N/A		#N/A
	69	#N/A		#N/A		#N/A		#N/A		#N/A		#N/A		#N/A		#N/A		#N/A		#N/A
	70	#N/A		#N/A		#N/A		#N/A		#N/A		#N/A		#N/A		#N/A		#N/A		#N/A
eggs per 24 h per female
			#DIV/0!																			sum	#DIV/0!
			#DIV/0!																				#DIV/0!
			#DIV/0!																				#DIV/0!
			#DIV/0!																				#DIV/0!
			#DIV/0!																				#DIV/0!
			#DIV/0!																				#DIV/0!
			#DIV/0!																				#DIV/0!
			#DIV/0!																				#DIV/0!
			#DIV/0!																				#DIV/0!
			#DIV/0!																				#DIV/0!
	average		#DIV/0!																			ave	#DIV/0!
	sd		#DIV/0!																			n	0
	n		0																			sd	#DIV/0!
	se		#DIV/0!																			error	#DIV/0!
UAS-InR DN BL RU +
	81	#N/A		#N/A		#N/A		#N/A		#N/A		#N/A		#N/A		#N/A		#N/A		#N/A
	82	#N/A		#N/A		#N/A		#N/A		#N/A		#N/A		#N/A		#N/A		#N/A		#N/A
	83	#N/A		#N/A		#N/A		#N/A		#N/A		#N/A		#N/A		#N/A		#N/A		#N/A
	84	#N/A		#N/A		#N/A		#N/A		#N/A		#N/A		#N/A		#N/A		#N/A		#N/A
	85	#N/A		#N/A		#N/A		#N/A		#N/A		#N/A		#N/A		#N/A		#N/A		#N/A
	86	#N/A		#N/A		#N/A		#N/A		#N/A		#N/A		#N/A		#N/A		#N/A		#N/A
	87	#N/A		#N/A		#N/A		#N/A		#N/A		#N/A		#N/A		#N/A		#N/A		#N/A
	88	#N/A		#N/A		#N/A		#N/A		#N/A		#N/A		#N/A		#N/A		#N/A		#N/A
	89	#N/A		#N/A		#N/A		#N/A		#N/A		#N/A		#N/A		#N/A		#N/A		#N/A
	90	#N/A		#N/A		#N/A		#N/A		#N/A		#N/A		#N/A		#N/A		#N/A		#N/A
eggs per 24 h per female
			#DIV/0!																			sum	#DIV/0!
			#DIV/0!																				#DIV/0!
			#DIV/0!																				#DIV/0!
			#DIV/0!																				#DIV/0!
			#DIV/0!																				#DIV/0!
			#DIV/0!																				#DIV/0!
			#DIV/0!																				#DIV/0!
			#DIV/0!																				#DIV/0!
			#DIV/0!																				#DIV/0!
			#DIV/0!																				#DIV/0!
	average		#DIV/0!																			ave	#DIV/0!
	sd		#DIV/0!																			n	0
	n		0																			sd	#DIV/0!
	se		#DIV/0!																			error	#DIV/0!
UAS-InR DN BL RU -
	101	#N/A		#N/A		#N/A		#N/A		#N/A		#N/A		#N/A		#N/A		#N/A		#N/A
	102	#N/A		#N/A		#N/A		#N/A		#N/A		#N/A		#N/A		#N/A		#N/A		#N/A
	103	#N/A		#N/A		#N/A		#N/A		#N/A		#N/A		#N/A		#N/A		#N/A		#N/A
	104	#N/A		#N/A		#N/A		#N/A		#N/A		#N/A		#N/A		#N/A		#N/A		#N/A
	105	#N/A		#N/A		#N/A		#N/A		#N/A		#N/A		#N/A		#N/A		#N/A		#N/A
	106	#N/A		#N/A		#N/A		#N/A		#N/A		#N/A		#N/A		#N/A		#N/A		#N/A
	107	#N/A		#N/A		#N/A		#N/A		#N/A		#N/A		#N/A		#N/A		#N/A		#N/A
	108	#N/A		#N/A		#N/A		#N/A		#N/A		#N/A		#N/A		#N/A		#N/A		#N/A
	109	#N/A		#N/A		#N/A		#N/A		#N/A		#N/A		#N/A		#N/A		#N/A		#N/A
	110	#N/A		#N/A		#N/A		#N/A		#N/A		#N/A		#N/A		#N/A		#N/A		#N/A
eggs per 24 h per female
			#DIV/0!																			sum	#DIV/0!
			#DIV/0!																				#DIV/0!
			#DIV/0!																				#DIV/0!
			#DIV/0!																				#DIV/0!
			#DIV/0!																				#DIV/0!
			#DIV/0!																				#DIV/0!
			#DIV/0!																				#DIV/0!
			#DIV/0!																				#DIV/0!
			#DIV/0!																				#DIV/0!
			#DIV/0!																				#DIV/0!
	average		#DIV/0!																			ave	#DIV/0!
	sd		#DIV/0!																			n	0
	n		0																			sd	#DIV/0!
	se		#DIV/0!																			error	#DIV/0!
UAS-InR DN RU +
	121	#N/A		#N/A		#N/A		#N/A		#N/A		#N/A		#N/A		#N/A		#N/A		#N/A
	122	#N/A		#N/A		#N/A		#N/A		#N/A		#N/A		#N/A		#N/A		#N/A		#N/A
	123	#N/A		#N/A		#N/A		#N/A		#N/A		#N/A		#N/A		#N/A		#N/A		#N/A
	124	#N/A		#N/A		#N/A		#N/A		#N/A		#N/A		#N/A		#N/A		#N/A		#N/A
	125	#N/A		#N/A		#N/A		#N/A		#N/A		#N/A		#N/A		#N/A		#N/A		#N/A
	126	#N/A		#N/A		#N/A		#N/A		#N/A		#N/A		#N/A		#N/A		#N/A		#N/A
	127	#N/A		#N/A		#N/A		#N/A		#N/A		#N/A		#N/A		#N/A		#N/A		#N/A
	128	#N/A		#N/A		#N/A		#N/A		#N/A		#N/A		#N/A		#N/A		#N/A		#N/A
	129	#N/A		#N/A		#N/A		#N/A		#N/A		#N/A		#N/A		#N/A		#N/A		#N/A
	130	#N/A		#N/A		#N/A		#N/A		#N/A		#N/A		#N/A		#N/A		#N/A		#N/A
eggs per 24 h per female
			#DIV/0!																			sum	#DIV/0!
			#DIV/0!																				#DIV/0!
			#DIV/0!																				#DIV/0!
			#DIV/0!																				#DIV/0!
			#DIV/0!																				#DIV/0!
			#DIV/0!																				#DIV/0!
			#DIV/0!																				#DIV/0!
			#DIV/0!																				#DIV/0!
			#DIV/0!																				#DIV/0!
			#DIV/0!																				#DIV/0!
	average		#DIV/0!																			ave	#DIV/0!
	sd		#DIV/0!																			n	0
	n		0																			sd	#DIV/0!
	se		#DIV/0!																			error	#DIV/0!
UAS-InR DN RU -
	141	#N/A		#N/A		#N/A		#N/A		#N/A		#N/A		#N/A		#N/A		#N/A		#N/A
	142	#N/A		#N/A		#N/A		#N/A		#N/A		#N/A		#N/A		#N/A		#N/A		#N/A
	143	#N/A		#N/A		#N/A		#N/A		#N/A		#N/A		#N/A		#N/A		#N/A		#N/A
	144	#N/A		#N/A		#N/A		#N/A		#N/A		#N/A		#N/A		#N/A		#N/A		#N/A
	145	#N/A		#N/A		#N/A		#N/A		#N/A		#N/A		#N/A		#N/A		#N/A		#N/A
	146	#N/A		#N/A		#N/A		#N/A		#N/A		#N/A		#N/A		#N/A		#N/A		#N/A
	147	#N/A		#N/A		#N/A		#N/A		#N/A		#N/A		#N/A		#N/A		#N/A		#N/A
	148	#N/A		#N/A		#N/A		#N/A		#N/A		#N/A		#N/A		#N/A		#N/A		#N/A
	149	#N/A		#N/A		#N/A		#N/A		#N/A		#N/A		#N/A		#N/A		#N/A		#N/A
	150	#N/A		#N/A		#N/A		#N/A		#N/A		#N/A		#N/A		#N/A		#N/A		#N/A
eggs per 24 h per female
			#DIV/0!																			sum	#DIV/0!
			#DIV/0!																				#DIV/0!
			#DIV/0!																				#DIV/0!
			#DIV/0!																				#DIV/0!
			#DIV/0!																				#DIV/0!
			#DIV/0!																				#DIV/0!
			#DIV/0!																				#DIV/0!
			#DIV/0!																				#DIV/0!
			#DIV/0!																				#DIV/0!
			#DIV/0!																				#DIV/0!
	average		#DIV/0!																			ave	#DIV/0!
	sd		#DIV/0!																			n	0
	n		0																			sd	#DIV/0!
	se		#DIV/0!																			error	#DIV/0!
UAS-InR active RU +
	161	#N/A		#N/A		#N/A		#N/A		#N/A		#N/A		#N/A		#N/A		#N/A		#N/A
	162	#N/A		#N/A		#N/A		#N/A		#N/A		#N/A		#N/A		#N/A		#N/A		#N/A
	163	#N/A		#N/A		#N/A		#N/A		#N/A		#N/A		#N/A		#N/A		#N/A		#N/A
	164	#N/A		#N/A		#N/A		#N/A		#N/A		#N/A		#N/A		#N/A		#N/A		#N/A
	165	#N/A		#N/A		#N/A		#N/A		#N/A		#N/A		#N/A		#N/A		#N/A		#N/A
	166	#N/A		#N/A		#N/A		#N/A		#N/A		#N/A		#N/A		#N/A		#N/A		#N/A
	167	#N/A		#N/A		#N/A		#N/A		#N/A		#N/A		#N/A		#N/A		#N/A		#N/A
	168	#N/A		#N/A		#N/A		#N/A		#N/A		#N/A		#N/A		#N/A		#N/A		#N/A
	169	#N/A		#N/A		#N/A		#N/A		#N/A		#N/A		#N/A		#N/A		#N/A		#N/A
	170	#N/A		#N/A		#N/A		#N/A		#N/A		#N/A		#N/A		#N/A		#N/A		#N/A
eggs per 24 h per female
			#DIV/0!																			sum	#DIV/0!
			#DIV/0!																				#DIV/0!
			#DIV/0!																				#DIV/0!
			#DIV/0!																				#DIV/0!
			#DIV/0!																				#DIV/0!
			#DIV/0!																				#DIV/0!
			#DIV/0!																				#DIV/0!
			#DIV/0!																				#DIV/0!
			#DIV/0!																				#DIV/0!
			#DIV/0!																				#DIV/0!
	average		#DIV/0!																			ave	#DIV/0!
	sd		#DIV/0!																			n	0
	n		0																			sd	#DIV/0!
	se		#DIV/0!																			error	#DIV/0!
UAS-InR active RU -
	181	#N/A		#N/A		#N/A		#N/A		#N/A		#N/A		#N/A		#N/A		#N/A		#N/A
	182	#N/A		#N/A		#N/A		#N/A		#N/A		#N/A		#N/A		#N/A		#N/A		#N/A
	183	#N/A		#N/A		#N/A		#N/A		#N/A		#N/A		#N/A		#N/A		#N/A		#N/A
	184	#N/A		#N/A		#N/A		#N/A		#N/A		#N/A		#N/A		#N/A		#N/A		#N/A
	185	#N/A		#N/A		#N/A		#N/A		#N/A		#N/A		#N/A		#N/A		#N/A		#N/A
	186	#N/A		#N/A		#N/A		#N/A		#N/A		#N/A		#N/A		#N/A		#N/A		#N/A
	187	#N/A		#N/A		#N/A		#N/A		#N/A		#N/A		#N/A		#N/A		#N/A		#N/A
	188	#N/A		#N/A		#N/A		#N/A		#N/A		#N/A		#N/A		#N/A		#N/A		#N/A
	189	#N/A		#N/A		#N/A		#N/A		#N/A		#N/A		#N/A		#N/A		#N/A		#N/A
	190	#N/A		#N/A		#N/A		#N/A		#N/A		#N/A		#N/A		#N/A		#N/A		#N/A
eggs per 24 h per female
			#DIV/0!																			sum	#DIV/0!
			#DIV/0!																				#DIV/0!
			#DIV/0!																				#DIV/0!
			#DIV/0!																				#DIV/0!
			#DIV/0!																				#DIV/0!
			#DIV/0!																				#DIV/0!
			#DIV/0!																				#DIV/0!
			#DIV/0!																				#DIV/0!
			#DIV/0!																				#DIV/0!
			#DIV/0!																				#DIV/0!
	average		#DIV/0!																			ave	#DIV/0!
	sd		#DIV/0!																			n	0
	n		0																			sd	#DIV/0!
	se		#DIV/0!																			error	#DIV/0!

## Sheet: popn per bottle
EXPERIMENT	(G4C2)36 and InR signaling
CONDITION	UAS-InR RU +						sum deaths		141			censored		13								CONDITION	UAS-InR DN BL RU -						sum deaths		144			censored		10
	1	2	3	4	5	6	7	8	9	10	11	12	13	14	15	16	17	18	19	20			101	102	103	104	105	106	107	108	109	110	111	112	113	114	115	116	117	118	119	120
dead	13	15	12	14	14	14	16	15	13	15	0	0	0	0	0	0	0	0	0	0		dead	14	12	16	13	14	18	15	13	14	15	0	0	0	0	0	0	0	0	0	0
censored	3	0	2	1	0	1	0	2	3	1	0	0	0	0	0	0	0	0	0	0		censored	0	0	1	2	1	2	0	1	3	0	0	0	0	0	0	0	0	0	0	0
remaining per bottle	-1	0	1	0	1	0	-1	-2	-1	-1	15	15	15	15	15	15	15	15	15	15		remaining per bottle	1	3	-2	0	0	-5	0	1	-2	0	15	15	15	15	15	15	15	15	15	15
CONDITION	UAS-InR RU -						sum deaths		140			censored		13								CONDITION	UAS-InR DN RU +						sum deaths		150			censored		2
	21	22	23	24	25	26	27	28	29	30	31	32	33	34	35	36	37	38	39	40			121	122	123	124	125	126	127	128	129	130	131	132	133	134	135	136	137	138	139	140
dead	14	7	15	16	14	14	15	16	13	16	0	0	0	0	0	0	0	0	0	0		dead	15	15	18	15	15	15	14	14	15	14	0	0	0	0	0	0	0	0	0	0
censored	1	7	2	0	1	1	0	0	1	0	0	0	0	0	0	0	0	0	0	0		censored	0	1	0	0	0	0	1	0	0	0	0	0	0	0	0	0	0	0	0	0
remaining per bottle	0	1	-2	-1	0	0	0	-1	1	-1	15	15	15	15	15	15	15	15	15	15		remaining per bottle	0	-1	-3	0	0	0	0	1	0	1	15	15	15	15	15	15	15	15	15	15
CONDITION	W1118 RU +						sum deaths		116			censored		8								CONDITION	UAS-InR DN RU -						sum deaths		136			censored		14
	41	42	43	44	45	46	47	48	49	50	51	52	53	54	55	56	57	58	59	60			141	142	143	144	145	146	147	148	149	150	151	152	153	154	155	156	157	158	159	160
dead	15	14	17	14	13	14	14	15	0	0	0	0	0	0	0	0	0	0	0	0		dead	13	12	9	16	15	15	14	16	13	13	0	0	0	0	0	0	0	0	0	0
censored	0	1	0	1	0	4	2	0	0	0	0	0	0	0	0	0	0	0	0	0		censored	1	2	6	1	0	0	1	1	0	2	0	0	0	0	0	0	0	0	0	0
remaining per bottle	0	0	-2	0	2	-3	-1	0	15	15	15	15	15	15	15	15	15	15	15	15		remaining per bottle	1	1	0	-2	0	0	0	-2	2	0	15	15	15	15	15	15	15	15	15	15
CONDITION	W1118 RU -						sum deaths		126			censored		2								CONDITION	UAS-InR active RU +						sum deaths		137			censored		14
	61	62	63	64	65	66	67	68	69	70	71	72	73	74	75	76	77	78	79	80			161	162	163	164	165	166	167	168	169	170	171	172	173	174	175	176	177	178	179	180
dead	13	11	17	15	21	16	16	17	0	0	0	0	0	0	0	0	0	0	0	0		dead	13	15	10	14	14	15	14	17	11	14	0	0	0	0	0	0	0	0	0	0
censored	0	1	1	0	0	0	0	0	0	0	0	0	0	0	0	0	0	0	0	0		censored	1	0	5	1	1	0	1	0	5	0	0	0	0	0	0	0	0	0	0	0
remaining per bottle	2	3	-3	0	-6	-1	-1	-2	15	15	15	15	15	15	15	15	15	15	15	15		remaining per bottle	1	0	0	0	0	0	0	-2	-1	1	15	15	15	15	15	15	15	15	15	15
CONDITION	UAS-InR DN BL RU +						sum deaths		152			censored		7								CONDITION	UAS-InR active RU -						sum deaths		143			censored		9
	81	82	83	84	85	86	87	88	89	90	91	92	93	94	95	96	97	98	99	100			181	182	183	184	185	186	187	188	189	190	191	192	193	194	195	196	197	198	199	200
dead	15	18	15	14	15	15	15	15	15	15	0	0	0	0	0	0	0	0	0	0		dead	14	17	16	14	13	11	16	16	11	14	1	0	0	0	0	0	0	0	0	0
censored	0	0	0	1	1	1	0	2	2	0	0	0	0	0	0	0	0	0	0	0		censored	1	0	1	1	2	1	1	1	0	1	0	0	0	0	0	0	0	0	0	0
remaining per bottle	0	-3	0	0	-1	-1	0	-2	-2	0	15	15	15	15	15	15	15	15	15	15		remaining per bottle	0	-2	-2	0	0	3	-2	-2	4	0	14	15	15	15	15	15	15	15	15	15

## Sheet: sheet(1)
EXPERIMENT	(G4C2)36 and InR signaling
DAY	1
DATE	2017-10-04						time		1899-12-31 12:00:00
CONDITION	UAS-InR RU +						sum deaths		0			censored		1								CONDITION	UAS-InR DN BL RU -						sum deaths		0			censored		2
	1	2	3	4	5	6	7	8	9	10	11	12	13	14	15	16	17	18	19	20			101	102	103	104	105	106	107	108	109	110	111	112	113	114	115	116	117	118	119	120
dead																						dead
carried over																						carried over
censored								1														censored									2
CONDITION	UAS-InR RU -						sum deaths		0			censored		1								CONDITION	UAS-InR DN RU +						sum deaths		0			censored		1
	21	22	23	24	25	26	27	28	29	30	31	32	33	34	35	36	37	38	39	40			121	122	123	124	125	126	127	128	129	130	131	132	133	134	135	136	137	138	139	140
dead																						dead
carried over																						carried over
censored			1																			censored		1
CONDITION	W1118 RU +						sum deaths		0			censored		1								CONDITION	UAS-InR DN RU -						sum deaths		0			censored		2
	41	42	43	44	45	46	47	48	49	50	51	52	53	54	55	56	57	58	59	60			141	142	143	144	145	146	147	148	149	150	151	152	153	154	155	156	157	158	159	160
dead																						dead
carried over																						carried over
censored				1																		censored	1									1
CONDITION	W1118 RU -						sum deaths		0			censored		0								CONDITION	UAS-InR active RU +						sum deaths		0			censored		1
	61	62	63	64	65	66	67	68	69	70	71	72	73	74	75	76	77	78	79	80			161	162	163	164	165	166	167	168	169	170	171	172	173	174	175	176	177	178	179	180
dead																						dead
carried over																						carried over
censored																						censored				1
CONDITION	UAS-InR DN BL RU +						sum deaths		0			censored		0								CONDITION	UAS-InR active RU -						sum deaths		0			censored		0
	81	82	83	84	85	86	87	88	89	90	91	92	93	94	95	96	97	98	99	100			181	182	183	184	185	186	187	188	189	190	191	192	193	194	195	196	197	198	199	200
dead																						dead
carried over																						carried over
censored																						censored

[truncated: 74 more sheets: sheet(2), sheet(3), sheet(4), sheet(5), sheet(6), sheet(7), sheet(8), sheet(9), sheet(10), sheet(11), sheet(12), sheet(13), sheet (14), sheet (15), sheet (16), sheet (17), sheet (18), sheet (19), sheet (20), sheet (21) …]
