# Supplementary material for: Enhanced insulin signalling ameliorates C9orf72 hexanucleotide repeat expansion toxicity in Drosophila
Source: eLife journal article supplement (doi:10.7554/elife.58565), 2021-03-19
Supplement: supp [file elife-58565-supp-v1.zip › elife_poa_e58565_Figure_2_source_data_2.xls]

## Sheet: summary
experiment	ELAVGS control targets			start	2018-01-29
notes				day	date	day	date	day	date	day	date
				1	2018-01-30	26	2018-02-24	51	2018-03-21	76	2018-04-15
				2	2018-01-31	27	2018-02-25	52	2018-03-22	77	2018-04-16
				3	2018-02-01	28	2018-02-26	53	2018-03-23	78	2018-04-17
				4	2018-02-02	29	2018-02-27	54	2018-03-24	79	2018-04-18
				5	2018-02-03	30	2018-02-28	55	2018-03-25	80	2018-04-19
				6	2018-02-04	31	2018-03-01	56	2018-03-26	81	2018-04-20
				7	2018-02-05	32	2018-03-02	57	2018-03-27	82	2018-04-21
				8	2018-02-06	33	2018-03-03	58	2018-03-28	83	2018-04-22
				9	2018-02-07	34	2018-03-04	59	2018-03-29	84	2018-04-23
				10	2018-02-08	35	2018-03-05	60	2018-03-30	85	2018-04-24
				11	2018-02-09	36	2018-03-06	61	2018-03-31	86	2018-04-25
				12	2018-02-10	37	2018-03-07	62	2018-04-01	87	2018-04-26
				13	2018-02-11	38	2018-03-08	63	2018-04-02	88	2018-04-27
				14	2018-02-12	39	2018-03-09	64	2018-04-03	89	2018-04-28
				15	2018-02-13	40	2018-03-10	65	2018-04-04	90	2018-04-29
				16	2018-02-14	41	2018-03-11	66	2018-04-05	91	2018-04-30
				17	2018-02-15	42	2018-03-12	67	2018-04-06	92	2018-05-01
				18	2018-02-16	43	2018-03-13	68	2018-04-07	93	2018-05-02
				19	2018-02-17	44	2018-03-14	69	2018-04-08	94	2018-05-03
				20	2018-02-18	45	2018-03-15	70	2018-04-09	95	2018-05-04
				21	2018-02-19	46	2018-03-16	71	2018-04-10	96	2018-05-05
				22	2018-02-20	47	2018-03-17	72	2018-04-11	97	2018-05-06
				23	2018-02-21	48	2018-03-18	73	2018-04-12	98	2018-05-07
				24	2018-02-22	49	2018-03-19	74	2018-04-13	99	2018-05-08
				25	2018-02-23	50	2018-03-20	75	2018-04-14	100	2018-05-09
	1	2	3	4	5	6	7	8	9	10
condition	UASInRDN RU-	UASINR DN RU+	UAS INR Active RU -	UAS INR Active RU+	UAS INR RU-	UAS INR RU+	W1118 RU-	W1118 RU+	UAS Odd RU-	UAS Odd RU+
container	vials	vials	vials	vials	vials	vials	vials	vials	vials	vials
flies per container	15	15	15	15	15	15	15	15	15	15
# containers	10	10	8	10	10	10	7	7	10	10
calculated start #	150	150	120	150	150	150	105	105	150	150
total deaths	144	143	110	131	134	122	100	90	147	150
total censors	6	4	9	14	18	25	7	14	4	3
actual start #	150	147	119	145	152	147	107	104	151	153
condition	UASInRDN RU-	UASINR DN RU+	UAS INR Active RU -	UAS INR Active RU+	UAS INR RU-	UAS INR RU+	W1118 RU-	W1118 RU+	UAS Odd RU-	UAS Odd RU+	condition
gender	female	female	female	female	female	female	female	female	female	female	gender
mating status	mated 48h	mated 48h	mated 48h	mated 48h	mated 48h	mated 48h	mated 48h	mated 48h	mated 48h	mated 48h	mating status
Wolbachia infected	Yes	Yes	Yes	Yes	Yes	Yes	Yes	Yes	Yes	Yes	Wolbachia infected
temperature	25 C	25 C	25 C	25 C	25 C	25 C	25 C	25 C	25 C	25 C	temperature
base food	1 SY	1 SY	1 SY	1 SY	1 SY	1 SY	1 SY	1 SY	1 SY	1 SY	base food
yeast batch											yeast batch
food addition											food addition
other envir. descriptor 1											other envir. descriptor 1
other envir. descriptor 2											other envir. descriptor 2
other envir. descriptor 3											other envir. descriptor 3
background / strain	w1118	W1118	W1118	W1118	W1118	W1118	W1118	W1118	W1118	W1118	background / strain
genetic alteration 1											genetic alteration 1
genetic alteration 2											genetic alteration 2
genetic alteration 3											genetic alteration 3

## Sheet: stats
ELAVGS control targets				note: values will only be accurate at the end of the experiment
chi-squared values
		UASInRDN RU-	UASINR DN RU+	UAS INR Active RU -	UAS INR Active RU+	UAS INR RU-	UAS INR RU+	W1118 RU-	W1118 RU+	UAS Odd RU-	UAS Odd RU+
	UASInRDN RU-		0.506815	60.5164	66.619	69.8513	5.45265	51.0397	5.27785	0.526775	4.77896
	UASINR DN RU+			73.8162	80.4984	86.7138	9.18328	52.3622	8.48942	0.00971714	7.93354
	UAS INR Active RU -				0.160331	0.798495	20.4295	0.140968	18.6025	67.1332	22.378
	UAS INR Active RU+					0.346315	23.9916	0.00554351	22.061	74.029	26.796
	UAS INR RU-						27.348	0.249967	24.2336	78.3893	31.0747
	UAS INR RU+							16.4563	0.00101001	8.86063	0.0428449
	W1118 RU-								14.4036	53.1877	18.9332
	W1118 RU+									8.06024	0.055872
	UAS Odd RU-										7.2465
	UAS Odd RU+
chi-squared p-value for log-rank test on survivorship data
		UASInRDN RU-	UASINR DN RU+	UAS INR Active RU -	UAS INR Active RU+	UAS INR RU-	UAS INR RU+	W1118 RU-	W1118 RU+	UAS Odd RU-	UAS Odd RU+
	median (d)	82.5	87	75.5	75.5	71	82.5	73	80	85	82.5
	mean (d)	83.6455	84.5488	75.3529	74.2376	72.0764	75.6501	73.0018	80.6489	84.6871	79.8571
	maximum (d)	96.5	92	89.5	89.5	87	96.5	92	93	96.5	95
	UASInRDN RU-		0.476521	7.29667e-15	3.29393e-16	6.39493e-17	0.0195386	9.0518e-13	0.0215985	0.467966	0.0288095
	UASINR DN RU+			8.57389e-18	2.90937e-19	1.25418e-20	0.00244237	4.61514e-13	0.00357217	0.921475	0.00485268
	UAS INR Active RU -				0.688852	0.371544	6.18681e-06	0.707321	1.6101e-05	2.53768e-16	2.23921e-06
	UAS INR Active RU+					0.556207	9.67563e-07	0.940649	2.64126e-06	7.69781e-18	2.26102e-07
	UAS INR RU-						1.69941e-07	0.617099	8.53284e-07	8.46113e-19	2.48292e-08
	UAS INR RU+							4.97854e-05	0.974647	0.00291387	0.836018
	W1118 RU-								0.000147521	3.03143e-13	1.35373e-05
	W1118 RU+									0.00452473	0.813144
	UAS Odd RU-										0.00710395
	UAS Odd RU+

## Sheet: cumulative dths per bottle
			deaths
				bottle number
	date	time	day	1	2	3	4	5	6	7	8	9	10	11	12	13	14	15	16	17	18	19	20	21	22	23	24	25	26	27	28	29	30	31	32	33	34	35	36	37	38	39	40	41	42	43	44	45	46
	2018-01-29	1899-12-31 12:00:00		16	14	15	14	15	16	16	14	14	16	0	0	0	0	0	0	0	0	0	0	17	14	11	15	15	14	15	17	15	14	0	0	0	0	0	0	0	0	0	0	13	13	17	16	17	15
1	2018-01-31	1899-12-31 12:00:00	2	0	0	0	0	0	0	0	0	0	0	0	0	0	0	0	0	0	0	0	0	0	0	0	0	0	0	0	0	0	0	0	0	0	0	0	0	0	0	0	0	0	0	0	0	0	0
2	2018-02-02	1899-12-31 12:00:00	4	0	0	0	0	0	0	0	0	0	0	0	0	0	0	0	0	0	0	0	0	0	0	0	0	0	0	0	0	0	0	0	0	0	0	0	0	0	0	0	0	0	0	0	0	0	0
3	2018-02-05	1899-12-31 12:00:00	7	0	0	0	0	0	0	0	0	0	0	0	0	0	0	0	0	0	0	0	0	0	0	0	0	0	0	0	0	0	0	0	0	0	0	0	0	0	0	0	0	0	0	0	0	0	0
4	2018-02-07	1899-12-31 12:00:00	9	0	0	0	0	0	0	0	0	0	0	0	0	0	0	0	0	0	0	0	0	0	0	0	0	0	0	0	0	0	0	0	0	0	0	0	0	0	0	0	0	0	0	0	0	0	0
5	2018-02-09	1899-12-31 12:00:00	11	0	0	0	0	0	0	0	0	0	0	0	0	0	0	0	0	0	0	0	0	0	0	0	0	0	0	0	0	0	0	0	0	0	0	0	0	0	0	0	0	0	0	0	0	0	0
6	2018-02-12	1899-12-31 12:00:00	14	0	0	0	0	0	0	0	0	0	0	0	0	0	0	0	0	0	0	0	0	0	0	0	0	0	0	0	0	0	0	0	0	0	0	0	0	0	0	0	0	0	0	0	0	0	0
7	2018-02-14	1899-12-31 12:00:00	16	0	0	0	0	0	1	0	0	0	0	0	0	0	0	0	0	0	0	0	0	0	0	0	0	0	0	0	0	0	0	0	0	0	0	0	0	0	0	0	0	0	0	0	0	0	0
8	2018-02-16	1899-12-31 12:00:00	18	0	0	0	0	0	0	0	0	0	0	0	0	0	0	0	0	0	0	0	0	0	0	0	0	0	0	0	0	0	0	0	0	0	0	0	0	0	0	0	0	0	0	0	0	0	0
9	2018-02-19	1899-12-31 12:00:00	21	0	0	0	0	0	0	0	0	0	0	0	0	0	0	0	0	0	0	0	0	0	0	0	0	0	0	0	0	0	0	0	0	0	0	0	0	0	0	0	0	0	0	0	0	0	0
10	2018-02-21	1899-12-31 12:00:00	23	0	0	0	0	0	0	0	0	0	0	0	0	0	0	0	0	0	0	0	0	0	0	0	0	0	0	0	0	0	0	0	0	0	0	0	0	0	0	0	0	0	0	0	0	0	0
11	2018-02-23	1899-12-31 12:00:00	25	0	0	0	0	0	0	0	0	0	0	0	0	0	0	0	0	0	0	0	0	0	0	0	0	0	0	0	0	0	0	0	0	0	0	0	0	0	0	0	0	0	0	0	0	0	0
12	2018-02-26	1899-12-31 12:00:00	28	0	0	0	0	0	0	0	0	0	0	0	0	0	0	0	0	0	0	0	0	0	0	0	0	0	0	0	0	0	0	0	0	0	0	0	0	0	0	0	0	0	0	0	0	0	0
13	2018-02-28	1899-12-31 12:00:00	30	0	0	0	0	0	0	0	0	0	0	0	0	0	0	0	0	0	0	0	0	1	0	0	0	0	0	0	0	0	0	0	0	0	0	0	0	0	0	0	0	0	0	0	0	0	0
14	2018-03-02	1899-12-31 12:00:00	32	0	0	0	0	0	0	0	0	0	0	0	0	0	0	0	0	0	0	0	0	0	0	0	0	0	0	0	0	0	0	0	0	0	0	0	0	0	0	0	0	0	0	0	0	0	0
15	2018-03-05	1899-12-31 12:00:00	35	0	0	0	0	0	0	0	0	0	0	0	0	0	0	0	0	0	0	0	0	0	0	0	0	1	0	0	0	0	0	0	0	0	0	0	0	0	0	0	0	0	0	0	0	0	0
16	2018-03-07	1899-12-31 12:00:00	37	0	0	0	0	0	0	0	0	0	0	0	0	0	0	0	0	0	0	0	0	0	0	0	0	0	0	0	0	0	0	0	0	0	0	0	0	0	0	0	0	0	0	0	0	0	0
17	2018-03-09	1899-12-31 12:00:00	39	0	0	0	0	0	0	0	0	0	0	0	0	0	0	0	0	0	0	0	0	0	0	0	0	0	0	0	0	1	0	0	0	0	0	0	0	0	0	0	0	0	0	0	0	0	0
18	2018-03-12	1899-12-31 12:00:00	42	0	0	0	0	0	0	0	0	0	0	0	0	0	0	0	0	0	0	0	0	1	0	0	0	0	0	0	0	0	0	0	0	0	0	0	0	0	0	0	0	0	0	0	0	0	0
19	2018-03-14	1899-12-31 12:00:00	44	0	0	0	0	0	0	0	0	0	0	0	0	0	0	0	0	0	0	0	0	0	0	0	0	0	0	0	0	0	0	0	0	0	0	0	0	0	0	0	0	0	0	0	0	0	0
20	2018-03-16	1899-12-31 12:00:00	46	0	0	0	0	0	0	0	0	0	0	0	0	0	0	0	0	0	0	0	0	0	0	0	0	0	0	0	0	0	0	0	0	0	0	0	0	0	0	0	0	0	0	0	0	0	0
21	2018-03-19	1899-12-31 12:00:00	49	0	0	0	0	0	0	0	0	0	0	0	0	0	0	0	0	0	0	0	0	0	0	0	0	0	0	0	0	0	0	0	0	0	0	0	0	0	0	0	0	0	0	0	0	0	0
22	2018-03-21	1899-12-31 12:00:00	51	0	0	0	0	0	0	0	0	0	0	0	0	0	0	0	0	0	0	0	0	0	0	0	0	0	0	0	1	0	0	0	0	0	0	0	0	0	0	0	0	0	0	0	0	0	0
23	2018-03-23	1899-12-31 12:00:00	53	0	0	0	0	0	0	0	0	0	0	0	0	0	0	0	0	0	0	0	0	0	0	0	0	0	0	0	0	0	0	0	0	0	0	0	0	0	0	0	0	0	0	0	0	0	0
24	2018-03-26	1899-12-31 12:00:00	56	0	0	0	0	0	0	0	0	0	0	0	0	0	0	0	0	0	0	0	0	0	0	0	0	0	0	0	0	0	0	0	0	0	0	0	0	0	0	0	0	0	0	0	0	0	0
25	2018-03-28	1899-12-31 12:00:00	58	0	0	0	0	0	0	0	0	0	0	0	0	0	0	0	0	0	0	0	0	0	0	0	0	0	0	0	1	0	0	0	0	0	0	0	0	0	0	0	0	0	0	0	0	0	0
26	2018-03-30	1899-12-31 12:00:00	60	0	0	0	0	0	0	0	0	0	0	0	0	0	0	0	0	0	0	0	0	0	0	0	0	0	0	0	0	0	0	0	0	0	0	0	0	0	0	0	0	0	0	0	0	0	1
27	2018-04-02	1899-12-31 12:00:00	63	0	0	1	0	0	0	0	0	0	0	0	0	0	0	0	0	0	0	0	0	0	0	0	0	0	0	1	0	0	0	0	0	0	0	0	0	0	0	0	0	3	1	4	2	4	0
28	2018-04-04	1899-12-31 12:00:00	65	0	0	0	0	0	2	0	0	0	1	0	0	0	0	0	0	0	0	0	0	1	0	0	0	0	0	0	0	0	1	0	0	0	0	0	0	0	0	0	0	0	0	1	0	0	1
29	2018-04-06	1899-12-31 12:00:00	67	1	0	0	0	0	0	0	0	0	0	0	0	0	0	0	0	0	0	0	0	0	1	0	1	0	0	0	0	0	0	0	0	0	0	0	0	0	0	0	0	0	0	0	0	0	0
30	2018-04-09	1899-12-31 12:00:00	70	0	0	0	0	1	2	0	0	0	0	0	0	0	0	0	0	0	0	0	0	1	0	0	0	0	0	0	0	1	0	0	0	0	0	0	0	0	0	0	0	2	0	2	3	0	1
31	2018-04-11	1899-12-31 12:00:00	72	0	0	1	0	0	0	0	1	3	0	0	0	0	0	0	0	0	0	0	0	0	0	0	1	1	1	0	0	0	0	0	0	0	0	0	0	0	0	0	0	1	0	2	2	0	0
32	2018-04-13	1899-12-31 12:00:00	74	0	0	0	0	0	0	0	0	1	0	0	0	0	0	0	0	0	0	0	0	0	1	0	0	0	0	1	0	2	0	0	0	0	0	0	0	0	0	0	0	1	0	1	0	1	0
33	2018-04-16	1899-12-31 12:00:00	77	2	1	1	0	0	2	4	1	2	4	0	0	0	0	0	0	0	0	0	0	0	1	0	1	0	1	0	1	1	3	0	0	0	0	0	0	0	0	0	0	2	2	3	2	7	8
34	2018-04-18	1899-12-31 12:00:00	79	0	1	1	1	2	3	0	0	0	0	0	0	0	0	0	0	0	0	0	0	0	1	0	2	0	1	0	0	0	1	0	0	0	0	0	0	0	0	0	0	0	0	1	2	0	0
35	2018-04-20	1899-12-31 12:00:00	81	1	1	2	1	0	0	2	2	1	4	0	0	0	0	0	0	0	0	0	0	0	0	1	1	0	1	1	0	1	1	0	0	0	0	0	0	0	0	0	0	2	0	0	0	1	0
36	2018-04-23	1899-12-31 12:00:00	84	2	2	2	3	1	2	4	3	3	3	0	0	0	0	0	0	0	0	0	0	1	2	2	2	2	1	3	1	1	0	0	0	0	0	0	0	0	0	0	0	2	3	0	4	1	1
37	2018-04-25	1899-12-31 12:00:00	86	0	1	1	2	1	0	2	0	1	1	0	0	0	0	0	0	0	0	0	0	2	1	1	1	1	4	1	4	2	0	0	0	0	0	0	0	0	0	0	0	0	3	0	0	0	0
38	2018-04-27	1899-12-31 12:00:00	88	4	3	1	1	3	0	1	1	1	0	0	0	0	0	0	0	0	0	0	0	1	1	0	0	4	2	2	4	0	4	0	0	0	0	0	0	0	0	0	0	0	0	0	0	0	0
39	2018-04-30	1899-12-31 12:00:00	91	2	2	2	2	0	1	1	1	0	0	0	0	0	0	0	0	0	0	0	0	1	1	4	4	2	1	0	1	3	2	0	0	0	0	0	0	0	0	0	0	0	2	1	0	1	1
40	2018-05-02	1899-12-31 12:00:00	93	0	1	1	2	2	0	0	1	1	1	0	0	0	0	0	0	0	0	0	0	3	1	2	1	2	2	5	2	2	2	0	0	0	0	0	0	0	0	0	0	0	0	0	0	0	0
41	2018-05-04	1899-12-31 12:00:00	95	2	1	1	1	1	2	0	2	0	0	0	0	0	0	0	0	0	0	0	0	3	1	0	0	0	0	1	0	0	0	0	0	0	0	0	0	0	0	0	0	0	0	0	0	0	0
42	2018-05-07	1899-12-31 12:00:00	98	2	1	0	1	1	1	1	2	1	1	0	0	0	0	0	0	0	0	0	0	1	3	1	0	0	0	0	1	1	0	0	0	0	0	0	0	0	0	0	0	0	0	0	0	0	0
43	2018-05-09	1899-12-31 12:00:00	100	0	0	0	0	0	0	0	0	0	0	0	0	0	0	0	0	0	0	0	0	0	0	0	1	0	0	0	0	0	0	0	0	0	0	0	0	0	0	0	0	0	0	0	0	0	1
44	2018-05-11	1899-12-31 12:00:00	102	0	0	0	0	0	0	0	0	0	0	0	0	0	0	0	0	0	0	0	0	0	0	0	0	0	0	0	0	0	0	0	0	0	0	0	0	0	0	0	0	0	0	0	0	0	0
45	2018-05-14	1899-12-31 12:00:00	105	0	0	0	0	0	0	0	0	0	0	0	0	0	0	0	0	0	0	0	0	0	0	0	0	0	0	0	0	0	0	0	0	0	0	0	0	0	0	0	0	0	0	0	0	0	0
46	2000-01-01	1899-12-31 12:00:00	105	0	0	0	0	0	0	0	0	0	0	0	0	0	0	0	0	0	0	0	0	0	0	0	0	0	0	0	0	0	0	0	0	0	0	0	0	0	0	0	0	0	0	0	0	0	0
47	2000-01-01	1899-12-31 12:00:00	105	0	0	0	0	0	0	0	0	0	0	0	0	0	0	0	0	0	0	0	0	0	0	0	0	0	0	0	0	0	0	0	0	0	0	0	0	0	0	0	0	0	0	0	0	0	0
48	2000-01-01	1899-12-31 12:00:00	105	0	0	0	0	0	0	0	0	0	0	0	0	0	0	0	0	0	0	0	0	0	0	0	0	0	0	0	0	0	0	0	0	0	0	0	0	0	0	0	0	0	0	0	0	0	0
49	2000-01-01	1899-12-31 12:00:00	105	0	0	0	0	0	0	0	0	0	0	0	0	0	0	0	0	0	0	0	0	0	0	0	0	0	0	0	0	0	0	0	0	0	0	0	0	0	0	0	0	0	0	0	0	0	0
50	2000-01-01	1899-12-31 12:00:00	105	0	0	0	0	0	0	0	0	0	0	0	0	0	0	0	0	0	0	0	0	0	0	0	0	0	0	0	0	0	0	0	0	0	0	0	0	0	0	0	0	0	0	0	0	0	0
51	2000-01-01	1899-12-31 12:00:00	105	0	0	0	0	0	0	0	0	0	0	0	0	0	0	0	0	0	0	0	0	0	0	0	0	0	0	0	0	0	0	0	0	0	0	0	0	0	0	0	0	0	0	0	0	0	0
52	2000-01-01	1899-12-31 12:00:00	105	0	0	0	0	0	0	0	0	0	0	0	0	0	0	0	0	0	0	0	0	0	0	0	0	0	0	0	0	0	0	0	0	0	0	0	0	0	0	0	0	0	0	0	0	0	0
53	2000-01-01	1899-12-31 12:00:00	105	0	0	0	0	0	0	0	0	0	0	0	0	0	0	0	0	0	0	0	0	0	0	0	0	0	0	0	0	0	0	0	0	0	0	0	0	0	0	0	0	0	0	0	0	0	0
54	2000-01-01	1899-12-31 12:00:00	105	0	0	0	0	0	0	0	0	0	0	0	0	0	0	0	0	0	0	0	0	0	0	0	0	0	0	0	0	0	0	0	0	0	0	0	0	0	0	0	0	0	0	0	0	0	0
55	2000-01-01	1899-12-31 12:00:00	105	0	0	0	0	0	0	0	0	0	0	0	0	0	0	0	0	0	0	0	0	0	0	0	0	0	0	0	0	0	0	0	0	0	0	0	0	0	0	0	0	0	0	0	0	0	0
56	2000-01-01	1899-12-31 12:00:00	105	0	0	0	0	0	0	0	0	0	0	0	0	0	0	0	0	0	0	0	0	0	0	0	0	0	0	0	0	0	0	0	0	0	0	0	0	0	0	0	0	0	0	0	0	0	0
57	2000-01-01	1899-12-31 12:00:00	105	0	0	0	0	0	0	0	0	0	0	0	0	0	0	0	0	0	0	0	0	0	0	0	0	0	0	0	0	0	0	0	0	0	0	0	0	0	0	0	0	0	0	0	0	0	0
58	2000-01-01	1899-12-31 12:00:00	105	0	0	0	0	0	0	0	0	0	0	0	0	0	0	0	0	0	0	0	0	0	0	0	0	0	0	0	0	0	0	0	0	0	0	0	0	0	0	0	0	0	0	0	0	0	0
59	2000-01-01	1899-12-31 12:00:00	105	0	0	0	0	0	0	0	0	0	0	0	0	0	0	0	0	0	0	0	0	0	0	0	0	0	0	0	0	0	0	0	0	0	0	0	0	0	0	0	0	0	0	0	0	0	0
60	2000-01-01	1899-12-31 12:00:00	105	0	0	0	0	0	0	0	0	0	0	0	0	0	0	0	0	0	0	0	0	0	0	0	0	0	0	0	0	0	0	0	0	0	0	0	0	0	0	0	0	0	0	0	0	0	0
61	2000-01-01	1899-12-31 12:00:00	105	0	0	0	0	0	0	0	0	0	0	0	0	0	0	0	0	0	0	0	0	0	0	0	0	0	0	0	0	0	0	0	0	0	0	0	0	0	0	0	0	0	0	0	0	0	0
62	2000-01-01	1899-12-31 12:00:00	105	0	0	0	0	0	0	0	0	0	0	0	0	0	0	0	0	0	0	0	0	0	0	0	0	0	0	0	0	0	0	0	0	0	0	0	0	0	0	0	0	0	0	0	0	0	0
63	2000-01-01	1899-12-31 12:00:00	105	0	0	0	0	0	0	0	0	0	0	0	0	0	0	0	0	0	0	0	0	0	0	0	0	0	0	0	0	0	0	0	0	0	0	0	0	0	0	0	0	0	0	0	0	0	0
64	2000-01-01	1899-12-31 12:00:00	105	0	0	0	0	0	0	0	0	0	0	0	0	0	0	0	0	0	0	0	0	0	0	0	0	0	0	0	0	0	0	0	0	0	0	0	0	0	0	0	0	0	0	0	0	0	0
65	2000-01-01	1899-12-31 12:00:00	105	0	0	0	0	0	0	0	0	0	0	0	0	0	0	0	0	0	0	0	0	0	0	0	0	0	0	0	0	0	0	0	0	0	0	0	0	0	0	0	0	0	0	0	0	0	0
66	2000-01-01	1899-12-31 12:00:00	105	0	0	0	0	0	0	0	0	0	0	0	0	0	0	0	0	0	0	0	0	0	0	0	0	0	0	0	0	0	0	0	0	0	0	0	0	0	0	0	0	0	0	0	0	0	0
67	2000-01-01	1899-12-31 12:00:00	105	0	0	0	0	0	0	0	0	0	0	0	0	0	0	0	0	0	0	0	0	0	0	0	0	0	0	0	0	0	0	0	0	0	0	0	0	0	0	0	0	0	0	0	0	0	0
68	2000-01-01	1899-12-31 12:00:00	105	0	0	0	0	0	0	0	0	0	0	0	0	0	0	0	0	0	0	0	0	0	0	0	0	0	0	0	0	0	0	0	0	0	0	0	0	0	0	0	0	0	0	0	0	0	0
69	2000-01-01	1899-12-31 12:00:00	105	0	0	0	0	0	0	0	0	0	0	0	0	0	0	0	0	0	0	0	0	0	0	0	0	0	0	0	0	0	0	0	0	0	0	0	0	0	0	0	0	0	0	0	0	0	0
70	2000-01-01	1899-12-31 12:00:00	105	0	0	0	0	0	0	0	0	0	0	0	0	0	0	0	0	0	0	0	0	0	0	0	0	0	0	0	0	0	0	0	0	0	0	0	0	0	0	0	0	0	0	0	0	0	0
71	2000-01-01	1899-12-31 12:00:00	105	0	0	0	0	0	0	0	0	0	0	0	0	0	0	0	0	0	0	0	0	0	0	0	0	0	0	0	0	0	0	0	0	0	0	0	0	0	0	0	0	0	0	0	0	0	0
72	2000-01-01	1899-12-31 12:00:00	105	0	0	0	0	0	0	0	0	0	0	0	0	0	0	0	0	0	0	0	0	0	0	0	0	0	0	0	0	0	0	0	0	0	0	0	0	0	0	0	0	0	0	0	0	0	0
73	2000-01-01	1899-12-31 12:00:00	105	0	0	0	0	0	0	0	0	0	0	0	0	0	0	0	0	0	0	0	0	0	0	0	0	0	0	0	0	0	0	0	0	0	0	0	0	0	0	0	0	0	0	0	0	0	0
74	2000-01-01	1899-12-31 12:00:00	105	0	0	0	0	0	0	0	0	0	0	0	0	0	0	0	0	0	0	0	0	0	0	0	0	0	0	0	0	0	0	0	0	0	0	0	0	0	0	0	0	0	0	0	0	0	0
75	2000-01-01	1899-12-31 12:00:00	105	0	0	0	0	0	0	0	0	0	0	0	0	0	0	0	0	0	0	0	0	0	0	0	0	0	0	0	0	0	0	0	0	0	0	0	0	0	0	0	0	0	0	0	0	0	0
				16	14	14	14	12	16	15	14	14	15	0	0	0	0	0	0	0	0	0	0	16	14	11	15	13	14	15	16	15	14	0	0	0	0	0	0	0	0	0	0	13	11	15	15	15	14
		censors
				1	2	3	4	5	6	7	8	9	10	11	12	13	14	15	16	17	18	19	20	21	22	23	24	25	26	27	28	29	30	31	32	33	34	35	36	37	38	39	40	41	42	43	44	45	46
1	2018-01-31	1899-12-31 12:00:00	2	0	0	0	0	0	0	0	0	0	0	0	0	0	0	0	0	0	0	0	0	0	0	0	0	1	0	0	0	0	0	0	0	0	0	0	0	0	0	0	0	0	0	0	0	0	0
2	2018-02-02	1899-12-31 12:00:00	4	0	0	0	0	0	0	0	0	0	0	0	0	0	0	0	0	0	0	0	0	0	0	0	0	0	0	0	0	0	0	0	0	0	0	0	0	0	0	0	0	0	0	0	0	0	0
3	2018-02-05	1899-12-31 12:00:00	7	0	0	0	0	0	0	0	0	0	0	0	0	0	0	0	0	0	0	0	0	0	0	0	0	0	0	0	0	0	0	0	0	0	0	0	0	0	0	0	0	0	0	0	0	0	0
4	2018-02-07	1899-12-31 12:00:00	9	0	0	0	0	0	0	0	0	0	0	0	0	0	0	0	0	0	0	0	0	0	0	0	0	0	0	0	0	0	0	0	0	0	0	0	0	0	0	0	0	0	2	1	0	0	1
5	2018-02-09	1899-12-31 12:00:00	11	0	0	0	0	0	0	0	0	0	0	0	0	0	0	0	0	0	0	0	0	0	0	0	0	0	0	0	0	0	0	0	0	0	0	0	0	0	0	0	0	0	0	0	0	0	0
6	2018-02-12	1899-12-31 12:00:00	14	0	0	0	0	0	0	0	0	0	0	0	0	0	0	0	0	0	0	0	0	0	0	0	0	0	0	0	0	0	0	0	0	0	0	0	0	0	0	0	0	0	0	0	0	0	0
7	2018-02-14	1899-12-31 12:00:00	16	0	0	0	0	0	0	0	0	0	0	0	0	0	0	0	0	0	0	0	0	0	0	0	0	0	0	0	0	0	0	0	0	0	0	0	0	0	0	0	0	0	0	0	0	0	0
8	2018-02-16	1899-12-31 12:00:00	18	0	0	0	0	0	0	0	0	0	0	0	0	0	0	0	0	0	0	0	0	0	0	0	0	0	0	0	0	0	0	0	0	0	0	0	0	0	0	0	0	0	0	0	0	0	0
9	2018-02-19	1899-12-31 12:00:00	21	0	0	0	0	0	0	0	0	0	0	0	0	0	0	0	0	0	0	0	0	0	0	0	0	0	0	0	0	0	0	0	0	0	0	0	0	0	0	0	0	0	0	0	0	0	0
10	2018-02-21	1899-12-31 12:00:00	23	0	0	0	0	0	0	0	0	0	0	0	0	0	0	0	0	0	0	0	0	0	0	0	0	0	0	0	0	0	0	0	0	0	0	0	0	0	0	0	0	0	0	0	0	0	0
11	2018-02-23	1899-12-31 12:00:00	25	0	0	0	0	0	0	0	0	0	0	0	0	0	0	0	0	0	0	0	0	0	0	0	0	0	0	0	0	0	0	0	0	0	0	0	0	0	0	0	0	0	0	0	0	0	0
12	2018-02-26	1899-12-31 12:00:00	28	0	0	0	0	0	0	0	0	0	0	0	0	0	0	0	0	0	0	0	0	0	0	0	0	0	0	0	0	0	0	0	0	0	0	0	0	0	0	0	0	0	0	0	0	0	0
13	2018-02-28	1899-12-31 12:00:00	30	0	0	0	0	3	0	0	0	0	0	0	0	0	0	0	0	0	0	0	0	0	0	0	0	0	0	0	0	0	0	0	0	0	0	0	0	0	0	0	0	0	0	0	0	0	0
14	2018-03-02	1899-12-31 12:00:00	32	0	0	0	0	0	0	0	0	0	0	0	0	0	0	0	0	0	0	0	0	0	0	0	0	0	0	0	0	0	0	0	0	0	0	0	0	0	0	0	0	0	0	0	0	0	0
15	2018-03-05	1899-12-31 12:00:00	35	0	0	0	0	0	0	0	0	0	0	0	0	0	0	0	0	0	0	0	0	0	0	0	0	0	0	0	0	0	0	0	0	0	0	0	0	0	0	0	0	0	0	0	0	0	0
16	2018-03-07	1899-12-31 12:00:00	37	0	0	0	0	0	0	0	0	0	0	0	0	0	0	0	0	0	0	0	0	0	0	0	0	0	0	0	0	0	0	0	0	0	0	0	0	0	0	0	0	0	0	0	0	0	0
17	2018-03-09	1899-12-31 12:00:00	39	0	0	0	0	0	0	0	0	0	0	0	0	0	0	0	0	0	0	0	0	0	0	0	0	0	0	0	0	0	0	0	0	0	0	0	0	0	0	0	0	0	0	0	0	0	0
18	2018-03-12	1899-12-31 12:00:00	42	0	0	0	0	0	0	0	0	0	0	0	0	0	0	0	0	0	0	0	0	0	0	0	0	0	0	0	0	0	0	0	0	0	0	0	0	0	0	0	0	0	0	0	0	0	0
19	2018-03-14	1899-12-31 12:00:00	44	0	0	0	0	0	0	0	0	0	0	0	0	0	0	0	0	0	0	0	0	0	0	0	0	0	0	0	0	0	0	0	0	0	0	0	0	0	0	0	0	0	0	0	0	0	0
20	2018-03-16	1899-12-31 12:00:00	46	0	0	0	0	0	0	0	0	0	0	0	0	0	0	0	0	0	0	0	0	0	0	0	0	0	0	0	0	0	0	0	0	0	0	0	0	0	0	0	0	0	0	0	0	0	0
21	2018-03-19	1899-12-31 12:00:00	49	0	0	0	0	0	0	0	0	0	0	0	0	0	0	0	0	0	0	0	0	0	0	0	0	0	0	0	0	0	0	0	0	0	0	0	0	0	0	0	0	0	0	1	1	0	0
22	2018-03-21	1899-12-31 12:00:00	51	0	0	0	0	0	0	0	0	0	0	0	0	0	0	0	0	0	0	0	0	0	0	0	0	0	0	0	0	0	0	0	0	0	0	0	0	0	0	0	0	0	0	0	0	0	0
23	2018-03-23	1899-12-31 12:00:00	53	0	0	0	0	0	0	0	0	0	0	0	0	0	0	0	0	0	0	0	0	0	0	0	0	0	0	0	0	0	0	0	0	0	0	0	0	0	0	0	0	0	0	0	0	0	0
24	2018-03-26	1899-12-31 12:00:00	56	0	0	0	0	0	0	0	0	0	0	0	0	0	0	0	0	0	0	0	0	0	0	0	0	0	0	0	0	0	0	0	0	0	0	0	0	0	0	0	0	0	0	0	0	0	0
25	2018-03-28	1899-12-31 12:00:00	58	0	0	0	0	0	0	0	0	0	0	0	0	0	0	0	0	0	0	0	0	0	0	0	0	0	0	0	1	0	0	0	0	0	0	0	0	0	0	0	0	0	0	0	0	0	0
26	2018-03-30	1899-12-31 12:00:00	60	0	0	0	0	0	0	0	0	0	0	0	0	0	0	0	0	0	0	0	0	0	0	0	0	0	0	0	0	0	0	0	0	0	0	0	0	0	0	0	0	0	0	0	0	0	0
27	2018-04-02	1899-12-31 12:00:00	63	0	0	0	0	0	0	0	0	0	0	0	0	0	0	0	0	0	0	0	0	0	0	0	0	1	0	0	0	0	0	0	0	0	0	0	0	0	0	0	0	0	0	0	0	2	0
28	2018-04-04	1899-12-31 12:00:00	65	0	0	0	0	0	0	0	0	0	0	0	0	0	0	0	0	0	0	0	0	0	0	0	0	0	0	0	0	0	0	0	0	0	0	0	0	0	0	0	0	0	0	0	0	0	0
29	2018-04-06	1899-12-31 12:00:00	67	0	0	0	0	0	0	0	0	0	0	0	0	0	0	0	0	0	0	0	0	0	0	0	0	0	0	0	0	0	0	0	0	0	0	0	0	0	0	0	0	0	0	0	0	0	0
30	2018-04-09	1899-12-31 12:00:00	70	0	0	0	0	0	0	0	0	0	0	0	0	0	0	0	0	0	0	0	0	0	0	0	0	0	0	0	0	0	0	0	0	0	0	0	0	0	0	0	0	0	0	0	0	0	0
31	2018-04-11	1899-12-31 12:00:00	72	0	0	0	0	0	0	0	0	0	0	0	0	0	0	0	0	0	0	0	0	0	0	0	0	0	0	0	0	0	0	0	0	0	0	0	0	0	0	0	0	0	0	0	0	0	0
32	2018-04-13	1899-12-31 12:00:00	74	0	0	0	0	0	0	0	0	0	0	0	0	0	0	0	0	0	0	0	0	0	0	0	0	0	0	0	0	0	0	0	0	0	0	0	0	0	0	0	0	0	0	0	0	0	0
33	2018-04-16	1899-12-31 12:00:00	77	0	0	1	0	0	0	0	0	0	0	0	0	0	0	0	0	0	0	0	0	0	0	0	0	0	0	0	0	0	0	0	0	0	0	0	0	0	0	0	0	0	0	0	0	0	0
34	2018-04-18	1899-12-31 12:00:00	79	0	0	0	0	0	0	1	0	0	0	0	0	0	0	0	0	0	0	0	0	0	0	0	0	0	0	0	0	0	0	0	0	0	0	0	0	0	0	0	0	0	0	0	0	0	0
35	2018-04-20	1899-12-31 12:00:00	81	0	0	0	0	0	0	0	0	0	0	0	0	0	0	0	0	0	0	0	0	0	0	0	0	0	0	0	0	0	0	0	0	0	0	0	0	0	0	0	0	0	0	0	0	0	0
36	2018-04-23	1899-12-31 12:00:00	84	0	0	0	0	0	0	0	0	0	0	0	0	0	0	0	0	0	0	0	0	0	0	0	0	0	0	0	0	0	0	0	0	0	0	0	0	0	0	0	0	0	0	0	0	0	0
37	2018-04-25	1899-12-31 12:00:00	86	0	0	0	0	0	0	0	0	0	0	0	0	0	0	0	0	0	0	0	0	0	0	0	0	0	0	0	0	0	0	0	0	0	0	0	0	0	0	0	0	0	0	0	0	0	0
38	2018-04-27	1899-12-31 12:00:00	88	0	0	0	0	0	0	0	0	0	0	0	0	0	0	0	0	0	0	0	0	0	0	0	0	0	0	0	0	0	0	0	0	0	0	0	0	0	0	0	0	0	0	0	0	0	0
39	2018-04-30	1899-12-31 12:00:00	91	0	0	0	0	0	0	0	0	0	0	0	0	0	0	0	0	0	0	0	0	0	0	0	0	0	0	0	0	0	0	0	0	0	0	0	0	0	0	0	0	0	0	0	0	0	0
40	2018-05-02	1899-12-31 12:00:00	93	0	0	0	0	0	0	0	0	0	0	0	0	0	0	0	0	0	0	0	0	0	0	0	0	0	0	0	0	0	0	0	0	0	0	0	0	0	0	0	0	0	0	0	0	0	0
41	2018-05-04	1899-12-31 12:00:00	95	0	0	0	0	0	0	0	0	0	0	0	0	0	0	0	0	0	0	0	0	1	0	0	0	0	0	0	0	0	0	0	0	0	0	0	0	0	0	0	0	0	0	0	0	0	0
42	2018-05-07	1899-12-31 12:00:00	98	0	0	0	0	0	0	0	0	0	0	0	0	0	0	0	0	0	0	0	0	0	0	0	0	0	0	0	0	0	0	0	0	0	0	0	0	0	0	0	0	0	0	0	0	0	0
43	2018-05-09	1899-12-31 12:00:00	100	0	0	0	0	0	0	0	0	0	1	0	0	0	0	0	0	0	0	0	0	0	0	0	0	0	0	0	0	0	0	0	0	0	0	0	0	0	0	0	0	0	0	0	0	0	0
44	2018-05-11	1899-12-31 12:00:00	102	0	0	0	0	0	0	0	0	0	0	0	0	0	0	0	0	0	0	0	0	0	0	0	0	0	0	0	0	0	0	0	0	0	0	0	0	0	0	0	0	0	0	0	0	0	0
45	2018-05-14	1899-12-31 12:00:00	105	0	0	0	0	0	0	0	0	0	0	0	0	0	0	0	0	0	0	0	0	0	0	0	0	0	0	0	0	0	0	0	0	0	0	0	0	0	0	0	0	0	0	0	0	0	0
46	2000-01-01	1899-12-31 12:00:00	105	0	0	0	0	0	0	0	0	0	0	0	0	0	0	0	0	0	0	0	0	0	0	0	0	0	0	0	0	0	0	0	0	0	0	0	0	0	0	0	0	0	0	0	0	0	0
47	2000-01-01	1899-12-31 12:00:00	105	0	0	0	0	0	0	0	0	0	0	0	0	0	0	0	0	0	0	0	0	0	0	0	0	0	0	0	0	0	0	0	0	0	0	0	0	0	0	0	0	0	0	0	0	0	0
48	2000-01-01	1899-12-31 12:00:00	105	0	0	0	0	0	0	0	0	0	0	0	0	0	0	0	0	0	0	0	0	0	0	0	0	0	0	0	0	0	0	0	0	0	0	0	0	0	0	0	0	0	0	0	0	0	0
49	2000-01-01	1899-12-31 12:00:00	105	0	0	0	0	0	0	0	0	0	0	0	0	0	0	0	0	0	0	0	0	0	0	0	0	0	0	0	0	0	0	0	0	0	0	0	0	0	0	0	0	0	0	0	0	0	0
50	2000-01-01	1899-12-31 12:00:00	105	0	0	0	0	0	0	0	0	0	0	0	0	0	0	0	0	0	0	0	0	0	0	0	0	0	0	0	0	0	0	0	0	0	0	0	0	0	0	0	0	0	0	0	0	0	0
51	2000-01-01	1899-12-31 12:00:00	105	0	0	0	0	0	0	0	0	0	0	0	0	0	0	0	0	0	0	0	0	0	0	0	0	0	0	0	0	0	0	0	0	0	0	0	0	0	0	0	0	0	0	0	0	0	0
52	2000-01-01	1899-12-31 12:00:00	105	0	0	0	0	0	0	0	0	0	0	0	0	0	0	0	0	0	0	0	0	0	0	0	0	0	0	0	0	0	0	0	0	0	0	0	0	0	0	0	0	0	0	0	0	0	0
53	2000-01-01	1899-12-31 12:00:00	105	0	0	0	0	0	0	0	0	0	0	0	0	0	0	0	0	0	0	0	0	0	0	0	0	0	0	0	0	0	0	0	0	0	0	0	0	0	0	0	0	0	0	0	0	0	0
54	2000-01-01	1899-12-31 12:00:00	105	0	0	0	0	0	0	0	0	0	0	0	0	0	0	0	0	0	0	0	0	0	0	0	0	0	0	0	0	0	0	0	0	0	0	0	0	0	0	0	0	0	0	0	0	0	0
55	2000-01-01	1899-12-31 12:00:00	105	0	0	0	0	0	0	0	0	0	0	0	0	0	0	0	0	0	0	0	0	0	0	0	0	0	0	0	0	0	0	0	0	0	0	0	0	0	0	0	0	0	0	0	0	0	0
56	2000-01-01	1899-12-31 12:00:00	105	0	0	0	0	0	0	0	0	0	0	0	0	0	0	0	0	0	0	0	0	0	0	0	0	0	0	0	0	0	0	0	0	0	0	0	0	0	0	0	0	0	0	0	0	0	0
57	2000-01-01	1899-12-31 12:00:00	105	0	0	0	0	0	0	0	0	0	0	0	0	0	0	0	0	0	0	0	0	0	0	0	0	0	0	0	0	0	0	0	0	0	0	0	0	0	0	0	0	0	0	0	0	0	0
58	2000-01-01	1899-12-31 12:00:00	105	0	0	0	0	0	0	0	0	0	0	0	0	0	0	0	0	0	0	0	0	0	0	0	0	0	0	0	0	0	0	0	0	0	0	0	0	0	0	0	0	0	0	0	0	0	0
59	2000-01-01	1899-12-31 12:00:00	105	0	0	0	0	0	0	0	0	0	0	0	0	0	0	0	0	0	0	0	0	0	0	0	0	0	0	0	0	0	0	0	0	0	0	0	0	0	0	0	0	0	0	0	0	0	0
60	2000-01-01	1899-12-31 12:00:00	105	0	0	0	0	0	0	0	0	0	0	0	0	0	0	0	0	0	0	0	0	0	0	0	0	0	0	0	0	0	0	0	0	0	0	0	0	0	0	0	0	0	0	0	0	0	0
61	2000-01-01	1899-12-31 12:00:00	105	0	0	0	0	0	0	0	0	0	0	0	0	0	0	0	0	0	0	0	0	0	0	0	0	0	0	0	0	0	0	0	0	0	0	0	0	0	0	0	0	0	0	0	0	0	0
62	2000-01-01	1899-12-31 12:00:00	105	0	0	0	0	0	0	0	0	0	0	0	0	0	0	0	0	0	0	0	0	0	0	0	0	0	0	0	0	0	0	0	0	0	0	0	0	0	0	0	0	0	0	0	0	0	0
63	2000-01-01	1899-12-31 12:00:00	105	0	0	0	0	0	0	0	0	0	0	0	0	0	0	0	0	0	0	0	0	0	0	0	0	0	0	0	0	0	0	0	0	0	0	0	0	0	0	0	0	0	0	0	0	0	0
64	2000-01-01	1899-12-31 12:00:00	105	0	0	0	0	0	0	0	0	0	0	0	0	0	0	0	0	0	0	0	0	0	0	0	0	0	0	0	0	0	0	0	0	0	0	0	0	0	0	0	0	0	0	0	0	0	0
65	2000-01-01	1899-12-31 12:00:00	105	0	0	0	0	0	0	0	0	0	0	0	0	0	0	0	0	0	0	0	0	0	0	0	0	0	0	0	0	0	0	0	0	0	0	0	0	0	0	0	0	0	0	0	0	0	0
66	2000-01-01	1899-12-31 12:00:00	105	0	0	0	0	0	0	0	0	0	0	0	0	0	0	0	0	0	0	0	0	0	0	0	0	0	0	0	0	0	0	0	0	0	0	0	0	0	0	0	0	0	0	0	0	0	0
67	2000-01-01	1899-12-31 12:00:00	105	0	0	0	0	0	0	0	0	0	0	0	0	0	0	0	0	0	0	0	0	0	0	0	0	0	0	0	0	0	0	0	0	0	0	0	0	0	0	0	0	0	0	0	0	0	0
68	2000-01-01	1899-12-31 12:00:00	105	0	0	0	0	0	0	0	0	0	0	0	0	0	0	0	0	0	0	0	0	0	0	0	0	0	0	0	0	0	0	0	0	0	0	0	0	0	0	0	0	0	0	0	0	0	0
69	2000-01-01	1899-12-31 12:00:00	105	0	0	0	0	0	0	0	0	0	0	0	0	0	0	0	0	0	0	0	0	0	0	0	0	0	0	0	0	0	0	0	0	0	0	0	0	0	0	0	0	0	0	0	0	0	0
70	2000-01-01	1899-12-31 12:00:00	105	0	0	0	0	0	0	0	0	0	0	0	0	0	0	0	0	0	0	0	0	0	0	0	0	0	0	0	0	0	0	0	0	0	0	0	0	0	0	0	0	0	0	0	0	0	0
71	2000-01-01	1899-12-31 12:00:00	105	0	0	0	0	0	0	0	0	0	0	0	0	0	0	0	0	0	0	0	0	0	0	0	0	0	0	0	0	0	0	0	0	0	0	0	0	0	0	0	0	0	0	0	0	0	0
72	2000-01-01	1899-12-31 12:00:00	105	0	0	0	0	0	0	0	0	0	0	0	0	0	0	0	0	0	0	0	0	0	0	0	0	0	0	0	0	0	0	0	0	0	0	0	0	0	0	0	0	0	0	0	0	0	0
73	2000-01-01	1899-12-31 12:00:00	105	0	0	0	0	0	0	0	0	0	0	0	0	0	0	0	0	0	0	0	0	0	0	0	0	0	0	0	0	0	0	0	0	0	0	0	0	0	0	0	0	0	0	0	0	0	0
74	2000-01-01	1899-12-31 12:00:00	105	0	0	0	0	0	0	0	0	0	0	0	0	0	0	0	0	0	0	0	0	0	0	0	0	0	0	0	0	0	0	0	0	0	0	0	0	0	0	0	0	0	0	0	0	0	0
75	2000-01-01	1899-12-31 12:00:00	105	0	0	0	0	0	0	0	0	0	0	0	0	0	0	0	0	0	0	0	0	0	0	0	0	0	0	0	0	0	0	0	0	0	0	0	0	0	0	0	0	0	0	0	0	0	0
				0	0	1	0	3	0	1	0	0	1	0	0	0	0	0	0	0	0	0	0	1	0	0	0	2	0	0	1	0	0	0	0	0	0	0	0	0	0	0	0	0	2	2	1	2	1
[truncated: 154 more columns]

## Sheet: Nx per bottle
			deaths
				bottle number
	date	time	day	1	2	3	4	5	6	7	8	9	10	11	12	13	14	15	16	17	18	19	20	21	22	23	24	25	26	27	28	29	30	31	32	33	34	35	36	37	38	39	40	41	42	43	44	45	46
0	2018-01-29	1899-12-31 12:00:00	0	15	15	15	15	15	15	15	15	15	15	15	15	15	15	15	15	15	15	15	15	15	15	15	15	15	15	15	15	15	15	15	15	15	15	15	15	15	15	15	15	15	15	15	15	15	15
1	2018-01-31	1899-12-31 12:00:00	2	15	15	15	15	15	15	15	15	15	15	15	15	15	15	15	15	15	15	15	15	15	15	15	15	14	15	15	15	15	15	15	15	15	15	15	15	15	15	15	15	15	15	15	15	15	15
2	2018-02-02	1899-12-31 12:00:00	4	15	15	15	15	15	15	15	15	15	15	15	15	15	15	15	15	15	15	15	15	15	15	15	15	14	15	15	15	15	15	15	15	15	15	15	15	15	15	15	15	15	15	15	15	15	15
3	2018-02-05	1899-12-31 12:00:00	7	15	15	15	15	15	15	15	15	15	15	15	15	15	15	15	15	15	15	15	15	15	15	15	15	14	15	15	15	15	15	15	15	15	15	15	15	15	15	15	15	15	15	15	15	15	15
4	2018-02-07	1899-12-31 12:00:00	9	15	15	15	15	15	15	15	15	15	15	15	15	15	15	15	15	15	15	15	15	15	15	15	15	14	15	15	15	15	15	15	15	15	15	15	15	15	15	15	15	15	13	14	15	15	14
5	2018-02-09	1899-12-31 12:00:00	11	15	15	15	15	15	15	15	15	15	15	15	15	15	15	15	15	15	15	15	15	15	15	15	15	14	15	15	15	15	15	15	15	15	15	15	15	15	15	15	15	15	13	14	15	15	14
6	2018-02-12	1899-12-31 12:00:00	14	15	15	15	15	15	15	15	15	15	15	15	15	15	15	15	15	15	15	15	15	15	15	15	15	14	15	15	15	15	15	15	15	15	15	15	15	15	15	15	15	15	13	14	15	15	14
7	2018-02-14	1899-12-31 12:00:00	16	15	15	15	15	15	14	15	15	15	15	15	15	15	15	15	15	15	15	15	15	15	15	15	15	14	15	15	15	15	15	15	15	15	15	15	15	15	15	15	15	15	13	14	15	15	14
8	2018-02-16	1899-12-31 12:00:00	18	15	15	15	15	15	14	15	15	15	15	15	15	15	15	15	15	15	15	15	15	15	15	15	15	14	15	15	15	15	15	15	15	15	15	15	15	15	15	15	15	15	13	14	15	15	14
9	2018-02-19	1899-12-31 12:00:00	21	15	15	15	15	15	14	15	15	15	15	15	15	15	15	15	15	15	15	15	15	15	15	15	15	14	15	15	15	15	15	15	15	15	15	15	15	15	15	15	15	15	13	14	15	15	14
10	2018-02-21	1899-12-31 12:00:00	23	15	15	15	15	15	14	15	15	15	15	15	15	15	15	15	15	15	15	15	15	15	15	15	15	14	15	15	15	15	15	15	15	15	15	15	15	15	15	15	15	15	13	14	15	15	14
11	2018-02-23	1899-12-31 12:00:00	25	15	15	15	15	15	14	15	15	15	15	15	15	15	15	15	15	15	15	15	15	15	15	15	15	14	15	15	15	15	15	15	15	15	15	15	15	15	15	15	15	15	13	14	15	15	14
12	2018-02-26	1899-12-31 12:00:00	28	15	15	15	15	15	14	15	15	15	15	15	15	15	15	15	15	15	15	15	15	15	15	15	15	14	15	15	15	15	15	15	15	15	15	15	15	15	15	15	15	15	13	14	15	15	14
13	2018-02-28	1899-12-31 12:00:00	30	15	15	15	15	12	14	15	15	15	15	15	15	15	15	15	15	15	15	15	15	14	15	15	15	14	15	15	15	15	15	15	15	15	15	15	15	15	15	15	15	15	13	14	15	15	14
14	2018-03-02	1899-12-31 12:00:00	32	15	15	15	15	12	14	15	15	15	15	15	15	15	15	15	15	15	15	15	15	14	15	15	15	14	15	15	15	15	15	15	15	15	15	15	15	15	15	15	15	15	13	14	15	15	14
15	2018-03-05	1899-12-31 12:00:00	35	15	15	15	15	12	14	15	15	15	15	15	15	15	15	15	15	15	15	15	15	14	15	15	15	13	15	15	15	15	15	15	15	15	15	15	15	15	15	15	15	15	13	14	15	15	14
16	2018-03-07	1899-12-31 12:00:00	37	15	15	15	15	12	14	15	15	15	15	15	15	15	15	15	15	15	15	15	15	14	15	15	15	13	15	15	15	15	15	15	15	15	15	15	15	15	15	15	15	15	13	14	15	15	14
17	2018-03-09	1899-12-31 12:00:00	39	15	15	15	15	12	14	15	15	15	15	15	15	15	15	15	15	15	15	15	15	14	15	15	15	13	15	15	15	14	15	15	15	15	15	15	15	15	15	15	15	15	13	14	15	15	14
18	2018-03-12	1899-12-31 12:00:00	42	15	15	15	15	12	14	15	15	15	15	15	15	15	15	15	15	15	15	15	15	13	15	15	15	13	15	15	15	14	15	15	15	15	15	15	15	15	15	15	15	15	13	14	15	15	14
19	2018-03-14	1899-12-31 12:00:00	44	15	15	15	15	12	14	15	15	15	15	15	15	15	15	15	15	15	15	15	15	13	15	15	15	13	15	15	15	14	15	15	15	15	15	15	15	15	15	15	15	15	13	14	15	15	14
20	2018-03-16	1899-12-31 12:00:00	46	15	15	15	15	12	14	15	15	15	15	15	15	15	15	15	15	15	15	15	15	13	15	15	15	13	15	15	15	14	15	15	15	15	15	15	15	15	15	15	15	15	13	14	15	15	14
21	2018-03-19	1899-12-31 12:00:00	49	15	15	15	15	12	14	15	15	15	15	15	15	15	15	15	15	15	15	15	15	13	15	15	15	13	15	15	15	14	15	15	15	15	15	15	15	15	15	15	15	15	13	13	14	15	14
22	2018-03-21	1899-12-31 12:00:00	51	15	15	15	15	12	14	15	15	15	15	15	15	15	15	15	15	15	15	15	15	13	15	15	15	13	15	15	14	14	15	15	15	15	15	15	15	15	15	15	15	15	13	13	14	15	14
23	2018-03-23	1899-12-31 12:00:00	53	15	15	15	15	12	14	15	15	15	15	15	15	15	15	15	15	15	15	15	15	13	15	15	15	13	15	15	14	14	15	15	15	15	15	15	15	15	15	15	15	15	13	13	14	15	14
24	2018-03-26	1899-12-31 12:00:00	56	15	15	15	15	12	14	15	15	15	15	15	15	15	15	15	15	15	15	15	15	13	15	15	15	13	15	15	14	14	15	15	15	15	15	15	15	15	15	15	15	15	13	13	14	15	14
25	2018-03-28	1899-12-31 12:00:00	58	15	15	15	15	12	14	15	15	15	15	15	15	15	15	15	15	15	15	15	15	13	15	15	15	13	15	15	12	14	15	15	15	15	15	15	15	15	15	15	15	15	13	13	14	15	14
26	2018-03-30	1899-12-31 12:00:00	60	15	15	15	15	12	14	15	15	15	15	15	15	15	15	15	15	15	15	15	15	13	15	15	15	13	15	15	12	14	15	15	15	15	15	15	15	15	15	15	15	15	13	13	14	15	13
27	2018-04-02	1899-12-31 12:00:00	63	15	15	14	15	12	14	15	15	15	15	15	15	15	15	15	15	15	15	15	15	13	15	15	15	12	15	14	12	14	15	15	15	15	15	15	15	15	15	15	15	12	12	9	12	9	13
28	2018-04-04	1899-12-31 12:00:00	65	15	15	14	15	12	12	15	15	15	14	15	15	15	15	15	15	15	15	15	15	12	15	15	15	12	15	14	12	14	14	15	15	15	15	15	15	15	15	15	15	12	12	8	12	9	12
29	2018-04-06	1899-12-31 12:00:00	67	14	15	14	15	12	12	15	15	15	14	15	15	15	15	15	15	15	15	15	15	12	14	15	14	12	15	14	12	14	14	15	15	15	15	15	15	15	15	15	15	12	12	8	12	9	12
30	2018-04-09	1899-12-31 12:00:00	70	14	15	14	15	11	10	15	15	15	14	15	15	15	15	15	15	15	15	15	15	11	14	15	14	12	15	14	12	13	14	15	15	15	15	15	15	15	15	15	15	10	12	6	9	9	11
31	2018-04-11	1899-12-31 12:00:00	72	14	15	13	15	11	10	15	14	12	14	15	15	15	15	15	15	15	15	15	15	11	14	15	13	11	14	14	12	13	14	15	15	15	15	15	15	15	15	15	15	9	12	4	7	9	11
32	2018-04-13	1899-12-31 12:00:00	74	14	15	13	15	11	10	15	14	11	14	15	15	15	15	15	15	15	15	15	15	11	13	15	13	11	14	13	12	11	14	15	15	15	15	15	15	15	15	15	15	8	12	3	7	8	11
33	2018-04-16	1899-12-31 12:00:00	77	12	14	11	15	11	8	11	13	9	10	15	15	15	15	15	15	15	15	15	15	11	12	15	12	11	13	13	11	10	11	15	15	15	15	15	15	15	15	15	15	6	10	0	5	1	3
34	2018-04-18	1899-12-31 12:00:00	79	12	13	10	14	9	5	10	13	9	10	15	15	15	15	15	15	15	15	15	15	11	11	15	10	11	12	13	11	10	10	15	15	15	15	15	15	15	15	15	15	6	10	-1	3	1	3
35	2018-04-20	1899-12-31 12:00:00	81	11	12	8	13	9	5	8	11	8	6	15	15	15	15	15	15	15	15	15	15	11	11	14	9	11	11	12	11	9	9	15	15	15	15	15	15	15	15	15	15	4	10	-1	3	0	3
36	2018-04-23	1899-12-31 12:00:00	84	9	10	6	10	8	3	4	8	5	3	15	15	15	15	15	15	15	15	15	15	10	9	12	7	9	10	9	10	8	9	15	15	15	15	15	15	15	15	15	15	2	7	-1	-1	-1	2
37	2018-04-25	1899-12-31 12:00:00	86	9	9	5	8	7	3	2	8	4	2	15	15	15	15	15	15	15	15	15	15	8	8	11	6	8	6	8	6	6	9	15	15	15	15	15	15	15	15	15	15	2	4	-1	-1	-1	2
38	2018-04-27	1899-12-31 12:00:00	88	5	6	4	7	4	3	1	7	3	2	15	15	15	15	15	15	15	15	15	15	7	7	11	6	4	4	6	2	6	5	15	15	15	15	15	15	15	15	15	15	2	4	-1	-1	-1	2
39	2018-04-30	1899-12-31 12:00:00	91	3	4	2	5	4	2	0	6	3	2	15	15	15	15	15	15	15	15	15	15	6	6	7	2	2	3	6	1	3	3	15	15	15	15	15	15	15	15	15	15	2	2	-2	-1	-2	1
40	2018-05-02	1899-12-31 12:00:00	93	3	3	1	3	2	2	0	5	2	1	15	15	15	15	15	15	15	15	15	15	3	5	5	1	0	1	1	-1	1	1	15	15	15	15	15	15	15	15	15	15	2	2	-2	-1	-2	1
41	2018-05-04	1899-12-31 12:00:00	95	1	2	0	2	1	0	0	3	2	1	15	15	15	15	15	15	15	15	15	15	-1	4	5	1	0	1	0	-1	1	1	15	15	15	15	15	15	15	15	15	15	2	2	-2	-1	-2	1
42	2018-05-07	1899-12-31 12:00:00	98	-1	1	0	1	0	-1	-1	1	1	0	15	15	15	15	15	15	15	15	15	15	-2	1	4	1	0	1	0	-2	0	1	15	15	15	15	15	15	15	15	15	15	2	2	-2	-1	-2	1
43	2018-05-09	1899-12-31 12:00:00	100	-1	1	0	1	0	-1	-1	1	1	-1	15	15	15	15	15	15	15	15	15	15	-2	1	4	0	0	1	0	-2	0	1	15	15	15	15	15	15	15	15	15	15	2	2	-2	-1	-2	0
44	2018-05-11	1899-12-31 12:00:00	102	-1	1	0	1	0	-1	-1	1	1	-1	15	15	15	15	15	15	15	15	15	15	-2	1	4	0	0	1	0	-2	0	1	15	15	15	15	15	15	15	15	15	15	2	2	-2	-1	-2	0
45	2018-05-14	1899-12-31 12:00:00	105	-1	1	0	1	0	-1	-1	1	1	-1	15	15	15	15	15	15	15	15	15	15	-2	1	4	0	0	1	0	-2	0	1	15	15	15	15	15	15	15	15	15	15	2	2	-2	-1	-2	0
46	2000-01-01	1899-12-31 12:00:00	105	-1	1	0	1	0	-1	-1	1	1	-1	15	15	15	15	15	15	15	15	15	15	-2	1	4	0	0	1	0	-2	0	1	15	15	15	15	15	15	15	15	15	15	2	2	-2	-1	-2	0
47	2000-01-01	1899-12-31 12:00:00	105	-1	1	0	1	0	-1	-1	1	1	-1	15	15	15	15	15	15	15	15	15	15	-2	1	4	0	0	1	0	-2	0	1	15	15	15	15	15	15	15	15	15	15	2	2	-2	-1	-2	0
48	2000-01-01	1899-12-31 12:00:00	105	-1	1	0	1	0	-1	-1	1	1	-1	15	15	15	15	15	15	15	15	15	15	-2	1	4	0	0	1	0	-2	0	1	15	15	15	15	15	15	15	15	15	15	2	2	-2	-1	-2	0
49	2000-01-01	1899-12-31 12:00:00	105	-1	1	0	1	0	-1	-1	1	1	-1	15	15	15	15	15	15	15	15	15	15	-2	1	4	0	0	1	0	-2	0	1	15	15	15	15	15	15	15	15	15	15	2	2	-2	-1	-2	0
50	2000-01-01	1899-12-31 12:00:00	105	-1	1	0	1	0	-1	-1	1	1	-1	15	15	15	15	15	15	15	15	15	15	-2	1	4	0	0	1	0	-2	0	1	15	15	15	15	15	15	15	15	15	15	2	2	-2	-1	-2	0
51	2000-01-01	1899-12-31 12:00:00	105	-1	1	0	1	0	-1	-1	1	1	-1	15	15	15	15	15	15	15	15	15	15	-2	1	4	0	0	1	0	-2	0	1	15	15	15	15	15	15	15	15	15	15	2	2	-2	-1	-2	0
52	2000-01-01	1899-12-31 12:00:00	105	-1	1	0	1	0	-1	-1	1	1	-1	15	15	15	15	15	15	15	15	15	15	-2	1	4	0	0	1	0	-2	0	1	15	15	15	15	15	15	15	15	15	15	2	2	-2	-1	-2	0
53	2000-01-01	1899-12-31 12:00:00	105	-1	1	0	1	0	-1	-1	1	1	-1	15	15	15	15	15	15	15	15	15	15	-2	1	4	0	0	1	0	-2	0	1	15	15	15	15	15	15	15	15	15	15	2	2	-2	-1	-2	0
54	2000-01-01	1899-12-31 12:00:00	105	-1	1	0	1	0	-1	-1	1	1	-1	15	15	15	15	15	15	15	15	15	15	-2	1	4	0	0	1	0	-2	0	1	15	15	15	15	15	15	15	15	15	15	2	2	-2	-1	-2	0
55	2000-01-01	1899-12-31 12:00:00	105	-1	1	0	1	0	-1	-1	1	1	-1	15	15	15	15	15	15	15	15	15	15	-2	1	4	0	0	1	0	-2	0	1	15	15	15	15	15	15	15	15	15	15	2	2	-2	-1	-2	0
56	2000-01-01	1899-12-31 12:00:00	105	-1	1	0	1	0	-1	-1	1	1	-1	15	15	15	15	15	15	15	15	15	15	-2	1	4	0	0	1	0	-2	0	1	15	15	15	15	15	15	15	15	15	15	2	2	-2	-1	-2	0
57	2000-01-01	1899-12-31 12:00:00	105	-1	1	0	1	0	-1	-1	1	1	-1	15	15	15	15	15	15	15	15	15	15	-2	1	4	0	0	1	0	-2	0	1	15	15	15	15	15	15	15	15	15	15	2	2	-2	-1	-2	0
58	2000-01-01	1899-12-31 12:00:00	105	-1	1	0	1	0	-1	-1	1	1	-1	15	15	15	15	15	15	15	15	15	15	-2	1	4	0	0	1	0	-2	0	1	15	15	15	15	15	15	15	15	15	15	2	2	-2	-1	-2	0
59	2000-01-01	1899-12-31 12:00:00	105	-1	1	0	1	0	-1	-1	1	1	-1	15	15	15	15	15	15	15	15	15	15	-2	1	4	0	0	1	0	-2	0	1	15	15	15	15	15	15	15	15	15	15	2	2	-2	-1	-2	0
60	2000-01-01	1899-12-31 12:00:00	105	-1	1	0	1	0	-1	-1	1	1	-1	15	15	15	15	15	15	15	15	15	15	-2	1	4	0	0	1	0	-2	0	1	15	15	15	15	15	15	15	15	15	15	2	2	-2	-1	-2	0
61	2000-01-01	1899-12-31 12:00:00	105	-1	1	0	1	0	-1	-1	1	1	-1	15	15	15	15	15	15	15	15	15	15	-2	1	4	0	0	1	0	-2	0	1	15	15	15	15	15	15	15	15	15	15	2	2	-2	-1	-2	0
62	2000-01-01	1899-12-31 12:00:00	105	-1	1	0	1	0	-1	-1	1	1	-1	15	15	15	15	15	15	15	15	15	15	-2	1	4	0	0	1	0	-2	0	1	15	15	15	15	15	15	15	15	15	15	2	2	-2	-1	-2	0
63	2000-01-01	1899-12-31 12:00:00	105	-1	1	0	1	0	-1	-1	1	1	-1	15	15	15	15	15	15	15	15	15	15	-2	1	4	0	0	1	0	-2	0	1	15	15	15	15	15	15	15	15	15	15	2	2	-2	-1	-2	0
64	2000-01-01	1899-12-31 12:00:00	105	-1	1	0	1	0	-1	-1	1	1	-1	15	15	15	15	15	15	15	15	15	15	-2	1	4	0	0	1	0	-2	0	1	15	15	15	15	15	15	15	15	15	15	2	2	-2	-1	-2	0
65	2000-01-01	1899-12-31 12:00:00	105	-1	1	0	1	0	-1	-1	1	1	-1	15	15	15	15	15	15	15	15	15	15	-2	1	4	0	0	1	0	-2	0	1	15	15	15	15	15	15	15	15	15	15	2	2	-2	-1	-2	0
66	2000-01-01	1899-12-31 12:00:00	105	-1	1	0	1	0	-1	-1	1	1	-1	15	15	15	15	15	15	15	15	15	15	-2	1	4	0	0	1	0	-2	0	1	15	15	15	15	15	15	15	15	15	15	2	2	-2	-1	-2	0
67	2000-01-01	1899-12-31 12:00:00	105	-1	1	0	1	0	-1	-1	1	1	-1	15	15	15	15	15	15	15	15	15	15	-2	1	4	0	0	1	0	-2	0	1	15	15	15	15	15	15	15	15	15	15	2	2	-2	-1	-2	0
68	2000-01-01	1899-12-31 12:00:00	105	-1	1	0	1	0	-1	-1	1	1	-1	15	15	15	15	15	15	15	15	15	15	-2	1	4	0	0	1	0	-2	0	1	15	15	15	15	15	15	15	15	15	15	2	2	-2	-1	-2	0
69	2000-01-01	1899-12-31 12:00:00	105	-1	1	0	1	0	-1	-1	1	1	-1	15	15	15	15	15	15	15	15	15	15	-2	1	4	0	0	1	0	-2	0	1	15	15	15	15	15	15	15	15	15	15	2	2	-2	-1	-2	0
70	2000-01-01	1899-12-31 12:00:00	105	-1	1	0	1	0	-1	-1	1	1	-1	15	15	15	15	15	15	15	15	15	15	-2	1	4	0	0	1	0	-2	0	1	15	15	15	15	15	15	15	15	15	15	2	2	-2	-1	-2	0
71	2000-01-01	1899-12-31 12:00:00	105	-1	1	0	1	0	-1	-1	1	1	-1	15	15	15	15	15	15	15	15	15	15	-2	1	4	0	0	1	0	-2	0	1	15	15	15	15	15	15	15	15	15	15	2	2	-2	-1	-2	0
72	2000-01-01	1899-12-31 12:00:00	105	-1	1	0	1	0	-1	-1	1	1	-1	15	15	15	15	15	15	15	15	15	15	-2	1	4	0	0	1	0	-2	0	1	15	15	15	15	15	15	15	15	15	15	2	2	-2	-1	-2	0
73	2000-01-01	1899-12-31 12:00:00	105	-1	1	0	1	0	-1	-1	1	1	-1	15	15	15	15	15	15	15	15	15	15	-2	1	4	0	0	1	0	-2	0	1	15	15	15	15	15	15	15	15	15	15	2	2	-2	-1	-2	0
74	2000-01-01	1899-12-31 12:00:00	105	-1	1	0	1	0	-1	-1	1	1	-1	15	15	15	15	15	15	15	15	15	15	-2	1	4	0	0	1	0	-2	0	1	15	15	15	15	15	15	15	15	15	15	2	2	-2	-1	-2	0
75	2000-01-01	1899-12-31 12:00:00	105	-1	1	0	1	0	-1	-1	1	1	-1	15	15	15	15	15	15	15	15	15	15	-2	1	4	0	0	1	0	-2	0	1	15	15	15	15	15	15	15	15	15	15	2	2	-2	-1	-2	0
				-1	1	0	1	0	-1	-1	1	1	-1	15	15	15	15	15	15	15	15	15	15	-2	1	4	0	0	1	0	-2	0	1	15	15	15	15	15	15	15	15	15	15	2	2	-2	-1	-2	0
[truncated: 154 more columns]

## Sheet: Px per bottle
			deaths
				15	15	15	15	15	15	15	15	15	15	15	15	15	15	15	15	15	15	15	15	15	15	15	15	15	15	15	15	15	15	15	15	15	15	15	15	15	15	15	15	15	15	15	15	15	15
0				16	14	15	14	15	16	16	14	14	16	0	0	0	0	0	0	0	0	0	0	17	14	11	15	15	14	15	17	15	14	0	0	0	0	0	0	0	0	0	0	13	13	17	16	17	15
	date	time	day	1	2	3	4	5	6	7	8	9	10	11	12	13	14	15	16	17	18	19	20	21	22	23	24	25	26	27	28	29	30	31	32	33	34	35	36	37	38	39	40	41	42	43	44	45	46
1	2018-01-31	1899-12-31 12:00:00	2	1	1	1	1	1	1	1	1	1	1	1	1	1	1	1	1	1	1	1	1	1	1	1	1	1	1	1	1	1	1	1	1	1	1	1	1	1	1	1	1	1	1	1	1	1	1
2	2018-02-02	1899-12-31 12:00:00	4	1	1	1	1	1	1	1	1	1	1	1	1	1	1	1	1	1	1	1	1	1	1	1	1	1	1	1	1	1	1	1	1	1	1	1	1	1	1	1	1	1	1	1	1	1	1
3	2018-02-05	1899-12-31 12:00:00	7	1	1	1	1	1	1	1	1	1	1	1	1	1	1	1	1	1	1	1	1	1	1	1	1	1	1	1	1	1	1	1	1	1	1	1	1	1	1	1	1	1	1	1	1	1	1
4	2018-02-07	1899-12-31 12:00:00	9	1	1	1	1	1	1	1	1	1	1	1	1	1	1	1	1	1	1	1	1	1	1	1	1	1	1	1	1	1	1	1	1	1	1	1	1	1	1	1	1	1	1	1	1	1	1
5	2018-02-09	1899-12-31 12:00:00	11	1	1	1	1	1	1	1	1	1	1	1	1	1	1	1	1	1	1	1	1	1	1	1	1	1	1	1	1	1	1	1	1	1	1	1	1	1	1	1	1	1	1	1	1	1	1
6	2018-02-12	1899-12-31 12:00:00	14	1	1	1	1	1	1	1	1	1	1	1	1	1	1	1	1	1	1	1	1	1	1	1	1	1	1	1	1	1	1	1	1	1	1	1	1	1	1	1	1	1	1	1	1	1	1
7	2018-02-14	1899-12-31 12:00:00	16	1	1	1	1	1	0.933333	1	1	1	1	1	1	1	1	1	1	1	1	1	1	1	1	1	1	1	1	1	1	1	1	1	1	1	1	1	1	1	1	1	1	1	1	1	1	1	1
8	2018-02-16	1899-12-31 12:00:00	18	1	1	1	1	1	0.933333	1	1	1	1	1	1	1	1	1	1	1	1	1	1	1	1	1	1	1	1	1	1	1	1	1	1	1	1	1	1	1	1	1	1	1	1	1	1	1	1
9	2018-02-19	1899-12-31 12:00:00	21	1	1	1	1	1	0.933333	1	1	1	1	1	1	1	1	1	1	1	1	1	1	1	1	1	1	1	1	1	1	1	1	1	1	1	1	1	1	1	1	1	1	1	1	1	1	1	1
10	2018-02-21	1899-12-31 12:00:00	23	1	1	1	1	1	0.933333	1	1	1	1	1	1	1	1	1	1	1	1	1	1	1	1	1	1	1	1	1	1	1	1	1	1	1	1	1	1	1	1	1	1	1	1	1	1	1	1
11	2018-02-23	1899-12-31 12:00:00	25	1	1	1	1	1	0.933333	1	1	1	1	1	1	1	1	1	1	1	1	1	1	1	1	1	1	1	1	1	1	1	1	1	1	1	1	1	1	1	1	1	1	1	1	1	1	1	1
12	2018-02-26	1899-12-31 12:00:00	28	1	1	1	1	1	0.933333	1	1	1	1	1	1	1	1	1	1	1	1	1	1	1	1	1	1	1	1	1	1	1	1	1	1	1	1	1	1	1	1	1	1	1	1	1	1	1	1
13	2018-02-28	1899-12-31 12:00:00	30	1	1	1	1	1	0.933333	1	1	1	1	1	1	1	1	1	1	1	1	1	1	0.933333	1	1	1	1	1	1	1	1	1	1	1	1	1	1	1	1	1	1	1	1	1	1	1	1	1
14	2018-03-02	1899-12-31 12:00:00	32	1	1	1	1	1	0.933333	1	1	1	1	1	1	1	1	1	1	1	1	1	1	0.933333	1	1	1	1	1	1	1	1	1	1	1	1	1	1	1	1	1	1	1	1	1	1	1	1	1
15	2018-03-05	1899-12-31 12:00:00	35	1	1	1	1	1	0.933333	1	1	1	1	1	1	1	1	1	1	1	1	1	1	0.933333	1	1	1	0.928571	1	1	1	1	1	1	1	1	1	1	1	1	1	1	1	1	1	1	1	1	1
16	2018-03-07	1899-12-31 12:00:00	37	1	1	1	1	1	0.933333	1	1	1	1	1	1	1	1	1	1	1	1	1	1	0.933333	1	1	1	0.928571	1	1	1	1	1	1	1	1	1	1	1	1	1	1	1	1	1	1	1	1	1
17	2018-03-09	1899-12-31 12:00:00	39	1	1	1	1	1	0.933333	1	1	1	1	1	1	1	1	1	1	1	1	1	1	0.933333	1	1	1	0.928571	1	1	1	0.933333	1	1	1	1	1	1	1	1	1	1	1	1	1	1	1	1	1
18	2018-03-12	1899-12-31 12:00:00	42	1	1	1	1	1	0.933333	1	1	1	1	1	1	1	1	1	1	1	1	1	1	0.866667	1	1	1	0.928571	1	1	1	0.933333	1	1	1	1	1	1	1	1	1	1	1	1	1	1	1	1	1
19	2018-03-14	1899-12-31 12:00:00	44	1	1	1	1	1	0.933333	1	1	1	1	1	1	1	1	1	1	1	1	1	1	0.866667	1	1	1	0.928571	1	1	1	0.933333	1	1	1	1	1	1	1	1	1	1	1	1	1	1	1	1	1
20	2018-03-16	1899-12-31 12:00:00	46	1	1	1	1	1	0.933333	1	1	1	1	1	1	1	1	1	1	1	1	1	1	0.866667	1	1	1	0.928571	1	1	1	0.933333	1	1	1	1	1	1	1	1	1	1	1	1	1	1	1	1	1
21	2018-03-19	1899-12-31 12:00:00	49	1	1	1	1	1	0.933333	1	1	1	1	1	1	1	1	1	1	1	1	1	1	0.866667	1	1	1	0.928571	1	1	1	0.933333	1	1	1	1	1	1	1	1	1	1	1	1	1	1	1	1	1
22	2018-03-21	1899-12-31 12:00:00	51	1	1	1	1	1	0.933333	1	1	1	1	1	1	1	1	1	1	1	1	1	1	0.866667	1	1	1	0.928571	1	1	0.933333	0.933333	1	1	1	1	1	1	1	1	1	1	1	1	1	1	1	1	1
23	2018-03-23	1899-12-31 12:00:00	53	1	1	1	1	1	0.933333	1	1	1	1	1	1	1	1	1	1	1	1	1	1	0.866667	1	1	1	0.928571	1	1	0.933333	0.933333	1	1	1	1	1	1	1	1	1	1	1	1	1	1	1	1	1
24	2018-03-26	1899-12-31 12:00:00	56	1	1	1	1	1	0.933333	1	1	1	1	1	1	1	1	1	1	1	1	1	1	0.866667	1	1	1	0.928571	1	1	0.933333	0.933333	1	1	1	1	1	1	1	1	1	1	1	1	1	1	1	1	1
25	2018-03-28	1899-12-31 12:00:00	58	1	1	1	1	1	0.933333	1	1	1	1	1	1	1	1	1	1	1	1	1	1	0.866667	1	1	1	0.928571	1	1	0.866667	0.933333	1	1	1	1	1	1	1	1	1	1	1	1	1	1	1	1	1
26	2018-03-30	1899-12-31 12:00:00	60	1	1	1	1	1	0.933333	1	1	1	1	1	1	1	1	1	1	1	1	1	1	0.866667	1	1	1	0.928571	1	1	0.866667	0.933333	1	1	1	1	1	1	1	1	1	1	1	1	1	1	1	1	0.928571
27	2018-04-02	1899-12-31 12:00:00	63	1	1	0.933333	1	1	0.933333	1	1	1	1	1	1	1	1	1	1	1	1	1	1	0.866667	1	1	1	0.928571	1	0.933333	0.866667	0.933333	1	1	1	1	1	1	1	1	1	1	1	0.8	0.923077	0.692308	0.857143	0.733333	0.928571
28	2018-04-04	1899-12-31 12:00:00	65	1	1	0.933333	1	1	0.8	1	1	1	0.933333	1	1	1	1	1	1	1	1	1	1	0.8	1	1	1	0.928571	1	0.933333	0.866667	0.933333	0.933333	1	1	1	1	1	1	1	1	1	1	0.8	0.923077	0.615385	0.857143	0.733333	0.857143
29	2018-04-06	1899-12-31 12:00:00	67	0.933333	1	0.933333	1	1	0.8	1	1	1	0.933333	1	1	1	1	1	1	1	1	1	1	0.8	0.933333	1	0.933333	0.928571	1	0.933333	0.866667	0.933333	0.933333	1	1	1	1	1	1	1	1	1	1	0.8	0.923077	0.615385	0.857143	0.733333	0.857143
30	2018-04-09	1899-12-31 12:00:00	70	0.933333	1	0.933333	1	0.916667	0.666667	1	1	1	0.933333	1	1	1	1	1	1	1	1	1	1	0.733333	0.933333	1	0.933333	0.928571	1	0.933333	0.866667	0.866667	0.933333	1	1	1	1	1	1	1	1	1	1	0.666667	0.923077	0.461538	0.642857	0.733333	0.785714
31	2018-04-11	1899-12-31 12:00:00	72	0.933333	1	0.866667	1	0.916667	0.666667	1	0.933333	0.8	0.933333	1	1	1	1	1	1	1	1	1	1	0.733333	0.933333	1	0.866667	0.85119	0.933333	0.933333	0.866667	0.866667	0.933333	1	1	1	1	1	1	1	1	1	1	0.6	0.923077	0.307692	0.5	0.733333	0.785714
32	2018-04-13	1899-12-31 12:00:00	74	0.933333	1	0.866667	1	0.916667	0.666667	1	0.933333	0.733333	0.933333	1	1	1	1	1	1	1	1	1	1	0.733333	0.866667	1	0.866667	0.85119	0.933333	0.866667	0.866667	0.733333	0.933333	1	1	1	1	1	1	1	1	1	1	0.533333	0.923077	0.230769	0.5	0.651852	0.785714
33	2018-04-16	1899-12-31 12:00:00	77	0.8	0.933333	0.8	1	0.916667	0.533333	0.733333	0.866667	0.6	0.666667	1	1	1	1	1	1	1	1	1	1	0.733333	0.8	1	0.8	0.85119	0.866667	0.866667	0.794444	0.666667	0.733333	1	1	1	1	1	1	1	1	1	1	0.4	0.769231	0	0.357143	0.0814815	0.214286
34	2018-04-18	1899-12-31 12:00:00	79	0.8	0.866667	0.727273	0.933333	0.75	0.333333	0.733333	0.866667	0.6	0.666667	1	1	1	1	1	1	1	1	1	1	0.733333	0.733333	1	0.666667	0.85119	0.8	0.866667	0.794444	0.666667	0.666667	1	1	1	1	1	1	1	1	1	1	0.4	0.769231	#DIV/0!	0.214286	0.0814815	0.214286
35	2018-04-20	1899-12-31 12:00:00	81	0.733333	0.8	0.581818	0.866667	0.75	0.333333	0.586667	0.733333	0.533333	0.4	1	1	1	1	1	1	1	1	1	1	0.733333	0.733333	0.933333	0.6	0.85119	0.733333	0.8	0.794444	0.6	0.6	1	1	1	1	1	1	1	1	1	1	0.266667	0.769231	#DIV/0!	0.214286	0	0.214286
36	2018-04-23	1899-12-31 12:00:00	84	0.6	0.666667	0.436364	0.666667	0.666667	0.2	0.293333	0.533333	0.333333	0.2	1	1	1	1	1	1	1	1	1	1	0.666667	0.6	0.8	0.466667	0.696429	0.666667	0.6	0.722222	0.533333	0.6	1	1	1	1	1	1	1	1	1	1	0.133333	0.538462	#DIV/0!	-0.0714286	#DIV/0!	0.142857
37	2018-04-25	1899-12-31 12:00:00	86	0.6	0.6	0.363636	0.533333	0.583333	0.2	0.146667	0.533333	0.266667	0.133333	1	1	1	1	1	1	1	1	1	1	0.533333	0.533333	0.733333	0.4	0.619048	0.4	0.533333	0.433333	0.4	0.6	1	1	1	1	1	1	1	1	1	1	0.133333	0.307692	#DIV/0!	-0.0714286	#DIV/0!	0.142857
38	2018-04-27	1899-12-31 12:00:00	88	0.333333	0.4	0.290909	0.466667	0.333333	0.2	0.0733333	0.466667	0.2	0.133333	1	1	1	1	1	1	1	1	1	1	0.466667	0.466667	0.733333	0.4	0.309524	0.266667	0.4	0.144444	0.4	0.333333	1	1	1	1	1	1	1	1	1	1	0.133333	0.307692	#DIV/0!	-0.0714286	#DIV/0!	0.142857
39	2018-04-30	1899-12-31 12:00:00	91	0.2	0.266667	0.145455	0.333333	0.333333	0.133333	0	0.4	0.2	0.133333	1	1	1	1	1	1	1	1	1	1	0.4	0.4	0.466667	0.133333	0.154762	0.2	0.4	0.0722222	0.2	0.2	1	1	1	1	1	1	1	1	1	1	0.133333	0.153846	#DIV/0!	-0.0714286	#DIV/0!	0.0714286
40	2018-05-02	1899-12-31 12:00:00	93	0.2	0.2	0.0727273	0.2	0.166667	0.133333	#DIV/0!	0.333333	0.133333	0.0666667	1	1	1	1	1	1	1	1	1	1	0.2	0.333333	0.333333	0.0666667	0	0.0666667	0.0666667	-0.0722222	0.0666667	0.0666667	1	1	1	1	1	1	1	1	1	1	0.133333	0.153846	#DIV/0!	-0.0714286	#DIV/0!	0.0714286
41	2018-05-04	1899-12-31 12:00:00	95	0.0666667	0.133333	0	0.133333	0.0833333	0	#DIV/0!	0.2	0.133333	0.0666667	1	1	1	1	1	1	1	1	1	1	0	0.266667	0.333333	0.0666667	#DIV/0!	0.0666667	0	-0.0722222	0.0666667	0.0666667	1	1	1	1	1	1	1	1	1	1	0.133333	0.153846	#DIV/0!	-0.0714286	#DIV/0!	0.0714286
42	2018-05-07	1899-12-31 12:00:00	98	-0.0666667	0.0666667	#DIV/0!	0.0666667	0	#DIV/0!	#DIV/0!	0.0666667	0.0666667	0	1	1	1	1	1	1	1	1	1	1	0	0.0666667	0.266667	0.0666667	#DIV/0!	0.0666667	#DIV/0!	-0.144444	0	0.0666667	1	1	1	1	1	1	1	1	1	1	0.133333	0.153846	#DIV/0!	-0.0714286	#DIV/0!	0.0714286
43	2018-05-09	1899-12-31 12:00:00	100	-0.0666667	0.0666667	#DIV/0!	0.0666667	#DIV/0!	#DIV/0!	#DIV/0!	0.0666667	0.0666667	#DIV/0!	1	1	1	1	1	1	1	1	1	1	0	0.0666667	0.266667	0	#DIV/0!	0.0666667	#DIV/0!	-0.144444	#DIV/0!	0.0666667	1	1	1	1	1	1	1	1	1	1	0.133333	0.153846	#DIV/0!	-0.0714286	#DIV/0!	0
44	2018-05-11	1899-12-31 12:00:00	102	-0.0666667	0.0666667	#DIV/0!	0.0666667	#DIV/0!	#DIV/0!	#DIV/0!	0.0666667	0.0666667	#DIV/0!	1	1	1	1	1	1	1	1	1	1	0	0.0666667	0.266667	#DIV/0!	#DIV/0!	0.0666667	#DIV/0!	-0.144444	#DIV/0!	0.0666667	1	1	1	1	1	1	1	1	1	1	0.133333	0.153846	#DIV/0!	-0.0714286	#DIV/0!	#DIV/0!
45	2018-05-14	1899-12-31 12:00:00	105	-0.0666667	0.0666667	#DIV/0!	0.0666667	#DIV/0!	#DIV/0!	#DIV/0!	0.0666667	0.0666667	#DIV/0!	1	1	1	1	1	1	1	1	1	1	0	0.0666667	0.266667	#DIV/0!	#DIV/0!	0.0666667	#DIV/0!	-0.144444	#DIV/0!	0.0666667	1	1	1	1	1	1	1	1	1	1	0.133333	0.153846	#DIV/0!	-0.0714286	#DIV/0!	#DIV/0!
46	2000-01-01	1899-12-31 12:00:00	105	-0.0666667	0.0666667	#DIV/0!	0.0666667	#DIV/0!	#DIV/0!	#DIV/0!	0.0666667	0.0666667	#DIV/0!	1	1	1	1	1	1	1	1	1	1	0	0.0666667	0.266667	#DIV/0!	#DIV/0!	0.0666667	#DIV/0!	-0.144444	#DIV/0!	0.0666667	1	1	1	1	1	1	1	1	1	1	0.133333	0.153846	#DIV/0!	-0.0714286	#DIV/0!	#DIV/0!
47	2000-01-01	1899-12-31 12:00:00	105	-0.0666667	0.0666667	#DIV/0!	0.0666667	#DIV/0!	#DIV/0!	#DIV/0!	0.0666667	0.0666667	#DIV/0!	1	1	1	1	1	1	1	1	1	1	0	0.0666667	0.266667	#DIV/0!	#DIV/0!	0.0666667	#DIV/0!	-0.144444	#DIV/0!	0.0666667	1	1	1	1	1	1	1	1	1	1	0.133333	0.153846	#DIV/0!	-0.0714286	#DIV/0!	#DIV/0!
48	2000-01-01	1899-12-31 12:00:00	105	-0.0666667	0.0666667	#DIV/0!	0.0666667	#DIV/0!	#DIV/0!	#DIV/0!	0.0666667	0.0666667	#DIV/0!	1	1	1	1	1	1	1	1	1	1	0	0.0666667	0.266667	#DIV/0!	#DIV/0!	0.0666667	#DIV/0!	-0.144444	#DIV/0!	0.0666667	1	1	1	1	1	1	1	1	1	1	0.133333	0.153846	#DIV/0!	-0.0714286	#DIV/0!	#DIV/0!
49	2000-01-01	1899-12-31 12:00:00	105	-0.0666667	0.0666667	#DIV/0!	0.0666667	#DIV/0!	#DIV/0!	#DIV/0!	0.0666667	0.0666667	#DIV/0!	1	1	1	1	1	1	1	1	1	1	0	0.0666667	0.266667	#DIV/0!	#DIV/0!	0.0666667	#DIV/0!	-0.144444	#DIV/0!	0.0666667	1	1	1	1	1	1	1	1	1	1	0.133333	0.153846	#DIV/0!	-0.0714286	#DIV/0!	#DIV/0!
50	2000-01-01	1899-12-31 12:00:00	105	-0.0666667	0.0666667	#DIV/0!	0.0666667	#DIV/0!	#DIV/0!	#DIV/0!	0.0666667	0.0666667	#DIV/0!	1	1	1	1	1	1	1	1	1	1	0	0.0666667	0.266667	#DIV/0!	#DIV/0!	0.0666667	#DIV/0!	-0.144444	#DIV/0!	0.0666667	1	1	1	1	1	1	1	1	1	1	0.133333	0.153846	#DIV/0!	-0.0714286	#DIV/0!	#DIV/0!
51	2000-01-01	1899-12-31 12:00:00	105	-0.0666667	0.0666667	#DIV/0!	0.0666667	#DIV/0!	#DIV/0!	#DIV/0!	0.0666667	0.0666667	#DIV/0!	1	1	1	1	1	1	1	1	1	1	0	0.0666667	0.266667	#DIV/0!	#DIV/0!	0.0666667	#DIV/0!	-0.144444	#DIV/0!	0.0666667	1	1	1	1	1	1	1	1	1	1	0.133333	0.153846	#DIV/0!	-0.0714286	#DIV/0!	#DIV/0!
52	2000-01-01	1899-12-31 12:00:00	105	-0.0666667	0.0666667	#DIV/0!	0.0666667	#DIV/0!	#DIV/0!	#DIV/0!	0.0666667	0.0666667	#DIV/0!	1	1	1	1	1	1	1	1	1	1	0	0.0666667	0.266667	#DIV/0!	#DIV/0!	0.0666667	#DIV/0!	-0.144444	#DIV/0!	0.0666667	1	1	1	1	1	1	1	1	1	1	0.133333	0.153846	#DIV/0!	-0.0714286	#DIV/0!	#DIV/0!
53	2000-01-01	1899-12-31 12:00:00	105	-0.0666667	0.0666667	#DIV/0!	0.0666667	#DIV/0!	#DIV/0!	#DIV/0!	0.0666667	0.0666667	#DIV/0!	1	1	1	1	1	1	1	1	1	1	0	0.0666667	0.266667	#DIV/0!	#DIV/0!	0.0666667	#DIV/0!	-0.144444	#DIV/0!	0.0666667	1	1	1	1	1	1	1	1	1	1	0.133333	0.153846	#DIV/0!	-0.0714286	#DIV/0!	#DIV/0!
54	2000-01-01	1899-12-31 12:00:00	105	-0.0666667	0.0666667	#DIV/0!	0.0666667	#DIV/0!	#DIV/0!	#DIV/0!	0.0666667	0.0666667	#DIV/0!	1	1	1	1	1	1	1	1	1	1	0	0.0666667	0.266667	#DIV/0!	#DIV/0!	0.0666667	#DIV/0!	-0.144444	#DIV/0!	0.0666667	1	1	1	1	1	1	1	1	1	1	0.133333	0.153846	#DIV/0!	-0.0714286	#DIV/0!	#DIV/0!
55	2000-01-01	1899-12-31 12:00:00	105	-0.0666667	0.0666667	#DIV/0!	0.0666667	#DIV/0!	#DIV/0!	#DIV/0!	0.0666667	0.0666667	#DIV/0!	1	1	1	1	1	1	1	1	1	1	0	0.0666667	0.266667	#DIV/0!	#DIV/0!	0.0666667	#DIV/0!	-0.144444	#DIV/0!	0.0666667	1	1	1	1	1	1	1	1	1	1	0.133333	0.153846	#DIV/0!	-0.0714286	#DIV/0!	#DIV/0!
56	2000-01-01	1899-12-31 12:00:00	105	-0.0666667	0.0666667	#DIV/0!	0.0666667	#DIV/0!	#DIV/0!	#DIV/0!	0.0666667	0.0666667	#DIV/0!	1	1	1	1	1	1	1	1	1	1	0	0.0666667	0.266667	#DIV/0!	#DIV/0!	0.0666667	#DIV/0!	-0.144444	#DIV/0!	0.0666667	1	1	1	1	1	1	1	1	1	1	0.133333	0.153846	#DIV/0!	-0.0714286	#DIV/0!	#DIV/0!
57	2000-01-01	1899-12-31 12:00:00	105	-0.0666667	0.0666667	#DIV/0!	0.0666667	#DIV/0!	#DIV/0!	#DIV/0!	0.0666667	0.0666667	#DIV/0!	1	1	1	1	1	1	1	1	1	1	0	0.0666667	0.266667	#DIV/0!	#DIV/0!	0.0666667	#DIV/0!	-0.144444	#DIV/0!	0.0666667	1	1	1	1	1	1	1	1	1	1	0.133333	0.153846	#DIV/0!	-0.0714286	#DIV/0!	#DIV/0!
58	2000-01-01	1899-12-31 12:00:00	105	-0.0666667	0.0666667	#DIV/0!	0.0666667	#DIV/0!	#DIV/0!	#DIV/0!	0.0666667	0.0666667	#DIV/0!	1	1	1	1	1	1	1	1	1	1	0	0.0666667	0.266667	#DIV/0!	#DIV/0!	0.0666667	#DIV/0!	-0.144444	#DIV/0!	0.0666667	1	1	1	1	1	1	1	1	1	1	0.133333	0.153846	#DIV/0!	-0.0714286	#DIV/0!	#DIV/0!
59	2000-01-01	1899-12-31 12:00:00	105	-0.0666667	0.0666667	#DIV/0!	0.0666667	#DIV/0!	#DIV/0!	#DIV/0!	0.0666667	0.0666667	#DIV/0!	1	1	1	1	1	1	1	1	1	1	0	0.0666667	0.266667	#DIV/0!	#DIV/0!	0.0666667	#DIV/0!	-0.144444	#DIV/0!	0.0666667	1	1	1	1	1	1	1	1	1	1	0.133333	0.153846	#DIV/0!	-0.0714286	#DIV/0!	#DIV/0!
60	2000-01-01	1899-12-31 12:00:00	105	-0.0666667	0.0666667	#DIV/0!	0.0666667	#DIV/0!	#DIV/0!	#DIV/0!	0.0666667	0.0666667	#DIV/0!	1	1	1	1	1	1	1	1	1	1	0	0.0666667	0.266667	#DIV/0!	#DIV/0!	0.0666667	#DIV/0!	-0.144444	#DIV/0!	0.0666667	1	1	1	1	1	1	1	1	1	1	0.133333	0.153846	#DIV/0!	-0.0714286	#DIV/0!	#DIV/0!
61	2000-01-01	1899-12-31 12:00:00	105	-0.0666667	0.0666667	#DIV/0!	0.0666667	#DIV/0!	#DIV/0!	#DIV/0!	0.0666667	0.0666667	#DIV/0!	1	1	1	1	1	1	1	1	1	1	0	0.0666667	0.266667	#DIV/0!	#DIV/0!	0.0666667	#DIV/0!	-0.144444	#DIV/0!	0.0666667	1	1	1	1	1	1	1	1	1	1	0.133333	0.153846	#DIV/0!	-0.0714286	#DIV/0!	#DIV/0!
62	2000-01-01	1899-12-31 12:00:00	105	-0.0666667	0.0666667	#DIV/0!	0.0666667	#DIV/0!	#DIV/0!	#DIV/0!	0.0666667	0.0666667	#DIV/0!	1	1	1	1	1	1	1	1	1	1	0	0.0666667	0.266667	#DIV/0!	#DIV/0!	0.0666667	#DIV/0!	-0.144444	#DIV/0!	0.0666667	1	1	1	1	1	1	1	1	1	1	0.133333	0.153846	#DIV/0!	-0.0714286	#DIV/0!	#DIV/0!
63	2000-01-01	1899-12-31 12:00:00	105	-0.0666667	0.0666667	#DIV/0!	0.0666667	#DIV/0!	#DIV/0!	#DIV/0!	0.0666667	0.0666667	#DIV/0!	1	1	1	1	1	1	1	1	1	1	0	0.0666667	0.266667	#DIV/0!	#DIV/0!	0.0666667	#DIV/0!	-0.144444	#DIV/0!	0.0666667	1	1	1	1	1	1	1	1	1	1	0.133333	0.153846	#DIV/0!	-0.0714286	#DIV/0!	#DIV/0!
64	2000-01-01	1899-12-31 12:00:00	105	-0.0666667	0.0666667	#DIV/0!	0.0666667	#DIV/0!	#DIV/0!	#DIV/0!	0.0666667	0.0666667	#DIV/0!	1	1	1	1	1	1	1	1	1	1	0	0.0666667	0.266667	#DIV/0!	#DIV/0!	0.0666667	#DIV/0!	-0.144444	#DIV/0!	0.0666667	1	1	1	1	1	1	1	1	1	1	0.133333	0.153846	#DIV/0!	-0.0714286	#DIV/0!	#DIV/0!
65	2000-01-01	1899-12-31 12:00:00	105	-0.0666667	0.0666667	#DIV/0!	0.0666667	#DIV/0!	#DIV/0!	#DIV/0!	0.0666667	0.0666667	#DIV/0!	1	1	1	1	1	1	1	1	1	1	0	0.0666667	0.266667	#DIV/0!	#DIV/0!	0.0666667	#DIV/0!	-0.144444	#DIV/0!	0.0666667	1	1	1	1	1	1	1	1	1	1	0.133333	0.153846	#DIV/0!	-0.0714286	#DIV/0!	#DIV/0!
66	2000-01-01	1899-12-31 12:00:00	105	-0.0666667	0.0666667	#DIV/0!	0.0666667	#DIV/0!	#DIV/0!	#DIV/0!	0.0666667	0.0666667	#DIV/0!	1	1	1	1	1	1	1	1	1	1	0	0.0666667	0.266667	#DIV/0!	#DIV/0!	0.0666667	#DIV/0!	-0.144444	#DIV/0!	0.0666667	1	1	1	1	1	1	1	1	1	1	0.133333	0.153846	#DIV/0!	-0.0714286	#DIV/0!	#DIV/0!
67	2000-01-01	1899-12-31 12:00:00	105	-0.0666667	0.0666667	#DIV/0!	0.0666667	#DIV/0!	#DIV/0!	#DIV/0!	0.0666667	0.0666667	#DIV/0!	1	1	1	1	1	1	1	1	1	1	0	0.0666667	0.266667	#DIV/0!	#DIV/0!	0.0666667	#DIV/0!	-0.144444	#DIV/0!	0.0666667	1	1	1	1	1	1	1	1	1	1	0.133333	0.153846	#DIV/0!	-0.0714286	#DIV/0!	#DIV/0!
68	2000-01-01	1899-12-31 12:00:00	105	-0.0666667	0.0666667	#DIV/0!	0.0666667	#DIV/0!	#DIV/0!	#DIV/0!	0.0666667	0.0666667	#DIV/0!	1	1	1	1	1	1	1	1	1	1	0	0.0666667	0.266667	#DIV/0!	#DIV/0!	0.0666667	#DIV/0!	-0.144444	#DIV/0!	0.0666667	1	1	1	1	1	1	1	1	1	1	0.133333	0.153846	#DIV/0!	-0.0714286	#DIV/0!	#DIV/0!
69	2000-01-01	1899-12-31 12:00:00	105	-0.0666667	0.0666667	#DIV/0!	0.0666667	#DIV/0!	#DIV/0!	#DIV/0!	0.0666667	0.0666667	#DIV/0!	1	1	1	1	1	1	1	1	1	1	0	0.0666667	0.266667	#DIV/0!	#DIV/0!	0.0666667	#DIV/0!	-0.144444	#DIV/0!	0.0666667	1	1	1	1	1	1	1	1	1	1	0.133333	0.153846	#DIV/0!	-0.0714286	#DIV/0!	#DIV/0!
70	2000-01-01	1899-12-31 12:00:00	105	-0.0666667	0.0666667	#DIV/0!	0.0666667	#DIV/0!	#DIV/0!	#DIV/0!	0.0666667	0.0666667	#DIV/0!	1	1	1	1	1	1	1	1	1	1	0	0.0666667	0.266667	#DIV/0!	#DIV/0!	0.0666667	#DIV/0!	-0.144444	#DIV/0!	0.0666667	1	1	1	1	1	1	1	1	1	1	0.133333	0.153846	#DIV/0!	-0.0714286	#DIV/0!	#DIV/0!
71	2000-01-01	1899-12-31 12:00:00	105	-0.0666667	0.0666667	#DIV/0!	0.0666667	#DIV/0!	#DIV/0!	#DIV/0!	0.0666667	0.0666667	#DIV/0!	1	1	1	1	1	1	1	1	1	1	0	0.0666667	0.266667	#DIV/0!	#DIV/0!	0.0666667	#DIV/0!	-0.144444	#DIV/0!	0.0666667	1	1	1	1	1	1	1	1	1	1	0.133333	0.153846	#DIV/0!	-0.0714286	#DIV/0!	#DIV/0!
72	2000-01-01	1899-12-31 12:00:00	105	-0.0666667	0.0666667	#DIV/0!	0.0666667	#DIV/0!	#DIV/0!	#DIV/0!	0.0666667	0.0666667	#DIV/0!	1	1	1	1	1	1	1	1	1	1	0	0.0666667	0.266667	#DIV/0!	#DIV/0!	0.0666667	#DIV/0!	-0.144444	#DIV/0!	0.0666667	1	1	1	1	1	1	1	1	1	1	0.133333	0.153846	#DIV/0!	-0.0714286	#DIV/0!	#DIV/0!
73	2000-01-01	1899-12-31 12:00:00	105	-0.0666667	0.0666667	#DIV/0!	0.0666667	#DIV/0!	#DIV/0!	#DIV/0!	0.0666667	0.0666667	#DIV/0!	1	1	1	1	1	1	1	1	1	1	0	0.0666667	0.266667	#DIV/0!	#DIV/0!	0.0666667	#DIV/0!	-0.144444	#DIV/0!	0.0666667	1	1	1	1	1	1	1	1	1	1	0.133333	0.153846	#DIV/0!	-0.0714286	#DIV/0!	#DIV/0!
74	2000-01-01	1899-12-31 12:00:00	105	-0.0666667	0.0666667	#DIV/0!	0.0666667	#DIV/0!	#DIV/0!	#DIV/0!	0.0666667	0.0666667	#DIV/0!	1	1	1	1	1	1	1	1	1	1	0	0.0666667	0.266667	#DIV/0!	#DIV/0!	0.0666667	#DIV/0!	-0.144444	#DIV/0!	0.0666667	1	1	1	1	1	1	1	1	1	1	0.133333	0.153846	#DIV/0!	-0.0714286	#DIV/0!	#DIV/0!
75	2000-01-01	1899-12-31 12:00:00	105	-0.0666667	0.0666667	#DIV/0!	0.0666667	#DIV/0!	#DIV/0!	#DIV/0!	0.0666667	0.0666667	#DIV/0!	1	1	1	1	1	1	1	1	1	1	0	0.0666667	0.266667	#DIV/0!	#DIV/0!	0.0666667	#DIV/0!	-0.144444	#DIV/0!	0.0666667	1	1	1	1	1	1	1	1	1	1	0.133333	0.153846	#DIV/0!	-0.0714286	#DIV/0!	#DIV/0!
[truncated: 154 more columns]

## Sheet: log rank data
deaths
log-rank test data												at risk											Expected values
day	UASInRDN RU-	UASINR DN RU+	UAS INR Active RU -	UAS INR Active RU+	UAS INR RU-	UAS INR RU+	W1118 RU-	W1118 RU+	UAS Odd RU-	UAS Odd RU+		UASInRDN RU-	UASINR DN RU+	UAS INR Active RU -	UAS INR Active RU+	UAS INR RU-	UAS INR RU+	W1118 RU-	W1118 RU+	UAS Odd RU-	UAS Odd RU+		UASInRDN RU-									UASINR DN RU+								UAS INR Active RU -							UAS INR Active RU+
sum	150	147	119	145	152	147	107	104	151	153													UASINR DN RU+	UAS INR Active RU -	UAS INR Active RU+	UAS INR RU-	UAS INR RU+	W1118 RU-	W1118 RU+	UAS Odd RU-	UAS Odd RU+	UAS INR Active RU -	UAS INR Active RU+	UAS INR RU-	UAS INR RU+	W1118 RU-	W1118 RU+	UAS Odd RU-	UAS Odd RU+	UAS INR Active RU+	UAS INR RU-	UAS INR RU+	W1118 RU-	W1118 RU+	UAS Odd RU-	UAS Odd RU+	UAS INR RU-	UAS INR RU+	W1118 RU-
0	0	0	0	0	0	0	0	0	0	0		150	147	119	145	152	147	107	104	151	153		0	0	0	0	0	0	0	0	0	0	0	0	0	0	0	0	0	0	0	0	0	0	0	0	0	0	0
2	0	0	0	0	0	0	0	0	0	0		150	147	119	145	152	147	107	104	151	153		0	0	0	0	0	0	0	0	0	0	0	0	0	0	0	0	0	0	0	0	0	0	0	0	0	0	0
4	0	0	0	0	0	0	0	0	0	0		150	146	119	145	152	147	106	104	151	153		0	0	0	0	0	0	0	0	0	0	0	0	0	0	0	0	0	0	0	0	0	0	0	0	0	0	0
7	0	0	0	0	0	0	0	0	0	0		150	146	119	145	152	147	106	104	151	153		0	0	0	0	0	0	0	0	0	0	0	0	0	0	0	0	0	0	0	0	0	0	0	0	0	0	0
9	0	0	0	0	0	0	0	0	0	0		150	146	119	145	152	147	106	104	151	153		0	0	0	0	0	0	0	0	0	0	0	0	0	0	0	0	0	0	0	0	0	0	0	0	0	0	0
11	0	0	0	0	0	1	1	0	0	0		150	146	115	145	152	147	106	104	151	153		0	0	0	0	0.505051	0.585938	0	0	0	0	0	0	0.498294	0.579365	0	0	0	0	0	0.438931	0.520362	0	0	0	0	0.496575	0.577689
14	0	0	0	0	0	3	0	0	0	0		150	146	115	145	152	146	105	104	151	153		0	0	0	0	1.52027	0	0	0	0	0	0	0	1.5	0	0	0	0	0	0	1.32184	0	0	0	0	0	1.49485	0
16	1	0	0	0	0	1	2	0	0	0		150	146	115	145	152	143	105	104	151	153		0.506757	0.566038	0.508475	0.496689	1.02389	1.76471	0.590551	0.498339	0.49505	0	0	0	0.50519	1.16335	0	0	0	0	0	0.445736	1.04545	0	0	0	0	0.503472	1.16
18	0	0	0	0	0	0	0	0	0	0		149	146	115	145	152	141	103	104	151	153		0	0	0	0	0	0	0	0	0	0	0	0	0	0	0	0	0	0	0	0	0	0	0	0	0	0	0
21	0	0	0	0	0	1	1	0	0	0		149	146	115	145	152	140	103	94	151	153		0	0	0	0	0.515571	0.59127	0	0	0	0	0	0	0.51049	0.586345	0	0	0	0	0	0.45098	0.527523	0	0	0	0	0.508772	0.584677
23	0	0	0	0	0	1	0	0	0	0		149	146	115	145	152	139	102	93	151	153		0	0	0	0	0.517361	0	0	0	0	0	0	0	0.512281	0	0	0	0	0	0	0.452756	0	0	0	0	0	0.510563	0
25	0	0	0	0	1	0	0	0	0	0		149	146	115	145	151	138	102	93	151	153		0	0	0	0.496667	0	0	0	0	0	0	0	0.491582	0	0	0	0	0	0	0.432331	0	0	0	0	0	0.489865	0	0
28	0	0	0	0	0	1	0	0	0	0		149	146	115	145	150	136	102	93	151	153		0	0	0	0	0.522807	0	0	0	0	0	0	0	0.51773	0	0	0	0	0	0	0.458167	0	0	0	0	0	0.516014	0
30	0	1	0	0	0	0	0	0	0	1		149	146	115	145	147	135	102	93	151	153		0.505085	0	0	0	0	0	0	0	0.493377	0.559387	0.501718	0.498294	0.519573	0.58871	0.610879	0.491582	0.976589	0	0	0	0	0	0	0.429104	0	0	0
32	0	0	0	0	0	0	0	0	0	0		146	145	115	144	145	135	102	93	151	152		0	0	0	0	0	0	0	0	0	0	0	0	0	0	0	0	0	0	0	0	0	0	0	0	0	0	0
35	0	1	0	1	0	0	0	0	0	0		146	145	115	144	145	135	102	93	151	152		0.501718	0	0.503448	0	0	0	0	0	0	0.557692	1.00346	0.5	0.517857	0.587045	0.609244	0.489865	0.488215	0.444015	0	0	0	0	0	0	0.49827	0.516129	0.585366
37	0	0	0	0	1	0	0	0	0	1		146	144	115	142	145	135	102	93	150	152		0	0	0	0.501718	0	0	0	0	0.489933	0	0	0.49827	0	0	0	0	0.486486	0	0.442308	0	0	0	0	0.430712	0.494774	0	0
39	0	1	0	0	0	0	0	0	1	0		146	144	115	142	144	135	102	93	150	151		0.503448	0	0	0	0	0	0	0.493243	0	0.555985	0.503497	0.5	0.516129	0.585366	0.607595	0.979592	0.488136	0	0	0	0	0	0.433962	0	0	0	0
42	0	1	0	0	0	0	0	0	0	0		146	143	115	142	144	135	101	93	149	151		0.50519	0	0	0	0	0	0	0	0	0.554264	0.501754	0.498258	0.514388	0.586066	0.605932	0.489726	0.486395	0	0	0	0	0	0	0	0	0	0
44	0	0	0	0	0	0	0	0	0	0		146	142	115	142	144	135	101	93	149	151		0	0	0	0	0	0	0	0	0	0	0	0	0	0	0	0	0	0	0	0	0	0	0	0	0	0	0
46	0	0	0	1	0	0	0	1	0	1		146	142	115	142	144	135	101	93	148	151		0	0	0.506944	0	0	0	0.610879	0	0.491582	0	0.5	0	0	0	0.604255	0	0.484642	0.447471	0	0	0	0.552885	0	0.432331	0.496503	0.512635	0.584362
49	0	0	0	1	1	0	0	0	1	0		146	142	115	141	144	135	101	92	148	150		0	0	0.508711	0.503448	0	0	0	0.496599	0	0	0.501767	0.496503	0	0	0	0.489655	0	0.449219	0.444015	0	0	0	0.437262	0	0.989474	0.51087	0.582645
51	0	1	0	0	0	0	0	0	0	1		146	142	113	139	139	135	101	92	147	150		0.506944	0	0	0	0	0	0	0	0.493243	0.556863	0.505338	0.505338	0.512635	0.584362	0.606838	0.491349	0.972603	0	0	0	0	0	0	0.429658	0	0	0
53	0	0	0	1	0	0	2	2	1	0		146	141	113	139	139	135	101	92	147	149		0	0	0.512281	0	0	1.18219	1.22689	0.498294	0	0	0.503571	0	0	1.16529	1.2103	0.489583	0	0.448413	0	0	1.05607	1.10244	0.434615	0	0.5	0.507299	1.7375
56	0	0	0	2	4	2	0	0	1	4		146	141	113	138	137	135	99	90	146	149		0	0	1.02817	2.0636	1.03915	0	0	0.5	1.97966	0	1.01075	2.02878	1.02174	0	0	0.491289	1.94483	0.900398	1.808	0.91129	0	0	0.436293	1.72519	3.01091	2.02198	1.16456
58	0	1	0	3	1	0	0	1	2	2		146	141	113	136	133	123	99	90	145	145		0.508711	0	1.55319	0.523297	0	0	0.618644	1.00344	1.00344	0.555118	2.0361	1.0292	0.534091	0.5875	1.22078	1.47902	1.47902	1.36145	0.45935	0	0	0.55665	0.875969	0.875969	2.0223	1.57529	1.73617
60	0	0	1	0	1	0	4	1	0	0		146	139	113	129	132	121	99	89	143	143		0	0.563707	0	0.52518	0	2.38367	0.621277	0	0	0.551587	0	0.512915	0	2.33613	0.609649	0	0	0.466942	0.922449	0.482906	2.66509	1.11881	0.441406	0.441406	0.494253	0	2.26316
63	1	1	20	16	51	6	3	2	2	9		146	139	112	129	131	121	95	88	143	143		1.02456	11.8837	9.02545	27.4079	3.82772	2.42324	1.87179	1.51557	5.0519	11.6295	8.81716	26.7704	3.74231	2.37607	1.837	1.47872	4.92908	16.7303	32.7243	12.4979	12.4444	12.32	9.66275	12.7373	33.2423	11.352	10.942
65	3	2	3	1	1	3	0	1	0	3		145	137	90	113	79	114	92	86	141	134		2.57092	3.70213	2.24806	2.58929	3.35907	1.83544	2.51082	1.52098	3.11828	3.01762	1.644	1.90278	2.72908	1.19651	1.84305	0.985612	2.52768	1.7734	2.13018	2.64706	1.48352	2.04545	1.16883	2.41071	1.17708	1.99119	0.55122
67	1	2	0	8	1	0	6	0	0	0		142	135	87	110	78	110	92	85	141	131		1.53791	0.620087	5.07143	1.29091	0.563492	4.24786	0.625551	0.501767	0.520147	1.21622	5.5102	1.90141	1.10204	4.75771	1.22727	0.978261	1.01504	3.53299	0.527273	0	2.9162	0	0	0	5.26596	4	7.62376
70	3	2	15	26	5	12	24	10	6	14		141	133	87	102	77	110	86	85	141	131		2.57299	11.1316	16.8272	5.17431	8.42629	16.7709	8.11062	4.5	8.8125	10.2773	15.8468	4.43333	7.66255	15.79	7.3211	3.88321	8.06061	18.873	10.6098	11.9239	19.6127	12.6453	8.01316	11.5734	17.6648	18.283	27.1277
72	5	3	5	5	3	4	6	4	1	9		138	131	71	74	71	98	60	75	135	117		4.10409	6.60287	6.50943	5.2823	5.26271	7.66667	5.83099	3.03297	7.57647	5.18812	5.1122	3.89109	4.00437	6.17277	4.45146	1.96992	6.33871	4.89655	4	3.78107	5.96183	4.37671	2.06796	5.28723	4.08276	3.87209	6.07463
74	1	4	3	2	2	5	11	1	2	2		133	128	66	68	67	94	53	71	134	108		2.54789	2.67337	1.98507	1.995	3.51542	8.58065	1.30392	1.49438	1.6556	4.61856	3.91837	3.93846	5.18919	10.6077	3.21608	2.9313	3.25424	2.46269	2.4812	3.3	7.76471	1.92701	1.65	1.89655	2.01481	2.93827	7.30579
77	17	8	29	18	15	10	16	14	15	15		132	124	63	65	63	89	41	68	132	106		12.8906	31.1385	23.4518	21.6615	16.1267	25.1792	20.46	16	17.7479	24.5348	17.0582	15.2513	10.4789	18.0364	14.2083	11.1406	12.4	23.1328	22	16.1645	27.2596	20.6794	14.2154	16.4024	16.7578	11.8182	20.8491
79	8	5	3	14	7	12	4	6	7	6		114	116	34	47	48	78	25	53	117	91		6.44348	8.47297	15.5776	10.5556	11.875	9.84173	9.55689	7.4026	7.78537	6.18667	13.5215	8.4878	10.1649	7.40426	7.5503	5.97425	6.16425	7.1358	4.14634	4.55357	4.0339	3.51724	2.25166	2.448	10.3895	9.776	11.75
81	14	6	6	4	9	3	3	4	9	7		105	111	31	33	41	65	21	47	110	85		9.72222	15.4412	13.6957	16.5411	10.5	14.1667	12.4342	11.2326	11.6053	9.38028	7.70833	10.9539	5.67614	7.56818	7.02532	7.53394	7.36224	4.84375	6.45833	2.90625	5.36538	3.97436	3.29787	3.47414	5.7973	2.35714	4.27778
84	25	15	13	13	16	14	8	14	21	26		91	105	25	29	32	61	18	43	101	78		18.5714	29.8103	28.8167	30.3333	23.3487	27.5505	26.4851	21.8021	27.4615	22.6154	21.9403	23.7591	18.3434	19.6341	20.5743	18.3495	23.5246	12.037	12.7193	7.84884	12.2093	9.92647	6.74603	9.46602	13.7869	8.7	12.9574
86	9	17	3	5	5	12	1	2	12	9		66	90	12	16	16	47	9	29	80	52		11	10.1538	11.2683	11.2683	12.2655	8.8	7.64211	9.49315	10.0678	17.6471	18.6792	18.6792	19.0511	16.3636	14.3697	15.3529	16.4789	3.42857	3.42857	3.05085	2.28571	1.46341	1.95652	2.25	5	4.31746	3.84
88	15	18	1	2	3	9	0	5	9	5		57	73	9	11	10	33	8	27	68	43		14.4692	13.8182	14.25	15.3134	15.2	13.1538	13.5714	10.944	11.4	16.9146	17.381	18.4699	18.5943	16.2222	16.79	13.9787	14.4741	1.35	1.89474	2.14286	0.529412	1.5	1.16883	1.03846	2.61905	2.75	1.15789
91	11	19	7	6	5	7	0	10	32	16		42	55	8	9	7	24	8	22	59	38		12.9897	15.12	14	13.7143	11.4545	9.24	13.7812	17.8812	14.175	22.6984	21.4844	21.2903	18.1013	16.5873	20.7143	24.6053	20.6989	6.11765	6.4	3.5	3.5	4.53333	4.65672	4	6.1875	3.54545	3.17647
93	9	22	0	0	1	6	5	6	8	4		31	36	1	2	2	16	8	12	26	21		14.3433	8.71875	8.45455	9.39394	9.89362	11.1282	10.814	9.24561	7.75	21.4054	20.8421	21.7895	19.3846	22.0909	21	17.4194	16.4211	0	0.333333	0.352941	0.555556	0.461538	0.296296	0.181818	0.5	0.666667	1
95	10	5	0	1	0	3	0	1	7	8		22	14	1	2	1	10	3	6	18	16		9.16667	9.56522	10.0833	9.56522	8.9375	8.8	8.64286	9.35	10.4211	4.66667	5.25	4.66667	4.66667	4.11765	4.2	5.25	6.06667	0.333333	0	0.272727	0	0.142857	0.368421	0.470588	0.666667	0.666667	0.4
98	11	7	0	1	1	4	1	4	5	5		12	8	1	1	1	6	3	5	10	8		10.8	10.1538	11.0769	11.0769	10	9.6	10.5882	8.72727	9.6	6.22222	7.11111	7.11111	6.28571	5.81818	6.76923	5.33333	6	0.5	0.5	0.571429	0.25	0.666667	0.454545	0.555556	1	0.714286	0.5
100	0	1	1	0	0	1	0	1	3	1		1	1	1	0	0	2	2	1	5	3		0.5	0.5	0	0	0.333333	0	0.5	0.5	0.25	1	1	1	0.666667	0.333333	1	0.666667	0.5	1	1	0.666667	0.333333	1	0.666667	0.5	0	0	0
102	0	0	0	0	0	1	2	0	1	0		0	0	0	0	0	1	2	0	2	1		0	0	0	0	0	0	0	0	0	0	0	0	0	0	0	0	0	0	0	0	0	0	0	0	0	0	0
105	0	0	0	0	0	0	0	0	1	1		0	0	0	0	0	0	0	0	1	1		0	0	0	0	0	0	0	0	0	0	0	0	0	0	0	0	0	0	0	0	0	0	0	0	0	0	0
105	0	0	0	0	0	0	0	0	0	0		0	0	0	0	0	0	0	0	0	0		0	0	0	0	0	0	0	0	0	0	0	0	0	0	0	0	0	0	0	0	0	0	0	0	0	0	0
105	0	0	0	0	0	0	0	0	0	0		0	0	0	0	0	0	0	0	0	0		0	0	0	0	0	0	0	0	0	0	0	0	0	0	0	0	0	0	0	0	0	0	0	0	0	0	0
105	0	0	0	0	0	0	0	0	0	0		0	0	0	0	0	0	0	0	0	0		0	0	0	0	0	0	0	0	0	0	0	0	0	0	0	0	0	0	0	0	0	0	0	0	0	0	0
105	0	0	0	0	0	0	0	0	0	0		0	0	0	0	0	0	0	0	0	0		0	0	0	0	0	0	0	0	0	0	0	0	0	0	0	0	0	0	0	0	0	0	0	0	0	0	0
105	0	0	0	0	0	0	0	0	0	0		0	0	0	0	0	0	0	0	0	0		0	0	0	0	0	0	0	0	0	0	0	0	0	0	0	0	0	0	0	0	0	0	0	0	0	0	0
105	0	0	0	0	0	0	0	0	0	0		0	0	0	0	0	0	0	0	0	0		0	0	0	0	0	0	0	0	0	0	0	0	0	0	0	0	0	0	0	0	0	0	0	0	0	0	0
105	0	0	0	0	0	0	0	0	0	0		0	0	0	0	0	0	0	0	0	0		0	0	0	0	0	0	0	0	0	0	0	0	0	0	0	0	0	0	0	0	0	0	0	0	0	0	0
105	0	0	0	0	0	0	0	0	0	0		0	0	0	0	0	0	0	0	0	0		0	0	0	0	0	0	0	0	0	0	0	0	0	0	0	0	0	0	0	0	0	0	0	0	0	0	0
105	0	0	0	0	0	0	0	0	0	0		0	0	0	0	0	0	0	0	0	0		0	0	0	0	0	0	0	0	0	0	0	0	0	0	0	0	0	0	0	0	0	0	0	0	0	0	0
105	0	0	0	0	0	0	0	0	0	0		0	0	0	0	0	0	0	0	0	0		0	0	0	0	0	0	0	0	0	0	0	0	0	0	0	0	0	0	0	0	0	0	0	0	0	0	0
105	0	0	0	0	0	0	0	0	0	0		0	0	0	0	0	0	0	0	0	0		0	0	0	0	0	0	0	0	0	0	0	0	0	0	0	0	0	0	0	0	0	0	0	0	0	0	0
105	0	0	0	0	0	0	0	0	0	0		0	0	0	0	0	0	0	0	0	0		0	0	0	0	0	0	0	0	0	0	0	0	0	0	0	0	0	0	0	0	0	0	0	0	0	0	0
105	0	0	0	0	0	0	0	0	0	0		0	0	0	0	0	0	0	0	0	0		0	0	0	0	0	0	0	0	0	0	0	0	0	0	0	0	0	0	0	0	0	0	0	0	0	0	0
105	0	0	0	0	0	0	0	0	0	0		0	0	0	0	0	0	0	0	0	0		0	0	0	0	0	0	0	0	0	0	0	0	0	0	0	0	0	0	0	0	0	0	0	0	0	0	0
105	0	0	0	0	0	0	0	0	0	0		0	0	0	0	0	0	0	0	0	0		0	0	0	0	0	0	0	0	0	0	0	0	0	0	0	0	0	0	0	0	0	0	0	0	0	0	0
105	0	0	0	0	0	0	0	0	0	0		0	0	0	0	0	0	0	0	0	0		0	0	0	0	0	0	0	0	0	0	0	0	0	0	0	0	0	0	0	0	0	0	0	0	0	0	0
105	0	0	0	0	0	0	0	0	0	0		0	0	0	0	0	0	0	0	0	0		0	0	0	0	0	0	0	0	0	0	0	0	0	0	0	0	0	0	0	0	0	0	0	0	0	0	0
105	0	0	0	0	0	0	0	0	0	0		0	0	0	0	0	0	0	0	0	0		0	0	0	0	0	0	0	0	0	0	0	0	0	0	0	0	0	0	0	0	0	0	0	0	0	0	0
105	0	0	0	0	0	0	0	0	0	0		0	0	0	0	0	0	0	0	0	0		0	0	0	0	0	0	0	0	0	0	0	0	0	0	0	0	0	0	0	0	0	0	0	0	0	0	0
105	0	0	0	0	0	0	0	0	0	0		0	0	0	0	0	0	0	0	0	0		0	0	0	0	0	0	0	0	0	0	0	0	0	0	0	0	0	0	0	0	0	0	0	0	0	0	0
105	0	0	0	0	0	0	0	0	0	0		0	0	0	0	0	0	0	0	0	0		0	0	0	0	0	0	0	0	0	0	0	0	0	0	0	0	0	0	0	0	0	0	0	0	0	0	0
105	0	0	0	0	0	0	0	0	0	0		0	0	0	0	0	0	0	0	0	0		0	0	0	0	0	0	0	0	0	0	0	0	0	0	0	0	0	0	0	0	0	0	0	0	0	0	0
105	0	0	0	0	0	0	0	0	0	0		0	0	0	0	0	0	0	0	0	0		0	0	0	0	0	0	0	0	0	0	0	0	0	0	0	0	0	0	0	0	0	0	0	0	0	0	0
105	0	0	0	0	0	0	0	0	0	0		0	0	0	0	0	0	0	0	0	0		0	0	0	0	0	0	0	0	0	0	0	0	0	0	0	0	0	0	0	0	0	0	0	0	0	0	0
105	0	0	0	0	0	0	0	0	0	0		0	0	0	0	0	0	0	0	0	0		0	0	0	0	0	0	0	0	0	0	0	0	0	0	0	0	0	0	0	0	0	0	0	0	0	0	0
105	0	0	0	0	0	0	0	0	0	0		0	0	0	0	0	0	0	0	0	0		0	0	0	0	0	0	0	0	0	0	0	0	0	0	0	0	0	0	0	0	0	0	0	0	0	0	0
105	0	0	0	0	0	0	0	0	0	0		0	0	0	0	0	0	0	0	0	0		0	0	0	0	0	0	0	0	0	0	0	0	0	0	0	0	0	0	0	0	0	0	0	0	0	0	0
105	0	0	0	0	0	0	0	0	0	0		0	0	0	0	0	0	0	0	0	0		0	0	0	0	0	0	0	0	0	0	0	0	0	0	0	0	0	0	0	0	0	0	0	0	0	0	0
105	0	0	0	0	0	0	0	0	0	0		0	0	0	0	0	0	0	0	0	0		0	0	0	0	0	0	0	0	0	0	0	0	0	0	0	0	0	0	0	0	0	0	0	0	0	0	0
105	0	0	0	0	0	0	0	0	0	0		0	0	0	0	0	0	0	0	0	0		0	0	0	0	0	0	0	0	0	0	0	0	0	0	0	0	0	0	0	0	0	0	0	0	0	0	0
sum	144	143	110	131	134	122	100	90	147	150													138.793	190.636	197.463	198.274	160.534	185.493	158.398	138.634	160.445	193.11	200.393	201.855	164.024	184.426	160.783	143.723	164.023	112.666	115.862	81.143	112.32	84.5106	61.7011	79.4565	135.149	97.4229	130.51
censors
day	UASInRDN RU-	UASINR DN RU+	UAS INR Active RU -	UAS INR Active RU+	UAS INR RU-	UAS INR RU+	W1118 RU-	W1118 RU+	UAS Odd RU-	UAS Odd RU+
0	0	0	0	0	0	0	0	0	0	0
2	0	1	0	0	0	0	1	0	0	0
4	0	0	0	0	0	0	0	0	0	0
7	0	0	0	0	0	0	0	0	0	0
9	0	0	4	0	0	0	0	0	0	0
11	0	0	0	0	0	0	0	0	0	0
14	0	0	0	0	0	0	0	0	0	0
16	0	0	0	0	0	1	0	0	0	0
18	0	0	0	0	0	1	0	10	0	0
21	0	0	0	0	0	0	0	1	0	0
23	0	0	0	0	1	0	0	0	0	0
25	0	0	0	0	0	2	0	0	0	0
28	0	0	0	0	3	0	0	0	0	0
30	3	0	0	1	2	0	0	0	0	0
32	0	0	0	0	0	0	0	0	0	0
35	0	0	0	1	0	0	0	0	1	0
37	0	0	0	0	0	0	0	0	0	0
39	0	0	0	0	0	0	1	0	0	0
42	0	0	0	0	0	0	0	0	0	0
44	0	0	0	0	0	0	0	0	1	0
46	0	0	0	0	0	0	0	0	0	0
49	0	0	2	1	4	0	0	0	0	0
51	0	0	0	0	0	0	0	0	0	0
53	0	0	0	0	2	0	0	0	0	0
56	0	0	0	0	0	10	0	0	0	0
58	0	1	0	4	0	2	0	0	0	0
60	0	0	0	0	0	0	0	0	0	0
63	0	1	2	0	1	1	0	0	0	0
65	0	0	0	2	0	1	0	0	0	0
67	0	0	0	0	0	0	0	0	0	0
70	0	0	1	2	1	0	2	0	0	0
72	0	0	0	1	1	0	1	0	0	0
74	0	0	0	1	2	0	1	2	0	0
77	1	0	0	0	0	1	0	1	0	0
79	1	0	0	0	0	1	0	0	0	0
81	0	0	0	0	0	1	0	0	0	0
84	0	0	0	0	0	0	1	0	0	0
86	0	0	0	0	1	2	0	0	0	0
88	0	0	0	0	0	0	0	0	0	0
91	0	0	0	1	0	1	0	0	1	1
93	0	0	0	0	0	0	0	0	0	1
95	0	1	0	0	0	1	0	0	1	0
98	0	0	0	0	0	0	0	0	0	0
100	1	0	0	0	0	0	0	0	0	1
102	0	0	0	0	0	0	0	0	0	0
105	0	0	0	0	0	0	0	0	0	0
105	0	0	0	0	0	0	0	0	0	0
105	0	0	0	0	0	0	0	0	0	0
105	0	0	0	0	0	0	0	0	0	0
105	0	0	0	0	0	0	0	0	0	0
105	0	0	0	0	0	0	0	0	0	0
105	0	0	0	0	0	0	0	0	0	0
105	0	0	0	0	0	0	0	0	0	0
105	0	0	0	0	0	0	0	0	0	0
105	0	0	0	0	0	0	0	0	0	0
105	0	0	0	0	0	0	0	0	0	0
105	0	0	0	0	0	0	0	0	0	0
105	0	0	0	0	0	0	0	0	0	0
105	0	0	0	0	0	0	0	0	0	0
105	0	0	0	0	0	0	0	0	0	0
105	0	0	0	0	0	0	0	0	0	0
105	0	0	0	0	0	0	0	0	0	0
105	0	0	0	0	0	0	0	0	0	0
105	0	0	0	0	0	0	0	0	0	0
105	0	0	0	0	0	0	0	0	0	0
105	0	0	0	0	0	0	0	0	0	0
105	0	0	0	0	0	0	0	0	0	0
105	0	0	0	0	0	0	0	0	0	0
105	0	0	0	0	0	0	0	0	0	0
105	0	0	0	0	0	0	0	0	0	0
105	0	0	0	0	0	0	0	0	0	0
105	0	0	0	0	0	0	0	0	0	0
105	0	0	0	0	0	0	0	0	0	0
105	0	0	0	0	0	0	0	0	0	0
105	0	0	0	0	0	0	0	0	0	0
105	0	0	0	0	0	0	0	0	0	0
[truncated: 63 more columns]

## Sheet: mort data
					deaths
																Nx	number of survivors											proportion of survivors												Ux	negative log of proportion of daily survivors
	count			day	UASInRDN RU-	UASINR DN RU+	UAS INR Active RU -	UAS INR Active RU+	UAS INR RU-	UAS INR RU+	W1118 RU-	W1118 RU+	UAS Odd RU-	UAS Odd RU+		day	UASInRDN RU-	UASINR DN RU+	UAS INR Active RU -	UAS INR Active RU+	UAS INR RU-	UAS INR RU+	W1118 RU-	W1118 RU+	UAS Odd RU-	UAS Odd RU+		day	UASInRDN RU-	UASINR DN RU+	UAS INR Active RU -	UAS INR Active RU+	UAS INR RU-	UAS INR RU+	W1118 RU-	W1118 RU+	UAS Odd RU-	UAS Odd RU+		day	UASInRDN RU-	UASINR DN RU+	UAS INR Active RU -	UAS INR Active RU+	UAS INR RU-	UAS INR RU+	W1118 RU-	W1118 RU+	UAS Odd RU-
	date	time														est 0	150	147	119	145	150	150	107	104	151	153
0	2018-01-29	1899-12-31 12:00:00		0													150	147	119	145	152	147	107	104	151	153		0	1	1	1	1	1	1	1	1	1	1		0	0	0	0	0	0	0	0	0	0
1	2018-01-31	1899-12-31 12:00:00		2	0	0	0	0	0	0	0	0	0	0		2	150	146	119	145	150	150	106	104	151	153		2	1	1	1	1	1	1	1	1	1	1		2	0	0	0	0	0	0	0	0	0
2	2018-02-02	1899-12-31 12:00:00		4	0	0	0	0	0	0	0	0	0	0		4	150	146	119	145	150	150	106	104	151	153		4	1	1	1	1	1	1	1	1	1	1		4	0	0	0	0	0	0	0	0	0
3	2018-02-05	1899-12-31 12:00:00		7	0	0	0	0	0	0	0	0	0	0		7	150	146	119	145	150	150	106	104	151	153		7	1	1	1	1	1	1	1	1	1	1		7	0	0	0	0	0	0	0	0	0
4	2018-02-07	1899-12-31 12:00:00		9	0	0	0	0	0	0	0	0	0	0		9	150	146	115	145	150	150	106	104	151	153		9	1	1	1	1	1	1	1	1	1	1		9	0	0	0	0	0	0	0	0	0
5	2018-02-09	1899-12-31 12:00:00		11	0	0	0	0	0	1	1	0	0	0		11	150	146	115	145	150	149	105	104	151	153		11	1	1	1	1	1	0.993333	0.990566	1	1	1		11	0	0	0	0	0	0.00668899	0.00947874	0	0
6	2018-02-12	1899-12-31 12:00:00		14	0	0	0	0	0	3	0	0	0	0		14	150	146	115	145	150	146	105	104	151	153		14	1	1	1	1	1	0.973333	0.990566	1	1	1		14	0	0	0	0	0	0.0203397	0	0	0
7	2018-02-14	1899-12-31 12:00:00		16	1	0	0	0	0	1	2	0	0	0		16	149	146	115	145	150	144	103	104	151	153		16	0.993333	1	1	1	1	0.966667	0.971698	1	1	1		16	0.00668899	0	0	0	0	0.00687288	0.0192314	0	0
8	2018-02-16	1899-12-31 12:00:00		18	0	0	0	0	0	0	0	0	0	0		18	149	146	115	145	150	143	103	94	151	153		18	0.993333	1	1	1	1	0.966667	0.971698	1	1	1		18	0	0	0	0	0	0	0	0	0
9	2018-02-19	1899-12-31 12:00:00		21	0	0	0	0	0	1	1	0	0	0		21	149	146	115	145	150	142	102	93	151	153		21	0.993333	1	1	1	1	0.959907	0.962264	1	1	1		21	0	0	0	0	0	0.00701757	0.00975617	0	0
10	2018-02-21	1899-12-31 12:00:00		23	0	0	0	0	0	1	0	0	0	0		23	149	146	115	145	149	141	102	93	151	153		23	0.993333	1	1	1	1	0.953147	0.962264	1	1	1		23	0	0	0	0	0	0.00706717	0	0	0
11	2018-02-23	1899-12-31 12:00:00		25	0	0	0	0	1	0	0	0	0	0		25	149	146	115	145	148	139	102	93	151	153		25	0.993333	1	1	1	0.993289	0.953147	0.962264	1	1	1		25	0	0	0	0	0.00673403	0	0	0	0
12	2018-02-26	1899-12-31 12:00:00		28	0	0	0	0	0	1	0	0	0	0		28	149	146	115	145	145	138	102	93	151	153		28	0.993333	1	1	1	0.993289	0.94629	0.962264	1	1	1		28	0	0	0	0	0	0.00722025	0	0	0
13	2018-02-28	1899-12-31 12:00:00		30	0	1	0	0	0	0	0	0	0	1		30	146	145	115	144	143	138	102	93	151	152		30	0.993333	0.993151	1	1	0.993289	0.94629	0.962264	1	1	0.993464		30	0	0.00687288	0	0	0	0	0	0	0
14	2018-03-02	1899-12-31 12:00:00		32	0	0	0	0	0	0	0	0	0	0		32	146	145	115	144	143	138	102	93	151	152		32	0.993333	0.993151	1	1	0.993289	0.94629	0.962264	1	1	0.993464		32	0	0	0	0	0	0	0	0	0
15	2018-03-05	1899-12-31 12:00:00		35	0	1	0	1	0	0	0	0	0	0		35	146	144	115	142	143	138	102	93	150	152		35	0.993333	0.986301	1	0.993056	0.993289	0.94629	0.962264	1	1	0.993464		35	0	0.00692044	0	0.00696867	0	0	0	0	0
16	2018-03-07	1899-12-31 12:00:00		37	0	0	0	0	1	0	0	0	0	1		37	146	144	115	142	142	138	102	93	150	151		37	0.993333	0.986301	1	0.993056	0.986343	0.94629	0.962264	1	1	0.986928		37	0	0	0	0	0.00701757	0	0	0	0
17	2018-03-09	1899-12-31 12:00:00		39	0	1	0	0	0	0	0	0	1	0		39	146	143	115	142	142	138	101	93	149	151		39	0.993333	0.979452	1	0.993056	0.986343	0.94629	0.962264	1	0.993333	0.986928		39	0	0.00696867	0	0	0	0	0	0	0.00668899
18	2018-03-12	1899-12-31 12:00:00		42	0	1	0	0	0	0	0	0	0	0		42	146	142	115	142	142	138	101	93	149	151		42	0.993333	0.972603	1	0.993056	0.986343	0.94629	0.962264	1	0.993333	0.986928		42	0	0.00701757	0	0	0	0	0	0	0
19	2018-03-14	1899-12-31 12:00:00		44	0	0	0	0	0	0	0	0	0	0		44	146	142	115	142	142	138	101	93	148	151		44	0.993333	0.972603	1	0.993056	0.986343	0.94629	0.962264	1	0.993333	0.986928		44	0	0	0	0	0	0	0	0	0
20	2018-03-16	1899-12-31 12:00:00		46	0	0	0	1	0	0	0	1	0	1		46	146	142	115	141	142	138	101	92	148	150		46	0.993333	0.972603	1	0.986062	0.986343	0.94629	0.962264	0.989247	0.993333	0.980392		46	0	0	0	0.00706717	0	0	0	0.0108109	0
21	2018-03-19	1899-12-31 12:00:00		49	0	0	0	1	1	0	0	0	1	0		49	146	142	113	139	137	138	101	92	147	150		49	0.993333	0.972603	1	0.979069	0.979396	0.94629	0.962264	0.989247	0.986622	0.980392		49	0	0	0	0.00711747	0.00706717	0	0	0	0.00677969
22	2018-03-21	1899-12-31 12:00:00		51	0	1	0	0	0	0	0	0	0	1		51	146	141	113	139	137	138	101	92	147	149		51	0.993333	0.965753	1	0.979069	0.979396	0.94629	0.962264	0.989247	0.986622	0.973856		51	0	0.00706717	0	0	0	0	0	0	0
23	2018-03-23	1899-12-31 12:00:00		53	0	0	0	1	0	0	2	2	1	0		53	146	141	113	138	135	138	99	90	146	149		53	0.993333	0.965753	1	0.972025	0.979396	0.94629	0.943209	0.967742	0.97991	0.973856		53	0	0	0	0.00722025	0	0	0.0200007	0.0219789	0.00682597
24	2018-03-26	1899-12-31 12:00:00		56	0	0	0	2	4	2	0	0	1	4		56	146	141	113	136	131	126	99	90	145	145		56	0.993333	0.965753	1	0.957938	0.950377	0.932575	0.943209	0.967742	0.973198	0.947712		56	0	0	0	0.0145988	0.0300775	0.0145988	0	0	0.00687288
25	2018-03-28	1899-12-31 12:00:00		58	0	1	0	3	1	0	0	1	2	2		58	146	139	113	129	130	124	99	89	143	143		58	0.993333	0.958904	1	0.936807	0.943123	0.932575	0.943209	0.956989	0.959775	0.934641		58	0	0.00711747	0	0.0223058	0.00766287	0	0	0.0111733	0.0138891
26	2018-03-30	1899-12-31 12:00:00		60	0	0	1	0	1	0	4	1	0	0		60	146	139	112	129	129	124	95	88	143	143		60	0.993333	0.958904	0.99115	0.936807	0.935868	0.932575	0.9051	0.946237	0.959775	0.934641		60	0	0	0.00888895	0	0.00772205	0	0.041243	0.0112996	0
27	2018-04-02	1899-12-31 12:00:00		63	1	1	20	16	51	6	3	2	2	9		63	145	137	90	113	77	117	92	86	141	134		63	0.98653	0.952006	0.814159	0.820614	0.565874	0.887451	0.876518	0.924731	0.946351	0.875817		63	0.00687288	0.00722025	0.19671	0.132425	0.503104	0.0495969	0.0320883	0.0229895	0.0140847
28	2018-04-04	1899-12-31 12:00:00		65	3	2	3	1	1	3	0	1	0	3		65	142	135	87	110	76	113	92	85	141	131		65	0.966119	0.938108	0.787021	0.813352	0.558524	0.864696	0.876518	0.913978	0.946351	0.856209		65	0.0209067	0.0147061	0.0339016	0.00888895	0.0130721	0.0259755	0	0.011696	0
29	2018-04-06	1899-12-31 12:00:00		67	1	2	0	8	1	0	6	0	0	0		67	141	133	87	102	75	113	86	85	141	131		67	0.959315	0.92421	0.787021	0.754199	0.551175	0.864696	0.819354	0.913978	0.946351	0.856209		67	0.00706717	0.0149257	0	0.0755076	0.0132452	0	0.0674413	0	0
30	2018-04-09	1899-12-31 12:00:00		70	3	2	15	26	5	12	24	10	6	14		70	138	131	71	74	69	101	60	75	135	117		70	0.938904	0.910312	0.651327	0.561952	0.51443	0.772869	0.590697	0.806452	0.906081	0.764706		70	0.0215062	0.0151518	0.189242	0.294239	0.0689929	0.112267	0.327213	0.125163	0.0434851
31	2018-04-11	1899-12-31 12:00:00		72	5	3	5	5	3	4	6	4	1	9		72	133	128	66	68	65	97	53	71	134	108		72	0.904886	0.889465	0.605459	0.523982	0.492064	0.742261	0.531627	0.763441	0.899369	0.705882		72	0.0369046	0.0231671	0.0730251	0.0699586	0.0444518	0.0404095	0.105361	0.0548082	0.00743498
32	2018-04-13	1899-12-31 12:00:00		74	1	4	3	2	2	5	11	1	2	2		74	132	124	63	65	61	92	41	68	132	106		74	0.898082	0.861669	0.577938	0.508571	0.476923	0.704	0.421289	0.752688	0.885946	0.69281		74	0.00754721	0.0317487	0.04652	0.029853	0.0312525	0.0529224	0.232622	0.0141846	0.0150379
33	2018-04-16	1899-12-31 12:00:00		77	17	8	29	18	15	10	16	14	15	15		77	114	116	34	47	46	81	25	53	117	91		77	0.78242	0.806078	0.311903	0.367736	0.359647	0.627478	0.256884	0.597723	0.78527	0.594771		77	0.13787	0.0666914	0.616774	0.32424	0.282232	0.115069	0.494696	0.230524	0.120628
34	2018-04-18	1899-12-31 12:00:00		79	8	5	3	14	7	12	4	6	7	6		79	105	111	31	33	39	68	21	47	110	85		79	0.727513	0.771333	0.284382	0.258198	0.304918	0.534518	0.215782	0.530056	0.738288	0.555556		79	0.0727594	0.04406	0.0923733	0.35364	0.16508	0.160343	0.174353	0.120144	0.0616936
35	2018-04-20	1899-12-31 12:00:00		81	14	6	6	4	9	3	3	4	9	7		81	91	105	25	29	30	64	18	43	101	78		81	0.630512	0.729639	0.229341	0.226901	0.234553	0.510937	0.184956	0.484945	0.677883	0.509804		81	0.143101	0.0555699	0.215111	0.129212	0.262364	0.0451204	0.154151	0.0889475	0.0853598
36	2018-04-23	1899-12-31 12:00:00		84	25	15	13	13	16	14	8	14	21	26		84	66	90	12	16	14	50	9	29	80	52		84	0.457294	0.625405	0.110084	0.125187	0.109458	0.399169	0.102754	0.327056	0.536937	0.339869		84	0.321205	0.154151	0.733969	0.594707	0.76214	0.24686	0.587787	0.393904	0.233094
37	2018-04-25	1899-12-31 12:00:00		86	9	17	3	5	5	12	1	2	12	9		86	57	73	9	11	8	36	8	27	68	43		86	0.394936	0.507273	0.0825626	0.0860659	0.0703658	0.303369	0.0913365	0.3045	0.456396	0.281046		86	0.146603	0.20935	0.287682	0.374693	0.441833	0.274437	0.117783	0.071459	0.162519
38	2018-04-27	1899-12-31 12:00:00		88	15	18	1	2	3	9	0	5	9	5		88	42	55	8	9	5	27	8	22	59	38		88	0.291005	0.382192	0.073389	0.0704175	0.0439786	0.227527	0.0913365	0.248111	0.395991	0.248366		88	0.305382	0.283126	0.117783	0.200671	0.470004	0.287682	0	0.204794	0.14197
39	2018-04-30	1899-12-31 12:00:00		91	11	19	7	6	5	7	0	10	32	16		91	31	36	1	2	0	19	8	12	26	21		91	0.21479	0.250162	0.00917363	0.0234725	0	0.168538	0.0913365	0.135334	0.181216	0.143791		91	0.303682	0.423814	2.07944	1.09861	#NUM!	0.300105	0	0.606136	0.781701
40	2018-05-02	1899-12-31 12:00:00		93	9	22	0	0	1	6	5	6	8	4		93	22	14	1	2	-1	13	3	6	18	16		93	0.152431	0.0972852	0.00917363	0.0234725	#DIV/0!	0.115316	0.0342512	0.0676668	0.125457	0.116402		93	0.342945	0.944462	0	0	#DIV/0!	0.37949	0.980829	0.693147	0.367725
41	2018-05-04	1899-12-31 12:00:00		95	10	5	0	1	0	3	0	1	7	8		95	12	8	1	1	-1	9	3	5	10	8		95	0.0831444	0.0625405	0.00917363	0.0117363	#DIV/0!	0.0887043	0.0342512	0.056389	0.0766684	0.0582011		95	0.606136	0.441833	0	0.693147	0	0.262364	0	0.182322	0.492476
42	2018-05-07	1899-12-31 12:00:00		98	11	7	0	1	1	4	1	4	5	5		98	1	1	1	0	-2	5	2	1	5	3		98	0.0069287	0.00781756	0.00917363	0	#DIV/0!	0.0492802	0.0228341	0.0112778	0.0383342	0.0218254		98	2.48491	2.07944	0	#NUM!	-0.693147	0.587787	0.405465	1.60944	0.693147
43	2018-05-09	1899-12-31 12:00:00		100	0	1	1	0	0	1	0	1	3	1		100	0	0	0	0	-2	4	2	0	2	1		100	0.0069287	0	0	#DIV/0!	#DIV/0!	0.0394241	0.0228341	0	0.0153337	0.0145503		100	0	#NUM!	#NUM!	#DIV/0!	0	0.223144	0	#NUM!	0.916291
44	2018-05-11	1899-12-31 12:00:00		102	0	0	0	0	0	1	2	0	1	0		102	0	0	0	0	-2	3	0	0	1	1		102	#DIV/0!	#DIV/0!	#DIV/0!	#DIV/0!	#DIV/0!	0.0295681	0	#DIV/0!	0.00766684	0.0145503		102	#DIV/0!	#DIV/0!	#DIV/0!	#DIV/0!	0	0.287682	#NUM!	#DIV/0!	0.693147
45	2018-05-14	1899-12-31 12:00:00		105	0	0	0	0	0	0	0	0	1	1		105	0	0	0	0	-2	3	0	0	0	0		105	#DIV/0!	#DIV/0!	#DIV/0!	#DIV/0!	#DIV/0!	0.0295681	#DIV/0!	#DIV/0!	0	0		105	#DIV/0!	#DIV/0!	#DIV/0!	#DIV/0!	0	0	#DIV/0!	#DIV/0!	#NUM!
46	2000-01-01	1899-12-31 12:00:00		105	0	0	0	0	0	0	0	0	0	0		105	0	0	0	0	-2	3	0	0	0	0		105	#DIV/0!	#DIV/0!	#DIV/0!	#DIV/0!	#DIV/0!	0.0295681	#DIV/0!	#DIV/0!	#DIV/0!	#DIV/0!		105	#DIV/0!	#DIV/0!	#DIV/0!	#DIV/0!	0	0	#DIV/0!	#DIV/0!	#DIV/0!
47	2000-01-01	1899-12-31 12:00:00		105	0	0	0	0	0	0	0	0	0	0		105	0	0	0	0	-2	3	0	0	0	0		105	#DIV/0!	#DIV/0!	#DIV/0!	#DIV/0!	#DIV/0!	0.0295681	#DIV/0!	#DIV/0!	#DIV/0!	#DIV/0!		105	#DIV/0!	#DIV/0!	#DIV/0!	#DIV/0!	0	0	#DIV/0!	#DIV/0!	#DIV/0!
48	2000-01-01	1899-12-31 12:00:00		105	0	0	0	0	0	0	0	0	0	0		105	0	0	0	0	-2	3	0	0	0	0		105	#DIV/0!	#DIV/0!	#DIV/0!	#DIV/0!	#DIV/0!	0.0295681	#DIV/0!	#DIV/0!	#DIV/0!	#DIV/0!		105	#DIV/0!	#DIV/0!	#DIV/0!	#DIV/0!	0	0	#DIV/0!	#DIV/0!	#DIV/0!
49	2000-01-01	1899-12-31 12:00:00		105	0	0	0	0	0	0	0	0	0	0		105	0	0	0	0	-2	3	0	0	0	0		105	#DIV/0!	#DIV/0!	#DIV/0!	#DIV/0!	#DIV/0!	0.0295681	#DIV/0!	#DIV/0!	#DIV/0!	#DIV/0!		105	#DIV/0!	#DIV/0!	#DIV/0!	#DIV/0!	0	0	#DIV/0!	#DIV/0!	#DIV/0!
50	2000-01-01	1899-12-31 12:00:00		105	0	0	0	0	0	0	0	0	0	0		105	0	0	0	0	-2	3	0	0	0	0		105	#DIV/0!	#DIV/0!	#DIV/0!	#DIV/0!	#DIV/0!	0.0295681	#DIV/0!	#DIV/0!	#DIV/0!	#DIV/0!		105	#DIV/0!	#DIV/0!	#DIV/0!	#DIV/0!	0	0	#DIV/0!	#DIV/0!	#DIV/0!
51	2000-01-01	1899-12-31 12:00:00		105	0	0	0	0	0	0	0	0	0	0		105	0	0	0	0	-2	3	0	0	0	0		105	#DIV/0!	#DIV/0!	#DIV/0!	#DIV/0!	#DIV/0!	0.0295681	#DIV/0!	#DIV/0!	#DIV/0!	#DIV/0!		105	#DIV/0!	#DIV/0!	#DIV/0!	#DIV/0!	0	0	#DIV/0!	#DIV/0!	#DIV/0!
52	2000-01-01	1899-12-31 12:00:00		105	0	0	0	0	0	0	0	0	0	0		105	0	0	0	0	-2	3	0	0	0	0		105	#DIV/0!	#DIV/0!	#DIV/0!	#DIV/0!	#DIV/0!	0.0295681	#DIV/0!	#DIV/0!	#DIV/0!	#DIV/0!		105	#DIV/0!	#DIV/0!	#DIV/0!	#DIV/0!	0	0	#DIV/0!	#DIV/0!	#DIV/0!
53	2000-01-01	1899-12-31 12:00:00		105	0	0	0	0	0	0	0	0	0	0		105	0	0	0	0	-2	3	0	0	0	0		105	#DIV/0!	#DIV/0!	#DIV/0!	#DIV/0!	#DIV/0!	0.0295681	#DIV/0!	#DIV/0!	#DIV/0!	#DIV/0!		105	#DIV/0!	#DIV/0!	#DIV/0!	#DIV/0!	0	0	#DIV/0!	#DIV/0!	#DIV/0!
54	2000-01-01	1899-12-31 12:00:00		105	0	0	0	0	0	0	0	0	0	0		105	0	0	0	0	-2	3	0	0	0	0		105	#DIV/0!	#DIV/0!	#DIV/0!	#DIV/0!	#DIV/0!	0.0295681	#DIV/0!	#DIV/0!	#DIV/0!	#DIV/0!		105	#DIV/0!	#DIV/0!	#DIV/0!	#DIV/0!	0	0	#DIV/0!	#DIV/0!	#DIV/0!
55	2000-01-01	1899-12-31 12:00:00		105	0	0	0	0	0	0	0	0	0	0		105	0	0	0	0	-2	3	0	0	0	0		105	#DIV/0!	#DIV/0!	#DIV/0!	#DIV/0!	#DIV/0!	0.0295681	#DIV/0!	#DIV/0!	#DIV/0!	#DIV/0!		105	#DIV/0!	#DIV/0!	#DIV/0!	#DIV/0!	0	0	#DIV/0!	#DIV/0!	#DIV/0!
56	2000-01-01	1899-12-31 12:00:00		105	0	0	0	0	0	0	0	0	0	0		105	0	0	0	0	-2	3	0	0	0	0		105	#DIV/0!	#DIV/0!	#DIV/0!	#DIV/0!	#DIV/0!	0.0295681	#DIV/0!	#DIV/0!	#DIV/0!	#DIV/0!		105	#DIV/0!	#DIV/0!	#DIV/0!	#DIV/0!	0	0	#DIV/0!	#DIV/0!	#DIV/0!
57	2000-01-01	1899-12-31 12:00:00		105	0	0	0	0	0	0	0	0	0	0		105	0	0	0	0	-2	3	0	0	0	0		105	#DIV/0!	#DIV/0!	#DIV/0!	#DIV/0!	#DIV/0!	0.0295681	#DIV/0!	#DIV/0!	#DIV/0!	#DIV/0!		105	#DIV/0!	#DIV/0!	#DIV/0!	#DIV/0!	0	0	#DIV/0!	#DIV/0!	#DIV/0!
58	2000-01-01	1899-12-31 12:00:00		105	0	0	0	0	0	0	0	0	0	0		105	0	0	0	0	-2	3	0	0	0	0		105	#DIV/0!	#DIV/0!	#DIV/0!	#DIV/0!	#DIV/0!	0.0295681	#DIV/0!	#DIV/0!	#DIV/0!	#DIV/0!		105	#DIV/0!	#DIV/0!	#DIV/0!	#DIV/0!	0	0	#DIV/0!	#DIV/0!	#DIV/0!
59	2000-01-01	1899-12-31 12:00:00		105	0	0	0	0	0	0	0	0	0	0		105	0	0	0	0	-2	3	0	0	0	0		105	#DIV/0!	#DIV/0!	#DIV/0!	#DIV/0!	#DIV/0!	0.0295681	#DIV/0!	#DIV/0!	#DIV/0!	#DIV/0!		105	#DIV/0!	#DIV/0!	#DIV/0!	#DIV/0!	0	0	#DIV/0!	#DIV/0!	#DIV/0!
60	2000-01-01	1899-12-31 12:00:00		105	0	0	0	0	0	0	0	0	0	0		105	0	0	0	0	-2	3	0	0	0	0		105	#DIV/0!	#DIV/0!	#DIV/0!	#DIV/0!	#DIV/0!	0.0295681	#DIV/0!	#DIV/0!	#DIV/0!	#DIV/0!		105	#DIV/0!	#DIV/0!	#DIV/0!	#DIV/0!	0	0	#DIV/0!	#DIV/0!	#DIV/0!
61	2000-01-01	1899-12-31 12:00:00		105	0	0	0	0	0	0	0	0	0	0		105	0	0	0	0	-2	3	0	0	0	0		105	#DIV/0!	#DIV/0!	#DIV/0!	#DIV/0!	#DIV/0!	0.0295681	#DIV/0!	#DIV/0!	#DIV/0!	#DIV/0!		105	#DIV/0!	#DIV/0!	#DIV/0!	#DIV/0!	0	0	#DIV/0!	#DIV/0!	#DIV/0!
62	2000-01-01	1899-12-31 12:00:00		105	0	0	0	0	0	0	0	0	0	0		105	0	0	0	0	-2	3	0	0	0	0		105	#DIV/0!	#DIV/0!	#DIV/0!	#DIV/0!	#DIV/0!	0.0295681	#DIV/0!	#DIV/0!	#DIV/0!	#DIV/0!		105	#DIV/0!	#DIV/0!	#DIV/0!	#DIV/0!	0	0	#DIV/0!	#DIV/0!	#DIV/0!
63	2000-01-01	1899-12-31 12:00:00		105	0	0	0	0	0	0	0	0	0	0		105	0	0	0	0	-2	3	0	0	0	0		105	#DIV/0!	#DIV/0!	#DIV/0!	#DIV/0!	#DIV/0!	0.0295681	#DIV/0!	#DIV/0!	#DIV/0!	#DIV/0!		105	#DIV/0!	#DIV/0!	#DIV/0!	#DIV/0!	0	0	#DIV/0!	#DIV/0!	#DIV/0!
64	2000-01-01	1899-12-31 12:00:00		105	0	0	0	0	0	0	0	0	0	0		105	0	0	0	0	-2	3	0	0	0	0		105	#DIV/0!	#DIV/0!	#DIV/0!	#DIV/0!	#DIV/0!	0.0295681	#DIV/0!	#DIV/0!	#DIV/0!	#DIV/0!		105	#DIV/0!	#DIV/0!	#DIV/0!	#DIV/0!	0	0	#DIV/0!	#DIV/0!	#DIV/0!
65	2000-01-01	1899-12-31 12:00:00		105	0	0	0	0	0	0	0	0	0	0		105	0	0	0	0	-2	3	0	0	0	0		105	#DIV/0!	#DIV/0!	#DIV/0!	#DIV/0!	#DIV/0!	0.0295681	#DIV/0!	#DIV/0!	#DIV/0!	#DIV/0!		105	#DIV/0!	#DIV/0!	#DIV/0!	#DIV/0!	0	0	#DIV/0!	#DIV/0!	#DIV/0!
66	2000-01-01	1899-12-31 12:00:00		105	0	0	0	0	0	0	0	0	0	0		105	0	0	0	0	-2	3	0	0	0	0		105	#DIV/0!	#DIV/0!	#DIV/0!	#DIV/0!	#DIV/0!	0.0295681	#DIV/0!	#DIV/0!	#DIV/0!	#DIV/0!		105	#DIV/0!	#DIV/0!	#DIV/0!	#DIV/0!	0	0	#DIV/0!	#DIV/0!	#DIV/0!
67	2000-01-01	1899-12-31 12:00:00		105	0	0	0	0	0	0	0	0	0	0		105	0	0	0	0	-2	3	0	0	0	0		105	#DIV/0!	#DIV/0!	#DIV/0!	#DIV/0!	#DIV/0!	0.0295681	#DIV/0!	#DIV/0!	#DIV/0!	#DIV/0!		105	#DIV/0!	#DIV/0!	#DIV/0!	#DIV/0!	0	0	#DIV/0!	#DIV/0!	#DIV/0!
68	2000-01-01	1899-12-31 12:00:00		105	0	0	0	0	0	0	0	0	0	0		105	0	0	0	0	-2	3	0	0	0	0		105	#DIV/0!	#DIV/0!	#DIV/0!	#DIV/0!	#DIV/0!	0.0295681	#DIV/0!	#DIV/0!	#DIV/0!	#DIV/0!		105	#DIV/0!	#DIV/0!	#DIV/0!	#DIV/0!	0	0	#DIV/0!	#DIV/0!	#DIV/0!
69	2000-01-01	1899-12-31 12:00:00		105	0	0	0	0	0	0	0	0	0	0		105	0	0	0	0	-2	3	0	0	0	0		105	#DIV/0!	#DIV/0!	#DIV/0!	#DIV/0!	#DIV/0!	0.0295681	#DIV/0!	#DIV/0!	#DIV/0!	#DIV/0!		105	#DIV/0!	#DIV/0!	#DIV/0!	#DIV/0!	0	0	#DIV/0!	#DIV/0!	#DIV/0!
70	2000-01-01	1899-12-31 12:00:00		105	0	0	0	0	0	0	0	0	0	0		105	0	0	0	0	-2	3	0	0	0	0		105	#DIV/0!	#DIV/0!	#DIV/0!	#DIV/0!	#DIV/0!	0.0295681	#DIV/0!	#DIV/0!	#DIV/0!	#DIV/0!		105	#DIV/0!	#DIV/0!	#DIV/0!	#DIV/0!	0	0	#DIV/0!	#DIV/0!	#DIV/0!
71	2000-01-01	1899-12-31 12:00:00		105	0	0	0	0	0	0	0	0	0	0		105	0	0	0	0	-2	3	0	0	0	0		105	#DIV/0!	#DIV/0!	#DIV/0!	#DIV/0!	#DIV/0!	0.0295681	#DIV/0!	#DIV/0!	#DIV/0!	#DIV/0!		105	#DIV/0!	#DIV/0!	#DIV/0!	#DIV/0!	0	0	#DIV/0!	#DIV/0!	#DIV/0!
72	2000-01-01	1899-12-31 12:00:00		105	0	0	0	0	0	0	0	0	0	0		105	0	0	0	0	-2	3	0	0	0	0		105	#DIV/0!	#DIV/0!	#DIV/0!	#DIV/0!	#DIV/0!	0.0295681	#DIV/0!	#DIV/0!	#DIV/0!	#DIV/0!		105	#DIV/0!	#DIV/0!	#DIV/0!	#DIV/0!	0	0	#DIV/0!	#DIV/0!	#DIV/0!
73	2000-01-01	1899-12-31 12:00:00		105	0	0	0	0	0	0	0	0	0	0		105	0	0	0	0	-2	3	0	0	0	0		105	#DIV/0!	#DIV/0!	#DIV/0!	#DIV/0!	#DIV/0!	0.0295681	#DIV/0!	#DIV/0!	#DIV/0!	#DIV/0!		105	#DIV/0!	#DIV/0!	#DIV/0!	#DIV/0!	0	0	#DIV/0!	#DIV/0!	#DIV/0!
74	2000-01-01	1899-12-31 12:00:00		105	0	0	0	0	0	0	0	0	0	0		105	0	0	0	0	-2	3	0	0	0	0		105	#DIV/0!	#DIV/0!	#DIV/0!	#DIV/0!	#DIV/0!	0.0295681	#DIV/0!	#DIV/0!	#DIV/0!	#DIV/0!		105	#DIV/0!	#DIV/0!	#DIV/0!	#DIV/0!	0	0	#DIV/0!	#DIV/0!	#DIV/0!
75	2000-01-01	1899-12-31 12:00:00		105	0	0	0	0	0	0	0	0	0	0		105	0	0	0	0	-2	3	0	0	0	0		105	#DIV/0!	#DIV/0!	#DIV/0!	#DIV/0!	#DIV/0!	0.0295681	#DIV/0!	#DIV/0!	#DIV/0!	#DIV/0!		105	#DIV/0!	#DIV/0!	#DIV/0!	#DIV/0!	0	0	#DIV/0!	#DIV/0!	#DIV/0!
				censors
				day	UASInRDN RU-	UASINR DN RU+	UAS INR Active RU -	UAS INR Active RU+	UAS INR RU-	UAS INR RU+	W1118 RU-	W1118 RU+	UAS Odd RU-	UAS Odd RU+
	2018-01-29	1899-12-31 12:00:00		0	0	0	0	0	0	0	0	0	0	0
1	2018-01-31	1899-12-31 12:00:00		2	0	1	0	0	0	0	1	0	0	0
2	2018-02-02	1899-12-31 12:00:00		4	0	0	0	0	0	0	0	0	0	0
3	2018-02-05	1899-12-31 12:00:00		7	0	0	0	0	0	0	0	0	0	0
4	2018-02-07	1899-12-31 12:00:00		9	0	0	4	0	0	0	0	0	0	0
5	2018-02-09	1899-12-31 12:00:00		11	0	0	0	0	0	0	0	0	0	0
6	2018-02-12	1899-12-31 12:00:00		14	0	0	0	0	0	0	0	0	0	0
7	2018-02-14	1899-12-31 12:00:00		16	0	0	0	0	0	1	0	0	0	0
8	2018-02-16	1899-12-31 12:00:00		18	0	0	0	0	0	1	0	10	0	0
9	2018-02-19	1899-12-31 12:00:00		21	0	0	0	0	0	0	0	1	0	0
10	2018-02-21	1899-12-31 12:00:00		23	0	0	0	0	1	0	0	0	0	0
11	2018-02-23	1899-12-31 12:00:00		25	0	0	0	0	0	2	0	0	0	0
12	2018-02-26	1899-12-31 12:00:00		28	0	0	0	0	3	0	0	0	0	0
13	2018-02-28	1899-12-31 12:00:00		30	3	0	0	1	2	0	0	0	0	0
14	2018-03-02	1899-12-31 12:00:00		32	0	0	0	0	0	0	0	0	0	0
15	2018-03-05	1899-12-31 12:00:00		35	0	0	0	1	0	0	0	0	1	0
16	2018-03-07	1899-12-31 12:00:00		37	0	0	0	0	0	0	0	0	0	0
17	2018-03-09	1899-12-31 12:00:00		39	0	0	0	0	0	0	1	0	0	0
18	2018-03-12	1899-12-31 12:00:00		42	0	0	0	0	0	0	0	0	0	0
19	2018-03-14	1899-12-31 12:00:00		44	0	0	0	0	0	0	0	0	1	0
20	2018-03-16	1899-12-31 12:00:00		46	0	0	0	0	0	0	0	0	0	0
21	2018-03-19	1899-12-31 12:00:00		49	0	0	2	1	4	0	0	0	0	0
22	2018-03-21	1899-12-31 12:00:00		51	0	0	0	0	0	0	0	0	0	0
23	2018-03-23	1899-12-31 12:00:00		53	0	0	0	0	2	0	0	0	0	0
24	2018-03-26	1899-12-31 12:00:00		56	0	0	0	0	0	10	0	0	0	0
25	2018-03-28	1899-12-31 12:00:00		58	0	1	0	4	0	2	0	0	0	0
26	2018-03-30	1899-12-31 12:00:00		60	0	0	0	0	0	0	0	0	0	0
27	2018-04-02	1899-12-31 12:00:00		63	0	1	2	0	1	1	0	0	0	0
28	2018-04-04	1899-12-31 12:00:00		65	0	0	0	2	0	1	0	0	0	0
29	2018-04-06	1899-12-31 12:00:00		67	0	0	0	0	0	0	0	0	0	0
30	2018-04-09	1899-12-31 12:00:00		70	0	0	1	2	1	0	2	0	0	0
31	2018-04-11	1899-12-31 12:00:00		72	0	0	0	1	1	0	1	0	0	0
32	2018-04-13	1899-12-31 12:00:00		74	0	0	0	1	2	0	1	2	0	0
33	2018-04-16	1899-12-31 12:00:00		77	1	0	0	0	0	1	0	1	0	0
34	2018-04-18	1899-12-31 12:00:00		79	1	0	0	0	0	1	0	0	0	0
35	2018-04-20	1899-12-31 12:00:00		81	0	0	0	0	0	1	0	0	0	0
36	2018-04-23	1899-12-31 12:00:00		84	0	0	0	0	0	0	1	0	0	0
37	2018-04-25	1899-12-31 12:00:00		86	0	0	0	0	1	2	0	0	0	0
38	2018-04-27	1899-12-31 12:00:00		88	0	0	0	0	0	0	0	0	0	0
39	2018-04-30	1899-12-31 12:00:00		91	0	0	0	1	0	1	0	0	1	1
40	2018-05-02	1899-12-31 12:00:00		93	0	0	0	0	0	0	0	0	0	1
41	2018-05-04	1899-12-31 12:00:00		95	0	1	0	0	0	1	0	0	1	0
42	2018-05-07	1899-12-31 12:00:00		98	0	0	0	0	0	0	0	0	0	0
43	2018-05-09	1899-12-31 12:00:00		100	1	0	0	0	0	0	0	0	0	1
44	2018-05-11	1899-12-31 12:00:00		102	0	0	0	0	0	0	0	0	0	0
45	2018-05-14	1899-12-31 12:00:00		105	0	0	0	0	0	0	0	0	0	0
46	2000-01-01	1899-12-31 12:00:00		105	0	0	0	0	0	0	0	0	0	0
47	2000-01-01	1899-12-31 12:00:00		105	0	0	0	0	0	0	0	0	0	0
48	2000-01-01	1899-12-31 12:00:00		105	0	0	0	0	0	0	0	0	0	0
49	2000-01-01	1899-12-31 12:00:00		105	0	0	0	0	0	0	0	0	0	0
50	2000-01-01	1899-12-31 12:00:00		105	0	0	0	0	0	0	0	0	0	0
51	2000-01-01	1899-12-31 12:00:00		105	0	0	0	0	0	0	0	0	0	0
52	2000-01-01	1899-12-31 12:00:00		105	0	0	0	0	0	0	0	0	0	0
53	2000-01-01	1899-12-31 12:00:00		105	0	0	0	0	0	0	0	0	0	0
54	2000-01-01	1899-12-31 12:00:00		105	0	0	0	0	0	0	0	0	0	0
55	2000-01-01	1899-12-31 12:00:00		105	0	0	0	0	0	0	0	0	0	0
56	2000-01-01	1899-12-31 12:00:00		105	0	0	0	0	0	0	0	0	0	0
57	2000-01-01	1899-12-31 12:00:00		105	0	0	0	0	0	0	0	0	0	0
58	2000-01-01	1899-12-31 12:00:00		105	0	0	0	0	0	0	0	0	0	0
59	2000-01-01	1899-12-31 12:00:00		105	0	0	0	0	0	0	0	0	0	0
60	2000-01-01	1899-12-31 12:00:00		105	0	0	0	0	0	0	0	0	0	0
61	2000-01-01	1899-12-31 12:00:00		105	0	0	0	0	0	0	0	0	0	0
62	2000-01-01	1899-12-31 12:00:00		105	0	0	0	0	0	0	0	0	0	0
63	2000-01-01	1899-12-31 12:00:00		105	0	0	0	0	0	0	0	0	0	0
64	2000-01-01	1899-12-31 12:00:00		105	0	0	0	0	0	0	0	0	0	0
65	2000-01-01	1899-12-31 12:00:00		105	0	0	0	0	0	0	0	0	0	0
66	2000-01-01	1899-12-31 12:00:00		105	0	0	0	0	0	0	0	0	0	0
67	2000-01-01	1899-12-31 12:00:00		105	0	0	0	0	0	0	0	0	0	0
68	2000-01-01	1899-12-31 12:00:00		105	0	0	0	0	0	0	0	0	0	0
69	2000-01-01	1899-12-31 12:00:00		105	0	0	0	0	0	0	0	0	0	0
70	2000-01-01	1899-12-31 12:00:00		105	0	0	0	0	0	0	0	0	0	0
71	2000-01-01	1899-12-31 12:00:00		105	0	0	0	0	0	0	0	0	0	0
72	2000-01-01	1899-12-31 12:00:00		105	0	0	0	0	0	0	0	0	0	0
73	2000-01-01	1899-12-31 12:00:00		105	0	0	0	0	0	0	0	0	0	0
74	2000-01-01	1899-12-31 12:00:00		105	0	0	0	0	0	0	0	0	0	0
75	2000-01-01	1899-12-31 12:00:00		105	0	0	0	0	0	0	0	0	0	0
[truncated: 84 more columns]

## Sheet: egg data
		treatment start date	2018-01-29																				total eggs laid per ave female
																								food	ave of sum egg production for ave female	error		median LS
	date on food
	time on food																							UASInRDN RU-	#DIV/0!	#DIV/0!		82.5
	date off food																							UASINR DN RU+	#DIV/0!	#DIV/0!		87
	time off food																							UAS INR Active RU -	#DIV/0!	#DIV/0!		75.5
	day		-43129		-43129		-43129		-43129		-43129		-43129		-43129		-43129		-43129		-43129			UAS INR Active RU+	#DIV/0!	#DIV/0!		75.5
	time on food (h)		0		0		0		0		0		0		0		0		0		0			UAS INR RU-	#DIV/0!	#DIV/0!		71
	fraction of 24h		0		0		0		0		0		0		0		0		0		0			UAS INR RU+	#DIV/0!	#DIV/0!		82.5
		flies in		flies in		flies in		flies in		flies in		flies in		flies in		flies in		flies in		flies in				W1118 RU-	#DIV/0!	#DIV/0!		73
UASInRDN RU-		vial		vial		vial		vial		vial		vial		vial		vial		vial		vial				W1118 RU+	#DIV/0!	#DIV/0!		80
	1	#N/A		#N/A		#N/A		#N/A		#N/A		#N/A		#N/A		#N/A		#N/A		#N/A				UAS Odd RU-	#DIV/0!	#DIV/0!		85
	2	#N/A		#N/A		#N/A		#N/A		#N/A		#N/A		#N/A		#N/A		#N/A		#N/A				UAS Odd RU+	#DIV/0!	#DIV/0!		82.5
	3	#N/A		#N/A		#N/A		#N/A		#N/A		#N/A		#N/A		#N/A		#N/A		#N/A
	4	#N/A		#N/A		#N/A		#N/A		#N/A		#N/A		#N/A		#N/A		#N/A		#N/A
	5	#N/A		#N/A		#N/A		#N/A		#N/A		#N/A		#N/A		#N/A		#N/A		#N/A
	6	#N/A		#N/A		#N/A		#N/A		#N/A		#N/A		#N/A		#N/A		#N/A		#N/A
	7	#N/A		#N/A		#N/A		#N/A		#N/A		#N/A		#N/A		#N/A		#N/A		#N/A
	8	#N/A		#N/A		#N/A		#N/A		#N/A		#N/A		#N/A		#N/A		#N/A		#N/A
	9	#N/A		#N/A		#N/A		#N/A		#N/A		#N/A		#N/A		#N/A		#N/A		#N/A
	10	#N/A		#N/A		#N/A		#N/A		#N/A		#N/A		#N/A		#N/A		#N/A		#N/A
eggs per 24 h per female
			#DIV/0!																			sum	#DIV/0!
			#DIV/0!																				#DIV/0!
			#DIV/0!																				#DIV/0!
			#DIV/0!																				#DIV/0!
			#DIV/0!																				#DIV/0!
			#DIV/0!																				#DIV/0!
			#DIV/0!																				#DIV/0!
			#DIV/0!																				#DIV/0!
			#DIV/0!																				#DIV/0!
			#DIV/0!																				#DIV/0!
	average		#DIV/0!																			ave	#DIV/0!
	sd		#DIV/0!																			n	0
	n		0																			sd	#DIV/0!
	se		#DIV/0!																			error	#DIV/0!
UASINR DN RU+
	21	#N/A		#N/A		#N/A		#N/A		#N/A		#N/A		#N/A		#N/A		#N/A		#N/A
	22	#N/A		#N/A		#N/A		#N/A		#N/A		#N/A		#N/A		#N/A		#N/A		#N/A
	23	#N/A		#N/A		#N/A		#N/A		#N/A		#N/A		#N/A		#N/A		#N/A		#N/A
	24	#N/A		#N/A		#N/A		#N/A		#N/A		#N/A		#N/A		#N/A		#N/A		#N/A
	25	#N/A		#N/A		#N/A		#N/A		#N/A		#N/A		#N/A		#N/A		#N/A		#N/A
	26	#N/A		#N/A		#N/A		#N/A		#N/A		#N/A		#N/A		#N/A		#N/A		#N/A
	27	#N/A		#N/A		#N/A		#N/A		#N/A		#N/A		#N/A		#N/A		#N/A		#N/A
	28	#N/A		#N/A		#N/A		#N/A		#N/A		#N/A		#N/A		#N/A		#N/A		#N/A
	29	#N/A		#N/A		#N/A		#N/A		#N/A		#N/A		#N/A		#N/A		#N/A		#N/A
	30	#N/A		#N/A		#N/A		#N/A		#N/A		#N/A		#N/A		#N/A		#N/A		#N/A
eggs per 24 h per female
			#DIV/0!																			sum	#DIV/0!
			#DIV/0!																				#DIV/0!
			#DIV/0!																				#DIV/0!
			#DIV/0!																				#DIV/0!
			#DIV/0!																				#DIV/0!
			#DIV/0!																				#DIV/0!
			#DIV/0!																				#DIV/0!
			#DIV/0!																				#DIV/0!
			#DIV/0!																				#DIV/0!
			#DIV/0!																				#DIV/0!
	average		#DIV/0!																			ave	#DIV/0!
	sd		#DIV/0!																			n	0
	n		0																			sd	#DIV/0!
	se		#DIV/0!																			error	#DIV/0!
UAS INR Active RU -
	41	#N/A		#N/A		#N/A		#N/A		#N/A		#N/A		#N/A		#N/A		#N/A		#N/A
	42	#N/A		#N/A		#N/A		#N/A		#N/A		#N/A		#N/A		#N/A		#N/A		#N/A
	43	#N/A		#N/A		#N/A		#N/A		#N/A		#N/A		#N/A		#N/A		#N/A		#N/A
	44	#N/A		#N/A		#N/A		#N/A		#N/A		#N/A		#N/A		#N/A		#N/A		#N/A
	45	#N/A		#N/A		#N/A		#N/A		#N/A		#N/A		#N/A		#N/A		#N/A		#N/A
	46	#N/A		#N/A		#N/A		#N/A		#N/A		#N/A		#N/A		#N/A		#N/A		#N/A
	47	#N/A		#N/A		#N/A		#N/A		#N/A		#N/A		#N/A		#N/A		#N/A		#N/A
	48	#N/A		#N/A		#N/A		#N/A		#N/A		#N/A		#N/A		#N/A		#N/A		#N/A
	49	#N/A		#N/A		#N/A		#N/A		#N/A		#N/A		#N/A		#N/A		#N/A		#N/A
	50	#N/A		#N/A		#N/A		#N/A		#N/A		#N/A		#N/A		#N/A		#N/A		#N/A
eggs per 24 h per female
			#DIV/0!																			sum	#DIV/0!
			#DIV/0!																				#DIV/0!
			#DIV/0!																				#DIV/0!
			#DIV/0!																				#DIV/0!
			#DIV/0!																				#DIV/0!
			#DIV/0!																				#DIV/0!
			#DIV/0!																				#DIV/0!
			#DIV/0!																				#DIV/0!
			#DIV/0!																				#DIV/0!
			#DIV/0!																				#DIV/0!
	average		#DIV/0!																			ave	#DIV/0!
	sd		#DIV/0!																			n	0
	n		0																			sd	#DIV/0!
	se		#DIV/0!																			error	#DIV/0!
UAS INR Active RU+
	61	#N/A		#N/A		#N/A		#N/A		#N/A		#N/A		#N/A		#N/A		#N/A		#N/A
	62	#N/A		#N/A		#N/A		#N/A		#N/A		#N/A		#N/A		#N/A		#N/A		#N/A
	63	#N/A		#N/A		#N/A		#N/A		#N/A		#N/A		#N/A		#N/A		#N/A		#N/A
	64	#N/A		#N/A		#N/A		#N/A		#N/A		#N/A		#N/A		#N/A		#N/A		#N/A
	65	#N/A		#N/A		#N/A		#N/A		#N/A		#N/A		#N/A		#N/A		#N/A		#N/A
	66	#N/A		#N/A		#N/A		#N/A		#N/A		#N/A		#N/A		#N/A		#N/A		#N/A
	67	#N/A		#N/A		#N/A		#N/A		#N/A		#N/A		#N/A		#N/A		#N/A		#N/A
	68	#N/A		#N/A		#N/A		#N/A		#N/A		#N/A		#N/A		#N/A		#N/A		#N/A
	69	#N/A		#N/A		#N/A		#N/A		#N/A		#N/A		#N/A		#N/A		#N/A		#N/A
	70	#N/A		#N/A		#N/A		#N/A		#N/A		#N/A		#N/A		#N/A		#N/A		#N/A
eggs per 24 h per female
			#DIV/0!																			sum	#DIV/0!
			#DIV/0!																				#DIV/0!
			#DIV/0!																				#DIV/0!
			#DIV/0!																				#DIV/0!
			#DIV/0!																				#DIV/0!
			#DIV/0!																				#DIV/0!
			#DIV/0!																				#DIV/0!
			#DIV/0!																				#DIV/0!
			#DIV/0!																				#DIV/0!
			#DIV/0!																				#DIV/0!
	average		#DIV/0!																			ave	#DIV/0!
	sd		#DIV/0!																			n	0
	n		0																			sd	#DIV/0!
	se		#DIV/0!																			error	#DIV/0!
UAS INR RU-
	81	#N/A		#N/A		#N/A		#N/A		#N/A		#N/A		#N/A		#N/A		#N/A		#N/A
	82	#N/A		#N/A		#N/A		#N/A		#N/A		#N/A		#N/A		#N/A		#N/A		#N/A
	83	#N/A		#N/A		#N/A		#N/A		#N/A		#N/A		#N/A		#N/A		#N/A		#N/A
	84	#N/A		#N/A		#N/A		#N/A		#N/A		#N/A		#N/A		#N/A		#N/A		#N/A
	85	#N/A		#N/A		#N/A		#N/A		#N/A		#N/A		#N/A		#N/A		#N/A		#N/A
	86	#N/A		#N/A		#N/A		#N/A		#N/A		#N/A		#N/A		#N/A		#N/A		#N/A
	87	#N/A		#N/A		#N/A		#N/A		#N/A		#N/A		#N/A		#N/A		#N/A		#N/A
	88	#N/A		#N/A		#N/A		#N/A		#N/A		#N/A		#N/A		#N/A		#N/A		#N/A
	89	#N/A		#N/A		#N/A		#N/A		#N/A		#N/A		#N/A		#N/A		#N/A		#N/A
	90	#N/A		#N/A		#N/A		#N/A		#N/A		#N/A		#N/A		#N/A		#N/A		#N/A
eggs per 24 h per female
			#DIV/0!																			sum	#DIV/0!
			#DIV/0!																				#DIV/0!
			#DIV/0!																				#DIV/0!
			#DIV/0!																				#DIV/0!
			#DIV/0!																				#DIV/0!
			#DIV/0!																				#DIV/0!
			#DIV/0!																				#DIV/0!
			#DIV/0!																				#DIV/0!
			#DIV/0!																				#DIV/0!
			#DIV/0!																				#DIV/0!
	average		#DIV/0!																			ave	#DIV/0!
	sd		#DIV/0!																			n	0
	n		0																			sd	#DIV/0!
	se		#DIV/0!																			error	#DIV/0!
UAS INR RU+
	101	#N/A		#N/A		#N/A		#N/A		#N/A		#N/A		#N/A		#N/A		#N/A		#N/A
	102	#N/A		#N/A		#N/A		#N/A		#N/A		#N/A		#N/A		#N/A		#N/A		#N/A
	103	#N/A		#N/A		#N/A		#N/A		#N/A		#N/A		#N/A		#N/A		#N/A		#N/A
	104	#N/A		#N/A		#N/A		#N/A		#N/A		#N/A		#N/A		#N/A		#N/A		#N/A
	105	#N/A		#N/A		#N/A		#N/A		#N/A		#N/A		#N/A		#N/A		#N/A		#N/A
	106	#N/A		#N/A		#N/A		#N/A		#N/A		#N/A		#N/A		#N/A		#N/A		#N/A
	107	#N/A		#N/A		#N/A		#N/A		#N/A		#N/A		#N/A		#N/A		#N/A		#N/A
	108	#N/A		#N/A		#N/A		#N/A		#N/A		#N/A		#N/A		#N/A		#N/A		#N/A
	109	#N/A		#N/A		#N/A		#N/A		#N/A		#N/A		#N/A		#N/A		#N/A		#N/A
	110	#N/A		#N/A		#N/A		#N/A		#N/A		#N/A		#N/A		#N/A		#N/A		#N/A
eggs per 24 h per female
			#DIV/0!																			sum	#DIV/0!
			#DIV/0!																				#DIV/0!
			#DIV/0!																				#DIV/0!
			#DIV/0!																				#DIV/0!
			#DIV/0!																				#DIV/0!
			#DIV/0!																				#DIV/0!
			#DIV/0!																				#DIV/0!
			#DIV/0!																				#DIV/0!
			#DIV/0!																				#DIV/0!
			#DIV/0!																				#DIV/0!
	average		#DIV/0!																			ave	#DIV/0!
	sd		#DIV/0!																			n	0
	n		0																			sd	#DIV/0!
	se		#DIV/0!																			error	#DIV/0!
W1118 RU-
	121	#N/A		#N/A		#N/A		#N/A		#N/A		#N/A		#N/A		#N/A		#N/A		#N/A
	122	#N/A		#N/A		#N/A		#N/A		#N/A		#N/A		#N/A		#N/A		#N/A		#N/A
	123	#N/A		#N/A		#N/A		#N/A		#N/A		#N/A		#N/A		#N/A		#N/A		#N/A
	124	#N/A		#N/A		#N/A		#N/A		#N/A		#N/A		#N/A		#N/A		#N/A		#N/A
	125	#N/A		#N/A		#N/A		#N/A		#N/A		#N/A		#N/A		#N/A		#N/A		#N/A
	126	#N/A		#N/A		#N/A		#N/A		#N/A		#N/A		#N/A		#N/A		#N/A		#N/A
	127	#N/A		#N/A		#N/A		#N/A		#N/A		#N/A		#N/A		#N/A		#N/A		#N/A
	128	#N/A		#N/A		#N/A		#N/A		#N/A		#N/A		#N/A		#N/A		#N/A		#N/A
	129	#N/A		#N/A		#N/A		#N/A		#N/A		#N/A		#N/A		#N/A		#N/A		#N/A
	130	#N/A		#N/A		#N/A		#N/A		#N/A		#N/A		#N/A		#N/A		#N/A		#N/A
eggs per 24 h per female
			#DIV/0!																			sum	#DIV/0!
			#DIV/0!																				#DIV/0!
			#DIV/0!																				#DIV/0!
			#DIV/0!																				#DIV/0!
			#DIV/0!																				#DIV/0!
			#DIV/0!																				#DIV/0!
			#DIV/0!																				#DIV/0!
			#DIV/0!																				#DIV/0!
			#DIV/0!																				#DIV/0!
			#DIV/0!																				#DIV/0!
	average		#DIV/0!																			ave	#DIV/0!
	sd		#DIV/0!																			n	0
	n		0																			sd	#DIV/0!
	se		#DIV/0!																			error	#DIV/0!
W1118 RU+
	141	#N/A		#N/A		#N/A		#N/A		#N/A		#N/A		#N/A		#N/A		#N/A		#N/A
	142	#N/A		#N/A		#N/A		#N/A		#N/A		#N/A		#N/A		#N/A		#N/A		#N/A
	143	#N/A		#N/A		#N/A		#N/A		#N/A		#N/A		#N/A		#N/A		#N/A		#N/A
	144	#N/A		#N/A		#N/A		#N/A		#N/A		#N/A		#N/A		#N/A		#N/A		#N/A
	145	#N/A		#N/A		#N/A		#N/A		#N/A		#N/A		#N/A		#N/A		#N/A		#N/A
	146	#N/A		#N/A		#N/A		#N/A		#N/A		#N/A		#N/A		#N/A		#N/A		#N/A
	147	#N/A		#N/A		#N/A		#N/A		#N/A		#N/A		#N/A		#N/A		#N/A		#N/A
	148	#N/A		#N/A		#N/A		#N/A		#N/A		#N/A		#N/A		#N/A		#N/A		#N/A
	149	#N/A		#N/A		#N/A		#N/A		#N/A		#N/A		#N/A		#N/A		#N/A		#N/A
	150	#N/A		#N/A		#N/A		#N/A		#N/A		#N/A		#N/A		#N/A		#N/A		#N/A
eggs per 24 h per female
			#DIV/0!																			sum	#DIV/0!
			#DIV/0!																				#DIV/0!
			#DIV/0!																				#DIV/0!
			#DIV/0!																				#DIV/0!
			#DIV/0!																				#DIV/0!
			#DIV/0!																				#DIV/0!
			#DIV/0!																				#DIV/0!
			#DIV/0!																				#DIV/0!
			#DIV/0!																				#DIV/0!
			#DIV/0!																				#DIV/0!
	average		#DIV/0!																			ave	#DIV/0!
	sd		#DIV/0!																			n	0
	n		0																			sd	#DIV/0!
	se		#DIV/0!																			error	#DIV/0!
UAS Odd RU-
	161	#N/A		#N/A		#N/A		#N/A		#N/A		#N/A		#N/A		#N/A		#N/A		#N/A
	162	#N/A		#N/A		#N/A		#N/A		#N/A		#N/A		#N/A		#N/A		#N/A		#N/A
	163	#N/A		#N/A		#N/A		#N/A		#N/A		#N/A		#N/A		#N/A		#N/A		#N/A
	164	#N/A		#N/A		#N/A		#N/A		#N/A		#N/A		#N/A		#N/A		#N/A		#N/A
	165	#N/A		#N/A		#N/A		#N/A		#N/A		#N/A		#N/A		#N/A		#N/A		#N/A
	166	#N/A		#N/A		#N/A		#N/A		#N/A		#N/A		#N/A		#N/A		#N/A		#N/A
	167	#N/A		#N/A		#N/A		#N/A		#N/A		#N/A		#N/A		#N/A		#N/A		#N/A
	168	#N/A		#N/A		#N/A		#N/A		#N/A		#N/A		#N/A		#N/A		#N/A		#N/A
	169	#N/A		#N/A		#N/A		#N/A		#N/A		#N/A		#N/A		#N/A		#N/A		#N/A
	170	#N/A		#N/A		#N/A		#N/A		#N/A		#N/A		#N/A		#N/A		#N/A		#N/A
eggs per 24 h per female
			#DIV/0!																			sum	#DIV/0!
			#DIV/0!																				#DIV/0!
			#DIV/0!																				#DIV/0!
			#DIV/0!																				#DIV/0!
			#DIV/0!																				#DIV/0!
			#DIV/0!																				#DIV/0!
			#DIV/0!																				#DIV/0!
			#DIV/0!																				#DIV/0!
			#DIV/0!																				#DIV/0!
			#DIV/0!																				#DIV/0!
	average		#DIV/0!																			ave	#DIV/0!
	sd		#DIV/0!																			n	0
	n		0																			sd	#DIV/0!
	se		#DIV/0!																			error	#DIV/0!
UAS Odd RU+
	181	#N/A		#N/A		#N/A		#N/A		#N/A		#N/A		#N/A		#N/A		#N/A		#N/A
	182	#N/A		#N/A		#N/A		#N/A		#N/A		#N/A		#N/A		#N/A		#N/A		#N/A
	183	#N/A		#N/A		#N/A		#N/A		#N/A		#N/A		#N/A		#N/A		#N/A		#N/A
	184	#N/A		#N/A		#N/A		#N/A		#N/A		#N/A		#N/A		#N/A		#N/A		#N/A
	185	#N/A		#N/A		#N/A		#N/A		#N/A		#N/A		#N/A		#N/A		#N/A		#N/A
	186	#N/A		#N/A		#N/A		#N/A		#N/A		#N/A		#N/A		#N/A		#N/A		#N/A
	187	#N/A		#N/A		#N/A		#N/A		#N/A		#N/A		#N/A		#N/A		#N/A		#N/A
	188	#N/A		#N/A		#N/A		#N/A		#N/A		#N/A		#N/A		#N/A		#N/A		#N/A
	189	#N/A		#N/A		#N/A		#N/A		#N/A		#N/A		#N/A		#N/A		#N/A		#N/A
	190	#N/A		#N/A		#N/A		#N/A		#N/A		#N/A		#N/A		#N/A		#N/A		#N/A
eggs per 24 h per female
			#DIV/0!																			sum	#DIV/0!
			#DIV/0!																				#DIV/0!
			#DIV/0!																				#DIV/0!
			#DIV/0!																				#DIV/0!
			#DIV/0!																				#DIV/0!
			#DIV/0!																				#DIV/0!
			#DIV/0!																				#DIV/0!
			#DIV/0!																				#DIV/0!
			#DIV/0!																				#DIV/0!
			#DIV/0!																				#DIV/0!
	average		#DIV/0!																			ave	#DIV/0!
	sd		#DIV/0!																			n	0
	n		0																			sd	#DIV/0!
	se		#DIV/0!																			error	#DIV/0!

## Sheet: popn per bottle
EXPERIMENT	ELAVGS control targets
CONDITION	UASInRDN RU-						sum deaths		144			censored		6								CONDITION	UAS INR RU+						sum deaths		122			censored		25
	1	2	3	4	5	6	7	8	9	10	11	12	13	14	15	16	17	18	19	20			101	102	103	104	105	106	107	108	109	110	111	112	113	114	115	116	117	118	119	120
dead	16	14	14	14	12	16	15	14	14	15	0	0	0	0	0	0	0	0	0	0		dead	13	12	13	12	12	16	13	10	12	9	0	0	0	0	0	0	0	0	0	0
censored	0	0	1	0	3	0	1	0	0	1	0	0	0	0	0	0	0	0	0	0		censored	2	2	2	1	3	1	3	4	3	4	0	0	0	0	0	0	0	0	0	0
remaining per bottle	-1	1	0	1	0	-1	-1	1	1	-1	15	15	15	15	15	15	15	15	15	15		remaining per bottle	0	1	0	2	0	-2	-1	1	0	2	15	15	15	15	15	15	15	15	15	15
CONDITION	UASINR DN RU+						sum deaths		143			censored		4								CONDITION	W1118 RU-						sum deaths		100			censored		7
	21	22	23	24	25	26	27	28	29	30	31	32	33	34	35	36	37	38	39	40			121	122	123	124	125	126	127	128	129	130	131	132	133	134	135	136	137	138	139	140
dead	16	14	11	15	13	14	15	16	15	14	0	0	0	0	0	0	0	0	0	0		dead	14	15	15	11	14	10	21	0	0	0	0	0	0	0	0	0	0	0	0	0
censored	1	0	0	0	2	0	0	1	0	0	0	0	0	0	0	0	0	0	0	0		censored	0	0	1	1	2	3	0	0	0	0	0	0	0	0	0	0	0	0	0	0
remaining per bottle	-2	1	4	0	0	1	0	-2	0	1	15	15	15	15	15	15	15	15	15	15		remaining per bottle	1	0	-1	3	-1	2	-6	15	15	15	15	15	15	15	15	15	15	15	15	15
CONDITION	UAS INR Active RU -						sum deaths		110			censored		9								CONDITION	W1118 RU+						sum deaths		90			censored		14
	41	42	43	44	45	46	47	48	49	50	51	52	53	54	55	56	57	58	59	60			141	142	143	144	145	146	147	148	149	150	151	152	153	154	155	156	157	158	159	160
dead	13	11	15	15	15	14	16	11	0	0	0	0	0	0	0	0	0	0	0	0		dead	13	14	15	6	14	12	16	0	0	0	0	0	0	0	0	0	0	0	0	0
censored	0	2	2	1	2	1	0	1	0	0	0	0	0	0	0	0	0	0	0	0		censored	2	0	1	10	0	1	0	0	0	0	0	0	0	0	0	0	0	0	0	0
remaining per bottle	2	2	-2	-1	-2	0	-1	3	15	15	15	15	15	15	15	15	15	15	15	15		remaining per bottle	0	1	-1	-1	1	2	-1	15	15	15	15	15	15	15	15	15	15	15	15	15
CONDITION	UAS INR Active RU+						sum deaths		131			censored		14								CONDITION	UAS Odd RU-						sum deaths		147			censored		4
	61	62	63	64	65	66	67	68	69	70	71	72	73	74	75	76	77	78	79	80			161	162	163	164	165	166	167	168	169	170	171	172	173	174	175	176	177	178	179	180
dead	13	11	13	13	11	13	13	15	15	14	0	0	0	0	0	0	0	0	0	0		dead	13	15	15	17	15	13	15	16	14	14	0	0	0	0	0	0	0	0	0	0
censored	2	0	4	2	2	2	1	0	0	1	0	0	0	0	0	0	0	0	0	0		censored	1	0	0	0	2	1	0	0	0	0	0	0	0	0	0	0	0	0	0	0
remaining per bottle	0	4	-2	0	2	0	1	0	0	0	15	15	15	15	15	15	15	15	15	15		remaining per bottle	1	0	0	-2	-2	1	0	-1	1	1	15	15	15	15	15	15	15	15	15	15
CONDITION	UAS INR RU-						sum deaths		134			censored		18								CONDITION	UAS Odd RU+						sum deaths		150			censored		3
	81	82	83	84	85	86	87	88	89	90	91	92	93	94	95	96	97	98	99	100			181	182	183	184	185	186	187	188	189	190	191	192	193	194	195	196	197	198	199	200
dead	14	16	13	14	10	15	14	14	10	14	0	0	0	0	0	0	0	0	0	0		dead	14	15	17	13	16	15	17	16	13	14	0	0	0	0	0	0	0	0	0	0
censored	2	1	2	3	5	0	1	1	3	0	0	0	0	0	0	0	0	0	0	0		censored	1	0	0	0	1	0	0	0	1	0	0	0	0	0	0	0	0	0	0	0
remaining per bottle	-1	-2	0	-2	0	0	0	0	2	1	15	15	15	15	15	15	15	15	15	15		remaining per bottle	0	0	-2	2	-2	0	-2	-1	1	1	15	15	15	15	15	15	15	15	15	15

## Sheet: sheet(1)
EXPERIMENT	ELAVGS control targets																									Name of tipper:
DAY	2																									Date/Time:
DATE	2018-01-31						time		1899-12-31 12:00:00																	Food date:
CONDITION	UASInRDN RU-						sum deaths		0			censored		0								CONDITION	UAS INR RU+						sum deaths		0			censored		0
	1	2	3	4	5	6	7	8	9	10	11	12	13	14	15	16	17	18	19	20			101	102	103	104	105	106	107	108	109	110	111	112	113	114	115	116	117	118	119	120
dead																						dead
carried over																						carried over
censored																						censored
CONDITION	UASINR DN RU+						sum deaths		0			censored		1								CONDITION	W1118 RU-						sum deaths		0			censored		1
	21	22	23	24	25	26	27	28	29	30	31	32	33	34	35	36	37	38	39	40			121	122	123	124	125	126	127	128	129	130	131	132	133	134	135	136	137	138	139	140
dead																						dead
carried over																						carried over
censored					1																	censored						1
CONDITION	UAS INR Active RU -						sum deaths		0			censored		0								CONDITION	W1118 RU+						sum deaths		0			censored		0
	41	42	43	44	45	46	47	48	49	50	51	52	53	54	55	56	57	58	59	60			141	142	143	144	145	146	147	148	149	150	151	152	153	154	155	156	157	158	159	160
dead																						dead
carried over																						carried over
censored																						censored
CONDITION	UAS INR Active RU+						sum deaths		0			censored		0								CONDITION	UAS Odd RU-						sum deaths		0			censored		0
	61	62	63	64	65	66	67	68	69	70	71	72	73	74	75	76	77	78	79	80			161	162	163	164	165	166	167	168	169	170	171	172	173	174	175	176	177	178	179	180
dead																						dead
carried over																						carried over
censored																						censored
CONDITION	UAS INR RU-						sum deaths		0			censored		0								CONDITION	UAS Odd RU+						sum deaths		0			censored		0
	81	82	83	84	85	86	87	88	89	90	91	92	93	94	95	96	97	98	99	100			181	182	183	184	185	186	187	188	189	190	191	192	193	194	195	196	197	198	199	200
dead																						dead
carried over																						carried over
censored																						censored

[truncated: 74 more sheets: sheet(2), sheet(3), sheet(4), sheet(5), sheet(6), sheet(7), sheet(8), sheet(9), sheet(10), sheet(11), sheet(12), sheet(13), sheet (14), sheet (15), sheet (16), sheet (17), sheet (18), sheet (19), sheet (20), sheet (21) …]
