# Supplementary material for: Enhanced insulin signalling ameliorates C9orf72 hexanucleotide repeat expansion toxicity in Drosophila
Source: eLife journal article supplement (doi:10.7554/elife.58565), 2021-03-19
Supplement: supp [file elife-58565-supp-v1.zip › elife_poa_e58565_Figure_2_source_data_3.xlsx]

## Sheet: Sheet1
Figure2-source data 3_Related to Figure 2C
Total activity
Drug	RU-	RU+	RU-	RU+
Genotype	(G4C2)36/+	(G4C2)36/+	(G4C2)36/InRActive	(G4C2)36/InRActive
	846	235	1349	1582		Two-way ANOVA	Ordinary
	1270	1412	1036	870		Alpha	0.05
	1527	216	1159	896
	1058	1125	908	1280		Source of Variation	% of total variation	P value	P value summary	Significant?
	1729	372	834	1423		Interaction(Drug_induction vs genotype)	14.95	< 0.0001	****	Yes
	1303	1439	1239	1913
	1154	452	1106	1713
	1955	813	1007	951		Compare cell means regardless of rows and columns
	2636	564	856	663
	1324	1125	1349	1301		Number of families	1
	1702	328	1153	916		Number of comparisons per family	6
	851	1297	1271	1630		Alpha	0.05
	1309	1772	579	1656
	811	693	1334	1322		Sidak's multiple comparisons test	Mean Diff.	95% CI of diff.	Significant?	Summary	Adjusted P Value
	2100	1166	948	1343
	1971	634	846	2445		ru-:(G4C2)36/+ vs. ru-:(G4C2)36//InRactive	410.6	84.41 to 736.9	Yes	**	0.0061
	659	219	1235	2617		ru-:(G4C2)36/+vs. ru+:(G4C2)36/+	497.7	179.9 to 815.6	Yes	***	0.0003
	1727	1190	793	1716		ru-:(G4C2)36/+ vs. ru+:(G4C2)36//InRactive	129.4	-196.9 to 455.6	No	ns	0.8726
	2416	1039	1202	981		ru-:G4C2)36/InRactive vs. ru+:(G4C2)36/	87.1	-239.1 to 413.3	No	ns	0.9793
	810	1005	803	753		ru-:(G4C2)36/InRactive vs. ru+:(G4C2)36/InRactive	-281.3	-615.7 to 53.14	No	ns	0.1474
	2074	850	1022	619		ru+:(G4C2)36/+ vs. ru+:(G4C2)36//InRactive	-368.4	-694.6 to -42.15	Yes	*	0.0184
	2135	837	630	582
	1177	853	1244	1734
	1097	287	558	1545		Test details	Mean 1	Mean 2	Mean Diff.	SE of diff.	N1	N2	t	DF
	1643	1704	643	1028
	1126	1065	846	664		ru-:36R vs. ru-:36R/InRactive	1414	1003	410.6	121.8	31	28	3.37	114
	2020	1762	993	1129		ru-:36R vs. ru+:36R	1414	915.9	497.7	118.7	31	31	4.193	114
	510	571	1141	688		ru-:36R vs. ru+:36R/InRactive	1414	1284	129.4	121.8	31	28	1.062	114
	1062	813				ru-:36R/InRactive vs. ru+:36R	1003	915.9	87.1	121.8	28	31	0.7148	114
	778	1604				ru-:36R/InRactive vs. ru+:36R/InRactive	1003	1284	-281.3	124.9	28	28	2.252	114
	1043	951				ru+:36R vs. ru+:36R/InRactive	915.9	1284	-368.4	121.8	31	28	3.023	114
