# Supplementary material for: Enhanced insulin signalling ameliorates C9orf72 hexanucleotide repeat expansion toxicity in Drosophila
Source: eLife journal article supplement (doi:10.7554/elife.58565), 2021-03-19
Supplement: supp [file elife-58565-supp-v1.zip › elife_poa_e58565_Figure_2_source_data_4.xlsx]

## Sheet: Sheet1
Figure 2- source data 4 _Related to figure 2D
					(G4C2)36/+ vs (G4C2)36/InRactive		RU+ - Induced
p53 levels and tubulin levels		ImageJ- intensity bands			Unpaired t test
					P value	0.0014
RU+ samples					P value summary	**
Sample name	dmp53 H3	Tubulin	Ratio		Significantly different? (P < 0.05)	Yes
(G4C2)36/+ A	27498.6	26808.8	1.02573		One- or two-tailed P value?	Two-tailed
(G4C2)36/+ B	22874	22335.5	1.02411		t, df	t=7.952 df=4
(G4C2)36/+ C	26616.4	27007.6	0.985516
(G4C2)36/InRactive A	20848.6	25577.4	0.815116		How big is the difference?
(G4C2)36/InR active B	26636	30622.6	0.869816		Mean ± SEM of column A	1.012 ± 0.01314 N=3
(G4C2)36/InRActive C	22066.6	27058.8	0.815505		Mean ± SEM of column C	0.8335 ± 0.01817 N=3
					Difference between means	-0.1783 ± 0.02242
					95% confidence interval	-0.2406 to -0.1160
					R squared	0.9405
							RU- samples
					Unpaired t test
					P value	0.6362
RU- samples					P value summary	ns
					Significantly different? (P < 0.05)	No
Sample name	dmp53 H3	Tubulin	Ratio		One- or two-tailed P value?	Two-tailed
(G4C2)36/+ A	19435.3	28408.8	0.68413		t, df	t=0.5111 df=4
(G4C2)36/+ B	20565	25994	0.791145
(G4C2)36/+ C	17980.6	18883.9	0.952168		How big is the difference?
(G4C2)36/InRactive A	13448.2	21738	0.618649		Mean ± SEM of column A	0.8091 ± 0.07790 N=3
(G4C2)36/InR active B	24387.2	25729.4	0.947836		Mean ± SEM of column C	0.8935 ± 0.1456 N=3
(G4C2)36/InRActive C	21802.9	19569	1.11415		Difference between means	0.08440 ± 0.1651
					95% confidence interval	-0.3741 to 0.5429
					R squared	0.06131
