# Supplementary material for: Enhanced insulin signalling ameliorates C9orf72 hexanucleotide repeat expansion toxicity in Drosophila
Source: eLife journal article supplement (doi:10.7554/elife.58565), 2021-03-19
Supplement: supp [file elife-58565-supp-v1.zip › elife_poa_e58565_Figure_3_source_data_1.xlsx]

## Sheet: Sheet1
Figure 3 - source data 1- Related to Figure 3A, 3B
Image J area measurements
Genotype													InRactive										InRDN
GMR	421872	445371	402569	413392	460030	460714	423891	470971	450321	581421	504215	517368	545563	508701	500208	499208	497353	472619	326793	379266	351499	365009	355938	345684	345834	371054	359192
GMR,(G4C2)36	256136	232094	204430	254508	219046	222156	273404	246519	253152	391410	360805	379071	410052	358623	392087	459213	372096	361254	131130	110648	148645	148645	122088	143510	112134	98521	99451
Mean GMR control	438792
Relative to the control
Genotype													InRactive										InRDN
GMR	0.961439	1.01499	0.917448	0.942113	1.0484	1.04996	0.96604	1.07333	1.02627	1.32505	1.1491	1.17907	1.24333	1.15932	1.13997	1.13769	1.13346	1.07709	0.744756	0.864341	0.80106	0.831849	0.811176	0.787808	0.78815	0.845626	0.818592
GMR,(G4C2)36	0.583729	0.528938	0.465892	0.580019	0.499202	0.50629	0.623083	0.561813	0.576929	0.892017	0.822268	0.863896	0.934501	0.817296	0.893559	1.04654	0.848	0.823292	0.298843	0.252165	0.338759	0.338759	0.278236	0.327057	0.255551	0.224528	0.226647
Two-way ANOVA	Ordinary
Alpha	0.05
Source of Variation	% of total variation	P value	P value summary	Significant?
Interaction	2.802	< 0.0001	****	Yes
Expression of repeats	50.5	< 0.0001	****	Yes
InR signaling	43.45	< 0.0001	****	Yes
ANOVA table	SS	DF	MS	F (DFn, DFd)	P value
Interaction	0.1342	2	0.06712	F (2, 48) = 20.70	P < 0.0001
Row Factor	2.419	1	2.419	F (1, 48) = 746.2	P < 0.0001
Column Factor	2.081	2	1.041	F (2, 48) = 321.0	P < 0.0001
Residual	0.1556	48	0.003242
Number of families	1
Number of comparisons per family	15
Alpha	0.05
Sidak's multiple comparisons test	Mean Diff.	95% CI of diff.	Significant?	Summary	Adjusted P Value
GMR:+/+ vs. GMR:UAS-InRactive	-0.1716	-0.2543 to -0.08887	Yes	****	< 0.0001
GMR:+/+ vs. GMR:UAS-InRDN	0.1896	0.1069 to 0.2723	Yes	****	< 0.0001
GMR:+/+ vs. GMR,(G4C2)36:+/+	0.4527	0.3700 to 0.5354	Yes	****	< 0.0001
GMR:+/+ vs. GMR,(G4C2)36:UAS-InRactive	0.1176	0.03493 to 0.2003	Yes	***	0.001
GMR:+/+ vs. GMR,(G4C2)36:UAS-InRDN	0.7177	0.6350 to 0.8004	Yes	****	< 0.0001
GMR:UAS-InRactive vs. GMR:UAS-InRDN	0.3612	0.2785 to 0.4439	Yes	****	< 0.0001
GMR:UAS-InRactive vs. GMR,(G4C2)36:+/+	0.6242	0.5415 to 0.7069	Yes	****	< 0.0001
GMR:UAS-InRactive vs. GMR,(G4C2)36:UAS-InRactive	0.2892	0.2065 to 0.3719	Yes	****	< 0.0001
GMR:UAS-InRactive vs. GMR,(G4C2)36:UAS-InRDN	0.8893	0.8066 to 0.9720	Yes	****	< 0.0001
GMR:UAS-InRDN vs. GMR,(G4C2)36:+/+	0.2631	0.1804 to 0.3457	Yes	****	< 0.0001
GMR:UAS-InRDN vs. GMR,(G4C2)36:UAS-InRactive	-0.072	-0.1547 to 0.01069	No	ns	0.1399
GMR:UAS-InRDN vs. GMR,(G4C2)36:UAS-InRDN	0.5281	0.4454 to 0.6108	Yes	****	< 0.0001
GMR,(G4C2)36:+/+ vs. GMR,(G4C2)36:UAS-InRactive	-0.3351	-0.4177 to -0.2524	Yes	****	< 0.0001
GMR,(G4C2)36:+/+ vs. GMR,(G4C2)36:UAS-InRDN	0.265	0.1823 to 0.3477	Yes	****	< 0.0001
GMR,(G4C2)36:UAS-InRactive vs. GMR,(G4C2)36:UAS-InRDN	0.6001	0.5174 to 0.6828	Yes	****	< 0.0001
Test details	Mean 1	Mean 2	Mean Diff.	SE of diff.	N1	N2	t	DF
GMR:+/+ vs. GMR:UAS-InRactive	1	1.172	-0.1716	0.02684	9	9	6.392	48
GMR:+/+ vs. GMR:UAS-InRDN	1	0.8104	0.1896	0.02684	9	9	7.065	48
GMR:+/+ vs. GMR,(G4C2)36:+/+	1	0.5473	0.4527	0.02684	9	9	16.86	48
GMR:+/+ vs. GMR,(G4C2)36:UAS-InRactive	1	0.8824	0.1176	0.02684	9	9	4.382	48
GMR:+/+ vs. GMR,(G4C2)36:UAS-InRDN	1	0.2823	0.7177	0.02684	9	9	26.74	48
GMR:UAS-InRactive vs. GMR:UAS-InRDN	1.172	0.8104	0.3612	0.02684	9	9	13.46	48
GMR:UAS-InRactive vs. GMR,(G4C2)36:+/+	1.172	0.5473	0.6242	0.02684	9	9	23.26	48
GMR:UAS-InRactive vs. GMR,(G4C2)36:UAS-InRactive	1.172	0.8824	0.2892	0.02684	9	9	10.77	48
GMR:UAS-InRactive vs. GMR,(G4C2)36:UAS-InRDN	1.172	0.2823	0.8893	0.02684	9	9	33.13	48
GMR:UAS-InRDN vs. GMR,(G4C2)36:+/+	0.8104	0.5473	0.2631	0.02684	9	9	9.8	48
GMR:UAS-InRDN vs. GMR,(G4C2)36:UAS-InRactive	0.8104	0.8824	-0.072	0.02684	9	9	2.682	48
GMR:UAS-InRDN vs. GMR,(G4C2)36:UAS-InRDN	0.8104	0.2823	0.5281	0.02684	9	9	19.67	48
GMR,(G4C2)36:+/+ vs. GMR,(G4C2)36:UAS-InRactive	0.5473	0.8824	-0.3351	0.02684	9	9	12.48	48
GMR,(G4C2)36:+/+ vs. GMR,(G4C2)36:UAS-InRDN	0.5473	0.2823	0.265	0.02684	9	9	9.874	48
GMR,(G4C2)36:UAS-InRactive vs. GMR,(G4C2)36:UAS-InRDN	0.8824	0.2823	0.6001	0.02684	9	9	22.36	48
