# Supplementary material for: Enhanced insulin signalling ameliorates C9orf72 hexanucleotide repeat expansion toxicity in Drosophila
Source: eLife journal article supplement (doi:10.7554/elife.58565), 2021-03-19
Supplement: supp [file elife-58565-supp-v1.zip › elife_poa_e58565_Figure_3_source_data_2.xlsx]

## Sheet: Sheet1
Figure 3- source data 2_ Related to Figure 3C
Normalize to control GMR
Gentoype								/+																				dilp2
GmR	0.906779	1.0539	0.952235	1.01913	0.958935	1.04188	0.953575	1.1689	0.894755	1.18632	1.12344	0.9108	0.855964	1.05792	0.962955	0.94557	1.0258	0.932205	1.05658	0.992365	1.2719	0.937539	1.05791	1.24916	1.16624	0.861305	1.19031	1.16223	0.948238	0.960275	0.981674	1.25852	1.00174	1.12879	0.984349	1.15019	1.00842	1.14618	1.20503	1.20101	0.924165	1.14484	1.05657	0.987024	1.00174	1.00441	1.13815	0.985687	1.12612
GMR>(G4C2)36	0.552359	0.611206	0.699476	0.611206	0.617893	0.680617	0.532298	0.723243	0.597832	0.612543	0.672102	0.498862	0.563635	0.719047	0.617893	0.678924	0.644642	0.644642	0.462664	0.423169	0.522935	0.575095	0.585795	0.436003	0.710176	0.440015	0.627255	0.647317													0.924165	1.14484	1.05657	0.987024	0.68209	0.740937	0.592482	0.731575	0.802459
GraphPad Prism6
Two-way ANOVA	Ordinary
Alpha	0.05
Source of Variation	% of total variation	P value	P value summary	Significant?
Interaction	4.14	< 0.0001	****	Yes
Expression of the repeats	69.53	< 0.0001	****	Yes
Insulin signaling	4.704	< 0.0001	****	Yes
ANOVA table	SS	DF	MS	F (DFn, DFd)	P value
Interaction	0.2816	3	0.09385	F (3, 138) = 8.442	P < 0.0001
Expression of the repeats	4.729	1	4.729	F (1, 138) = 425.4	P < 0.0001
Insulin signaling	0.3199	3	0.1066	F (3, 138) = 9.592	P < 0.0001
Residual	1.534	138	0.01112
Number of families	1
Number of comparisons per family	28
Alpha	0.05
Holm-Sidak's multiple comparisons test	Mean Diff.	Significant?	Summary	Adjusted P Value
GMR:+/+ vs. GMR:Dilp2	-0.09355	Yes	*	0.045
GMR:+/+ vs. GMR:PI3KCA	-0.05383	No	ns	0.4376
GMR:+/+ vs. GMR:AKTCA	-0.02842	No	ns	0.7791
GMR:+/+ vs. GMR,GR36:+/+	0.3968	Yes	****	< 0.0001
GMR:+/+ vs. GMR,GR36:Dilp2	0.4319	Yes	****	< 0.0001
GMR:+/+ vs. GMR,GR36:PI3KCA	0.2061	Yes	****	< 0.0001
GMR:+/+ vs. GMR,GR36:AKTCA	0.2969	Yes	****	< 0.0001
GMR:Dilp2 vs. GMR:PI3KCA	0.03972	No	ns	0.6585
GMR:Dilp2 vs. GMR:AKTCA	0.06513	No	ns	0.2778
GMR:Dilp2 vs. GMR,GR36:+/+	0.4903	Yes	****	< 0.0001
GMR:Dilp2 vs. GMR,GR36:Dilp2	0.5255	Yes	****	< 0.0001
GMR:Dilp2 vs. GMR,GR36:PI3KCA	0.2997	Yes	****	< 0.0001
GMR:Dilp2 vs. GMR,GR36:AKTCA	0.3904	Yes	****	< 0.0001
GMR:PI3KCA vs. GMR:AKTCA	0.02541	No	ns	0.7791
GMR:PI3KCA vs. GMR,GR36:+/+	0.4506	Yes	****	< 0.0001
GMR:PI3KCA vs. GMR,GR36:Dilp2	0.4858	Yes	****	< 0.0001
GMR:PI3KCA vs. GMR,GR36:PI3KCA	0.2599	Yes	****	< 0.0001
GMR:PI3KCA vs. GMR,GR36:AKTCA	0.3507	Yes	****	< 0.0001
GMR:AKTCA vs. GMR,GR36:+/+	0.4252	Yes	****	< 0.0001
GMR:AKTCA vs. GMR,GR36:Dilp2	0.4603	Yes	****	< 0.0001
GMR:AKTCA vs. GMR,GR36:PI3KCA	0.2345	Yes	****	< 0.0001
GMR:AKTCA vs. GMR,GR36:AKTCA	0.3253	Yes	****	< 0.0001
GMR,GR36:+/+ vs. GMR,GR36:Dilp2	0.03514	No	ns	0.7791
GMR,GR36:+/+ vs. GMR,GR36:PI3KCA	-0.1907	Yes	****	< 0.0001
GMR,GR36:+/+ vs. GMR,GR36:AKTCA	-0.09993	Yes	*	0.0365
GMR,GR36:Dilp2 vs. GMR,GR36:PI3KCA	-0.2258	Yes	****	< 0.0001
GMR,GR36:Dilp2 vs. GMR,GR36:AKTCA	-0.1351	Yes	*	0.0302
GMR,GR36:PI3KCA vs. GMR,GR36:AKTCA	0.09075	No	ns	0.0614
Test details	Mean 1	Mean 2	Mean Diff.	SE of diff.	N1	N2	t	DF
GMR:+/+ vs. GMR:Dilp2	1	1.094	-0.09355	0.03334	20	20	2.806	138
GMR:+/+ vs. GMR:PI3KCA	1	1.054	-0.05383	0.03334	20	20	1.614	138
GMR:+/+ vs. GMR:AKTCA	1	1.028	-0.02842	0.03334	20	20	0.8523	138
GMR:+/+ vs. GMR,GR36:+/+	1	0.6032	0.3968	0.03334	20	20	11.9	138
GMR:+/+ vs. GMR,GR36:Dilp2	1	0.5681	0.4319	0.04411	20	8	9.792	138
GMR:+/+ vs. GMR,GR36:PI3KCA	1	0.7939	0.2061	0.03334	20	20	6.181	138
GMR:+/+ vs. GMR,GR36:AKTCA	1	0.7031	0.2969	0.03426	20	18	8.666	138
GMR:Dilp2 vs. GMR:PI3KCA	1.094	1.054	0.03972	0.03334	20	20	1.191	138
GMR:Dilp2 vs. GMR:AKTCA	1.094	1.028	0.06513	0.03334	20	20	1.953	138
GMR:Dilp2 vs. GMR,GR36:+/+	1.094	0.6032	0.4903	0.03334	20	20	14.71	138
GMR:Dilp2 vs. GMR,GR36:Dilp2	1.094	0.5681	0.5255	0.04411	20	8	11.91	138
GMR:Dilp2 vs. GMR,GR36:PI3KCA	1.094	0.7939	0.2997	0.03334	20	20	8.987	138
GMR:Dilp2 vs. GMR,GR36:AKTCA	1.094	0.7031	0.3904	0.03426	20	18	11.4	138
GMR:PI3KCA vs. GMR:AKTCA	1.054	1.028	0.02541	0.03334	20	20	0.7621	138
GMR:PI3KCA vs. GMR,GR36:+/+	1.054	0.6032	0.4506	0.03334	20	20	13.51	138
GMR:PI3KCA vs. GMR,GR36:Dilp2	1.054	0.5681	0.4858	0.04411	20	8	11.01	138
GMR:PI3KCA vs. GMR,GR36:PI3KCA	1.054	0.7939	0.2599	0.03334	20	20	7.796	138
GMR:PI3KCA vs. GMR,GR36:AKTCA	1.054	0.7031	0.3507	0.03426	20	18	10.24	138
GMR:AKTCA vs. GMR,GR36:+/+	1.028	0.6032	0.4252	0.03334	20	20	12.75	138
GMR:AKTCA vs. GMR,GR36:Dilp2	1.028	0.5681	0.4603	0.04411	20	8	10.44	138
GMR:AKTCA vs. GMR,GR36:PI3KCA	1.028	0.7939	0.2345	0.03334	20	20	7.034	138
GMR:AKTCA vs. GMR,GR36:AKTCA	1.028	0.7031	0.3253	0.03426	20	18	9.495	138
GMR,GR36:+/+ vs. GMR,GR36:Dilp2	0.6032	0.5681	0.03514	0.04411	20	8	0.7966	138
GMR,GR36:+/+ vs. GMR,GR36:PI3KCA	0.6032	0.7939	-0.1907	0.03334	20	20	5.719	138
GMR,GR36:+/+ vs. GMR,GR36:AKTCA	0.6032	0.7031	-0.09993	0.03426	20	18	2.917	138
GMR,GR36:Dilp2 vs. GMR,GR36:PI3KCA	0.5681	0.7939	-0.2258	0.04411	8	20	5.12	138
GMR,GR36:Dilp2 vs. GMR,GR36:AKTCA	0.5681	0.7031	-0.1351	0.0448	8	18	3.015	138
GMR,GR36:PI3KCA vs. GMR,GR36:AKTCA	0.7939	0.7031	0.09075	0.03426	20	18	2.649	138
[truncated: 31 more columns]
