# Supplementary material for: Enhanced insulin signalling ameliorates C9orf72 hexanucleotide repeat expansion toxicity in Drosophila
Source: eLife journal article supplement (doi:10.7554/elife.58565), 2021-03-19
Supplement: supp [file elife-58565-supp-v1.zip › elife_poa_e58565_Figure_4_source_data_1.xlsx]

## Sheet: BCA 750nm
Plate 1	1	2	3	4	5	6	7	8	9	10
A	ST1	0.8	E1	E1	E9	E9	E17	E17	E25	E25
B	ST2	0.5	E2	E2	E10	E10	E18	E18	E26	E26
C	ST3	0.3	E3	E3	E11	E11	E19	E19	E27	E27
D	ST4	0.2	E4	E4	E12	E12	E20	E20	E28	E28
E	ST5	0.1	E5	E5	E13	E13	E21	E21	E29	E29
F	ST6	0	E6	E6	E14	E14	E22	E22	Neg	Neg
G	PBMC 75	PBMC 75	E7	E7	E15	E15	E23	E23
H	PBMC 184	PBMC 184	E8	E8	E16	E16	E24	E24
Standards	mg/ml	vol BSA	vol H2o	vol RIPA		Samples	3 ul + 12 ul H2O					Samples description
ST1	0.8	26.0163	5.98374	8		Standards	BSA + H2O + RIPA (1/5)					A1-8	(G4C2)36/InRDN
ST2	0.5	16.2602	15.7398	8								E1-8	(G4C2)36/+
ST3	0.3	9.7561	22.2439	8								I1-8	(G4C2)36/InRActive
ST4	0.2	6.50407	25.4959	8
ST5	0.1	3.25203	28.748	8
ST6	0	0	32	8
	1	2	3	4	5	6	7	8	9	10
A	0.227	0.231	0.122	0.124	0.119	0.119	0.133	0.138	0.126	0.121
B	0.169	0.171	0.122	0.121	0.117	0.12	0.133	0.133	0.132	0.134
C	0.125	0.125	0.114	0.116	0.154	0.133	0.177	0.128	0.123	0.126
D	0.098	0.097	0.11	0.111	0.113	0.112	0.122	0.122	0.132	0.135
E	0.084	0.083	0.126	0.126	0.12	0.12	0.121	0.122	0.121	0.117
F	0.059	0.059	0.117	0.118	0.123	0.122	0.134	0.132	0.063	0.062
G	0.09	0.089	0.124	0.125	0.12	0.12	0.117	0.119
H	0.089	0.089	0.12	0.122	0.127	0.13	0.11	0.112
						AVERAGE	AVERAGE- Blank	Value	Concent (mg/ml)
Average	mg/ml	Average - blank		A1	E1	0.123	0.064	0.2964	1.482
0.229	0.8	0.17		A2	E2	0.1215	0.0625	0.289388	1.44694
0.17	0.5	0.111		A3	E3	0.115	0.056	0.259	1.295
0.125	0.3	0.066		A4	E4	0.1105	0.0515	0.237962	1.18981
0.0975	0.2	0.0385		A5	E5	0.126	0.067	0.310425	1.55213
0.0835	0.1	0.0245		A6	E6	0.1175	0.0585	0.270687	1.35344
0.059	0	0		A7	E7	0.1245	0.0655	0.303413	1.51706
				A8	E8	0.121	0.062	0.28705	1.43525
				E1	E9	0.119	0.06	0.2777	1.3885
				E2	E10	0.1185	0.0595	0.275362	1.37681
				E3	E11	0.1435	0.0845	0.392239	1.9612
				E4	E12	0.1125	0.0535	0.247312	1.23656
				E5	E13	0.12	0.061	0.282375	1.41187
				E6	E14	0.1225	0.0635	0.294063	1.47031
				E7	E15	0.12	0.061	0.282375	1.41187
				E8	E16	0.1285	0.0695	0.322113	1.61057
				I1	E17	0.1355	0.0765	0.354839	1.77419
				I2	E18	0.133	0.074	0.343151	1.71576
				I3	E19	0.1525	0.0935	0.434315	2.17158
				I4	E20	0.122	0.063	0.291725	1.45863
				I5	E21	0.1215	0.0625	0.289388	1.44694
				I6	E22	0.133	0.074	0.343151	1.71576
				I7	E23	0.118	0.059	0.273025	1.36512
				I8	E24	0.111	0.052	0.240299	1.2015
				M1	E25	0.1235	0.0645	0.298738	1.49369
				M2	E26	0.133	0.074	0.343151	1.71576
				M3	E27	0.1245	0.0655	0.303413	1.51706
				M4	E28	0.1335	0.0745	0.345489	1.72744
				M5	E29	0.119	0.06	0.2777	1.3885
					PBMC 75	0.0895	0.0305	0.139785	0.698925
					PBMC 184	0.089	0.03	0.137447	0.687237
					Neg	0.0625	0.0035	0.0135577	0.0677887

## Sheet: MSD plate maps
	antiGR	1	2	3	4	5	6	7	8	9	10
	A	STD1	STD1	STD1	STD1	E1	E1	E9	E9	E17	E17	E25	E25
	B	STD2	STD2	STD2	STD2	E2	E2	E10	E10	E18	E18	E26	E26
	C	STD3	STD3	STD3	STD3	E3	E3	E11	E11	E19	E19	E27	E27
	D	STD4	STD4	STD4	STD4	E4	E4	E12	E12	E20	E20	E28	E28
	E	STD5	STD5	STD5	STD5	E5	E5	E13	E13	E21	E21	E29	E29
	F	STD6	STD6	STD6	STD6	E6	E6	E14	E14	E22	E22
	G	STD7	STD7	STD7	STD7	E7	E7	E15	E15	E23	E23
	H	blank	blank	blank	blank	E8	E8	E16	E16	E24	E24
		GP Std (New)		GR Std (TM)
	Samples	Concent (mg/ml)	Dilution factor	Volume sample	Vol RIPA	Final conc.	ug per well		Standards	Stock	1	mg/ml
A1	E1	1.482	0.802839	44.1562	10.8438	1.18981	29.7452			1/1000	1000	ng/ml
A2	E2	1.44694	0.822294	45.2262	9.77383	1.18981	29.7452
A3	E3	1.295	0.918773	50.5325	4.46751	1.18981	29.7452			above	RIPA			65.45
A4	E4	1.18981	1	55	0	1.18981	29.7452		500	250	250	500		45.4514
A5	E5	1.55213	0.766566	42.1611	12.8389	1.18981	29.7452		100	100	400	100
A6	E6	1.35344	0.879102	57.16	12.84	1.10518	27.6294		25	100	300	25
A7	E7	1.51706	0.784284	42.9	7.1	1.30164	32.541		12.5	200	200	12.5
A8	E8	1.43525	0.82899	45.5945	9.40554	1.18981	29.7452		3.125	100	300	3.125
E1	E9	1.3885	0.856902	47.1296	7.87037	1.18981	29.7452		0.3125	50	450	0.3125
E2	E10	1.37681	0.864177	47.5297	7.47029	1.18981	29.7452		0.03125	50	450	0.03125
E3	E11	1.9612	0.606675	33.3671	21.6329	1.18981	29.7452		0	0	100	0
E4	E12	1.23656	0.962193	52.9206	2.0794	1.18981	29.7452
E5	E13	1.41187	0.842715	46.3493	8.65066	1.18981	29.7452				3450
E6	E14	1.47031	0.809221	44.5072	10.4928	1.18981	29.7452
E7	E15	1.41187	0.842715	46.3493	8.65066	1.18981	29.7452		Standard	25 ul/well
E8	E16	1.61057	0.738752	40.6313	14.3687	1.18981	29.7452		Sample	25 ul/well
I1	E17	1.77419	0.670619	36.8841	18.1159	1.18981	29.7452
I2	E18	1.71576	0.69346	38.1403	16.8597	1.18981	29.7452
I3	E19	2.17158	0.547901	30.1346	24.8654	1.18981	29.7452
I4	E20	1.45863	0.815705	44.8638	10.1362	1.18981	29.7452
I5	E21	1.44694	0.822294	45.2262	9.77383	1.18981	29.7452
I6	E22	1.71576	0.69346	38.1403	16.8597	1.18981	29.7452
I7	E23	1.36512	0.871575	47.9366	7.06336	1.18981	29.7452
I8	E24	1.2015	0.990272	54.465	0.535019	1.18981	29.7452
M1	E25	1.49369	0.796557	43.8106	11.1894	1.18981	29.7452
M2	E26	1.71576	0.69346	38.1403	16.8597	1.18981	29.7452
M3	E27	1.51706	0.784284	43.1356	11.8644	1.18981	29.7452
M4	E28	1.72744	0.688769	37.8823	17.1177	1.18981	29.7452
M5	E29	1.3885	0.856902	47.1296	7.87037	1.18981	29.7452

## Sheet: E heads results
antiGR	1	2	3	4	5	6	7	8	9	10
A	STD1	STD1	STD1	STD1	E1	E1	E9	E9	E17	E17	E25	E25		1282.04
B	STD2	STD2	STD2	STD2	E2	E2	E10	E10	E18	E18	E26	E26		2284.39
C	STD3	STD3	STD3	STD3	E3	E3	E11	E11	E19	E19	E27	E27		2432.49
D	STD4	STD4	STD4	STD4	E4	E4	E12	E12	E20	E20	E28	E28		2377.3
E	STD5	STD5	STD5	STD5	E5	E5	E13	E13	E21	E21	E29	E29		2335.93
F	STD6	STD6	STD6	STD6	E6	E6	E14	E14	E22	E22				2421.45
G	STD7	STD7	STD7	STD7	E7	E7	E15	E15	E23	E23				2380.06
H	blank	blank	blank	blank	E8	E8	E16	E16	E24	E24				1209.87
	GP Std (New)		GR Std (TM)
	1	2	3	4	5	6	7	8	9	10	11	12
A	12068	11089	106154	102265	2754	2758	3379	3581	1393	1171	647	646
B	8448	8441	30540	31060	2871	2879	3336	3309	2403	2166	603	602
C	4185	4099	5935	5972	2826	3046	3719	2921	2539	2326	630	598
D	2228	2171	2637	2677	2514	2904	3036	3439	2501	2252	573	562
E	482	493	649	627	2497	3087	2984	3265	2116	2555	629	598
F	106	110	137	126	2114	2530	2802	3005	2387	2456	95	87
G	77	77	87	79	2749	2773	2496	2896	2372	2389	91	89
H	71	70	80	70	2483	2879	2359	2767	1145	1274	87	86
Std GP	Average	Log Conc.	Average-blank		Std GR	Average	Log Conc.	Average-blank
500	11578.5	2.69897	11508		500	104210	2.69897	104134
100	8444.5	2	8374		100	30800	2	30725
25	4142	1.39794	4071.5		25	5953.5	1.39794	5878.5
12.5	2199.5	1.09691	2129		12.5	2657	1.09691	2582
3.125	487.5	0.49485	417		3.125	638	0.49485	563
0.3125	108	-0.50515	37.5		0.3125	131.5	-0.50515	56.5
0.03125	77	-1.50515	6.5		0.03125	83	-1.50515	8
0	70.5				0	75
BCA concentration	Sample		Average	Average - M4	Interpolated	Conc (mg/ml)	Conc sample	Conc. ng/mg
1.482	A1	E1	2756	2188.5	0.982424	9.60339	1.18981	8.07137
1.44694	A2	E2	2875	2307.5	1.00494	10.1144	1.18981	8.50087
1.295	A3	E3	2936	2368.5	1.01604	10.3761	1.18981	8.72086	(G4C2)36/InRDN
1.18981	A4	E4	2709	2141.5	0.973192	9.4014	1.18981	7.90161
1.55213	A5	E5	2792	2224.5	0.989363	9.75804	1.18981	8.20136							(G4C2)36/+	(G4C2)36/InRActive	(G4C2)36/InRDN
1.35344	A6	E6	2322	1754.5	0.888431	7.73448	1.10518	6.99841							8.6	2.69	8.07
1.51706	A7	E7	2761	2193.5	0.983395	9.62487	1.30164	7.39441	Do not use differente concentration						10.1	6.36	8.5
1.43525	A8	E8	2681	2113.5	0.967596	9.28102	1.18981	7.80043							9.8	6.9	8.72
1.3885	E1	E9	3480	2912.5	1.10396	12.7045	1.18981	10.6778							7.37	6.7	7.9
1.37681	E2	E10	3322.5	2755	1.08032	12.0314	1.18981	10.1121							10.68	6.55	8.2
1.9612	E3	E11	3320	2752.5	1.07993	12.0207	1.18981	10.1031							9.4	6.86	6.99
1.23656	E4	E12	3237.5	2670	1.06699	11.6678	1.18981	9.80647	(G4C2)36/+						7.85	6.71	7.8
1.41187	E5	E13	3124.5	2557	1.0486	11.1841	1.18981	9.39991							10.11	2.43
1.47031	E6	E14	2903.5	2336	1.01016	10.2367	1.18981	8.60367
1.41187	E7	E15	2696	2128.5	0.970603	9.34551	1.18981	7.85464						Mean	9.23875
1.61057	E8	E16	2563	1995.5	0.943165	8.77334	1.18981	7.37374
1.77419	I1	E17	1282	714.5	0.506408	3.20928	1.18981	2.69731
1.71576	I2	E18	2284.5	1717	0.879243	7.57257	1.18981	6.36453				Relative to (G4C2)36
2.17158	I3	E19	2432.5	1865	0.914404	8.21115	1.18981	6.90124						(G4C2)36/+	(G4C2)36/InRActive	(G4C2)36/InRDN
1.45863	I4	E20	2376.5	1809	0.901439	7.96965	1.18981	6.69827						0.930837	0.291145	0.873435
1.44694	I5	E21	2335.5	1768	0.891691	7.79275	1.18981	6.54958	(G4C2)36/InRActive					1.09319	0.688358	0.919975
1.71576	I6	E22	2421.5	1854	0.911888	8.16372	1.18981	6.86138						1.06072	0.746803	0.943786
1.36512	I7	E23	2380.5	1813	0.902379	7.98691	1.18981	6.71277						0.797705	0.725157	0.855035
1.2015	I8	E24	1209.5	642	0.460909	2.89007	1.18981	2.42902						1.15597	0.708922	0.887505
1.49369	M1	E25	646.5	79		1	1.18981	0.840472						1.01743	0.742474	0.756544
1.71576	M2	E26	602.5	35		1	1.18981	0.840472						0.849659	0.726239	0.844212
1.51706	M3	E27	614	46.5		1	1.18981	0.840472						1.09427	0.263005
1.72744	M4	E28	567.5	0		1	1.18981	0.840472
1.3885	M5	E29	613.5	46		1	1.18981	0.840472
												Statistical analysis
												One-way ANOVA summary
												F	14.25
												P value	0.0001
												P value summary	***
												Are differences among means statistically significant? (P < 0.05)	Yes
												R square	0.5876
												Number of families	1
												Number of comparisons per family	3
												Alpha	0.05
												Tukey's multiple comparisons test	Mean Diff.	95% CI of diff.	Significant?	Summary	Adjusted P Value
												(G4C2)36/+ vs. (G4C2)36/InR Active	0.3885	0.2014 to 0.5755	Yes	***	0.0001
												(G4C2)36/+ vs. (G4C2)36/InRDN	0.1313	-0.06227 to 0.3249	No	ns	0.2238
												(G4C2)36/InR Active vs. (G4C2)36/InRDN	-0.2571	-0.4507 to -0.06353	Yes	**	0.0084
												Test details	Mean 1	Mean 2	Mean Diff.	SE of diff.	n1	n2	q	DF
												(G4C2)36/+ vs. (G4C2)36/InR Active	1	0.6115	0.3885	0.07393	8	8	7.431	20
												(G4C2)36/+ vs. (G4C2)36/InRDN	1	0.8686	0.1313	0.07652	8	7	2.427	20
												(G4C2)36/InR Active vs. (G4C2)36/InRDN	0.6115	0.8686	-0.2571	0.07652	8	7	4.752	20
