# Supplementary material for: Enhanced insulin signalling ameliorates C9orf72 hexanucleotide repeat expansion toxicity in Drosophila
Source: eLife journal article supplement (doi:10.7554/elife.58565), 2021-03-19
Supplement: supp [file elife-58565-supp-v1.zip › elife_poa_e58565_Figure_4_source_data_2.xlsx]

## Sheet: BCA 750nm
Plate 1	1	2	3	4	5	6	7	8	9	10
A	Standards	mg/ml	E1	E1	E9	E9	E17	E17	E25	E25
B	ST1	0.8	E2	E2	E10	E10	E18	E18	E26	E26
C	ST2	0.5	E3	E3	E11	E11	E19	E19	E27	E27
D	ST3	0.3	E4	E4	E12	E12	E20	E20	E28	E28
E	ST4	0.2	E5	E5	E13	E13	E21	E21	E29	E29
F	ST5	0.1	E6	E6	E14	E14	E22	E22	A	A
G	ST6	0	E7	E7	E15	E15	E23	E23	B	B
H			E8	E8	E16	E16	E24	E24	C	C
Standards	mg/ml	vol BSA	vol H2o	vol RIPA		Samples	3 ul + 12 ul H2O
ST1	0.8	26.0163	5.98374	8		Standards	BSA + H2O + RIPA (1/5)
ST2	0.5	16.2602	15.7398	8
ST3	0.3	9.7561	22.2439	8
ST4	0.2	6.50407	25.4959	8
ST5	0.1	3.25203	28.748	8
ST6	0	0	32	8
	1	2	3	4	5	6	7	8	9	10
A	0.245	0.245	0.124	0.122	0.128	0.129	0.12	0.121	0.122	0.122
B	0.173	0.173	0.123	0.124	0.119	0.117	0.118	0.12	0.132	0.133
C	0.129	0.134	0.126	0.127	0.124	0.125	0.116	0.117	0.118	0.115
D	0.107	0.111	0.121	0.123	0.121	0.121	0.116	0.118	0.127	0.129
E	0.086	0.085	0.134	0.134	0.12	0.125	0.117	0.116	0.122	0.12
F	0.059	0.059	0.117	0.121	0.133	0.128	0.118	0.119	0.118	0.115
G			0.097	0.098	0.122	0.12	0.112	0.108	0.116	0.114
H			0.119	0.121	0.113	0.111	0.117	0.117	0.108	0.106
				Samples	Well	AVERAGE	AVERAGE- Blank	Value	Concent (mg/ml)
Average	mg/ml	Average - blank		M1	E1	0.123	0.064	0.269231	1.34615
0.245	0.8	0.186		M2	E2	0.1235	0.0645	0.271416	1.35708					Samples description
0.173	0.5	0.114		M3	E3	0.1265	0.0675	0.284528	1.42264
0.1315	0.3	0.0725		M4	E4	0.122	0.063	0.26486	1.3243					P1-P5	GR100/InRActive
0.109	0.2	0.05		M5	E5	0.134	0.075	0.317308	1.58654					Q1-Q5	GR100/InRDN
0.0855	0.1	0.0265		N1	E6	0.119	0.06	0.251748	1.25874					R1-R4	Gr100/+
0.059	0	0		N2	E7	0.0975	0.0385	0.15778	0.788899
				N3	E8	0.12	0.061	0.256119	1.28059
				N4	E9	0.1285	0.0695	0.293269	1.46635
				N5	E10	0.118	0.059	0.247378	1.23689
				P1	E11	0.1245	0.0655	0.275787	1.37893
				P2	E12	0.121	0.062	0.26049	1.30245
				P3	E13	0.1225	0.0635	0.267045	1.33523
				P4	E14	0.1305	0.0715	0.30201	1.51005
				P5	E15	0.121	0.062	0.26049	1.30245
				Q1	E16	0.112	0.053	0.221154	1.10577
				Q2	E17	0.1205	0.0615	0.258304	1.29152
				Q3	E18	0.119	0.06	0.251748	1.25874
				Q4	E19	0.1165	0.0575	0.240822	1.20411
				Q5	E20	0.117	0.058	0.243007	1.21503
				R1	E21	0.1165	0.0575	0.240822	1.20411
				R2	E22	0.1185	0.0595	0.249563	1.24781
				R3	E23	0.11	0.051	0.212413	1.06206
				R4	E24	0.117	0.058	0.243007	1.21503
				S1	E25	0.122	0.063	0.26486	1.3243
				S2	E26	0.1325	0.0735	0.310752	1.55376
				S3	E27	0.1165	0.0575	0.240822	1.20411
				S4	E28	0.128	0.069	0.291084	1.45542
				S5	E29	0.121	0.062	0.26049	1.30245
				A	E30	0.1165	0.0575	0.240822	1.20411
				B	E31	0.115	0.056	0.234266	1.17133
				C	E32	0.107	0.048	0.199301	0.996503

## Sheet: MSD plate maps
	antiGR	1	2	3	4	5	6	7	8	9	10
	A	STD1	STD1	E1	E1	E9	E9	E17	E17	E25	E25
	B	STD2	STD2	E2	E2	E10	E10	E18	E18	E26	E26
	C	STD3	STD3	E3	E3	E11	E11	E19	E19	E27	E27
	D	STD4	STD4	E4	E4	E12	E12	E20	E20	E28	E28
	E	STD5	STD5	E5	E5	E13	E13	E21	E21	E29	E29
	F	STD6	STD6	E6	E6	E14	E14	E22	E22	A	A
	G	STD7	STD7	E7	E7	E15	E15	E23	E23	B	B
	H	blank	blank	E8	E8	E16	E16	E24	E24	C	C
Samples	plate Well	Concent (mg/ml)	Dilution factor	Volume sample	Vol RIPA	Final conc.	ug per well		Standards	Stock	1	mg/ml
M1	E1	1.34615	0.788961	43.3929	11.6071	1.06206	26.5516			1/1000	1000	ng/ml
M2	E2	1.35708	0.782609	43.0435	11.9565	1.06206	26.5516
M3	E3	1.42264	0.746544	41.0599	13.9401	1.06206	26.5516			above	RIPA
M4	E4	1.3243	0.80198	44.1089	10.8911	1.06206	26.5516		500	250	250	500		Samples description
M5	E5	1.58654	0.669421	36.8182	18.1818	1.06206	26.5516		100	100	400	100
N1	E6	1.25874	0.84375	46.4063	8.59375	1.06206	26.5516		25	100	300	25		P1-P5	GR100/InRActive		E11-E15
N2	E7	0.788899	1.34626	55	0	0.788899	19.7225		12.5	200	200	12.5		Q1-Q5	GR100/InRDN		E16-E20
N3	E8	1.28059	0.829352	45.6143	9.38567	1.06206	26.5516		3.125	100	300	3.125		R1-R4	Gr100/+		E21-E24
N4	E9	1.46635	0.724292	39.8361	15.1639	1.06206	26.5516		0.3125	50	450	0.3125
N5	E10	1.23689	0.858657	47.2261	7.77385	1.06206	26.5516		0.03125	50	450	0.03125
P1	E11	1.37893	0.770206	42.3613	12.6387	1.06206	26.5516		0	0	100	0
P2	E12	1.30245	0.815436	44.849	10.151	1.06206	26.5516
P3	E13	1.33523	0.795417	43.748	11.252	1.06206	26.5516				3450
P4	E14	1.51005	0.703329	38.6831	16.3169	1.06206	26.5516
P5	E15	1.30245	0.815436	44.849	10.151	1.06206	26.5516		Standard	25 ul/well
Q1	E16	1.10577	0.960474	52.8261	2.17391	1.06206	26.5516		Sample	25 ul/well
Q2	E17	1.29152	0.822335	45.2284	9.77157	1.06206	26.5516
Q3	E18	1.25874	0.84375	46.4063	8.59375	1.06206	26.5516
Q4	E19	1.20411	0.882033	48.5118	6.4882	1.06206	26.5516
Q5	E20	1.21503	0.874101	48.0755	6.92446	1.06206	26.5516
R1	E21	1.20411	0.882033	48.5118	6.4882	1.06206	26.5516
R2	E22	1.24781	0.851138	46.8126	8.18739	1.06206	26.5516
R3	E23	1.06206	1	55	0	1.06206	26.5516
R4	E24	1.21503	0.874101	48.0755	6.92446	1.06206	26.5516
S1	E25	1.3243	0.80198	44.1089	10.8911	1.06206	26.5516
S2	E26	1.55376	0.683544	37.5949	17.4051	1.06206	26.5516
S3	E27	1.20411	0.882033	48.5118	6.4882	1.06206	26.5516
S4	E28	1.45542	0.72973	40.1351	14.8649	1.06206	26.5516
S5	E29	1.30245	0.815436	44.849	10.151	1.06206	26.5516
A	A	1.20411	0.882033	48.5118	6.4882	1.06206	26.5516
B	B	1.17133	0.906716	49.8694	5.1306	1.06206	26.5516
C	C	0.996503	1.06579	55	0	0.996503	24.9126
					294.975

## Sheet: E heads results_genotype result
antiGR	1	2	3	4	5	6	7	8	9	10
A	STD1	STD1	E1	E1	E9	E9	E17	E17	E25	E25
B	STD2	STD2	E2	E2	E10	E10	E18	E18	E26	E26
C	STD3	STD3	E3	E3	E11	E11	E19	E19	E27	E27
D	STD4	STD4	E4	E4	E12	E12	E20	E20	E28	E28
E	STD5	STD5	E5	E5	E13	E13	E21	E21	E29	E29
F	STD6	STD6	E6	E6	E14	E14	E22	E22	E30	E30
G	STD7	STD7	E7	E7	E15	E15	E23	E23	E31	E31
H	blank	blank	E8	E8	E16	E16	E24	E24	E32	E32
Results	1	2	3	4	5	6	7	8	9	10
A	78419	82231	619	583	1916	2115	1783	1821	3159	2931
B	18148	19564	645	668	1743	1744	1705	1759	2620	2600
C	3842	3996	589	588	1413	1402	1941	1950	2949	2842
D	1811	1894	622	596	1535	1510	2479	2473	2227	2110
E	418	436	601	578	1686	1676	2656	2696	3307	3163
F	104	113	2164	2144	1610	1651	2897	2748	2008	1979
G	78	81	2475	2418	2216	2292	3088	3108	1256	1225
H	74	79	2381	2397	2300	2262	2288	2344	884
Standards	Average	Log Conc.	Average-blank
500	80325	2.69897	80248.5
100	18856	2	18779.5
25	3919	1.39794	3842.5
12.5	1852.5	1.09691	1776
3.125	427	0.49485	350.5
0.3125	108.5	-0.50515	32
0.03125	79.5	-1.50515	3
0	76.5
BCA concentration	Sample	Plate well	Average	Average - w1118	Interpolated	Conc (mg/ml)	Conc sample	Conc. ng/mg								Statistical analysis - One-Way ANOVA
1.34615	M1	E1	601	12.5			1.06206	0
1.35708	M2	E2	656.5	68	-0.195473	0.637569	1.06206	0.600312		Samples description						Number of families	1
1.42264	M3	E3	588.5	0			1.06206	0								Number of comparisons per family	3
1.3243	M4	E4	609	20.5	-2.19869	0.00632858	1.06206	0.00595876		P1-P5	GR100/InRActive					Alpha	0.05
1.58654	M5	E5	589.5	1			1.06206	0		Q1-Q5	GR100/InRDN
1.25874	N1	E6	2154	1565.5	1.06252	11.5483	1.06206	10.8735		R1-R4	Gr100/+					Tukey's multiple comparisons test	Mean Diff.	95% CI of diff.	Significant?	Summary	Adjusted P Value
0.788899	N2	E7	2446.5	1858	1.12566	13.3556	0.788899	16.9294
1.28059	N3	E8	2389	1800.5	1.11408	13.004	1.06206	12.2441								GR100/+ vs. GR100/InR Active	0.4089	0.1620 to 0.6559	Yes	**	0.0025
1.46635	N4	E9	2015.5	1427	1.02836	10.6747	1.06206	10.0509								GR100/+ vs. GR100/InRDN	0.2539	0.006909 to 0.5008	Yes	*	0.044
1.23689	N5	E10	1743.5	1155	0.950275	8.91815	1.06206	8.39701								GR100/InR Active vs. GR100/InRDN	-0.1551	-0.3879 to 0.07777	No	ns	0.215
1.37893	P1	E11	1407.5	819	0.822902	6.65122	1.06206	6.26255		0.444153
1.30245	P2	E12	1522.5	934	0.871669	7.44164	1.06206	7.00678		0.494829
1.33523	P3	E13	1681	1092.5	0.929706	8.50563	1.06206	8.00859		0.565579	GR100/InRActive					Test details	Mean 1	Mean 2	Mean Diff.	SE of diff.	n1	n2	q	DF
1.51005	P4	E14	1630.5	1042	0.912197	8.16953	1.06206	7.69213		0.54323
1.30245	P5	E15	2254	1665.5	1.08535	12.1716	1.06206	11.4603		0.809347						GR100/+ vs. GR100/InR Active	0.98	0.5711	0.4089	0.09144	4	5	6.325	11
1.10577	Q1	E16	2281	1692.5	1.09128	12.3389	1.06206	11.6178		0.82047						GR100/+ vs. GR100/InRDN	0.98	0.7261	0.2539	0.09144	4	5	3.926	11
1.29152	Q2	E17	1802	1213.5	0.968531	9.30103	1.06206	8.75752		0.618469						GR100/InR Active vs. GR100/InRDN	0.5711	0.7261	-0.1551	0.08621	5	5	2.544	11
1.25874	Q3	E18	1732	1143.5	0.956576	9.04849	1.06206	8.51973		0.601676	Gr100/InRDN
1.20411	Q4	E19	1945.5	1357	1.0098	10.2281	1.06206	9.63045		0.680117
1.21503	Q5	E20	2476	1887.5	1.13147	13.5353	1.06206	12.7444		0.900027
1.20411	R1	E21	2676	2087.5	1.16859	14.7431	1.06206	13.8816		0.980339				Conc (ng/ml)
1.24781	R2	E22	2822.5	2234	1.19359	15.6168	1.06206	14.7042		1.03844			Average	14.1594
1.06206	R3	E23	3098	2509.5	1.23648	17.2376	1.06206	16.2303		1.14621	Gr100/+
1.21503	R4	E24	2316	1727.5	1.09882	12.5551	1.06206	11.8214		0.834848
1.3243	S1	E25	3045	2456.5	1.2286	16.9279	1.06206	15.9387
1.55376	S2	E26	2610	2021.5	1.15675	14.3466	1.06206	13.5082
1.20411	S3	E27	2895.5	2307	1.20545	16.049	1.06206	15.1112
1.45542	S4	E28	2168.5	1580	1.06592	11.6391	1.06206	10.9589
1.30245	S5	E29	3235	2646.5	1.25609	18.0338	1.06206	16.98
			Average	Average - blank	Interpolated	Conc (mg/ml)	Conc sample	Conc. ng/mg	Conc. pg/mg
1.20411	A	E30	1993.5	1993.5	1.15161	14.1778	1.06206	13.3493	13349.3
1.17133	B	E31	1240.5	1240.5	0.976659	9.47675	1.06206	8.92296	8922.96
0.996503	C	E32	884	884	0.851263	7.10007	0.996503	7.12498	7124.98
