# Supplementary material for: Enhanced insulin signalling ameliorates C9orf72 hexanucleotide repeat expansion toxicity in Drosophila
Source: eLife journal article supplement (doi:10.7554/elife.58565), 2021-03-19
Supplement: supp [file elife-58565-supp-v1.zip › elife_poa_e58565_Figure_4_source_data_3.xls]

## Sheet: summary
experiment	Gr100 InR alleles			start	2017-11-21
notes				day	date	day	date	day	date	day	date
				1	2017-11-22	26	2017-12-17	51	2018-01-11	76	2018-02-05
				2	2017-11-23	27	2017-12-18	52	2018-01-12	77	2018-02-06
				3	2017-11-24	28	2017-12-19	53	2018-01-13	78	2018-02-07
				4	2017-11-25	29	2017-12-20	54	2018-01-14	79	2018-02-08
				5	2017-11-26	30	2017-12-21	55	2018-01-15	80	2018-02-09
				6	2017-11-27	31	2017-12-22	56	2018-01-16	81	2018-02-10
				7	2017-11-28	32	2017-12-23	57	2018-01-17	82	2018-02-11
				8	2017-11-29	33	2017-12-24	58	2018-01-18	83	2018-02-12
				9	2017-11-30	34	2017-12-25	59	2018-01-19	84	2018-02-13
				10	2017-12-01	35	2017-12-26	60	2018-01-20	85	2018-02-14
				11	2017-12-02	36	2017-12-27	61	2018-01-21	86	2018-02-15
				12	2017-12-03	37	2017-12-28	62	2018-01-22	87	2018-02-16
				13	2017-12-04	38	2017-12-29	63	2018-01-23	88	2018-02-17
				14	2017-12-05	39	2017-12-30	64	2018-01-24	89	2018-02-18
				15	2017-12-06	40	2017-12-31	65	2018-01-25	90	2018-02-19
				16	2017-12-07	41	2018-01-01	66	2018-01-26	91	2018-02-20
				17	2017-12-08	42	2018-01-02	67	2018-01-27	92	2018-02-21
				18	2017-12-09	43	2018-01-03	68	2018-01-28	93	2018-02-22
				19	2017-12-10	44	2018-01-04	69	2018-01-29	94	2018-02-23
				20	2017-12-11	45	2018-01-05	70	2018-01-30	95	2018-02-24
				21	2017-12-12	46	2018-01-06	71	2018-01-31	96	2018-02-25
				22	2017-12-13	47	2018-01-07	72	2018-02-01	97	2018-02-26
				23	2017-12-14	48	2018-01-08	73	2018-02-02	98	2018-02-27
				24	2017-12-15	49	2018-01-09	74	2018-02-03	99	2018-02-28
				25	2017-12-16	50	2018-01-10	75	2018-02-04	100	2018-03-01
	1	2	3	4	5	6	7	8	9	10
condition	InR (RU+)	InR (RU-)	W1118 (RU+)	W1118 (RU-)	InR active (RU+)	InR active (RU-)	InR DN (RU+)	InR DN (RU-)	condition i	condition j
container	vials	vials	vials	vials	vials	vials	vials	vials	vials	vials
flies per container	15	15	15	15	15	15	15	15	10	10
# containers	7	7	5	4	7	6	5	5	10	10
calculated start #	105	105	75	60	105	90	75	75	100	100
total deaths	109	2	80	5	113	3	75	2	0	0
total censors	0	0	0	3	0	0	0	3	0	0
actual start #	109	2	80	8	113	3	75	5	0	0
condition	InR (RU+)	InR (RU-)	W1118 (RU+)	W1118 (RU-)	InR active (RU+)	InR active (RU-)	InR DN (RU+)	InR DN (RU-)	condition i	condition j	condition
gender	female	female	female	female	female	female	female	female	female	female	gender
mating status	mated 48h	mated 48h	mated 48h	mated 48h	mated 48h	mated 48h	mated 48h	mated 48h	mated 48h	mated 48h	mating status
Wolbachia infected	Yes	Yes	Yes	Yes	Yes	Yes	Yes	Yes	Yes	Yes	Wolbachia infected
temperature	25 C	25 C	25 C	25 C	25 C	25 C	25 C	25 C	25 C	25 C	temperature
base food	1 SY	1 SY	1 SY	1 SY	1 SY	1 SY	1 SY	1 SY	1 SY	1 SY	base food
yeast batch											yeast batch
food addition											food addition
other envir. descriptor 1											other envir. descriptor 1
other envir. descriptor 2											other envir. descriptor 2
other envir. descriptor 3											other envir. descriptor 3
background / strain	w1118	w1118	w1118	w1118	w1118	w1118	w1118	w1118	Dahomey	Dahomey	background / strain
genetic alteration 1											genetic alteration 1
genetic alteration 2											genetic alteration 2
genetic alteration 3											genetic alteration 3

## Sheet: stats
Gr100 InR alleles				note: values will only be accurate at the end of the experiment
chi-squared values
		InR (RU+)	InR (RU-)	W1118 (RU+)	W1118 (RU-)	InR active (RU+)	InR active (RU-)	InR DN (RU+)	InR DN (RU-)	condition i	condition j
	InR (RU+)		3.938	34.852	17.038	3.11973	0.934681	43.2388	6.63709	#DIV/0!	#DIV/0!
	InR (RU-)			12.093	2.59824	5.07438	0.450858	11.0145	0.96	#DIV/0!	#DIV/0!
	W1118 (RU+)				21.4423	45.38	3.46395	2.73233	23.7385	#DIV/0!	#DIV/0!
	W1118 (RU-)					17.0607	4.53364	20.6137	0.429708	#DIV/0!	#DIV/0!
	InR active (RU+)						1.78166	60.6679	3.34728	#DIV/0!	#DIV/0!
	InR active (RU-)							3.70538	1.53167	#DIV/0!	#DIV/0!
	InR DN (RU+)								17.1285	#DIV/0!	#DIV/0!
	InR DN (RU-)									#DIV/0!	#DIV/0!
	condition i										#DIV/0!
	condition j
chi-squared p-value for log-rank test on survivorship data
		InR (RU+)	InR (RU-)	W1118 (RU+)	W1118 (RU-)	InR active (RU+)	InR active (RU-)	InR DN (RU+)	InR DN (RU-)	condition i	condition j
	median (d)	11.5	0	9	0	11.5	0	9	0	0	0
	mean (d)	14.7431	0.647619	10.5375	3.08621	17.0796	0.666667	9.85333	0.533333	0	0
	maximum (d)	32	0	11.5	0	32	0	17	0	0	0
	InR (RU+)		0.0472069	3.55751e-09	3.66385e-05	0.0773497	0.333649	4.84501e-11	0.00998772	#DIV/0!	#DIV/0!
	InR (RU-)			0.000506126	0.106982	0.024282	0.501928	0.000904031	0.327187	#DIV/0!	#DIV/0!
	W1118 (RU+)				3.64632e-06	1.62286e-11	0.0627202	0.0983355	1.10355e-06	#DIV/0!	#DIV/0!
	W1118 (RU-)					3.6204e-05	0.0332349	5.61916e-06	0.512132	#DIV/0!	#DIV/0!
	InR active (RU+)						0.181946	6.75626e-15	0.0673162	#DIV/0!	#DIV/0!
	InR active (RU-)							0.0542374	0.215862	#DIV/0!	#DIV/0!
	InR DN (RU+)								3.49342e-05	#DIV/0!	#DIV/0!
	InR DN (RU-)									#DIV/0!	#DIV/0!
	condition i										#DIV/0!
	condition j

## Sheet: cumulative dths per bottle
			deaths
				bottle number
	date	time	day	1	2	3	4	5	6	7	8	9	10	11	12	13	14	15	16	17	18	19	20	21	22	23	24	25	26	27	28	29	30	31	32	33	34	35	36	37	38	39	40	41	42	43	44	45	46
	2017-11-21	1899-12-31 12:00:00		14	17	16	15	16	17	14	0	0	0	0	0	0	0	0	0	0	0	0	0	0	1	0	0	0	0	1	0	0	0	0	0	0	0	0	0	0	0	0	0	16	18	15	16	15	0
1	2017-11-24	1899-12-31 12:00:00	3	0	0	0	0	0	0	0	0	0	0	0	0	0	0	0	0	0	0	0	0	0	0	0	0	0	0	0	0	0	0	0	0	0	0	0	0	0	0	0	0	0	0	0	0	0	0
2	2017-11-27	1899-12-31 12:00:00	6	1	1	0	0	1	0	0	0	0	0	0	0	0	0	0	0	0	0	0	0	0	0	0	0	0	0	0	0	0	0	0	0	0	0	0	0	0	0	0	0	2	3	2	2	2	0
3	2017-11-29	1899-12-31 12:00:00	8	0	1	1	2	0	1	0	0	0	0	0	0	0	0	0	0	0	0	0	0	0	0	0	0	0	0	0	0	0	0	0	0	0	0	0	0	0	0	0	0	1	3	2	0	1	0
4	2017-12-01	1899-12-31 12:00:00	10	3	2	6	1	3	6	5	0	0	0	0	0	0	0	0	0	0	0	0	0	0	0	0	0	0	0	0	0	0	0	0	0	0	0	0	0	0	0	0	0	5	6	7	8	8	0
5	2017-12-04	1899-12-31 12:00:00	13	4	5	4	9	9	4	3	0	0	0	0	0	0	0	0	0	0	0	0	0	0	0	0	0	0	0	0	0	0	0	0	0	0	0	0	0	0	0	0	0	8	3	4	5	4	0
6	2017-12-06	1899-12-31 12:00:00	15	3	2	1	1	1	3	2	0	0	0	0	0	0	0	0	0	0	0	0	0	0	0	0	0	0	0	0	0	0	0	0	0	0	0	0	0	0	0	0	0	0	0	0	1	0	0
7	2017-12-08	1899-12-31 12:00:00	17	1	0	0	1	1	0	2	0	0	0	0	0	0	0	0	0	0	0	0	0	0	0	0	0	0	0	0	0	0	0	0	0	0	0	0	0	0	0	0	0	0	2	0	0	0	0
8	2017-12-11	1899-12-31 12:00:00	20	1	1	1	0	1	0	0	0	0	0	0	0	0	0	0	0	0	0	0	0	0	0	0	0	0	0	0	0	0	0	0	0	0	0	0	0	0	0	0	0	0	1	0	0	0	0
9	2017-12-13	1899-12-31 12:00:00	22	0	3	0	0	0	0	1	0	0	0	0	0	0	0	0	0	0	0	0	0	0	0	0	0	0	0	0	0	0	0	0	0	0	0	0	0	0	0	0	0	0	0	0	0	0	0
10	2017-12-15	1899-12-31 12:00:00	24	0	0	1	0	0	2	0	0	0	0	0	0	0	0	0	0	0	0	0	0	0	0	0	0	0	0	0	0	0	0	0	0	0	0	0	0	0	0	0	0	0	0	0	0	0	0
11	2017-12-18	1899-12-31 12:00:00	27	0	0	0	0	0	0	0	0	0	0	0	0	0	0	0	0	0	0	0	0	0	0	0	0	0	0	0	0	0	0	0	0	0	0	0	0	0	0	0	0	0	0	0	0	0	0
12	2017-12-20	1899-12-31 12:00:00	29	0	0	0	0	0	0	0	0	0	0	0	0	0	0	0	0	0	0	0	0	0	0	0	0	0	0	1	0	0	0	0	0	0	0	0	0	0	0	0	0	0	0	0	0	0	0
13	2017-12-22	1899-12-31 12:00:00	31	1	0	1	0	0	0	0	0	0	0	0	0	0	0	0	0	0	0	0	0	0	0	0	0	0	0	0	0	0	0	0	0	0	0	0	0	0	0	0	0	0	0	0	0	0	0
14	2017-12-24	1899-12-31 12:00:00	33	0	2	0	0	0	0	1	0	0	0	0	0	0	0	0	0	0	0	0	0	0	0	0	0	0	0	0	0	0	0	0	0	0	0	0	0	0	0	0	0	0	0	0	0	0	0
15	2017-12-27	1899-12-31 12:00:00	36	0	0	1	0	0	1	0	0	0	0	0	0	0	0	0	0	0	0	0	0	0	0	0	0	0	0	0	0	0	0	0	0	0	0	0	0	0	0	0	0	0	0	0	0	0	0
16	2017-12-30	1899-12-31 12:00:00	39	0	0	0	0	0	0	0	0	0	0	0	0	0	0	0	0	0	0	0	0	0	1	0	0	0	0	0	0	0	0	0	0	0	0	0	0	0	0	0	0	0	0	0	0	0	0
17	2018-01-02	1899-12-31 12:00:00	42	0	0	0	1	0	0	0	0	0	0	0	0	0	0	0	0	0	0	0	0	0	0	0	0	0	0	0	0	0	0	0	0	0	0	0	0	0	0	0	0	0	0	0	0	0	0
18	2000-01-01	1899-12-31 12:00:00	42	0	0	0	0	0	0	0	0	0	0	0	0	0	0	0	0	0	0	0	0	0	0	0	0	0	0	0	0	0	0	0	0	0	0	0	0	0	0	0	0	0	0	0	0	0	0
19	2000-01-01	1899-12-31 12:00:00	42	0	0	0	0	0	0	0	0	0	0	0	0	0	0	0	0	0	0	0	0	0	0	0	0	0	0	0	0	0	0	0	0	0	0	0	0	0	0	0	0	0	0	0	0	0	0
20	2000-01-01	1899-12-31 12:00:00	42	0	0	0	0	0	0	0	0	0	0	0	0	0	0	0	0	0	0	0	0	0	0	0	0	0	0	0	0	0	0	0	0	0	0	0	0	0	0	0	0	0	0	0	0	0	0
21	2000-01-01	1899-12-31 12:00:00	42	0	0	0	0	0	0	0	0	0	0	0	0	0	0	0	0	0	0	0	0	0	0	0	0	0	0	0	0	0	0	0	0	0	0	0	0	0	0	0	0	0	0	0	0	0	0
22	2000-01-01	1899-12-31 12:00:00	42	0	0	0	0	0	0	0	0	0	0	0	0	0	0	0	0	0	0	0	0	0	0	0	0	0	0	0	0	0	0	0	0	0	0	0	0	0	0	0	0	0	0	0	0	0	0
23	2000-01-01	1899-12-31 12:00:00	42	0	0	0	0	0	0	0	0	0	0	0	0	0	0	0	0	0	0	0	0	0	0	0	0	0	0	0	0	0	0	0	0	0	0	0	0	0	0	0	0	0	0	0	0	0	0
24	2000-01-01	1899-12-31 12:00:00	42	0	0	0	0	0	0	0	0	0	0	0	0	0	0	0	0	0	0	0	0	0	0	0	0	0	0	0	0	0	0	0	0	0	0	0	0	0	0	0	0	0	0	0	0	0	0
25	2000-01-01	1899-12-31 12:00:00	42	0	0	0	0	0	0	0	0	0	0	0	0	0	0	0	0	0	0	0	0	0	0	0	0	0	0	0	0	0	0	0	0	0	0	0	0	0	0	0	0	0	0	0	0	0	0
26	2000-01-01	1899-12-31 12:00:00	42	0	0	0	0	0	0	0	0	0	0	0	0	0	0	0	0	0	0	0	0	0	0	0	0	0	0	0	0	0	0	0	0	0	0	0	0	0	0	0	0	0	0	0	0	0	0
27	2000-01-01	1899-12-31 12:00:00	42	0	0	0	0	0	0	0	0	0	0	0	0	0	0	0	0	0	0	0	0	0	0	0	0	0	0	0	0	0	0	0	0	0	0	0	0	0	0	0	0	0	0	0	0	0	0
28	2000-01-01	1899-12-31 12:00:00	42	0	0	0	0	0	0	0	0	0	0	0	0	0	0	0	0	0	0	0	0	0	0	0	0	0	0	0	0	0	0	0	0	0	0	0	0	0	0	0	0	0	0	0	0	0	0
29	2000-01-01	1899-12-31 12:00:00	42	0	0	0	0	0	0	0	0	0	0	0	0	0	0	0	0	0	0	0	0	0	0	0	0	0	0	0	0	0	0	0	0	0	0	0	0	0	0	0	0	0	0	0	0	0	0
30	2000-01-01	1899-12-31 12:00:00	42	0	0	0	0	0	0	0	0	0	0	0	0	0	0	0	0	0	0	0	0	0	0	0	0	0	0	0	0	0	0	0	0	0	0	0	0	0	0	0	0	0	0	0	0	0	0
31	2000-01-01	1899-12-31 12:00:00	42	0	0	0	0	0	0	0	0	0	0	0	0	0	0	0	0	0	0	0	0	0	0	0	0	0	0	0	0	0	0	0	0	0	0	0	0	0	0	0	0	0	0	0	0	0	0
32	2000-01-01	1899-12-31 12:00:00	42	0	0	0	0	0	0	0	0	0	0	0	0	0	0	0	0	0	0	0	0	0	0	0	0	0	0	0	0	0	0	0	0	0	0	0	0	0	0	0	0	0	0	0	0	0	0
33	2000-01-01	1899-12-31 12:00:00	42	0	0	0	0	0	0	0	0	0	0	0	0	0	0	0	0	0	0	0	0	0	0	0	0	0	0	0	0	0	0	0	0	0	0	0	0	0	0	0	0	0	0	0	0	0	0
34	2000-01-01	1899-12-31 12:00:00	42	0	0	0	0	0	0	0	0	0	0	0	0	0	0	0	0	0	0	0	0	0	0	0	0	0	0	0	0	0	0	0	0	0	0	0	0	0	0	0	0	0	0	0	0	0	0
35	2000-01-01	1899-12-31 12:00:00	42	0	0	0	0	0	0	0	0	0	0	0	0	0	0	0	0	0	0	0	0	0	0	0	0	0	0	0	0	0	0	0	0	0	0	0	0	0	0	0	0	0	0	0	0	0	0
36	2000-01-01	1899-12-31 12:00:00	42	0	0	0	0	0	0	0	0	0	0	0	0	0	0	0	0	0	0	0	0	0	0	0	0	0	0	0	0	0	0	0	0	0	0	0	0	0	0	0	0	0	0	0	0	0	0
37	2000-01-01	1899-12-31 12:00:00	42	0	0	0	0	0	0	0	0	0	0	0	0	0	0	0	0	0	0	0	0	0	0	0	0	0	0	0	0	0	0	0	0	0	0	0	0	0	0	0	0	0	0	0	0	0	0
38	2000-01-01	1899-12-31 12:00:00	42	0	0	0	0	0	0	0	0	0	0	0	0	0	0	0	0	0	0	0	0	0	0	0	0	0	0	0	0	0	0	0	0	0	0	0	0	0	0	0	0	0	0	0	0	0	0
39	2000-01-01	1899-12-31 12:00:00	42	0	0	0	0	0	0	0	0	0	0	0	0	0	0	0	0	0	0	0	0	0	0	0	0	0	0	0	0	0	0	0	0	0	0	0	0	0	0	0	0	0	0	0	0	0	0
40	2000-01-01	1899-12-31 12:00:00	42	0	0	0	0	0	0	0	0	0	0	0	0	0	0	0	0	0	0	0	0	0	0	0	0	0	0	0	0	0	0	0	0	0	0	0	0	0	0	0	0	0	0	0	0	0	0
41	2000-01-01	1899-12-31 12:00:00	42	0	0	0	0	0	0	0	0	0	0	0	0	0	0	0	0	0	0	0	0	0	0	0	0	0	0	0	0	0	0	0	0	0	0	0	0	0	0	0	0	0	0	0	0	0	0
42	2000-01-01	1899-12-31 12:00:00	42	0	0	0	0	0	0	0	0	0	0	0	0	0	0	0	0	0	0	0	0	0	0	0	0	0	0	0	0	0	0	0	0	0	0	0	0	0	0	0	0	0	0	0	0	0	0
43	2000-01-01	1899-12-31 12:00:00	42	0	0	0	0	0	0	0	0	0	0	0	0	0	0	0	0	0	0	0	0	0	0	0	0	0	0	0	0	0	0	0	0	0	0	0	0	0	0	0	0	0	0	0	0	0	0
44	2000-01-01	1899-12-31 12:00:00	42	0	0	0	0	0	0	0	0	0	0	0	0	0	0	0	0	0	0	0	0	0	0	0	0	0	0	0	0	0	0	0	0	0	0	0	0	0	0	0	0	0	0	0	0	0	0
45	2000-01-01	1899-12-31 12:00:00	42	0	0	0	0	0	0	0	0	0	0	0	0	0	0	0	0	0	0	0	0	0	0	0	0	0	0	0	0	0	0	0	0	0	0	0	0	0	0	0	0	0	0	0	0	0	0
46	2000-01-01	1899-12-31 12:00:00	42	0	0	0	0	0	0	0	0	0	0	0	0	0	0	0	0	0	0	0	0	0	0	0	0	0	0	0	0	0	0	0	0	0	0	0	0	0	0	0	0	0	0	0	0	0	0
47	2000-01-01	1899-12-31 12:00:00	42	0	0	0	0	0	0	0	0	0	0	0	0	0	0	0	0	0	0	0	0	0	0	0	0	0	0	0	0	0	0	0	0	0	0	0	0	0	0	0	0	0	0	0	0	0	0
48	2000-01-01	1899-12-31 12:00:00	42	0	0	0	0	0	0	0	0	0	0	0	0	0	0	0	0	0	0	0	0	0	0	0	0	0	0	0	0	0	0	0	0	0	0	0	0	0	0	0	0	0	0	0	0	0	0
49	2000-01-01	1899-12-31 12:00:00	42	0	0	0	0	0	0	0	0	0	0	0	0	0	0	0	0	0	0	0	0	0	0	0	0	0	0	0	0	0	0	0	0	0	0	0	0	0	0	0	0	0	0	0	0	0	0
50	2000-01-01	1899-12-31 12:00:00	42	0	0	0	0	0	0	0	0	0	0	0	0	0	0	0	0	0	0	0	0	0	0	0	0	0	0	0	0	0	0	0	0	0	0	0	0	0	0	0	0	0	0	0	0	0	0
51	2000-01-01	1899-12-31 12:00:00	42	0	0	0	0	0	0	0	0	0	0	0	0	0	0	0	0	0	0	0	0	0	0	0	0	0	0	0	0	0	0	0	0	0	0	0	0	0	0	0	0	0	0	0	0	0	0
52	2000-01-01	1899-12-31 12:00:00	42	0	0	0	0	0	0	0	0	0	0	0	0	0	0	0	0	0	0	0	0	0	0	0	0	0	0	0	0	0	0	0	0	0	0	0	0	0	0	0	0	0	0	0	0	0	0
53	2000-01-01	1899-12-31 12:00:00	42	0	0	0	0	0	0	0	0	0	0	0	0	0	0	0	0	0	0	0	0	0	0	0	0	0	0	0	0	0	0	0	0	0	0	0	0	0	0	0	0	0	0	0	0	0	0
54	2000-01-01	1899-12-31 12:00:00	42	0	0	0	0	0	0	0	0	0	0	0	0	0	0	0	0	0	0	0	0	0	0	0	0	0	0	0	0	0	0	0	0	0	0	0	0	0	0	0	0	0	0	0	0	0	0
55	2000-01-01	1899-12-31 12:00:00	42	0	0	0	0	0	0	0	0	0	0	0	0	0	0	0	0	0	0	0	0	0	0	0	0	0	0	0	0	0	0	0	0	0	0	0	0	0	0	0	0	0	0	0	0	0	0
56	2000-01-01	1899-12-31 12:00:00	42	0	0	0	0	0	0	0	0	0	0	0	0	0	0	0	0	0	0	0	0	0	0	0	0	0	0	0	0	0	0	0	0	0	0	0	0	0	0	0	0	0	0	0	0	0	0
57	2000-01-01	1899-12-31 12:00:00	42	0	0	0	0	0	0	0	0	0	0	0	0	0	0	0	0	0	0	0	0	0	0	0	0	0	0	0	0	0	0	0	0	0	0	0	0	0	0	0	0	0	0	0	0	0	0
58	2000-01-01	1899-12-31 12:00:00	42	0	0	0	0	0	0	0	0	0	0	0	0	0	0	0	0	0	0	0	0	0	0	0	0	0	0	0	0	0	0	0	0	0	0	0	0	0	0	0	0	0	0	0	0	0	0
59	2000-01-01	1899-12-31 12:00:00	42	0	0	0	0	0	0	0	0	0	0	0	0	0	0	0	0	0	0	0	0	0	0	0	0	0	0	0	0	0	0	0	0	0	0	0	0	0	0	0	0	0	0	0	0	0	0
60	2000-01-01	1899-12-31 12:00:00	42	0	0	0	0	0	0	0	0	0	0	0	0	0	0	0	0	0	0	0	0	0	0	0	0	0	0	0	0	0	0	0	0	0	0	0	0	0	0	0	0	0	0	0	0	0	0
61	2000-01-01	1899-12-31 12:00:00	42	0	0	0	0	0	0	0	0	0	0	0	0	0	0	0	0	0	0	0	0	0	0	0	0	0	0	0	0	0	0	0	0	0	0	0	0	0	0	0	0	0	0	0	0	0	0
62	2000-01-01	1899-12-31 12:00:00	42	0	0	0	0	0	0	0	0	0	0	0	0	0	0	0	0	0	0	0	0	0	0	0	0	0	0	0	0	0	0	0	0	0	0	0	0	0	0	0	0	0	0	0	0	0	0
63	2000-01-01	1899-12-31 12:00:00	42	0	0	0	0	0	0	0	0	0	0	0	0	0	0	0	0	0	0	0	0	0	0	0	0	0	0	0	0	0	0	0	0	0	0	0	0	0	0	0	0	0	0	0	0	0	0
64	2000-01-01	1899-12-31 12:00:00	42	0	0	0	0	0	0	0	0	0	0	0	0	0	0	0	0	0	0	0	0	0	0	0	0	0	0	0	0	0	0	0	0	0	0	0	0	0	0	0	0	0	0	0	0	0	0
65	2000-01-01	1899-12-31 12:00:00	42	0	0	0	0	0	0	0	0	0	0	0	0	0	0	0	0	0	0	0	0	0	0	0	0	0	0	0	0	0	0	0	0	0	0	0	0	0	0	0	0	0	0	0	0	0	0
66	2000-01-01	1899-12-31 12:00:00	42	0	0	0	0	0	0	0	0	0	0	0	0	0	0	0	0	0	0	0	0	0	0	0	0	0	0	0	0	0	0	0	0	0	0	0	0	0	0	0	0	0	0	0	0	0	0
67	2000-01-01	1899-12-31 12:00:00	42	0	0	0	0	0	0	0	0	0	0	0	0	0	0	0	0	0	0	0	0	0	0	0	0	0	0	0	0	0	0	0	0	0	0	0	0	0	0	0	0	0	0	0	0	0	0
68	2000-01-01	1899-12-31 12:00:00	42	0	0	0	0	0	0	0	0	0	0	0	0	0	0	0	0	0	0	0	0	0	0	0	0	0	0	0	0	0	0	0	0	0	0	0	0	0	0	0	0	0	0	0	0	0	0
69	2000-01-01	1899-12-31 12:00:00	42	0	0	0	0	0	0	0	0	0	0	0	0	0	0	0	0	0	0	0	0	0	0	0	0	0	0	0	0	0	0	0	0	0	0	0	0	0	0	0	0	0	0	0	0	0	0
70	2000-01-01	1899-12-31 12:00:00	42	0	0	0	0	0	0	0	0	0	0	0	0	0	0	0	0	0	0	0	0	0	0	0	0	0	0	0	0	0	0	0	0	0	0	0	0	0	0	0	0	0	0	0	0	0	0
71	2000-01-01	1899-12-31 12:00:00	42	0	0	0	0	0	0	0	0	0	0	0	0	0	0	0	0	0	0	0	0	0	0	0	0	0	0	0	0	0	0	0	0	0	0	0	0	0	0	0	0	0	0	0	0	0	0
72	2000-01-01	1899-12-31 12:00:00	42	0	0	0	0	0	0	0	0	0	0	0	0	0	0	0	0	0	0	0	0	0	0	0	0	0	0	0	0	0	0	0	0	0	0	0	0	0	0	0	0	0	0	0	0	0	0
73	2000-01-01	1899-12-31 12:00:00	42	0	0	0	0	0	0	0	0	0	0	0	0	0	0	0	0	0	0	0	0	0	0	0	0	0	0	0	0	0	0	0	0	0	0	0	0	0	0	0	0	0	0	0	0	0	0
74	2000-01-01	1899-12-31 12:00:00	42	0	0	0	0	0	0	0	0	0	0	0	0	0	0	0	0	0	0	0	0	0	0	0	0	0	0	0	0	0	0	0	0	0	0	0	0	0	0	0	0	0	0	0	0	0	0
75	2000-01-01	1899-12-31 12:00:00	42	0	0	0	0	0	0	0	0	0	0	0	0	0	0	0	0	0	0	0	0	0	0	0	0	0	0	0	0	0	0	0	0	0	0	0	0	0	0	0	0	0	0	0	0	0	0
				14	17	16	15	16	17	14	0	0	0	0	0	0	0	0	0	0	0	0	0	0	1	0	0	0	0	1	0	0	0	0	0	0	0	0	0	0	0	0	0	16	18	15	16	15	0
		censors
				1	2	3	4	5	6	7	8	9	10	11	12	13	14	15	16	17	18	19	20	21	22	23	24	25	26	27	28	29	30	31	32	33	34	35	36	37	38	39	40	41	42	43	44	45	46
1	2017-11-24	1899-12-31 12:00:00	3	0	0	0	0	0	0	0	0	0	0	0	0	0	0	0	0	0	0	0	0	0	0	0	0	0	0	0	0	0	0	0	0	0	0	0	0	0	0	0	0	0	0	0	0	0	0
2	2017-11-27	1899-12-31 12:00:00	6	0	0	0	0	0	0	0	0	0	0	0	0	0	0	0	0	0	0	0	0	0	0	0	0	0	0	0	0	0	0	0	0	0	0	0	0	0	0	0	0	0	0	0	0	0	0
3	2017-11-29	1899-12-31 12:00:00	8	0	0	0	0	0	0	0	0	0	0	0	0	0	0	0	0	0	0	0	0	0	0	0	0	0	0	0	0	0	0	0	0	0	0	0	0	0	0	0	0	0	0	0	0	0	0
4	2017-12-01	1899-12-31 12:00:00	10	0	0	0	0	0	0	0	0	0	0	0	0	0	0	0	0	0	0	0	0	0	0	0	0	0	0	0	0	0	0	0	0	0	0	0	0	0	0	0	0	0	0	0	0	0	0
5	2017-12-04	1899-12-31 12:00:00	13	0	0	0	0	0	0	0	0	0	0	0	0	0	0	0	0	0	0	0	0	0	0	0	0	0	0	0	0	0	0	0	0	0	0	0	0	0	0	0	0	0	0	0	0	0	0
6	2017-12-06	1899-12-31 12:00:00	15	0	0	0	0	0	0	0	0	0	0	0	0	0	0	0	0	0	0	0	0	0	0	0	0	0	0	0	0	0	0	0	0	0	0	0	0	0	0	0	0	0	0	0	0	0	0
7	2017-12-08	1899-12-31 12:00:00	17	0	0	0	0	0	0	0	0	0	0	0	0	0	0	0	0	0	0	0	0	0	0	0	0	0	0	0	0	0	0	0	0	0	0	0	0	0	0	0	0	0	0	0	0	0	0
8	2017-12-11	1899-12-31 12:00:00	20	0	0	0	0	0	0	0	0	0	0	0	0	0	0	0	0	0	0	0	0	0	0	0	0	0	0	0	0	0	0	0	0	0	0	0	0	0	0	0	0	0	0	0	0	0	0
9	2017-12-13	1899-12-31 12:00:00	22	0	0	0	0	0	0	0	0	0	0	0	0	0	0	0	0	0	0	0	0	0	0	0	0	0	0	0	0	0	0	0	0	0	0	0	0	0	0	0	0	0	0	0	0	0	0
10	2017-12-15	1899-12-31 12:00:00	24	0	0	0	0	0	0	0	0	0	0	0	0	0	0	0	0	0	0	0	0	0	0	0	0	0	0	0	0	0	0	0	0	0	0	0	0	0	0	0	0	0	0	0	0	0	0
11	2017-12-18	1899-12-31 12:00:00	27	0	0	0	0	0	0	0	0	0	0	0	0	0	0	0	0	0	0	0	0	0	0	0	0	0	0	0	0	0	0	0	0	0	0	0	0	0	0	0	0	0	0	0	0	0	0
12	2017-12-20	1899-12-31 12:00:00	29	0	0	0	0	0	0	0	0	0	0	0	0	0	0	0	0	0	0	0	0	0	0	0	0	0	0	0	0	0	0	0	0	0	0	0	0	0	0	0	0	0	0	0	0	0	0
13	2017-12-22	1899-12-31 12:00:00	31	0	0	0	0	0	0	0	0	0	0	0	0	0	0	0	0	0	0	0	0	0	0	0	0	0	0	0	0	0	0	0	0	0	0	0	0	0	0	0	0	0	0	0	0	0	0
14	2017-12-24	1899-12-31 12:00:00	33	0	0	0	0	0	0	0	0	0	0	0	0	0	0	0	0	0	0	0	0	0	0	0	0	0	0	0	0	0	0	0	0	0	0	0	0	0	0	0	0	0	0	0	0	0	0
15	2017-12-27	1899-12-31 12:00:00	36	0	0	0	0	0	0	0	0	0	0	0	0	0	0	0	0	0	0	0	0	0	0	0	0	0	0	0	0	0	0	0	0	0	0	0	0	0	0	0	0	0	0	0	0	0	0
16	2017-12-30	1899-12-31 12:00:00	39	0	0	0	0	0	0	0	0	0	0	0	0	0	0	0	0	0	0	0	0	0	0	0	0	0	0	0	0	0	0	0	0	0	0	0	0	0	0	0	0	0	0	0	0	0	0
17	2018-01-02	1899-12-31 12:00:00	42	0	0	0	0	0	0	0	0	0	0	0	0	0	0	0	0	0	0	0	0	0	0	0	0	0	0	0	0	0	0	0	0	0	0	0	0	0	0	0	0	0	0	0	0	0	0
18	2000-01-01	1899-12-31 12:00:00	42	0	0	0	0	0	0	0	0	0	0	0	0	0	0	0	0	0	0	0	0	0	0	0	0	0	0	0	0	0	0	0	0	0	0	0	0	0	0	0	0	0	0	0	0	0	0
19	2000-01-01	1899-12-31 12:00:00	42	0	0	0	0	0	0	0	0	0	0	0	0	0	0	0	0	0	0	0	0	0	0	0	0	0	0	0	0	0	0	0	0	0	0	0	0	0	0	0	0	0	0	0	0	0	0
20	2000-01-01	1899-12-31 12:00:00	42	0	0	0	0	0	0	0	0	0	0	0	0	0	0	0	0	0	0	0	0	0	0	0	0	0	0	0	0	0	0	0	0	0	0	0	0	0	0	0	0	0	0	0	0	0	0
21	2000-01-01	1899-12-31 12:00:00	42	0	0	0	0	0	0	0	0	0	0	0	0	0	0	0	0	0	0	0	0	0	0	0	0	0	0	0	0	0	0	0	0	0	0	0	0	0	0	0	0	0	0	0	0	0	0
22	2000-01-01	1899-12-31 12:00:00	42	0	0	0	0	0	0	0	0	0	0	0	0	0	0	0	0	0	0	0	0	0	0	0	0	0	0	0	0	0	0	0	0	0	0	0	0	0	0	0	0	0	0	0	0	0	0
23	2000-01-01	1899-12-31 12:00:00	42	0	0	0	0	0	0	0	0	0	0	0	0	0	0	0	0	0	0	0	0	0	0	0	0	0	0	0	0	0	0	0	0	0	0	0	0	0	0	0	0	0	0	0	0	0	0
24	2000-01-01	1899-12-31 12:00:00	42	0	0	0	0	0	0	0	0	0	0	0	0	0	0	0	0	0	0	0	0	0	0	0	0	0	0	0	0	0	0	0	0	0	0	0	0	0	0	0	0	0	0	0	0	0	0
25	2000-01-01	1899-12-31 12:00:00	42	0	0	0	0	0	0	0	0	0	0	0	0	0	0	0	0	0	0	0	0	0	0	0	0	0	0	0	0	0	0	0	0	0	0	0	0	0	0	0	0	0	0	0	0	0	0
26	2000-01-01	1899-12-31 12:00:00	42	0	0	0	0	0	0	0	0	0	0	0	0	0	0	0	0	0	0	0	0	0	0	0	0	0	0	0	0	0	0	0	0	0	0	0	0	0	0	0	0	0	0	0	0	0	0
27	2000-01-01	1899-12-31 12:00:00	42	0	0	0	0	0	0	0	0	0	0	0	0	0	0	0	0	0	0	0	0	0	0	0	0	0	0	0	0	0	0	0	0	0	0	0	0	0	0	0	0	0	0	0	0	0	0
28	2000-01-01	1899-12-31 12:00:00	42	0	0	0	0	0	0	0	0	0	0	0	0	0	0	0	0	0	0	0	0	0	0	0	0	0	0	0	0	0	0	0	0	0	0	0	0	0	0	0	0	0	0	0	0	0	0
29	2000-01-01	1899-12-31 12:00:00	42	0	0	0	0	0	0	0	0	0	0	0	0	0	0	0	0	0	0	0	0	0	0	0	0	0	0	0	0	0	0	0	0	0	0	0	0	0	0	0	0	0	0	0	0	0	0
30	2000-01-01	1899-12-31 12:00:00	42	0	0	0	0	0	0	0	0	0	0	0	0	0	0	0	0	0	0	0	0	0	0	0	0	0	0	0	0	0	0	0	0	0	0	0	0	0	0	0	0	0	0	0	0	0	0
31	2000-01-01	1899-12-31 12:00:00	42	0	0	0	0	0	0	0	0	0	0	0	0	0	0	0	0	0	0	0	0	0	0	0	0	0	0	0	0	0	0	0	0	0	0	0	0	0	0	0	0	0	0	0	0	0	0
32	2000-01-01	1899-12-31 12:00:00	42	0	0	0	0	0	0	0	0	0	0	0	0	0	0	0	0	0	0	0	0	0	0	0	0	0	0	0	0	0	0	0	0	0	0	0	0	0	0	0	0	0	0	0	0	0	0
33	2000-01-01	1899-12-31 12:00:00	42	0	0	0	0	0	0	0	0	0	0	0	0	0	0	0	0	0	0	0	0	0	0	0	0	0	0	0	0	0	0	0	0	0	0	0	0	0	0	0	0	0	0	0	0	0	0
34	2000-01-01	1899-12-31 12:00:00	42	0	0	0	0	0	0	0	0	0	0	0	0	0	0	0	0	0	0	0	0	0	0	0	0	0	0	0	0	0	0	0	0	0	0	0	0	0	0	0	0	0	0	0	0	0	0
35	2000-01-01	1899-12-31 12:00:00	42	0	0	0	0	0	0	0	0	0	0	0	0	0	0	0	0	0	0	0	0	0	0	0	0	0	0	0	0	0	0	0	0	0	0	0	0	0	0	0	0	0	0	0	0	0	0
36	2000-01-01	1899-12-31 12:00:00	42	0	0	0	0	0	0	0	0	0	0	0	0	0	0	0	0	0	0	0	0	0	0	0	0	0	0	0	0	0	0	0	0	0	0	0	0	0	0	0	0	0	0	0	0	0	0
37	2000-01-01	1899-12-31 12:00:00	42	0	0	0	0	0	0	0	0	0	0	0	0	0	0	0	0	0	0	0	0	0	0	0	0	0	0	0	0	0	0	0	0	0	0	0	0	0	0	0	0	0	0	0	0	0	0
38	2000-01-01	1899-12-31 12:00:00	42	0	0	0	0	0	0	0	0	0	0	0	0	0	0	0	0	0	0	0	0	0	0	0	0	0	0	0	0	0	0	0	0	0	0	0	0	0	0	0	0	0	0	0	0	0	0
39	2000-01-01	1899-12-31 12:00:00	42	0	0	0	0	0	0	0	0	0	0	0	0	0	0	0	0	0	0	0	0	0	0	0	0	0	0	0	0	0	0	0	0	0	0	0	0	0	0	0	0	0	0	0	0	0	0
40	2000-01-01	1899-12-31 12:00:00	42	0	0	0	0	0	0	0	0	0	0	0	0	0	0	0	0	0	0	0	0	0	0	0	0	0	0	0	0	0	0	0	0	0	0	0	0	0	0	0	0	0	0	0	0	0	0
41	2000-01-01	1899-12-31 12:00:00	42	0	0	0	0	0	0	0	0	0	0	0	0	0	0	0	0	0	0	0	0	0	0	0	0	0	0	0	0	0	0	0	0	0	0	0	0	0	0	0	0	0	0	0	0	0	0
42	2000-01-01	1899-12-31 12:00:00	42	0	0	0	0	0	0	0	0	0	0	0	0	0	0	0	0	0	0	0	0	0	0	0	0	0	0	0	0	0	0	0	0	0	0	0	0	0	0	0	0	0	0	0	0	0	0
43	2000-01-01	1899-12-31 12:00:00	42	0	0	0	0	0	0	0	0	0	0	0	0	0	0	0	0	0	0	0	0	0	0	0	0	0	0	0	0	0	0	0	0	0	0	0	0	0	0	0	0	0	0	0	0	0	0
44	2000-01-01	1899-12-31 12:00:00	42	0	0	0	0	0	0	0	0	0	0	0	0	0	0	0	0	0	0	0	0	0	0	0	0	0	0	0	0	0	0	0	0	0	0	0	0	0	0	0	0	0	0	0	0	0	0
45	2000-01-01	1899-12-31 12:00:00	42	0	0	0	0	0	0	0	0	0	0	0	0	0	0	0	0	0	0	0	0	0	0	0	0	0	0	0	0	0	0	0	0	0	0	0	0	0	0	0	0	0	0	0	0	0	0
46	2000-01-01	1899-12-31 12:00:00	42	0	0	0	0	0	0	0	0	0	0	0	0	0	0	0	0	0	0	0	0	0	0	0	0	0	0	0	0	0	0	0	0	0	0	0	0	0	0	0	0	0	0	0	0	0	0
47	2000-01-01	1899-12-31 12:00:00	42	0	0	0	0	0	0	0	0	0	0	0	0	0	0	0	0	0	0	0	0	0	0	0	0	0	0	0	0	0	0	0	0	0	0	0	0	0	0	0	0	0	0	0	0	0	0
48	2000-01-01	1899-12-31 12:00:00	42	0	0	0	0	0	0	0	0	0	0	0	0	0	0	0	0	0	0	0	0	0	0	0	0	0	0	0	0	0	0	0	0	0	0	0	0	0	0	0	0	0	0	0	0	0	0
49	2000-01-01	1899-12-31 12:00:00	42	0	0	0	0	0	0	0	0	0	0	0	0	0	0	0	0	0	0	0	0	0	0	0	0	0	0	0	0	0	0	0	0	0	0	0	0	0	0	0	0	0	0	0	0	0	0
50	2000-01-01	1899-12-31 12:00:00	42	0	0	0	0	0	0	0	0	0	0	0	0	0	0	0	0	0	0	0	0	0	0	0	0	0	0	0	0	0	0	0	0	0	0	0	0	0	0	0	0	0	0	0	0	0	0
51	2000-01-01	1899-12-31 12:00:00	42	0	0	0	0	0	0	0	0	0	0	0	0	0	0	0	0	0	0	0	0	0	0	0	0	0	0	0	0	0	0	0	0	0	0	0	0	0	0	0	0	0	0	0	0	0	0
52	2000-01-01	1899-12-31 12:00:00	42	0	0	0	0	0	0	0	0	0	0	0	0	0	0	0	0	0	0	0	0	0	0	0	0	0	0	0	0	0	0	0	0	0	0	0	0	0	0	0	0	0	0	0	0	0	0
53	2000-01-01	1899-12-31 12:00:00	42	0	0	0	0	0	0	0	0	0	0	0	0	0	0	0	0	0	0	0	0	0	0	0	0	0	0	0	0	0	0	0	0	0	0	0	0	0	0	0	0	0	0	0	0	0	0
54	2000-01-01	1899-12-31 12:00:00	42	0	0	0	0	0	0	0	0	0	0	0	0	0	0	0	0	0	0	0	0	0	0	0	0	0	0	0	0	0	0	0	0	0	0	0	0	0	0	0	0	0	0	0	0	0	0
55	2000-01-01	1899-12-31 12:00:00	42	0	0	0	0	0	0	0	0	0	0	0	0	0	0	0	0	0	0	0	0	0	0	0	0	0	0	0	0	0	0	0	0	0	0	0	0	0	0	0	0	0	0	0	0	0	0
56	2000-01-01	1899-12-31 12:00:00	42	0	0	0	0	0	0	0	0	0	0	0	0	0	0	0	0	0	0	0	0	0	0	0	0	0	0	0	0	0	0	0	0	0	0	0	0	0	0	0	0	0	0	0	0	0	0
57	2000-01-01	1899-12-31 12:00:00	42	0	0	0	0	0	0	0	0	0	0	0	0	0	0	0	0	0	0	0	0	0	0	0	0	0	0	0	0	0	0	0	0	0	0	0	0	0	0	0	0	0	0	0	0	0	0
58	2000-01-01	1899-12-31 12:00:00	42	0	0	0	0	0	0	0	0	0	0	0	0	0	0	0	0	0	0	0	0	0	0	0	0	0	0	0	0	0	0	0	0	0	0	0	0	0	0	0	0	0	0	0	0	0	0
59	2000-01-01	1899-12-31 12:00:00	42	0	0	0	0	0	0	0	0	0	0	0	0	0	0	0	0	0	0	0	0	0	0	0	0	0	0	0	0	0	0	0	0	0	0	0	0	0	0	0	0	0	0	0	0	0	0
60	2000-01-01	1899-12-31 12:00:00	42	0	0	0	0	0	0	0	0	0	0	0	0	0	0	0	0	0	0	0	0	0	0	0	0	0	0	0	0	0	0	0	0	0	0	0	0	0	0	0	0	0	0	0	0	0	0
61	2000-01-01	1899-12-31 12:00:00	42	0	0	0	0	0	0	0	0	0	0	0	0	0	0	0	0	0	0	0	0	0	0	0	0	0	0	0	0	0	0	0	0	0	0	0	0	0	0	0	0	0	0	0	0	0	0
62	2000-01-01	1899-12-31 12:00:00	42	0	0	0	0	0	0	0	0	0	0	0	0	0	0	0	0	0	0	0	0	0	0	0	0	0	0	0	0	0	0	0	0	0	0	0	0	0	0	0	0	0	0	0	0	0	0
63	2000-01-01	1899-12-31 12:00:00	42	0	0	0	0	0	0	0	0	0	0	0	0	0	0	0	0	0	0	0	0	0	0	0	0	0	0	0	0	0	0	0	0	0	0	0	0	0	0	0	0	0	0	0	0	0	0
64	2000-01-01	1899-12-31 12:00:00	42	0	0	0	0	0	0	0	0	0	0	0	0	0	0	0	0	0	0	0	0	0	0	0	0	0	0	0	0	0	0	0	0	0	0	0	0	0	0	0	0	0	0	0	0	0	0
65	2000-01-01	1899-12-31 12:00:00	42	0	0	0	0	0	0	0	0	0	0	0	0	0	0	0	0	0	0	0	0	0	0	0	0	0	0	0	0	0	0	0	0	0	0	0	0	0	0	0	0	0	0	0	0	0	0
66	2000-01-01	1899-12-31 12:00:00	42	0	0	0	0	0	0	0	0	0	0	0	0	0	0	0	0	0	0	0	0	0	0	0	0	0	0	0	0	0	0	0	0	0	0	0	0	0	0	0	0	0	0	0	0	0	0
67	2000-01-01	1899-12-31 12:00:00	42	0	0	0	0	0	0	0	0	0	0	0	0	0	0	0	0	0	0	0	0	0	0	0	0	0	0	0	0	0	0	0	0	0	0	0	0	0	0	0	0	0	0	0	0	0	0
68	2000-01-01	1899-12-31 12:00:00	42	0	0	0	0	0	0	0	0	0	0	0	0	0	0	0	0	0	0	0	0	0	0	0	0	0	0	0	0	0	0	0	0	0	0	0	0	0	0	0	0	0	0	0	0	0	0
69	2000-01-01	1899-12-31 12:00:00	42	0	0	0	0	0	0	0	0	0	0	0	0	0	0	0	0	0	0	0	0	0	0	0	0	0	0	0	0	0	0	0	0	0	0	0	0	0	0	0	0	0	0	0	0	0	0
70	2000-01-01	1899-12-31 12:00:00	42	0	0	0	0	0	0	0	0	0	0	0	0	0	0	0	0	0	0	0	0	0	0	0	0	0	0	0	0	0	0	0	0	0	0	0	0	0	0	0	0	0	0	0	0	0	0
71	2000-01-01	1899-12-31 12:00:00	42	0	0	0	0	0	0	0	0	0	0	0	0	0	0	0	0	0	0	0	0	0	0	0	0	0	0	0	0	0	0	0	0	0	0	0	0	0	0	0	0	0	0	0	0	0	0
72	2000-01-01	1899-12-31 12:00:00	42	0	0	0	0	0	0	0	0	0	0	0	0	0	0	0	0	0	0	0	0	0	0	0	0	0	0	0	0	0	0	0	0	0	0	0	0	0	0	0	0	0	0	0	0	0	0
73	2000-01-01	1899-12-31 12:00:00	42	0	0	0	0	0	0	0	0	0	0	0	0	0	0	0	0	0	0	0	0	0	0	0	0	0	0	0	0	0	0	0	0	0	0	0	0	0	0	0	0	0	0	0	0	0	0
74	2000-01-01	1899-12-31 12:00:00	42	0	0	0	0	0	0	0	0	0	0	0	0	0	0	0	0	0	0	0	0	0	0	0	0	0	0	0	0	0	0	0	0	0	0	0	0	0	0	0	0	0	0	0	0	0	0
75	2000-01-01	1899-12-31 12:00:00	42	0	0	0	0	0	0	0	0	0	0	0	0	0	0	0	0	0	0	0	0	0	0	0	0	0	0	0	0	0	0	0	0	0	0	0	0	0	0	0	0	0	0	0	0	0	0
				0	0	0	0	0	0	0	0	0	0	0	0	0	0	0	0	0	0	0	0	0	0	0	0	0	0	0	0	0	0	0	0	0	0	0	0	0	0	0	0	0	0	0	0	0	0
[truncated: 154 more columns]

## Sheet: Nx per bottle
			deaths
				bottle number
	date	time	day	1	2	3	4	5	6	7	8	9	10	11	12	13	14	15	16	17	18	19	20	21	22	23	24	25	26	27	28	29	30	31	32	33	34	35	36	37	38	39	40	41	42	43	44	45	46
0	2017-11-21	1899-12-31 12:00:00	0	15	15	15	15	15	15	15	15	15	15	15	15	15	15	15	15	15	15	15	15	15	15	15	15	15	15	15	15	15	15	15	15	15	15	15	15	15	15	15	15	15	15	15	15	15	15
1	2017-11-24	1899-12-31 12:00:00	3	15	15	15	15	15	15	15	15	15	15	15	15	15	15	15	15	15	15	15	15	15	15	15	15	15	15	15	15	15	15	15	15	15	15	15	15	15	15	15	15	15	15	15	15	15	15
2	2017-11-27	1899-12-31 12:00:00	6	14	14	15	15	14	15	15	15	15	15	15	15	15	15	15	15	15	15	15	15	15	15	15	15	15	15	15	15	15	15	15	15	15	15	15	15	15	15	15	15	13	12	13	13	13	15
3	2017-11-29	1899-12-31 12:00:00	8	14	13	14	13	14	14	15	15	15	15	15	15	15	15	15	15	15	15	15	15	15	15	15	15	15	15	15	15	15	15	15	15	15	15	15	15	15	15	15	15	12	9	11	13	12	15
4	2017-12-01	1899-12-31 12:00:00	10	11	11	8	12	11	8	10	15	15	15	15	15	15	15	15	15	15	15	15	15	15	15	15	15	15	15	15	15	15	15	15	15	15	15	15	15	15	15	15	15	7	3	4	5	4	15
5	2017-12-04	1899-12-31 12:00:00	13	7	6	4	3	2	4	7	15	15	15	15	15	15	15	15	15	15	15	15	15	15	15	15	15	15	15	15	15	15	15	15	15	15	15	15	15	15	15	15	15	-1	0	0	0	0	15
6	2017-12-06	1899-12-31 12:00:00	15	4	4	3	2	1	1	5	15	15	15	15	15	15	15	15	15	15	15	15	15	15	15	15	15	15	15	15	15	15	15	15	15	15	15	15	15	15	15	15	15	-1	0	0	-1	0	15
7	2017-12-08	1899-12-31 12:00:00	17	3	4	3	1	0	1	3	15	15	15	15	15	15	15	15	15	15	15	15	15	15	15	15	15	15	15	15	15	15	15	15	15	15	15	15	15	15	15	15	15	-1	-2	0	-1	0	15
8	2017-12-11	1899-12-31 12:00:00	20	2	3	2	1	-1	1	3	15	15	15	15	15	15	15	15	15	15	15	15	15	15	15	15	15	15	15	15	15	15	15	15	15	15	15	15	15	15	15	15	15	-1	-3	0	-1	0	15
9	2017-12-13	1899-12-31 12:00:00	22	2	0	2	1	-1	1	2	15	15	15	15	15	15	15	15	15	15	15	15	15	15	15	15	15	15	15	15	15	15	15	15	15	15	15	15	15	15	15	15	15	-1	-3	0	-1	0	15
10	2017-12-15	1899-12-31 12:00:00	24	2	0	1	1	-1	-1	2	15	15	15	15	15	15	15	15	15	15	15	15	15	15	15	15	15	15	15	15	15	15	15	15	15	15	15	15	15	15	15	15	15	-1	-3	0	-1	0	15
11	2017-12-18	1899-12-31 12:00:00	27	2	0	1	1	-1	-1	2	15	15	15	15	15	15	15	15	15	15	15	15	15	15	15	15	15	15	15	15	15	15	15	15	15	15	15	15	15	15	15	15	15	-1	-3	0	-1	0	15
12	2017-12-20	1899-12-31 12:00:00	29	2	0	1	1	-1	-1	2	15	15	15	15	15	15	15	15	15	15	15	15	15	15	15	15	15	15	15	14	15	15	15	15	15	15	15	15	15	15	15	15	15	-1	-3	0	-1	0	15
13	2017-12-22	1899-12-31 12:00:00	31	1	0	0	1	-1	-1	2	15	15	15	15	15	15	15	15	15	15	15	15	15	15	15	15	15	15	15	14	15	15	15	15	15	15	15	15	15	15	15	15	15	-1	-3	0	-1	0	15
14	2017-12-24	1899-12-31 12:00:00	33	1	-2	0	1	-1	-1	1	15	15	15	15	15	15	15	15	15	15	15	15	15	15	15	15	15	15	15	14	15	15	15	15	15	15	15	15	15	15	15	15	15	-1	-3	0	-1	0	15
15	2017-12-27	1899-12-31 12:00:00	36	1	-2	-1	1	-1	-2	1	15	15	15	15	15	15	15	15	15	15	15	15	15	15	15	15	15	15	15	14	15	15	15	15	15	15	15	15	15	15	15	15	15	-1	-3	0	-1	0	15
16	2017-12-30	1899-12-31 12:00:00	39	1	-2	-1	1	-1	-2	1	15	15	15	15	15	15	15	15	15	15	15	15	15	15	14	15	15	15	15	14	15	15	15	15	15	15	15	15	15	15	15	15	15	-1	-3	0	-1	0	15
17	2018-01-02	1899-12-31 12:00:00	42	1	-2	-1	0	-1	-2	1	15	15	15	15	15	15	15	15	15	15	15	15	15	15	14	15	15	15	15	14	15	15	15	15	15	15	15	15	15	15	15	15	15	-1	-3	0	-1	0	15
18	2000-01-01	1899-12-31 12:00:00	42	1	-2	-1	0	-1	-2	1	15	15	15	15	15	15	15	15	15	15	15	15	15	15	14	15	15	15	15	14	15	15	15	15	15	15	15	15	15	15	15	15	15	-1	-3	0	-1	0	15
19	2000-01-01	1899-12-31 12:00:00	42	1	-2	-1	0	-1	-2	1	15	15	15	15	15	15	15	15	15	15	15	15	15	15	14	15	15	15	15	14	15	15	15	15	15	15	15	15	15	15	15	15	15	-1	-3	0	-1	0	15
20	2000-01-01	1899-12-31 12:00:00	42	1	-2	-1	0	-1	-2	1	15	15	15	15	15	15	15	15	15	15	15	15	15	15	14	15	15	15	15	14	15	15	15	15	15	15	15	15	15	15	15	15	15	-1	-3	0	-1	0	15
21	2000-01-01	1899-12-31 12:00:00	42	1	-2	-1	0	-1	-2	1	15	15	15	15	15	15	15	15	15	15	15	15	15	15	14	15	15	15	15	14	15	15	15	15	15	15	15	15	15	15	15	15	15	-1	-3	0	-1	0	15
22	2000-01-01	1899-12-31 12:00:00	42	1	-2	-1	0	-1	-2	1	15	15	15	15	15	15	15	15	15	15	15	15	15	15	14	15	15	15	15	14	15	15	15	15	15	15	15	15	15	15	15	15	15	-1	-3	0	-1	0	15
23	2000-01-01	1899-12-31 12:00:00	42	1	-2	-1	0	-1	-2	1	15	15	15	15	15	15	15	15	15	15	15	15	15	15	14	15	15	15	15	14	15	15	15	15	15	15	15	15	15	15	15	15	15	-1	-3	0	-1	0	15
24	2000-01-01	1899-12-31 12:00:00	42	1	-2	-1	0	-1	-2	1	15	15	15	15	15	15	15	15	15	15	15	15	15	15	14	15	15	15	15	14	15	15	15	15	15	15	15	15	15	15	15	15	15	-1	-3	0	-1	0	15
25	2000-01-01	1899-12-31 12:00:00	42	1	-2	-1	0	-1	-2	1	15	15	15	15	15	15	15	15	15	15	15	15	15	15	14	15	15	15	15	14	15	15	15	15	15	15	15	15	15	15	15	15	15	-1	-3	0	-1	0	15
26	2000-01-01	1899-12-31 12:00:00	42	1	-2	-1	0	-1	-2	1	15	15	15	15	15	15	15	15	15	15	15	15	15	15	14	15	15	15	15	14	15	15	15	15	15	15	15	15	15	15	15	15	15	-1	-3	0	-1	0	15
27	2000-01-01	1899-12-31 12:00:00	42	1	-2	-1	0	-1	-2	1	15	15	15	15	15	15	15	15	15	15	15	15	15	15	14	15	15	15	15	14	15	15	15	15	15	15	15	15	15	15	15	15	15	-1	-3	0	-1	0	15
28	2000-01-01	1899-12-31 12:00:00	42	1	-2	-1	0	-1	-2	1	15	15	15	15	15	15	15	15	15	15	15	15	15	15	14	15	15	15	15	14	15	15	15	15	15	15	15	15	15	15	15	15	15	-1	-3	0	-1	0	15
29	2000-01-01	1899-12-31 12:00:00	42	1	-2	-1	0	-1	-2	1	15	15	15	15	15	15	15	15	15	15	15	15	15	15	14	15	15	15	15	14	15	15	15	15	15	15	15	15	15	15	15	15	15	-1	-3	0	-1	0	15
30	2000-01-01	1899-12-31 12:00:00	42	1	-2	-1	0	-1	-2	1	15	15	15	15	15	15	15	15	15	15	15	15	15	15	14	15	15	15	15	14	15	15	15	15	15	15	15	15	15	15	15	15	15	-1	-3	0	-1	0	15
31	2000-01-01	1899-12-31 12:00:00	42	1	-2	-1	0	-1	-2	1	15	15	15	15	15	15	15	15	15	15	15	15	15	15	14	15	15	15	15	14	15	15	15	15	15	15	15	15	15	15	15	15	15	-1	-3	0	-1	0	15
32	2000-01-01	1899-12-31 12:00:00	42	1	-2	-1	0	-1	-2	1	15	15	15	15	15	15	15	15	15	15	15	15	15	15	14	15	15	15	15	14	15	15	15	15	15	15	15	15	15	15	15	15	15	-1	-3	0	-1	0	15
33	2000-01-01	1899-12-31 12:00:00	42	1	-2	-1	0	-1	-2	1	15	15	15	15	15	15	15	15	15	15	15	15	15	15	14	15	15	15	15	14	15	15	15	15	15	15	15	15	15	15	15	15	15	-1	-3	0	-1	0	15
34	2000-01-01	1899-12-31 12:00:00	42	1	-2	-1	0	-1	-2	1	15	15	15	15	15	15	15	15	15	15	15	15	15	15	14	15	15	15	15	14	15	15	15	15	15	15	15	15	15	15	15	15	15	-1	-3	0	-1	0	15
35	2000-01-01	1899-12-31 12:00:00	42	1	-2	-1	0	-1	-2	1	15	15	15	15	15	15	15	15	15	15	15	15	15	15	14	15	15	15	15	14	15	15	15	15	15	15	15	15	15	15	15	15	15	-1	-3	0	-1	0	15
36	2000-01-01	1899-12-31 12:00:00	42	1	-2	-1	0	-1	-2	1	15	15	15	15	15	15	15	15	15	15	15	15	15	15	14	15	15	15	15	14	15	15	15	15	15	15	15	15	15	15	15	15	15	-1	-3	0	-1	0	15
37	2000-01-01	1899-12-31 12:00:00	42	1	-2	-1	0	-1	-2	1	15	15	15	15	15	15	15	15	15	15	15	15	15	15	14	15	15	15	15	14	15	15	15	15	15	15	15	15	15	15	15	15	15	-1	-3	0	-1	0	15
38	2000-01-01	1899-12-31 12:00:00	42	1	-2	-1	0	-1	-2	1	15	15	15	15	15	15	15	15	15	15	15	15	15	15	14	15	15	15	15	14	15	15	15	15	15	15	15	15	15	15	15	15	15	-1	-3	0	-1	0	15
39	2000-01-01	1899-12-31 12:00:00	42	1	-2	-1	0	-1	-2	1	15	15	15	15	15	15	15	15	15	15	15	15	15	15	14	15	15	15	15	14	15	15	15	15	15	15	15	15	15	15	15	15	15	-1	-3	0	-1	0	15
40	2000-01-01	1899-12-31 12:00:00	42	1	-2	-1	0	-1	-2	1	15	15	15	15	15	15	15	15	15	15	15	15	15	15	14	15	15	15	15	14	15	15	15	15	15	15	15	15	15	15	15	15	15	-1	-3	0	-1	0	15
41	2000-01-01	1899-12-31 12:00:00	42	1	-2	-1	0	-1	-2	1	15	15	15	15	15	15	15	15	15	15	15	15	15	15	14	15	15	15	15	14	15	15	15	15	15	15	15	15	15	15	15	15	15	-1	-3	0	-1	0	15
42	2000-01-01	1899-12-31 12:00:00	42	1	-2	-1	0	-1	-2	1	15	15	15	15	15	15	15	15	15	15	15	15	15	15	14	15	15	15	15	14	15	15	15	15	15	15	15	15	15	15	15	15	15	-1	-3	0	-1	0	15
43	2000-01-01	1899-12-31 12:00:00	42	1	-2	-1	0	-1	-2	1	15	15	15	15	15	15	15	15	15	15	15	15	15	15	14	15	15	15	15	14	15	15	15	15	15	15	15	15	15	15	15	15	15	-1	-3	0	-1	0	15
44	2000-01-01	1899-12-31 12:00:00	42	1	-2	-1	0	-1	-2	1	15	15	15	15	15	15	15	15	15	15	15	15	15	15	14	15	15	15	15	14	15	15	15	15	15	15	15	15	15	15	15	15	15	-1	-3	0	-1	0	15
45	2000-01-01	1899-12-31 12:00:00	42	1	-2	-1	0	-1	-2	1	15	15	15	15	15	15	15	15	15	15	15	15	15	15	14	15	15	15	15	14	15	15	15	15	15	15	15	15	15	15	15	15	15	-1	-3	0	-1	0	15
46	2000-01-01	1899-12-31 12:00:00	42	1	-2	-1	0	-1	-2	1	15	15	15	15	15	15	15	15	15	15	15	15	15	15	14	15	15	15	15	14	15	15	15	15	15	15	15	15	15	15	15	15	15	-1	-3	0	-1	0	15
47	2000-01-01	1899-12-31 12:00:00	42	1	-2	-1	0	-1	-2	1	15	15	15	15	15	15	15	15	15	15	15	15	15	15	14	15	15	15	15	14	15	15	15	15	15	15	15	15	15	15	15	15	15	-1	-3	0	-1	0	15
48	2000-01-01	1899-12-31 12:00:00	42	1	-2	-1	0	-1	-2	1	15	15	15	15	15	15	15	15	15	15	15	15	15	15	14	15	15	15	15	14	15	15	15	15	15	15	15	15	15	15	15	15	15	-1	-3	0	-1	0	15
49	2000-01-01	1899-12-31 12:00:00	42	1	-2	-1	0	-1	-2	1	15	15	15	15	15	15	15	15	15	15	15	15	15	15	14	15	15	15	15	14	15	15	15	15	15	15	15	15	15	15	15	15	15	-1	-3	0	-1	0	15
50	2000-01-01	1899-12-31 12:00:00	42	1	-2	-1	0	-1	-2	1	15	15	15	15	15	15	15	15	15	15	15	15	15	15	14	15	15	15	15	14	15	15	15	15	15	15	15	15	15	15	15	15	15	-1	-3	0	-1	0	15
51	2000-01-01	1899-12-31 12:00:00	42	1	-2	-1	0	-1	-2	1	15	15	15	15	15	15	15	15	15	15	15	15	15	15	14	15	15	15	15	14	15	15	15	15	15	15	15	15	15	15	15	15	15	-1	-3	0	-1	0	15
52	2000-01-01	1899-12-31 12:00:00	42	1	-2	-1	0	-1	-2	1	15	15	15	15	15	15	15	15	15	15	15	15	15	15	14	15	15	15	15	14	15	15	15	15	15	15	15	15	15	15	15	15	15	-1	-3	0	-1	0	15
53	2000-01-01	1899-12-31 12:00:00	42	1	-2	-1	0	-1	-2	1	15	15	15	15	15	15	15	15	15	15	15	15	15	15	14	15	15	15	15	14	15	15	15	15	15	15	15	15	15	15	15	15	15	-1	-3	0	-1	0	15
54	2000-01-01	1899-12-31 12:00:00	42	1	-2	-1	0	-1	-2	1	15	15	15	15	15	15	15	15	15	15	15	15	15	15	14	15	15	15	15	14	15	15	15	15	15	15	15	15	15	15	15	15	15	-1	-3	0	-1	0	15
55	2000-01-01	1899-12-31 12:00:00	42	1	-2	-1	0	-1	-2	1	15	15	15	15	15	15	15	15	15	15	15	15	15	15	14	15	15	15	15	14	15	15	15	15	15	15	15	15	15	15	15	15	15	-1	-3	0	-1	0	15
56	2000-01-01	1899-12-31 12:00:00	42	1	-2	-1	0	-1	-2	1	15	15	15	15	15	15	15	15	15	15	15	15	15	15	14	15	15	15	15	14	15	15	15	15	15	15	15	15	15	15	15	15	15	-1	-3	0	-1	0	15
57	2000-01-01	1899-12-31 12:00:00	42	1	-2	-1	0	-1	-2	1	15	15	15	15	15	15	15	15	15	15	15	15	15	15	14	15	15	15	15	14	15	15	15	15	15	15	15	15	15	15	15	15	15	-1	-3	0	-1	0	15
58	2000-01-01	1899-12-31 12:00:00	42	1	-2	-1	0	-1	-2	1	15	15	15	15	15	15	15	15	15	15	15	15	15	15	14	15	15	15	15	14	15	15	15	15	15	15	15	15	15	15	15	15	15	-1	-3	0	-1	0	15
59	2000-01-01	1899-12-31 12:00:00	42	1	-2	-1	0	-1	-2	1	15	15	15	15	15	15	15	15	15	15	15	15	15	15	14	15	15	15	15	14	15	15	15	15	15	15	15	15	15	15	15	15	15	-1	-3	0	-1	0	15
60	2000-01-01	1899-12-31 12:00:00	42	1	-2	-1	0	-1	-2	1	15	15	15	15	15	15	15	15	15	15	15	15	15	15	14	15	15	15	15	14	15	15	15	15	15	15	15	15	15	15	15	15	15	-1	-3	0	-1	0	15
61	2000-01-01	1899-12-31 12:00:00	42	1	-2	-1	0	-1	-2	1	15	15	15	15	15	15	15	15	15	15	15	15	15	15	14	15	15	15	15	14	15	15	15	15	15	15	15	15	15	15	15	15	15	-1	-3	0	-1	0	15
62	2000-01-01	1899-12-31 12:00:00	42	1	-2	-1	0	-1	-2	1	15	15	15	15	15	15	15	15	15	15	15	15	15	15	14	15	15	15	15	14	15	15	15	15	15	15	15	15	15	15	15	15	15	-1	-3	0	-1	0	15
63	2000-01-01	1899-12-31 12:00:00	42	1	-2	-1	0	-1	-2	1	15	15	15	15	15	15	15	15	15	15	15	15	15	15	14	15	15	15	15	14	15	15	15	15	15	15	15	15	15	15	15	15	15	-1	-3	0	-1	0	15
64	2000-01-01	1899-12-31 12:00:00	42	1	-2	-1	0	-1	-2	1	15	15	15	15	15	15	15	15	15	15	15	15	15	15	14	15	15	15	15	14	15	15	15	15	15	15	15	15	15	15	15	15	15	-1	-3	0	-1	0	15
65	2000-01-01	1899-12-31 12:00:00	42	1	-2	-1	0	-1	-2	1	15	15	15	15	15	15	15	15	15	15	15	15	15	15	14	15	15	15	15	14	15	15	15	15	15	15	15	15	15	15	15	15	15	-1	-3	0	-1	0	15
66	2000-01-01	1899-12-31 12:00:00	42	1	-2	-1	0	-1	-2	1	15	15	15	15	15	15	15	15	15	15	15	15	15	15	14	15	15	15	15	14	15	15	15	15	15	15	15	15	15	15	15	15	15	-1	-3	0	-1	0	15
67	2000-01-01	1899-12-31 12:00:00	42	1	-2	-1	0	-1	-2	1	15	15	15	15	15	15	15	15	15	15	15	15	15	15	14	15	15	15	15	14	15	15	15	15	15	15	15	15	15	15	15	15	15	-1	-3	0	-1	0	15
68	2000-01-01	1899-12-31 12:00:00	42	1	-2	-1	0	-1	-2	1	15	15	15	15	15	15	15	15	15	15	15	15	15	15	14	15	15	15	15	14	15	15	15	15	15	15	15	15	15	15	15	15	15	-1	-3	0	-1	0	15
69	2000-01-01	1899-12-31 12:00:00	42	1	-2	-1	0	-1	-2	1	15	15	15	15	15	15	15	15	15	15	15	15	15	15	14	15	15	15	15	14	15	15	15	15	15	15	15	15	15	15	15	15	15	-1	-3	0	-1	0	15
70	2000-01-01	1899-12-31 12:00:00	42	1	-2	-1	0	-1	-2	1	15	15	15	15	15	15	15	15	15	15	15	15	15	15	14	15	15	15	15	14	15	15	15	15	15	15	15	15	15	15	15	15	15	-1	-3	0	-1	0	15
71	2000-01-01	1899-12-31 12:00:00	42	1	-2	-1	0	-1	-2	1	15	15	15	15	15	15	15	15	15	15	15	15	15	15	14	15	15	15	15	14	15	15	15	15	15	15	15	15	15	15	15	15	15	-1	-3	0	-1	0	15
72	2000-01-01	1899-12-31 12:00:00	42	1	-2	-1	0	-1	-2	1	15	15	15	15	15	15	15	15	15	15	15	15	15	15	14	15	15	15	15	14	15	15	15	15	15	15	15	15	15	15	15	15	15	-1	-3	0	-1	0	15
73	2000-01-01	1899-12-31 12:00:00	42	1	-2	-1	0	-1	-2	1	15	15	15	15	15	15	15	15	15	15	15	15	15	15	14	15	15	15	15	14	15	15	15	15	15	15	15	15	15	15	15	15	15	-1	-3	0	-1	0	15
74	2000-01-01	1899-12-31 12:00:00	42	1	-2	-1	0	-1	-2	1	15	15	15	15	15	15	15	15	15	15	15	15	15	15	14	15	15	15	15	14	15	15	15	15	15	15	15	15	15	15	15	15	15	-1	-3	0	-1	0	15
75	2000-01-01	1899-12-31 12:00:00	42	1	-2	-1	0	-1	-2	1	15	15	15	15	15	15	15	15	15	15	15	15	15	15	14	15	15	15	15	14	15	15	15	15	15	15	15	15	15	15	15	15	15	-1	-3	0	-1	0	15
				1	-2	-1	0	-1	-2	1	15	15	15	15	15	15	15	15	15	15	15	15	15	15	14	15	15	15	15	14	15	15	15	15	15	15	15	15	15	15	15	15	15	-1	-3	0	-1	0	15
[truncated: 154 more columns]

## Sheet: Px per bottle
			deaths
				15	15	15	15	15	15	15	15	15	15	15	15	15	15	15	15	15	15	15	15	15	15	15	15	15	15	15	15	15	15	15	15	15	15	15	15	15	15	15	15	15	15	15	15	15	15
0				14	17	16	15	16	17	14	0	0	0	0	0	0	0	0	0	0	0	0	0	0	1	0	0	0	0	1	0	0	0	0	0	0	0	0	0	0	0	0	0	16	18	15	16	15	0
	date	time	day	1	2	3	4	5	6	7	8	9	10	11	12	13	14	15	16	17	18	19	20	21	22	23	24	25	26	27	28	29	30	31	32	33	34	35	36	37	38	39	40	41	42	43	44	45	46
1	2017-11-24	1899-12-31 12:00:00	3	1	1	1	1	1	1	1	1	1	1	1	1	1	1	1	1	1	1	1	1	1	1	1	1	1	1	1	1	1	1	1	1	1	1	1	1	1	1	1	1	1	1	1	1	1	1
2	2017-11-27	1899-12-31 12:00:00	6	0.933333	0.933333	1	1	0.933333	1	1	1	1	1	1	1	1	1	1	1	1	1	1	1	1	1	1	1	1	1	1	1	1	1	1	1	1	1	1	1	1	1	1	1	0.866667	0.8	0.866667	0.866667	0.866667	1
3	2017-11-29	1899-12-31 12:00:00	8	0.933333	0.866667	0.933333	0.866667	0.933333	0.933333	1	1	1	1	1	1	1	1	1	1	1	1	1	1	1	1	1	1	1	1	1	1	1	1	1	1	1	1	1	1	1	1	1	1	0.8	0.6	0.733333	0.866667	0.8	1
4	2017-12-01	1899-12-31 12:00:00	10	0.733333	0.733333	0.533333	0.8	0.733333	0.533333	0.666667	1	1	1	1	1	1	1	1	1	1	1	1	1	1	1	1	1	1	1	1	1	1	1	1	1	1	1	1	1	1	1	1	1	0.466667	0.2	0.266667	0.333333	0.266667	1
5	2017-12-04	1899-12-31 12:00:00	13	0.466667	0.4	0.266667	0.2	0.133333	0.266667	0.466667	1	1	1	1	1	1	1	1	1	1	1	1	1	1	1	1	1	1	1	1	1	1	1	1	1	1	1	1	1	1	1	1	1	-0.0666667	0	0	0	0	1
6	2017-12-06	1899-12-31 12:00:00	15	0.266667	0.266667	0.2	0.133333	0.0666667	0.0666667	0.333333	1	1	1	1	1	1	1	1	1	1	1	1	1	1	1	1	1	1	1	1	1	1	1	1	1	1	1	1	1	1	1	1	1	-0.0666667	#DIV/0!	#DIV/0!	#DIV/0!	#DIV/0!	1
7	2017-12-08	1899-12-31 12:00:00	17	0.2	0.266667	0.2	0.0666667	0	0.0666667	0.2	1	1	1	1	1	1	1	1	1	1	1	1	1	1	1	1	1	1	1	1	1	1	1	1	1	1	1	1	1	1	1	1	1	-0.0666667	#DIV/0!	#DIV/0!	#DIV/0!	#DIV/0!	1
8	2017-12-11	1899-12-31 12:00:00	20	0.133333	0.2	0.133333	0.0666667	#DIV/0!	0.0666667	0.2	1	1	1	1	1	1	1	1	1	1	1	1	1	1	1	1	1	1	1	1	1	1	1	1	1	1	1	1	1	1	1	1	1	-0.0666667	#DIV/0!	#DIV/0!	#DIV/0!	#DIV/0!	1
9	2017-12-13	1899-12-31 12:00:00	22	0.133333	0	0.133333	0.0666667	#DIV/0!	0.0666667	0.133333	1	1	1	1	1	1	1	1	1	1	1	1	1	1	1	1	1	1	1	1	1	1	1	1	1	1	1	1	1	1	1	1	1	-0.0666667	#DIV/0!	#DIV/0!	#DIV/0!	#DIV/0!	1
10	2017-12-15	1899-12-31 12:00:00	24	0.133333	#DIV/0!	0.0666667	0.0666667	#DIV/0!	-0.0666667	0.133333	1	1	1	1	1	1	1	1	1	1	1	1	1	1	1	1	1	1	1	1	1	1	1	1	1	1	1	1	1	1	1	1	1	-0.0666667	#DIV/0!	#DIV/0!	#DIV/0!	#DIV/0!	1
11	2017-12-18	1899-12-31 12:00:00	27	0.133333	#DIV/0!	0.0666667	0.0666667	#DIV/0!	-0.0666667	0.133333	1	1	1	1	1	1	1	1	1	1	1	1	1	1	1	1	1	1	1	1	1	1	1	1	1	1	1	1	1	1	1	1	1	-0.0666667	#DIV/0!	#DIV/0!	#DIV/0!	#DIV/0!	1
12	2017-12-20	1899-12-31 12:00:00	29	0.133333	#DIV/0!	0.0666667	0.0666667	#DIV/0!	-0.0666667	0.133333	1	1	1	1	1	1	1	1	1	1	1	1	1	1	1	1	1	1	1	0.933333	1	1	1	1	1	1	1	1	1	1	1	1	1	-0.0666667	#DIV/0!	#DIV/0!	#DIV/0!	#DIV/0!	1
13	2017-12-22	1899-12-31 12:00:00	31	0.0666667	#DIV/0!	0	0.0666667	#DIV/0!	-0.0666667	0.133333	1	1	1	1	1	1	1	1	1	1	1	1	1	1	1	1	1	1	1	0.933333	1	1	1	1	1	1	1	1	1	1	1	1	1	-0.0666667	#DIV/0!	#DIV/0!	#DIV/0!	#DIV/0!	1
14	2017-12-24	1899-12-31 12:00:00	33	0.0666667	#DIV/0!	#DIV/0!	0.0666667	#DIV/0!	-0.0666667	0.0666667	1	1	1	1	1	1	1	1	1	1	1	1	1	1	1	1	1	1	1	0.933333	1	1	1	1	1	1	1	1	1	1	1	1	1	-0.0666667	#DIV/0!	#DIV/0!	#DIV/0!	#DIV/0!	1
15	2017-12-27	1899-12-31 12:00:00	36	0.0666667	#DIV/0!	#DIV/0!	0.0666667	#DIV/0!	-0.133333	0.0666667	1	1	1	1	1	1	1	1	1	1	1	1	1	1	1	1	1	1	1	0.933333	1	1	1	1	1	1	1	1	1	1	1	1	1	-0.0666667	#DIV/0!	#DIV/0!	#DIV/0!	#DIV/0!	1
16	2017-12-30	1899-12-31 12:00:00	39	0.0666667	#DIV/0!	#DIV/0!	0.0666667	#DIV/0!	-0.133333	0.0666667	1	1	1	1	1	1	1	1	1	1	1	1	1	1	0.933333	1	1	1	1	0.933333	1	1	1	1	1	1	1	1	1	1	1	1	1	-0.0666667	#DIV/0!	#DIV/0!	#DIV/0!	#DIV/0!	1
17	2018-01-02	1899-12-31 12:00:00	42	0.0666667	#DIV/0!	#DIV/0!	0	#DIV/0!	-0.133333	0.0666667	1	1	1	1	1	1	1	1	1	1	1	1	1	1	0.933333	1	1	1	1	0.933333	1	1	1	1	1	1	1	1	1	1	1	1	1	-0.0666667	#DIV/0!	#DIV/0!	#DIV/0!	#DIV/0!	1
18	2000-01-01	1899-12-31 12:00:00	42	0.0666667	#DIV/0!	#DIV/0!	#DIV/0!	#DIV/0!	-0.133333	0.0666667	1	1	1	1	1	1	1	1	1	1	1	1	1	1	0.933333	1	1	1	1	0.933333	1	1	1	1	1	1	1	1	1	1	1	1	1	-0.0666667	#DIV/0!	#DIV/0!	#DIV/0!	#DIV/0!	1
19	2000-01-01	1899-12-31 12:00:00	42	0.0666667	#DIV/0!	#DIV/0!	#DIV/0!	#DIV/0!	-0.133333	0.0666667	1	1	1	1	1	1	1	1	1	1	1	1	1	1	0.933333	1	1	1	1	0.933333	1	1	1	1	1	1	1	1	1	1	1	1	1	-0.0666667	#DIV/0!	#DIV/0!	#DIV/0!	#DIV/0!	1
20	2000-01-01	1899-12-31 12:00:00	42	0.0666667	#DIV/0!	#DIV/0!	#DIV/0!	#DIV/0!	-0.133333	0.0666667	1	1	1	1	1	1	1	1	1	1	1	1	1	1	0.933333	1	1	1	1	0.933333	1	1	1	1	1	1	1	1	1	1	1	1	1	-0.0666667	#DIV/0!	#DIV/0!	#DIV/0!	#DIV/0!	1
21	2000-01-01	1899-12-31 12:00:00	42	0.0666667	#DIV/0!	#DIV/0!	#DIV/0!	#DIV/0!	-0.133333	0.0666667	1	1	1	1	1	1	1	1	1	1	1	1	1	1	0.933333	1	1	1	1	0.933333	1	1	1	1	1	1	1	1	1	1	1	1	1	-0.0666667	#DIV/0!	#DIV/0!	#DIV/0!	#DIV/0!	1
22	2000-01-01	1899-12-31 12:00:00	42	0.0666667	#DIV/0!	#DIV/0!	#DIV/0!	#DIV/0!	-0.133333	0.0666667	1	1	1	1	1	1	1	1	1	1	1	1	1	1	0.933333	1	1	1	1	0.933333	1	1	1	1	1	1	1	1	1	1	1	1	1	-0.0666667	#DIV/0!	#DIV/0!	#DIV/0!	#DIV/0!	1
23	2000-01-01	1899-12-31 12:00:00	42	0.0666667	#DIV/0!	#DIV/0!	#DIV/0!	#DIV/0!	-0.133333	0.0666667	1	1	1	1	1	1	1	1	1	1	1	1	1	1	0.933333	1	1	1	1	0.933333	1	1	1	1	1	1	1	1	1	1	1	1	1	-0.0666667	#DIV/0!	#DIV/0!	#DIV/0!	#DIV/0!	1
24	2000-01-01	1899-12-31 12:00:00	42	0.0666667	#DIV/0!	#DIV/0!	#DIV/0!	#DIV/0!	-0.133333	0.0666667	1	1	1	1	1	1	1	1	1	1	1	1	1	1	0.933333	1	1	1	1	0.933333	1	1	1	1	1	1	1	1	1	1	1	1	1	-0.0666667	#DIV/0!	#DIV/0!	#DIV/0!	#DIV/0!	1
25	2000-01-01	1899-12-31 12:00:00	42	0.0666667	#DIV/0!	#DIV/0!	#DIV/0!	#DIV/0!	-0.133333	0.0666667	1	1	1	1	1	1	1	1	1	1	1	1	1	1	0.933333	1	1	1	1	0.933333	1	1	1	1	1	1	1	1	1	1	1	1	1	-0.0666667	#DIV/0!	#DIV/0!	#DIV/0!	#DIV/0!	1
26	2000-01-01	1899-12-31 12:00:00	42	0.0666667	#DIV/0!	#DIV/0!	#DIV/0!	#DIV/0!	-0.133333	0.0666667	1	1	1	1	1	1	1	1	1	1	1	1	1	1	0.933333	1	1	1	1	0.933333	1	1	1	1	1	1	1	1	1	1	1	1	1	-0.0666667	#DIV/0!	#DIV/0!	#DIV/0!	#DIV/0!	1
27	2000-01-01	1899-12-31 12:00:00	42	0.0666667	#DIV/0!	#DIV/0!	#DIV/0!	#DIV/0!	-0.133333	0.0666667	1	1	1	1	1	1	1	1	1	1	1	1	1	1	0.933333	1	1	1	1	0.933333	1	1	1	1	1	1	1	1	1	1	1	1	1	-0.0666667	#DIV/0!	#DIV/0!	#DIV/0!	#DIV/0!	1
28	2000-01-01	1899-12-31 12:00:00	42	0.0666667	#DIV/0!	#DIV/0!	#DIV/0!	#DIV/0!	-0.133333	0.0666667	1	1	1	1	1	1	1	1	1	1	1	1	1	1	0.933333	1	1	1	1	0.933333	1	1	1	1	1	1	1	1	1	1	1	1	1	-0.0666667	#DIV/0!	#DIV/0!	#DIV/0!	#DIV/0!	1
29	2000-01-01	1899-12-31 12:00:00	42	0.0666667	#DIV/0!	#DIV/0!	#DIV/0!	#DIV/0!	-0.133333	0.0666667	1	1	1	1	1	1	1	1	1	1	1	1	1	1	0.933333	1	1	1	1	0.933333	1	1	1	1	1	1	1	1	1	1	1	1	1	-0.0666667	#DIV/0!	#DIV/0!	#DIV/0!	#DIV/0!	1
30	2000-01-01	1899-12-31 12:00:00	42	0.0666667	#DIV/0!	#DIV/0!	#DIV/0!	#DIV/0!	-0.133333	0.0666667	1	1	1	1	1	1	1	1	1	1	1	1	1	1	0.933333	1	1	1	1	0.933333	1	1	1	1	1	1	1	1	1	1	1	1	1	-0.0666667	#DIV/0!	#DIV/0!	#DIV/0!	#DIV/0!	1
31	2000-01-01	1899-12-31 12:00:00	42	0.0666667	#DIV/0!	#DIV/0!	#DIV/0!	#DIV/0!	-0.133333	0.0666667	1	1	1	1	1	1	1	1	1	1	1	1	1	1	0.933333	1	1	1	1	0.933333	1	1	1	1	1	1	1	1	1	1	1	1	1	-0.0666667	#DIV/0!	#DIV/0!	#DIV/0!	#DIV/0!	1
32	2000-01-01	1899-12-31 12:00:00	42	0.0666667	#DIV/0!	#DIV/0!	#DIV/0!	#DIV/0!	-0.133333	0.0666667	1	1	1	1	1	1	1	1	1	1	1	1	1	1	0.933333	1	1	1	1	0.933333	1	1	1	1	1	1	1	1	1	1	1	1	1	-0.0666667	#DIV/0!	#DIV/0!	#DIV/0!	#DIV/0!	1
33	2000-01-01	1899-12-31 12:00:00	42	0.0666667	#DIV/0!	#DIV/0!	#DIV/0!	#DIV/0!	-0.133333	0.0666667	1	1	1	1	1	1	1	1	1	1	1	1	1	1	0.933333	1	1	1	1	0.933333	1	1	1	1	1	1	1	1	1	1	1	1	1	-0.0666667	#DIV/0!	#DIV/0!	#DIV/0!	#DIV/0!	1
34	2000-01-01	1899-12-31 12:00:00	42	0.0666667	#DIV/0!	#DIV/0!	#DIV/0!	#DIV/0!	-0.133333	0.0666667	1	1	1	1	1	1	1	1	1	1	1	1	1	1	0.933333	1	1	1	1	0.933333	1	1	1	1	1	1	1	1	1	1	1	1	1	-0.0666667	#DIV/0!	#DIV/0!	#DIV/0!	#DIV/0!	1
35	2000-01-01	1899-12-31 12:00:00	42	0.0666667	#DIV/0!	#DIV/0!	#DIV/0!	#DIV/0!	-0.133333	0.0666667	1	1	1	1	1	1	1	1	1	1	1	1	1	1	0.933333	1	1	1	1	0.933333	1	1	1	1	1	1	1	1	1	1	1	1	1	-0.0666667	#DIV/0!	#DIV/0!	#DIV/0!	#DIV/0!	1
36	2000-01-01	1899-12-31 12:00:00	42	0.0666667	#DIV/0!	#DIV/0!	#DIV/0!	#DIV/0!	-0.133333	0.0666667	1	1	1	1	1	1	1	1	1	1	1	1	1	1	0.933333	1	1	1	1	0.933333	1	1	1	1	1	1	1	1	1	1	1	1	1	-0.0666667	#DIV/0!	#DIV/0!	#DIV/0!	#DIV/0!	1
37	2000-01-01	1899-12-31 12:00:00	42	0.0666667	#DIV/0!	#DIV/0!	#DIV/0!	#DIV/0!	-0.133333	0.0666667	1	1	1	1	1	1	1	1	1	1	1	1	1	1	0.933333	1	1	1	1	0.933333	1	1	1	1	1	1	1	1	1	1	1	1	1	-0.0666667	#DIV/0!	#DIV/0!	#DIV/0!	#DIV/0!	1
38	2000-01-01	1899-12-31 12:00:00	42	0.0666667	#DIV/0!	#DIV/0!	#DIV/0!	#DIV/0!	-0.133333	0.0666667	1	1	1	1	1	1	1	1	1	1	1	1	1	1	0.933333	1	1	1	1	0.933333	1	1	1	1	1	1	1	1	1	1	1	1	1	-0.0666667	#DIV/0!	#DIV/0!	#DIV/0!	#DIV/0!	1
39	2000-01-01	1899-12-31 12:00:00	42	0.0666667	#DIV/0!	#DIV/0!	#DIV/0!	#DIV/0!	-0.133333	0.0666667	1	1	1	1	1	1	1	1	1	1	1	1	1	1	0.933333	1	1	1	1	0.933333	1	1	1	1	1	1	1	1	1	1	1	1	1	-0.0666667	#DIV/0!	#DIV/0!	#DIV/0!	#DIV/0!	1
40	2000-01-01	1899-12-31 12:00:00	42	0.0666667	#DIV/0!	#DIV/0!	#DIV/0!	#DIV/0!	-0.133333	0.0666667	1	1	1	1	1	1	1	1	1	1	1	1	1	1	0.933333	1	1	1	1	0.933333	1	1	1	1	1	1	1	1	1	1	1	1	1	-0.0666667	#DIV/0!	#DIV/0!	#DIV/0!	#DIV/0!	1
41	2000-01-01	1899-12-31 12:00:00	42	0.0666667	#DIV/0!	#DIV/0!	#DIV/0!	#DIV/0!	-0.133333	0.0666667	1	1	1	1	1	1	1	1	1	1	1	1	1	1	0.933333	1	1	1	1	0.933333	1	1	1	1	1	1	1	1	1	1	1	1	1	-0.0666667	#DIV/0!	#DIV/0!	#DIV/0!	#DIV/0!	1
42	2000-01-01	1899-12-31 12:00:00	42	0.0666667	#DIV/0!	#DIV/0!	#DIV/0!	#DIV/0!	-0.133333	0.0666667	1	1	1	1	1	1	1	1	1	1	1	1	1	1	0.933333	1	1	1	1	0.933333	1	1	1	1	1	1	1	1	1	1	1	1	1	-0.0666667	#DIV/0!	#DIV/0!	#DIV/0!	#DIV/0!	1
43	2000-01-01	1899-12-31 12:00:00	42	0.0666667	#DIV/0!	#DIV/0!	#DIV/0!	#DIV/0!	-0.133333	0.0666667	1	1	1	1	1	1	1	1	1	1	1	1	1	1	0.933333	1	1	1	1	0.933333	1	1	1	1	1	1	1	1	1	1	1	1	1	-0.0666667	#DIV/0!	#DIV/0!	#DIV/0!	#DIV/0!	1
44	2000-01-01	1899-12-31 12:00:00	42	0.0666667	#DIV/0!	#DIV/0!	#DIV/0!	#DIV/0!	-0.133333	0.0666667	1	1	1	1	1	1	1	1	1	1	1	1	1	1	0.933333	1	1	1	1	0.933333	1	1	1	1	1	1	1	1	1	1	1	1	1	-0.0666667	#DIV/0!	#DIV/0!	#DIV/0!	#DIV/0!	1
45	2000-01-01	1899-12-31 12:00:00	42	0.0666667	#DIV/0!	#DIV/0!	#DIV/0!	#DIV/0!	-0.133333	0.0666667	1	1	1	1	1	1	1	1	1	1	1	1	1	1	0.933333	1	1	1	1	0.933333	1	1	1	1	1	1	1	1	1	1	1	1	1	-0.0666667	#DIV/0!	#DIV/0!	#DIV/0!	#DIV/0!	1
46	2000-01-01	1899-12-31 12:00:00	42	0.0666667	#DIV/0!	#DIV/0!	#DIV/0!	#DIV/0!	-0.133333	0.0666667	1	1	1	1	1	1	1	1	1	1	1	1	1	1	0.933333	1	1	1	1	0.933333	1	1	1	1	1	1	1	1	1	1	1	1	1	-0.0666667	#DIV/0!	#DIV/0!	#DIV/0!	#DIV/0!	1
47	2000-01-01	1899-12-31 12:00:00	42	0.0666667	#DIV/0!	#DIV/0!	#DIV/0!	#DIV/0!	-0.133333	0.0666667	1	1	1	1	1	1	1	1	1	1	1	1	1	1	0.933333	1	1	1	1	0.933333	1	1	1	1	1	1	1	1	1	1	1	1	1	-0.0666667	#DIV/0!	#DIV/0!	#DIV/0!	#DIV/0!	1
48	2000-01-01	1899-12-31 12:00:00	42	0.0666667	#DIV/0!	#DIV/0!	#DIV/0!	#DIV/0!	-0.133333	0.0666667	1	1	1	1	1	1	1	1	1	1	1	1	1	1	0.933333	1	1	1	1	0.933333	1	1	1	1	1	1	1	1	1	1	1	1	1	-0.0666667	#DIV/0!	#DIV/0!	#DIV/0!	#DIV/0!	1
49	2000-01-01	1899-12-31 12:00:00	42	0.0666667	#DIV/0!	#DIV/0!	#DIV/0!	#DIV/0!	-0.133333	0.0666667	1	1	1	1	1	1	1	1	1	1	1	1	1	1	0.933333	1	1	1	1	0.933333	1	1	1	1	1	1	1	1	1	1	1	1	1	-0.0666667	#DIV/0!	#DIV/0!	#DIV/0!	#DIV/0!	1
50	2000-01-01	1899-12-31 12:00:00	42	0.0666667	#DIV/0!	#DIV/0!	#DIV/0!	#DIV/0!	-0.133333	0.0666667	1	1	1	1	1	1	1	1	1	1	1	1	1	1	0.933333	1	1	1	1	0.933333	1	1	1	1	1	1	1	1	1	1	1	1	1	-0.0666667	#DIV/0!	#DIV/0!	#DIV/0!	#DIV/0!	1
51	2000-01-01	1899-12-31 12:00:00	42	0.0666667	#DIV/0!	#DIV/0!	#DIV/0!	#DIV/0!	-0.133333	0.0666667	1	1	1	1	1	1	1	1	1	1	1	1	1	1	0.933333	1	1	1	1	0.933333	1	1	1	1	1	1	1	1	1	1	1	1	1	-0.0666667	#DIV/0!	#DIV/0!	#DIV/0!	#DIV/0!	1
52	2000-01-01	1899-12-31 12:00:00	42	0.0666667	#DIV/0!	#DIV/0!	#DIV/0!	#DIV/0!	-0.133333	0.0666667	1	1	1	1	1	1	1	1	1	1	1	1	1	1	0.933333	1	1	1	1	0.933333	1	1	1	1	1	1	1	1	1	1	1	1	1	-0.0666667	#DIV/0!	#DIV/0!	#DIV/0!	#DIV/0!	1
53	2000-01-01	1899-12-31 12:00:00	42	0.0666667	#DIV/0!	#DIV/0!	#DIV/0!	#DIV/0!	-0.133333	0.0666667	1	1	1	1	1	1	1	1	1	1	1	1	1	1	0.933333	1	1	1	1	0.933333	1	1	1	1	1	1	1	1	1	1	1	1	1	-0.0666667	#DIV/0!	#DIV/0!	#DIV/0!	#DIV/0!	1
54	2000-01-01	1899-12-31 12:00:00	42	0.0666667	#DIV/0!	#DIV/0!	#DIV/0!	#DIV/0!	-0.133333	0.0666667	1	1	1	1	1	1	1	1	1	1	1	1	1	1	0.933333	1	1	1	1	0.933333	1	1	1	1	1	1	1	1	1	1	1	1	1	-0.0666667	#DIV/0!	#DIV/0!	#DIV/0!	#DIV/0!	1
55	2000-01-01	1899-12-31 12:00:00	42	0.0666667	#DIV/0!	#DIV/0!	#DIV/0!	#DIV/0!	-0.133333	0.0666667	1	1	1	1	1	1	1	1	1	1	1	1	1	1	0.933333	1	1	1	1	0.933333	1	1	1	1	1	1	1	1	1	1	1	1	1	-0.0666667	#DIV/0!	#DIV/0!	#DIV/0!	#DIV/0!	1
56	2000-01-01	1899-12-31 12:00:00	42	0.0666667	#DIV/0!	#DIV/0!	#DIV/0!	#DIV/0!	-0.133333	0.0666667	1	1	1	1	1	1	1	1	1	1	1	1	1	1	0.933333	1	1	1	1	0.933333	1	1	1	1	1	1	1	1	1	1	1	1	1	-0.0666667	#DIV/0!	#DIV/0!	#DIV/0!	#DIV/0!	1
57	2000-01-01	1899-12-31 12:00:00	42	0.0666667	#DIV/0!	#DIV/0!	#DIV/0!	#DIV/0!	-0.133333	0.0666667	1	1	1	1	1	1	1	1	1	1	1	1	1	1	0.933333	1	1	1	1	0.933333	1	1	1	1	1	1	1	1	1	1	1	1	1	-0.0666667	#DIV/0!	#DIV/0!	#DIV/0!	#DIV/0!	1
58	2000-01-01	1899-12-31 12:00:00	42	0.0666667	#DIV/0!	#DIV/0!	#DIV/0!	#DIV/0!	-0.133333	0.0666667	1	1	1	1	1	1	1	1	1	1	1	1	1	1	0.933333	1	1	1	1	0.933333	1	1	1	1	1	1	1	1	1	1	1	1	1	-0.0666667	#DIV/0!	#DIV/0!	#DIV/0!	#DIV/0!	1
59	2000-01-01	1899-12-31 12:00:00	42	0.0666667	#DIV/0!	#DIV/0!	#DIV/0!	#DIV/0!	-0.133333	0.0666667	1	1	1	1	1	1	1	1	1	1	1	1	1	1	0.933333	1	1	1	1	0.933333	1	1	1	1	1	1	1	1	1	1	1	1	1	-0.0666667	#DIV/0!	#DIV/0!	#DIV/0!	#DIV/0!	1
60	2000-01-01	1899-12-31 12:00:00	42	0.0666667	#DIV/0!	#DIV/0!	#DIV/0!	#DIV/0!	-0.133333	0.0666667	1	1	1	1	1	1	1	1	1	1	1	1	1	1	0.933333	1	1	1	1	0.933333	1	1	1	1	1	1	1	1	1	1	1	1	1	-0.0666667	#DIV/0!	#DIV/0!	#DIV/0!	#DIV/0!	1
61	2000-01-01	1899-12-31 12:00:00	42	0.0666667	#DIV/0!	#DIV/0!	#DIV/0!	#DIV/0!	-0.133333	0.0666667	1	1	1	1	1	1	1	1	1	1	1	1	1	1	0.933333	1	1	1	1	0.933333	1	1	1	1	1	1	1	1	1	1	1	1	1	-0.0666667	#DIV/0!	#DIV/0!	#DIV/0!	#DIV/0!	1
62	2000-01-01	1899-12-31 12:00:00	42	0.0666667	#DIV/0!	#DIV/0!	#DIV/0!	#DIV/0!	-0.133333	0.0666667	1	1	1	1	1	1	1	1	1	1	1	1	1	1	0.933333	1	1	1	1	0.933333	1	1	1	1	1	1	1	1	1	1	1	1	1	-0.0666667	#DIV/0!	#DIV/0!	#DIV/0!	#DIV/0!	1
63	2000-01-01	1899-12-31 12:00:00	42	0.0666667	#DIV/0!	#DIV/0!	#DIV/0!	#DIV/0!	-0.133333	0.0666667	1	1	1	1	1	1	1	1	1	1	1	1	1	1	0.933333	1	1	1	1	0.933333	1	1	1	1	1	1	1	1	1	1	1	1	1	-0.0666667	#DIV/0!	#DIV/0!	#DIV/0!	#DIV/0!	1
64	2000-01-01	1899-12-31 12:00:00	42	0.0666667	#DIV/0!	#DIV/0!	#DIV/0!	#DIV/0!	-0.133333	0.0666667	1	1	1	1	1	1	1	1	1	1	1	1	1	1	0.933333	1	1	1	1	0.933333	1	1	1	1	1	1	1	1	1	1	1	1	1	-0.0666667	#DIV/0!	#DIV/0!	#DIV/0!	#DIV/0!	1
65	2000-01-01	1899-12-31 12:00:00	42	0.0666667	#DIV/0!	#DIV/0!	#DIV/0!	#DIV/0!	-0.133333	0.0666667	1	1	1	1	1	1	1	1	1	1	1	1	1	1	0.933333	1	1	1	1	0.933333	1	1	1	1	1	1	1	1	1	1	1	1	1	-0.0666667	#DIV/0!	#DIV/0!	#DIV/0!	#DIV/0!	1
66	2000-01-01	1899-12-31 12:00:00	42	0.0666667	#DIV/0!	#DIV/0!	#DIV/0!	#DIV/0!	-0.133333	0.0666667	1	1	1	1	1	1	1	1	1	1	1	1	1	1	0.933333	1	1	1	1	0.933333	1	1	1	1	1	1	1	1	1	1	1	1	1	-0.0666667	#DIV/0!	#DIV/0!	#DIV/0!	#DIV/0!	1
67	2000-01-01	1899-12-31 12:00:00	42	0.0666667	#DIV/0!	#DIV/0!	#DIV/0!	#DIV/0!	-0.133333	0.0666667	1	1	1	1	1	1	1	1	1	1	1	1	1	1	0.933333	1	1	1	1	0.933333	1	1	1	1	1	1	1	1	1	1	1	1	1	-0.0666667	#DIV/0!	#DIV/0!	#DIV/0!	#DIV/0!	1
68	2000-01-01	1899-12-31 12:00:00	42	0.0666667	#DIV/0!	#DIV/0!	#DIV/0!	#DIV/0!	-0.133333	0.0666667	1	1	1	1	1	1	1	1	1	1	1	1	1	1	0.933333	1	1	1	1	0.933333	1	1	1	1	1	1	1	1	1	1	1	1	1	-0.0666667	#DIV/0!	#DIV/0!	#DIV/0!	#DIV/0!	1
69	2000-01-01	1899-12-31 12:00:00	42	0.0666667	#DIV/0!	#DIV/0!	#DIV/0!	#DIV/0!	-0.133333	0.0666667	1	1	1	1	1	1	1	1	1	1	1	1	1	1	0.933333	1	1	1	1	0.933333	1	1	1	1	1	1	1	1	1	1	1	1	1	-0.0666667	#DIV/0!	#DIV/0!	#DIV/0!	#DIV/0!	1
70	2000-01-01	1899-12-31 12:00:00	42	0.0666667	#DIV/0!	#DIV/0!	#DIV/0!	#DIV/0!	-0.133333	0.0666667	1	1	1	1	1	1	1	1	1	1	1	1	1	1	0.933333	1	1	1	1	0.933333	1	1	1	1	1	1	1	1	1	1	1	1	1	-0.0666667	#DIV/0!	#DIV/0!	#DIV/0!	#DIV/0!	1
71	2000-01-01	1899-12-31 12:00:00	42	0.0666667	#DIV/0!	#DIV/0!	#DIV/0!	#DIV/0!	-0.133333	0.0666667	1	1	1	1	1	1	1	1	1	1	1	1	1	1	0.933333	1	1	1	1	0.933333	1	1	1	1	1	1	1	1	1	1	1	1	1	-0.0666667	#DIV/0!	#DIV/0!	#DIV/0!	#DIV/0!	1
72	2000-01-01	1899-12-31 12:00:00	42	0.0666667	#DIV/0!	#DIV/0!	#DIV/0!	#DIV/0!	-0.133333	0.0666667	1	1	1	1	1	1	1	1	1	1	1	1	1	1	0.933333	1	1	1	1	0.933333	1	1	1	1	1	1	1	1	1	1	1	1	1	-0.0666667	#DIV/0!	#DIV/0!	#DIV/0!	#DIV/0!	1
73	2000-01-01	1899-12-31 12:00:00	42	0.0666667	#DIV/0!	#DIV/0!	#DIV/0!	#DIV/0!	-0.133333	0.0666667	1	1	1	1	1	1	1	1	1	1	1	1	1	1	0.933333	1	1	1	1	0.933333	1	1	1	1	1	1	1	1	1	1	1	1	1	-0.0666667	#DIV/0!	#DIV/0!	#DIV/0!	#DIV/0!	1
74	2000-01-01	1899-12-31 12:00:00	42	0.0666667	#DIV/0!	#DIV/0!	#DIV/0!	#DIV/0!	-0.133333	0.0666667	1	1	1	1	1	1	1	1	1	1	1	1	1	1	0.933333	1	1	1	1	0.933333	1	1	1	1	1	1	1	1	1	1	1	1	1	-0.0666667	#DIV/0!	#DIV/0!	#DIV/0!	#DIV/0!	1
75	2000-01-01	1899-12-31 12:00:00	42	0.0666667	#DIV/0!	#DIV/0!	#DIV/0!	#DIV/0!	-0.133333	0.0666667	1	1	1	1	1	1	1	1	1	1	1	1	1	1	0.933333	1	1	1	1	0.933333	1	1	1	1	1	1	1	1	1	1	1	1	1	-0.0666667	#DIV/0!	#DIV/0!	#DIV/0!	#DIV/0!	1
[truncated: 154 more columns]

## Sheet: log rank data
deaths
log-rank test data												at risk											Expected values
day	InR (RU+)	InR (RU-)	W1118 (RU+)	W1118 (RU-)	InR active (RU+)	InR active (RU-)	InR DN (RU+)	InR DN (RU-)	condition i	condition j		InR (RU+)	InR (RU-)	W1118 (RU+)	W1118 (RU-)	InR active (RU+)	InR active (RU-)	InR DN (RU+)	InR DN (RU-)	condition i	condition j		InR (RU+)									InR (RU-)								W1118 (RU+)							W1118 (RU-)
sum	109	2	80	8	113	3	75	5	0	0													InR (RU-)	W1118 (RU+)	W1118 (RU-)	InR active (RU+)	InR active (RU-)	InR DN (RU+)	InR DN (RU-)	condition i	condition j	W1118 (RU+)	W1118 (RU-)	InR active (RU+)	InR active (RU-)	InR DN (RU+)	InR DN (RU-)	condition i	condition j	W1118 (RU-)	InR active (RU+)	InR active (RU-)	InR DN (RU+)	InR DN (RU-)	condition i	condition j	InR active (RU+)	InR active (RU-)	InR DN (RU+)
0	0	0	0	0	0	0	0	0	0	0		109	2	80	8	113	3	75	5	0	0		0	0	0	0	0	0	0	0	0	0	0	0	0	0	0	0	0	0	0	0	0	0	0	0	0	0	0
3	0	0	0	0	0	0	0	0	0	0		109	2	80	8	113	3	75	5	0	0		0	0	0	0	0	0	0	0	0	0	0	0	0	0	0	0	0	0	0	0	0	0	0	0	0	0	0
6	3	0	11	0	0	0	14	0	0	0		109	2	80	8	113	3	75	5	0	0		2.94595	8.07407	2.79487	1.47297	2.91964	10.0707	2.86842	3	3	0.268293	0	0	0	0.363636	0	0	0	10	4.55959	10.6024	12.9032	10.3529	11	11	0	0	1.3494
8	5	0	7	1	8	1	20	0	0	0		106	2	69	6	113	3	61	5	0	0		4.90741	7.26857	5.67857	6.29224	5.83486	15.8683	4.77477	5	5	0.197183	0.25	0.13913	0.4	0.634921	0	0	0	7.36	5.68681	7.66667	14.3308	6.52703	7	7	0.453782	1.33333	1.8806
10	26	0	34	0	30	0	28	0	0	0		101	2	62	5	105	2	41	5	0	0		25.4951	37.1779	24.7736	27.4563	25.4951	38.4085	24.7736	26	26	1.0625	0	0.560748	0	1.30233	0	0	0	31.4627	23.7605	32.9375	37.3204	31.4627	34	34	1.36364	0	3.04348
13	38	0	24	0	27	1	5	0	0	0		75	2	28	5	75	2	13	5	0	0		37.013	45.1456	35.625	32.5	37.987	36.6477	35.625	38	38	1.6	0	0.701299	0.5	0.666667	0	0	0	20.3636	13.8641	23.3333	19.8049	20.3636	24	24	1.6875	0.714286	1.38889
15	13	0	1	0	7	0	1	0	0	0		37	2	4	5	48	1	8	5	0	0		12.3333	12.6341	11.4524	8.70588	12.6579	11.5111	11.4524	13	13	0.333333	0	0.28	0	0.2	0	0	0	0.444444	0.615385	0.8	0.666667	0.444444	1	1	0.660377	0	0.384615
17	5	0	2	0	2	0	3	0	0	0		24	2	3	5	41	1	7	5	0	0		4.61538	6.22222	4.13793	2.58462	4.8	6.19355	4.13793	5	5	0.8	0	0.0930233	0	0.666667	0	0	0	0.75	0.272727	1.5	1.5	0.75	2	2	0.217391	0	1.25
20	4	0	1	0	10	0	3	2	0	0		19	2	1	5	39	1	4	5	0	0		3.61905	4.75	3.16667	4.58621	3.8	5.78261	4.75	4	4	0.666667	0	0.487805	0	1	0.571429	0	0	0.166667	0.275	0.5	0.8	0.5	1	1	1.13636	0	1.66667
22	4	0	0	0	3	0	0	0	0	0		15	2	0	4	29	1	1	0	0	0		3.52941	4	3.15789	2.38636	3.75	3.75	4	4	4	0	0	0.193548	0	0	0	0	0	0	0	0	0	0	0	0	0.363636	0	0
24	3	0	0	0	1	0	1	0	0	0		11	2	0	4	26	1	1	0	0	0		2.53846	3	2.2	1.18919	2.75	3.66667	3	3	3	0	0	0.0714286	0	0.666667	0	0	0	0	0	0	0	0	0	0	0.133333	0	0.8
27	0	0	0	0	6	0	0	0	0	0		8	2	0	4	25	1	0	0	0	0		0	0	0	1.45455	0	0	0	0	0	0	0	0.444444	0	0	0	0	0	0	0	0	0	0	0	0	0.827586	0	0
29	0	1	0	0	3	0	0	0	0	0		8	2	0	4	19	1	0	0	0	0		0.8	0	0	0.888889	0	0	0	0	0	1	0.333333	0.380952	0.666667	1	1	1	1	0	0	0	0	0	0	0	0.521739	0	0
31	2	0	0	0	3	0	0	0	0	0		8	1	0	4	16	1	0	0	0	0		1.77778	2	1.33333	1.66667	1.77778	2	2	2	2	0	0	0.176471	0	0	0	0	0	0	0	0	0	0	0	0	0.6	0	0
33	3	0	0	0	8	0	0	0	0	0		6	1	0	4	13	1	0	0	0	0		2.57143	3	1.8	3.47368	2.57143	3	3	3	3	0	0	0.571429	0	0	0	0	0	0	0	0	0	0	0	0	1.88235	0	0
36	2	0	0	0	5	0	0	0	0	0		3	1	0	4	5	1	0	0	0	0		1.5	2	0.857143	2.625	1.5	2	2	2	2	0	0	0.833333	0	0	0	0	0	0	0	0	0	0	0	0	2.22222	0	0
39	0	1	0	0	0	1	0	0	0	0		1	1	0	4	0	1	0	0	0	0		0.5	0	0	0	0.5	0	0	0	0	1	0.2	1	1	1	1	1	1	0	0	0	0	0	0	0	0	0.8	0
42	1	0	0	4	0	0	0	0	0	0		1	0	0	4	0	0	0	0	0	0		1	1	1	1	1	1	1	1	1	0	0	0	0	0	0	0	0	0	0	0	0	0	0	0	4	4	4
42	0	0	0	0	0	0	0	0	0	0		0	0	0	0	0	0	0	0	0	0		0	0	0	0	0	0	0	0	0	0	0	0	0	0	0	0	0	0	0	0	0	0	0	0	0	0	0
42	0	0	0	0	0	0	0	0	0	0		0	0	0	0	0	0	0	0	0	0		0	0	0	0	0	0	0	0	0	0	0	0	0	0	0	0	0	0	0	0	0	0	0	0	0	0	0
42	0	0	0	0	0	0	0	0	0	0		0	0	0	0	0	0	0	0	0	0		0	0	0	0	0	0	0	0	0	0	0	0	0	0	0	0	0	0	0	0	0	0	0	0	0	0	0
42	0	0	0	0	0	0	0	0	0	0		0	0	0	0	0	0	0	0	0	0		0	0	0	0	0	0	0	0	0	0	0	0	0	0	0	0	0	0	0	0	0	0	0	0	0	0	0
42	0	0	0	0	0	0	0	0	0	0		0	0	0	0	0	0	0	0	0	0		0	0	0	0	0	0	0	0	0	0	0	0	0	0	0	0	0	0	0	0	0	0	0	0	0	0	0
42	0	0	0	0	0	0	0	0	0	0		0	0	0	0	0	0	0	0	0	0		0	0	0	0	0	0	0	0	0	0	0	0	0	0	0	0	0	0	0	0	0	0	0	0	0	0	0
42	0	0	0	0	0	0	0	0	0	0		0	0	0	0	0	0	0	0	0	0		0	0	0	0	0	0	0	0	0	0	0	0	0	0	0	0	0	0	0	0	0	0	0	0	0	0	0
42	0	0	0	0	0	0	0	0	0	0		0	0	0	0	0	0	0	0	0	0		0	0	0	0	0	0	0	0	0	0	0	0	0	0	0	0	0	0	0	0	0	0	0	0	0	0	0
42	0	0	0	0	0	0	0	0	0	0		0	0	0	0	0	0	0	0	0	0		0	0	0	0	0	0	0	0	0	0	0	0	0	0	0	0	0	0	0	0	0	0	0	0	0	0	0
42	0	0	0	0	0	0	0	0	0	0		0	0	0	0	0	0	0	0	0	0		0	0	0	0	0	0	0	0	0	0	0	0	0	0	0	0	0	0	0	0	0	0	0	0	0	0	0
42	0	0	0	0	0	0	0	0	0	0		0	0	0	0	0	0	0	0	0	0		0	0	0	0	0	0	0	0	0	0	0	0	0	0	0	0	0	0	0	0	0	0	0	0	0	0	0
42	0	0	0	0	0	0	0	0	0	0		0	0	0	0	0	0	0	0	0	0		0	0	0	0	0	0	0	0	0	0	0	0	0	0	0	0	0	0	0	0	0	0	0	0	0	0	0
42	0	0	0	0	0	0	0	0	0	0		0	0	0	0	0	0	0	0	0	0		0	0	0	0	0	0	0	0	0	0	0	0	0	0	0	0	0	0	0	0	0	0	0	0	0	0	0
42	0	0	0	0	0	0	0	0	0	0		0	0	0	0	0	0	0	0	0	0		0	0	0	0	0	0	0	0	0	0	0	0	0	0	0	0	0	0	0	0	0	0	0	0	0	0	0
42	0	0	0	0	0	0	0	0	0	0		0	0	0	0	0	0	0	0	0	0		0	0	0	0	0	0	0	0	0	0	0	0	0	0	0	0	0	0	0	0	0	0	0	0	0	0	0
42	0	0	0	0	0	0	0	0	0	0		0	0	0	0	0	0	0	0	0	0		0	0	0	0	0	0	0	0	0	0	0	0	0	0	0	0	0	0	0	0	0	0	0	0	0	0	0
42	0	0	0	0	0	0	0	0	0	0		0	0	0	0	0	0	0	0	0	0		0	0	0	0	0	0	0	0	0	0	0	0	0	0	0	0	0	0	0	0	0	0	0	0	0	0	0
42	0	0	0	0	0	0	0	0	0	0		0	0	0	0	0	0	0	0	0	0		0	0	0	0	0	0	0	0	0	0	0	0	0	0	0	0	0	0	0	0	0	0	0	0	0	0	0
42	0	0	0	0	0	0	0	0	0	0		0	0	0	0	0	0	0	0	0	0		0	0	0	0	0	0	0	0	0	0	0	0	0	0	0	0	0	0	0	0	0	0	0	0	0	0	0
42	0	0	0	0	0	0	0	0	0	0		0	0	0	0	0	0	0	0	0	0		0	0	0	0	0	0	0	0	0	0	0	0	0	0	0	0	0	0	0	0	0	0	0	0	0	0	0
42	0	0	0	0	0	0	0	0	0	0		0	0	0	0	0	0	0	0	0	0		0	0	0	0	0	0	0	0	0	0	0	0	0	0	0	0	0	0	0	0	0	0	0	0	0	0	0
42	0	0	0	0	0	0	0	0	0	0		0	0	0	0	0	0	0	0	0	0		0	0	0	0	0	0	0	0	0	0	0	0	0	0	0	0	0	0	0	0	0	0	0	0	0	0	0
42	0	0	0	0	0	0	0	0	0	0		0	0	0	0	0	0	0	0	0	0		0	0	0	0	0	0	0	0	0	0	0	0	0	0	0	0	0	0	0	0	0	0	0	0	0	0	0
42	0	0	0	0	0	0	0	0	0	0		0	0	0	0	0	0	0	0	0	0		0	0	0	0	0	0	0	0	0	0	0	0	0	0	0	0	0	0	0	0	0	0	0	0	0	0	0
42	0	0	0	0	0	0	0	0	0	0		0	0	0	0	0	0	0	0	0	0		0	0	0	0	0	0	0	0	0	0	0	0	0	0	0	0	0	0	0	0	0	0	0	0	0	0	0
42	0	0	0	0	0	0	0	0	0	0		0	0	0	0	0	0	0	0	0	0		0	0	0	0	0	0	0	0	0	0	0	0	0	0	0	0	0	0	0	0	0	0	0	0	0	0	0
42	0	0	0	0	0	0	0	0	0	0		0	0	0	0	0	0	0	0	0	0		0	0	0	0	0	0	0	0	0	0	0	0	0	0	0	0	0	0	0	0	0	0	0	0	0	0	0
42	0	0	0	0	0	0	0	0	0	0		0	0	0	0	0	0	0	0	0	0		0	0	0	0	0	0	0	0	0	0	0	0	0	0	0	0	0	0	0	0	0	0	0	0	0	0	0
42	0	0	0	0	0	0	0	0	0	0		0	0	0	0	0	0	0	0	0	0		0	0	0	0	0	0	0	0	0	0	0	0	0	0	0	0	0	0	0	0	0	0	0	0	0	0	0
42	0	0	0	0	0	0	0	0	0	0		0	0	0	0	0	0	0	0	0	0		0	0	0	0	0	0	0	0	0	0	0	0	0	0	0	0	0	0	0	0	0	0	0	0	0	0	0
42	0	0	0	0	0	0	0	0	0	0		0	0	0	0	0	0	0	0	0	0		0	0	0	0	0	0	0	0	0	0	0	0	0	0	0	0	0	0	0	0	0	0	0	0	0	0	0
42	0	0	0	0	0	0	0	0	0	0		0	0	0	0	0	0	0	0	0	0		0	0	0	0	0	0	0	0	0	0	0	0	0	0	0	0	0	0	0	0	0	0	0	0	0	0	0
42	0	0	0	0	0	0	0	0	0	0		0	0	0	0	0	0	0	0	0	0		0	0	0	0	0	0	0	0	0	0	0	0	0	0	0	0	0	0	0	0	0	0	0	0	0	0	0
42	0	0	0	0	0	0	0	0	0	0		0	0	0	0	0	0	0	0	0	0		0	0	0	0	0	0	0	0	0	0	0	0	0	0	0	0	0	0	0	0	0	0	0	0	0	0	0
42	0	0	0	0	0	0	0	0	0	0		0	0	0	0	0	0	0	0	0	0		0	0	0	0	0	0	0	0	0	0	0	0	0	0	0	0	0	0	0	0	0	0	0	0	0	0	0
42	0	0	0	0	0	0	0	0	0	0		0	0	0	0	0	0	0	0	0	0		0	0	0	0	0	0	0	0	0	0	0	0	0	0	0	0	0	0	0	0	0	0	0	0	0	0	0
42	0	0	0	0	0	0	0	0	0	0		0	0	0	0	0	0	0	0	0	0		0	0	0	0	0	0	0	0	0	0	0	0	0	0	0	0	0	0	0	0	0	0	0	0	0	0	0
42	0	0	0	0	0	0	0	0	0	0		0	0	0	0	0	0	0	0	0	0		0	0	0	0	0	0	0	0	0	0	0	0	0	0	0	0	0	0	0	0	0	0	0	0	0	0	0
42	0	0	0	0	0	0	0	0	0	0		0	0	0	0	0	0	0	0	0	0		0	0	0	0	0	0	0	0	0	0	0	0	0	0	0	0	0	0	0	0	0	0	0	0	0	0	0
42	0	0	0	0	0	0	0	0	0	0		0	0	0	0	0	0	0	0	0	0		0	0	0	0	0	0	0	0	0	0	0	0	0	0	0	0	0	0	0	0	0	0	0	0	0	0	0
42	0	0	0	0	0	0	0	0	0	0		0	0	0	0	0	0	0	0	0	0		0	0	0	0	0	0	0	0	0	0	0	0	0	0	0	0	0	0	0	0	0	0	0	0	0	0	0
42	0	0	0	0	0	0	0	0	0	0		0	0	0	0	0	0	0	0	0	0		0	0	0	0	0	0	0	0	0	0	0	0	0	0	0	0	0	0	0	0	0	0	0	0	0	0	0
42	0	0	0	0	0	0	0	0	0	0		0	0	0	0	0	0	0	0	0	0		0	0	0	0	0	0	0	0	0	0	0	0	0	0	0	0	0	0	0	0	0	0	0	0	0	0	0
42	0	0	0	0	0	0	0	0	0	0		0	0	0	0	0	0	0	0	0	0		0	0	0	0	0	0	0	0	0	0	0	0	0	0	0	0	0	0	0	0	0	0	0	0	0	0	0
42	0	0	0	0	0	0	0	0	0	0		0	0	0	0	0	0	0	0	0	0		0	0	0	0	0	0	0	0	0	0	0	0	0	0	0	0	0	0	0	0	0	0	0	0	0	0	0
42	0	0	0	0	0	0	0	0	0	0		0	0	0	0	0	0	0	0	0	0		0	0	0	0	0	0	0	0	0	0	0	0	0	0	0	0	0	0	0	0	0	0	0	0	0	0	0
42	0	0	0	0	0	0	0	0	0	0		0	0	0	0	0	0	0	0	0	0		0	0	0	0	0	0	0	0	0	0	0	0	0	0	0	0	0	0	0	0	0	0	0	0	0	0	0
42	0	0	0	0	0	0	0	0	0	0		0	0	0	0	0	0	0	0	0	0		0	0	0	0	0	0	0	0	0	0	0	0	0	0	0	0	0	0	0	0	0	0	0	0	0	0	0
42	0	0	0	0	0	0	0	0	0	0		0	0	0	0	0	0	0	0	0	0		0	0	0	0	0	0	0	0	0	0	0	0	0	0	0	0	0	0	0	0	0	0	0	0	0	0	0
42	0	0	0	0	0	0	0	0	0	0		0	0	0	0	0	0	0	0	0	0		0	0	0	0	0	0	0	0	0	0	0	0	0	0	0	0	0	0	0	0	0	0	0	0	0	0	0
42	0	0	0	0	0	0	0	0	0	0		0	0	0	0	0	0	0	0	0	0		0	0	0	0	0	0	0	0	0	0	0	0	0	0	0	0	0	0	0	0	0	0	0	0	0	0	0
42	0	0	0	0	0	0	0	0	0	0		0	0	0	0	0	0	0	0	0	0		0	0	0	0	0	0	0	0	0	0	0	0	0	0	0	0	0	0	0	0	0	0	0	0	0	0	0
42	0	0	0	0	0	0	0	0	0	0		0	0	0	0	0	0	0	0	0	0		0	0	0	0	0	0	0	0	0	0	0	0	0	0	0	0	0	0	0	0	0	0	0	0	0	0	0
42	0	0	0	0	0	0	0	0	0	0		0	0	0	0	0	0	0	0	0	0		0	0	0	0	0	0	0	0	0	0	0	0	0	0	0	0	0	0	0	0	0	0	0	0	0	0	0
42	0	0	0	0	0	0	0	0	0	0		0	0	0	0	0	0	0	0	0	0		0	0	0	0	0	0	0	0	0	0	0	0	0	0	0	0	0	0	0	0	0	0	0	0	0	0	0
42	0	0	0	0	0	0	0	0	0	0		0	0	0	0	0	0	0	0	0	0		0	0	0	0	0	0	0	0	0	0	0	0	0	0	0	0	0	0	0	0	0	0	0	0	0	0	0
42	0	0	0	0	0	0	0	0	0	0		0	0	0	0	0	0	0	0	0	0		0	0	0	0	0	0	0	0	0	0	0	0	0	0	0	0	0	0	0	0	0	0	0	0	0	0	0
42	0	0	0	0	0	0	0	0	0	0		0	0	0	0	0	0	0	0	0	0		0	0	0	0	0	0	0	0	0	0	0	0	0	0	0	0	0	0	0	0	0	0	0	0	0	0	0
sum	109	2	80	5	113	3	75	2	0	0													105.146	136.273	97.9774	98.2826	107.344	139.899	103.382	109	109	6.92798	0.783333	5.93361	2.56667	7.50088	2.57143	2	2	70.5474	49.0341	77.3399	87.3259	70.4007	80	80	16.0699	6.84762	15.7636
censors
day	InR (RU+)	InR (RU-)	W1118 (RU+)	W1118 (RU-)	InR active (RU+)	InR active (RU-)	InR DN (RU+)	InR DN (RU-)	condition i	condition j
0	0	0	0	0	0	0	0	0	0	0
3	0	0	0	0	0	0	0	0	0	0
6	0	0	0	2	0	0	0	0	0	0
8	0	0	0	0	0	0	0	0	0	0
10	0	0	0	0	0	0	0	0	0	0
13	0	0	0	0	0	0	0	0	0	0
15	0	0	0	0	0	0	0	0	0	0
17	0	0	0	0	0	0	0	0	0	0
20	0	0	0	1	0	0	0	3	0	0
22	0	0	0	0	0	0	0	0	0	0
24	0	0	0	0	0	0	0	0	0	0
27	0	0	0	0	0	0	0	0	0	0
29	0	0	0	0	0	0	0	0	0	0
31	0	0	0	0	0	0	0	0	0	0
33	0	0	0	0	0	0	0	0	0	0
36	0	0	0	0	0	0	0	0	0	0
39	0	0	0	0	0	0	0	0	0	0
42	0	0	0	0	0	0	0	0	0	0
42	0	0	0	0	0	0	0	0	0	0
42	0	0	0	0	0	0	0	0	0	0
42	0	0	0	0	0	0	0	0	0	0
42	0	0	0	0	0	0	0	0	0	0
42	0	0	0	0	0	0	0	0	0	0
42	0	0	0	0	0	0	0	0	0	0
42	0	0	0	0	0	0	0	0	0	0
42	0	0	0	0	0	0	0	0	0	0
42	0	0	0	0	0	0	0	0	0	0
42	0	0	0	0	0	0	0	0	0	0
42	0	0	0	0	0	0	0	0	0	0
42	0	0	0	0	0	0	0	0	0	0
42	0	0	0	0	0	0	0	0	0	0
42	0	0	0	0	0	0	0	0	0	0
42	0	0	0	0	0	0	0	0	0	0
42	0	0	0	0	0	0	0	0	0	0
42	0	0	0	0	0	0	0	0	0	0
42	0	0	0	0	0	0	0	0	0	0
42	0	0	0	0	0	0	0	0	0	0
42	0	0	0	0	0	0	0	0	0	0
42	0	0	0	0	0	0	0	0	0	0
42	0	0	0	0	0	0	0	0	0	0
42	0	0	0	0	0	0	0	0	0	0
42	0	0	0	0	0	0	0	0	0	0
42	0	0	0	0	0	0	0	0	0	0
42	0	0	0	0	0	0	0	0	0	0
42	0	0	0	0	0	0	0	0	0	0
42	0	0	0	0	0	0	0	0	0	0
42	0	0	0	0	0	0	0	0	0	0
42	0	0	0	0	0	0	0	0	0	0
42	0	0	0	0	0	0	0	0	0	0
42	0	0	0	0	0	0	0	0	0	0
42	0	0	0	0	0	0	0	0	0	0
42	0	0	0	0	0	0	0	0	0	0
42	0	0	0	0	0	0	0	0	0	0
42	0	0	0	0	0	0	0	0	0	0
42	0	0	0	0	0	0	0	0	0	0
42	0	0	0	0	0	0	0	0	0	0
42	0	0	0	0	0	0	0	0	0	0
42	0	0	0	0	0	0	0	0	0	0
42	0	0	0	0	0	0	0	0	0	0
42	0	0	0	0	0	0	0	0	0	0
42	0	0	0	0	0	0	0	0	0	0
42	0	0	0	0	0	0	0	0	0	0
42	0	0	0	0	0	0	0	0	0	0
42	0	0	0	0	0	0	0	0	0	0
42	0	0	0	0	0	0	0	0	0	0
42	0	0	0	0	0	0	0	0	0	0
42	0	0	0	0	0	0	0	0	0	0
42	0	0	0	0	0	0	0	0	0	0
42	0	0	0	0	0	0	0	0	0	0
42	0	0	0	0	0	0	0	0	0	0
42	0	0	0	0	0	0	0	0	0	0
42	0	0	0	0	0	0	0	0	0	0
42	0	0	0	0	0	0	0	0	0	0
42	0	0	0	0	0	0	0	0	0	0
42	0	0	0	0	0	0	0	0	0	0
42	0	0	0	0	0	0	0	0	0	0
[truncated: 63 more columns]

## Sheet: mort data
					deaths
																Nx	number of survivors											proportion of survivors												Ux	negative log of proportion of daily survivors
	count			day	InR (RU+)	InR (RU-)	W1118 (RU+)	W1118 (RU-)	InR active (RU+)	InR active (RU-)	InR DN (RU+)	InR DN (RU-)	condition i	condition j		day	InR (RU+)	InR (RU-)	W1118 (RU+)	W1118 (RU-)	InR active (RU+)	InR active (RU-)	InR DN (RU+)	InR DN (RU-)	condition i	condition j		day	InR (RU+)	InR (RU-)	W1118 (RU+)	W1118 (RU-)	InR active (RU+)	InR active (RU-)	InR DN (RU+)	InR DN (RU-)	condition i	condition j		day	InR (RU+)	InR (RU-)	W1118 (RU+)	W1118 (RU-)	InR active (RU+)	InR active (RU-)	InR DN (RU+)	InR DN (RU-)	condition i
	date	time														est 0	109	105	80	60	113	90	75	75	100	100
0	2017-11-21	1899-12-31 12:00:00		0													109	2	80	8	113	3	75	5	0	0		0	1	1	1	1	1	1	1	1	1	1		0	0	0	0	0	0	0	0	0	0
1	2017-11-24	1899-12-31 12:00:00		3	0	0	0	0	0	0	0	0	0	0		3	109	105	80	60	113	90	75	75	100	100		3	1	1	1	1	1	1	1	1	1	1		3	0	0	0	0	0	0	0	0	0
2	2017-11-27	1899-12-31 12:00:00		6	3	0	11	0	0	0	14	0	0	0		6	106	105	69	58	113	90	61	75	100	100		6	0.972477	1	0.8625	1	1	1	0.813333	1	1	1		6	0.0279088	0	0.14792	0	0	0	0.206614	0	0
3	2017-11-29	1899-12-31 12:00:00		8	5	0	7	1	8	1	20	0	0	0		8	101	105	62	57	105	89	41	75	100	100		8	0.926606	1	0.775	0.982759	0.929204	0.988889	0.546667	1	1	1		8	0.0483186	0	0.106972	0.0173917	0.0734275	0.0111733	0.397302	0	0
4	2017-12-01	1899-12-31 12:00:00		10	26	0	34	0	30	0	28	0	0	0		10	75	105	28	57	75	89	13	75	100	100		10	0.688073	1	0.35	0.982759	0.663717	0.988889	0.173333	1	1	1		10	0.297632	0	0.79493	0	0.336472	0	1.14862	0	0
5	2017-12-04	1899-12-31 12:00:00		13	38	0	24	0	27	1	5	0	0	0		13	37	105	4	57	48	88	8	75	100	100		13	0.33945	1	0.05	0.982759	0.424779	0.977778	0.106667	1	1	1		13	0.70657	0	1.94591	0	0.446287	0.0112996	0.485508	0	0
6	2017-12-06	1899-12-31 12:00:00		15	13	0	1	0	7	0	1	0	0	0		15	24	105	3	57	41	88	7	75	100	100		15	0.220183	1	0.0375	0.982759	0.362832	0.977778	0.0933333	1	1	1		15	0.432864	0	0.287682	0	0.157629	0	0.133531	0	0
7	2017-12-08	1899-12-31 12:00:00		17	5	0	2	0	2	0	3	0	0	0		17	19	105	1	57	39	88	4	75	100	100		17	0.174312	1	0.0125	0.982759	0.345133	0.977778	0.0533333	1	1	1		17	0.233615	0	1.09861	0	0.0500104	0	0.559616	0	0
8	2017-12-11	1899-12-31 12:00:00		20	4	0	1	0	10	0	3	2	0	0		20	15	105	0	56	29	88	1	70	100	100		20	0.137615	1	0	0.982759	0.256637	0.977778	0.0133333	0.973333	1	1		20	0.236389	0	#NUM!	0	0.296266	0	1.38629	0.0270287	0
9	2017-12-13	1899-12-31 12:00:00		22	4	0	0	0	3	0	0	0	0	0		22	11	105	0	56	26	88	1	70	100	100		22	0.100917	1	#DIV/0!	0.982759	0.230088	0.977778	0.0133333	0.973333	1	1		22	0.310155	0	#DIV/0!	0	0.109199	0	0	0	0
10	2017-12-15	1899-12-31 12:00:00		24	3	0	0	0	1	0	1	0	0	0		24	8	105	0	56	25	88	0	70	100	100		24	0.0733945	1	#DIV/0!	0.982759	0.221239	0.977778	0	0.973333	1	1		24	0.318454	0	#DIV/0!	0	0.0392207	0	#NUM!	0	0
11	2017-12-18	1899-12-31 12:00:00		27	0	0	0	0	6	0	0	0	0	0		27	8	105	0	56	19	88	0	70	100	100		27	0.0733945	1	#DIV/0!	0.982759	0.168142	0.977778	#DIV/0!	0.973333	1	1		27	0	0	#DIV/0!	0	0.274437	0	#DIV/0!	0	0
12	2017-12-20	1899-12-31 12:00:00		29	0	1	0	0	3	0	0	0	0	0		29	8	104	0	56	16	88	0	70	100	100		29	0.0733945	0.990476	#DIV/0!	0.982759	0.141593	0.977778	#DIV/0!	0.973333	1	1		29	0	0.00956945	#DIV/0!	0	0.17185	0	#DIV/0!	0	0
13	2017-12-22	1899-12-31 12:00:00		31	2	0	0	0	3	0	0	0	0	0		31	6	104	0	56	13	88	0	70	100	100		31	0.0550459	0.990476	#DIV/0!	0.982759	0.115044	0.977778	#DIV/0!	0.973333	1	1		31	0.287682	0	#DIV/0!	0	0.207639	0	#DIV/0!	0	0
14	2017-12-24	1899-12-31 12:00:00		33	3	0	0	0	8	0	0	0	0	0		33	3	104	0	56	5	88	0	70	100	100		33	0.0275229	0.990476	#DIV/0!	0.982759	0.0442478	0.977778	#DIV/0!	0.973333	1	1		33	0.693147	0	#DIV/0!	0	0.955511	0	#DIV/0!	0	0
15	2017-12-27	1899-12-31 12:00:00		36	2	0	0	0	5	0	0	0	0	0		36	1	104	0	56	0	88	0	70	100	100		36	0.00917431	0.990476	#DIV/0!	0.982759	0	0.977778	#DIV/0!	0.973333	1	1		36	1.09861	0	#DIV/0!	0	#NUM!	0	#DIV/0!	0	0
16	2017-12-30	1899-12-31 12:00:00		39	0	1	0	0	0	1	0	0	0	0		39	1	103	0	56	0	87	0	70	100	100		39	0.00917431	0.980952	#DIV/0!	0.982759	#DIV/0!	0.966667	#DIV/0!	0.973333	1	1		39	0	0.00966191	#DIV/0!	0	#DIV/0!	0.0114287	#DIV/0!	0	0
17	2018-01-02	1899-12-31 12:00:00		42	1	0	0	4	0	0	0	0	0	0		42	0	103	0	52	0	87	0	70	100	100		42	0	0.980952	#DIV/0!	0.912562	#DIV/0!	0.966667	#DIV/0!	0.973333	1	1		42	#NUM!	0	#DIV/0!	0.074108	#DIV/0!	0	#DIV/0!	0	0
18	2000-01-01	1899-12-31 12:00:00		42	0	0	0	0	0	0	0	0	0	0		42	0	103	0	52	0	87	0	70	100	100		42	#DIV/0!	0.980952	#DIV/0!	0.912562	#DIV/0!	0.966667	#DIV/0!	0.973333	1	1		42	#DIV/0!	0	#DIV/0!	0	#DIV/0!	0	#DIV/0!	0	0
19	2000-01-01	1899-12-31 12:00:00		42	0	0	0	0	0	0	0	0	0	0		42	0	103	0	52	0	87	0	70	100	100		42	#DIV/0!	0.980952	#DIV/0!	0.912562	#DIV/0!	0.966667	#DIV/0!	0.973333	1	1		42	#DIV/0!	0	#DIV/0!	0	#DIV/0!	0	#DIV/0!	0	0
20	2000-01-01	1899-12-31 12:00:00		42	0	0	0	0	0	0	0	0	0	0		42	0	103	0	52	0	87	0	70	100	100		42	#DIV/0!	0.980952	#DIV/0!	0.912562	#DIV/0!	0.966667	#DIV/0!	0.973333	1	1		42	#DIV/0!	0	#DIV/0!	0	#DIV/0!	0	#DIV/0!	0	0
21	2000-01-01	1899-12-31 12:00:00		42	0	0	0	0	0	0	0	0	0	0		42	0	103	0	52	0	87	0	70	100	100		42	#DIV/0!	0.980952	#DIV/0!	0.912562	#DIV/0!	0.966667	#DIV/0!	0.973333	1	1		42	#DIV/0!	0	#DIV/0!	0	#DIV/0!	0	#DIV/0!	0	0
22	2000-01-01	1899-12-31 12:00:00		42	0	0	0	0	0	0	0	0	0	0		42	0	103	0	52	0	87	0	70	100	100		42	#DIV/0!	0.980952	#DIV/0!	0.912562	#DIV/0!	0.966667	#DIV/0!	0.973333	1	1		42	#DIV/0!	0	#DIV/0!	0	#DIV/0!	0	#DIV/0!	0	0
23	2000-01-01	1899-12-31 12:00:00		42	0	0	0	0	0	0	0	0	0	0		42	0	103	0	52	0	87	0	70	100	100		42	#DIV/0!	0.980952	#DIV/0!	0.912562	#DIV/0!	0.966667	#DIV/0!	0.973333	1	1		42	#DIV/0!	0	#DIV/0!	0	#DIV/0!	0	#DIV/0!	0	0
24	2000-01-01	1899-12-31 12:00:00		42	0	0	0	0	0	0	0	0	0	0		42	0	103	0	52	0	87	0	70	100	100		42	#DIV/0!	0.980952	#DIV/0!	0.912562	#DIV/0!	0.966667	#DIV/0!	0.973333	1	1		42	#DIV/0!	0	#DIV/0!	0	#DIV/0!	0	#DIV/0!	0	0
25	2000-01-01	1899-12-31 12:00:00		42	0	0	0	0	0	0	0	0	0	0		42	0	103	0	52	0	87	0	70	100	100		42	#DIV/0!	0.980952	#DIV/0!	0.912562	#DIV/0!	0.966667	#DIV/0!	0.973333	1	1		42	#DIV/0!	0	#DIV/0!	0	#DIV/0!	0	#DIV/0!	0	0
26	2000-01-01	1899-12-31 12:00:00		42	0	0	0	0	0	0	0	0	0	0		42	0	103	0	52	0	87	0	70	100	100		42	#DIV/0!	0.980952	#DIV/0!	0.912562	#DIV/0!	0.966667	#DIV/0!	0.973333	1	1		42	#DIV/0!	0	#DIV/0!	0	#DIV/0!	0	#DIV/0!	0	0
27	2000-01-01	1899-12-31 12:00:00		42	0	0	0	0	0	0	0	0	0	0		42	0	103	0	52	0	87	0	70	100	100		42	#DIV/0!	0.980952	#DIV/0!	0.912562	#DIV/0!	0.966667	#DIV/0!	0.973333	1	1		42	#DIV/0!	0	#DIV/0!	0	#DIV/0!	0	#DIV/0!	0	0
28	2000-01-01	1899-12-31 12:00:00		42	0	0	0	0	0	0	0	0	0	0		42	0	103	0	52	0	87	0	70	100	100		42	#DIV/0!	0.980952	#DIV/0!	0.912562	#DIV/0!	0.966667	#DIV/0!	0.973333	1	1		42	#DIV/0!	0	#DIV/0!	0	#DIV/0!	0	#DIV/0!	0	0
29	2000-01-01	1899-12-31 12:00:00		42	0	0	0	0	0	0	0	0	0	0		42	0	103	0	52	0	87	0	70	100	100		42	#DIV/0!	0.980952	#DIV/0!	0.912562	#DIV/0!	0.966667	#DIV/0!	0.973333	1	1		42	#DIV/0!	0	#DIV/0!	0	#DIV/0!	0	#DIV/0!	0	0
30	2000-01-01	1899-12-31 12:00:00		42	0	0	0	0	0	0	0	0	0	0		42	0	103	0	52	0	87	0	70	100	100		42	#DIV/0!	0.980952	#DIV/0!	0.912562	#DIV/0!	0.966667	#DIV/0!	0.973333	1	1		42	#DIV/0!	0	#DIV/0!	0	#DIV/0!	0	#DIV/0!	0	0
31	2000-01-01	1899-12-31 12:00:00		42	0	0	0	0	0	0	0	0	0	0		42	0	103	0	52	0	87	0	70	100	100		42	#DIV/0!	0.980952	#DIV/0!	0.912562	#DIV/0!	0.966667	#DIV/0!	0.973333	1	1		42	#DIV/0!	0	#DIV/0!	0	#DIV/0!	0	#DIV/0!	0	0
32	2000-01-01	1899-12-31 12:00:00		42	0	0	0	0	0	0	0	0	0	0		42	0	103	0	52	0	87	0	70	100	100		42	#DIV/0!	0.980952	#DIV/0!	0.912562	#DIV/0!	0.966667	#DIV/0!	0.973333	1	1		42	#DIV/0!	0	#DIV/0!	0	#DIV/0!	0	#DIV/0!	0	0
33	2000-01-01	1899-12-31 12:00:00		42	0	0	0	0	0	0	0	0	0	0		42	0	103	0	52	0	87	0	70	100	100		42	#DIV/0!	0.980952	#DIV/0!	0.912562	#DIV/0!	0.966667	#DIV/0!	0.973333	1	1		42	#DIV/0!	0	#DIV/0!	0	#DIV/0!	0	#DIV/0!	0	0
34	2000-01-01	1899-12-31 12:00:00		42	0	0	0	0	0	0	0	0	0	0		42	0	103	0	52	0	87	0	70	100	100		42	#DIV/0!	0.980952	#DIV/0!	0.912562	#DIV/0!	0.966667	#DIV/0!	0.973333	1	1		42	#DIV/0!	0	#DIV/0!	0	#DIV/0!	0	#DIV/0!	0	0
35	2000-01-01	1899-12-31 12:00:00		42	0	0	0	0	0	0	0	0	0	0		42	0	103	0	52	0	87	0	70	100	100		42	#DIV/0!	0.980952	#DIV/0!	0.912562	#DIV/0!	0.966667	#DIV/0!	0.973333	1	1		42	#DIV/0!	0	#DIV/0!	0	#DIV/0!	0	#DIV/0!	0	0
36	2000-01-01	1899-12-31 12:00:00		42	0	0	0	0	0	0	0	0	0	0		42	0	103	0	52	0	87	0	70	100	100		42	#DIV/0!	0.980952	#DIV/0!	0.912562	#DIV/0!	0.966667	#DIV/0!	0.973333	1	1		42	#DIV/0!	0	#DIV/0!	0	#DIV/0!	0	#DIV/0!	0	0
37	2000-01-01	1899-12-31 12:00:00		42	0	0	0	0	0	0	0	0	0	0		42	0	103	0	52	0	87	0	70	100	100		42	#DIV/0!	0.980952	#DIV/0!	0.912562	#DIV/0!	0.966667	#DIV/0!	0.973333	1	1		42	#DIV/0!	0	#DIV/0!	0	#DIV/0!	0	#DIV/0!	0	0
38	2000-01-01	1899-12-31 12:00:00		42	0	0	0	0	0	0	0	0	0	0		42	0	103	0	52	0	87	0	70	100	100		42	#DIV/0!	0.980952	#DIV/0!	0.912562	#DIV/0!	0.966667	#DIV/0!	0.973333	1	1		42	#DIV/0!	0	#DIV/0!	0	#DIV/0!	0	#DIV/0!	0	0
39	2000-01-01	1899-12-31 12:00:00		42	0	0	0	0	0	0	0	0	0	0		42	0	103	0	52	0	87	0	70	100	100		42	#DIV/0!	0.980952	#DIV/0!	0.912562	#DIV/0!	0.966667	#DIV/0!	0.973333	1	1		42	#DIV/0!	0	#DIV/0!	0	#DIV/0!	0	#DIV/0!	0	0
40	2000-01-01	1899-12-31 12:00:00		42	0	0	0	0	0	0	0	0	0	0		42	0	103	0	52	0	87	0	70	100	100		42	#DIV/0!	0.980952	#DIV/0!	0.912562	#DIV/0!	0.966667	#DIV/0!	0.973333	1	1		42	#DIV/0!	0	#DIV/0!	0	#DIV/0!	0	#DIV/0!	0	0
41	2000-01-01	1899-12-31 12:00:00		42	0	0	0	0	0	0	0	0	0	0		42	0	103	0	52	0	87	0	70	100	100		42	#DIV/0!	0.980952	#DIV/0!	0.912562	#DIV/0!	0.966667	#DIV/0!	0.973333	1	1		42	#DIV/0!	0	#DIV/0!	0	#DIV/0!	0	#DIV/0!	0	0
42	2000-01-01	1899-12-31 12:00:00		42	0	0	0	0	0	0	0	0	0	0		42	0	103	0	52	0	87	0	70	100	100		42	#DIV/0!	0.980952	#DIV/0!	0.912562	#DIV/0!	0.966667	#DIV/0!	0.973333	1	1		42	#DIV/0!	0	#DIV/0!	0	#DIV/0!	0	#DIV/0!	0	0
43	2000-01-01	1899-12-31 12:00:00		42	0	0	0	0	0	0	0	0	0	0		42	0	103	0	52	0	87	0	70	100	100		42	#DIV/0!	0.980952	#DIV/0!	0.912562	#DIV/0!	0.966667	#DIV/0!	0.973333	1	1		42	#DIV/0!	0	#DIV/0!	0	#DIV/0!	0	#DIV/0!	0	0
44	2000-01-01	1899-12-31 12:00:00		42	0	0	0	0	0	0	0	0	0	0		42	0	103	0	52	0	87	0	70	100	100		42	#DIV/0!	0.980952	#DIV/0!	0.912562	#DIV/0!	0.966667	#DIV/0!	0.973333	1	1		42	#DIV/0!	0	#DIV/0!	0	#DIV/0!	0	#DIV/0!	0	0
45	2000-01-01	1899-12-31 12:00:00		42	0	0	0	0	0	0	0	0	0	0		42	0	103	0	52	0	87	0	70	100	100		42	#DIV/0!	0.980952	#DIV/0!	0.912562	#DIV/0!	0.966667	#DIV/0!	0.973333	1	1		42	#DIV/0!	0	#DIV/0!	0	#DIV/0!	0	#DIV/0!	0	0
46	2000-01-01	1899-12-31 12:00:00		42	0	0	0	0	0	0	0	0	0	0		42	0	103	0	52	0	87	0	70	100	100		42	#DIV/0!	0.980952	#DIV/0!	0.912562	#DIV/0!	0.966667	#DIV/0!	0.973333	1	1		42	#DIV/0!	0	#DIV/0!	0	#DIV/0!	0	#DIV/0!	0	0
47	2000-01-01	1899-12-31 12:00:00		42	0	0	0	0	0	0	0	0	0	0		42	0	103	0	52	0	87	0	70	100	100		42	#DIV/0!	0.980952	#DIV/0!	0.912562	#DIV/0!	0.966667	#DIV/0!	0.973333	1	1		42	#DIV/0!	0	#DIV/0!	0	#DIV/0!	0	#DIV/0!	0	0
48	2000-01-01	1899-12-31 12:00:00		42	0	0	0	0	0	0	0	0	0	0		42	0	103	0	52	0	87	0	70	100	100		42	#DIV/0!	0.980952	#DIV/0!	0.912562	#DIV/0!	0.966667	#DIV/0!	0.973333	1	1		42	#DIV/0!	0	#DIV/0!	0	#DIV/0!	0	#DIV/0!	0	0
49	2000-01-01	1899-12-31 12:00:00		42	0	0	0	0	0	0	0	0	0	0		42	0	103	0	52	0	87	0	70	100	100		42	#DIV/0!	0.980952	#DIV/0!	0.912562	#DIV/0!	0.966667	#DIV/0!	0.973333	1	1		42	#DIV/0!	0	#DIV/0!	0	#DIV/0!	0	#DIV/0!	0	0
50	2000-01-01	1899-12-31 12:00:00		42	0	0	0	0	0	0	0	0	0	0		42	0	103	0	52	0	87	0	70	100	100		42	#DIV/0!	0.980952	#DIV/0!	0.912562	#DIV/0!	0.966667	#DIV/0!	0.973333	1	1		42	#DIV/0!	0	#DIV/0!	0	#DIV/0!	0	#DIV/0!	0	0
51	2000-01-01	1899-12-31 12:00:00		42	0	0	0	0	0	0	0	0	0	0		42	0	103	0	52	0	87	0	70	100	100		42	#DIV/0!	0.980952	#DIV/0!	0.912562	#DIV/0!	0.966667	#DIV/0!	0.973333	1	1		42	#DIV/0!	0	#DIV/0!	0	#DIV/0!	0	#DIV/0!	0	0
52	2000-01-01	1899-12-31 12:00:00		42	0	0	0	0	0	0	0	0	0	0		42	0	103	0	52	0	87	0	70	100	100		42	#DIV/0!	0.980952	#DIV/0!	0.912562	#DIV/0!	0.966667	#DIV/0!	0.973333	1	1		42	#DIV/0!	0	#DIV/0!	0	#DIV/0!	0	#DIV/0!	0	0
53	2000-01-01	1899-12-31 12:00:00		42	0	0	0	0	0	0	0	0	0	0		42	0	103	0	52	0	87	0	70	100	100		42	#DIV/0!	0.980952	#DIV/0!	0.912562	#DIV/0!	0.966667	#DIV/0!	0.973333	1	1		42	#DIV/0!	0	#DIV/0!	0	#DIV/0!	0	#DIV/0!	0	0
54	2000-01-01	1899-12-31 12:00:00		42	0	0	0	0	0	0	0	0	0	0		42	0	103	0	52	0	87	0	70	100	100		42	#DIV/0!	0.980952	#DIV/0!	0.912562	#DIV/0!	0.966667	#DIV/0!	0.973333	1	1		42	#DIV/0!	0	#DIV/0!	0	#DIV/0!	0	#DIV/0!	0	0
55	2000-01-01	1899-12-31 12:00:00		42	0	0	0	0	0	0	0	0	0	0		42	0	103	0	52	0	87	0	70	100	100		42	#DIV/0!	0.980952	#DIV/0!	0.912562	#DIV/0!	0.966667	#DIV/0!	0.973333	1	1		42	#DIV/0!	0	#DIV/0!	0	#DIV/0!	0	#DIV/0!	0	0
56	2000-01-01	1899-12-31 12:00:00		42	0	0	0	0	0	0	0	0	0	0		42	0	103	0	52	0	87	0	70	100	100		42	#DIV/0!	0.980952	#DIV/0!	0.912562	#DIV/0!	0.966667	#DIV/0!	0.973333	1	1		42	#DIV/0!	0	#DIV/0!	0	#DIV/0!	0	#DIV/0!	0	0
57	2000-01-01	1899-12-31 12:00:00		42	0	0	0	0	0	0	0	0	0	0		42	0	103	0	52	0	87	0	70	100	100		42	#DIV/0!	0.980952	#DIV/0!	0.912562	#DIV/0!	0.966667	#DIV/0!	0.973333	1	1		42	#DIV/0!	0	#DIV/0!	0	#DIV/0!	0	#DIV/0!	0	0
58	2000-01-01	1899-12-31 12:00:00		42	0	0	0	0	0	0	0	0	0	0		42	0	103	0	52	0	87	0	70	100	100		42	#DIV/0!	0.980952	#DIV/0!	0.912562	#DIV/0!	0.966667	#DIV/0!	0.973333	1	1		42	#DIV/0!	0	#DIV/0!	0	#DIV/0!	0	#DIV/0!	0	0
59	2000-01-01	1899-12-31 12:00:00		42	0	0	0	0	0	0	0	0	0	0		42	0	103	0	52	0	87	0	70	100	100		42	#DIV/0!	0.980952	#DIV/0!	0.912562	#DIV/0!	0.966667	#DIV/0!	0.973333	1	1		42	#DIV/0!	0	#DIV/0!	0	#DIV/0!	0	#DIV/0!	0	0
60	2000-01-01	1899-12-31 12:00:00		42	0	0	0	0	0	0	0	0	0	0		42	0	103	0	52	0	87	0	70	100	100		42	#DIV/0!	0.980952	#DIV/0!	0.912562	#DIV/0!	0.966667	#DIV/0!	0.973333	1	1		42	#DIV/0!	0	#DIV/0!	0	#DIV/0!	0	#DIV/0!	0	0
61	2000-01-01	1899-12-31 12:00:00		42	0	0	0	0	0	0	0	0	0	0		42	0	103	0	52	0	87	0	70	100	100		42	#DIV/0!	0.980952	#DIV/0!	0.912562	#DIV/0!	0.966667	#DIV/0!	0.973333	1	1		42	#DIV/0!	0	#DIV/0!	0	#DIV/0!	0	#DIV/0!	0	0
62	2000-01-01	1899-12-31 12:00:00		42	0	0	0	0	0	0	0	0	0	0		42	0	103	0	52	0	87	0	70	100	100		42	#DIV/0!	0.980952	#DIV/0!	0.912562	#DIV/0!	0.966667	#DIV/0!	0.973333	1	1		42	#DIV/0!	0	#DIV/0!	0	#DIV/0!	0	#DIV/0!	0	0
63	2000-01-01	1899-12-31 12:00:00		42	0	0	0	0	0	0	0	0	0	0		42	0	103	0	52	0	87	0	70	100	100		42	#DIV/0!	0.980952	#DIV/0!	0.912562	#DIV/0!	0.966667	#DIV/0!	0.973333	1	1		42	#DIV/0!	0	#DIV/0!	0	#DIV/0!	0	#DIV/0!	0	0
64	2000-01-01	1899-12-31 12:00:00		42	0	0	0	0	0	0	0	0	0	0		42	0	103	0	52	0	87	0	70	100	100		42	#DIV/0!	0.980952	#DIV/0!	0.912562	#DIV/0!	0.966667	#DIV/0!	0.973333	1	1		42	#DIV/0!	0	#DIV/0!	0	#DIV/0!	0	#DIV/0!	0	0
65	2000-01-01	1899-12-31 12:00:00		42	0	0	0	0	0	0	0	0	0	0		42	0	103	0	52	0	87	0	70	100	100		42	#DIV/0!	0.980952	#DIV/0!	0.912562	#DIV/0!	0.966667	#DIV/0!	0.973333	1	1		42	#DIV/0!	0	#DIV/0!	0	#DIV/0!	0	#DIV/0!	0	0
66	2000-01-01	1899-12-31 12:00:00		42	0	0	0	0	0	0	0	0	0	0		42	0	103	0	52	0	87	0	70	100	100		42	#DIV/0!	0.980952	#DIV/0!	0.912562	#DIV/0!	0.966667	#DIV/0!	0.973333	1	1		42	#DIV/0!	0	#DIV/0!	0	#DIV/0!	0	#DIV/0!	0	0
67	2000-01-01	1899-12-31 12:00:00		42	0	0	0	0	0	0	0	0	0	0		42	0	103	0	52	0	87	0	70	100	100		42	#DIV/0!	0.980952	#DIV/0!	0.912562	#DIV/0!	0.966667	#DIV/0!	0.973333	1	1		42	#DIV/0!	0	#DIV/0!	0	#DIV/0!	0	#DIV/0!	0	0
68	2000-01-01	1899-12-31 12:00:00		42	0	0	0	0	0	0	0	0	0	0		42	0	103	0	52	0	87	0	70	100	100		42	#DIV/0!	0.980952	#DIV/0!	0.912562	#DIV/0!	0.966667	#DIV/0!	0.973333	1	1		42	#DIV/0!	0	#DIV/0!	0	#DIV/0!	0	#DIV/0!	0	0
69	2000-01-01	1899-12-31 12:00:00		42	0	0	0	0	0	0	0	0	0	0		42	0	103	0	52	0	87	0	70	100	100		42	#DIV/0!	0.980952	#DIV/0!	0.912562	#DIV/0!	0.966667	#DIV/0!	0.973333	1	1		42	#DIV/0!	0	#DIV/0!	0	#DIV/0!	0	#DIV/0!	0	0
70	2000-01-01	1899-12-31 12:00:00		42	0	0	0	0	0	0	0	0	0	0		42	0	103	0	52	0	87	0	70	100	100		42	#DIV/0!	0.980952	#DIV/0!	0.912562	#DIV/0!	0.966667	#DIV/0!	0.973333	1	1		42	#DIV/0!	0	#DIV/0!	0	#DIV/0!	0	#DIV/0!	0	0
71	2000-01-01	1899-12-31 12:00:00		42	0	0	0	0	0	0	0	0	0	0		42	0	103	0	52	0	87	0	70	100	100		42	#DIV/0!	0.980952	#DIV/0!	0.912562	#DIV/0!	0.966667	#DIV/0!	0.973333	1	1		42	#DIV/0!	0	#DIV/0!	0	#DIV/0!	0	#DIV/0!	0	0
72	2000-01-01	1899-12-31 12:00:00		42	0	0	0	0	0	0	0	0	0	0		42	0	103	0	52	0	87	0	70	100	100		42	#DIV/0!	0.980952	#DIV/0!	0.912562	#DIV/0!	0.966667	#DIV/0!	0.973333	1	1		42	#DIV/0!	0	#DIV/0!	0	#DIV/0!	0	#DIV/0!	0	0
73	2000-01-01	1899-12-31 12:00:00		42	0	0	0	0	0	0	0	0	0	0		42	0	103	0	52	0	87	0	70	100	100		42	#DIV/0!	0.980952	#DIV/0!	0.912562	#DIV/0!	0.966667	#DIV/0!	0.973333	1	1		42	#DIV/0!	0	#DIV/0!	0	#DIV/0!	0	#DIV/0!	0	0
74	2000-01-01	1899-12-31 12:00:00		42	0	0	0	0	0	0	0	0	0	0		42	0	103	0	52	0	87	0	70	100	100		42	#DIV/0!	0.980952	#DIV/0!	0.912562	#DIV/0!	0.966667	#DIV/0!	0.973333	1	1		42	#DIV/0!	0	#DIV/0!	0	#DIV/0!	0	#DIV/0!	0	0
75	2000-01-01	1899-12-31 12:00:00		42	0	0	0	0	0	0	0	0	0	0		42	0	103	0	52	0	87	0	70	100	100		42	#DIV/0!	0.980952	#DIV/0!	0.912562	#DIV/0!	0.966667	#DIV/0!	0.973333	1	1		42	#DIV/0!	0	#DIV/0!	0	#DIV/0!	0	#DIV/0!	0	0
				censors
				day	InR (RU+)	InR (RU-)	W1118 (RU+)	W1118 (RU-)	InR active (RU+)	InR active (RU-)	InR DN (RU+)	InR DN (RU-)	condition i	condition j
	2017-11-21	1899-12-31 12:00:00		0	0	0	0	0	0	0	0	0	0	0
1	2017-11-24	1899-12-31 12:00:00		3	0	0	0	0	0	0	0	0	0	0
2	2017-11-27	1899-12-31 12:00:00		6	0	0	0	2	0	0	0	0	0	0
3	2017-11-29	1899-12-31 12:00:00		8	0	0	0	0	0	0	0	0	0	0
4	2017-12-01	1899-12-31 12:00:00		10	0	0	0	0	0	0	0	0	0	0
5	2017-12-04	1899-12-31 12:00:00		13	0	0	0	0	0	0	0	0	0	0
6	2017-12-06	1899-12-31 12:00:00		15	0	0	0	0	0	0	0	0	0	0
7	2017-12-08	1899-12-31 12:00:00		17	0	0	0	0	0	0	0	0	0	0
8	2017-12-11	1899-12-31 12:00:00		20	0	0	0	1	0	0	0	3	0	0
9	2017-12-13	1899-12-31 12:00:00		22	0	0	0	0	0	0	0	0	0	0
10	2017-12-15	1899-12-31 12:00:00		24	0	0	0	0	0	0	0	0	0	0
11	2017-12-18	1899-12-31 12:00:00		27	0	0	0	0	0	0	0	0	0	0
12	2017-12-20	1899-12-31 12:00:00		29	0	0	0	0	0	0	0	0	0	0
13	2017-12-22	1899-12-31 12:00:00		31	0	0	0	0	0	0	0	0	0	0
14	2017-12-24	1899-12-31 12:00:00		33	0	0	0	0	0	0	0	0	0	0
15	2017-12-27	1899-12-31 12:00:00		36	0	0	0	0	0	0	0	0	0	0
16	2017-12-30	1899-12-31 12:00:00		39	0	0	0	0	0	0	0	0	0	0
17	2018-01-02	1899-12-31 12:00:00		42	0	0	0	0	0	0	0	0	0	0
18	2000-01-01	1899-12-31 12:00:00		42	0	0	0	0	0	0	0	0	0	0
19	2000-01-01	1899-12-31 12:00:00		42	0	0	0	0	0	0	0	0	0	0
20	2000-01-01	1899-12-31 12:00:00		42	0	0	0	0	0	0	0	0	0	0
21	2000-01-01	1899-12-31 12:00:00		42	0	0	0	0	0	0	0	0	0	0
22	2000-01-01	1899-12-31 12:00:00		42	0	0	0	0	0	0	0	0	0	0
23	2000-01-01	1899-12-31 12:00:00		42	0	0	0	0	0	0	0	0	0	0
24	2000-01-01	1899-12-31 12:00:00		42	0	0	0	0	0	0	0	0	0	0
25	2000-01-01	1899-12-31 12:00:00		42	0	0	0	0	0	0	0	0	0	0
26	2000-01-01	1899-12-31 12:00:00		42	0	0	0	0	0	0	0	0	0	0
27	2000-01-01	1899-12-31 12:00:00		42	0	0	0	0	0	0	0	0	0	0
28	2000-01-01	1899-12-31 12:00:00		42	0	0	0	0	0	0	0	0	0	0
29	2000-01-01	1899-12-31 12:00:00		42	0	0	0	0	0	0	0	0	0	0
30	2000-01-01	1899-12-31 12:00:00		42	0	0	0	0	0	0	0	0	0	0
31	2000-01-01	1899-12-31 12:00:00		42	0	0	0	0	0	0	0	0	0	0
32	2000-01-01	1899-12-31 12:00:00		42	0	0	0	0	0	0	0	0	0	0
33	2000-01-01	1899-12-31 12:00:00		42	0	0	0	0	0	0	0	0	0	0
34	2000-01-01	1899-12-31 12:00:00		42	0	0	0	0	0	0	0	0	0	0
35	2000-01-01	1899-12-31 12:00:00		42	0	0	0	0	0	0	0	0	0	0
36	2000-01-01	1899-12-31 12:00:00		42	0	0	0	0	0	0	0	0	0	0
37	2000-01-01	1899-12-31 12:00:00		42	0	0	0	0	0	0	0	0	0	0
38	2000-01-01	1899-12-31 12:00:00		42	0	0	0	0	0	0	0	0	0	0
39	2000-01-01	1899-12-31 12:00:00		42	0	0	0	0	0	0	0	0	0	0
40	2000-01-01	1899-12-31 12:00:00		42	0	0	0	0	0	0	0	0	0	0
41	2000-01-01	1899-12-31 12:00:00		42	0	0	0	0	0	0	0	0	0	0
42	2000-01-01	1899-12-31 12:00:00		42	0	0	0	0	0	0	0	0	0	0
43	2000-01-01	1899-12-31 12:00:00		42	0	0	0	0	0	0	0	0	0	0
44	2000-01-01	1899-12-31 12:00:00		42	0	0	0	0	0	0	0	0	0	0
45	2000-01-01	1899-12-31 12:00:00		42	0	0	0	0	0	0	0	0	0	0
46	2000-01-01	1899-12-31 12:00:00		42	0	0	0	0	0	0	0	0	0	0
47	2000-01-01	1899-12-31 12:00:00		42	0	0	0	0	0	0	0	0	0	0
48	2000-01-01	1899-12-31 12:00:00		42	0	0	0	0	0	0	0	0	0	0
49	2000-01-01	1899-12-31 12:00:00		42	0	0	0	0	0	0	0	0	0	0
50	2000-01-01	1899-12-31 12:00:00		42	0	0	0	0	0	0	0	0	0	0
51	2000-01-01	1899-12-31 12:00:00		42	0	0	0	0	0	0	0	0	0	0
52	2000-01-01	1899-12-31 12:00:00		42	0	0	0	0	0	0	0	0	0	0
53	2000-01-01	1899-12-31 12:00:00		42	0	0	0	0	0	0	0	0	0	0
54	2000-01-01	1899-12-31 12:00:00		42	0	0	0	0	0	0	0	0	0	0
55	2000-01-01	1899-12-31 12:00:00		42	0	0	0	0	0	0	0	0	0	0
56	2000-01-01	1899-12-31 12:00:00		42	0	0	0	0	0	0	0	0	0	0
57	2000-01-01	1899-12-31 12:00:00		42	0	0	0	0	0	0	0	0	0	0
58	2000-01-01	1899-12-31 12:00:00		42	0	0	0	0	0	0	0	0	0	0
59	2000-01-01	1899-12-31 12:00:00		42	0	0	0	0	0	0	0	0	0	0
60	2000-01-01	1899-12-31 12:00:00		42	0	0	0	0	0	0	0	0	0	0
61	2000-01-01	1899-12-31 12:00:00		42	0	0	0	0	0	0	0	0	0	0
62	2000-01-01	1899-12-31 12:00:00		42	0	0	0	0	0	0	0	0	0	0
63	2000-01-01	1899-12-31 12:00:00		42	0	0	0	0	0	0	0	0	0	0
64	2000-01-01	1899-12-31 12:00:00		42	0	0	0	0	0	0	0	0	0	0
65	2000-01-01	1899-12-31 12:00:00		42	0	0	0	0	0	0	0	0	0	0
66	2000-01-01	1899-12-31 12:00:00		42	0	0	0	0	0	0	0	0	0	0
67	2000-01-01	1899-12-31 12:00:00		42	0	0	0	0	0	0	0	0	0	0
68	2000-01-01	1899-12-31 12:00:00		42	0	0	0	0	0	0	0	0	0	0
69	2000-01-01	1899-12-31 12:00:00		42	0	0	0	0	0	0	0	0	0	0
70	2000-01-01	1899-12-31 12:00:00		42	0	0	0	0	0	0	0	0	0	0
71	2000-01-01	1899-12-31 12:00:00		42	0	0	0	0	0	0	0	0	0	0
72	2000-01-01	1899-12-31 12:00:00		42	0	0	0	0	0	0	0	0	0	0
73	2000-01-01	1899-12-31 12:00:00		42	0	0	0	0	0	0	0	0	0	0
74	2000-01-01	1899-12-31 12:00:00		42	0	0	0	0	0	0	0	0	0	0
75	2000-01-01	1899-12-31 12:00:00		42	0	0	0	0	0	0	0	0	0	0
[truncated: 84 more columns]

## Sheet: egg data
		treatment start date	2017-11-21																				total eggs laid per ave female
																								food	ave of sum egg production for ave female	error		median LS
	date on food
	time on food																							InR (RU+)	#DIV/0!	#DIV/0!		11.5
	date off food																							InR (RU-)	#DIV/0!	#DIV/0!		0
	time off food																							W1118 (RU+)	#DIV/0!	#DIV/0!		9
	day		-43060		-43060		-43060		-43060		-43060		-43060		-43060		-43060		-43060		-43060			W1118 (RU-)	#DIV/0!	#DIV/0!		0
	time on food (h)		0		0		0		0		0		0		0		0		0		0			InR active (RU+)	#DIV/0!	#DIV/0!		11.5
	fraction of 24h		0		0		0		0		0		0		0		0		0		0			InR active (RU-)	#DIV/0!	#DIV/0!		0
		flies in		flies in		flies in		flies in		flies in		flies in		flies in		flies in		flies in		flies in				InR DN (RU+)	#DIV/0!	#DIV/0!		9
InR (RU+)		vial		vial		vial		vial		vial		vial		vial		vial		vial		vial				InR DN (RU-)	#DIV/0!	#DIV/0!		0
	1	#N/A		#N/A		#N/A		#N/A		#N/A		#N/A		#N/A		#N/A		#N/A		#N/A				condition i	#DIV/0!	#DIV/0!		0
	2	#N/A		#N/A		#N/A		#N/A		#N/A		#N/A		#N/A		#N/A		#N/A		#N/A				condition j	#DIV/0!	#DIV/0!		0
	3	#N/A		#N/A		#N/A		#N/A		#N/A		#N/A		#N/A		#N/A		#N/A		#N/A
	4	#N/A		#N/A		#N/A		#N/A		#N/A		#N/A		#N/A		#N/A		#N/A		#N/A
	5	#N/A		#N/A		#N/A		#N/A		#N/A		#N/A		#N/A		#N/A		#N/A		#N/A
	6	#N/A		#N/A		#N/A		#N/A		#N/A		#N/A		#N/A		#N/A		#N/A		#N/A
	7	#N/A		#N/A		#N/A		#N/A		#N/A		#N/A		#N/A		#N/A		#N/A		#N/A
	8	#N/A		#N/A		#N/A		#N/A		#N/A		#N/A		#N/A		#N/A		#N/A		#N/A
	9	#N/A		#N/A		#N/A		#N/A		#N/A		#N/A		#N/A		#N/A		#N/A		#N/A
	10	#N/A		#N/A		#N/A		#N/A		#N/A		#N/A		#N/A		#N/A		#N/A		#N/A
eggs per 24 h per female
			#DIV/0!																			sum	#DIV/0!
			#DIV/0!																				#DIV/0!
			#DIV/0!																				#DIV/0!
			#DIV/0!																				#DIV/0!
			#DIV/0!																				#DIV/0!
			#DIV/0!																				#DIV/0!
			#DIV/0!																				#DIV/0!
			#DIV/0!																				#DIV/0!
			#DIV/0!																				#DIV/0!
			#DIV/0!																				#DIV/0!
	average		#DIV/0!																			ave	#DIV/0!
	sd		#DIV/0!																			n	0
	n		0																			sd	#DIV/0!
	se		#DIV/0!																			error	#DIV/0!
InR (RU-)
	21	#N/A		#N/A		#N/A		#N/A		#N/A		#N/A		#N/A		#N/A		#N/A		#N/A
	22	#N/A		#N/A		#N/A		#N/A		#N/A		#N/A		#N/A		#N/A		#N/A		#N/A
	23	#N/A		#N/A		#N/A		#N/A		#N/A		#N/A		#N/A		#N/A		#N/A		#N/A
	24	#N/A		#N/A		#N/A		#N/A		#N/A		#N/A		#N/A		#N/A		#N/A		#N/A
	25	#N/A		#N/A		#N/A		#N/A		#N/A		#N/A		#N/A		#N/A		#N/A		#N/A
	26	#N/A		#N/A		#N/A		#N/A		#N/A		#N/A		#N/A		#N/A		#N/A		#N/A
	27	#N/A		#N/A		#N/A		#N/A		#N/A		#N/A		#N/A		#N/A		#N/A		#N/A
	28	#N/A		#N/A		#N/A		#N/A		#N/A		#N/A		#N/A		#N/A		#N/A		#N/A
	29	#N/A		#N/A		#N/A		#N/A		#N/A		#N/A		#N/A		#N/A		#N/A		#N/A
	30	#N/A		#N/A		#N/A		#N/A		#N/A		#N/A		#N/A		#N/A		#N/A		#N/A
eggs per 24 h per female
			#DIV/0!																			sum	#DIV/0!
			#DIV/0!																				#DIV/0!
			#DIV/0!																				#DIV/0!
			#DIV/0!																				#DIV/0!
			#DIV/0!																				#DIV/0!
			#DIV/0!																				#DIV/0!
			#DIV/0!																				#DIV/0!
			#DIV/0!																				#DIV/0!
			#DIV/0!																				#DIV/0!
			#DIV/0!																				#DIV/0!
	average		#DIV/0!																			ave	#DIV/0!
	sd		#DIV/0!																			n	0
	n		0																			sd	#DIV/0!
	se		#DIV/0!																			error	#DIV/0!
W1118 (RU+)
	41	#N/A		#N/A		#N/A		#N/A		#N/A		#N/A		#N/A		#N/A		#N/A		#N/A
	42	#N/A		#N/A		#N/A		#N/A		#N/A		#N/A		#N/A		#N/A		#N/A		#N/A
	43	#N/A		#N/A		#N/A		#N/A		#N/A		#N/A		#N/A		#N/A		#N/A		#N/A
	44	#N/A		#N/A		#N/A		#N/A		#N/A		#N/A		#N/A		#N/A		#N/A		#N/A
	45	#N/A		#N/A		#N/A		#N/A		#N/A		#N/A		#N/A		#N/A		#N/A		#N/A
	46	#N/A		#N/A		#N/A		#N/A		#N/A		#N/A		#N/A		#N/A		#N/A		#N/A
	47	#N/A		#N/A		#N/A		#N/A		#N/A		#N/A		#N/A		#N/A		#N/A		#N/A
	48	#N/A		#N/A		#N/A		#N/A		#N/A		#N/A		#N/A		#N/A		#N/A		#N/A
	49	#N/A		#N/A		#N/A		#N/A		#N/A		#N/A		#N/A		#N/A		#N/A		#N/A
	50	#N/A		#N/A		#N/A		#N/A		#N/A		#N/A		#N/A		#N/A		#N/A		#N/A
eggs per 24 h per female
			#DIV/0!																			sum	#DIV/0!
			#DIV/0!																				#DIV/0!
			#DIV/0!																				#DIV/0!
			#DIV/0!																				#DIV/0!
			#DIV/0!																				#DIV/0!
			#DIV/0!																				#DIV/0!
			#DIV/0!																				#DIV/0!
			#DIV/0!																				#DIV/0!
			#DIV/0!																				#DIV/0!
			#DIV/0!																				#DIV/0!
	average		#DIV/0!																			ave	#DIV/0!
	sd		#DIV/0!																			n	0
	n		0																			sd	#DIV/0!
	se		#DIV/0!																			error	#DIV/0!
W1118 (RU-)
	61	#N/A		#N/A		#N/A		#N/A		#N/A		#N/A		#N/A		#N/A		#N/A		#N/A
	62	#N/A		#N/A		#N/A		#N/A		#N/A		#N/A		#N/A		#N/A		#N/A		#N/A
	63	#N/A		#N/A		#N/A		#N/A		#N/A		#N/A		#N/A		#N/A		#N/A		#N/A
	64	#N/A		#N/A		#N/A		#N/A		#N/A		#N/A		#N/A		#N/A		#N/A		#N/A
	65	#N/A		#N/A		#N/A		#N/A		#N/A		#N/A		#N/A		#N/A		#N/A		#N/A
	66	#N/A		#N/A		#N/A		#N/A		#N/A		#N/A		#N/A		#N/A		#N/A		#N/A
	67	#N/A		#N/A		#N/A		#N/A		#N/A		#N/A		#N/A		#N/A		#N/A		#N/A
	68	#N/A		#N/A		#N/A		#N/A		#N/A		#N/A		#N/A		#N/A		#N/A		#N/A
	69	#N/A		#N/A		#N/A		#N/A		#N/A		#N/A		#N/A		#N/A		#N/A		#N/A
	70	#N/A		#N/A		#N/A		#N/A		#N/A		#N/A		#N/A		#N/A		#N/A		#N/A
eggs per 24 h per female
			#DIV/0!																			sum	#DIV/0!
			#DIV/0!																				#DIV/0!
			#DIV/0!																				#DIV/0!
			#DIV/0!																				#DIV/0!
			#DIV/0!																				#DIV/0!
			#DIV/0!																				#DIV/0!
			#DIV/0!																				#DIV/0!
			#DIV/0!																				#DIV/0!
			#DIV/0!																				#DIV/0!
			#DIV/0!																				#DIV/0!
	average		#DIV/0!																			ave	#DIV/0!
	sd		#DIV/0!																			n	0
	n		0																			sd	#DIV/0!
	se		#DIV/0!																			error	#DIV/0!
InR active (RU+)
	81	#N/A		#N/A		#N/A		#N/A		#N/A		#N/A		#N/A		#N/A		#N/A		#N/A
	82	#N/A		#N/A		#N/A		#N/A		#N/A		#N/A		#N/A		#N/A		#N/A		#N/A
	83	#N/A		#N/A		#N/A		#N/A		#N/A		#N/A		#N/A		#N/A		#N/A		#N/A
	84	#N/A		#N/A		#N/A		#N/A		#N/A		#N/A		#N/A		#N/A		#N/A		#N/A
	85	#N/A		#N/A		#N/A		#N/A		#N/A		#N/A		#N/A		#N/A		#N/A		#N/A
	86	#N/A		#N/A		#N/A		#N/A		#N/A		#N/A		#N/A		#N/A		#N/A		#N/A
	87	#N/A		#N/A		#N/A		#N/A		#N/A		#N/A		#N/A		#N/A		#N/A		#N/A
	88	#N/A		#N/A		#N/A		#N/A		#N/A		#N/A		#N/A		#N/A		#N/A		#N/A
	89	#N/A		#N/A		#N/A		#N/A		#N/A		#N/A		#N/A		#N/A		#N/A		#N/A
	90	#N/A		#N/A		#N/A		#N/A		#N/A		#N/A		#N/A		#N/A		#N/A		#N/A
eggs per 24 h per female
			#DIV/0!																			sum	#DIV/0!
			#DIV/0!																				#DIV/0!
			#DIV/0!																				#DIV/0!
			#DIV/0!																				#DIV/0!
			#DIV/0!																				#DIV/0!
			#DIV/0!																				#DIV/0!
			#DIV/0!																				#DIV/0!
			#DIV/0!																				#DIV/0!
			#DIV/0!																				#DIV/0!
			#DIV/0!																				#DIV/0!
	average		#DIV/0!																			ave	#DIV/0!
	sd		#DIV/0!																			n	0
	n		0																			sd	#DIV/0!
	se		#DIV/0!																			error	#DIV/0!
InR active (RU-)
	101	#N/A		#N/A		#N/A		#N/A		#N/A		#N/A		#N/A		#N/A		#N/A		#N/A
	102	#N/A		#N/A		#N/A		#N/A		#N/A		#N/A		#N/A		#N/A		#N/A		#N/A
	103	#N/A		#N/A		#N/A		#N/A		#N/A		#N/A		#N/A		#N/A		#N/A		#N/A
	104	#N/A		#N/A		#N/A		#N/A		#N/A		#N/A		#N/A		#N/A		#N/A		#N/A
	105	#N/A		#N/A		#N/A		#N/A		#N/A		#N/A		#N/A		#N/A		#N/A		#N/A
	106	#N/A		#N/A		#N/A		#N/A		#N/A		#N/A		#N/A		#N/A		#N/A		#N/A
	107	#N/A		#N/A		#N/A		#N/A		#N/A		#N/A		#N/A		#N/A		#N/A		#N/A
	108	#N/A		#N/A		#N/A		#N/A		#N/A		#N/A		#N/A		#N/A		#N/A		#N/A
	109	#N/A		#N/A		#N/A		#N/A		#N/A		#N/A		#N/A		#N/A		#N/A		#N/A
	110	#N/A		#N/A		#N/A		#N/A		#N/A		#N/A		#N/A		#N/A		#N/A		#N/A
eggs per 24 h per female
			#DIV/0!																			sum	#DIV/0!
			#DIV/0!																				#DIV/0!
			#DIV/0!																				#DIV/0!
			#DIV/0!																				#DIV/0!
			#DIV/0!																				#DIV/0!
			#DIV/0!																				#DIV/0!
			#DIV/0!																				#DIV/0!
			#DIV/0!																				#DIV/0!
			#DIV/0!																				#DIV/0!
			#DIV/0!																				#DIV/0!
	average		#DIV/0!																			ave	#DIV/0!
	sd		#DIV/0!																			n	0
	n		0																			sd	#DIV/0!
	se		#DIV/0!																			error	#DIV/0!
InR DN (RU+)
	121	#N/A		#N/A		#N/A		#N/A		#N/A		#N/A		#N/A		#N/A		#N/A		#N/A
	122	#N/A		#N/A		#N/A		#N/A		#N/A		#N/A		#N/A		#N/A		#N/A		#N/A
	123	#N/A		#N/A		#N/A		#N/A		#N/A		#N/A		#N/A		#N/A		#N/A		#N/A
	124	#N/A		#N/A		#N/A		#N/A		#N/A		#N/A		#N/A		#N/A		#N/A		#N/A
	125	#N/A		#N/A		#N/A		#N/A		#N/A		#N/A		#N/A		#N/A		#N/A		#N/A
	126	#N/A		#N/A		#N/A		#N/A		#N/A		#N/A		#N/A		#N/A		#N/A		#N/A
	127	#N/A		#N/A		#N/A		#N/A		#N/A		#N/A		#N/A		#N/A		#N/A		#N/A
	128	#N/A		#N/A		#N/A		#N/A		#N/A		#N/A		#N/A		#N/A		#N/A		#N/A
	129	#N/A		#N/A		#N/A		#N/A		#N/A		#N/A		#N/A		#N/A		#N/A		#N/A
	130	#N/A		#N/A		#N/A		#N/A		#N/A		#N/A		#N/A		#N/A		#N/A		#N/A
eggs per 24 h per female
			#DIV/0!																			sum	#DIV/0!
			#DIV/0!																				#DIV/0!
			#DIV/0!																				#DIV/0!
			#DIV/0!																				#DIV/0!
			#DIV/0!																				#DIV/0!
			#DIV/0!																				#DIV/0!
			#DIV/0!																				#DIV/0!
			#DIV/0!																				#DIV/0!
			#DIV/0!																				#DIV/0!
			#DIV/0!																				#DIV/0!
	average		#DIV/0!																			ave	#DIV/0!
	sd		#DIV/0!																			n	0
	n		0																			sd	#DIV/0!
	se		#DIV/0!																			error	#DIV/0!
InR DN (RU-)
	141	#N/A		#N/A		#N/A		#N/A		#N/A		#N/A		#N/A		#N/A		#N/A		#N/A
	142	#N/A		#N/A		#N/A		#N/A		#N/A		#N/A		#N/A		#N/A		#N/A		#N/A
	143	#N/A		#N/A		#N/A		#N/A		#N/A		#N/A		#N/A		#N/A		#N/A		#N/A
	144	#N/A		#N/A		#N/A		#N/A		#N/A		#N/A		#N/A		#N/A		#N/A		#N/A
	145	#N/A		#N/A		#N/A		#N/A		#N/A		#N/A		#N/A		#N/A		#N/A		#N/A
	146	#N/A		#N/A		#N/A		#N/A		#N/A		#N/A		#N/A		#N/A		#N/A		#N/A
	147	#N/A		#N/A		#N/A		#N/A		#N/A		#N/A		#N/A		#N/A		#N/A		#N/A
	148	#N/A		#N/A		#N/A		#N/A		#N/A		#N/A		#N/A		#N/A		#N/A		#N/A
	149	#N/A		#N/A		#N/A		#N/A		#N/A		#N/A		#N/A		#N/A		#N/A		#N/A
	150	#N/A		#N/A		#N/A		#N/A		#N/A		#N/A		#N/A		#N/A		#N/A		#N/A
eggs per 24 h per female
			#DIV/0!																			sum	#DIV/0!
			#DIV/0!																				#DIV/0!
			#DIV/0!																				#DIV/0!
			#DIV/0!																				#DIV/0!
			#DIV/0!																				#DIV/0!
			#DIV/0!																				#DIV/0!
			#DIV/0!																				#DIV/0!
			#DIV/0!																				#DIV/0!
			#DIV/0!																				#DIV/0!
			#DIV/0!																				#DIV/0!
	average		#DIV/0!																			ave	#DIV/0!
	sd		#DIV/0!																			n	0
	n		0																			sd	#DIV/0!
	se		#DIV/0!																			error	#DIV/0!
condition i
	161	#N/A		#N/A		#N/A		#N/A		#N/A		#N/A		#N/A		#N/A		#N/A		#N/A
	162	#N/A		#N/A		#N/A		#N/A		#N/A		#N/A		#N/A		#N/A		#N/A		#N/A
	163	#N/A		#N/A		#N/A		#N/A		#N/A		#N/A		#N/A		#N/A		#N/A		#N/A
	164	#N/A		#N/A		#N/A		#N/A		#N/A		#N/A		#N/A		#N/A		#N/A		#N/A
	165	#N/A		#N/A		#N/A		#N/A		#N/A		#N/A		#N/A		#N/A		#N/A		#N/A
	166	#N/A		#N/A		#N/A		#N/A		#N/A		#N/A		#N/A		#N/A		#N/A		#N/A
	167	#N/A		#N/A		#N/A		#N/A		#N/A		#N/A		#N/A		#N/A		#N/A		#N/A
	168	#N/A		#N/A		#N/A		#N/A		#N/A		#N/A		#N/A		#N/A		#N/A		#N/A
	169	#N/A		#N/A		#N/A		#N/A		#N/A		#N/A		#N/A		#N/A		#N/A		#N/A
	170	#N/A		#N/A		#N/A		#N/A		#N/A		#N/A		#N/A		#N/A		#N/A		#N/A
eggs per 24 h per female
			#DIV/0!																			sum	#DIV/0!
			#DIV/0!																				#DIV/0!
			#DIV/0!																				#DIV/0!
			#DIV/0!																				#DIV/0!
			#DIV/0!																				#DIV/0!
			#DIV/0!																				#DIV/0!
			#DIV/0!																				#DIV/0!
			#DIV/0!																				#DIV/0!
			#DIV/0!																				#DIV/0!
			#DIV/0!																				#DIV/0!
	average		#DIV/0!																			ave	#DIV/0!
	sd		#DIV/0!																			n	0
	n		0																			sd	#DIV/0!
	se		#DIV/0!																			error	#DIV/0!
condition j
	181	#N/A		#N/A		#N/A		#N/A		#N/A		#N/A		#N/A		#N/A		#N/A		#N/A
	182	#N/A		#N/A		#N/A		#N/A		#N/A		#N/A		#N/A		#N/A		#N/A		#N/A
	183	#N/A		#N/A		#N/A		#N/A		#N/A		#N/A		#N/A		#N/A		#N/A		#N/A
	184	#N/A		#N/A		#N/A		#N/A		#N/A		#N/A		#N/A		#N/A		#N/A		#N/A
	185	#N/A		#N/A		#N/A		#N/A		#N/A		#N/A		#N/A		#N/A		#N/A		#N/A
	186	#N/A		#N/A		#N/A		#N/A		#N/A		#N/A		#N/A		#N/A		#N/A		#N/A
	187	#N/A		#N/A		#N/A		#N/A		#N/A		#N/A		#N/A		#N/A		#N/A		#N/A
	188	#N/A		#N/A		#N/A		#N/A		#N/A		#N/A		#N/A		#N/A		#N/A		#N/A
	189	#N/A		#N/A		#N/A		#N/A		#N/A		#N/A		#N/A		#N/A		#N/A		#N/A
	190	#N/A		#N/A		#N/A		#N/A		#N/A		#N/A		#N/A		#N/A		#N/A		#N/A
eggs per 24 h per female
			#DIV/0!																			sum	#DIV/0!
			#DIV/0!																				#DIV/0!
			#DIV/0!																				#DIV/0!
			#DIV/0!																				#DIV/0!
			#DIV/0!																				#DIV/0!
			#DIV/0!																				#DIV/0!
			#DIV/0!																				#DIV/0!
			#DIV/0!																				#DIV/0!
			#DIV/0!																				#DIV/0!
			#DIV/0!																				#DIV/0!
	average		#DIV/0!																			ave	#DIV/0!
	sd		#DIV/0!																			n	0
	n		0																			sd	#DIV/0!
	se		#DIV/0!																			error	#DIV/0!

## Sheet: popn per bottle
EXPERIMENT	Gr100 InR alleles
CONDITION	InR (RU+)						sum deaths		109			censored		0								CONDITION	InR active (RU-)						sum deaths		3			censored		0
	1	2	3	4	5	6	7	8	9	10	11	12	13	14	15	16	17	18	19	20			101	102	103	104	105	106	107	108	109	110	111	112	113	114	115	116	117	118	119	120
dead	14	17	16	15	16	17	14	0	0	0	0	0	0	0	0	0	0	0	0	0		dead	0	0	0	0	1	2	0	0	0	0	0	0	0	0	0	0	0	0	0	0
censored	0	0	0	0	0	0	0	0	0	0	0	0	0	0	0	0	0	0	0	0		censored	0	0	0	0	0	0	0	0	0	0	0	0	0	0	0	0	0	0	0	0
remaining per bottle	1	-2	-1	0	-1	-2	1	15	15	15	15	15	15	15	15	15	15	15	15	15		remaining per bottle	15	15	15	15	14	13	15	15	15	15	15	15	15	15	15	15	15	15	15	15
CONDITION	InR (RU-)						sum deaths		2			censored		0								CONDITION	InR DN (RU+)						sum deaths		75			censored		0
	21	22	23	24	25	26	27	28	29	30	31	32	33	34	35	36	37	38	39	40			121	122	123	124	125	126	127	128	129	130	131	132	133	134	135	136	137	138	139	140
dead	0	1	0	0	0	0	1	0	0	0	0	0	0	0	0	0	0	0	0	0		dead	16	15	13	16	15	0	0	0	0	0	0	0	0	0	0	0	0	0	0	0
censored	0	0	0	0	0	0	0	0	0	0	0	0	0	0	0	0	0	0	0	0		censored	0	0	0	0	0	0	0	0	0	0	0	0	0	0	0	0	0	0	0	0
remaining per bottle	15	14	15	15	15	15	14	15	15	15	15	15	15	15	15	15	15	15	15	15		remaining per bottle	-1	0	2	-1	0	15	15	15	15	15	15	15	15	15	15	15	15	15	15	15
CONDITION	W1118 (RU+)						sum deaths		80			censored		0								CONDITION	InR DN (RU-)						sum deaths		2			censored		3
	41	42	43	44	45	46	47	48	49	50	51	52	53	54	55	56	57	58	59	60			141	142	143	144	145	146	147	148	149	150	151	152	153	154	155	156	157	158	159	160
dead	16	18	15	16	15	0	0	0	0	0	0	0	0	0	0	0	0	0	0	0		dead	2	0	0	0	0	0	0	0	0	0	0	0	0	0	0	0	0	0	0	0
censored	0	0	0	0	0	0	0	0	0	0	0	0	0	0	0	0	0	0	0	0		censored	3	0	0	0	0	0	0	0	0	0	0	0	0	0	0	0	0	0	0	0
remaining per bottle	-1	-3	0	-1	0	15	15	15	15	15	15	15	15	15	15	15	15	15	15	15		remaining per bottle	10	15	15	15	15	15	15	15	15	15	15	15	15	15	15	15	15	15	15	15
CONDITION	W1118 (RU-)						sum deaths		5			censored		3								CONDITION	condition i						sum deaths		0			censored		0
	61	62	63	64	65	66	67	68	69	70	71	72	73	74	75	76	77	78	79	80			161	162	163	164	165	166	167	168	169	170	171	172	173	174	175	176	177	178	179	180
dead	1	0	0	4	0	0	0	0	0	0	0	0	0	0	0	0	0	0	0	0		dead	0	0	0	0	0	0	0	0	0	0	0	0	0	0	0	0	0	0	0	0
censored	2	0	0	1	0	0	0	0	0	0	0	0	0	0	0	0	0	0	0	0		censored	0	0	0	0	0	0	0	0	0	0	0	0	0	0	0	0	0	0	0	0
remaining per bottle	12	15	15	10	15	15	15	15	15	15	15	15	15	15	15	15	15	15	15	15		remaining per bottle	10	10	10	10	10	10	10	10	10	10	10	10	10	10	10	10	10	10	10	10
CONDITION	InR active (RU+)						sum deaths		113			censored		0								CONDITION	condition j						sum deaths		0			censored		0
	81	82	83	84	85	86	87	88	89	90	91	92	93	94	95	96	97	98	99	100			181	182	183	184	185	186	187	188	189	190	191	192	193	194	195	196	197	198	199	200
dead	14	15	16	18	14	17	17	0	2	0	0	0	0	0	0	0	0	0	0	0		dead	0	0	0	0	0	0	0	0	0	0	0	0	0	0	0	0	0	0	0	0
censored	0	0	0	0	0	0	0	0	0	0	0	0	0	0	0	0	0	0	0	0		censored	0	0	0	0	0	0	0	0	0	0	0	0	0	0	0	0	0	0	0	0
remaining per bottle	1	0	-1	-3	1	-2	-2	15	13	15	15	15	15	15	15	15	15	15	15	15		remaining per bottle	10	10	10	10	10	10	10	10	10	10	10	10	10	10	10	10	10	10	10	10

## Sheet: sheet(1)
EXPERIMENT	GR100 x
DAY	3
DATE	2017-11-24						time		1899-12-31 12:00:00
CONDITION	InR (RU+)						sum deaths		0			censored		0								CONDITION	InR active (RU-)						sum deaths		0			censored		0
	1	2	3	4	5	6	7	8	9	10	11	12	13	14	15	16	17	18	19	20			101	102	103	104	105	106	107	108	109	110	111	112	113	114	115	116	117	118	119	120
dead																						dead
carried over																						carried over
censored																						censored
CONDITION	InR (RU-)						sum deaths		0			censored		0								CONDITION	InR DN (RU+)						sum deaths		0			censored		0
	21	22	23	24	25	26	27	28	29	30	31	32	33	34	35	36	37	38	39	40			121	122	123	124	125	126	127	128	129	130	131	132	133	134	135	136	137	138	139	140
dead																						dead
carried over																						carried over
censored																						censored
CONDITION	W1118 (RU+)						sum deaths		0			censored		0								CONDITION	InR DN (RU-)						sum deaths		0			censored		0
	41	42	43	44	45	46	47	48	49	50	51	52	53	54	55	56	57	58	59	60			141	142	143	144	145	146	147	148	149	150	151	152	153	154	155	156	157	158	159	160
dead																						dead
carried over																						carried over
censored																						censored
CONDITION	W1118 (RU-)						sum deaths		0			censored		0								CONDITION	condition i						sum deaths		0			censored		0
	61	62	63	64	65	66	67	68	69	70	71	72	73	74	75	76	77	78	79	80			161	162	163	164	165	166	167	168	169	170	171	172	173	174	175	176	177	178	179	180
dead																						dead
carried over																						carried over
censored																						censored
CONDITION	InR active (RU+)						sum deaths		0			censored		0								CONDITION	condition j						sum deaths		0			censored		0
	81	82	83	84	85	86	87	88	89	90	91	92	93	94	95	96	97	98	99	100			181	182	183	184	185	186	187	188	189	190	191	192	193	194	195	196	197	198	199	200
dead																						dead
carried over																						carried over
censored																						censored

[truncated: 74 more sheets: sheet(2), sheet(3), sheet(4), sheet(5), sheet(6), sheet(7), sheet(8), sheet(9), sheet(10), sheet(11), sheet(12), sheet(13), sheet (14), sheet (15), sheet (16), sheet (17), sheet (18), sheet (19), sheet (20), sheet (21) …]
