# Supplementary material for: Enhanced insulin signalling ameliorates C9orf72 hexanucleotide repeat expansion toxicity in Drosophila
Source: eLife journal article supplement (doi:10.7554/elife.58565), 2021-03-19
Supplement: supp [file elife-58565-supp-v1.zip › elife_poa_e58565_Figure_5_source_data_1.xlsx]

## Sheet: Sheet1
N=1
Normalised
	Raw Data (lens)
	1	2	3	4	5	6	7	8	9	10	11	12
A	2.89321	3.01575	4.33567	12.8914	15.8319	19.0938
B	3.18971	2.27852	3.50171	11.2319	15.4925	19.5143
C	3.25533	2.40803	3.2419	12.027	15.5561	26.0106
D	2.85853	2.16322	2.1249	2.18996
E	2.67718	2.4891	1.74719	2.0222
F	2.74783	2.30195	2.49875	1.88149
G
H
	Normalised to DMSO (each triplicate)
DMSO mean	DMSO
3.11275	0.929472	0.968837	1.39288	4.14148	5.08615	6.13406	MK2206
	1.02472	0.731995	1.12496	3.60834	4.9771	6.26914
	1.0458	0.773604	1.04149	3.8638	4.99755	8.35616
2.76118	0.918329	0.694956	0.682645	0.703546			SF1670
	0.860069	0.799646	0.5613	0.64965
	0.882765	0.739522	0.802747	0.604446
N=2
Normalised
	Raw Data (lens)
	1	2	3	4	5	6	7	8	9	10	11	12
A	0.206957	0.201612	0.194685	0.226272	0.473002	0.473877
B	0.263597	0.238683	0.219701	0.339274	0.347931	0.462884
C	0.202207	0.160624	0.16963	0.299352	0.43398	0.464509
D	0.182348	0.171178	0.171269	0.117871
E	0.200931	0.193818	0.169102	0.138407
F	0.18361	0.168955	0.16048	0.113674
G
H
DMSO Average
	0.224253
	0.922869	0.899035	0.868148	1.009	2.10923	2.11313
	1.17544	1.06435	0.979701	1.5129	1.55151	2.06411
	0.901691	0.716261	0.756422	1.33488	1.93522	2.07136
	0.813135	0.763321	0.763731	0.525616
	0.896	0.86428	0.754066	0.61719
	0.818759	0.753411	0.715619	0.5069
N=3
Normalised
	Raw Data (lens)
	1	2	3	4	5	6	7	8	9	10	11	12
A	1.21587	3.61167	4.11563	1.05712
B	1.3674	4.36888	4.61603	1.32019
C	1.72899	4.13971	5.1153	1.39464
D	1.43161	4.89231	5.54389	1.77112
E
F
G
H
N=3
	1.43597
	0.846723	2.51515	2.8661	0.643531
	0.952253	3.04246	3.21458	0.976714
	1.20406	2.88288	3.56227	0.989057
	0.996966	3.40698	3.86074
Normalised
	Raw Data (lens)
	1	2	3	4	5	6	7	8	9	10	11	12
A	1.42868	3.59313	5.64669	1.11528
B	1.13293	3.73025	5.33454	1.64865
C	1.41318	3.87798	5.64817	1.30014
D	1.1022	3.82789	5.20023	0.770915
E
F
G
H
N=4
	1.26925
	1.12561	2.83092	4.44886	0.878697
	0.892602	2.93895	4.20292	1.29892
	1.1134	3.05534	4.45002	1.02434
	0.868389	3.01588	4.0971	0.60738
All N's together
							Mean of each N only
	DMSO	MK2206 1uM	MK2206 2uM	SF1670 1uM				DMSO	MK2206 1uM	MK2206 2uM	SF1670 1uM
	0.929472	4.14148	5.08615	0.703546				1	3.87121	5.02027	0.652547
	1.02472	3.60834	4.9771	0.64965
	1.0458	3.8638	4.99755	0.604446
	0.922869	1.009	2.10923	0.525616				1	1.2856	1.86532	0.549902
	1.17544	1.5129	1.55151	0.61719
	0.901691	1.33488	1.93522	0.5069
	0.846723	2.83092	2.8661	0.643531				1	2.96027	3.37592	0.869767
	0.952253	2.93895	3.21458	0.976714
	1.20406	3.05534	3.56227	0.989057
	0.996966	3.01588	3.86074	0.878697
	1.12561	2.51515	4.44886	1.29892				1	2.96187	4.29972	0.952334
	0.892602	3.04246	4.20292	1.02434
	1.1134	2.88288	4.45002	0.60738
	0.868389	3.40698	4.0971
