# Supplementary material for: Enhanced insulin signalling ameliorates C9orf72 hexanucleotide repeat expansion toxicity in Drosophila
Source: eLife journal article supplement (doi:10.7554/elife.58565), 2021-03-19
Supplement: supp [file elife-58565-supp-v1.zip › elife_poa_e58565_Figure_6_figure_supplement_1_source_data_1.xls]

## Sheet: summary
experiment	Lifespan Insulin injection			start	2020-08-10
notes				day	date	day	date	day	date	day	date
				1	2020-08-11	26	2020-09-05	51	2020-09-30	76	2020-10-25
				2	2020-08-12	27	2020-09-06	52	2020-10-01	77	2020-10-26
				3	2020-08-13	28	2020-09-07	53	2020-10-02	78	2020-10-27
				4	2020-08-14	29	2020-09-08	54	2020-10-03	79	2020-10-28
				5	2020-08-15	30	2020-09-09	55	2020-10-04	80	2020-10-29
				6	2020-08-16	31	2020-09-10	56	2020-10-05	81	2020-10-30
				7	2020-08-17	32	2020-09-11	57	2020-10-06	82	2020-10-31
				8	2020-08-18	33	2020-09-12	58	2020-10-07	83	2020-11-01
				9	2020-08-19	34	2020-09-13	59	2020-10-08	84	2020-11-02
				10	2020-08-20	35	2020-09-14	60	2020-10-09	85	2020-11-03
				11	2020-08-21	36	2020-09-15	61	2020-10-10	86	2020-11-04
				12	2020-08-22	37	2020-09-16	62	2020-10-11	87	2020-11-05
				13	2020-08-23	38	2020-09-17	63	2020-10-12	88	2020-11-06
				14	2020-08-24	39	2020-09-18	64	2020-10-13	89	2020-11-07
				15	2020-08-25	40	2020-09-19	65	2020-10-14	90	2020-11-08
				16	2020-08-26	41	2020-09-20	66	2020-10-15	91	2020-11-09
				17	2020-08-27	42	2020-09-21	67	2020-10-16	92	2020-11-10
				18	2020-08-28	43	2020-09-22	68	2020-10-17	93	2020-11-11
				19	2020-08-29	44	2020-09-23	69	2020-10-18	94	2020-11-12
				20	2020-08-30	45	2020-09-24	70	2020-10-19	95	2020-11-13
				21	2020-08-31	46	2020-09-25	71	2020-10-20	96	2020-11-14
				22	2020-09-01	47	2020-09-26	72	2020-10-21	97	2020-11-15
				23	2020-09-02	48	2020-09-27	73	2020-10-22	98	2020-11-16
				24	2020-09-03	49	2020-09-28	74	2020-10-23	99	2020-11-17
				25	2020-09-04	50	2020-09-29	75	2020-10-24	100	2020-11-18
	1	2	3	4	5	6	7	8	9	10
condition	PBS RU+(G4C2)36	0.3 mg/ml RU- (G4C2)36	0.03 mh/ml RU+ (G4C2)36	PBS RU-(G4C2)36	0.3mg/ml (G4C2)36 Ru+		(G4C2)36 RU+ 3mg/ml	0.03mg/ml (G4C23)36 RU-	-	-
container	vials	vials	vials	vials	vials	vials	vials	vials	vials	vials
flies per container	15	15	15	15	15	15	15	15	15	15
# containers	10	10	7	5	10	10	7	10	10	10
calculated start #	150	150	105	75	150	150	105	150	150	150
total deaths	126	133	83	70	142	132	105	128	0	0
total censors	31	7	10	8	14	#REF!	0	13	0	0
actual start #	157	140	93	78	156	#REF!	105	141	0	0
condition	PBS RU+(G4C2)36	0.3 mg/ml RU- (G4C2)36	0.03 mh/ml RU+ (G4C2)36	PBS RU-(G4C2)36	0.3mg/ml (G4C2)36 Ru+	0	(G4C2)36 RU+ 3mg/ml	0.03mg/ml (G4C23)36 RU-	-	-	condition
gender	female	female	female	female	female	female	female	female	female	female	gender
mating status	mated 48h	mated 48h	mated 48h	mated 48h	mated 48h	mated 48h	mated 48h	mated 48h	mated 48h	mated 48h	mating status
Wolbachia infected	Yes	Yes	Yes	Yes	Yes	Yes	Yes	Yes	Yes	Yes	Wolbachia infected
temperature	25 C	25 C	25 C	25 C	25 C	25 C	25 C	25 C	25 C	25 C	temperature
base food	1 SY	1 SY	1 SY	1 SY	1 SY	1 SY	1 SY	1 SY	1 SY	1 SY	base food
yeast batch											yeast batch
food addition											food addition
other envir. descriptor 1											other envir. descriptor 1
other envir. descriptor 2											other envir. descriptor 2
other envir. descriptor 3											other envir. descriptor 3
background / strain	Dahomey	Dahomey	Dahomey	Dahomey	Dahomey	Dahomey	Dahomey	Dahomey	Dahomey	Dahomey	background / strain
genetic alteration 1											genetic alteration 1
genetic alteration 2											genetic alteration 2
genetic alteration 3											genetic alteration 3

## Sheet: stats
Lifespan Insulin injection				note: values will only be accurate at the end of the experiment
chi-squared values
		PBS RU+(G4C2)36	0.3 mg/ml RU- (G4C2)36	0.03 mh/ml RU+ (G4C2)36	PBS RU-(G4C2)36	0.3mg/ml (G4C2)36 Ru+	0	(G4C2)36 RU+ 3mg/ml	0.03mg/ml (G4C23)36 RU-	-	-
	PBS RU+(G4C2)36		127.368	4.32231	156.069	2.9984	#REF!	298.692	261.862	#DIV/0!	#DIV/0!
	0.3 mg/ml RU- (G4C2)36			90.8913	15.3127	127.794	#REF!	287.374	8.56952	#DIV/0!	#DIV/0!
	0.03 mh/ml RU+ (G4C2)36				134.709	0.484454	#REF!	204.601	240.196	#DIV/0!	#DIV/0!
	PBS RU-(G4C2)36					160.531	#REF!	178.762	4.27426	#DIV/0!	#DIV/0!
	0.3mg/ml (G4C2)36 Ru+						#REF!	293.689	272.627	#DIV/0!	#DIV/0!
	0							#REF!	#REF!	#REF!	#REF!
	(G4C2)36 RU+ 3mg/ml								280.073	#DIV/0!	#DIV/0!
	0.03mg/ml (G4C23)36 RU-									#DIV/0!	#DIV/0!
	-										#DIV/0!
	-
chi-squared p-value for log-rank test on survivorship data
		PBS RU+(G4C2)36	0.3 mg/ml RU- (G4C2)36	0.03 mh/ml RU+ (G4C2)36	PBS RU-(G4C2)36	0.3mg/ml (G4C2)36 Ru+	0	(G4C2)36 RU+ 3mg/ml	0.03mg/ml (G4C23)36 RU-	-	-
	median (d)	22	47.5	22	54.5	22	0	3	50	0	0
	mean (d)	23.349	43.6953	25.7847	53.5465	25.0037	0	3.71429	52.517	0	0
	maximum (d)	39	64	40.5	71	40.5	0	5.5	61.5	0	0
	PBS RU+(G4C2)36		1.54293e-29	0.0376158	8.17562e-36	0.0833469	#REF!	6.34866e-67	6.74075e-59	#DIV/0!	#DIV/0!
	0.3 mg/ml RU- (G4C2)36			1.51789e-21	9.11021e-05	1.24506e-29	#REF!	1.85713e-64	0.00341838	#DIV/0!	#DIV/0!
	0.03 mh/ml RU+ (G4C2)36				3.82277e-31	0.486412	#REF!	2.06984e-46	3.56464e-54	#DIV/0!	#DIV/0!
	PBS RU-(G4C2)36					8.66443e-37	#REF!	9.03158e-41	0.0386939	#DIV/0!	#DIV/0!
	0.3mg/ml (G4C2)36 Ru+						#REF!	7.81278e-66	3.03625e-61	#DIV/0!	#DIV/0!
	0							#REF!	#REF!	#REF!	#REF!
	(G4C2)36 RU+ 3mg/ml								7.23962e-63	#DIV/0!	#DIV/0!
	0.03mg/ml (G4C23)36 RU-									#DIV/0!	#DIV/0!
	-										#DIV/0!
	-

## Sheet: cumulative dths per bottle
			deaths
				bottle number
	date	time	day	1	2	3	4	5	6	7	8	9	10	11	12	13	14	15	16	17	18	19	20	21	22	23	24	25	26	27	28	29	30	31	32	33	34	35	36	37	38	39	40	41	42	43	44	45	46
	2020-08-10	1899-12-31 12:00:00		13	16	18	18	15	15	13	14	19	16	0	0	0	0	0	0	0	0	0	0	17	14	15	14	15	12	14	13	13	13	0	0	0	0	0	0	0	0	0	0	10	15	13	13	16	12
1	2020-08-12	1899-12-31 12:00:00	2	0	0	0	0	0	0	0	0	0	0	0	0	0	0	0	0	0	0	0	0	0	0	0	0	0	0	0	0	0	0	0	0	0	0	0	0	0	0	0	0	0	0	0	0	0	0
2	2020-08-14	1899-12-31 12:00:00	4	0	0	0	0	0	0	0	0	0	0	0	0	0	0	0	0	0	0	0	0	0	0	0	0	0	0	0	0	0	0	0	0	0	0	0	0	0	0	0	0	0	0	0	0	0	0
3	2020-08-17	1899-12-31 12:00:00	7	0	0	0	2	0	0	0	0	0	1	0	0	0	0	0	0	0	0	0	0	0	0	0	0	0	0	0	0	0	0	0	0	0	0	0	0	0	0	0	0	0	0	0	0	0	1
4	2020-08-19	1899-12-31 12:00:00	9	0	0	0	0	0	0	0	0	0	0	0	0	0	0	0	0	0	0	0	0	0	0	0	0	0	0	0	0	0	0	0	0	0	0	0	0	0	0	0	0	0	0	0	0	0	0
5	2020-08-21	1899-12-31 12:00:00	11	0	2	2	0	1	0	0	0	0	1	0	0	0	0	0	0	0	0	0	0	0	0	0	0	0	0	0	0	0	1	0	0	0	0	0	0	0	0	0	0	1	0	0	2	0	2
6	2020-08-24	1899-12-31 12:00:00	14	0	0	1	0	3	1	1	0	2	0	0	0	0	0	0	0	0	0	0	0	0	0	0	0	0	0	1	0	0	0	0	0	0	0	0	0	0	0	0	0	0	0	0	0	1	0
7	2020-08-26	1899-12-31 12:00:00	16	0	0	1	1	0	3	1	0	0	0	0	0	0	0	0	0	0	0	0	0	0	1	0	0	0	0	0	0	1	0	0	0	0	0	0	0	0	0	0	0	0	0	0	0	0	0
8	2020-08-28	1899-12-31 12:00:00	18	0	0	0	1	1	0	3	0	1	0	0	0	0	0	0	0	0	0	0	0	5	2	0	0	0	0	0	0	0	0	0	0	0	0	0	0	0	0	0	0	0	0	0	0	0	0
9	2020-08-31	1899-12-31 12:00:00	21	4	3	6	6	1	2	5	5	2	3	0	0	0	0	0	0	0	0	0	0	8	1	1	1	2	1	2	0	0	1	0	0	0	0	0	0	0	0	0	0	4	4	5	2	2	4
10	2020-09-02	1899-12-31 12:00:00	23	2	1	4	4	1	2	0	1	4	2	0	0	0	0	0	0	0	0	0	0	1	1	1	0	1	0	0	1	0	0	0	0	0	0	0	0	0	0	0	0	2	1	1	1	2	2
11	2020-09-04	1899-12-31 12:00:00	25	2	1	0	0	0	3	0	2	1	0	0	0	0	0	0	0	0	0	0	0	0	0	0	2	0	0	0	0	0	0	0	0	0	0	0	0	0	0	0	0	0	2	1	0	1	1
12	2020-09-07	1899-12-31 12:00:00	28	0	1	0	2	1	1	0	1	3	2	0	0	0	0	0	0	0	0	0	0	1	1	0	1	0	0	0	0	0	0	0	0	0	0	0	0	0	0	0	0	1	2	0	1	0	0
13	2020-09-09	1899-12-31 12:00:00	30	0	2	0	0	0	1	0	0	0	0	0	0	0	0	0	0	0	0	0	0	0	0	2	0	0	0	0	0	0	0	0	0	0	0	0	0	0	0	0	0	0	1	0	1	2	0
14	2020-09-12	1899-12-31 12:00:00	33	1	0	0	1	1	0	0	0	0	1	0	0	0	0	0	0	0	0	0	0	1	1	1	0	0	0	0	0	1	0	0	0	0	0	0	0	0	0	0	0	0	2	2	2	5	1
15	2020-09-13	1899-12-31 12:00:00	34	0	0	0	1	0	0	1	1	0	1	0	0	0	0	0	0	0	0	0	0	0	0	1	0	0	0	0	0	0	0	0	0	0	0	0	0	0	0	0	0	0	1	0	1	0	0
16	2020-09-16	1899-12-31 12:00:00	37	0	0	1	0	1	0	0	0	0	0	0	0	0	0	0	0	0	0	0	0	1	0	0	0	0	0	0	0	0	0	0	0	0	0	0	0	0	0	0	0	0	0	0	0	0	0
17	2020-09-18	1899-12-31 12:00:00	39	0	0	0	0	0	0	0	0	0	0	0	0	0	0	0	0	0	0	0	0	0	0	0	1	0	0	0	0	0	0	0	0	0	0	0	0	0	0	0	0	0	0	0	0	0	0
18	2020-09-21	1899-12-31 12:00:00	42	0	1	0	0	0	0	1	0	1	0	0	0	0	0	0	0	0	0	0	0	0	0	0	0	0	0	0	0	0	0	0	0	0	0	0	0	0	0	0	0	1	1	2	1	0	1
19	2020-09-23	1899-12-31 12:00:00	44	0	0	0	0	0	0	0	0	0	0	0	0	0	0	0	0	0	0	0	0	0	0	0	1	0	0	0	0	0	0	0	0	0	0	0	0	0	0	0	0	0	0	0	0	0	0
20	2020-09-25	1899-12-31 12:00:00	46	0	1	1	0	0	0	0	0	0	0	0	0	0	0	0	0	0	0	0	0	0	0	0	0	0	0	2	0	0	1	0	0	0	0	0	0	0	0	0	0	0	0	0	0	1	0
21	2020-09-28	1899-12-31 12:00:00	49	0	0	0	0	0	0	0	0	1	0	0	0	0	0	0	0	0	0	0	0	0	1	4	3	3	5	5	1	7	2	0	0	0	0	0	0	0	0	0	0	0	0	0	0	0	0
22	2020-09-30	1899-12-31 12:00:00	51	0	0	0	0	0	0	0	0	0	0	0	0	0	0	0	0	0	0	0	0	0	1	0	0	2	0	0	1	0	0	0	0	0	0	0	0	0	0	0	0	0	0	0	0	0	0
23	2020-10-02	1899-12-31 12:00:00	53	0	0	0	0	0	0	0	0	0	0	0	0	0	0	0	0	0	0	0	0	0	0	0	2	0	0	0	0	0	0	0	0	0	0	0	0	0	0	0	0	0	0	0	0	0	0
24	2020-10-05	1899-12-31 12:00:00	56	0	0	0	0	0	0	0	0	0	0	0	0	0	0	0	0	0	0	0	0	0	0	2	2	4	4	1	4	2	3	0	0	0	0	0	0	0	0	0	0	0	0	0	0	0	0
25	2020-10-07	1899-12-31 12:00:00	58	0	0	0	0	0	0	0	0	0	0	0	0	0	0	0	0	0	0	0	0	0	0	0	1	1	1	1	2	1	3	0	0	0	0	0	0	0	0	0	0	0	0	0	0	0	0
26	2020-10-09	1899-12-31 12:00:00	60	0	0	0	0	0	0	0	0	0	0	0	0	0	0	0	0	0	0	0	0	0	1	1	0	0	0	1	1	0	0	0	0	0	0	0	0	0	0	0	0	0	0	0	0	0	0
27	2020-10-12	1899-12-31 12:00:00	63	0	0	0	0	0	0	0	0	0	0	0	0	0	0	0	0	0	0	0	0	0	1	0	0	1	0	0	0	0	0	0	0	0	0	0	0	0	0	0	0	0	0	0	0	0	0
28	2020-10-14	1899-12-31 12:00:00	65	0	0	0	0	0	0	0	0	0	0	0	0	0	0	0	0	0	0	0	0	0	1	1	0	1	1	0	0	0	2	0	0	0	0	0	0	0	0	0	0	0	0	0	0	0	0
29	2020-10-16	1899-12-31 12:00:00	67	0	0	0	0	0	0	0	0	0	0	0	0	0	0	0	0	0	0	0	0	0	0	0	0	0	0	0	0	1	0	0	0	0	0	0	0	0	0	0	0	0	0	0	0	0	0
30	2020-10-19	1899-12-31 12:00:00	70	0	0	0	0	0	0	0	0	0	0	0	0	0	0	0	0	0	0	0	0	0	0	0	0	0	0	0	0	0	0	0	0	0	0	0	0	0	0	0	0	0	0	0	0	0	0
31	2020-10-21	1899-12-31 12:00:00	72	0	0	0	0	0	0	0	0	0	0	0	0	0	0	0	0	0	0	0	0	0	0	0	0	0	0	0	0	0	0	0	0	0	0	0	0	0	0	0	0	0	0	0	0	0	0
32	2000-01-01	1899-12-31 12:00:00	72	0	0	0	0	0	0	0	0	0	0	0	0	0	0	0	0	0	0	0	0	0	0	0	0	0	0	0	0	0	0	0	0	0	0	0	0	0	0	0	0	0	0	0	0	0	0
33	2000-01-01	1899-12-31 12:00:00	72	0	0	0	0	0	0	0	0	0	0	0	0	0	0	0	0	0	0	0	0	0	0	0	0	0	0	0	0	0	0	0	0	0	0	0	0	0	0	0	0	0	0	0	0	0	0
34	2000-01-01	1899-12-31 12:00:00	72	0	0	0	0	0	0	0	0	0	0	0	0	0	0	0	0	0	0	0	0	0	0	0	0	0	0	0	0	0	0	0	0	0	0	0	0	0	0	0	0	0	0	0	0	0	0
35	2000-01-01	1899-12-31 12:00:00	72	0	0	0	0	0	0	0	0	0	0	0	0	0	0	0	0	0	0	0	0	0	0	0	0	0	0	0	0	0	0	0	0	0	0	0	0	0	0	0	0	0	0	0	0	0	0
36	2000-01-01	1899-12-31 12:00:00	72	0	0	0	0	0	0	0	0	0	0	0	0	0	0	0	0	0	0	0	0	0	0	0	0	0	0	0	0	0	0	0	0	0	0	0	0	0	0	0	0	0	0	0	0	0	0
37	2000-01-01	1899-12-31 12:00:00	72	0	0	0	0	0	0	0	0	0	0	0	0	0	0	0	0	0	0	0	0	0	0	0	0	0	0	0	0	0	0	0	0	0	0	0	0	0	0	0	0	0	0	0	0	0	0
38	2000-01-01	1899-12-31 12:00:00	72	0	0	0	0	0	0	0	0	0	0	0	0	0	0	0	0	0	0	0	0	0	0	0	0	0	0	0	0	0	0	0	0	0	0	0	0	0	0	0	0	0	0	0	0	0	0
39	2000-01-01	1899-12-31 12:00:00	72	0	0	0	0	0	0	0	0	0	0	0	0	0	0	0	0	0	0	0	0	0	0	0	0	0	0	0	0	0	0	0	0	0	0	0	0	0	0	0	0	0	0	0	0	0	0
40	2000-01-01	1899-12-31 12:00:00	72	0	0	0	0	0	0	0	0	0	0	0	0	0	0	0	0	0	0	0	0	0	0	0	0	0	0	0	0	0	0	0	0	0	0	0	0	0	0	0	0	0	0	0	0	0	0
41	2000-01-01	1899-12-31 12:00:00	72	0	0	0	0	0	0	0	0	0	0	0	0	0	0	0	0	0	0	0	0	0	0	0	0	0	0	0	0	0	0	0	0	0	0	0	0	0	0	0	0	0	0	0	0	0	0
42	2000-01-01	1899-12-31 12:00:00	72	0	0	0	0	0	0	0	0	0	0	0	0	0	0	0	0	0	0	0	0	0	0	0	0	0	0	0	0	0	0	0	0	0	0	0	0	0	0	0	0	0	0	0	0	0	0
43	2000-01-01	1899-12-31 12:00:00	72	0	0	0	0	0	0	0	0	0	0	0	0	0	0	0	0	0	0	0	0	0	0	0	0	0	0	0	0	0	0	0	0	0	0	0	0	0	0	0	0	0	0	0	0	0	0
44	2000-01-01	1899-12-31 12:00:00	72	0	0	0	0	0	0	0	0	0	0	0	0	0	0	0	0	0	0	0	0	0	0	0	0	0	0	0	0	0	0	0	0	0	0	0	0	0	0	0	0	0	0	0	0	0	0
45	2000-01-01	1899-12-31 12:00:00	72	0	0	0	0	0	0	0	0	0	0	0	0	0	0	0	0	0	0	0	0	0	0	0	0	0	0	0	0	0	0	0	0	0	0	0	0	0	0	0	0	0	0	0	0	0	0
46	2000-01-01	1899-12-31 12:00:00	72	0	0	0	0	0	0	0	0	0	0	0	0	0	0	0	0	0	0	0	0	0	0	0	0	0	0	0	0	0	0	0	0	0	0	0	0	0	0	0	0	0	0	0	0	0	0
47	2000-01-01	1899-12-31 12:00:00	72	0	0	0	0	0	0	0	0	0	0	0	0	0	0	0	0	0	0	0	0	0	0	0	0	0	0	0	0	0	0	0	0	0	0	0	0	0	0	0	0	0	0	0	0	0	0
48	2000-01-01	1899-12-31 12:00:00	72	0	0	0	0	0	0	0	0	0	0	0	0	0	0	0	0	0	0	0	0	0	0	0	0	0	0	0	0	0	0	0	0	0	0	0	0	0	0	0	0	0	0	0	0	0	0
49	2000-01-01	1899-12-31 12:00:00	72	0	0	0	0	0	0	0	0	0	0	0	0	0	0	0	0	0	0	0	0	0	0	0	0	0	0	0	0	0	0	0	0	0	0	0	0	0	0	0	0	0	0	0	0	0	0
50	2000-01-01	1899-12-31 12:00:00	72	0	0	0	0	0	0	0	0	0	0	0	0	0	0	0	0	0	0	0	0	0	0	0	0	0	0	0	0	0	0	0	0	0	0	0	0	0	0	0	0	0	0	0	0	0	0
51	2000-01-01	1899-12-31 12:00:00	72	0	0	0	0	0	0	0	0	0	0	0	0	0	0	0	0	0	0	0	0	0	0	0	0	0	0	0	0	0	0	0	0	0	0	0	0	0	0	0	0	0	0	0	0	0	0
52	2000-01-01	1899-12-31 12:00:00	72	0	0	0	0	0	0	0	0	0	0	0	0	0	0	0	0	0	0	0	0	0	0	0	0	0	0	0	0	0	0	0	0	0	0	0	0	0	0	0	0	0	0	0	0	0	0
53	2000-01-01	1899-12-31 12:00:00	72	0	0	0	0	0	0	0	0	0	0	0	0	0	0	0	0	0	0	0	0	0	0	0	0	0	0	0	0	0	0	0	0	0	0	0	0	0	0	0	0	0	0	0	0	0	0
54	2000-01-01	1899-12-31 12:00:00	72	0	0	0	0	0	0	0	0	0	0	0	0	0	0	0	0	0	0	0	0	0	0	0	0	0	0	0	0	0	0	0	0	0	0	0	0	0	0	0	0	0	0	0	0	0	0
55	2000-01-01	1899-12-31 12:00:00	72	0	0	0	0	0	0	0	0	0	0	0	0	0	0	0	0	0	0	0	0	0	0	0	0	0	0	0	0	0	0	0	0	0	0	0	0	0	0	0	0	0	0	0	0	0	0
56	2000-01-01	1899-12-31 12:00:00	72	0	0	0	0	0	0	0	0	0	0	0	0	0	0	0	0	0	0	0	0	0	0	0	0	0	0	0	0	0	0	0	0	0	0	0	0	0	0	0	0	0	0	0	0	0	0
57	2000-01-01	1899-12-31 12:00:00	72	0	0	0	0	0	0	0	0	0	0	0	0	0	0	0	0	0	0	0	0	0	0	0	0	0	0	0	0	0	0	0	0	0	0	0	0	0	0	0	0	0	0	0	0	0	0
58	2000-01-01	1899-12-31 12:00:00	72	0	0	0	0	0	0	0	0	0	0	0	0	0	0	0	0	0	0	0	0	0	0	0	0	0	0	0	0	0	0	0	0	0	0	0	0	0	0	0	0	0	0	0	0	0	0
59	2000-01-01	1899-12-31 12:00:00	72	0	0	0	0	0	0	0	0	0	0	0	0	0	0	0	0	0	0	0	0	0	0	0	0	0	0	0	0	0	0	0	0	0	0	0	0	0	0	0	0	0	0	0	0	0	0
60	2000-01-01	1899-12-31 12:00:00	72	0	0	0	0	0	0	0	0	0	0	0	0	0	0	0	0	0	0	0	0	0	0	0	0	0	0	0	0	0	0	0	0	0	0	0	0	0	0	0	0	0	0	0	0	0	0
61	2000-01-01	1899-12-31 12:00:00	72	0	0	0	0	0	0	0	0	0	0	0	0	0	0	0	0	0	0	0	0	0	0	0	0	0	0	0	0	0	0	0	0	0	0	0	0	0	0	0	0	0	0	0	0	0	0
62	2000-01-01	1899-12-31 12:00:00	72	0	0	0	0	0	0	0	0	0	0	0	0	0	0	0	0	0	0	0	0	0	0	0	0	0	0	0	0	0	0	0	0	0	0	0	0	0	0	0	0	0	0	0	0	0	0
63	2000-01-01	1899-12-31 12:00:00	72	0	0	0	0	0	0	0	0	0	0	0	0	0	0	0	0	0	0	0	0	0	0	0	0	0	0	0	0	0	0	0	0	0	0	0	0	0	0	0	0	0	0	0	0	0	0
64	2000-01-01	1899-12-31 12:00:00	72	0	0	0	0	0	0	0	0	0	0	0	0	0	0	0	0	0	0	0	0	0	0	0	0	0	0	0	0	0	0	0	0	0	0	0	0	0	0	0	0	0	0	0	0	0	0
65	2000-01-01	1899-12-31 12:00:00	72	0	0	0	0	0	0	0	0	0	0	0	0	0	0	0	0	0	0	0	0	0	0	0	0	0	0	0	0	0	0	0	0	0	0	0	0	0	0	0	0	0	0	0	0	0	0
66	2000-01-01	1899-12-31 12:00:00	72	0	0	0	0	0	0	0	0	0	0	0	0	0	0	0	0	0	0	0	0	0	0	0	0	0	0	0	0	0	0	0	0	0	0	0	0	0	0	0	0	0	0	0	0	0	0
67	2000-01-01	1899-12-31 12:00:00	72	0	0	0	0	0	0	0	0	0	0	0	0	0	0	0	0	0	0	0	0	0	0	0	0	0	0	0	0	0	0	0	0	0	0	0	0	0	0	0	0	0	0	0	0	0	0
68	2000-01-01	1899-12-31 12:00:00	72	0	0	0	0	0	0	0	0	0	0	0	0	0	0	0	0	0	0	0	0	0	0	0	0	0	0	0	0	0	0	0	0	0	0	0	0	0	0	0	0	0	0	0	0	0	0
69	2000-01-01	1899-12-31 12:00:00	72	0	0	0	0	0	0	0	0	0	0	0	0	0	0	0	0	0	0	0	0	0	0	0	0	0	0	0	0	0	0	0	0	0	0	0	0	0	0	0	0	0	0	0	0	0	0
70	2000-01-01	1899-12-31 12:00:00	72	0	0	0	0	0	0	0	0	0	0	0	0	0	0	0	0	0	0	0	0	0	0	0	0	0	0	0	0	0	0	0	0	0	0	0	0	0	0	0	0	0	0	0	0	0	0
71	2000-01-01	1899-12-31 12:00:00	72	0	0	0	0	0	0	0	0	0	0	0	0	0	0	0	0	0	0	0	0	0	0	0	0	0	0	0	0	0	0	0	0	0	0	0	0	0	0	0	0	0	0	0	0	0	0
72	2000-01-01	1899-12-31 12:00:00	72	0	0	0	0	0	0	0	0	0	0	0	0	0	0	0	0	0	0	0	0	0	0	0	0	0	0	0	0	0	0	0	0	0	0	0	0	0	0	0	0	0	0	0	0	0	0
73	2000-01-01	1899-12-31 12:00:00	72	0	0	0	0	0	0	0	0	0	0	0	0	0	0	0	0	0	0	0	0	0	0	0	0	0	0	0	0	0	0	0	0	0	0	0	0	0	0	0	0	0	0	0	0	0	0
74	2000-01-01	1899-12-31 12:00:00	72	0	0	0	0	0	0	0	0	0	0	0	0	0	0	0	0	0	0	0	0	0	0	0	0	0	0	0	0	0	0	0	0	0	0	0	0	0	0	0	0	0	0	0	0	0	0
75	2000-01-01	1899-12-31 12:00:00	72	0	0	0	0	0	0	0	0	0	0	0	0	0	0	0	0	0	0	0	0	0	0	0	0	0	0	0	0	0	0	0	0	0	0	0	0	0	0	0	0	0	0	0	0	0	0
				9	12	16	18	10	13	12	10	15	11	0	0	0	0	0	0	0	0	0	0	17	12	14	14	15	12	13	10	13	13	0	0	0	0	0	0	0	0	0	0	9	14	11	11	14	12
		censors
				1	2	3	4	5	6	7	8	9	10	11	12	13	14	15	16	17	18	19	20	21	22	23	24	25	26	27	28	29	30	31	32	33	34	35	36	37	38	39	40	41	42	43	44	45	46
1	2020-08-12	1899-12-31 12:00:00	2	1	0	0	0	2	1	0	3	2	1	0	0	0	0	0	0	0	0	0	0	0	0	0	0	0	0	1	0	0	0	0	0	0	0	0	0	0	0	0	0	0	1	2	1	0	0
2	2020-08-14	1899-12-31 12:00:00	4	0	0	0	0	0	0	0	0	0	0	0	0	0	0	0	0	0	0	0	0	0	0	0	0	0	0	0	0	0	0	0	0	0	0	0	0	0	0	0	0	0	0	0	0	0	0
3	2020-08-17	1899-12-31 12:00:00	7	0	0	0	0	0	0	0	0	0	0	0	0	0	0	0	0	0	0	0	0	0	0	0	0	0	0	0	0	0	0	0	0	0	0	0	0	0	0	0	0	0	0	0	0	0	0
4	2020-08-19	1899-12-31 12:00:00	9	0	2	1	0	1	1	1	0	2	2	0	0	0	0	0	0	0	0	0	0	0	0	0	0	0	0	0	0	0	0	0	0	0	0	0	0	0	0	0	0	0	0	0	0	0	0
5	2020-08-21	1899-12-31 12:00:00	11	0	0	0	0	0	0	0	0	0	0	0	0	0	0	0	0	0	0	0	0	0	0	0	0	0	0	0	0	0	0	0	0	0	0	0	0	0	0	0	0	0	0	0	1	2	0
6	2020-08-24	1899-12-31 12:00:00	14	0	0	1	0	0	0	0	0	0	0	0	0	0	0	0	0	0	0	0	0	0	0	0	0	0	0	0	0	0	0	0	0	0	0	0	0	0	0	0	0	0	0	0	0	0	0
7	2020-08-26	1899-12-31 12:00:00	16	0	0	0	0	0	0	0	0	0	0	0	0	0	0	0	0	0	0	0	0	0	0	0	0	0	0	0	0	0	0	0	0	0	0	0	0	0	0	0	0	0	0	0	0	0	0
8	2020-08-28	1899-12-31 12:00:00	18	1	1	0	0	2	0	0	0	0	1	0	0	0	0	0	0	0	0	0	0	0	0	0	0	0	0	0	0	0	0	0	0	0	0	0	0	0	0	0	0	0	0	0	0	0	0
9	2020-08-31	1899-12-31 12:00:00	21	2	1	0	0	0	0	0	1	0	0	0	0	0	0	0	0	0	0	0	0	0	2	0	0	0	0	0	0	0	0	0	0	0	0	0	0	0	0	0	0	1	0	0	0	0	0
10	2020-09-02	1899-12-31 12:00:00	23	0	0	0	0	0	0	0	0	0	1	0	0	0	0	0	0	0	0	0	0	0	0	0	0	0	0	0	0	0	0	0	0	0	0	0	0	0	0	0	0	0	0	0	0	0	0
11	2020-09-04	1899-12-31 12:00:00	25	0	0	0	0	0	0	0	0	0	0	0	0	0	0	0	0	0	0	0	0	0	0	0	0	0	0	0	0	0	0	0	0	0	0	0	0	0	0	0	0	0	0	0	0	0	0
12	2020-09-07	1899-12-31 12:00:00	28	0	0	0	0	0	0	0	0	0	0	0	0	0	0	0	0	0	0	0	0	0	0	1	0	0	0	0	0	0	0	0	0	0	0	0	0	0	0	0	0	0	0	0	0	0	0
13	2020-09-09	1899-12-31 12:00:00	30	0	0	0	0	0	0	0	0	0	0	0	0	0	0	0	0	0	0	0	0	0	0	0	0	0	0	0	0	0	0	0	0	0	0	0	0	0	0	0	0	0	0	0	0	0	0
14	2020-09-12	1899-12-31 12:00:00	33	0	0	0	0	0	0	0	0	0	0	0	0	0	0	0	0	0	0	0	0	0	0	0	0	0	0	0	0	0	0	0	0	0	0	0	0	0	0	0	0	0	0	0	0	0	0
15	2020-09-13	1899-12-31 12:00:00	34	0	0	0	0	0	0	0	0	0	0	0	0	0	0	0	0	0	0	0	0	0	0	0	0	0	0	0	0	0	0	0	0	0	0	0	0	0	0	0	0	0	0	0	0	0	0
16	2020-09-16	1899-12-31 12:00:00	37	0	0	0	0	0	0	0	0	0	0	0	0	0	0	0	0	0	0	0	0	0	0	0	0	0	0	0	0	0	0	0	0	0	0	0	0	0	0	0	0	0	0	0	0	0	0
17	2020-09-18	1899-12-31 12:00:00	39	0	0	0	0	0	0	0	0	0	0	0	0	0	0	0	0	0	0	0	0	0	0	0	0	0	0	0	0	0	0	0	0	0	0	0	0	0	0	0	0	0	0	0	0	0	0
18	2020-09-21	1899-12-31 12:00:00	42	0	0	0	0	0	0	0	0	0	0	0	0	0	0	0	0	0	0	0	0	0	0	0	0	0	0	0	0	0	0	0	0	0	0	0	0	0	0	0	0	0	0	0	0	0	0
19	2020-09-23	1899-12-31 12:00:00	44	0	0	0	0	0	0	0	0	0	0	0	0	0	0	0	0	0	0	0	0	0	0	0	0	0	0	0	0	0	0	0	0	0	0	0	0	0	0	0	0	0	0	0	0	0	0
20	2020-09-25	1899-12-31 12:00:00	46	0	0	0	0	0	0	0	0	0	0	0	0	0	0	0	0	0	0	0	0	0	0	0	0	0	0	0	0	0	0	0	0	0	0	0	0	0	0	0	0	0	0	0	0	0	0
21	2020-09-28	1899-12-31 12:00:00	49	0	0	0	0	0	0	0	0	0	0	0	0	0	0	0	0	0	0	0	0	0	0	0	0	0	0	0	1	0	0	0	0	0	0	0	0	0	0	0	0	0	0	0	0	0	0
22	2020-09-30	1899-12-31 12:00:00	51	0	0	0	0	0	0	0	0	0	0	0	0	0	0	0	0	0	0	0	0	0	0	0	0	0	0	0	0	0	0	0	0	0	0	0	0	0	0	0	0	0	0	0	0	0	0
23	2020-10-02	1899-12-31 12:00:00	53	0	0	0	0	0	0	0	0	0	0	0	0	0	0	0	0	0	0	0	0	0	0	0	0	0	0	0	0	0	0	0	0	0	0	0	0	0	0	0	0	0	0	0	0	0	0
24	2020-10-05	1899-12-31 12:00:00	56	0	0	0	0	0	0	0	0	0	0	0	0	0	0	0	0	0	0	0	0	0	0	0	0	0	0	0	0	0	0	0	0	0	0	0	0	0	0	0	0	0	0	0	0	0	0
25	2020-10-07	1899-12-31 12:00:00	58	0	0	0	0	0	0	0	0	0	0	0	0	0	0	0	0	0	0	0	0	0	0	0	0	0	0	0	2	0	0	0	0	0	0	0	0	0	0	0	0	0	0	0	0	0	0
26	2020-10-09	1899-12-31 12:00:00	60	0	0	0	0	0	0	0	0	0	0	0	0	0	0	0	0	0	0	0	0	0	0	0	0	0	0	0	0	0	0	0	0	0	0	0	0	0	0	0	0	0	0	0	0	0	0
27	2020-10-12	1899-12-31 12:00:00	63	0	0	0	0	0	0	0	0	0	0	0	0	0	0	0	0	0	0	0	0	0	0	0	0	0	0	0	0	0	0	0	0	0	0	0	0	0	0	0	0	0	0	0	0	0	0
28	2020-10-14	1899-12-31 12:00:00	65	0	0	0	0	0	0	0	0	0	0	0	0	0	0	0	0	0	0	0	0	0	0	0	0	0	0	0	0	0	0	0	0	0	0	0	0	0	0	0	0	0	0	0	0	0	0
29	2020-10-16	1899-12-31 12:00:00	67	0	0	0	0	0	0	0	0	0	0	0	0	0	0	0	0	0	0	0	0	0	0	0	0	0	0	0	0	0	0	0	0	0	0	0	0	0	0	0	0	0	0	0	0	0	0
30	2020-10-19	1899-12-31 12:00:00	70	0	0	0	0	0	0	0	0	0	0	0	0	0	0	0	0	0	0	0	0	0	0	0	0	0	0	0	0	0	0	0	0	0	0	0	0	0	0	0	0	0	0	0	0	0	0
31	2020-10-21	1899-12-31 12:00:00	72	0	0	0	0	0	0	0	0	0	0	0	0	0	0	0	0	0	0	0	0	0	0	0	0	0	0	0	0	0	0	0	0	0	0	0	0	0	0	0	0	0	0	0	0	0	0
32	2000-01-01	1899-12-31 12:00:00	72	0	0	0	0	0	0	0	0	0	0	0	0	0	0	0	0	0	0	0	0	0	0	0	0	0	0	0	0	0	0	0	0	0	0	0	0	0	0	0	0	0	0	0	0	0	0
33	2000-01-01	1899-12-31 12:00:00	72	0	0	0	0	0	0	0	0	0	0	0	0	0	0	0	0	0	0	0	0	0	0	0	0	0	0	0	0	0	0	0	0	0	0	0	0	0	0	0	0	0	0	0	0	0	0
34	2000-01-01	1899-12-31 12:00:00	72	0	0	0	0	0	0	0	0	0	0	0	0	0	0	0	0	0	0	0	0	0	0	0	0	0	0	0	0	0	0	0	0	0	0	0	0	0	0	0	0	0	0	0	0	0	0
35	2000-01-01	1899-12-31 12:00:00	72	0	0	0	0	0	0	0	0	0	0	0	0	0	0	0	0	0	0	0	0	0	0	0	0	0	0	0	0	0	0	0	0	0	0	0	0	0	0	0	0	0	0	0	0	0	0
36	2000-01-01	1899-12-31 12:00:00	72	0	0	0	0	0	0	0	0	0	0	0	0	0	0	0	0	0	0	0	0	0	0	0	0	0	0	0	0	0	0	0	0	0	0	0	0	0	0	0	0	0	0	0	0	0	0
37	2000-01-01	1899-12-31 12:00:00	72	0	0	0	0	0	0	0	0	0	0	0	0	0	0	0	0	0	0	0	0	0	0	0	0	0	0	0	0	0	0	0	0	0	0	0	0	0	0	0	0	0	0	0	0	0	0
38	2000-01-01	1899-12-31 12:00:00	72	0	0	0	0	0	0	0	0	0	0	0	0	0	0	0	0	0	0	0	0	0	0	0	0	0	0	0	0	0	0	0	0	0	0	0	0	0	0	0	0	0	0	0	0	0	0
39	2000-01-01	1899-12-31 12:00:00	72	0	0	0	0	0	0	0	0	0	0	0	0	0	0	0	0	0	0	0	0	0	0	0	0	0	0	0	0	0	0	0	0	0	0	0	0	0	0	0	0	0	0	0	0	0	0
40	2000-01-01	1899-12-31 12:00:00	72	0	0	0	0	0	0	0	0	0	0	0	0	0	0	0	0	0	0	0	0	0	0	0	0	0	0	0	0	0	0	0	0	0	0	0	0	0	0	0	0	0	0	0	0	0	0
41	2000-01-01	1899-12-31 12:00:00	72	0	0	0	0	0	0	0	0	0	0	0	0	0	0	0	0	0	0	0	0	0	0	0	0	0	0	0	0	0	0	0	0	0	0	0	0	0	0	0	0	0	0	0	0	0	0
42	2000-01-01	1899-12-31 12:00:00	72	0	0	0	0	0	0	0	0	0	0	0	0	0	0	0	0	0	0	0	0	0	0	0	0	0	0	0	0	0	0	0	0	0	0	0	0	0	0	0	0	0	0	0	0	0	0
43	2000-01-01	1899-12-31 12:00:00	72	0	0	0	0	0	0	0	0	0	0	0	0	0	0	0	0	0	0	0	0	0	0	0	0	0	0	0	0	0	0	0	0	0	0	0	0	0	0	0	0	0	0	0	0	0	0
44	2000-01-01	1899-12-31 12:00:00	72	0	0	0	0	0	0	0	0	0	0	0	0	0	0	0	0	0	0	0	0	0	0	0	0	0	0	0	0	0	0	0	0	0	0	0	0	0	0	0	0	0	0	0	0	0	0
45	2000-01-01	1899-12-31 12:00:00	72	0	0	0	0	0	0	0	0	0	0	0	0	0	0	0	0	0	0	0	0	0	0	0	0	0	0	0	0	0	0	0	0	0	0	0	0	0	0	0	0	0	0	0	0	0	0
46	2000-01-01	1899-12-31 12:00:00	72	0	0	0	0	0	0	0	0	0	0	0	0	0	0	0	0	0	0	0	0	0	0	0	0	0	0	0	0	0	0	0	0	0	0	0	0	0	0	0	0	0	0	0	0	0	0
47	2000-01-01	1899-12-31 12:00:00	72	0	0	0	0	0	0	0	0	0	0	0	0	0	0	0	0	0	0	0	0	0	0	0	0	0	0	0	0	0	0	0	0	0	0	0	0	0	0	0	0	0	0	0	0	0	0
48	2000-01-01	1899-12-31 12:00:00	72	0	0	0	0	0	0	0	0	0	0	0	0	0	0	0	0	0	0	0	0	0	0	0	0	0	0	0	0	0	0	0	0	0	0	0	0	0	0	0	0	0	0	0	0	0	0
49	2000-01-01	1899-12-31 12:00:00	72	0	0	0	0	0	0	0	0	0	0	0	0	0	0	0	0	0	0	0	0	0	0	0	0	0	0	0	0	0	0	0	0	0	0	0	0	0	0	0	0	0	0	0	0	0	0
50	2000-01-01	1899-12-31 12:00:00	72	0	0	0	0	0	0	0	0	0	0	0	0	0	0	0	0	0	0	0	0	0	0	0	0	0	0	0	0	0	0	0	0	0	0	0	0	0	0	0	0	0	0	0	0	0	0
51	2000-01-01	1899-12-31 12:00:00	72	0	0	0	0	0	0	0	0	0	0	0	0	0	0	0	0	0	0	0	0	0	0	0	0	0	0	0	0	0	0	0	0	0	0	0	0	0	0	0	0	0	0	0	0	0	0
52	2000-01-01	1899-12-31 12:00:00	72	0	0	0	0	0	0	0	0	0	0	0	0	0	0	0	0	0	0	0	0	0	0	0	0	0	0	0	0	0	0	0	0	0	0	0	0	0	0	0	0	0	0	0	0	0	0
53	2000-01-01	1899-12-31 12:00:00	72	0	0	0	0	0	0	0	0	0	0	0	0	0	0	0	0	0	0	0	0	0	0	0	0	0	0	0	0	0	0	0	0	0	0	0	0	0	0	0	0	0	0	0	0	0	0
54	2000-01-01	1899-12-31 12:00:00	72	0	0	0	0	0	0	0	0	0	0	0	0	0	0	0	0	0	0	0	0	0	0	0	0	0	0	0	0	0	0	0	0	0	0	0	0	0	0	0	0	0	0	0	0	0	0
55	2000-01-01	1899-12-31 12:00:00	72	0	0	0	0	0	0	0	0	0	0	0	0	0	0	0	0	0	0	0	0	0	0	0	0	0	0	0	0	0	0	0	0	0	0	0	0	0	0	0	0	0	0	0	0	0	0
56	2000-01-01	1899-12-31 12:00:00	72	0	0	0	0	0	0	0	0	0	0	0	0	0	0	0	0	0	0	0	0	0	0	0	0	0	0	0	0	0	0	0	0	0	0	0	0	0	0	0	0	0	0	0	0	0	0
57	2000-01-01	1899-12-31 12:00:00	72	0	0	0	0	0	0	0	0	0	0	0	0	0	0	0	0	0	0	0	0	0	0	0	0	0	0	0	0	0	0	0	0	0	0	0	0	0	0	0	0	0	0	0	0	0	0
58	2000-01-01	1899-12-31 12:00:00	72	0	0	0	0	0	0	0	0	0	0	0	0	0	0	0	0	0	0	0	0	0	0	0	0	0	0	0	0	0	0	0	0	0	0	0	0	0	0	0	0	0	0	0	0	0	0
59	2000-01-01	1899-12-31 12:00:00	72	0	0	0	0	0	0	0	0	0	0	0	0	0	0	0	0	0	0	0	0	0	0	0	0	0	0	0	0	0	0	0	0	0	0	0	0	0	0	0	0	0	0	0	0	0	0
60	2000-01-01	1899-12-31 12:00:00	72	0	0	0	0	0	0	0	0	0	0	0	0	0	0	0	0	0	0	0	0	0	0	0	0	0	0	0	0	0	0	0	0	0	0	0	0	0	0	0	0	0	0	0	0	0	0
61	2000-01-01	1899-12-31 12:00:00	72	0	0	0	0	0	0	0	0	0	0	0	0	0	0	0	0	0	0	0	0	0	0	0	0	0	0	0	0	0	0	0	0	0	0	0	0	0	0	0	0	0	0	0	0	0	0
62	2000-01-01	1899-12-31 12:00:00	72	0	0	0	0	0	0	0	0	0	0	0	0	0	0	0	0	0	0	0	0	0	0	0	0	0	0	0	0	0	0	0	0	0	0	0	0	0	0	0	0	0	0	0	0	0	0
63	2000-01-01	1899-12-31 12:00:00	72	0	0	0	0	0	0	0	0	0	0	0	0	0	0	0	0	0	0	0	0	0	0	0	0	0	0	0	0	0	0	0	0	0	0	0	0	0	0	0	0	0	0	0	0	0	0
64	2000-01-01	1899-12-31 12:00:00	72	0	0	0	0	0	0	0	0	0	0	0	0	0	0	0	0	0	0	0	0	0	0	0	0	0	0	0	0	0	0	0	0	0	0	0	0	0	0	0	0	0	0	0	0	0	0
65	2000-01-01	1899-12-31 12:00:00	72	0	0	0	0	0	0	0	0	0	0	0	0	0	0	0	0	0	0	0	0	0	0	0	0	0	0	0	0	0	0	0	0	0	0	0	0	0	0	0	0	0	0	0	0	0	0
66	2000-01-01	1899-12-31 12:00:00	72	0	0	0	0	0	0	0	0	0	0	0	0	0	0	0	0	0	0	0	0	0	0	0	0	0	0	0	0	0	0	0	0	0	0	0	0	0	0	0	0	0	0	0	0	0	0
67	2000-01-01	1899-12-31 12:00:00	72	0	0	0	0	0	0	0	0	0	0	0	0	0	0	0	0	0	0	0	0	0	0	0	0	0	0	0	0	0	0	0	0	0	0	0	0	0	0	0	0	0	0	0	0	0	0
68	2000-01-01	1899-12-31 12:00:00	72	0	0	0	0	0	0	0	0	0	0	0	0	0	0	0	0	0	0	0	0	0	0	0	0	0	0	0	0	0	0	0	0	0	0	0	0	0	0	0	0	0	0	0	0	0	0
69	2000-01-01	1899-12-31 12:00:00	72	0	0	0	0	0	0	0	0	0	0	0	0	0	0	0	0	0	0	0	0	0	0	0	0	0	0	0	0	0	0	0	0	0	0	0	0	0	0	0	0	0	0	0	0	0	0
70	2000-01-01	1899-12-31 12:00:00	72	0	0	0	0	0	0	0	0	0	0	0	0	0	0	0	0	0	0	0	0	0	0	0	0	0	0	0	0	0	0	0	0	0	0	0	0	0	0	0	0	0	0	0	0	0	0
71	2000-01-01	1899-12-31 12:00:00	72	0	0	0	0	0	0	0	0	0	0	0	0	0	0	0	0	0	0	0	0	0	0	0	0	0	0	0	0	0	0	0	0	0	0	0	0	0	0	0	0	0	0	0	0	0	0
72	2000-01-01	1899-12-31 12:00:00	72	0	0	0	0	0	0	0	0	0	0	0	0	0	0	0	0	0	0	0	0	0	0	0	0	0	0	0	0	0	0	0	0	0	0	0	0	0	0	0	0	0	0	0	0	0	0
73	2000-01-01	1899-12-31 12:00:00	72	0	0	0	0	0	0	0	0	0	0	0	0	0	0	0	0	0	0	0	0	0	0	0	0	0	0	0	0	0	0	0	0	0	0	0	0	0	0	0	0	0	0	0	0	0	0
74	2000-01-01	1899-12-31 12:00:00	72	0	0	0	0	0	0	0	0	0	0	0	0	0	0	0	0	0	0	0	0	0	0	0	0	0	0	0	0	0	0	0	0	0	0	0	0	0	0	0	0	0	0	0	0	0	0
75	2000-01-01	1899-12-31 12:00:00	72	0	0	0	0	0	0	0	0	0	0	0	0	0	0	0	0	0	0	0	0	0	0	0	0	0	0	0	0	0	0	0	0	0	0	0	0	0	0	0	0	0	0	0	0	0	0
				4	4	2	0	5	2	1	4	4	5	0	0	0	0	0	0	0	0	0	0	0	2	1	0	0	0	1	3	0	0	0	0	0	0	0	0	0	0	0	0	1	1	2	2	2	0
[truncated: 154 more columns]

## Sheet: Nx per bottle
			deaths
				bottle number
	date	time	day	1	2	3	4	5	6	7	8	9	10	11	12	13	14	15	16	17	18	19	20	21	22	23	24	25	26	27	28	29	30	31	32	33	34	35	36	37	38	39	40	41	42	43	44	45	46
0	2020-08-10	1899-12-31 12:00:00	0	15	15	15	15	15	15	15	15	15	15	15	15	15	15	15	15	15	15	15	15	15	15	15	15	15	15	15	15	15	15	15	15	15	15	15	15	15	15	15	15	15	15	15	15	15	15
1	2020-08-12	1899-12-31 12:00:00	2	14	15	15	15	13	14	15	12	13	14	15	15	15	15	15	15	15	15	15	15	15	15	15	15	15	15	14	15	15	15	15	15	15	15	15	15	15	15	15	15	15	14	13	14	15	15
2	2020-08-14	1899-12-31 12:00:00	4	14	15	15	15	13	14	15	12	13	14	15	15	15	15	15	15	15	15	15	15	15	15	15	15	15	15	14	15	15	15	15	15	15	15	15	15	15	15	15	15	15	14	13	14	15	15
3	2020-08-17	1899-12-31 12:00:00	7	14	15	15	13	13	14	15	12	13	13	15	15	15	15	15	15	15	15	15	15	15	15	15	15	15	15	14	15	15	15	15	15	15	15	15	15	15	15	15	15	15	14	13	14	15	14
4	2020-08-19	1899-12-31 12:00:00	9	14	13	14	13	12	13	14	12	11	11	15	15	15	15	15	15	15	15	15	15	15	15	15	15	15	15	14	15	15	15	15	15	15	15	15	15	15	15	15	15	15	14	13	14	15	14
5	2020-08-21	1899-12-31 12:00:00	11	14	11	12	13	11	13	14	12	11	10	15	15	15	15	15	15	15	15	15	15	15	15	15	15	15	15	14	15	15	14	15	15	15	15	15	15	15	15	15	15	14	14	13	11	13	12
6	2020-08-24	1899-12-31 12:00:00	14	14	11	10	13	8	12	13	12	9	10	15	15	15	15	15	15	15	15	15	15	15	15	15	15	15	15	13	15	15	14	15	15	15	15	15	15	15	15	15	15	14	14	13	11	12	12
7	2020-08-26	1899-12-31 12:00:00	16	14	11	9	12	8	9	12	12	9	10	15	15	15	15	15	15	15	15	15	15	15	14	15	15	15	15	13	15	14	14	15	15	15	15	15	15	15	15	15	15	14	14	13	11	12	12
8	2020-08-28	1899-12-31 12:00:00	18	13	10	9	11	5	9	9	12	8	9	15	15	15	15	15	15	15	15	15	15	10	12	15	15	15	15	13	15	14	14	15	15	15	15	15	15	15	15	15	15	14	14	13	11	12	12
9	2020-08-31	1899-12-31 12:00:00	21	7	6	3	5	4	7	4	6	6	6	15	15	15	15	15	15	15	15	15	15	2	9	14	14	13	14	11	15	14	13	15	15	15	15	15	15	15	15	15	15	9	10	8	9	10	8
10	2020-09-02	1899-12-31 12:00:00	23	5	5	-1	1	3	5	4	5	2	3	15	15	15	15	15	15	15	15	15	15	1	8	13	14	12	14	11	14	14	13	15	15	15	15	15	15	15	15	15	15	7	9	7	8	8	6
11	2020-09-04	1899-12-31 12:00:00	25	3	4	-1	1	3	2	4	3	1	3	15	15	15	15	15	15	15	15	15	15	1	8	13	12	12	14	11	14	14	13	15	15	15	15	15	15	15	15	15	15	7	7	6	8	7	5
12	2020-09-07	1899-12-31 12:00:00	28	3	3	-1	-1	2	1	4	2	-2	1	15	15	15	15	15	15	15	15	15	15	0	7	12	11	12	14	11	14	14	13	15	15	15	15	15	15	15	15	15	15	6	5	6	7	7	5
13	2020-09-09	1899-12-31 12:00:00	30	3	1	-1	-1	2	0	4	2	-2	1	15	15	15	15	15	15	15	15	15	15	0	7	10	11	12	14	11	14	14	13	15	15	15	15	15	15	15	15	15	15	6	4	6	6	5	5
14	2020-09-12	1899-12-31 12:00:00	33	2	1	-1	-2	1	0	4	2	-2	0	15	15	15	15	15	15	15	15	15	15	-1	6	9	11	12	14	11	14	13	13	15	15	15	15	15	15	15	15	15	15	6	2	4	4	0	4
15	2020-09-13	1899-12-31 12:00:00	34	2	1	-1	-3	1	0	3	1	-2	-1	15	15	15	15	15	15	15	15	15	15	-1	6	8	11	12	14	11	14	13	13	15	15	15	15	15	15	15	15	15	15	6	1	4	3	0	4
16	2020-09-16	1899-12-31 12:00:00	37	2	1	-2	-3	0	0	3	1	-2	-1	15	15	15	15	15	15	15	15	15	15	-2	6	8	11	12	14	11	14	13	13	15	15	15	15	15	15	15	15	15	15	6	1	4	3	0	4
17	2020-09-18	1899-12-31 12:00:00	39	2	1	-2	-3	0	0	3	1	-2	-1	15	15	15	15	15	15	15	15	15	15	-2	6	8	10	12	14	11	14	13	13	15	15	15	15	15	15	15	15	15	15	6	1	4	3	0	4
18	2020-09-21	1899-12-31 12:00:00	42	2	0	-2	-3	0	0	2	1	-3	-1	15	15	15	15	15	15	15	15	15	15	-2	6	8	10	12	14	11	14	13	13	15	15	15	15	15	15	15	15	15	15	5	0	2	2	0	3
19	2020-09-23	1899-12-31 12:00:00	44	2	0	-2	-3	0	0	2	1	-3	-1	15	15	15	15	15	15	15	15	15	15	-2	6	8	9	12	14	11	14	13	13	15	15	15	15	15	15	15	15	15	15	5	0	2	2	0	3
20	2020-09-25	1899-12-31 12:00:00	46	2	-1	-3	-3	0	0	2	1	-3	-1	15	15	15	15	15	15	15	15	15	15	-2	6	8	9	12	14	9	14	13	12	15	15	15	15	15	15	15	15	15	15	5	0	2	2	-1	3
21	2020-09-28	1899-12-31 12:00:00	49	2	-1	-3	-3	0	0	2	1	-4	-1	15	15	15	15	15	15	15	15	15	15	-2	5	4	6	9	9	4	12	6	10	15	15	15	15	15	15	15	15	15	15	5	0	2	2	-1	3
22	2020-09-30	1899-12-31 12:00:00	51	2	-1	-3	-3	0	0	2	1	-4	-1	15	15	15	15	15	15	15	15	15	15	-2	4	4	6	7	9	4	11	6	10	15	15	15	15	15	15	15	15	15	15	5	0	2	2	-1	3
23	2020-10-02	1899-12-31 12:00:00	53	2	-1	-3	-3	0	0	2	1	-4	-1	15	15	15	15	15	15	15	15	15	15	-2	4	4	4	7	9	4	11	6	10	15	15	15	15	15	15	15	15	15	15	5	0	2	2	-1	3
24	2020-10-05	1899-12-31 12:00:00	56	2	-1	-3	-3	0	0	2	1	-4	-1	15	15	15	15	15	15	15	15	15	15	-2	4	2	2	3	5	3	7	4	7	15	15	15	15	15	15	15	15	15	15	5	0	2	2	-1	3
25	2020-10-07	1899-12-31 12:00:00	58	2	-1	-3	-3	0	0	2	1	-4	-1	15	15	15	15	15	15	15	15	15	15	-2	4	2	1	2	4	2	3	3	4	15	15	15	15	15	15	15	15	15	15	5	0	2	2	-1	3
26	2020-10-09	1899-12-31 12:00:00	60	2	-1	-3	-3	0	0	2	1	-4	-1	15	15	15	15	15	15	15	15	15	15	-2	3	1	1	2	4	1	2	3	4	15	15	15	15	15	15	15	15	15	15	5	0	2	2	-1	3
27	2020-10-12	1899-12-31 12:00:00	63	2	-1	-3	-3	0	0	2	1	-4	-1	15	15	15	15	15	15	15	15	15	15	-2	2	1	1	1	4	1	2	3	4	15	15	15	15	15	15	15	15	15	15	5	0	2	2	-1	3
28	2020-10-14	1899-12-31 12:00:00	65	2	-1	-3	-3	0	0	2	1	-4	-1	15	15	15	15	15	15	15	15	15	15	-2	1	0	1	0	3	1	2	3	2	15	15	15	15	15	15	15	15	15	15	5	0	2	2	-1	3
29	2020-10-16	1899-12-31 12:00:00	67	2	-1	-3	-3	0	0	2	1	-4	-1	15	15	15	15	15	15	15	15	15	15	-2	1	0	1	0	3	1	2	2	2	15	15	15	15	15	15	15	15	15	15	5	0	2	2	-1	3
30	2020-10-19	1899-12-31 12:00:00	70	2	-1	-3	-3	0	0	2	1	-4	-1	15	15	15	15	15	15	15	15	15	15	-2	1	0	1	0	3	1	2	2	2	15	15	15	15	15	15	15	15	15	15	5	0	2	2	-1	3
31	2020-10-21	1899-12-31 12:00:00	72	2	-1	-3	-3	0	0	2	1	-4	-1	15	15	15	15	15	15	15	15	15	15	-2	1	0	1	0	3	1	2	2	2	15	15	15	15	15	15	15	15	15	15	5	0	2	2	-1	3
32	2000-01-01	1899-12-31 12:00:00	72	2	-1	-3	-3	0	0	2	1	-4	-1	15	15	15	15	15	15	15	15	15	15	-2	1	0	1	0	3	1	2	2	2	15	15	15	15	15	15	15	15	15	15	5	0	2	2	-1	3
33	2000-01-01	1899-12-31 12:00:00	72	2	-1	-3	-3	0	0	2	1	-4	-1	15	15	15	15	15	15	15	15	15	15	-2	1	0	1	0	3	1	2	2	2	15	15	15	15	15	15	15	15	15	15	5	0	2	2	-1	3
34	2000-01-01	1899-12-31 12:00:00	72	2	-1	-3	-3	0	0	2	1	-4	-1	15	15	15	15	15	15	15	15	15	15	-2	1	0	1	0	3	1	2	2	2	15	15	15	15	15	15	15	15	15	15	5	0	2	2	-1	3
35	2000-01-01	1899-12-31 12:00:00	72	2	-1	-3	-3	0	0	2	1	-4	-1	15	15	15	15	15	15	15	15	15	15	-2	1	0	1	0	3	1	2	2	2	15	15	15	15	15	15	15	15	15	15	5	0	2	2	-1	3
36	2000-01-01	1899-12-31 12:00:00	72	2	-1	-3	-3	0	0	2	1	-4	-1	15	15	15	15	15	15	15	15	15	15	-2	1	0	1	0	3	1	2	2	2	15	15	15	15	15	15	15	15	15	15	5	0	2	2	-1	3
37	2000-01-01	1899-12-31 12:00:00	72	2	-1	-3	-3	0	0	2	1	-4	-1	15	15	15	15	15	15	15	15	15	15	-2	1	0	1	0	3	1	2	2	2	15	15	15	15	15	15	15	15	15	15	5	0	2	2	-1	3
38	2000-01-01	1899-12-31 12:00:00	72	2	-1	-3	-3	0	0	2	1	-4	-1	15	15	15	15	15	15	15	15	15	15	-2	1	0	1	0	3	1	2	2	2	15	15	15	15	15	15	15	15	15	15	5	0	2	2	-1	3
39	2000-01-01	1899-12-31 12:00:00	72	2	-1	-3	-3	0	0	2	1	-4	-1	15	15	15	15	15	15	15	15	15	15	-2	1	0	1	0	3	1	2	2	2	15	15	15	15	15	15	15	15	15	15	5	0	2	2	-1	3
40	2000-01-01	1899-12-31 12:00:00	72	2	-1	-3	-3	0	0	2	1	-4	-1	15	15	15	15	15	15	15	15	15	15	-2	1	0	1	0	3	1	2	2	2	15	15	15	15	15	15	15	15	15	15	5	0	2	2	-1	3
41	2000-01-01	1899-12-31 12:00:00	72	2	-1	-3	-3	0	0	2	1	-4	-1	15	15	15	15	15	15	15	15	15	15	-2	1	0	1	0	3	1	2	2	2	15	15	15	15	15	15	15	15	15	15	5	0	2	2	-1	3
42	2000-01-01	1899-12-31 12:00:00	72	2	-1	-3	-3	0	0	2	1	-4	-1	15	15	15	15	15	15	15	15	15	15	-2	1	0	1	0	3	1	2	2	2	15	15	15	15	15	15	15	15	15	15	5	0	2	2	-1	3
43	2000-01-01	1899-12-31 12:00:00	72	2	-1	-3	-3	0	0	2	1	-4	-1	15	15	15	15	15	15	15	15	15	15	-2	1	0	1	0	3	1	2	2	2	15	15	15	15	15	15	15	15	15	15	5	0	2	2	-1	3
44	2000-01-01	1899-12-31 12:00:00	72	2	-1	-3	-3	0	0	2	1	-4	-1	15	15	15	15	15	15	15	15	15	15	-2	1	0	1	0	3	1	2	2	2	15	15	15	15	15	15	15	15	15	15	5	0	2	2	-1	3
45	2000-01-01	1899-12-31 12:00:00	72	2	-1	-3	-3	0	0	2	1	-4	-1	15	15	15	15	15	15	15	15	15	15	-2	1	0	1	0	3	1	2	2	2	15	15	15	15	15	15	15	15	15	15	5	0	2	2	-1	3
46	2000-01-01	1899-12-31 12:00:00	72	2	-1	-3	-3	0	0	2	1	-4	-1	15	15	15	15	15	15	15	15	15	15	-2	1	0	1	0	3	1	2	2	2	15	15	15	15	15	15	15	15	15	15	5	0	2	2	-1	3
47	2000-01-01	1899-12-31 12:00:00	72	2	-1	-3	-3	0	0	2	1	-4	-1	15	15	15	15	15	15	15	15	15	15	-2	1	0	1	0	3	1	2	2	2	15	15	15	15	15	15	15	15	15	15	5	0	2	2	-1	3
48	2000-01-01	1899-12-31 12:00:00	72	2	-1	-3	-3	0	0	2	1	-4	-1	15	15	15	15	15	15	15	15	15	15	-2	1	0	1	0	3	1	2	2	2	15	15	15	15	15	15	15	15	15	15	5	0	2	2	-1	3
49	2000-01-01	1899-12-31 12:00:00	72	2	-1	-3	-3	0	0	2	1	-4	-1	15	15	15	15	15	15	15	15	15	15	-2	1	0	1	0	3	1	2	2	2	15	15	15	15	15	15	15	15	15	15	5	0	2	2	-1	3
50	2000-01-01	1899-12-31 12:00:00	72	2	-1	-3	-3	0	0	2	1	-4	-1	15	15	15	15	15	15	15	15	15	15	-2	1	0	1	0	3	1	2	2	2	15	15	15	15	15	15	15	15	15	15	5	0	2	2	-1	3
51	2000-01-01	1899-12-31 12:00:00	72	2	-1	-3	-3	0	0	2	1	-4	-1	15	15	15	15	15	15	15	15	15	15	-2	1	0	1	0	3	1	2	2	2	15	15	15	15	15	15	15	15	15	15	5	0	2	2	-1	3
52	2000-01-01	1899-12-31 12:00:00	72	2	-1	-3	-3	0	0	2	1	-4	-1	15	15	15	15	15	15	15	15	15	15	-2	1	0	1	0	3	1	2	2	2	15	15	15	15	15	15	15	15	15	15	5	0	2	2	-1	3
53	2000-01-01	1899-12-31 12:00:00	72	2	-1	-3	-3	0	0	2	1	-4	-1	15	15	15	15	15	15	15	15	15	15	-2	1	0	1	0	3	1	2	2	2	15	15	15	15	15	15	15	15	15	15	5	0	2	2	-1	3
54	2000-01-01	1899-12-31 12:00:00	72	2	-1	-3	-3	0	0	2	1	-4	-1	15	15	15	15	15	15	15	15	15	15	-2	1	0	1	0	3	1	2	2	2	15	15	15	15	15	15	15	15	15	15	5	0	2	2	-1	3
55	2000-01-01	1899-12-31 12:00:00	72	2	-1	-3	-3	0	0	2	1	-4	-1	15	15	15	15	15	15	15	15	15	15	-2	1	0	1	0	3	1	2	2	2	15	15	15	15	15	15	15	15	15	15	5	0	2	2	-1	3
56	2000-01-01	1899-12-31 12:00:00	72	2	-1	-3	-3	0	0	2	1	-4	-1	15	15	15	15	15	15	15	15	15	15	-2	1	0	1	0	3	1	2	2	2	15	15	15	15	15	15	15	15	15	15	5	0	2	2	-1	3
57	2000-01-01	1899-12-31 12:00:00	72	2	-1	-3	-3	0	0	2	1	-4	-1	15	15	15	15	15	15	15	15	15	15	-2	1	0	1	0	3	1	2	2	2	15	15	15	15	15	15	15	15	15	15	5	0	2	2	-1	3
58	2000-01-01	1899-12-31 12:00:00	72	2	-1	-3	-3	0	0	2	1	-4	-1	15	15	15	15	15	15	15	15	15	15	-2	1	0	1	0	3	1	2	2	2	15	15	15	15	15	15	15	15	15	15	5	0	2	2	-1	3
59	2000-01-01	1899-12-31 12:00:00	72	2	-1	-3	-3	0	0	2	1	-4	-1	15	15	15	15	15	15	15	15	15	15	-2	1	0	1	0	3	1	2	2	2	15	15	15	15	15	15	15	15	15	15	5	0	2	2	-1	3
60	2000-01-01	1899-12-31 12:00:00	72	2	-1	-3	-3	0	0	2	1	-4	-1	15	15	15	15	15	15	15	15	15	15	-2	1	0	1	0	3	1	2	2	2	15	15	15	15	15	15	15	15	15	15	5	0	2	2	-1	3
61	2000-01-01	1899-12-31 12:00:00	72	2	-1	-3	-3	0	0	2	1	-4	-1	15	15	15	15	15	15	15	15	15	15	-2	1	0	1	0	3	1	2	2	2	15	15	15	15	15	15	15	15	15	15	5	0	2	2	-1	3
62	2000-01-01	1899-12-31 12:00:00	72	2	-1	-3	-3	0	0	2	1	-4	-1	15	15	15	15	15	15	15	15	15	15	-2	1	0	1	0	3	1	2	2	2	15	15	15	15	15	15	15	15	15	15	5	0	2	2	-1	3
63	2000-01-01	1899-12-31 12:00:00	72	2	-1	-3	-3	0	0	2	1	-4	-1	15	15	15	15	15	15	15	15	15	15	-2	1	0	1	0	3	1	2	2	2	15	15	15	15	15	15	15	15	15	15	5	0	2	2	-1	3
64	2000-01-01	1899-12-31 12:00:00	72	2	-1	-3	-3	0	0	2	1	-4	-1	15	15	15	15	15	15	15	15	15	15	-2	1	0	1	0	3	1	2	2	2	15	15	15	15	15	15	15	15	15	15	5	0	2	2	-1	3
65	2000-01-01	1899-12-31 12:00:00	72	2	-1	-3	-3	0	0	2	1	-4	-1	15	15	15	15	15	15	15	15	15	15	-2	1	0	1	0	3	1	2	2	2	15	15	15	15	15	15	15	15	15	15	5	0	2	2	-1	3
66	2000-01-01	1899-12-31 12:00:00	72	2	-1	-3	-3	0	0	2	1	-4	-1	15	15	15	15	15	15	15	15	15	15	-2	1	0	1	0	3	1	2	2	2	15	15	15	15	15	15	15	15	15	15	5	0	2	2	-1	3
67	2000-01-01	1899-12-31 12:00:00	72	2	-1	-3	-3	0	0	2	1	-4	-1	15	15	15	15	15	15	15	15	15	15	-2	1	0	1	0	3	1	2	2	2	15	15	15	15	15	15	15	15	15	15	5	0	2	2	-1	3
68	2000-01-01	1899-12-31 12:00:00	72	2	-1	-3	-3	0	0	2	1	-4	-1	15	15	15	15	15	15	15	15	15	15	-2	1	0	1	0	3	1	2	2	2	15	15	15	15	15	15	15	15	15	15	5	0	2	2	-1	3
69	2000-01-01	1899-12-31 12:00:00	72	2	-1	-3	-3	0	0	2	1	-4	-1	15	15	15	15	15	15	15	15	15	15	-2	1	0	1	0	3	1	2	2	2	15	15	15	15	15	15	15	15	15	15	5	0	2	2	-1	3
70	2000-01-01	1899-12-31 12:00:00	72	2	-1	-3	-3	0	0	2	1	-4	-1	15	15	15	15	15	15	15	15	15	15	-2	1	0	1	0	3	1	2	2	2	15	15	15	15	15	15	15	15	15	15	5	0	2	2	-1	3
71	2000-01-01	1899-12-31 12:00:00	72	2	-1	-3	-3	0	0	2	1	-4	-1	15	15	15	15	15	15	15	15	15	15	-2	1	0	1	0	3	1	2	2	2	15	15	15	15	15	15	15	15	15	15	5	0	2	2	-1	3
72	2000-01-01	1899-12-31 12:00:00	72	2	-1	-3	-3	0	0	2	1	-4	-1	15	15	15	15	15	15	15	15	15	15	-2	1	0	1	0	3	1	2	2	2	15	15	15	15	15	15	15	15	15	15	5	0	2	2	-1	3
73	2000-01-01	1899-12-31 12:00:00	72	2	-1	-3	-3	0	0	2	1	-4	-1	15	15	15	15	15	15	15	15	15	15	-2	1	0	1	0	3	1	2	2	2	15	15	15	15	15	15	15	15	15	15	5	0	2	2	-1	3
74	2000-01-01	1899-12-31 12:00:00	72	2	-1	-3	-3	0	0	2	1	-4	-1	15	15	15	15	15	15	15	15	15	15	-2	1	0	1	0	3	1	2	2	2	15	15	15	15	15	15	15	15	15	15	5	0	2	2	-1	3
75	2000-01-01	1899-12-31 12:00:00	72	2	-1	-3	-3	0	0	2	1	-4	-1	15	15	15	15	15	15	15	15	15	15	-2	1	0	1	0	3	1	2	2	2	15	15	15	15	15	15	15	15	15	15	5	0	2	2	-1	3
				2	-1	-3	-3	0	0	2	1	-4	-1	15	15	15	15	15	15	15	15	15	15	-2	1	0	1	0	3	1	2	2	2	15	15	15	15	15	15	15	15	15	15	5	0	2	2	-1	3
[truncated: 154 more columns]

## Sheet: Px per bottle
			deaths
				15	15	15	15	15	15	15	15	15	15	15	15	15	15	15	15	15	15	15	15	15	15	15	15	15	15	15	15	15	15	15	15	15	15	15	15	15	15	15	15	15	15	15	15	15	15
0				13	16	18	18	15	15	13	14	19	16	0	0	0	0	0	0	0	0	0	0	17	14	15	14	15	12	14	13	13	13	0	0	0	0	0	0	0	0	0	0	10	15	13	13	16	12
	date	time	day	1	2	3	4	5	6	7	8	9	10	11	12	13	14	15	16	17	18	19	20	21	22	23	24	25	26	27	28	29	30	31	32	33	34	35	36	37	38	39	40	41	42	43	44	45	46
1	2020-08-12	1899-12-31 12:00:00	2	1	1	1	1	1	1	1	1	1	1	1	1	1	1	1	1	1	1	1	1	1	1	1	1	1	1	1	1	1	1	1	1	1	1	1	1	1	1	1	1	1	1	1	1	1	1
2	2020-08-14	1899-12-31 12:00:00	4	1	1	1	1	1	1	1	1	1	1	1	1	1	1	1	1	1	1	1	1	1	1	1	1	1	1	1	1	1	1	1	1	1	1	1	1	1	1	1	1	1	1	1	1	1	1
3	2020-08-17	1899-12-31 12:00:00	7	1	1	1	0.866667	1	1	1	1	1	0.928571	1	1	1	1	1	1	1	1	1	1	1	1	1	1	1	1	1	1	1	1	1	1	1	1	1	1	1	1	1	1	1	1	1	1	1	0.933333
4	2020-08-19	1899-12-31 12:00:00	9	1	1	1	0.866667	1	1	1	1	1	0.928571	1	1	1	1	1	1	1	1	1	1	1	1	1	1	1	1	1	1	1	1	1	1	1	1	1	1	1	1	1	1	1	1	1	1	1	0.933333
5	2020-08-21	1899-12-31 12:00:00	11	1	0.846154	0.857143	0.866667	0.916667	1	1	1	1	0.844156	1	1	1	1	1	1	1	1	1	1	1	1	1	1	1	1	1	1	1	0.933333	1	1	1	1	1	1	1	1	1	1	0.933333	1	1	0.857143	1	0.8
6	2020-08-24	1899-12-31 12:00:00	14	1	0.846154	0.785714	0.866667	0.666667	0.923077	0.928571	1	0.818182	0.844156	1	1	1	1	1	1	1	1	1	1	1	1	1	1	1	1	0.928571	1	1	0.933333	1	1	1	1	1	1	1	1	1	1	0.933333	1	1	0.857143	0.923077	0.8
7	2020-08-26	1899-12-31 12:00:00	16	1	0.846154	0.707143	0.8	0.666667	0.692308	0.857143	1	0.818182	0.844156	1	1	1	1	1	1	1	1	1	1	1	0.933333	1	1	1	1	0.928571	1	0.933333	0.933333	1	1	1	1	1	1	1	1	1	1	0.933333	1	1	0.857143	0.923077	0.8
8	2020-08-28	1899-12-31 12:00:00	18	1	0.846154	0.707143	0.733333	0.583333	0.692308	0.642857	1	0.727273	0.844156	1	1	1	1	1	1	1	1	1	1	0.666667	0.8	1	1	1	1	0.928571	1	0.933333	0.933333	1	1	1	1	1	1	1	1	1	1	0.933333	1	1	0.857143	0.923077	0.8
9	2020-08-31	1899-12-31 12:00:00	21	0.692308	0.592308	0.235714	0.333333	0.466667	0.538462	0.285714	0.583333	0.545455	0.562771	1	1	1	1	1	1	1	1	1	1	0.133333	0.733333	0.933333	0.933333	0.866667	0.933333	0.785714	1	0.933333	0.866667	1	1	1	1	1	1	1	1	1	1	0.666667	0.714286	0.615385	0.701299	0.769231	0.533333
10	2020-09-02	1899-12-31 12:00:00	23	0.494505	0.49359	-0.0785714	0.0666667	0.35	0.384615	0.285714	0.486111	0.181818	0.37518	1	1	1	1	1	1	1	1	1	1	0.0666667	0.651852	0.866667	0.933333	0.8	0.933333	0.785714	0.933333	0.933333	0.866667	1	1	1	1	1	1	1	1	1	1	0.518519	0.642857	0.538462	0.623377	0.615385	0.4
11	2020-09-04	1899-12-31 12:00:00	25	0.296703	0.394872	-0.0785714	0.0666667	0.35	0.153846	0.285714	0.291667	0.0909091	0.37518	1	1	1	1	1	1	1	1	1	1	0.0666667	0.651852	0.866667	0.8	0.8	0.933333	0.785714	0.933333	0.933333	0.866667	1	1	1	1	1	1	1	1	1	1	0.518519	0.5	0.461538	0.623377	0.538462	0.333333
12	2020-09-07	1899-12-31 12:00:00	28	0.296703	0.296154	-0.0785714	-0.0666667	0.233333	0.0769231	0.285714	0.194444	-0.181818	0.12506	1	1	1	1	1	1	1	1	1	1	0	0.57037	0.866667	0.733333	0.8	0.933333	0.785714	0.933333	0.933333	0.866667	1	1	1	1	1	1	1	1	1	1	0.444444	0.357143	0.461538	0.545455	0.538462	0.333333
13	2020-09-09	1899-12-31 12:00:00	30	0.296703	0.0987179	-0.0785714	-0.0666667	0.233333	0	0.285714	0.194444	-0.181818	0.12506	1	1	1	1	1	1	1	1	1	1	#DIV/0!	0.57037	0.722222	0.733333	0.8	0.933333	0.785714	0.933333	0.933333	0.866667	1	1	1	1	1	1	1	1	1	1	0.444444	0.285714	0.461538	0.467532	0.384615	0.333333
14	2020-09-12	1899-12-31 12:00:00	33	0.197802	0.0987179	-0.0785714	-0.133333	0.116667	#DIV/0!	0.285714	0.194444	-0.181818	0	1	1	1	1	1	1	1	1	1	1	#DIV/0!	0.488889	0.65	0.733333	0.8	0.933333	0.785714	0.933333	0.866667	0.866667	1	1	1	1	1	1	1	1	1	1	0.444444	0.142857	0.307692	0.311688	0	0.266667
15	2020-09-13	1899-12-31 12:00:00	34	0.197802	0.0987179	-0.0785714	-0.2	0.116667	#DIV/0!	0.214286	0.0972222	-0.181818	#DIV/0!	1	1	1	1	1	1	1	1	1	1	#DIV/0!	0.488889	0.577778	0.733333	0.8	0.933333	0.785714	0.933333	0.866667	0.866667	1	1	1	1	1	1	1	1	1	1	0.444444	0.0714286	0.307692	0.233766	#DIV/0!	0.266667
16	2020-09-16	1899-12-31 12:00:00	37	0.197802	0.0987179	-0.157143	-0.2	0	#DIV/0!	0.214286	0.0972222	-0.181818	#DIV/0!	1	1	1	1	1	1	1	1	1	1	#DIV/0!	0.488889	0.577778	0.733333	0.8	0.933333	0.785714	0.933333	0.866667	0.866667	1	1	1	1	1	1	1	1	1	1	0.444444	0.0714286	0.307692	0.233766	#DIV/0!	0.266667
17	2020-09-18	1899-12-31 12:00:00	39	0.197802	0.0987179	-0.157143	-0.2	#DIV/0!	#DIV/0!	0.214286	0.0972222	-0.181818	#DIV/0!	1	1	1	1	1	1	1	1	1	1	#DIV/0!	0.488889	0.577778	0.666667	0.8	0.933333	0.785714	0.933333	0.866667	0.866667	1	1	1	1	1	1	1	1	1	1	0.444444	0.0714286	0.307692	0.233766	#DIV/0!	0.266667
18	2020-09-21	1899-12-31 12:00:00	42	0.197802	0	-0.157143	-0.2	#DIV/0!	#DIV/0!	0.142857	0.0972222	-0.272727	#DIV/0!	1	1	1	1	1	1	1	1	1	1	#DIV/0!	0.488889	0.577778	0.666667	0.8	0.933333	0.785714	0.933333	0.866667	0.866667	1	1	1	1	1	1	1	1	1	1	0.37037	0	0.153846	0.155844	#DIV/0!	0.2
19	2020-09-23	1899-12-31 12:00:00	44	0.197802	#DIV/0!	-0.157143	-0.2	#DIV/0!	#DIV/0!	0.142857	0.0972222	-0.272727	#DIV/0!	1	1	1	1	1	1	1	1	1	1	#DIV/0!	0.488889	0.577778	0.6	0.8	0.933333	0.785714	0.933333	0.866667	0.866667	1	1	1	1	1	1	1	1	1	1	0.37037	#DIV/0!	0.153846	0.155844	#DIV/0!	0.2
20	2020-09-25	1899-12-31 12:00:00	46	0.197802	#DIV/0!	-0.235714	-0.2	#DIV/0!	#DIV/0!	0.142857	0.0972222	-0.272727	#DIV/0!	1	1	1	1	1	1	1	1	1	1	#DIV/0!	0.488889	0.577778	0.6	0.8	0.933333	0.642857	0.933333	0.866667	0.8	1	1	1	1	1	1	1	1	1	1	0.37037	#DIV/0!	0.153846	0.155844	#DIV/0!	0.2
21	2020-09-28	1899-12-31 12:00:00	49	0.197802	#DIV/0!	-0.235714	-0.2	#DIV/0!	#DIV/0!	0.142857	0.0972222	-0.363636	#DIV/0!	1	1	1	1	1	1	1	1	1	1	#DIV/0!	0.407407	0.288889	0.4	0.6	0.6	0.285714	0.866667	0.4	0.666667	1	1	1	1	1	1	1	1	1	1	0.37037	#DIV/0!	0.153846	0.155844	#DIV/0!	0.2
22	2020-09-30	1899-12-31 12:00:00	51	0.197802	#DIV/0!	-0.235714	-0.2	#DIV/0!	#DIV/0!	0.142857	0.0972222	-0.363636	#DIV/0!	1	1	1	1	1	1	1	1	1	1	#DIV/0!	0.325926	0.288889	0.4	0.466667	0.6	0.285714	0.794444	0.4	0.666667	1	1	1	1	1	1	1	1	1	1	0.37037	#DIV/0!	0.153846	0.155844	#DIV/0!	0.2
23	2020-10-02	1899-12-31 12:00:00	53	0.197802	#DIV/0!	-0.235714	-0.2	#DIV/0!	#DIV/0!	0.142857	0.0972222	-0.363636	#DIV/0!	1	1	1	1	1	1	1	1	1	1	#DIV/0!	0.325926	0.288889	0.266667	0.466667	0.6	0.285714	0.794444	0.4	0.666667	1	1	1	1	1	1	1	1	1	1	0.37037	#DIV/0!	0.153846	0.155844	#DIV/0!	0.2
24	2020-10-05	1899-12-31 12:00:00	56	0.197802	#DIV/0!	-0.235714	-0.2	#DIV/0!	#DIV/0!	0.142857	0.0972222	-0.363636	#DIV/0!	1	1	1	1	1	1	1	1	1	1	#DIV/0!	0.325926	0.144444	0.133333	0.2	0.333333	0.214286	0.505556	0.266667	0.466667	1	1	1	1	1	1	1	1	1	1	0.37037	#DIV/0!	0.153846	0.155844	#DIV/0!	0.2
25	2020-10-07	1899-12-31 12:00:00	58	0.197802	#DIV/0!	-0.235714	-0.2	#DIV/0!	#DIV/0!	0.142857	0.0972222	-0.363636	#DIV/0!	1	1	1	1	1	1	1	1	1	1	#DIV/0!	0.325926	0.144444	0.0666667	0.133333	0.266667	0.142857	0.361111	0.2	0.266667	1	1	1	1	1	1	1	1	1	1	0.37037	#DIV/0!	0.153846	0.155844	#DIV/0!	0.2
26	2020-10-09	1899-12-31 12:00:00	60	0.197802	#DIV/0!	-0.235714	-0.2	#DIV/0!	#DIV/0!	0.142857	0.0972222	-0.363636	#DIV/0!	1	1	1	1	1	1	1	1	1	1	#DIV/0!	0.244444	0.0722222	0.0666667	0.133333	0.266667	0.0714286	0.240741	0.2	0.266667	1	1	1	1	1	1	1	1	1	1	0.37037	#DIV/0!	0.153846	0.155844	#DIV/0!	0.2
27	2020-10-12	1899-12-31 12:00:00	63	0.197802	#DIV/0!	-0.235714	-0.2	#DIV/0!	#DIV/0!	0.142857	0.0972222	-0.363636	#DIV/0!	1	1	1	1	1	1	1	1	1	1	#DIV/0!	0.162963	0.0722222	0.0666667	0.0666667	0.266667	0.0714286	0.240741	0.2	0.266667	1	1	1	1	1	1	1	1	1	1	0.37037	#DIV/0!	0.153846	0.155844	#DIV/0!	0.2
28	2020-10-14	1899-12-31 12:00:00	65	0.197802	#DIV/0!	-0.235714	-0.2	#DIV/0!	#DIV/0!	0.142857	0.0972222	-0.363636	#DIV/0!	1	1	1	1	1	1	1	1	1	1	#DIV/0!	0.0814815	0	0.0666667	0	0.2	0.0714286	0.240741	0.2	0.133333	1	1	1	1	1	1	1	1	1	1	0.37037	#DIV/0!	0.153846	0.155844	#DIV/0!	0.2
29	2020-10-16	1899-12-31 12:00:00	67	0.197802	#DIV/0!	-0.235714	-0.2	#DIV/0!	#DIV/0!	0.142857	0.0972222	-0.363636	#DIV/0!	1	1	1	1	1	1	1	1	1	1	#DIV/0!	0.0814815	#DIV/0!	0.0666667	#DIV/0!	0.2	0.0714286	0.240741	0.133333	0.133333	1	1	1	1	1	1	1	1	1	1	0.37037	#DIV/0!	0.153846	0.155844	#DIV/0!	0.2
30	2020-10-19	1899-12-31 12:00:00	70	0.197802	#DIV/0!	-0.235714	-0.2	#DIV/0!	#DIV/0!	0.142857	0.0972222	-0.363636	#DIV/0!	1	1	1	1	1	1	1	1	1	1	#DIV/0!	0.0814815	#DIV/0!	0.0666667	#DIV/0!	0.2	0.0714286	0.240741	0.133333	0.133333	1	1	1	1	1	1	1	1	1	1	0.37037	#DIV/0!	0.153846	0.155844	#DIV/0!	0.2
31	2020-10-21	1899-12-31 12:00:00	72	0.197802	#DIV/0!	-0.235714	-0.2	#DIV/0!	#DIV/0!	0.142857	0.0972222	-0.363636	#DIV/0!	1	1	1	1	1	1	1	1	1	1	#DIV/0!	0.0814815	#DIV/0!	0.0666667	#DIV/0!	0.2	0.0714286	0.240741	0.133333	0.133333	1	1	1	1	1	1	1	1	1	1	0.37037	#DIV/0!	0.153846	0.155844	#DIV/0!	0.2
32	2000-01-01	1899-12-31 12:00:00	72	0.197802	#DIV/0!	-0.235714	-0.2	#DIV/0!	#DIV/0!	0.142857	0.0972222	-0.363636	#DIV/0!	1	1	1	1	1	1	1	1	1	1	#DIV/0!	0.0814815	#DIV/0!	0.0666667	#DIV/0!	0.2	0.0714286	0.240741	0.133333	0.133333	1	1	1	1	1	1	1	1	1	1	0.37037	#DIV/0!	0.153846	0.155844	#DIV/0!	0.2
33	2000-01-01	1899-12-31 12:00:00	72	0.197802	#DIV/0!	-0.235714	-0.2	#DIV/0!	#DIV/0!	0.142857	0.0972222	-0.363636	#DIV/0!	1	1	1	1	1	1	1	1	1	1	#DIV/0!	0.0814815	#DIV/0!	0.0666667	#DIV/0!	0.2	0.0714286	0.240741	0.133333	0.133333	1	1	1	1	1	1	1	1	1	1	0.37037	#DIV/0!	0.153846	0.155844	#DIV/0!	0.2
34	2000-01-01	1899-12-31 12:00:00	72	0.197802	#DIV/0!	-0.235714	-0.2	#DIV/0!	#DIV/0!	0.142857	0.0972222	-0.363636	#DIV/0!	1	1	1	1	1	1	1	1	1	1	#DIV/0!	0.0814815	#DIV/0!	0.0666667	#DIV/0!	0.2	0.0714286	0.240741	0.133333	0.133333	1	1	1	1	1	1	1	1	1	1	0.37037	#DIV/0!	0.153846	0.155844	#DIV/0!	0.2
35	2000-01-01	1899-12-31 12:00:00	72	0.197802	#DIV/0!	-0.235714	-0.2	#DIV/0!	#DIV/0!	0.142857	0.0972222	-0.363636	#DIV/0!	1	1	1	1	1	1	1	1	1	1	#DIV/0!	0.0814815	#DIV/0!	0.0666667	#DIV/0!	0.2	0.0714286	0.240741	0.133333	0.133333	1	1	1	1	1	1	1	1	1	1	0.37037	#DIV/0!	0.153846	0.155844	#DIV/0!	0.2
36	2000-01-01	1899-12-31 12:00:00	72	0.197802	#DIV/0!	-0.235714	-0.2	#DIV/0!	#DIV/0!	0.142857	0.0972222	-0.363636	#DIV/0!	1	1	1	1	1	1	1	1	1	1	#DIV/0!	0.0814815	#DIV/0!	0.0666667	#DIV/0!	0.2	0.0714286	0.240741	0.133333	0.133333	1	1	1	1	1	1	1	1	1	1	0.37037	#DIV/0!	0.153846	0.155844	#DIV/0!	0.2
37	2000-01-01	1899-12-31 12:00:00	72	0.197802	#DIV/0!	-0.235714	-0.2	#DIV/0!	#DIV/0!	0.142857	0.0972222	-0.363636	#DIV/0!	1	1	1	1	1	1	1	1	1	1	#DIV/0!	0.0814815	#DIV/0!	0.0666667	#DIV/0!	0.2	0.0714286	0.240741	0.133333	0.133333	1	1	1	1	1	1	1	1	1	1	0.37037	#DIV/0!	0.153846	0.155844	#DIV/0!	0.2
38	2000-01-01	1899-12-31 12:00:00	72	0.197802	#DIV/0!	-0.235714	-0.2	#DIV/0!	#DIV/0!	0.142857	0.0972222	-0.363636	#DIV/0!	1	1	1	1	1	1	1	1	1	1	#DIV/0!	0.0814815	#DIV/0!	0.0666667	#DIV/0!	0.2	0.0714286	0.240741	0.133333	0.133333	1	1	1	1	1	1	1	1	1	1	0.37037	#DIV/0!	0.153846	0.155844	#DIV/0!	0.2
39	2000-01-01	1899-12-31 12:00:00	72	0.197802	#DIV/0!	-0.235714	-0.2	#DIV/0!	#DIV/0!	0.142857	0.0972222	-0.363636	#DIV/0!	1	1	1	1	1	1	1	1	1	1	#DIV/0!	0.0814815	#DIV/0!	0.0666667	#DIV/0!	0.2	0.0714286	0.240741	0.133333	0.133333	1	1	1	1	1	1	1	1	1	1	0.37037	#DIV/0!	0.153846	0.155844	#DIV/0!	0.2
40	2000-01-01	1899-12-31 12:00:00	72	0.197802	#DIV/0!	-0.235714	-0.2	#DIV/0!	#DIV/0!	0.142857	0.0972222	-0.363636	#DIV/0!	1	1	1	1	1	1	1	1	1	1	#DIV/0!	0.0814815	#DIV/0!	0.0666667	#DIV/0!	0.2	0.0714286	0.240741	0.133333	0.133333	1	1	1	1	1	1	1	1	1	1	0.37037	#DIV/0!	0.153846	0.155844	#DIV/0!	0.2
41	2000-01-01	1899-12-31 12:00:00	72	0.197802	#DIV/0!	-0.235714	-0.2	#DIV/0!	#DIV/0!	0.142857	0.0972222	-0.363636	#DIV/0!	1	1	1	1	1	1	1	1	1	1	#DIV/0!	0.0814815	#DIV/0!	0.0666667	#DIV/0!	0.2	0.0714286	0.240741	0.133333	0.133333	1	1	1	1	1	1	1	1	1	1	0.37037	#DIV/0!	0.153846	0.155844	#DIV/0!	0.2
42	2000-01-01	1899-12-31 12:00:00	72	0.197802	#DIV/0!	-0.235714	-0.2	#DIV/0!	#DIV/0!	0.142857	0.0972222	-0.363636	#DIV/0!	1	1	1	1	1	1	1	1	1	1	#DIV/0!	0.0814815	#DIV/0!	0.0666667	#DIV/0!	0.2	0.0714286	0.240741	0.133333	0.133333	1	1	1	1	1	1	1	1	1	1	0.37037	#DIV/0!	0.153846	0.155844	#DIV/0!	0.2
43	2000-01-01	1899-12-31 12:00:00	72	0.197802	#DIV/0!	-0.235714	-0.2	#DIV/0!	#DIV/0!	0.142857	0.0972222	-0.363636	#DIV/0!	1	1	1	1	1	1	1	1	1	1	#DIV/0!	0.0814815	#DIV/0!	0.0666667	#DIV/0!	0.2	0.0714286	0.240741	0.133333	0.133333	1	1	1	1	1	1	1	1	1	1	0.37037	#DIV/0!	0.153846	0.155844	#DIV/0!	0.2
44	2000-01-01	1899-12-31 12:00:00	72	0.197802	#DIV/0!	-0.235714	-0.2	#DIV/0!	#DIV/0!	0.142857	0.0972222	-0.363636	#DIV/0!	1	1	1	1	1	1	1	1	1	1	#DIV/0!	0.0814815	#DIV/0!	0.0666667	#DIV/0!	0.2	0.0714286	0.240741	0.133333	0.133333	1	1	1	1	1	1	1	1	1	1	0.37037	#DIV/0!	0.153846	0.155844	#DIV/0!	0.2
45	2000-01-01	1899-12-31 12:00:00	72	0.197802	#DIV/0!	-0.235714	-0.2	#DIV/0!	#DIV/0!	0.142857	0.0972222	-0.363636	#DIV/0!	1	1	1	1	1	1	1	1	1	1	#DIV/0!	0.0814815	#DIV/0!	0.0666667	#DIV/0!	0.2	0.0714286	0.240741	0.133333	0.133333	1	1	1	1	1	1	1	1	1	1	0.37037	#DIV/0!	0.153846	0.155844	#DIV/0!	0.2
46	2000-01-01	1899-12-31 12:00:00	72	0.197802	#DIV/0!	-0.235714	-0.2	#DIV/0!	#DIV/0!	0.142857	0.0972222	-0.363636	#DIV/0!	1	1	1	1	1	1	1	1	1	1	#DIV/0!	0.0814815	#DIV/0!	0.0666667	#DIV/0!	0.2	0.0714286	0.240741	0.133333	0.133333	1	1	1	1	1	1	1	1	1	1	0.37037	#DIV/0!	0.153846	0.155844	#DIV/0!	0.2
47	2000-01-01	1899-12-31 12:00:00	72	0.197802	#DIV/0!	-0.235714	-0.2	#DIV/0!	#DIV/0!	0.142857	0.0972222	-0.363636	#DIV/0!	1	1	1	1	1	1	1	1	1	1	#DIV/0!	0.0814815	#DIV/0!	0.0666667	#DIV/0!	0.2	0.0714286	0.240741	0.133333	0.133333	1	1	1	1	1	1	1	1	1	1	0.37037	#DIV/0!	0.153846	0.155844	#DIV/0!	0.2
48	2000-01-01	1899-12-31 12:00:00	72	0.197802	#DIV/0!	-0.235714	-0.2	#DIV/0!	#DIV/0!	0.142857	0.0972222	-0.363636	#DIV/0!	1	1	1	1	1	1	1	1	1	1	#DIV/0!	0.0814815	#DIV/0!	0.0666667	#DIV/0!	0.2	0.0714286	0.240741	0.133333	0.133333	1	1	1	1	1	1	1	1	1	1	0.37037	#DIV/0!	0.153846	0.155844	#DIV/0!	0.2
49	2000-01-01	1899-12-31 12:00:00	72	0.197802	#DIV/0!	-0.235714	-0.2	#DIV/0!	#DIV/0!	0.142857	0.0972222	-0.363636	#DIV/0!	1	1	1	1	1	1	1	1	1	1	#DIV/0!	0.0814815	#DIV/0!	0.0666667	#DIV/0!	0.2	0.0714286	0.240741	0.133333	0.133333	1	1	1	1	1	1	1	1	1	1	0.37037	#DIV/0!	0.153846	0.155844	#DIV/0!	0.2
50	2000-01-01	1899-12-31 12:00:00	72	0.197802	#DIV/0!	-0.235714	-0.2	#DIV/0!	#DIV/0!	0.142857	0.0972222	-0.363636	#DIV/0!	1	1	1	1	1	1	1	1	1	1	#DIV/0!	0.0814815	#DIV/0!	0.0666667	#DIV/0!	0.2	0.0714286	0.240741	0.133333	0.133333	1	1	1	1	1	1	1	1	1	1	0.37037	#DIV/0!	0.153846	0.155844	#DIV/0!	0.2
51	2000-01-01	1899-12-31 12:00:00	72	0.197802	#DIV/0!	-0.235714	-0.2	#DIV/0!	#DIV/0!	0.142857	0.0972222	-0.363636	#DIV/0!	1	1	1	1	1	1	1	1	1	1	#DIV/0!	0.0814815	#DIV/0!	0.0666667	#DIV/0!	0.2	0.0714286	0.240741	0.133333	0.133333	1	1	1	1	1	1	1	1	1	1	0.37037	#DIV/0!	0.153846	0.155844	#DIV/0!	0.2
52	2000-01-01	1899-12-31 12:00:00	72	0.197802	#DIV/0!	-0.235714	-0.2	#DIV/0!	#DIV/0!	0.142857	0.0972222	-0.363636	#DIV/0!	1	1	1	1	1	1	1	1	1	1	#DIV/0!	0.0814815	#DIV/0!	0.0666667	#DIV/0!	0.2	0.0714286	0.240741	0.133333	0.133333	1	1	1	1	1	1	1	1	1	1	0.37037	#DIV/0!	0.153846	0.155844	#DIV/0!	0.2
53	2000-01-01	1899-12-31 12:00:00	72	0.197802	#DIV/0!	-0.235714	-0.2	#DIV/0!	#DIV/0!	0.142857	0.0972222	-0.363636	#DIV/0!	1	1	1	1	1	1	1	1	1	1	#DIV/0!	0.0814815	#DIV/0!	0.0666667	#DIV/0!	0.2	0.0714286	0.240741	0.133333	0.133333	1	1	1	1	1	1	1	1	1	1	0.37037	#DIV/0!	0.153846	0.155844	#DIV/0!	0.2
54	2000-01-01	1899-12-31 12:00:00	72	0.197802	#DIV/0!	-0.235714	-0.2	#DIV/0!	#DIV/0!	0.142857	0.0972222	-0.363636	#DIV/0!	1	1	1	1	1	1	1	1	1	1	#DIV/0!	0.0814815	#DIV/0!	0.0666667	#DIV/0!	0.2	0.0714286	0.240741	0.133333	0.133333	1	1	1	1	1	1	1	1	1	1	0.37037	#DIV/0!	0.153846	0.155844	#DIV/0!	0.2
55	2000-01-01	1899-12-31 12:00:00	72	0.197802	#DIV/0!	-0.235714	-0.2	#DIV/0!	#DIV/0!	0.142857	0.0972222	-0.363636	#DIV/0!	1	1	1	1	1	1	1	1	1	1	#DIV/0!	0.0814815	#DIV/0!	0.0666667	#DIV/0!	0.2	0.0714286	0.240741	0.133333	0.133333	1	1	1	1	1	1	1	1	1	1	0.37037	#DIV/0!	0.153846	0.155844	#DIV/0!	0.2
56	2000-01-01	1899-12-31 12:00:00	72	0.197802	#DIV/0!	-0.235714	-0.2	#DIV/0!	#DIV/0!	0.142857	0.0972222	-0.363636	#DIV/0!	1	1	1	1	1	1	1	1	1	1	#DIV/0!	0.0814815	#DIV/0!	0.0666667	#DIV/0!	0.2	0.0714286	0.240741	0.133333	0.133333	1	1	1	1	1	1	1	1	1	1	0.37037	#DIV/0!	0.153846	0.155844	#DIV/0!	0.2
57	2000-01-01	1899-12-31 12:00:00	72	0.197802	#DIV/0!	-0.235714	-0.2	#DIV/0!	#DIV/0!	0.142857	0.0972222	-0.363636	#DIV/0!	1	1	1	1	1	1	1	1	1	1	#DIV/0!	0.0814815	#DIV/0!	0.0666667	#DIV/0!	0.2	0.0714286	0.240741	0.133333	0.133333	1	1	1	1	1	1	1	1	1	1	0.37037	#DIV/0!	0.153846	0.155844	#DIV/0!	0.2
58	2000-01-01	1899-12-31 12:00:00	72	0.197802	#DIV/0!	-0.235714	-0.2	#DIV/0!	#DIV/0!	0.142857	0.0972222	-0.363636	#DIV/0!	1	1	1	1	1	1	1	1	1	1	#DIV/0!	0.0814815	#DIV/0!	0.0666667	#DIV/0!	0.2	0.0714286	0.240741	0.133333	0.133333	1	1	1	1	1	1	1	1	1	1	0.37037	#DIV/0!	0.153846	0.155844	#DIV/0!	0.2
59	2000-01-01	1899-12-31 12:00:00	72	0.197802	#DIV/0!	-0.235714	-0.2	#DIV/0!	#DIV/0!	0.142857	0.0972222	-0.363636	#DIV/0!	1	1	1	1	1	1	1	1	1	1	#DIV/0!	0.0814815	#DIV/0!	0.0666667	#DIV/0!	0.2	0.0714286	0.240741	0.133333	0.133333	1	1	1	1	1	1	1	1	1	1	0.37037	#DIV/0!	0.153846	0.155844	#DIV/0!	0.2
60	2000-01-01	1899-12-31 12:00:00	72	0.197802	#DIV/0!	-0.235714	-0.2	#DIV/0!	#DIV/0!	0.142857	0.0972222	-0.363636	#DIV/0!	1	1	1	1	1	1	1	1	1	1	#DIV/0!	0.0814815	#DIV/0!	0.0666667	#DIV/0!	0.2	0.0714286	0.240741	0.133333	0.133333	1	1	1	1	1	1	1	1	1	1	0.37037	#DIV/0!	0.153846	0.155844	#DIV/0!	0.2
61	2000-01-01	1899-12-31 12:00:00	72	0.197802	#DIV/0!	-0.235714	-0.2	#DIV/0!	#DIV/0!	0.142857	0.0972222	-0.363636	#DIV/0!	1	1	1	1	1	1	1	1	1	1	#DIV/0!	0.0814815	#DIV/0!	0.0666667	#DIV/0!	0.2	0.0714286	0.240741	0.133333	0.133333	1	1	1	1	1	1	1	1	1	1	0.37037	#DIV/0!	0.153846	0.155844	#DIV/0!	0.2
62	2000-01-01	1899-12-31 12:00:00	72	0.197802	#DIV/0!	-0.235714	-0.2	#DIV/0!	#DIV/0!	0.142857	0.0972222	-0.363636	#DIV/0!	1	1	1	1	1	1	1	1	1	1	#DIV/0!	0.0814815	#DIV/0!	0.0666667	#DIV/0!	0.2	0.0714286	0.240741	0.133333	0.133333	1	1	1	1	1	1	1	1	1	1	0.37037	#DIV/0!	0.153846	0.155844	#DIV/0!	0.2
63	2000-01-01	1899-12-31 12:00:00	72	0.197802	#DIV/0!	-0.235714	-0.2	#DIV/0!	#DIV/0!	0.142857	0.0972222	-0.363636	#DIV/0!	1	1	1	1	1	1	1	1	1	1	#DIV/0!	0.0814815	#DIV/0!	0.0666667	#DIV/0!	0.2	0.0714286	0.240741	0.133333	0.133333	1	1	1	1	1	1	1	1	1	1	0.37037	#DIV/0!	0.153846	0.155844	#DIV/0!	0.2
64	2000-01-01	1899-12-31 12:00:00	72	0.197802	#DIV/0!	-0.235714	-0.2	#DIV/0!	#DIV/0!	0.142857	0.0972222	-0.363636	#DIV/0!	1	1	1	1	1	1	1	1	1	1	#DIV/0!	0.0814815	#DIV/0!	0.0666667	#DIV/0!	0.2	0.0714286	0.240741	0.133333	0.133333	1	1	1	1	1	1	1	1	1	1	0.37037	#DIV/0!	0.153846	0.155844	#DIV/0!	0.2
65	2000-01-01	1899-12-31 12:00:00	72	0.197802	#DIV/0!	-0.235714	-0.2	#DIV/0!	#DIV/0!	0.142857	0.0972222	-0.363636	#DIV/0!	1	1	1	1	1	1	1	1	1	1	#DIV/0!	0.0814815	#DIV/0!	0.0666667	#DIV/0!	0.2	0.0714286	0.240741	0.133333	0.133333	1	1	1	1	1	1	1	1	1	1	0.37037	#DIV/0!	0.153846	0.155844	#DIV/0!	0.2
66	2000-01-01	1899-12-31 12:00:00	72	0.197802	#DIV/0!	-0.235714	-0.2	#DIV/0!	#DIV/0!	0.142857	0.0972222	-0.363636	#DIV/0!	1	1	1	1	1	1	1	1	1	1	#DIV/0!	0.0814815	#DIV/0!	0.0666667	#DIV/0!	0.2	0.0714286	0.240741	0.133333	0.133333	1	1	1	1	1	1	1	1	1	1	0.37037	#DIV/0!	0.153846	0.155844	#DIV/0!	0.2
67	2000-01-01	1899-12-31 12:00:00	72	0.197802	#DIV/0!	-0.235714	-0.2	#DIV/0!	#DIV/0!	0.142857	0.0972222	-0.363636	#DIV/0!	1	1	1	1	1	1	1	1	1	1	#DIV/0!	0.0814815	#DIV/0!	0.0666667	#DIV/0!	0.2	0.0714286	0.240741	0.133333	0.133333	1	1	1	1	1	1	1	1	1	1	0.37037	#DIV/0!	0.153846	0.155844	#DIV/0!	0.2
68	2000-01-01	1899-12-31 12:00:00	72	0.197802	#DIV/0!	-0.235714	-0.2	#DIV/0!	#DIV/0!	0.142857	0.0972222	-0.363636	#DIV/0!	1	1	1	1	1	1	1	1	1	1	#DIV/0!	0.0814815	#DIV/0!	0.0666667	#DIV/0!	0.2	0.0714286	0.240741	0.133333	0.133333	1	1	1	1	1	1	1	1	1	1	0.37037	#DIV/0!	0.153846	0.155844	#DIV/0!	0.2
69	2000-01-01	1899-12-31 12:00:00	72	0.197802	#DIV/0!	-0.235714	-0.2	#DIV/0!	#DIV/0!	0.142857	0.0972222	-0.363636	#DIV/0!	1	1	1	1	1	1	1	1	1	1	#DIV/0!	0.0814815	#DIV/0!	0.0666667	#DIV/0!	0.2	0.0714286	0.240741	0.133333	0.133333	1	1	1	1	1	1	1	1	1	1	0.37037	#DIV/0!	0.153846	0.155844	#DIV/0!	0.2
70	2000-01-01	1899-12-31 12:00:00	72	0.197802	#DIV/0!	-0.235714	-0.2	#DIV/0!	#DIV/0!	0.142857	0.0972222	-0.363636	#DIV/0!	1	1	1	1	1	1	1	1	1	1	#DIV/0!	0.0814815	#DIV/0!	0.0666667	#DIV/0!	0.2	0.0714286	0.240741	0.133333	0.133333	1	1	1	1	1	1	1	1	1	1	0.37037	#DIV/0!	0.153846	0.155844	#DIV/0!	0.2
71	2000-01-01	1899-12-31 12:00:00	72	0.197802	#DIV/0!	-0.235714	-0.2	#DIV/0!	#DIV/0!	0.142857	0.0972222	-0.363636	#DIV/0!	1	1	1	1	1	1	1	1	1	1	#DIV/0!	0.0814815	#DIV/0!	0.0666667	#DIV/0!	0.2	0.0714286	0.240741	0.133333	0.133333	1	1	1	1	1	1	1	1	1	1	0.37037	#DIV/0!	0.153846	0.155844	#DIV/0!	0.2
72	2000-01-01	1899-12-31 12:00:00	72	0.197802	#DIV/0!	-0.235714	-0.2	#DIV/0!	#DIV/0!	0.142857	0.0972222	-0.363636	#DIV/0!	1	1	1	1	1	1	1	1	1	1	#DIV/0!	0.0814815	#DIV/0!	0.0666667	#DIV/0!	0.2	0.0714286	0.240741	0.133333	0.133333	1	1	1	1	1	1	1	1	1	1	0.37037	#DIV/0!	0.153846	0.155844	#DIV/0!	0.2
73	2000-01-01	1899-12-31 12:00:00	72	0.197802	#DIV/0!	-0.235714	-0.2	#DIV/0!	#DIV/0!	0.142857	0.0972222	-0.363636	#DIV/0!	1	1	1	1	1	1	1	1	1	1	#DIV/0!	0.0814815	#DIV/0!	0.0666667	#DIV/0!	0.2	0.0714286	0.240741	0.133333	0.133333	1	1	1	1	1	1	1	1	1	1	0.37037	#DIV/0!	0.153846	0.155844	#DIV/0!	0.2
74	2000-01-01	1899-12-31 12:00:00	72	0.197802	#DIV/0!	-0.235714	-0.2	#DIV/0!	#DIV/0!	0.142857	0.0972222	-0.363636	#DIV/0!	1	1	1	1	1	1	1	1	1	1	#DIV/0!	0.0814815	#DIV/0!	0.0666667	#DIV/0!	0.2	0.0714286	0.240741	0.133333	0.133333	1	1	1	1	1	1	1	1	1	1	0.37037	#DIV/0!	0.153846	0.155844	#DIV/0!	0.2
75	2000-01-01	1899-12-31 12:00:00	72	0.197802	#DIV/0!	-0.235714	-0.2	#DIV/0!	#DIV/0!	0.142857	0.0972222	-0.363636	#DIV/0!	1	1	1	1	1	1	1	1	1	1	#DIV/0!	0.0814815	#DIV/0!	0.0666667	#DIV/0!	0.2	0.0714286	0.240741	0.133333	0.133333	1	1	1	1	1	1	1	1	1	1	0.37037	#DIV/0!	0.153846	0.155844	#DIV/0!	0.2
[truncated: 154 more columns]

## Sheet: log rank data
deaths
log-rank test data												at risk											Expected values
day	PBS RU+(G4C2)36	0.3 mg/ml RU- (G4C2)36	0.03 mh/ml RU+ (G4C2)36	PBS RU-(G4C2)36	0.3mg/ml (G4C2)36 Ru+	0	(G4C2)36 RU+ 3mg/ml	0.03mg/ml (G4C23)36 RU-	-	-		PBS RU+(G4C2)36	0.3 mg/ml RU- (G4C2)36	0.03 mh/ml RU+ (G4C2)36	PBS RU-(G4C2)36	0.3mg/ml (G4C2)36 Ru+	0	(G4C2)36 RU+ 3mg/ml	0.03mg/ml (G4C23)36 RU-	-	-		PBS RU+(G4C2)36									0.3 mg/ml RU- (G4C2)36								0.03 mh/ml RU+ (G4C2)36							PBS RU-(G4C2)36
sum	157	140	93	78	156	#REF!	105	141	0	0													0.3 mg/ml RU- (G4C2)36	0.03 mh/ml RU+ (G4C2)36	PBS RU-(G4C2)36	0.3mg/ml (G4C2)36 Ru+	0	(G4C2)36 RU+ 3mg/ml	0.03mg/ml (G4C23)36 RU-	-	-	0.03 mh/ml RU+ (G4C2)36	PBS RU-(G4C2)36	0.3mg/ml (G4C2)36 Ru+	0	(G4C2)36 RU+ 3mg/ml	0.03mg/ml (G4C23)36 RU-	-	-	PBS RU-(G4C2)36	0.3mg/ml (G4C2)36 Ru+	0	(G4C2)36 RU+ 3mg/ml	0.03mg/ml (G4C23)36 RU-	-	-	0.3mg/ml (G4C2)36 Ru+	0	(G4C2)36 RU+ 3mg/ml
0	0	0	0	0	0	0	0	0	0	0		157	140	93	78	156	#REF!	105	141	0	0		0	0	0	0	#REF!	0	0	0	0	0	0	0	#REF!	0	0	0	0	0	0	#REF!	0	0	0	0	0	#REF!	0
2	0	0	0	0	0	0	51	0	0	0		157	140	93	78	156	#REF!	105	141	0	0		0	0	0	0	#REF!	30.5611	0	0	0	0	0	0	#REF!	29.1429	0	0	0	0	0	#REF!	23.9545	0	0	0	0	#REF!	21.7377
4	0	0	0	0	0	0	30	0	0	0		147	139	89	72	145	#REF!	54	133	0	0		0	0	0	0	#REF!	21.9403	0	0	0	0	0	0	#REF!	21.6062	0	0	0	0	0	#REF!	18.6713	0	0	0	0	#REF!	17.1429
7	3	0	1	0	4	1	24	1	0	0		147	139	89	72	145	#REF!	24	133	0	0		1.54196	2.49153	2.0137	3.52397	#REF!	23.2105	2.1	3	3	0.609649	0	1.95775	#REF!	20.4663	0.511029	0	0	0.552795	1.90171	#REF!	19.6903	0.801802	1	1	1.32719	#REF!	18
9	0	0	0	1	0	0	0	0	0	0		144	139	88	72	141	#REF!	0	132	0	0		0	0	0.666667	0	#REF!	0	0	0	0	0	0.658768	0	#REF!	0	0	0	0	0.55	0	#REF!	0	0	0	0	0.338028	#REF!	1
11	6	1	6	0	5	0	0	0	0	0		134	139	87	70	138	#REF!	0	129	0	0		3.4359	7.27602	3.94118	5.41912	#REF!	6	3.05703	6	6	4.30531	0.665072	3.01083	#REF!	1	0.518657	1	1	3.32484	4.25333	#REF!	6	2.41667	6	6	1.68269	#REF!	0
14	8	1	3	0	6	0	0	0	0	0		128	138	78	70	133	#REF!	0	129	0	0		4.33083	6.83495	5.17172	6.8659	#REF!	8	3.98444	8	8	2.55556	0.663462	3.56458	#REF!	1	0.516854	1	1	1.58108	3.32701	#REF!	3	1.13043	3	3	2.06897	#REF!	0
16	6	2	0	0	4	1	0	1	0	0		119	137	75	70	127	#REF!	0	129	0	0		3.71875	3.68041	3.77778	4.8374	#REF!	6	3.35887	6	6	1.29245	1.32367	3.11364	#REF!	2	1.54511	2	2	0	1.48515	#REF!	0	0.367647	0	0	1.42132	#REF!	0
18	6	7	0	0	5	0	0	0	0	0		113	135	75	70	123	#REF!	0	128	0	0		5.92339	3.60638	3.70492	5.26695	#REF!	6	2.81328	6	6	4.5	4.60976	6.27907	#REF!	7	3.59316	7	7	0	1.89394	#REF!	0	0	0	0	1.81347	#REF!	0
21	37	17	24	2	47	1	0	1	0	0		102	128	75	69	118	#REF!	0	128	0	0		23.9478	35.1525	23.2632	38.9455	#REF!	37	16.8522	37	37	25.8522	12.3452	33.3008	#REF!	17	9	17	17	13.5417	27.5907	#REF!	24	9.23645	24	24	18.0802	#REF!	2
23	21	5	10	1	6	0	0	0	0	0		61	109	49	67	71	#REF!	0	126	0	0		9.32941	17.1909	10.4844	12.4773	#REF!	21	6.85027	21	21	10.3481	3.71591	6.66111	#REF!	5	2.31915	5	5	4.64655	6.53333	#REF!	10	2.8	10	10	3.39855	#REF!	1
25	9	2	6	0	9	0	0	0	0	0		39	104	39	66	65	#REF!	0	126	0	0		3	7.5	3.34286	6.75	#REF!	9	2.12727	9	9	5.81818	1.22353	6.76923	#REF!	2	0.904348	2	2	2.22857	5.625	#REF!	6	1.41818	6	6	4.53435	#REF!	0
28	11	3	5	0	20	1	0	1	0	0		30	102	33	66	56	#REF!	0	126	0	0		3.18182	7.61905	3.4375	10.814	#REF!	11	2.30769	11	11	6.04444	1.82143	14.8481	#REF!	3	1.78947	3	3	1.66667	9.26966	#REF!	5	1.24528	5	5	10.8197	#REF!	0
30	3	2	5	0	12	0	0	0	0	0		19	98	28	66	36	#REF!	0	125	0	0		0.811966	3.23404	0.670588	5.18182	#REF!	3	0.395833	3	3	5.44444	1.19512	10.2388	#REF!	2	0.878924	2	2	1.48936	7.4375	#REF!	5	0.915033	5	5	7.76471	#REF!	0
33	4	4	13	1	5	1	0	1	0	0		16	96	23	66	24	#REF!	0	125	0	0		1.14286	6.97436	0.97561	3.6	#REF!	4	0.567376	4	4	13.7143	2.96296	7.2	#REF!	4	2.17195	4	4	3.61798	8.80851	#REF!	13	2.17568	13	13	4.4	#REF!	1
34	4	1	2	0	2	0	0	0	0	0		12	92	10	65	19	#REF!	0	123	0	0		0.576923	3.27273	0.623377	2.32258	#REF!	4	0.355556	4	4	2.70588	0.585987	2.48649	#REF!	1	0.427907	1	1	0.266667	1.37931	#REF!	2	0.150376	2	2	1.54762	#REF!	0
37	2	1	0	0	1	0	0	0	0	0		8	91	8	65	17	#REF!	0	123	0	0		0.242424	1	0.219178	0.96	#REF!	2	0.122137	2	2	0.919192	0.583333	1.68519	#REF!	1	0.425234	1	1	0	0.32	#REF!	0	0	0	0	0.792683	#REF!	0
39	0	1	0	0	2	0	0	0	0	0		6	90	8	65	16	#REF!	0	123	0	0		0.0625	0	0	0.545455	#REF!	0	0	0	0	0.918367	0.580645	2.54717	#REF!	1	0.422535	1	1	0	0.666667	#REF!	0	0	0	0	1.60494	#REF!	0
42	3	0	7	4	10	3	0	1	0	0		6	89	8	65	14	#REF!	0	123	0	0		0.189474	4.28571	0.591549	3.9	#REF!	3	0.186047	3	3	6.42268	2.31169	8.64078	#REF!	0	0.419811	0	0	1.20548	6.18182	#REF!	7	0.48855	7	7	11.519	#REF!	4
44	0	1	0	0	0	3	0	4	0	0		3	89	1	61	4	#REF!	0	122	0	0		0.0326087	0	0	0	#REF!	0	0.096	0	0	0.988889	0.593333	0.956989	#REF!	1	2.109	1	1	0	0	#REF!	0	0.0325203	0	0	0	#REF!	0
46	2	3	1	0	2	1	0	1	0	0		3	88	1	61	4	#REF!	0	118	0	0		0.164835	2.25	0.09375	1.71429	#REF!	2	0.0743802	2	2	3.95506	1.77181	4.78261	#REF!	3	1.70874	3	3	0.016129	0.6	#REF!	1	0.0168067	1	1	1.87692	#REF!	0
49	1	31	0	10	2	45	0	45	0	0		1	85	0	61	2	#REF!	0	117	0	0		0.372093	1	0.177419	1	#REF!	1	0.389831	1	1	31	23.8699	32.2414	#REF!	31	31.9802	31	31	0	0	#REF!	0	0	0	0	11.619	#REF!	10
51	0	4	0	4	0	16	0	16	0	0		0	53	0	51	0	#REF!	0	72	0	0		0	0	0	0	#REF!	0	0	0	0	4	4.07692	4	#REF!	4	8.48	4	4	0	0	#REF!	0	0	0	0	4	#REF!	4
53	0	2	0	1	0	3	0	3	0	0		0	49	0	47	0	#REF!	0	56	0	0		0	0	0	0	#REF!	0	0	0	0	2	1.53125	2	#REF!	2	2.33333	2	2	0	0	#REF!	0	0	0	0	1	#REF!	1
56	0	22	0	31	0	16	0	16	0	0		0	47	0	46	0	#REF!	0	53	0	0		0	0	0	0	#REF!	0	0	0	0	22	26.7849	22	#REF!	22	17.86	22	22	0	0	#REF!	0	0	0	0	31	#REF!	31
58	0	10	0	1	0	11	0	11	0	0		0	25	0	15	0	#REF!	0	37	0	0		0	0	0	0	#REF!	0	0	0	0	10	6.875	10	#REF!	10	8.46774	10	10	0	0	#REF!	0	0	0	0	1	#REF!	1
60	0	4	0	1	0	5	0	6	0	0		0	13	0	14	0	#REF!	0	26	0	0		0	0	0	0	#REF!	0	0	0	0	4	2.40741	4	#REF!	4	3.33333	4	4	0	0	#REF!	0	0	0	0	1	#REF!	1
63	0	2	0	6	0	11	0	13	0	0		0	9	0	13	0	#REF!	0	20	0	0		0	0	0	0	#REF!	0	0	0	0	2	3.27273	2	#REF!	2	4.65517	2	2	0	0	#REF!	0	0	0	0	6	#REF!	6
65	0	6	0	1	0	6	0	6	0	0		0	7	0	7	0	#REF!	0	7	0	0		0	0	0	0	#REF!	0	0	0	0	6	3.5	6	#REF!	6	6	6	6	0	0	#REF!	0	0	0	0	1	#REF!	1
67	0	1	0	0	0	1	0	1	0	0		0	1	0	6	0	#REF!	0	1	0	0		0	0	0	0	#REF!	0	0	0	0	1	0.142857	1	#REF!	1	1	1	1	0	0	#REF!	0	0	0	0	0	#REF!	0
70	0	0	0	2	0	2	0	0	0	0		0	0	0	6	0	#REF!	0	0	0	0		0	0	0	0	#REF!	0	0	0	0	0	0	0	#REF!	0	0	0	0	0	0	#REF!	0	0	0	0	2	#REF!	2
72	0	0	0	4	0	4	0	0	0	0		0	0	0	4	0	#REF!	0	0	0	0		0	0	0	0	#REF!	0	0	0	0	0	0	0	#REF!	0	0	0	0	0	0	#REF!	0	0	0	0	4	#REF!	4
72	0	0	0	0	0	0	0	0	0	0		0	0	0	0	0	#REF!	0	0	0	0		0	0	0	0	#REF!	0	0	0	0	0	0	0	#REF!	0	0	0	0	0	0	#REF!	0	0	0	0	0	#REF!	0
72	0	0	0	0	0	0	0	0	0	0		0	0	0	0	0	#REF!	0	0	0	0		0	0	0	0	#REF!	0	0	0	0	0	0	0	#REF!	0	0	0	0	0	0	#REF!	0	0	0	0	0	#REF!	0
72	0	0	0	0	0	0	0	0	0	0		0	0	0	0	0	#REF!	0	0	0	0		0	0	0	0	#REF!	0	0	0	0	0	0	0	#REF!	0	0	0	0	0	0	#REF!	0	0	0	0	0	#REF!	0
72	0	0	0	0	0	0	0	0	0	0		0	0	0	0	0	#REF!	0	0	0	0		0	0	0	0	#REF!	0	0	0	0	0	0	0	#REF!	0	0	0	0	0	0	#REF!	0	0	0	0	0	#REF!	0
72	0	0	0	0	0	0	0	0	0	0		0	0	0	0	0	#REF!	0	0	0	0		0	0	0	0	#REF!	0	0	0	0	0	0	0	#REF!	0	0	0	0	0	0	#REF!	0	0	0	0	0	#REF!	0
72	0	0	0	0	0	0	0	0	0	0		0	0	0	0	0	#REF!	0	0	0	0		0	0	0	0	#REF!	0	0	0	0	0	0	0	#REF!	0	0	0	0	0	0	#REF!	0	0	0	0	0	#REF!	0
72	0	0	0	0	0	0	0	0	0	0		0	0	0	0	0	#REF!	0	0	0	0		0	0	0	0	#REF!	0	0	0	0	0	0	0	#REF!	0	0	0	0	0	0	#REF!	0	0	0	0	0	#REF!	0
72	0	0	0	0	0	0	0	0	0	0		0	0	0	0	0	#REF!	0	0	0	0		0	0	0	0	#REF!	0	0	0	0	0	0	0	#REF!	0	0	0	0	0	0	#REF!	0	0	0	0	0	#REF!	0
72	0	0	0	0	0	0	0	0	0	0		0	0	0	0	0	#REF!	0	0	0	0		0	0	0	0	#REF!	0	0	0	0	0	0	0	#REF!	0	0	0	0	0	0	#REF!	0	0	0	0	0	#REF!	0
72	0	0	0	0	0	0	0	0	0	0		0	0	0	0	0	#REF!	0	0	0	0		0	0	0	0	#REF!	0	0	0	0	0	0	0	#REF!	0	0	0	0	0	0	#REF!	0	0	0	0	0	#REF!	0
72	0	0	0	0	0	0	0	0	0	0		0	0	0	0	0	#REF!	0	0	0	0		0	0	0	0	#REF!	0	0	0	0	0	0	0	#REF!	0	0	0	0	0	0	#REF!	0	0	0	0	0	#REF!	0
72	0	0	0	0	0	0	0	0	0	0		0	0	0	0	0	#REF!	0	0	0	0		0	0	0	0	#REF!	0	0	0	0	0	0	0	#REF!	0	0	0	0	0	0	#REF!	0	0	0	0	0	#REF!	0
72	0	0	0	0	0	0	0	0	0	0		0	0	0	0	0	#REF!	0	0	0	0		0	0	0	0	#REF!	0	0	0	0	0	0	0	#REF!	0	0	0	0	0	0	#REF!	0	0	0	0	0	#REF!	0
72	0	0	0	0	0	0	0	0	0	0		0	0	0	0	0	#REF!	0	0	0	0		0	0	0	0	#REF!	0	0	0	0	0	0	0	#REF!	0	0	0	0	0	0	#REF!	0	0	0	0	0	#REF!	0
72	0	0	0	0	0	0	0	0	0	0		0	0	0	0	0	#REF!	0	0	0	0		0	0	0	0	#REF!	0	0	0	0	0	0	0	#REF!	0	0	0	0	0	0	#REF!	0	0	0	0	0	#REF!	0
72	0	0	0	0	0	0	0	0	0	0		0	0	0	0	0	#REF!	0	0	0	0		0	0	0	0	#REF!	0	0	0	0	0	0	0	#REF!	0	0	0	0	0	0	#REF!	0	0	0	0	0	#REF!	0
72	0	0	0	0	0	0	0	0	0	0		0	0	0	0	0	#REF!	0	0	0	0		0	0	0	0	#REF!	0	0	0	0	0	0	0	#REF!	0	0	0	0	0	0	#REF!	0	0	0	0	0	#REF!	0
72	0	0	0	0	0	0	0	0	0	0		0	0	0	0	0	#REF!	0	0	0	0		0	0	0	0	#REF!	0	0	0	0	0	0	0	#REF!	0	0	0	0	0	0	#REF!	0	0	0	0	0	#REF!	0
72	0	0	0	0	0	0	0	0	0	0		0	0	0	0	0	#REF!	0	0	0	0		0	0	0	0	#REF!	0	0	0	0	0	0	0	#REF!	0	0	0	0	0	0	#REF!	0	0	0	0	0	#REF!	0
72	0	0	0	0	0	0	0	0	0	0		0	0	0	0	0	#REF!	0	0	0	0		0	0	0	0	#REF!	0	0	0	0	0	0	0	#REF!	0	0	0	0	0	0	#REF!	0	0	0	0	0	#REF!	0
72	0	0	0	0	0	0	0	0	0	0		0	0	0	0	0	#REF!	0	0	0	0		0	0	0	0	#REF!	0	0	0	0	0	0	0	#REF!	0	0	0	0	0	0	#REF!	0	0	0	0	0	#REF!	0
72	0	0	0	0	0	0	0	0	0	0		0	0	0	0	0	#REF!	0	0	0	0		0	0	0	0	#REF!	0	0	0	0	0	0	0	#REF!	0	0	0	0	0	0	#REF!	0	0	0	0	0	#REF!	0
72	0	0	0	0	0	0	0	0	0	0		0	0	0	0	0	#REF!	0	0	0	0		0	0	0	0	#REF!	0	0	0	0	0	0	0	#REF!	0	0	0	0	0	0	#REF!	0	0	0	0	0	#REF!	0
72	0	0	0	0	0	0	0	0	0	0		0	0	0	0	0	#REF!	0	0	0	0		0	0	0	0	#REF!	0	0	0	0	0	0	0	#REF!	0	0	0	0	0	0	#REF!	0	0	0	0	0	#REF!	0
72	0	0	0	0	0	0	0	0	0	0		0	0	0	0	0	#REF!	0	0	0	0		0	0	0	0	#REF!	0	0	0	0	0	0	0	#REF!	0	0	0	0	0	0	#REF!	0	0	0	0	0	#REF!	0
72	0	0	0	0	0	0	0	0	0	0		0	0	0	0	0	#REF!	0	0	0	0		0	0	0	0	#REF!	0	0	0	0	0	0	0	#REF!	0	0	0	0	0	0	#REF!	0	0	0	0	0	#REF!	0
72	0	0	0	0	0	0	0	0	0	0		0	0	0	0	0	#REF!	0	0	0	0		0	0	0	0	#REF!	0	0	0	0	0	0	0	#REF!	0	0	0	0	0	0	#REF!	0	0	0	0	0	#REF!	0
72	0	0	0	0	0	0	0	0	0	0		0	0	0	0	0	#REF!	0	0	0	0		0	0	0	0	#REF!	0	0	0	0	0	0	0	#REF!	0	0	0	0	0	0	#REF!	0	0	0	0	0	#REF!	0
72	0	0	0	0	0	0	0	0	0	0		0	0	0	0	0	#REF!	0	0	0	0		0	0	0	0	#REF!	0	0	0	0	0	0	0	#REF!	0	0	0	0	0	0	#REF!	0	0	0	0	0	#REF!	0
72	0	0	0	0	0	0	0	0	0	0		0	0	0	0	0	#REF!	0	0	0	0		0	0	0	0	#REF!	0	0	0	0	0	0	0	#REF!	0	0	0	0	0	0	#REF!	0	0	0	0	0	#REF!	0
72	0	0	0	0	0	0	0	0	0	0		0	0	0	0	0	#REF!	0	0	0	0		0	0	0	0	#REF!	0	0	0	0	0	0	0	#REF!	0	0	0	0	0	0	#REF!	0	0	0	0	0	#REF!	0
72	0	0	0	0	0	0	0	0	0	0		0	0	0	0	0	#REF!	0	0	0	0		0	0	0	0	#REF!	0	0	0	0	0	0	0	#REF!	0	0	0	0	0	0	#REF!	0	0	0	0	0	#REF!	0
72	0	0	0	0	0	0	0	0	0	0		0	0	0	0	0	#REF!	0	0	0	0		0	0	0	0	#REF!	0	0	0	0	0	0	0	#REF!	0	0	0	0	0	0	#REF!	0	0	0	0	0	#REF!	0
72	0	0	0	0	0	0	0	0	0	0		0	0	0	0	0	#REF!	0	0	0	0		0	0	0	0	#REF!	0	0	0	0	0	0	0	#REF!	0	0	0	0	0	0	#REF!	0	0	0	0	0	#REF!	0
72	0	0	0	0	0	0	0	0	0	0		0	0	0	0	0	#REF!	0	0	0	0		0	0	0	0	#REF!	0	0	0	0	0	0	0	#REF!	0	0	0	0	0	0	#REF!	0	0	0	0	0	#REF!	0
72	0	0	0	0	0	0	0	0	0	0		0	0	0	0	0	#REF!	0	0	0	0		0	0	0	0	#REF!	0	0	0	0	0	0	0	#REF!	0	0	0	0	0	0	#REF!	0	0	0	0	0	#REF!	0
72	0	0	0	0	0	0	0	0	0	0		0	0	0	0	0	#REF!	0	0	0	0		0	0	0	0	#REF!	0	0	0	0	0	0	0	#REF!	0	0	0	0	0	0	#REF!	0	0	0	0	0	#REF!	0
72	0	0	0	0	0	0	0	0	0	0		0	0	0	0	0	#REF!	0	0	0	0		0	0	0	0	#REF!	0	0	0	0	0	0	0	#REF!	0	0	0	0	0	0	#REF!	0	0	0	0	0	#REF!	0
72	0	0	0	0	0	0	0	0	0	0		0	0	0	0	0	#REF!	0	0	0	0		0	0	0	0	#REF!	0	0	0	0	0	0	0	#REF!	0	0	0	0	0	0	#REF!	0	0	0	0	0	#REF!	0
72	0	0	0	0	0	0	0	0	0	0		0	0	0	0	0	#REF!	0	0	0	0		0	0	0	0	#REF!	0	0	0	0	0	0	0	#REF!	0	0	0	0	0	0	#REF!	0	0	0	0	0	#REF!	0
72	0	0	0	0	0	0	0	0	0	0		0	0	0	0	0	#REF!	0	0	0	0		0	0	0	0	#REF!	0	0	0	0	0	0	0	#REF!	0	0	0	0	0	0	#REF!	0	0	0	0	0	#REF!	0
72	0	0	0	0	0	0	0	0	0	0		0	0	0	0	0	#REF!	0	0	0	0		0	0	0	0	#REF!	0	0	0	0	0	0	0	#REF!	0	0	0	0	0	0	#REF!	0	0	0	0	0	#REF!	0
72	0	0	0	0	0	0	0	0	0	0		0	0	0	0	0	#REF!	0	0	0	0		0	0	0	0	#REF!	0	0	0	0	0	0	0	#REF!	0	0	0	0	0	0	#REF!	0	0	0	0	0	#REF!	0
72	0	0	0	0	0	0	0	0	0	0		0	0	0	0	0	#REF!	0	0	0	0		0	0	0	0	#REF!	0	0	0	0	0	0	0	#REF!	0	0	0	0	0	0	#REF!	0	0	0	0	0	#REF!	0
sum	126	133	83	70	142	132	105	128	0	0													62.0056	113.369	63.1553	114.124	#REF!	198.712	45.6382	126	126	178.395	110.073	201.285	#REF!	204.215	113.372	133	133	34.6878	87.2736	#REF!	144.316	23.1954	83	83	137.609	#REF!	126.881
censors
day	PBS RU+(G4C2)36	0.3 mg/ml RU- (G4C2)36	0.03 mh/ml RU+ (G4C2)36	PBS RU-(G4C2)36	0.3mg/ml (G4C2)36 Ru+	0	(G4C2)36 RU+ 3mg/ml	0.03mg/ml (G4C23)36 RU-	-	-
0	0	0	0	0	0	0	0	0	0	0
2	10	1	4	6	11	#REF!	0	8	0	0
4	0	0	0	0	0	0	0	0	0	0
7	0	0	0	0	0	0	0	0	0	0
9	10	0	1	1	3	3	0	3	0	0
11	0	0	3	0	0	0	0	0	0	0
14	1	0	0	0	0	0	0	0	0	0
16	0	0	0	0	0	0	0	0	0	0
18	5	0	0	1	0	0	0	0	0	0
21	4	2	2	0	0	1	0	1	0	0
23	1	0	0	0	0	0	0	0	0	0
25	0	0	0	0	0	0	0	0	0	0
28	0	1	0	0	0	0	0	0	0	0
30	0	0	0	0	0	0	0	0	0	0
33	0	0	0	0	0	1	0	1	0	0
34	0	0	0	0	0	0	0	0	0	0
37	0	0	0	0	0	0	0	0	0	0
39	0	0	0	0	0	0	0	0	0	0
42	0	0	0	0	0	0	0	0	0	0
44	0	0	0	0	0	0	0	0	0	0
46	0	0	0	0	0	0	0	0	0	0
49	0	1	0	0	0	0	0	0	0	0
51	0	0	0	0	0	0	0	0	0	0
53	0	0	0	0	0	0	0	0	0	0
56	0	0	0	0	0	0	0	0	0	0
58	0	2	0	0	0	0	0	0	0	0
60	0	0	0	0	0	0	0	0	0	0
63	0	0	0	0	0	0	0	0	0	0
65	0	0	0	0	0	0	0	0	0	0
67	0	0	0	0	0	0	0	0	0	0
70	0	0	0	0	0	0	0	0	0	0
72	0	0	0	0	0	0	0	0	0	0
72	0	0	0	0	0	0	0	0	0	0
72	0	0	0	0	0	0	0	0	0	0
72	0	0	0	0	0	0	0	0	0	0
72	0	0	0	0	0	0	0	0	0	0
72	0	0	0	0	0	0	0	0	0	0
72	0	0	0	0	0	0	0	0	0	0
72	0	0	0	0	0	0	0	0	0	0
72	0	0	0	0	0	0	0	0	0	0
72	0	0	0	0	0	0	0	0	0	0
72	0	0	0	0	0	0	0	0	0	0
72	0	0	0	0	0	0	0	0	0	0
72	0	0	0	0	0	0	0	0	0	0
72	0	0	0	0	0	0	0	0	0	0
72	0	0	0	0	0	0	0	0	0	0
72	0	0	0	0	0	0	0	0	0	0
72	0	0	0	0	0	0	0	0	0	0
72	0	0	0	0	0	0	0	0	0	0
72	0	0	0	0	0	0	0	0	0	0
72	0	0	0	0	0	0	0	0	0	0
72	0	0	0	0	0	0	0	0	0	0
72	0	0	0	0	0	0	0	0	0	0
72	0	0	0	0	0	0	0	0	0	0
72	0	0	0	0	0	0	0	0	0	0
72	0	0	0	0	0	0	0	0	0	0
72	0	0	0	0	0	0	0	0	0	0
72	0	0	0	0	0	0	0	0	0	0
72	0	0	0	0	0	0	0	0	0	0
72	0	0	0	0	0	0	0	0	0	0
72	0	0	0	0	0	0	0	0	0	0
72	0	0	0	0	0	0	0	0	0	0
72	0	0	0	0	0	0	0	0	0	0
72	0	0	0	0	0	0	0	0	0	0
72	0	0	0	0	0	0	0	0	0	0
72	0	0	0	0	0	0	0	0	0	0
72	0	0	0	0	0	0	0	0	0	0
72	0	0	0	0	0	0	0	0	0	0
72	0	0	0	0	0	0	0	0	0	0
72	0	0	0	0	0	0	0	0	0	0
72	0	0	0	0	0	0	0	0	0	0
72	0	0	0	0	0	0	0	0	0	0
72	0	0	0	0	0	0	0	0	0	0
72	0	0	0	0	0	0	0	0	0	0
72	0	0	0	0	0	0	0	0	0	0
72	0	0	0	0	0	0	0	0	0	0
[truncated: 63 more columns]

## Sheet: mort data
					deaths
																Nx	number of survivors											proportion of survivors												Ux	negative log of proportion of daily survivors
	count			day	PBS RU+(G4C2)36	0.3 mg/ml RU- (G4C2)36	0.03 mh/ml RU+ (G4C2)36	PBS RU-(G4C2)36	0.3mg/ml (G4C2)36 Ru+	0	(G4C2)36 RU+ 3mg/ml	0.03mg/ml (G4C23)36 RU-	-	-		day	PBS RU+(G4C2)36	0.3 mg/ml RU- (G4C2)36	0.03 mh/ml RU+ (G4C2)36	PBS RU-(G4C2)36	0.3mg/ml (G4C2)36 Ru+	0	(G4C2)36 RU+ 3mg/ml	0.03mg/ml (G4C23)36 RU-	-	-		day	PBS RU+(G4C2)36	0.3 mg/ml RU- (G4C2)36	0.03 mh/ml RU+ (G4C2)36	PBS RU-(G4C2)36	0.3mg/ml (G4C2)36 Ru+	0	(G4C2)36 RU+ 3mg/ml	0.03mg/ml (G4C23)36 RU-	-	-		day	PBS RU+(G4C2)36	0.3 mg/ml RU- (G4C2)36	0.03 mh/ml RU+ (G4C2)36	PBS RU-(G4C2)36	0.3mg/ml (G4C2)36 Ru+	0	(G4C2)36 RU+ 3mg/ml	0.03mg/ml (G4C23)36 RU-	-
	date	time														est 0	157	140	93	78	156	150	105	141	150	150
0	2020-08-10	1899-12-31 12:00:00		0													157	140	93	78	156	#REF!	105	141	0	0		0	1	1	1	1	1	1	1	1	1	1		0	0	0	0	0	0	0	0	0	0
1	2020-08-12	1899-12-31 12:00:00		2	0	0	0	0	0	0	51	0	0	0		2	147	139	89	72	145	#REF!	54	133	150	150		2	1	1	1	1	1	1	0.514286	1	1	1		2	0	0	0	0	0	0	0.664976	0	0
2	2020-08-14	1899-12-31 12:00:00		4	0	0	0	0	0	0	30	0	0	0		4	147	139	89	72	145	#REF!	24	133	150	150		4	1	1	1	1	1	#REF!	0.228571	1	1	1		4	0	0	0	0	0	#REF!	0.81093	0	0
3	2020-08-17	1899-12-31 12:00:00		7	3	0	1	0	4	1	24	1	0	0		7	144	139	88	72	141	#REF!	0	132	150	150		7	0.979592	1	0.988764	1	0.972414	#REF!	0	0.992481	1	1		7	0.0206193	0	0.0112996	0	0.0279739	#REF!	#NUM!	0.00754721	0
4	2020-08-19	1899-12-31 12:00:00		9	0	0	0	1	0	0	0	0	0	0		9	134	139	87	70	138	#REF!	0	129	150	150		9	0.979592	1	0.988764	0.986111	0.972414	#REF!	#DIV/0!	0.992481	1	1		9	0	0	0	0.0139862	0	#REF!	#DIV/0!	0	0
5	2020-08-21	1899-12-31 12:00:00		11	6	1	6	0	5	0	0	0	0	0		11	128	138	78	70	133	#REF!	0	129	150	150		11	0.93573	0.992806	0.920573	0.986111	0.937181	#REF!	#DIV/0!	0.992481	1	1		11	0.0458095	0.00722025	0.071459	0	0.0369046	#REF!	#DIV/0!	0	0
6	2020-08-24	1899-12-31 12:00:00		14	8	1	3	0	6	0	0	0	0	0		14	119	137	75	70	127	#REF!	0	129	150	150		14	0.877246	0.985612	0.885167	0.986111	0.894903	#REF!	#DIV/0!	0.992481	1	1		14	0.0645385	0.00727276	0.0392207	0	0.046162	#REF!	#DIV/0!	0	0
7	2020-08-26	1899-12-31 12:00:00		16	6	2	0	0	4	1	0	1	0	0		16	113	135	75	70	123	#REF!	0	128	150	150		16	0.833016	0.971223	0.885167	0.986111	0.866717	#REF!	#DIV/0!	0.984788	1	1		16	0.0517357	0.0147061	0	0	0.0320027	#REF!	#DIV/0!	0.00778214	0
8	2020-08-28	1899-12-31 12:00:00		18	6	7	0	0	5	0	0	0	0	0		18	102	128	75	69	118	#REF!	0	128	150	150		18	0.788785	0.920863	0.885167	0.986111	0.831484	#REF!	#DIV/0!	0.984788	1	1		18	0.054559	0.0532445	0	0	0.0414997	#REF!	#DIV/0!	0	0
9	2020-08-31	1899-12-31 12:00:00		21	37	17	24	2	47	1	0	1	0	0		21	61	109	49	67	71	#REF!	0	126	150	150		21	0.502657	0.798561	0.601913	0.957528	0.5003	#REF!	#DIV/0!	0.977094	1	1		21	0.450586	0.1425	0.385662	0.0294139	0.508005	#REF!	#DIV/0!	0.00784318	0
10	2020-09-02	1899-12-31 12:00:00		23	21	5	10	1	6	0	0	0	0	0		23	39	104	39	66	65	#REF!	0	126	150	150		23	0.329611	0.76193	0.479074	0.943237	0.458021	#REF!	#DIV/0!	0.977094	1	1		23	0.421994	0.046957	0.228259	0.0150379	0.0882926	#REF!	#DIV/0!	0	0
11	2020-09-04	1899-12-31 12:00:00		25	9	2	6	0	9	0	0	0	0	0		25	30	102	33	66	56	#REF!	0	126	150	150		25	0.253547	0.747277	0.40537	0.943237	0.394603	#REF!	#DIV/0!	0.977094	1	1		25	0.262364	0.0194181	0.167054	0	0.149036	#REF!	#DIV/0!	0	0
12	2020-09-07	1899-12-31 12:00:00		28	11	3	5	0	20	1	0	1	0	0		28	19	98	28	66	36	#REF!	0	125	150	150		28	0.16058	0.725299	0.343951	0.943237	0.253673	#REF!	#DIV/0!	0.969339	1	1		28	0.456758	0.029853	0.164303	0	0.441833	#REF!	#DIV/0!	0.00796817	0
13	2020-09-09	1899-12-31 12:00:00		30	3	2	5	0	12	0	0	0	0	0		30	16	96	23	66	24	#REF!	0	125	150	150		30	0.135225	0.710497	0.282531	0.943237	0.169115	#REF!	#DIV/0!	0.969339	1	1		30	0.17185	0.0206193	0.19671	0	0.405465	#REF!	#DIV/0!	0	0
14	2020-09-12	1899-12-31 12:00:00		33	4	4	13	1	5	1	0	1	0	0		33	12	92	10	65	19	#REF!	0	123	150	150		33	0.101419	0.680893	0.122839	0.928945	0.133883	#REF!	#DIV/0!	0.961584	1	1		33	0.287682	0.0425596	0.832909	0.0152675	0.233615	#REF!	#DIV/0!	0.00803217	0
15	2020-09-13	1899-12-31 12:00:00		34	4	1	2	0	2	0	0	0	0	0		34	8	91	8	65	17	#REF!	0	123	150	150		34	0.0676125	0.673492	0.0982716	0.928945	0.11979	#REF!	#DIV/0!	0.961584	1	1		34	0.405465	0.0109291	0.223144	0	0.111226	#REF!	#DIV/0!	0	0
16	2020-09-16	1899-12-31 12:00:00		37	2	1	0	0	1	0	0	0	0	0		37	6	90	8	65	16	#REF!	0	123	150	150		37	0.0507094	0.666091	0.0982716	0.928945	0.112744	#REF!	#DIV/0!	0.961584	1	1		37	0.287682	0.0110498	0	0	0.0606246	#REF!	#DIV/0!	0	0
17	2020-09-18	1899-12-31 12:00:00		39	0	1	0	0	2	0	0	0	0	0		39	6	89	8	65	14	#REF!	0	123	150	150		39	0.0507094	0.65869	0.0982716	0.928945	0.0986507	#REF!	#DIV/0!	0.961584	1	1		39	0	0.0111733	0	0	0.133531	#REF!	#DIV/0!	0	0
18	2020-09-21	1899-12-31 12:00:00		42	3	0	7	4	10	3	0	1	0	0		42	3	89	1	61	4	#REF!	0	122	150	150		42	0.0253547	0.65869	0.0122839	0.871779	0.0281859	#REF!	#DIV/0!	0.953767	1	1		42	0.693147	0	2.07944	0.0635134	1.25276	#REF!	#DIV/0!	0.00816331	0
19	2020-09-23	1899-12-31 12:00:00		44	0	1	0	0	0	3	0	4	0	0		44	3	88	1	61	4	#REF!	0	118	150	150		44	0.0253547	0.651289	0.0122839	0.871779	0.0281859	#REF!	#DIV/0!	0.922496	1	1		44	0	0.0112996	0	0	0	#REF!	#DIV/0!	0.0333364	0
20	2020-09-25	1899-12-31 12:00:00		46	2	3	1	0	2	1	0	1	0	0		46	1	85	0	61	2	#REF!	0	117	150	150		46	0.00845157	0.629086	0	0.871779	0.014093	#REF!	#DIV/0!	0.914678	1	1		46	1.09861	0.0346856	#NUM!	0	0.693147	#REF!	#DIV/0!	0.00851069	0
21	2020-09-28	1899-12-31 12:00:00		49	1	31	0	10	2	45	0	45	0	0		49	0	53	0	51	0	#REF!	0	72	150	150		49	0	0.399654	#DIV/0!	0.728865	0	#REF!	#DIV/0!	0.562879	1	1		49	#NUM!	0.453667	#DIV/0!	0.179048	#NUM!	#REF!	#DIV/0!	0.485508	0
22	2020-09-30	1899-12-31 12:00:00		51	0	4	0	4	0	16	0	16	0	0		51	0	49	0	47	0	#REF!	0	56	150	150		51	#DIV/0!	0.369492	#DIV/0!	0.671699	#DIV/0!	#REF!	#DIV/0!	0.437795	1	1		51	#DIV/0!	0.0784716	#DIV/0!	0.081678	#DIV/0!	#REF!	#DIV/0!	0.251314	0
23	2020-10-02	1899-12-31 12:00:00		53	0	2	0	1	0	3	0	3	0	0		53	0	47	0	46	0	#REF!	0	53	150	150		53	#DIV/0!	0.35441	#DIV/0!	0.657407	#DIV/0!	#REF!	#DIV/0!	0.414341	1	1		53	#DIV/0!	0.0416727	#DIV/0!	0.0215062	#DIV/0!	#REF!	#DIV/0!	0.0550598	0
24	2020-10-05	1899-12-31 12:00:00		56	0	22	0	31	0	16	0	16	0	0		56	0	25	0	15	0	#REF!	0	37	150	150		56	#DIV/0!	0.188516	#DIV/0!	0.214372	#DIV/0!	#REF!	#DIV/0!	0.289257	1	1		56	#DIV/0!	0.631272	#DIV/0!	1.12059	#DIV/0!	#REF!	#DIV/0!	0.359374	0
25	2020-10-07	1899-12-31 12:00:00		58	0	10	0	1	0	11	0	11	0	0		58	0	13	0	14	0	#REF!	0	26	150	150		58	#DIV/0!	0.11311	#DIV/0!	0.200081	#DIV/0!	#REF!	#DIV/0!	0.203262	1	1		58	#DIV/0!	0.510826	#DIV/0!	0.0689929	#DIV/0!	#REF!	#DIV/0!	0.352821	0
26	2020-10-09	1899-12-31 12:00:00		60	0	4	0	1	0	5	0	6	0	0		60	0	9	0	13	0	#REF!	0	20	150	150		60	#DIV/0!	0.0783067	#DIV/0!	0.185789	#DIV/0!	#REF!	#DIV/0!	0.156355	1	1		60	#DIV/0!	0.367725	#DIV/0!	0.074108	#DIV/0!	#REF!	#DIV/0!	0.262364	0
27	2020-10-12	1899-12-31 12:00:00		63	0	2	0	6	0	11	0	13	0	0		63	0	7	0	7	0	#REF!	0	7	150	150		63	#DIV/0!	0.0609052	#DIV/0!	0.10004	#DIV/0!	#REF!	#DIV/0!	0.0547243	1	1		63	#DIV/0!	0.251314	#DIV/0!	0.619039	#DIV/0!	#REF!	#DIV/0!	1.04982	0
28	2020-10-14	1899-12-31 12:00:00		65	0	6	0	1	0	6	0	6	0	0		65	0	1	0	6	0	#REF!	0	1	150	150		65	#DIV/0!	0.00870075	#DIV/0!	0.0857488	#DIV/0!	#REF!	#DIV/0!	0.00781776	1	1		65	#DIV/0!	1.94591	#DIV/0!	0.154151	#DIV/0!	#REF!	#DIV/0!	1.94591	0
29	2020-10-16	1899-12-31 12:00:00		67	0	1	0	0	0	1	0	1	0	0		67	0	0	0	6	0	#REF!	0	0	150	150		67	#DIV/0!	0	#DIV/0!	0.0857488	#DIV/0!	#REF!	#DIV/0!	0	1	1		67	#DIV/0!	#NUM!	#DIV/0!	0	#DIV/0!	#REF!	#DIV/0!	#NUM!	0
30	2020-10-19	1899-12-31 12:00:00		70	0	0	0	2	0	2	0	0	0	0		70	0	0	0	4	0	#REF!	0	0	150	150		70	#DIV/0!	#DIV/0!	#DIV/0!	0.0571659	#DIV/0!	#REF!	#DIV/0!	#DIV/0!	1	1		70	#DIV/0!	#DIV/0!	#DIV/0!	0.405465	#DIV/0!	#REF!	#DIV/0!	#DIV/0!	0
31	2020-10-21	1899-12-31 12:00:00		72	0	0	0	4	0	4	0	0	0	0		72	0	0	0	0	0	#REF!	0	0	150	150		72	#DIV/0!	#DIV/0!	#DIV/0!	0	#DIV/0!	#REF!	#DIV/0!	#DIV/0!	1	1		72	#DIV/0!	#DIV/0!	#DIV/0!	#NUM!	#DIV/0!	#REF!	#DIV/0!	#DIV/0!	0
32	2000-01-01	1899-12-31 12:00:00		72	0	0	0	0	0	0	0	0	0	0		72	0	0	0	0	0	#REF!	0	0	150	150		72	#DIV/0!	#DIV/0!	#DIV/0!	#DIV/0!	#DIV/0!	#REF!	#DIV/0!	#DIV/0!	1	1		72	#DIV/0!	#DIV/0!	#DIV/0!	#DIV/0!	#DIV/0!	#REF!	#DIV/0!	#DIV/0!	0
33	2000-01-01	1899-12-31 12:00:00		72	0	0	0	0	0	0	0	0	0	0		72	0	0	0	0	0	#REF!	0	0	150	150		72	#DIV/0!	#DIV/0!	#DIV/0!	#DIV/0!	#DIV/0!	#REF!	#DIV/0!	#DIV/0!	1	1		72	#DIV/0!	#DIV/0!	#DIV/0!	#DIV/0!	#DIV/0!	#REF!	#DIV/0!	#DIV/0!	0
34	2000-01-01	1899-12-31 12:00:00		72	0	0	0	0	0	0	0	0	0	0		72	0	0	0	0	0	#REF!	0	0	150	150		72	#DIV/0!	#DIV/0!	#DIV/0!	#DIV/0!	#DIV/0!	#REF!	#DIV/0!	#DIV/0!	1	1		72	#DIV/0!	#DIV/0!	#DIV/0!	#DIV/0!	#DIV/0!	#REF!	#DIV/0!	#DIV/0!	0
35	2000-01-01	1899-12-31 12:00:00		72	0	0	0	0	0	0	0	0	0	0		72	0	0	0	0	0	#REF!	0	0	150	150		72	#DIV/0!	#DIV/0!	#DIV/0!	#DIV/0!	#DIV/0!	#REF!	#DIV/0!	#DIV/0!	1	1		72	#DIV/0!	#DIV/0!	#DIV/0!	#DIV/0!	#DIV/0!	#REF!	#DIV/0!	#DIV/0!	0
36	2000-01-01	1899-12-31 12:00:00		72	0	0	0	0	0	0	0	0	0	0		72	0	0	0	0	0	#REF!	0	0	150	150		72	#DIV/0!	#DIV/0!	#DIV/0!	#DIV/0!	#DIV/0!	#REF!	#DIV/0!	#DIV/0!	1	1		72	#DIV/0!	#DIV/0!	#DIV/0!	#DIV/0!	#DIV/0!	#REF!	#DIV/0!	#DIV/0!	0
37	2000-01-01	1899-12-31 12:00:00		72	0	0	0	0	0	0	0	0	0	0		72	0	0	0	0	0	#REF!	0	0	150	150		72	#DIV/0!	#DIV/0!	#DIV/0!	#DIV/0!	#DIV/0!	#REF!	#DIV/0!	#DIV/0!	1	1		72	#DIV/0!	#DIV/0!	#DIV/0!	#DIV/0!	#DIV/0!	#REF!	#DIV/0!	#DIV/0!	0
38	2000-01-01	1899-12-31 12:00:00		72	0	0	0	0	0	0	0	0	0	0		72	0	0	0	0	0	#REF!	0	0	150	150		72	#DIV/0!	#DIV/0!	#DIV/0!	#DIV/0!	#DIV/0!	#REF!	#DIV/0!	#DIV/0!	1	1		72	#DIV/0!	#DIV/0!	#DIV/0!	#DIV/0!	#DIV/0!	#REF!	#DIV/0!	#DIV/0!	0
39	2000-01-01	1899-12-31 12:00:00		72	0	0	0	0	0	0	0	0	0	0		72	0	0	0	0	0	#REF!	0	0	150	150		72	#DIV/0!	#DIV/0!	#DIV/0!	#DIV/0!	#DIV/0!	#REF!	#DIV/0!	#DIV/0!	1	1		72	#DIV/0!	#DIV/0!	#DIV/0!	#DIV/0!	#DIV/0!	#REF!	#DIV/0!	#DIV/0!	0
40	2000-01-01	1899-12-31 12:00:00		72	0	0	0	0	0	0	0	0	0	0		72	0	0	0	0	0	#REF!	0	0	150	150		72	#DIV/0!	#DIV/0!	#DIV/0!	#DIV/0!	#DIV/0!	#REF!	#DIV/0!	#DIV/0!	1	1		72	#DIV/0!	#DIV/0!	#DIV/0!	#DIV/0!	#DIV/0!	#REF!	#DIV/0!	#DIV/0!	0
41	2000-01-01	1899-12-31 12:00:00		72	0	0	0	0	0	0	0	0	0	0		72	0	0	0	0	0	#REF!	0	0	150	150		72	#DIV/0!	#DIV/0!	#DIV/0!	#DIV/0!	#DIV/0!	#REF!	#DIV/0!	#DIV/0!	1	1		72	#DIV/0!	#DIV/0!	#DIV/0!	#DIV/0!	#DIV/0!	#REF!	#DIV/0!	#DIV/0!	0
42	2000-01-01	1899-12-31 12:00:00		72	0	0	0	0	0	0	0	0	0	0		72	0	0	0	0	0	#REF!	0	0	150	150		72	#DIV/0!	#DIV/0!	#DIV/0!	#DIV/0!	#DIV/0!	#REF!	#DIV/0!	#DIV/0!	1	1		72	#DIV/0!	#DIV/0!	#DIV/0!	#DIV/0!	#DIV/0!	#REF!	#DIV/0!	#DIV/0!	0
43	2000-01-01	1899-12-31 12:00:00		72	0	0	0	0	0	0	0	0	0	0		72	0	0	0	0	0	#REF!	0	0	150	150		72	#DIV/0!	#DIV/0!	#DIV/0!	#DIV/0!	#DIV/0!	#REF!	#DIV/0!	#DIV/0!	1	1		72	#DIV/0!	#DIV/0!	#DIV/0!	#DIV/0!	#DIV/0!	#REF!	#DIV/0!	#DIV/0!	0
44	2000-01-01	1899-12-31 12:00:00		72	0	0	0	0	0	0	0	0	0	0		72	0	0	0	0	0	#REF!	0	0	150	150		72	#DIV/0!	#DIV/0!	#DIV/0!	#DIV/0!	#DIV/0!	#REF!	#DIV/0!	#DIV/0!	1	1		72	#DIV/0!	#DIV/0!	#DIV/0!	#DIV/0!	#DIV/0!	#REF!	#DIV/0!	#DIV/0!	0
45	2000-01-01	1899-12-31 12:00:00		72	0	0	0	0	0	0	0	0	0	0		72	0	0	0	0	0	#REF!	0	0	150	150		72	#DIV/0!	#DIV/0!	#DIV/0!	#DIV/0!	#DIV/0!	#REF!	#DIV/0!	#DIV/0!	1	1		72	#DIV/0!	#DIV/0!	#DIV/0!	#DIV/0!	#DIV/0!	#REF!	#DIV/0!	#DIV/0!	0
46	2000-01-01	1899-12-31 12:00:00		72	0	0	0	0	0	0	0	0	0	0		72	0	0	0	0	0	#REF!	0	0	150	150		72	#DIV/0!	#DIV/0!	#DIV/0!	#DIV/0!	#DIV/0!	#REF!	#DIV/0!	#DIV/0!	1	1		72	#DIV/0!	#DIV/0!	#DIV/0!	#DIV/0!	#DIV/0!	#REF!	#DIV/0!	#DIV/0!	0
47	2000-01-01	1899-12-31 12:00:00		72	0	0	0	0	0	0	0	0	0	0		72	0	0	0	0	0	#REF!	0	0	150	150		72	#DIV/0!	#DIV/0!	#DIV/0!	#DIV/0!	#DIV/0!	#REF!	#DIV/0!	#DIV/0!	1	1		72	#DIV/0!	#DIV/0!	#DIV/0!	#DIV/0!	#DIV/0!	#REF!	#DIV/0!	#DIV/0!	0
48	2000-01-01	1899-12-31 12:00:00		72	0	0	0	0	0	0	0	0	0	0		72	0	0	0	0	0	#REF!	0	0	150	150		72	#DIV/0!	#DIV/0!	#DIV/0!	#DIV/0!	#DIV/0!	#REF!	#DIV/0!	#DIV/0!	1	1		72	#DIV/0!	#DIV/0!	#DIV/0!	#DIV/0!	#DIV/0!	#REF!	#DIV/0!	#DIV/0!	0
49	2000-01-01	1899-12-31 12:00:00		72	0	0	0	0	0	0	0	0	0	0		72	0	0	0	0	0	#REF!	0	0	150	150		72	#DIV/0!	#DIV/0!	#DIV/0!	#DIV/0!	#DIV/0!	#REF!	#DIV/0!	#DIV/0!	1	1		72	#DIV/0!	#DIV/0!	#DIV/0!	#DIV/0!	#DIV/0!	#REF!	#DIV/0!	#DIV/0!	0
50	2000-01-01	1899-12-31 12:00:00		72	0	0	0	0	0	0	0	0	0	0		72	0	0	0	0	0	#REF!	0	0	150	150		72	#DIV/0!	#DIV/0!	#DIV/0!	#DIV/0!	#DIV/0!	#REF!	#DIV/0!	#DIV/0!	1	1		72	#DIV/0!	#DIV/0!	#DIV/0!	#DIV/0!	#DIV/0!	#REF!	#DIV/0!	#DIV/0!	0
51	2000-01-01	1899-12-31 12:00:00		72	0	0	0	0	0	0	0	0	0	0		72	0	0	0	0	0	#REF!	0	0	150	150		72	#DIV/0!	#DIV/0!	#DIV/0!	#DIV/0!	#DIV/0!	#REF!	#DIV/0!	#DIV/0!	1	1		72	#DIV/0!	#DIV/0!	#DIV/0!	#DIV/0!	#DIV/0!	#REF!	#DIV/0!	#DIV/0!	0
52	2000-01-01	1899-12-31 12:00:00		72	0	0	0	0	0	0	0	0	0	0		72	0	0	0	0	0	#REF!	0	0	150	150		72	#DIV/0!	#DIV/0!	#DIV/0!	#DIV/0!	#DIV/0!	#REF!	#DIV/0!	#DIV/0!	1	1		72	#DIV/0!	#DIV/0!	#DIV/0!	#DIV/0!	#DIV/0!	#REF!	#DIV/0!	#DIV/0!	0
53	2000-01-01	1899-12-31 12:00:00		72	0	0	0	0	0	0	0	0	0	0		72	0	0	0	0	0	#REF!	0	0	150	150		72	#DIV/0!	#DIV/0!	#DIV/0!	#DIV/0!	#DIV/0!	#REF!	#DIV/0!	#DIV/0!	1	1		72	#DIV/0!	#DIV/0!	#DIV/0!	#DIV/0!	#DIV/0!	#REF!	#DIV/0!	#DIV/0!	0
54	2000-01-01	1899-12-31 12:00:00		72	0	0	0	0	0	0	0	0	0	0		72	0	0	0	0	0	#REF!	0	0	150	150		72	#DIV/0!	#DIV/0!	#DIV/0!	#DIV/0!	#DIV/0!	#REF!	#DIV/0!	#DIV/0!	1	1		72	#DIV/0!	#DIV/0!	#DIV/0!	#DIV/0!	#DIV/0!	#REF!	#DIV/0!	#DIV/0!	0
55	2000-01-01	1899-12-31 12:00:00		72	0	0	0	0	0	0	0	0	0	0		72	0	0	0	0	0	#REF!	0	0	150	150		72	#DIV/0!	#DIV/0!	#DIV/0!	#DIV/0!	#DIV/0!	#REF!	#DIV/0!	#DIV/0!	1	1		72	#DIV/0!	#DIV/0!	#DIV/0!	#DIV/0!	#DIV/0!	#REF!	#DIV/0!	#DIV/0!	0
56	2000-01-01	1899-12-31 12:00:00		72	0	0	0	0	0	0	0	0	0	0		72	0	0	0	0	0	#REF!	0	0	150	150		72	#DIV/0!	#DIV/0!	#DIV/0!	#DIV/0!	#DIV/0!	#REF!	#DIV/0!	#DIV/0!	1	1		72	#DIV/0!	#DIV/0!	#DIV/0!	#DIV/0!	#DIV/0!	#REF!	#DIV/0!	#DIV/0!	0
57	2000-01-01	1899-12-31 12:00:00		72	0	0	0	0	0	0	0	0	0	0		72	0	0	0	0	0	#REF!	0	0	150	150		72	#DIV/0!	#DIV/0!	#DIV/0!	#DIV/0!	#DIV/0!	#REF!	#DIV/0!	#DIV/0!	1	1		72	#DIV/0!	#DIV/0!	#DIV/0!	#DIV/0!	#DIV/0!	#REF!	#DIV/0!	#DIV/0!	0
58	2000-01-01	1899-12-31 12:00:00		72	0	0	0	0	0	0	0	0	0	0		72	0	0	0	0	0	#REF!	0	0	150	150		72	#DIV/0!	#DIV/0!	#DIV/0!	#DIV/0!	#DIV/0!	#REF!	#DIV/0!	#DIV/0!	1	1		72	#DIV/0!	#DIV/0!	#DIV/0!	#DIV/0!	#DIV/0!	#REF!	#DIV/0!	#DIV/0!	0
59	2000-01-01	1899-12-31 12:00:00		72	0	0	0	0	0	0	0	0	0	0		72	0	0	0	0	0	#REF!	0	0	150	150		72	#DIV/0!	#DIV/0!	#DIV/0!	#DIV/0!	#DIV/0!	#REF!	#DIV/0!	#DIV/0!	1	1		72	#DIV/0!	#DIV/0!	#DIV/0!	#DIV/0!	#DIV/0!	#REF!	#DIV/0!	#DIV/0!	0
60	2000-01-01	1899-12-31 12:00:00		72	0	0	0	0	0	0	0	0	0	0		72	0	0	0	0	0	#REF!	0	0	150	150		72	#DIV/0!	#DIV/0!	#DIV/0!	#DIV/0!	#DIV/0!	#REF!	#DIV/0!	#DIV/0!	1	1		72	#DIV/0!	#DIV/0!	#DIV/0!	#DIV/0!	#DIV/0!	#REF!	#DIV/0!	#DIV/0!	0
61	2000-01-01	1899-12-31 12:00:00		72	0	0	0	0	0	0	0	0	0	0		72	0	0	0	0	0	#REF!	0	0	150	150		72	#DIV/0!	#DIV/0!	#DIV/0!	#DIV/0!	#DIV/0!	#REF!	#DIV/0!	#DIV/0!	1	1		72	#DIV/0!	#DIV/0!	#DIV/0!	#DIV/0!	#DIV/0!	#REF!	#DIV/0!	#DIV/0!	0
62	2000-01-01	1899-12-31 12:00:00		72	0	0	0	0	0	0	0	0	0	0		72	0	0	0	0	0	#REF!	0	0	150	150		72	#DIV/0!	#DIV/0!	#DIV/0!	#DIV/0!	#DIV/0!	#REF!	#DIV/0!	#DIV/0!	1	1		72	#DIV/0!	#DIV/0!	#DIV/0!	#DIV/0!	#DIV/0!	#REF!	#DIV/0!	#DIV/0!	0
63	2000-01-01	1899-12-31 12:00:00		72	0	0	0	0	0	0	0	0	0	0		72	0	0	0	0	0	#REF!	0	0	150	150		72	#DIV/0!	#DIV/0!	#DIV/0!	#DIV/0!	#DIV/0!	#REF!	#DIV/0!	#DIV/0!	1	1		72	#DIV/0!	#DIV/0!	#DIV/0!	#DIV/0!	#DIV/0!	#REF!	#DIV/0!	#DIV/0!	0
64	2000-01-01	1899-12-31 12:00:00		72	0	0	0	0	0	0	0	0	0	0		72	0	0	0	0	0	#REF!	0	0	150	150		72	#DIV/0!	#DIV/0!	#DIV/0!	#DIV/0!	#DIV/0!	#REF!	#DIV/0!	#DIV/0!	1	1		72	#DIV/0!	#DIV/0!	#DIV/0!	#DIV/0!	#DIV/0!	#REF!	#DIV/0!	#DIV/0!	0
65	2000-01-01	1899-12-31 12:00:00		72	0	0	0	0	0	0	0	0	0	0		72	0	0	0	0	0	#REF!	0	0	150	150		72	#DIV/0!	#DIV/0!	#DIV/0!	#DIV/0!	#DIV/0!	#REF!	#DIV/0!	#DIV/0!	1	1		72	#DIV/0!	#DIV/0!	#DIV/0!	#DIV/0!	#DIV/0!	#REF!	#DIV/0!	#DIV/0!	0
66	2000-01-01	1899-12-31 12:00:00		72	0	0	0	0	0	0	0	0	0	0		72	0	0	0	0	0	#REF!	0	0	150	150		72	#DIV/0!	#DIV/0!	#DIV/0!	#DIV/0!	#DIV/0!	#REF!	#DIV/0!	#DIV/0!	1	1		72	#DIV/0!	#DIV/0!	#DIV/0!	#DIV/0!	#DIV/0!	#REF!	#DIV/0!	#DIV/0!	0
67	2000-01-01	1899-12-31 12:00:00		72	0	0	0	0	0	0	0	0	0	0		72	0	0	0	0	0	#REF!	0	0	150	150		72	#DIV/0!	#DIV/0!	#DIV/0!	#DIV/0!	#DIV/0!	#REF!	#DIV/0!	#DIV/0!	1	1		72	#DIV/0!	#DIV/0!	#DIV/0!	#DIV/0!	#DIV/0!	#REF!	#DIV/0!	#DIV/0!	0
68	2000-01-01	1899-12-31 12:00:00		72	0	0	0	0	0	0	0	0	0	0		72	0	0	0	0	0	#REF!	0	0	150	150		72	#DIV/0!	#DIV/0!	#DIV/0!	#DIV/0!	#DIV/0!	#REF!	#DIV/0!	#DIV/0!	1	1		72	#DIV/0!	#DIV/0!	#DIV/0!	#DIV/0!	#DIV/0!	#REF!	#DIV/0!	#DIV/0!	0
69	2000-01-01	1899-12-31 12:00:00		72	0	0	0	0	0	0	0	0	0	0		72	0	0	0	0	0	#REF!	0	0	150	150		72	#DIV/0!	#DIV/0!	#DIV/0!	#DIV/0!	#DIV/0!	#REF!	#DIV/0!	#DIV/0!	1	1		72	#DIV/0!	#DIV/0!	#DIV/0!	#DIV/0!	#DIV/0!	#REF!	#DIV/0!	#DIV/0!	0
70	2000-01-01	1899-12-31 12:00:00		72	0	0	0	0	0	0	0	0	0	0		72	0	0	0	0	0	#REF!	0	0	150	150		72	#DIV/0!	#DIV/0!	#DIV/0!	#DIV/0!	#DIV/0!	#REF!	#DIV/0!	#DIV/0!	1	1		72	#DIV/0!	#DIV/0!	#DIV/0!	#DIV/0!	#DIV/0!	#REF!	#DIV/0!	#DIV/0!	0
71	2000-01-01	1899-12-31 12:00:00		72	0	0	0	0	0	0	0	0	0	0		72	0	0	0	0	0	#REF!	0	0	150	150		72	#DIV/0!	#DIV/0!	#DIV/0!	#DIV/0!	#DIV/0!	#REF!	#DIV/0!	#DIV/0!	1	1		72	#DIV/0!	#DIV/0!	#DIV/0!	#DIV/0!	#DIV/0!	#REF!	#DIV/0!	#DIV/0!	0
72	2000-01-01	1899-12-31 12:00:00		72	0	0	0	0	0	0	0	0	0	0		72	0	0	0	0	0	#REF!	0	0	150	150		72	#DIV/0!	#DIV/0!	#DIV/0!	#DIV/0!	#DIV/0!	#REF!	#DIV/0!	#DIV/0!	1	1		72	#DIV/0!	#DIV/0!	#DIV/0!	#DIV/0!	#DIV/0!	#REF!	#DIV/0!	#DIV/0!	0
73	2000-01-01	1899-12-31 12:00:00		72	0	0	0	0	0	0	0	0	0	0		72	0	0	0	0	0	#REF!	0	0	150	150		72	#DIV/0!	#DIV/0!	#DIV/0!	#DIV/0!	#DIV/0!	#REF!	#DIV/0!	#DIV/0!	1	1		72	#DIV/0!	#DIV/0!	#DIV/0!	#DIV/0!	#DIV/0!	#REF!	#DIV/0!	#DIV/0!	0
74	2000-01-01	1899-12-31 12:00:00		72	0	0	0	0	0	0	0	0	0	0		72	0	0	0	0	0	#REF!	0	0	150	150		72	#DIV/0!	#DIV/0!	#DIV/0!	#DIV/0!	#DIV/0!	#REF!	#DIV/0!	#DIV/0!	1	1		72	#DIV/0!	#DIV/0!	#DIV/0!	#DIV/0!	#DIV/0!	#REF!	#DIV/0!	#DIV/0!	0
75	2000-01-01	1899-12-31 12:00:00		72	0	0	0	0	0	0	0	0	0	0		72	0	0	0	0	0	#REF!	0	0	150	150		72	#DIV/0!	#DIV/0!	#DIV/0!	#DIV/0!	#DIV/0!	#REF!	#DIV/0!	#DIV/0!	1	1		72	#DIV/0!	#DIV/0!	#DIV/0!	#DIV/0!	#DIV/0!	#REF!	#DIV/0!	#DIV/0!	0
				censors
				day	PBS RU+(G4C2)36	0.3 mg/ml RU- (G4C2)36	0.03 mh/ml RU+ (G4C2)36	PBS RU-(G4C2)36	0.3mg/ml (G4C2)36 Ru+	0	(G4C2)36 RU+ 3mg/ml	0.03mg/ml (G4C23)36 RU-	-	-
	2020-08-10	1899-12-31 12:00:00		0	0	0	0	0	0	0	0	0	0	0
1	2020-08-12	1899-12-31 12:00:00		2	10	1	4	6	11	#REF!	0	8	0	0
2	2020-08-14	1899-12-31 12:00:00		4	0	0	0	0	0	0	0	0	0	0
3	2020-08-17	1899-12-31 12:00:00		7	0	0	0	0	0	0	0	0	0	0
4	2020-08-19	1899-12-31 12:00:00		9	10	0	1	1	3	3	0	3	0	0
5	2020-08-21	1899-12-31 12:00:00		11	0	0	3	0	0	0	0	0	0	0
6	2020-08-24	1899-12-31 12:00:00		14	1	0	0	0	0	0	0	0	0	0
7	2020-08-26	1899-12-31 12:00:00		16	0	0	0	0	0	0	0	0	0	0
8	2020-08-28	1899-12-31 12:00:00		18	5	0	0	1	0	0	0	0	0	0
9	2020-08-31	1899-12-31 12:00:00		21	4	2	2	0	0	1	0	1	0	0
10	2020-09-02	1899-12-31 12:00:00		23	1	0	0	0	0	0	0	0	0	0
11	2020-09-04	1899-12-31 12:00:00		25	0	0	0	0	0	0	0	0	0	0
12	2020-09-07	1899-12-31 12:00:00		28	0	1	0	0	0	0	0	0	0	0
13	2020-09-09	1899-12-31 12:00:00		30	0	0	0	0	0	0	0	0	0	0
14	2020-09-12	1899-12-31 12:00:00		33	0	0	0	0	0	1	0	1	0	0
15	2020-09-13	1899-12-31 12:00:00		34	0	0	0	0	0	0	0	0	0	0
16	2020-09-16	1899-12-31 12:00:00		37	0	0	0	0	0	0	0	0	0	0
17	2020-09-18	1899-12-31 12:00:00		39	0	0	0	0	0	0	0	0	0	0
18	2020-09-21	1899-12-31 12:00:00		42	0	0	0	0	0	0	0	0	0	0
19	2020-09-23	1899-12-31 12:00:00		44	0	0	0	0	0	0	0	0	0	0
20	2020-09-25	1899-12-31 12:00:00		46	0	0	0	0	0	0	0	0	0	0
21	2020-09-28	1899-12-31 12:00:00		49	0	1	0	0	0	0	0	0	0	0
22	2020-09-30	1899-12-31 12:00:00		51	0	0	0	0	0	0	0	0	0	0
23	2020-10-02	1899-12-31 12:00:00		53	0	0	0	0	0	0	0	0	0	0
24	2020-10-05	1899-12-31 12:00:00		56	0	0	0	0	0	0	0	0	0	0
25	2020-10-07	1899-12-31 12:00:00		58	0	2	0	0	0	0	0	0	0	0
26	2020-10-09	1899-12-31 12:00:00		60	0	0	0	0	0	0	0	0	0	0
27	2020-10-12	1899-12-31 12:00:00		63	0	0	0	0	0	0	0	0	0	0
28	2020-10-14	1899-12-31 12:00:00		65	0	0	0	0	0	0	0	0	0	0
29	2020-10-16	1899-12-31 12:00:00		67	0	0	0	0	0	0	0	0	0	0
30	2020-10-19	1899-12-31 12:00:00		70	0	0	0	0	0	0	0	0	0	0
31	2020-10-21	1899-12-31 12:00:00		72	0	0	0	0	0	0	0	0	0	0
32	2000-01-01	1899-12-31 12:00:00		72	0	0	0	0	0	0	0	0	0	0
33	2000-01-01	1899-12-31 12:00:00		72	0	0	0	0	0	0	0	0	0	0
34	2000-01-01	1899-12-31 12:00:00		72	0	0	0	0	0	0	0	0	0	0
35	2000-01-01	1899-12-31 12:00:00		72	0	0	0	0	0	0	0	0	0	0
36	2000-01-01	1899-12-31 12:00:00		72	0	0	0	0	0	0	0	0	0	0
37	2000-01-01	1899-12-31 12:00:00		72	0	0	0	0	0	0	0	0	0	0
38	2000-01-01	1899-12-31 12:00:00		72	0	0	0	0	0	0	0	0	0	0
39	2000-01-01	1899-12-31 12:00:00		72	0	0	0	0	0	0	0	0	0	0
40	2000-01-01	1899-12-31 12:00:00		72	0	0	0	0	0	0	0	0	0	0
41	2000-01-01	1899-12-31 12:00:00		72	0	0	0	0	0	0	0	0	0	0
42	2000-01-01	1899-12-31 12:00:00		72	0	0	0	0	0	0	0	0	0	0
43	2000-01-01	1899-12-31 12:00:00		72	0	0	0	0	0	0	0	0	0	0
44	2000-01-01	1899-12-31 12:00:00		72	0	0	0	0	0	0	0	0	0	0
45	2000-01-01	1899-12-31 12:00:00		72	0	0	0	0	0	0	0	0	0	0
46	2000-01-01	1899-12-31 12:00:00		72	0	0	0	0	0	0	0	0	0	0
47	2000-01-01	1899-12-31 12:00:00		72	0	0	0	0	0	0	0	0	0	0
48	2000-01-01	1899-12-31 12:00:00		72	0	0	0	0	0	0	0	0	0	0
49	2000-01-01	1899-12-31 12:00:00		72	0	0	0	0	0	0	0	0	0	0
50	2000-01-01	1899-12-31 12:00:00		72	0	0	0	0	0	0	0	0	0	0
51	2000-01-01	1899-12-31 12:00:00		72	0	0	0	0	0	0	0	0	0	0
52	2000-01-01	1899-12-31 12:00:00		72	0	0	0	0	0	0	0	0	0	0
53	2000-01-01	1899-12-31 12:00:00		72	0	0	0	0	0	0	0	0	0	0
54	2000-01-01	1899-12-31 12:00:00		72	0	0	0	0	0	0	0	0	0	0
55	2000-01-01	1899-12-31 12:00:00		72	0	0	0	0	0	0	0	0	0	0
56	2000-01-01	1899-12-31 12:00:00		72	0	0	0	0	0	0	0	0	0	0
57	2000-01-01	1899-12-31 12:00:00		72	0	0	0	0	0	0	0	0	0	0
58	2000-01-01	1899-12-31 12:00:00		72	0	0	0	0	0	0	0	0	0	0
59	2000-01-01	1899-12-31 12:00:00		72	0	0	0	0	0	0	0	0	0	0
60	2000-01-01	1899-12-31 12:00:00		72	0	0	0	0	0	0	0	0	0	0
61	2000-01-01	1899-12-31 12:00:00		72	0	0	0	0	0	0	0	0	0	0
62	2000-01-01	1899-12-31 12:00:00		72	0	0	0	0	0	0	0	0	0	0
63	2000-01-01	1899-12-31 12:00:00		72	0	0	0	0	0	0	0	0	0	0
64	2000-01-01	1899-12-31 12:00:00		72	0	0	0	0	0	0	0	0	0	0
65	2000-01-01	1899-12-31 12:00:00		72	0	0	0	0	0	0	0	0	0	0
66	2000-01-01	1899-12-31 12:00:00		72	0	0	0	0	0	0	0	0	0	0
67	2000-01-01	1899-12-31 12:00:00		72	0	0	0	0	0	0	0	0	0	0
68	2000-01-01	1899-12-31 12:00:00		72	0	0	0	0	0	0	0	0	0	0
69	2000-01-01	1899-12-31 12:00:00		72	0	0	0	0	0	0	0	0	0	0
70	2000-01-01	1899-12-31 12:00:00		72	0	0	0	0	0	0	0	0	0	0
71	2000-01-01	1899-12-31 12:00:00		72	0	0	0	0	0	0	0	0	0	0
72	2000-01-01	1899-12-31 12:00:00		72	0	0	0	0	0	0	0	0	0	0
73	2000-01-01	1899-12-31 12:00:00		72	0	0	0	0	0	0	0	0	0	0
74	2000-01-01	1899-12-31 12:00:00		72	0	0	0	0	0	0	0	0	0	0
75	2000-01-01	1899-12-31 12:00:00		72	0	0	0	0	0	0	0	0	0	0
[truncated: 84 more columns]

## Sheet: egg data
		treatment start date	2020-08-10																				total eggs laid per ave female
																								food	ave of sum egg production for ave female	error		median LS
	date on food
	time on food																							PBS RU+(G4C2)36	#DIV/0!	#DIV/0!		22
	date off food																							0.3 mg/ml RU- (G4C2)36	#DIV/0!	#DIV/0!		47.5
	time off food																							0.03 mh/ml RU+ (G4C2)36	#DIV/0!	#DIV/0!		22
	day		-44053		-44053		-44053		-44053		-44053		-44053		-44053		-44053		-44053		-44053			PBS RU-(G4C2)36	#DIV/0!	#DIV/0!		54.5
	time on food (h)		0		0		0		0		0		0		0		0		0		0			0.3mg/ml (G4C2)36 Ru+	#DIV/0!	#DIV/0!		22
	fraction of 24h		0		0		0		0		0		0		0		0		0		0			0	#DIV/0!	#DIV/0!		0
		flies in		flies in		flies in		flies in		flies in		flies in		flies in		flies in		flies in		flies in				(G4C2)36 RU+ 3mg/ml	#DIV/0!	#DIV/0!		3
PBS RU+(G4C2)36		vial		vial		vial		vial		vial		vial		vial		vial		vial		vial				0.03mg/ml (G4C23)36 RU-	#DIV/0!	#DIV/0!		50
	1	#N/A		#N/A		#N/A		#N/A		#N/A		#N/A		#N/A		#N/A		#N/A		#N/A				-	#DIV/0!	#DIV/0!		0
	2	#N/A		#N/A		#N/A		#N/A		#N/A		#N/A		#N/A		#N/A		#N/A		#N/A				-	#DIV/0!	#DIV/0!		0
	3	#N/A		#N/A		#N/A		#N/A		#N/A		#N/A		#N/A		#N/A		#N/A		#N/A
	4	#N/A		#N/A		#N/A		#N/A		#N/A		#N/A		#N/A		#N/A		#N/A		#N/A
	5	#N/A		#N/A		#N/A		#N/A		#N/A		#N/A		#N/A		#N/A		#N/A		#N/A
	6	#N/A		#N/A		#N/A		#N/A		#N/A		#N/A		#N/A		#N/A		#N/A		#N/A
	7	#N/A		#N/A		#N/A		#N/A		#N/A		#N/A		#N/A		#N/A		#N/A		#N/A
	8	#N/A		#N/A		#N/A		#N/A		#N/A		#N/A		#N/A		#N/A		#N/A		#N/A
	9	#N/A		#N/A		#N/A		#N/A		#N/A		#N/A		#N/A		#N/A		#N/A		#N/A
	10	#N/A		#N/A		#N/A		#N/A		#N/A		#N/A		#N/A		#N/A		#N/A		#N/A
eggs per 24 h per female
			#DIV/0!																			sum	#DIV/0!
			#DIV/0!																				#DIV/0!
			#DIV/0!																				#DIV/0!
			#DIV/0!																				#DIV/0!
			#DIV/0!																				#DIV/0!
			#DIV/0!																				#DIV/0!
			#DIV/0!																				#DIV/0!
			#DIV/0!																				#DIV/0!
			#DIV/0!																				#DIV/0!
			#DIV/0!																				#DIV/0!
	average		#DIV/0!																			ave	#DIV/0!
	sd		#DIV/0!																			n	0
	n		0																			sd	#DIV/0!
	se		#DIV/0!																			error	#DIV/0!
0.3 mg/ml RU- (G4C2)36
	21	#N/A		#N/A		#N/A		#N/A		#N/A		#N/A		#N/A		#N/A		#N/A		#N/A
	22	#N/A		#N/A		#N/A		#N/A		#N/A		#N/A		#N/A		#N/A		#N/A		#N/A
	23	#N/A		#N/A		#N/A		#N/A		#N/A		#N/A		#N/A		#N/A		#N/A		#N/A
	24	#N/A		#N/A		#N/A		#N/A		#N/A		#N/A		#N/A		#N/A		#N/A		#N/A
	25	#N/A		#N/A		#N/A		#N/A		#N/A		#N/A		#N/A		#N/A		#N/A		#N/A
	26	#N/A		#N/A		#N/A		#N/A		#N/A		#N/A		#N/A		#N/A		#N/A		#N/A
	27	#N/A		#N/A		#N/A		#N/A		#N/A		#N/A		#N/A		#N/A		#N/A		#N/A
	28	#N/A		#N/A		#N/A		#N/A		#N/A		#N/A		#N/A		#N/A		#N/A		#N/A
	29	#N/A		#N/A		#N/A		#N/A		#N/A		#N/A		#N/A		#N/A		#N/A		#N/A
	30	#N/A		#N/A		#N/A		#N/A		#N/A		#N/A		#N/A		#N/A		#N/A		#N/A
eggs per 24 h per female
			#DIV/0!																			sum	#DIV/0!
			#DIV/0!																				#DIV/0!
			#DIV/0!																				#DIV/0!
			#DIV/0!																				#DIV/0!
			#DIV/0!																				#DIV/0!
			#DIV/0!																				#DIV/0!
			#DIV/0!																				#DIV/0!
			#DIV/0!																				#DIV/0!
			#DIV/0!																				#DIV/0!
			#DIV/0!																				#DIV/0!
	average		#DIV/0!																			ave	#DIV/0!
	sd		#DIV/0!																			n	0
	n		0																			sd	#DIV/0!
	se		#DIV/0!																			error	#DIV/0!
0.03 mh/ml RU+ (G4C2)36
	41	#N/A		#N/A		#N/A		#N/A		#N/A		#N/A		#N/A		#N/A		#N/A		#N/A
	42	#N/A		#N/A		#N/A		#N/A		#N/A		#N/A		#N/A		#N/A		#N/A		#N/A
	43	#N/A		#N/A		#N/A		#N/A		#N/A		#N/A		#N/A		#N/A		#N/A		#N/A
	44	#N/A		#N/A		#N/A		#N/A		#N/A		#N/A		#N/A		#N/A		#N/A		#N/A
	45	#N/A		#N/A		#N/A		#N/A		#N/A		#N/A		#N/A		#N/A		#N/A		#N/A
	46	#N/A		#N/A		#N/A		#N/A		#N/A		#N/A		#N/A		#N/A		#N/A		#N/A
	47	#N/A		#N/A		#N/A		#N/A		#N/A		#N/A		#N/A		#N/A		#N/A		#N/A
	48	#N/A		#N/A		#N/A		#N/A		#N/A		#N/A		#N/A		#N/A		#N/A		#N/A
	49	#N/A		#N/A		#N/A		#N/A		#N/A		#N/A		#N/A		#N/A		#N/A		#N/A
	50	#N/A		#N/A		#N/A		#N/A		#N/A		#N/A		#N/A		#N/A		#N/A		#N/A
eggs per 24 h per female
			#DIV/0!																			sum	#DIV/0!
			#DIV/0!																				#DIV/0!
			#DIV/0!																				#DIV/0!
			#DIV/0!																				#DIV/0!
			#DIV/0!																				#DIV/0!
			#DIV/0!																				#DIV/0!
			#DIV/0!																				#DIV/0!
			#DIV/0!																				#DIV/0!
			#DIV/0!																				#DIV/0!
			#DIV/0!																				#DIV/0!
	average		#DIV/0!																			ave	#DIV/0!
	sd		#DIV/0!																			n	0
	n		0																			sd	#DIV/0!
	se		#DIV/0!																			error	#DIV/0!
PBS RU-(G4C2)36
	61	#N/A		#N/A		#N/A		#N/A		#N/A		#N/A		#N/A		#N/A		#N/A		#N/A
	62	#N/A		#N/A		#N/A		#N/A		#N/A		#N/A		#N/A		#N/A		#N/A		#N/A
	63	#N/A		#N/A		#N/A		#N/A		#N/A		#N/A		#N/A		#N/A		#N/A		#N/A
	64	#N/A		#N/A		#N/A		#N/A		#N/A		#N/A		#N/A		#N/A		#N/A		#N/A
	65	#N/A		#N/A		#N/A		#N/A		#N/A		#N/A		#N/A		#N/A		#N/A		#N/A
	66	#N/A		#N/A		#N/A		#N/A		#N/A		#N/A		#N/A		#N/A		#N/A		#N/A
	67	#N/A		#N/A		#N/A		#N/A		#N/A		#N/A		#N/A		#N/A		#N/A		#N/A
	68	#N/A		#N/A		#N/A		#N/A		#N/A		#N/A		#N/A		#N/A		#N/A		#N/A
	69	#N/A		#N/A		#N/A		#N/A		#N/A		#N/A		#N/A		#N/A		#N/A		#N/A
	70	#N/A		#N/A		#N/A		#N/A		#N/A		#N/A		#N/A		#N/A		#N/A		#N/A
eggs per 24 h per female
			#DIV/0!																			sum	#DIV/0!
			#DIV/0!																				#DIV/0!
			#DIV/0!																				#DIV/0!
			#DIV/0!																				#DIV/0!
			#DIV/0!																				#DIV/0!
			#DIV/0!																				#DIV/0!
			#DIV/0!																				#DIV/0!
			#DIV/0!																				#DIV/0!
			#DIV/0!																				#DIV/0!
			#DIV/0!																				#DIV/0!
	average		#DIV/0!																			ave	#DIV/0!
	sd		#DIV/0!																			n	0
	n		0																			sd	#DIV/0!
	se		#DIV/0!																			error	#DIV/0!
0.3mg/ml (G4C2)36 Ru+
	81	#N/A		#N/A		#N/A		#N/A		#N/A		#N/A		#N/A		#N/A		#N/A		#N/A
	82	#N/A		#N/A		#N/A		#N/A		#N/A		#N/A		#N/A		#N/A		#N/A		#N/A
	83	#N/A		#N/A		#N/A		#N/A		#N/A		#N/A		#N/A		#N/A		#N/A		#N/A
	84	#N/A		#N/A		#N/A		#N/A		#N/A		#N/A		#N/A		#N/A		#N/A		#N/A
	85	#N/A		#N/A		#N/A		#N/A		#N/A		#N/A		#N/A		#N/A		#N/A		#N/A
	86	#N/A		#N/A		#N/A		#N/A		#N/A		#N/A		#N/A		#N/A		#N/A		#N/A
	87	#N/A		#N/A		#N/A		#N/A		#N/A		#N/A		#N/A		#N/A		#N/A		#N/A
	88	#N/A		#N/A		#N/A		#N/A		#N/A		#N/A		#N/A		#N/A		#N/A		#N/A
	89	#N/A		#N/A		#N/A		#N/A		#N/A		#N/A		#N/A		#N/A		#N/A		#N/A
	90	#N/A		#N/A		#N/A		#N/A		#N/A		#N/A		#N/A		#N/A		#N/A		#N/A
eggs per 24 h per female
			#DIV/0!																			sum	#DIV/0!
			#DIV/0!																				#DIV/0!
			#DIV/0!																				#DIV/0!
			#DIV/0!																				#DIV/0!
			#DIV/0!																				#DIV/0!
			#DIV/0!																				#DIV/0!
			#DIV/0!																				#DIV/0!
			#DIV/0!																				#DIV/0!
			#DIV/0!																				#DIV/0!
			#DIV/0!																				#DIV/0!
	average		#DIV/0!																			ave	#DIV/0!
	sd		#DIV/0!																			n	0
	n		0																			sd	#DIV/0!
	se		#DIV/0!																			error	#DIV/0!
0
	101	#N/A		#N/A		#N/A		#N/A		#N/A		#N/A		#N/A		#N/A		#N/A		#N/A
	102	#N/A		#N/A		#N/A		#N/A		#N/A		#N/A		#N/A		#N/A		#N/A		#N/A
	103	#N/A		#N/A		#N/A		#N/A		#N/A		#N/A		#N/A		#N/A		#N/A		#N/A
	104	#N/A		#N/A		#N/A		#N/A		#N/A		#N/A		#N/A		#N/A		#N/A		#N/A
	105	#N/A		#N/A		#N/A		#N/A		#N/A		#N/A		#N/A		#N/A		#N/A		#N/A
	106	#N/A		#N/A		#N/A		#N/A		#N/A		#N/A		#N/A		#N/A		#N/A		#N/A
	107	#N/A		#N/A		#N/A		#N/A		#N/A		#N/A		#N/A		#N/A		#N/A		#N/A
	108	#N/A		#N/A		#N/A		#N/A		#N/A		#N/A		#N/A		#N/A		#N/A		#N/A
	109	#N/A		#N/A		#N/A		#N/A		#N/A		#N/A		#N/A		#N/A		#N/A		#N/A
	110	#N/A		#N/A		#N/A		#N/A		#N/A		#N/A		#N/A		#N/A		#N/A		#N/A
eggs per 24 h per female
			#DIV/0!																			sum	#DIV/0!
			#DIV/0!																				#DIV/0!
			#DIV/0!																				#DIV/0!
			#DIV/0!																				#DIV/0!
			#DIV/0!																				#DIV/0!
			#DIV/0!																				#DIV/0!
			#DIV/0!																				#DIV/0!
			#DIV/0!																				#DIV/0!
			#DIV/0!																				#DIV/0!
			#DIV/0!																				#DIV/0!
	average		#DIV/0!																			ave	#DIV/0!
	sd		#DIV/0!																			n	0
	n		0																			sd	#DIV/0!
	se		#DIV/0!																			error	#DIV/0!
(G4C2)36 RU+ 3mg/ml
	121	#N/A		#N/A		#N/A		#N/A		#N/A		#N/A		#N/A		#N/A		#N/A		#N/A
	122	#N/A		#N/A		#N/A		#N/A		#N/A		#N/A		#N/A		#N/A		#N/A		#N/A
	123	#N/A		#N/A		#N/A		#N/A		#N/A		#N/A		#N/A		#N/A		#N/A		#N/A
	124	#N/A		#N/A		#N/A		#N/A		#N/A		#N/A		#N/A		#N/A		#N/A		#N/A
	125	#N/A		#N/A		#N/A		#N/A		#N/A		#N/A		#N/A		#N/A		#N/A		#N/A
	126	#N/A		#N/A		#N/A		#N/A		#N/A		#N/A		#N/A		#N/A		#N/A		#N/A
	127	#N/A		#N/A		#N/A		#N/A		#N/A		#N/A		#N/A		#N/A		#N/A		#N/A
	128	#N/A		#N/A		#N/A		#N/A		#N/A		#N/A		#N/A		#N/A		#N/A		#N/A
	129	#N/A		#N/A		#N/A		#N/A		#N/A		#N/A		#N/A		#N/A		#N/A		#N/A
	130	#N/A		#N/A		#N/A		#N/A		#N/A		#N/A		#N/A		#N/A		#N/A		#N/A
eggs per 24 h per female
			#DIV/0!																			sum	#DIV/0!
			#DIV/0!																				#DIV/0!
			#DIV/0!																				#DIV/0!
			#DIV/0!																				#DIV/0!
			#DIV/0!																				#DIV/0!
			#DIV/0!																				#DIV/0!
			#DIV/0!																				#DIV/0!
			#DIV/0!																				#DIV/0!
			#DIV/0!																				#DIV/0!
			#DIV/0!																				#DIV/0!
	average		#DIV/0!																			ave	#DIV/0!
	sd		#DIV/0!																			n	0
	n		0																			sd	#DIV/0!
	se		#DIV/0!																			error	#DIV/0!
0.03mg/ml (G4C23)36 RU-
	141	#N/A		#N/A		#N/A		#N/A		#N/A		#N/A		#N/A		#N/A		#N/A		#N/A
	142	#N/A		#N/A		#N/A		#N/A		#N/A		#N/A		#N/A		#N/A		#N/A		#N/A
	143	#N/A		#N/A		#N/A		#N/A		#N/A		#N/A		#N/A		#N/A		#N/A		#N/A
	144	#N/A		#N/A		#N/A		#N/A		#N/A		#N/A		#N/A		#N/A		#N/A		#N/A
	145	#N/A		#N/A		#N/A		#N/A		#N/A		#N/A		#N/A		#N/A		#N/A		#N/A
	146	#N/A		#N/A		#N/A		#N/A		#N/A		#N/A		#N/A		#N/A		#N/A		#N/A
	147	#N/A		#N/A		#N/A		#N/A		#N/A		#N/A		#N/A		#N/A		#N/A		#N/A
	148	#N/A		#N/A		#N/A		#N/A		#N/A		#N/A		#N/A		#N/A		#N/A		#N/A
	149	#N/A		#N/A		#N/A		#N/A		#N/A		#N/A		#N/A		#N/A		#N/A		#N/A
	150	#N/A		#N/A		#N/A		#N/A		#N/A		#N/A		#N/A		#N/A		#N/A		#N/A
eggs per 24 h per female
			#DIV/0!																			sum	#DIV/0!
			#DIV/0!																				#DIV/0!
			#DIV/0!																				#DIV/0!
			#DIV/0!																				#DIV/0!
			#DIV/0!																				#DIV/0!
			#DIV/0!																				#DIV/0!
			#DIV/0!																				#DIV/0!
			#DIV/0!																				#DIV/0!
			#DIV/0!																				#DIV/0!
			#DIV/0!																				#DIV/0!
	average		#DIV/0!																			ave	#DIV/0!
	sd		#DIV/0!																			n	0
	n		0																			sd	#DIV/0!
	se		#DIV/0!																			error	#DIV/0!
-
	161	#N/A		#N/A		#N/A		#N/A		#N/A		#N/A		#N/A		#N/A		#N/A		#N/A
	162	#N/A		#N/A		#N/A		#N/A		#N/A		#N/A		#N/A		#N/A		#N/A		#N/A
	163	#N/A		#N/A		#N/A		#N/A		#N/A		#N/A		#N/A		#N/A		#N/A		#N/A
	164	#N/A		#N/A		#N/A		#N/A		#N/A		#N/A		#N/A		#N/A		#N/A		#N/A
	165	#N/A		#N/A		#N/A		#N/A		#N/A		#N/A		#N/A		#N/A		#N/A		#N/A
	166	#N/A		#N/A		#N/A		#N/A		#N/A		#N/A		#N/A		#N/A		#N/A		#N/A
	167	#N/A		#N/A		#N/A		#N/A		#N/A		#N/A		#N/A		#N/A		#N/A		#N/A
	168	#N/A		#N/A		#N/A		#N/A		#N/A		#N/A		#N/A		#N/A		#N/A		#N/A
	169	#N/A		#N/A		#N/A		#N/A		#N/A		#N/A		#N/A		#N/A		#N/A		#N/A
	170	#N/A		#N/A		#N/A		#N/A		#N/A		#N/A		#N/A		#N/A		#N/A		#N/A
eggs per 24 h per female
			#DIV/0!																			sum	#DIV/0!
			#DIV/0!																				#DIV/0!
			#DIV/0!																				#DIV/0!
			#DIV/0!																				#DIV/0!
			#DIV/0!																				#DIV/0!
			#DIV/0!																				#DIV/0!
			#DIV/0!																				#DIV/0!
			#DIV/0!																				#DIV/0!
			#DIV/0!																				#DIV/0!
			#DIV/0!																				#DIV/0!
	average		#DIV/0!																			ave	#DIV/0!
	sd		#DIV/0!																			n	0
	n		0																			sd	#DIV/0!
	se		#DIV/0!																			error	#DIV/0!
-
	181	#N/A		#N/A		#N/A		#N/A		#N/A		#N/A		#N/A		#N/A		#N/A		#N/A
	182	#N/A		#N/A		#N/A		#N/A		#N/A		#N/A		#N/A		#N/A		#N/A		#N/A
	183	#N/A		#N/A		#N/A		#N/A		#N/A		#N/A		#N/A		#N/A		#N/A		#N/A
	184	#N/A		#N/A		#N/A		#N/A		#N/A		#N/A		#N/A		#N/A		#N/A		#N/A
	185	#N/A		#N/A		#N/A		#N/A		#N/A		#N/A		#N/A		#N/A		#N/A		#N/A
	186	#N/A		#N/A		#N/A		#N/A		#N/A		#N/A		#N/A		#N/A		#N/A		#N/A
	187	#N/A		#N/A		#N/A		#N/A		#N/A		#N/A		#N/A		#N/A		#N/A		#N/A
	188	#N/A		#N/A		#N/A		#N/A		#N/A		#N/A		#N/A		#N/A		#N/A		#N/A
	189	#N/A		#N/A		#N/A		#N/A		#N/A		#N/A		#N/A		#N/A		#N/A		#N/A
	190	#N/A		#N/A		#N/A		#N/A		#N/A		#N/A		#N/A		#N/A		#N/A		#N/A
eggs per 24 h per female
			#DIV/0!																			sum	#DIV/0!
			#DIV/0!																				#DIV/0!
			#DIV/0!																				#DIV/0!
			#DIV/0!																				#DIV/0!
			#DIV/0!																				#DIV/0!
			#DIV/0!																				#DIV/0!
			#DIV/0!																				#DIV/0!
			#DIV/0!																				#DIV/0!
			#DIV/0!																				#DIV/0!
			#DIV/0!																				#DIV/0!
	average		#DIV/0!																			ave	#DIV/0!
	sd		#DIV/0!																			n	0
	n		0																			sd	#DIV/0!
	se		#DIV/0!																			error	#DIV/0!

## Sheet: popn per bottle
EXPERIMENT	Lifespan Insulin injection
CONDITION	PBS RU+(G4C2)36						sum deaths		126			censored		31								CONDITION	0						sum deaths		132			censored		#REF!
	1	2	3	4	5	6	7	8	9	10	11	12	13	14	15	16	17	18	19	20			101	102	103	104	105	106	107	108	109	110	111	112	113	114	115	116	117	118	119	120
dead	9	12	16	18	10	13	12	10	15	11	0	0	0	0	0	0	0	0	0	0		dead	17	10	13	12	14	15	15	14	13	9	0	0	0	0	0	0	0	0	0	0
censored	4	4	2	0	5	2	1	4	4	5	0	0	0	0	0	0	0	0	0	0		censored	0	2	0	#REF!	2	0	0	1	1	4	0	0	0	0	0	0	0	0	0	0
remaining per bottle	2	-1	-3	-3	0	0	2	1	-4	-1	15	15	15	15	15	15	15	15	15	15		remaining per bottle	-2	3	2	#REF!	-1	0	0	0	1	2	15	15	15	15	15	15	15	15	15	15
CONDITION	0.3 mg/ml RU- (G4C2)36						sum deaths		133			censored		7								CONDITION	(G4C2)36 RU+ 3mg/ml						sum deaths		105			censored		0
	21	22	23	24	25	26	27	28	29	30	31	32	33	34	35	36	37	38	39	40			121	122	123	124	125	126	127	128	129	130	131	132	133	134	135	136	137	138	139	140
dead	17	12	14	14	15	12	13	10	13	13	0	0	0	0	0	0	0	0	0	0		dead	13	15	15	16	15	15	16	0	0	0	0	0	0	0	0	0	0	0	0	0
censored	0	2	1	0	0	0	1	3	0	0	0	0	0	0	0	0	0	0	0	0		censored	0	0	0	0	0	0	0	0	0	0	0	0	0	0	0	0	0	0	0	0
remaining per bottle	-2	1	0	1	0	3	1	2	2	2	15	15	15	15	15	15	15	15	15	15		remaining per bottle	2	0	0	-1	0	0	-1	15	15	15	15	15	15	15	15	15	15	15	15	15
CONDITION	0.03 mh/ml RU+ (G4C2)36						sum deaths		83			censored		10								CONDITION	0.03mg/ml (G4C23)36 RU-						sum deaths		128			censored		13
	41	42	43	44	45	46	47	48	49	50	51	52	53	54	55	56	57	58	59	60			141	142	143	144	145	146	147	148	149	150	151	152	153	154	155	156	157	158	159	160
dead	9	14	11	11	14	12	12	0	0	0	0	0	0	0	0	0	0	0	0	0		dead	18	12	12	12	13	15	14	14	11	7	0	0	0	0	0	0	0	0	0	0
censored	1	1	2	2	2	0	2	0	0	0	0	0	0	0	0	0	0	0	0	0		censored	0	2	0	2	2	1	0	1	1	4	0	0	0	0	0	0	0	0	0	0
remaining per bottle	5	0	2	2	-1	3	1	15	15	15	15	15	15	15	15	15	15	15	15	15		remaining per bottle	-3	1	3	1	0	-1	1	0	3	4	15	15	15	15	15	15	15	15	15	15
CONDITION	PBS RU-(G4C2)36						sum deaths		70			censored		8								CONDITION	-						sum deaths		0			censored		0
	61	62	63	64	65	66	67	68	69	70	71	72	73	74	75	76	77	78	79	80			161	162	163	164	165	166	167	168	169	170	171	172	173	174	175	176	177	178	179	180
dead	15	13	16	11	13	2	0	0	0	0	0	0	0	0	0	0	0	0	0	0		dead	0	0	0	0	0	0	0	0	0	0	0	0	0	0	0	0	0	0	0	0
censored	1	1	0	4	2	0	0	0	0	0	0	0	0	0	0	0	0	0	0	0		censored	0	0	0	0	0	0	0	0	0	0	0	0	0	0	0	0	0	0	0	0
remaining per bottle	-1	1	-1	0	0	13	15	15	15	15	15	15	15	15	15	15	15	15	15	15		remaining per bottle	15	15	15	15	15	15	15	15	15	15	15	15	15	15	15	15	15	15	15	15
CONDITION	0.3mg/ml (G4C2)36 Ru+						sum deaths		142			censored		14								CONDITION	-						sum deaths		0			censored		0
	81	82	83	84	85	86	87	88	89	90	91	92	93	94	95	96	97	98	99	100			181	182	183	184	185	186	187	188	189	190	191	192	193	194	195	196	197	198	199	200
dead	14	13	15	15	16	13	11	14	13	18	0	0	0	0	0	0	0	0	0	0		dead	0	0	0	0	0	0	0	0	0	0	0	0	0	0	0	0	0	0	0	0
censored	1	1	1	0	1	1	4	1	3	1	0	0	0	0	0	0	0	0	0	0		censored	0	0	0	0	0	0	0	0	0	0	0	0	0	0	0	0	0	0	0	0
remaining per bottle	0	1	-1	0	-2	1	0	0	-1	-4	15	15	15	15	15	15	15	15	15	15		remaining per bottle	15	15	15	15	15	15	15	15	15	15	15	15	15	15	15	15	15	15	15	15

## Sheet: sheet(1)
EXPERIMENT	Lifespan Insulin injection																										Tipper:
DAY	2																										Date/time:
DATE	2020-08-12						time		1899-12-31 12:00:00																		Food:
CONDITION	PBS RU+(G4C2)36						sum deaths		0			censored		10								CONDITION	0						sum deaths		0			censored		8
	1	2	3	4	5	6	7	8	9	10	11	12	13	14	15	16	17	18	19	20			101	102	103	104	105	106	107	108	109	110	111	112	113	114	115	116	117	118	119	120
dead																						dead
carried over	1				2	1		3	2	1												carried over		1		1	1			1		4
censored	1				2	1		3	2	1												censored		1		1	1			1		4
CONDITION	0.3 mg/ml RU- (G4C2)36						sum deaths		0			censored		1								CONDITION	(G4C2)36 RU+ 3mg/ml		3 mg/ml				sum deaths		51			censored		0
	21	22	23	24	25	26	27	28	29	30	31	32	33	34	35	36	37	38	39	40			121	122	123	124	125	126	127	128	129	130	131	132	133	134	135	136	137	138	139	140
dead																						dead	7	4	9	8	9	6	8
carried over							1															carried over	2	1	3	4	3	2	4
censored							1															censored
CONDITION	0.03 mh/ml RU+ (G4C2)36						sum deaths		0			censored		4								CONDITION	0.03mg/ml (G4C23)36 RU-						sum deaths		0			censored		8
	41	42	43	44	45	46	47	48	49	50	51	52	53	54	55	56	57	58	59	60			141	142	143	144	145	146	147	148	149	150	151	152	153	154	155	156	157	158	159	160
dead																						dead
carried over		1	2	1																		carried over		1		1	1			1		4
censored		1	2	1																		censored		1		1	1			1		4
CONDITION	PBS RU-(G4C2)36						sum deaths		0			censored		6								CONDITION	-						sum deaths		0			censored		0
	61	62	63	64	65	66	67	68	69	70	71	72	73	74	75	76	77	78	79	80			161	162	163	164	165	166	167	168	169	170	171	172	173	174	175	176	177	178	179	180
dead																						dead
carried over	1	1		2	2																	carried over
censored	1	1		2	2																	censored
CONDITION	0.3mg/ml (G4C2)36 Ru+						sum deaths		0			censored		11								CONDITION	-						sum deaths		0			censored		0
	81	82	83	84	85	86	87	88	89	90	91	92	93	94	95	96	97	98	99	100			181	182	183	184	185	186	187	188	189	190	191	192	193	194	195	196	197	198	199	200
dead																						dead
carried over		1	1		1	1	4		2	1												carried over
censored		1	1		1	1	4		2	1												censored

[truncated: 74 more sheets: sheet(2), sheet(3), sheet(4), sheet(5), sheet(6), sheet(7), sheet(8), sheet(9), sheet(10), sheet(11), sheet(12), sheet(13), sheet (14), sheet (15), sheet (16), sheet (17), sheet (18), sheet (19), sheet (20), sheet (21) …]
