# Supplementary material for: Enhanced insulin signalling ameliorates C9orf72 hexanucleotide repeat expansion toxicity in Drosophila
Source: eLife journal article supplement (doi:10.7554/elife.58565), 2021-03-19
Supplement: supp [file elife-58565-supp-v1.zip › elife_poa_e58565_Figure_6_figure_supplement_1_source_data_2.xls]

## Sheet: summary
experiment	(G4C2)/+ insulin injection 0.03 mg/ml			start	2018-07-04
notes				day	date	day	date	day	date	day	date
				1	2018-07-05	26	2018-07-30	51	2018-08-24	76	2018-09-18
				2	2018-07-06	27	2018-07-31	52	2018-08-25	77	2018-09-19
				3	2018-07-07	28	2018-08-01	53	2018-08-26	78	2018-09-20
				4	2018-07-08	29	2018-08-02	54	2018-08-27	79	2018-09-21
				5	2018-07-09	30	2018-08-03	55	2018-08-28	80	2018-09-22
				6	2018-07-10	31	2018-08-04	56	2018-08-29	81	2018-09-23
				7	2018-07-11	32	2018-08-05	57	2018-08-30	82	2018-09-24
				8	2018-07-12	33	2018-08-06	58	2018-08-31	83	2018-09-25
				9	2018-07-13	34	2018-08-07	59	2018-09-01	84	2018-09-26
				10	2018-07-14	35	2018-08-08	60	2018-09-02	85	2018-09-27
				11	2018-07-15	36	2018-08-09	61	2018-09-03	86	2018-09-28
				12	2018-07-16	37	2018-08-10	62	2018-09-04	87	2018-09-29
				13	2018-07-17	38	2018-08-11	63	2018-09-05	88	2018-09-30
				14	2018-07-18	39	2018-08-12	64	2018-09-06	89	2018-10-01
				15	2018-07-19	40	2018-08-13	65	2018-09-07	90	2018-10-02
				16	2018-07-20	41	2018-08-14	66	2018-09-08	91	2018-10-03
				17	2018-07-21	42	2018-08-15	67	2018-09-09	92	2018-10-04
				18	2018-07-22	43	2018-08-16	68	2018-09-10	93	2018-10-05
				19	2018-07-23	44	2018-08-17	69	2018-09-11	94	2018-10-06
				20	2018-07-24	45	2018-08-18	70	2018-09-12	95	2018-10-07
				21	2018-07-25	46	2018-08-19	71	2018-09-13	96	2018-10-08
				22	2018-07-26	47	2018-08-20	72	2018-09-14	97	2018-10-09
				23	2018-07-27	48	2018-08-21	73	2018-09-15	98	2018-10-10
				24	2018-07-28	49	2018-08-22	74	2018-09-16	99	2018-10-11
				25	2018-07-29	50	2018-08-23	75	2018-09-17	100	2018-10-12
	1	2	3	4	5	6	7	8	9	10
condition	(G4C2)36/+ PBS RU-	(G4C2)36/+ INS RU-	(G4C2)36/+ PBS RU+	(G4C2)36 INS RU+	condition e	condition f	condition g	condition h	condition i	condition j
container	vials	vials	vials	vials	vials	vials	vials	vials	vials	vials
flies per container	15	15	15	15	10	10	10	10	10	10
# containers	5	5	5	5	10	10	10	10	10	10
calculated start #	75	75	75	75	100	100	100	100	100	100
total deaths	63	70	71	67	0	0	0	0	0	0
total censors	8	2	7	11	0	0	0	0	0	0
actual start #	71	72	78	78	0	0	0	0	0	0
condition	(G4C2)36/+ PBS RU-	(G4C2)36/+ INS RU-	(G4C2)36/+ PBS RU+	(G4C2)36 INS RU+	condition e	condition f	condition g	condition h	condition i	condition j	condition
gender	female	female	female	female	female	female	female	female	female	female	gender
mating status	mated 48h	mated 48h	mated 48h	mated 48h	mated 48h	mated 48h	mated 48h	mated 48h	mated 48h	mated 48h	mating status
Wolbachia infected	Yes	Yes	Yes	Yes	Yes	Yes	Yes	Yes	Yes	Yes	Wolbachia infected
temperature	25 C	25 C	25 C	25 C	25 C	25 C	25 C	25 C	25 C	25 C	temperature
base food	1 SY	1 SY	1 SY	1 SY	1 SY	1 SY	1 SY	1 SY	1 SY	1 SY	base food
yeast batch											yeast batch
food addition											food addition
other envir. descriptor 1											other envir. descriptor 1
other envir. descriptor 2											other envir. descriptor 2
other envir. descriptor 3											other envir. descriptor 3
background / strain	Dahomey	Dahomey	Dahomey	Dahomey	Dahomey	Dahomey	Dahomey	Dahomey	Dahomey	Dahomey	background / strain
genetic alteration 1											genetic alteration 1
genetic alteration 2											genetic alteration 2
genetic alteration 3											genetic alteration 3

## Sheet: stats
(G4C2)/+ insulin injection 0.03 mg/ml				note: values will only be accurate at the end of the experiment
chi-squared values
		(G4C2)36/+ PBS RU-	(G4C2)36/+ INS RU-	(G4C2)36/+ PBS RU+	(G4C2)36 INS RU+	condition e	condition f	condition g	condition h	condition i	condition j
	(G4C2)36/+ PBS RU-		7.1939	116.486	109.173	#DIV/0!	#DIV/0!	#DIV/0!	#DIV/0!	#DIV/0!	#DIV/0!
	(G4C2)36/+ INS RU-			122.624	111.043	#DIV/0!	#DIV/0!	#DIV/0!	#DIV/0!	#DIV/0!	#DIV/0!
	(G4C2)36/+ PBS RU+				4.36548	#DIV/0!	#DIV/0!	#DIV/0!	#DIV/0!	#DIV/0!	#DIV/0!
	(G4C2)36 INS RU+					#DIV/0!	#DIV/0!	#DIV/0!	#DIV/0!	#DIV/0!	#DIV/0!
	condition e						#DIV/0!	#DIV/0!	#DIV/0!	#DIV/0!	#DIV/0!
	condition f							#DIV/0!	#DIV/0!	#DIV/0!	#DIV/0!
	condition g								#DIV/0!	#DIV/0!	#DIV/0!
	condition h									#DIV/0!	#DIV/0!
	condition i										#DIV/0!
	condition j
chi-squared p-value for log-rank test on survivorship data
		(G4C2)36/+ PBS RU-	(G4C2)36/+ INS RU-	(G4C2)36/+ PBS RU+	(G4C2)36 INS RU+	condition e	condition f	condition g	condition h	condition i	condition j
	median (d)	60	57.5	17.5	22	0	0	0	0	0	0
	mean (d)	59.2235	55.9667	16.9487	19.7145	0	0	0	0	0	0
	maximum (d)	76	66.5	0	0	0	0	0	0	0	0
	(G4C2)36/+ PBS RU-		0.00731517	3.72017e-27	1.48695e-25	#DIV/0!	#DIV/0!	#DIV/0!	#DIV/0!	#DIV/0!	#DIV/0!
	(G4C2)36/+ INS RU-			1.68504e-28	5.79156e-26	#DIV/0!	#DIV/0!	#DIV/0!	#DIV/0!	#DIV/0!	#DIV/0!
	(G4C2)36/+ PBS RU+				0.0366742	#DIV/0!	#DIV/0!	#DIV/0!	#DIV/0!	#DIV/0!	#DIV/0!
	(G4C2)36 INS RU+					#DIV/0!	#DIV/0!	#DIV/0!	#DIV/0!	#DIV/0!	#DIV/0!
	condition e						#DIV/0!	#DIV/0!	#DIV/0!	#DIV/0!	#DIV/0!
	condition f							#DIV/0!	#DIV/0!	#DIV/0!	#DIV/0!
	condition g								#DIV/0!	#DIV/0!	#DIV/0!
	condition h									#DIV/0!	#DIV/0!
	condition i										#DIV/0!
	condition j

## Sheet: cumulative dths per bottle
			deaths
				bottle number
	date	time	day	1	2	3	4	5	6	7	8	9	10	11	12	13	14	15	16	17	18	19	20	21	22	23	24	25	26	27	28	29	30	31	32	33	34	35	36	37	38	39	40	41	42	43	44	45	46
	2018-07-04	1899-12-31 12:00:00		15	14	12	15	15	0	0	0	0	0	0	0	0	0	0	0	0	0	0	0	17	14	14	14	13	0	0	0	0	0	0	0	0	0	0	0	0	0	0	0	12	12	12	17	21	4
1	2018-07-04	1899-12-31 12:00:00	0	0	0	0	0	0	0	0	0	0	0	0	0	0	0	0	0	0	0	0	0	0	0	0	0	0	0	0	0	0	0	0	0	0	0	0	0	0	0	0	0	0	0	0	0	0	0
2	2018-07-06	1899-12-31 12:00:00	2	0	0	0	0	0	0	0	0	0	0	0	0	0	0	0	0	0	0	0	0	0	0	0	0	0	0	0	0	0	0	0	0	0	0	0	0	0	0	0	0	0	0	0	0	0	0
3	2018-07-09	1899-12-31 12:00:00	5	0	0	0	0	0	0	0	0	0	0	0	0	0	0	0	0	0	0	0	0	0	0	0	0	0	0	0	0	0	0	0	0	0	0	0	0	0	0	0	0	0	0	0	0	1	0
4	2018-07-11	1899-12-31 12:00:00	7	0	0	0	0	0	0	0	0	0	0	0	0	0	0	0	0	0	0	0	0	0	0	0	0	0	0	0	0	0	0	0	0	0	0	0	0	0	0	0	0	0	0	0	0	0	0
5	2018-07-13	1899-12-31 12:00:00	9	0	0	0	0	1	0	0	0	0	0	0	0	0	0	0	0	0	0	0	0	1	0	0	0	0	0	0	0	0	0	0	0	0	0	0	0	0	0	0	0	3	2	3	0	1	4
6	2018-07-16	1899-12-31 12:00:00	12	0	0	0	0	0	0	0	0	0	0	0	0	0	0	0	0	0	0	0	0	0	0	0	0	0	0	0	0	0	0	0	0	0	0	0	0	0	0	0	0	3	1	2	4	3	0
7	2018-07-18	1899-12-31 12:00:00	14	0	0	0	0	0	0	0	0	0	0	0	0	0	0	0	0	0	0	0	0	0	0	0	0	0	0	0	0	0	0	0	0	0	0	0	0	0	0	0	0	1	2	0	1	0	0
8	2018-07-20	1899-12-31 12:00:00	16	1	0	0	0	0	0	0	0	0	0	0	0	0	0	0	0	0	0	0	0	0	0	0	0	0	0	0	0	0	0	0	0	0	0	0	0	0	0	0	0	0	0	0	0	1	0
9	2018-07-23	1899-12-31 12:00:00	19	0	0	0	0	0	0	0	0	0	0	0	0	0	0	0	0	0	0	0	0	0	0	0	0	0	0	0	0	0	0	0	0	0	0	0	0	0	0	0	0	1	2	3	2	0	0
10	2018-07-25	1899-12-31 12:00:00	21	0	0	0	0	0	0	0	0	0	0	0	0	0	0	0	0	0	0	0	0	0	0	0	0	0	0	0	0	0	0	0	0	0	0	0	0	0	0	0	0	0	0	1	2	1	0
11	2018-07-27	1899-12-31 12:00:00	23	0	0	0	0	0	0	0	0	0	0	0	0	0	0	0	0	0	0	0	0	0	0	0	0	0	0	0	0	0	0	0	0	0	0	0	0	0	0	0	0	1	3	0	0	3	0
12	2018-07-30	1899-12-31 12:00:00	26	0	0	0	0	0	0	0	0	0	0	0	0	0	0	0	0	0	0	0	0	0	0	0	0	0	0	0	0	0	0	0	0	0	0	0	0	0	0	0	0	2	0	2	1	1	0
13	2018-08-01	1899-12-31 12:00:00	28	0	0	0	0	0	0	0	0	0	0	0	0	0	0	0	0	0	0	0	0	0	0	1	0	0	0	0	0	0	0	0	0	0	0	0	0	0	0	0	0	0	1	0	0	4	0
14	2018-08-03	1899-12-31 12:00:00	30	0	0	0	0	0	0	0	0	0	0	0	0	0	0	0	0	0	0	0	0	0	0	0	0	0	0	0	0	0	0	0	0	0	0	0	0	0	0	0	0	1	0	1	0	4	0
15	2018-08-06	1899-12-31 12:00:00	33	0	0	0	0	0	0	0	0	0	0	0	0	0	0	0	0	0	0	0	0	0	0	0	1	0	0	0	0	0	0	0	0	0	0	0	0	0	0	0	0	0	1	0	0	2	0
16	2018-08-08	1899-12-31 12:00:00	35	0	0	0	0	0	0	0	0	0	0	0	0	0	0	0	0	0	0	0	0	0	0	0	0	0	0	0	0	0	0	0	0	0	0	0	0	0	0	0	0	0	0	0	0	0	0
17	2018-08-10	1899-12-31 12:00:00	37	0	0	0	0	0	0	0	0	0	0	0	0	0	0	0	0	0	0	0	0	0	0	0	0	0	0	0	0	0	0	0	0	0	0	0	0	0	0	0	0	0	0	0	0	0	0
18	2018-08-13	1899-12-31 12:00:00	40	0	0	0	0	0	0	0	0	0	0	0	0	0	0	0	0	0	0	0	0	0	0	0	0	0	0	0	0	0	0	0	0	0	0	0	0	0	0	0	0	0	0	0	0	0	0
19	2018-08-15	1899-12-31 12:00:00	42	0	0	0	0	0	0	0	0	0	0	0	0	0	0	0	0	0	0	0	0	1	0	0	0	1	0	0	0	0	0	0	0	0	0	0	0	0	0	0	0	0	0	0	0	0	0
20	2018-08-17	1899-12-31 12:00:00	44	0	0	0	0	1	0	0	0	0	0	0	0	0	0	0	0	0	0	0	0	0	0	0	0	0	0	0	0	0	0	0	0	0	0	0	0	0	0	0	0	0	0	0	0	0	0
21	2018-08-20	1899-12-31 12:00:00	47	0	2	1	3	0	0	0	0	0	0	0	0	0	0	0	0	0	0	0	0	3	0	2	2	0	0	0	0	0	0	0	0	0	0	0	0	0	0	0	0	0	0	0	0	0	0
22	2018-08-22	1899-12-31 12:00:00	49	0	0	1	1	0	0	0	0	0	0	0	0	0	0	0	0	0	0	0	0	2	0	1	1	3	0	0	0	0	0	0	0	0	0	0	0	0	0	0	0	0	0	0	0	0	0
23	2018-08-24	1899-12-31 12:00:00	51	0	0	4	0	2	0	0	0	0	0	0	0	0	0	0	0	0	0	0	0	0	0	0	0	0	0	0	0	0	0	0	0	0	0	0	0	0	0	0	0	0	0	0	0	0	0
24	2018-08-27	1899-12-31 12:00:00	54	1	2	0	0	1	0	0	0	0	0	0	0	0	0	0	0	0	0	0	0	3	3	2	1	2	0	0	0	0	0	0	0	0	0	0	0	0	0	0	0	0	0	0	0	0	0
25	2018-08-29	1899-12-31 12:00:00	56	1	1	0	0	2	0	0	0	0	0	0	0	0	0	0	0	0	0	0	0	2	1	1	0	1	0	0	0	0	0	0	0	0	0	0	0	0	0	0	0	0	0	0	0	0	0
26	2018-09-01	1899-12-31 12:00:00	59	1	0	0	3	0	0	0	0	0	0	0	0	0	0	0	0	0	0	0	0	1	0	1	0	2	0	0	0	0	0	0	0	0	0	0	0	0	0	0	0	0	0	0	0	0	0
27	2018-09-03	1899-12-31 12:00:00	61	0	1	1	3	2	0	0	0	0	0	0	0	0	0	0	0	0	0	0	0	1	8	3	3	2	0	0	0	0	0	0	0	0	0	0	0	0	0	0	0	0	0	0	0	0	0
28	2018-09-05	1899-12-31 12:00:00	63	0	0	0	0	0	0	0	0	0	0	0	0	0	0	0	0	0	0	0	0	2	1	0	1	0	0	0	0	0	0	0	0	0	0	0	0	0	0	0	0	0	0	0	0	0	0
29	2018-09-07	1899-12-31 12:00:00	65	3	2	0	2	3	0	0	0	0	0	0	0	0	0	0	0	0	0	0	0	0	0	0	1	0	0	0	0	0	0	0	0	0	0	0	0	0	0	0	0	0	0	0	0	0	0
30	2018-09-10	1899-12-31 12:00:00	68	3	0	1	1	0	0	0	0	0	0	0	0	0	0	0	0	0	0	0	0	1	0	1	2	1	0	0	0	0	0	0	0	0	0	0	0	0	0	0	0	0	0	0	0	0	0
31	2018-09-12	1899-12-31 12:00:00	70	3	0	0	0	2	0	0	0	0	0	0	0	0	0	0	0	0	0	0	0	0	1	1	0	0	0	0	0	0	0	0	0	0	0	0	0	0	0	0	0	0	0	0	0	0	0
32	2018-09-14	1899-12-31 12:00:00	72	1	2	0	0	0	0	0	0	0	0	0	0	0	0	0	0	0	0	0	0	0	0	0	1	0	0	0	0	0	0	0	0	0	0	0	0	0	0	0	0	0	0	0	0	0	0
33	2018-09-17	1899-12-31 12:00:00	75	0	0	0	0	0	0	0	0	0	0	0	0	0	0	0	0	0	0	0	0	0	0	0	0	1	0	0	0	0	0	0	0	0	0	0	0	0	0	0	0	0	0	0	0	0	0
34	2018-09-19	1899-12-31 12:00:00	77	0	2	0	0	1	0	0	0	0	0	0	0	0	0	0	0	0	0	0	0	0	0	0	0	0	0	0	0	0	0	0	0	0	0	0	0	0	0	0	0	0	0	0	0	0	0
35	2018-09-21	1899-12-31 12:00:00	79	0	1	0	0	0	0	0	0	0	0	0	0	0	0	0	0	0	0	0	0	0	0	0	0	0	0	0	0	0	0	0	0	0	0	0	0	0	0	0	0	0	0	0	0	0	0
36	2000-01-01	1899-12-31 12:00:00	79	0	0	0	0	0	0	0	0	0	0	0	0	0	0	0	0	0	0	0	0	0	0	0	0	0	0	0	0	0	0	0	0	0	0	0	0	0	0	0	0	0	0	0	0	0	0
37	2000-01-01	1899-12-31 12:00:00	79	0	0	0	0	0	0	0	0	0	0	0	0	0	0	0	0	0	0	0	0	0	0	0	0	0	0	0	0	0	0	0	0	0	0	0	0	0	0	0	0	0	0	0	0	0	0
38	2000-01-01	1899-12-31 12:00:00	79	0	0	0	0	0	0	0	0	0	0	0	0	0	0	0	0	0	0	0	0	0	0	0	0	0	0	0	0	0	0	0	0	0	0	0	0	0	0	0	0	0	0	0	0	0	0
39	2000-01-01	1899-12-31 12:00:00	79	0	0	0	0	0	0	0	0	0	0	0	0	0	0	0	0	0	0	0	0	0	0	0	0	0	0	0	0	0	0	0	0	0	0	0	0	0	0	0	0	0	0	0	0	0	0
40	2000-01-01	1899-12-31 12:00:00	79	0	0	0	0	0	0	0	0	0	0	0	0	0	0	0	0	0	0	0	0	0	0	0	0	0	0	0	0	0	0	0	0	0	0	0	0	0	0	0	0	0	0	0	0	0	0
41	2000-01-01	1899-12-31 12:00:00	79	0	0	0	0	0	0	0	0	0	0	0	0	0	0	0	0	0	0	0	0	0	0	0	0	0	0	0	0	0	0	0	0	0	0	0	0	0	0	0	0	0	0	0	0	0	0
42	2000-01-01	1899-12-31 12:00:00	79	0	0	0	0	0	0	0	0	0	0	0	0	0	0	0	0	0	0	0	0	0	0	0	0	0	0	0	0	0	0	0	0	0	0	0	0	0	0	0	0	0	0	0	0	0	0
43	2000-01-01	1899-12-31 12:00:00	79	0	0	0	0	0	0	0	0	0	0	0	0	0	0	0	0	0	0	0	0	0	0	0	0	0	0	0	0	0	0	0	0	0	0	0	0	0	0	0	0	0	0	0	0	0	0
44	2000-01-01	1899-12-31 12:00:00	79	0	0	0	0	0	0	0	0	0	0	0	0	0	0	0	0	0	0	0	0	0	0	0	0	0	0	0	0	0	0	0	0	0	0	0	0	0	0	0	0	0	0	0	0	0	0
45	2000-01-01	1899-12-31 12:00:00	79	0	0	0	0	0	0	0	0	0	0	0	0	0	0	0	0	0	0	0	0	0	0	0	0	0	0	0	0	0	0	0	0	0	0	0	0	0	0	0	0	0	0	0	0	0	0
46	2000-01-01	1899-12-31 12:00:00	79	0	0	0	0	0	0	0	0	0	0	0	0	0	0	0	0	0	0	0	0	0	0	0	0	0	0	0	0	0	0	0	0	0	0	0	0	0	0	0	0	0	0	0	0	0	0
47	2000-01-01	1899-12-31 12:00:00	79	0	0	0	0	0	0	0	0	0	0	0	0	0	0	0	0	0	0	0	0	0	0	0	0	0	0	0	0	0	0	0	0	0	0	0	0	0	0	0	0	0	0	0	0	0	0
48	2000-01-01	1899-12-31 12:00:00	79	0	0	0	0	0	0	0	0	0	0	0	0	0	0	0	0	0	0	0	0	0	0	0	0	0	0	0	0	0	0	0	0	0	0	0	0	0	0	0	0	0	0	0	0	0	0
49	2000-01-01	1899-12-31 12:00:00	79	0	0	0	0	0	0	0	0	0	0	0	0	0	0	0	0	0	0	0	0	0	0	0	0	0	0	0	0	0	0	0	0	0	0	0	0	0	0	0	0	0	0	0	0	0	0
50	2000-01-01	1899-12-31 12:00:00	79	0	0	0	0	0	0	0	0	0	0	0	0	0	0	0	0	0	0	0	0	0	0	0	0	0	0	0	0	0	0	0	0	0	0	0	0	0	0	0	0	0	0	0	0	0	0
51	2000-01-01	1899-12-31 12:00:00	79	0	0	0	0	0	0	0	0	0	0	0	0	0	0	0	0	0	0	0	0	0	0	0	0	0	0	0	0	0	0	0	0	0	0	0	0	0	0	0	0	0	0	0	0	0	0
52	2000-01-01	1899-12-31 12:00:00	79	0	0	0	0	0	0	0	0	0	0	0	0	0	0	0	0	0	0	0	0	0	0	0	0	0	0	0	0	0	0	0	0	0	0	0	0	0	0	0	0	0	0	0	0	0	0
53	2000-01-01	1899-12-31 12:00:00	79	0	0	0	0	0	0	0	0	0	0	0	0	0	0	0	0	0	0	0	0	0	0	0	0	0	0	0	0	0	0	0	0	0	0	0	0	0	0	0	0	0	0	0	0	0	0
54	2000-01-01	1899-12-31 12:00:00	79	0	0	0	0	0	0	0	0	0	0	0	0	0	0	0	0	0	0	0	0	0	0	0	0	0	0	0	0	0	0	0	0	0	0	0	0	0	0	0	0	0	0	0	0	0	0
55	2000-01-01	1899-12-31 12:00:00	79	0	0	0	0	0	0	0	0	0	0	0	0	0	0	0	0	0	0	0	0	0	0	0	0	0	0	0	0	0	0	0	0	0	0	0	0	0	0	0	0	0	0	0	0	0	0
56	2000-01-01	1899-12-31 12:00:00	79	0	0	0	0	0	0	0	0	0	0	0	0	0	0	0	0	0	0	0	0	0	0	0	0	0	0	0	0	0	0	0	0	0	0	0	0	0	0	0	0	0	0	0	0	0	0
57	2000-01-01	1899-12-31 12:00:00	79	0	0	0	0	0	0	0	0	0	0	0	0	0	0	0	0	0	0	0	0	0	0	0	0	0	0	0	0	0	0	0	0	0	0	0	0	0	0	0	0	0	0	0	0	0	0
58	2000-01-01	1899-12-31 12:00:00	79	0	0	0	0	0	0	0	0	0	0	0	0	0	0	0	0	0	0	0	0	0	0	0	0	0	0	0	0	0	0	0	0	0	0	0	0	0	0	0	0	0	0	0	0	0	0
59	2000-01-01	1899-12-31 12:00:00	79	0	0	0	0	0	0	0	0	0	0	0	0	0	0	0	0	0	0	0	0	0	0	0	0	0	0	0	0	0	0	0	0	0	0	0	0	0	0	0	0	0	0	0	0	0	0
60	2000-01-01	1899-12-31 12:00:00	79	0	0	0	0	0	0	0	0	0	0	0	0	0	0	0	0	0	0	0	0	0	0	0	0	0	0	0	0	0	0	0	0	0	0	0	0	0	0	0	0	0	0	0	0	0	0
61	2000-01-01	1899-12-31 12:00:00	79	0	0	0	0	0	0	0	0	0	0	0	0	0	0	0	0	0	0	0	0	0	0	0	0	0	0	0	0	0	0	0	0	0	0	0	0	0	0	0	0	0	0	0	0	0	0
62	2000-01-01	1899-12-31 12:00:00	79	0	0	0	0	0	0	0	0	0	0	0	0	0	0	0	0	0	0	0	0	0	0	0	0	0	0	0	0	0	0	0	0	0	0	0	0	0	0	0	0	0	0	0	0	0	0
63	2000-01-01	1899-12-31 12:00:00	79	0	0	0	0	0	0	0	0	0	0	0	0	0	0	0	0	0	0	0	0	0	0	0	0	0	0	0	0	0	0	0	0	0	0	0	0	0	0	0	0	0	0	0	0	0	0
64	2000-01-01	1899-12-31 12:00:00	79	0	0	0	0	0	0	0	0	0	0	0	0	0	0	0	0	0	0	0	0	0	0	0	0	0	0	0	0	0	0	0	0	0	0	0	0	0	0	0	0	0	0	0	0	0	0
65	2000-01-01	1899-12-31 12:00:00	79	0	0	0	0	0	0	0	0	0	0	0	0	0	0	0	0	0	0	0	0	0	0	0	0	0	0	0	0	0	0	0	0	0	0	0	0	0	0	0	0	0	0	0	0	0	0
66	2000-01-01	1899-12-31 12:00:00	79	0	0	0	0	0	0	0	0	0	0	0	0	0	0	0	0	0	0	0	0	0	0	0	0	0	0	0	0	0	0	0	0	0	0	0	0	0	0	0	0	0	0	0	0	0	0
67	2000-01-01	1899-12-31 12:00:00	79	0	0	0	0	0	0	0	0	0	0	0	0	0	0	0	0	0	0	0	0	0	0	0	0	0	0	0	0	0	0	0	0	0	0	0	0	0	0	0	0	0	0	0	0	0	0
68	2000-01-01	1899-12-31 12:00:00	79	0	0	0	0	0	0	0	0	0	0	0	0	0	0	0	0	0	0	0	0	0	0	0	0	0	0	0	0	0	0	0	0	0	0	0	0	0	0	0	0	0	0	0	0	0	0
69	2000-01-01	1899-12-31 12:00:00	79	0	0	0	0	0	0	0	0	0	0	0	0	0	0	0	0	0	0	0	0	0	0	0	0	0	0	0	0	0	0	0	0	0	0	0	0	0	0	0	0	0	0	0	0	0	0
70	2000-01-01	1899-12-31 12:00:00	79	0	0	0	0	0	0	0	0	0	0	0	0	0	0	0	0	0	0	0	0	0	0	0	0	0	0	0	0	0	0	0	0	0	0	0	0	0	0	0	0	0	0	0	0	0	0
71	2000-01-01	1899-12-31 12:00:00	79	0	0	0	0	0	0	0	0	0	0	0	0	0	0	0	0	0	0	0	0	0	0	0	0	0	0	0	0	0	0	0	0	0	0	0	0	0	0	0	0	0	0	0	0	0	0
72	2000-01-01	1899-12-31 12:00:00	79	0	0	0	0	0	0	0	0	0	0	0	0	0	0	0	0	0	0	0	0	0	0	0	0	0	0	0	0	0	0	0	0	0	0	0	0	0	0	0	0	0	0	0	0	0	0
73	2000-01-01	1899-12-31 12:00:00	79	0	0	0	0	0	0	0	0	0	0	0	0	0	0	0	0	0	0	0	0	0	0	0	0	0	0	0	0	0	0	0	0	0	0	0	0	0	0	0	0	0	0	0	0	0	0
74	2000-01-01	1899-12-31 12:00:00	79	0	0	0	0	0	0	0	0	0	0	0	0	0	0	0	0	0	0	0	0	0	0	0	0	0	0	0	0	0	0	0	0	0	0	0	0	0	0	0	0	0	0	0	0	0	0
75	2000-01-01	1899-12-31 12:00:00	79	0	0	0	0	0	0	0	0	0	0	0	0	0	0	0	0	0	0	0	0	0	0	0	0	0	0	0	0	0	0	0	0	0	0	0	0	0	0	0	0	0	0	0	0	0	0
				14	13	8	13	15	0	0	0	0	0	0	0	0	0	0	0	0	0	0	0	17	14	13	13	13	0	0	0	0	0	0	0	0	0	0	0	0	0	0	0	12	12	12	10	21	4
		censors
				1	2	3	4	5	6	7	8	9	10	11	12	13	14	15	16	17	18	19	20	21	22	23	24	25	26	27	28	29	30	31	32	33	34	35	36	37	38	39	40	41	42	43	44	45	46
1	2018-07-04	1899-12-31 12:00:00	0	0	0	0	0	0	0	0	0	0	0	0	0	0	0	0	0	0	0	0	0	0	0	0	0	0	0	0	0	0	0	0	0	0	0	0	0	0	0	0	0	0	0	0	0	0	0
2	2018-07-06	1899-12-31 12:00:00	2	1	0	0	2	0	0	0	0	0	0	0	0	0	0	0	0	0	0	0	0	0	0	0	1	0	0	0	0	0	0	0	0	0	0	0	0	0	0	0	0	0	0	0	0	0	0
3	2018-07-09	1899-12-31 12:00:00	5	0	0	0	0	0	0	0	0	0	0	0	0	0	0	0	0	0	0	0	0	0	0	0	0	0	0	0	0	0	0	0	0	0	0	0	0	0	0	0	0	0	0	0	0	0	0
4	2018-07-11	1899-12-31 12:00:00	7	0	0	0	0	0	0	0	0	0	0	0	0	0	0	0	0	0	0	0	0	0	0	0	0	0	0	0	0	0	0	0	0	0	0	0	0	0	0	0	0	0	0	0	0	0	0
5	2018-07-13	1899-12-31 12:00:00	9	0	0	0	0	0	0	0	0	0	0	0	0	0	0	0	0	0	0	0	0	0	0	1	0	0	0	0	0	0	0	0	0	0	0	0	0	0	0	0	0	0	0	0	0	0	0
6	2018-07-16	1899-12-31 12:00:00	12	0	0	0	0	0	0	0	0	0	0	0	0	0	0	0	0	0	0	0	0	0	0	0	0	0	0	0	0	0	0	0	0	0	0	0	0	0	0	0	0	0	0	0	0	0	0
7	2018-07-18	1899-12-31 12:00:00	14	0	0	0	0	0	0	0	0	0	0	0	0	0	0	0	0	0	0	0	0	0	0	0	0	0	0	0	0	0	0	0	0	0	0	0	0	0	0	0	0	0	0	0	0	0	0
8	2018-07-20	1899-12-31 12:00:00	16	0	1	0	0	0	0	0	0	0	0	0	0	0	0	0	0	0	0	0	0	0	0	0	0	0	0	0	0	0	0	0	0	0	0	0	0	0	0	0	0	0	0	0	0	0	0
9	2018-07-23	1899-12-31 12:00:00	19	0	0	0	0	0	0	0	0	0	0	0	0	0	0	0	0	0	0	0	0	0	0	0	0	0	0	0	0	0	0	0	0	0	0	0	0	0	0	0	0	0	0	0	0	0	0
10	2018-07-25	1899-12-31 12:00:00	21	0	0	1	0	0	0	0	0	0	0	0	0	0	0	0	0	0	0	0	0	0	0	0	0	0	0	0	0	0	0	0	0	0	0	0	0	0	0	0	0	0	0	0	0	0	0
11	2018-07-27	1899-12-31 12:00:00	23	0	0	0	0	0	0	0	0	0	0	0	0	0	0	0	0	0	0	0	0	0	0	0	0	0	0	0	0	0	0	0	0	0	0	0	0	0	0	0	0	0	0	0	0	0	0
12	2018-07-30	1899-12-31 12:00:00	26	0	0	0	0	0	0	0	0	0	0	0	0	0	0	0	0	0	0	0	0	0	0	0	0	0	0	0	0	0	0	0	0	0	0	0	0	0	0	0	0	0	0	0	0	0	0
13	2018-08-01	1899-12-31 12:00:00	28	0	0	1	0	0	0	0	0	0	0	0	0	0	0	0	0	0	0	0	0	0	0	0	0	0	0	0	0	0	0	0	0	0	0	0	0	0	0	0	0	0	0	0	0	0	0
14	2018-08-03	1899-12-31 12:00:00	30	0	0	0	0	0	0	0	0	0	0	0	0	0	0	0	0	0	0	0	0	0	0	0	0	0	0	0	0	0	0	0	0	0	0	0	0	0	0	0	0	0	0	0	0	0	0
15	2018-08-06	1899-12-31 12:00:00	33	0	0	1	0	0	0	0	0	0	0	0	0	0	0	0	0	0	0	0	0	0	0	0	0	0	0	0	0	0	0	0	0	0	0	0	0	0	0	0	0	0	0	0	7	0	0
16	2018-08-08	1899-12-31 12:00:00	35	0	0	0	0	0	0	0	0	0	0	0	0	0	0	0	0	0	0	0	0	0	0	0	0	0	0	0	0	0	0	0	0	0	0	0	0	0	0	0	0	0	0	0	0	0	0
17	2018-08-10	1899-12-31 12:00:00	37	0	0	0	0	0	0	0	0	0	0	0	0	0	0	0	0	0	0	0	0	0	0	0	0	0	0	0	0	0	0	0	0	0	0	0	0	0	0	0	0	0	0	0	0	0	0
18	2018-08-13	1899-12-31 12:00:00	40	0	0	1	0	0	0	0	0	0	0	0	0	0	0	0	0	0	0	0	0	0	0	0	0	0	0	0	0	0	0	0	0	0	0	0	0	0	0	0	0	0	0	0	0	0	0
19	2018-08-15	1899-12-31 12:00:00	42	0	0	0	0	0	0	0	0	0	0	0	0	0	0	0	0	0	0	0	0	0	0	0	0	0	0	0	0	0	0	0	0	0	0	0	0	0	0	0	0	0	0	0	0	0	0
20	2018-08-17	1899-12-31 12:00:00	44	0	0	0	0	0	0	0	0	0	0	0	0	0	0	0	0	0	0	0	0	0	0	0	0	0	0	0	0	0	0	0	0	0	0	0	0	0	0	0	0	0	0	0	0	0	0
21	2018-08-20	1899-12-31 12:00:00	47	0	0	0	0	0	0	0	0	0	0	0	0	0	0	0	0	0	0	0	0	0	0	0	0	0	0	0	0	0	0	0	0	0	0	0	0	0	0	0	0	0	0	0	0	0	0
22	2018-08-22	1899-12-31 12:00:00	49	0	0	0	0	0	0	0	0	0	0	0	0	0	0	0	0	0	0	0	0	0	0	0	0	0	0	0	0	0	0	0	0	0	0	0	0	0	0	0	0	0	0	0	0	0	0
23	2018-08-24	1899-12-31 12:00:00	51	0	0	0	0	0	0	0	0	0	0	0	0	0	0	0	0	0	0	0	0	0	0	0	0	0	0	0	0	0	0	0	0	0	0	0	0	0	0	0	0	0	0	0	0	0	0
24	2018-08-27	1899-12-31 12:00:00	54	0	0	0	0	0	0	0	0	0	0	0	0	0	0	0	0	0	0	0	0	0	0	0	0	0	0	0	0	0	0	0	0	0	0	0	0	0	0	0	0	0	0	0	0	0	0
25	2018-08-29	1899-12-31 12:00:00	56	0	0	0	0	0	0	0	0	0	0	0	0	0	0	0	0	0	0	0	0	0	0	0	0	0	0	0	0	0	0	0	0	0	0	0	0	0	0	0	0	0	0	0	0	0	0
26	2018-09-01	1899-12-31 12:00:00	59	0	0	0	0	0	0	0	0	0	0	0	0	0	0	0	0	0	0	0	0	0	0	0	0	0	0	0	0	0	0	0	0	0	0	0	0	0	0	0	0	0	0	0	0	0	0
27	2018-09-03	1899-12-31 12:00:00	61	0	0	0	0	0	0	0	0	0	0	0	0	0	0	0	0	0	0	0	0	0	0	0	0	0	0	0	0	0	0	0	0	0	0	0	0	0	0	0	0	0	0	0	0	0	0
28	2018-09-05	1899-12-31 12:00:00	63	0	0	0	0	0	0	0	0	0	0	0	0	0	0	0	0	0	0	0	0	0	0	0	0	0	0	0	0	0	0	0	0	0	0	0	0	0	0	0	0	0	0	0	0	0	0
29	2018-09-07	1899-12-31 12:00:00	65	0	0	0	0	0	0	0	0	0	0	0	0	0	0	0	0	0	0	0	0	0	0	0	0	0	0	0	0	0	0	0	0	0	0	0	0	0	0	0	0	0	0	0	0	0	0
30	2018-09-10	1899-12-31 12:00:00	68	0	0	0	0	0	0	0	0	0	0	0	0	0	0	0	0	0	0	0	0	0	0	0	0	0	0	0	0	0	0	0	0	0	0	0	0	0	0	0	0	0	0	0	0	0	0
31	2018-09-12	1899-12-31 12:00:00	70	0	0	0	0	0	0	0	0	0	0	0	0	0	0	0	0	0	0	0	0	0	0	0	0	0	0	0	0	0	0	0	0	0	0	0	0	0	0	0	0	0	0	0	0	0	0
32	2018-09-14	1899-12-31 12:00:00	72	0	0	0	0	0	0	0	0	0	0	0	0	0	0	0	0	0	0	0	0	0	0	0	0	0	0	0	0	0	0	0	0	0	0	0	0	0	0	0	0	0	0	0	0	0	0
33	2018-09-17	1899-12-31 12:00:00	75	0	0	0	0	0	0	0	0	0	0	0	0	0	0	0	0	0	0	0	0	0	0	0	0	0	0	0	0	0	0	0	0	0	0	0	0	0	0	0	0	0	0	0	0	0	0
34	2018-09-19	1899-12-31 12:00:00	77	0	0	0	0	0	0	0	0	0	0	0	0	0	0	0	0	0	0	0	0	0	0	0	0	0	0	0	0	0	0	0	0	0	0	0	0	0	0	0	0	0	0	0	0	0	0
35	2018-09-21	1899-12-31 12:00:00	79	0	0	0	0	0	0	0	0	0	0	0	0	0	0	0	0	0	0	0	0	0	0	0	0	0	0	0	0	0	0	0	0	0	0	0	0	0	0	0	0	0	0	0	0	0	0
36	2000-01-01	1899-12-31 12:00:00	79	0	0	0	0	0	0	0	0	0	0	0	0	0	0	0	0	0	0	0	0	0	0	0	0	0	0	0	0	0	0	0	0	0	0	0	0	0	0	0	0	0	0	0	0	0	0
37	2000-01-01	1899-12-31 12:00:00	79	0	0	0	0	0	0	0	0	0	0	0	0	0	0	0	0	0	0	0	0	0	0	0	0	0	0	0	0	0	0	0	0	0	0	0	0	0	0	0	0	0	0	0	0	0	0
38	2000-01-01	1899-12-31 12:00:00	79	0	0	0	0	0	0	0	0	0	0	0	0	0	0	0	0	0	0	0	0	0	0	0	0	0	0	0	0	0	0	0	0	0	0	0	0	0	0	0	0	0	0	0	0	0	0
39	2000-01-01	1899-12-31 12:00:00	79	0	0	0	0	0	0	0	0	0	0	0	0	0	0	0	0	0	0	0	0	0	0	0	0	0	0	0	0	0	0	0	0	0	0	0	0	0	0	0	0	0	0	0	0	0	0
40	2000-01-01	1899-12-31 12:00:00	79	0	0	0	0	0	0	0	0	0	0	0	0	0	0	0	0	0	0	0	0	0	0	0	0	0	0	0	0	0	0	0	0	0	0	0	0	0	0	0	0	0	0	0	0	0	0
41	2000-01-01	1899-12-31 12:00:00	79	0	0	0	0	0	0	0	0	0	0	0	0	0	0	0	0	0	0	0	0	0	0	0	0	0	0	0	0	0	0	0	0	0	0	0	0	0	0	0	0	0	0	0	0	0	0
42	2000-01-01	1899-12-31 12:00:00	79	0	0	0	0	0	0	0	0	0	0	0	0	0	0	0	0	0	0	0	0	0	0	0	0	0	0	0	0	0	0	0	0	0	0	0	0	0	0	0	0	0	0	0	0	0	0
43	2000-01-01	1899-12-31 12:00:00	79	0	0	0	0	0	0	0	0	0	0	0	0	0	0	0	0	0	0	0	0	0	0	0	0	0	0	0	0	0	0	0	0	0	0	0	0	0	0	0	0	0	0	0	0	0	0
44	2000-01-01	1899-12-31 12:00:00	79	0	0	0	0	0	0	0	0	0	0	0	0	0	0	0	0	0	0	0	0	0	0	0	0	0	0	0	0	0	0	0	0	0	0	0	0	0	0	0	0	0	0	0	0	0	0
45	2000-01-01	1899-12-31 12:00:00	79	0	0	0	0	0	0	0	0	0	0	0	0	0	0	0	0	0	0	0	0	0	0	0	0	0	0	0	0	0	0	0	0	0	0	0	0	0	0	0	0	0	0	0	0	0	0
46	2000-01-01	1899-12-31 12:00:00	79	0	0	0	0	0	0	0	0	0	0	0	0	0	0	0	0	0	0	0	0	0	0	0	0	0	0	0	0	0	0	0	0	0	0	0	0	0	0	0	0	0	0	0	0	0	0
47	2000-01-01	1899-12-31 12:00:00	79	0	0	0	0	0	0	0	0	0	0	0	0	0	0	0	0	0	0	0	0	0	0	0	0	0	0	0	0	0	0	0	0	0	0	0	0	0	0	0	0	0	0	0	0	0	0
48	2000-01-01	1899-12-31 12:00:00	79	0	0	0	0	0	0	0	0	0	0	0	0	0	0	0	0	0	0	0	0	0	0	0	0	0	0	0	0	0	0	0	0	0	0	0	0	0	0	0	0	0	0	0	0	0	0
49	2000-01-01	1899-12-31 12:00:00	79	0	0	0	0	0	0	0	0	0	0	0	0	0	0	0	0	0	0	0	0	0	0	0	0	0	0	0	0	0	0	0	0	0	0	0	0	0	0	0	0	0	0	0	0	0	0
50	2000-01-01	1899-12-31 12:00:00	79	0	0	0	0	0	0	0	0	0	0	0	0	0	0	0	0	0	0	0	0	0	0	0	0	0	0	0	0	0	0	0	0	0	0	0	0	0	0	0	0	0	0	0	0	0	0
51	2000-01-01	1899-12-31 12:00:00	79	0	0	0	0	0	0	0	0	0	0	0	0	0	0	0	0	0	0	0	0	0	0	0	0	0	0	0	0	0	0	0	0	0	0	0	0	0	0	0	0	0	0	0	0	0	0
52	2000-01-01	1899-12-31 12:00:00	79	0	0	0	0	0	0	0	0	0	0	0	0	0	0	0	0	0	0	0	0	0	0	0	0	0	0	0	0	0	0	0	0	0	0	0	0	0	0	0	0	0	0	0	0	0	0
53	2000-01-01	1899-12-31 12:00:00	79	0	0	0	0	0	0	0	0	0	0	0	0	0	0	0	0	0	0	0	0	0	0	0	0	0	0	0	0	0	0	0	0	0	0	0	0	0	0	0	0	0	0	0	0	0	0
54	2000-01-01	1899-12-31 12:00:00	79	0	0	0	0	0	0	0	0	0	0	0	0	0	0	0	0	0	0	0	0	0	0	0	0	0	0	0	0	0	0	0	0	0	0	0	0	0	0	0	0	0	0	0	0	0	0
55	2000-01-01	1899-12-31 12:00:00	79	0	0	0	0	0	0	0	0	0	0	0	0	0	0	0	0	0	0	0	0	0	0	0	0	0	0	0	0	0	0	0	0	0	0	0	0	0	0	0	0	0	0	0	0	0	0
56	2000-01-01	1899-12-31 12:00:00	79	0	0	0	0	0	0	0	0	0	0	0	0	0	0	0	0	0	0	0	0	0	0	0	0	0	0	0	0	0	0	0	0	0	0	0	0	0	0	0	0	0	0	0	0	0	0
57	2000-01-01	1899-12-31 12:00:00	79	0	0	0	0	0	0	0	0	0	0	0	0	0	0	0	0	0	0	0	0	0	0	0	0	0	0	0	0	0	0	0	0	0	0	0	0	0	0	0	0	0	0	0	0	0	0
58	2000-01-01	1899-12-31 12:00:00	79	0	0	0	0	0	0	0	0	0	0	0	0	0	0	0	0	0	0	0	0	0	0	0	0	0	0	0	0	0	0	0	0	0	0	0	0	0	0	0	0	0	0	0	0	0	0
59	2000-01-01	1899-12-31 12:00:00	79	0	0	0	0	0	0	0	0	0	0	0	0	0	0	0	0	0	0	0	0	0	0	0	0	0	0	0	0	0	0	0	0	0	0	0	0	0	0	0	0	0	0	0	0	0	0
60	2000-01-01	1899-12-31 12:00:00	79	0	0	0	0	0	0	0	0	0	0	0	0	0	0	0	0	0	0	0	0	0	0	0	0	0	0	0	0	0	0	0	0	0	0	0	0	0	0	0	0	0	0	0	0	0	0
61	2000-01-01	1899-12-31 12:00:00	79	0	0	0	0	0	0	0	0	0	0	0	0	0	0	0	0	0	0	0	0	0	0	0	0	0	0	0	0	0	0	0	0	0	0	0	0	0	0	0	0	0	0	0	0	0	0
62	2000-01-01	1899-12-31 12:00:00	79	0	0	0	0	0	0	0	0	0	0	0	0	0	0	0	0	0	0	0	0	0	0	0	0	0	0	0	0	0	0	0	0	0	0	0	0	0	0	0	0	0	0	0	0	0	0
63	2000-01-01	1899-12-31 12:00:00	79	0	0	0	0	0	0	0	0	0	0	0	0	0	0	0	0	0	0	0	0	0	0	0	0	0	0	0	0	0	0	0	0	0	0	0	0	0	0	0	0	0	0	0	0	0	0
64	2000-01-01	1899-12-31 12:00:00	79	0	0	0	0	0	0	0	0	0	0	0	0	0	0	0	0	0	0	0	0	0	0	0	0	0	0	0	0	0	0	0	0	0	0	0	0	0	0	0	0	0	0	0	0	0	0
65	2000-01-01	1899-12-31 12:00:00	79	0	0	0	0	0	0	0	0	0	0	0	0	0	0	0	0	0	0	0	0	0	0	0	0	0	0	0	0	0	0	0	0	0	0	0	0	0	0	0	0	0	0	0	0	0	0
66	2000-01-01	1899-12-31 12:00:00	79	0	0	0	0	0	0	0	0	0	0	0	0	0	0	0	0	0	0	0	0	0	0	0	0	0	0	0	0	0	0	0	0	0	0	0	0	0	0	0	0	0	0	0	0	0	0
67	2000-01-01	1899-12-31 12:00:00	79	0	0	0	0	0	0	0	0	0	0	0	0	0	0	0	0	0	0	0	0	0	0	0	0	0	0	0	0	0	0	0	0	0	0	0	0	0	0	0	0	0	0	0	0	0	0
68	2000-01-01	1899-12-31 12:00:00	79	0	0	0	0	0	0	0	0	0	0	0	0	0	0	0	0	0	0	0	0	0	0	0	0	0	0	0	0	0	0	0	0	0	0	0	0	0	0	0	0	0	0	0	0	0	0
69	2000-01-01	1899-12-31 12:00:00	79	0	0	0	0	0	0	0	0	0	0	0	0	0	0	0	0	0	0	0	0	0	0	0	0	0	0	0	0	0	0	0	0	0	0	0	0	0	0	0	0	0	0	0	0	0	0
70	2000-01-01	1899-12-31 12:00:00	79	0	0	0	0	0	0	0	0	0	0	0	0	0	0	0	0	0	0	0	0	0	0	0	0	0	0	0	0	0	0	0	0	0	0	0	0	0	0	0	0	0	0	0	0	0	0
71	2000-01-01	1899-12-31 12:00:00	79	0	0	0	0	0	0	0	0	0	0	0	0	0	0	0	0	0	0	0	0	0	0	0	0	0	0	0	0	0	0	0	0	0	0	0	0	0	0	0	0	0	0	0	0	0	0
72	2000-01-01	1899-12-31 12:00:00	79	0	0	0	0	0	0	0	0	0	0	0	0	0	0	0	0	0	0	0	0	0	0	0	0	0	0	0	0	0	0	0	0	0	0	0	0	0	0	0	0	0	0	0	0	0	0
73	2000-01-01	1899-12-31 12:00:00	79	0	0	0	0	0	0	0	0	0	0	0	0	0	0	0	0	0	0	0	0	0	0	0	0	0	0	0	0	0	0	0	0	0	0	0	0	0	0	0	0	0	0	0	0	0	0
74	2000-01-01	1899-12-31 12:00:00	79	0	0	0	0	0	0	0	0	0	0	0	0	0	0	0	0	0	0	0	0	0	0	0	0	0	0	0	0	0	0	0	0	0	0	0	0	0	0	0	0	0	0	0	0	0	0
75	2000-01-01	1899-12-31 12:00:00	79	0	0	0	0	0	0	0	0	0	0	0	0	0	0	0	0	0	0	0	0	0	0	0	0	0	0	0	0	0	0	0	0	0	0	0	0	0	0	0	0	0	0	0	0	0	0
				1	1	4	2	0	0	0	0	0	0	0	0	0	0	0	0	0	0	0	0	0	0	1	1	0	0	0	0	0	0	0	0	0	0	0	0	0	0	0	0	0	0	0	7	0	0
[truncated: 154 more columns]

## Sheet: Nx per bottle
			deaths
				bottle number
	date	time	day	1	2	3	4	5	6	7	8	9	10	11	12	13	14	15	16	17	18	19	20	21	22	23	24	25	26	27	28	29	30	31	32	33	34	35	36	37	38	39	40	41	42	43	44	45	46
0	2018-07-04	1899-12-31 12:00:00	0	15	15	15	15	15	15	15	15	15	15	15	15	15	15	15	15	15	15	15	15	15	15	15	15	15	15	15	15	15	15	15	15	15	15	15	15	15	15	15	15	15	15	15	15	15	15
1	2018-07-04	1899-12-31 12:00:00	0	15	15	15	15	15	15	15	15	15	15	15	15	15	15	15	15	15	15	15	15	15	15	15	15	15	15	15	15	15	15	15	15	15	15	15	15	15	15	15	15	15	15	15	15	15	15
2	2018-07-06	1899-12-31 12:00:00	2	14	15	15	13	15	15	15	15	15	15	15	15	15	15	15	15	15	15	15	15	15	15	15	14	15	15	15	15	15	15	15	15	15	15	15	15	15	15	15	15	15	15	15	15	15	15
3	2018-07-09	1899-12-31 12:00:00	5	14	15	15	13	15	15	15	15	15	15	15	15	15	15	15	15	15	15	15	15	15	15	15	14	15	15	15	15	15	15	15	15	15	15	15	15	15	15	15	15	15	15	15	15	14	15
4	2018-07-11	1899-12-31 12:00:00	7	14	15	15	13	15	15	15	15	15	15	15	15	15	15	15	15	15	15	15	15	15	15	15	14	15	15	15	15	15	15	15	15	15	15	15	15	15	15	15	15	15	15	15	15	14	15
5	2018-07-13	1899-12-31 12:00:00	9	14	15	15	13	14	15	15	15	15	15	15	15	15	15	15	15	15	15	15	15	14	15	14	14	15	15	15	15	15	15	15	15	15	15	15	15	15	15	15	15	12	13	12	15	13	11
6	2018-07-16	1899-12-31 12:00:00	12	14	15	15	13	14	15	15	15	15	15	15	15	15	15	15	15	15	15	15	15	14	15	14	14	15	15	15	15	15	15	15	15	15	15	15	15	15	15	15	15	9	12	10	11	10	11
7	2018-07-18	1899-12-31 12:00:00	14	14	15	15	13	14	15	15	15	15	15	15	15	15	15	15	15	15	15	15	15	14	15	14	14	15	15	15	15	15	15	15	15	15	15	15	15	15	15	15	15	8	10	10	10	10	11
8	2018-07-20	1899-12-31 12:00:00	16	13	14	15	13	14	15	15	15	15	15	15	15	15	15	15	15	15	15	15	15	14	15	14	14	15	15	15	15	15	15	15	15	15	15	15	15	15	15	15	15	8	10	10	10	9	11
9	2018-07-23	1899-12-31 12:00:00	19	13	14	15	13	14	15	15	15	15	15	15	15	15	15	15	15	15	15	15	15	14	15	14	14	15	15	15	15	15	15	15	15	15	15	15	15	15	15	15	15	7	8	7	8	9	11
10	2018-07-25	1899-12-31 12:00:00	21	13	14	14	13	14	15	15	15	15	15	15	15	15	15	15	15	15	15	15	15	14	15	14	14	15	15	15	15	15	15	15	15	15	15	15	15	15	15	15	15	7	8	6	6	8	11
11	2018-07-27	1899-12-31 12:00:00	23	13	14	14	13	14	15	15	15	15	15	15	15	15	15	15	15	15	15	15	15	14	15	14	14	15	15	15	15	15	15	15	15	15	15	15	15	15	15	15	15	6	5	6	6	5	11
12	2018-07-30	1899-12-31 12:00:00	26	13	14	14	13	14	15	15	15	15	15	15	15	15	15	15	15	15	15	15	15	14	15	14	14	15	15	15	15	15	15	15	15	15	15	15	15	15	15	15	15	4	5	4	5	4	11
13	2018-08-01	1899-12-31 12:00:00	28	13	14	13	13	14	15	15	15	15	15	15	15	15	15	15	15	15	15	15	15	14	15	13	14	15	15	15	15	15	15	15	15	15	15	15	15	15	15	15	15	4	4	4	5	0	11
14	2018-08-03	1899-12-31 12:00:00	30	13	14	13	13	14	15	15	15	15	15	15	15	15	15	15	15	15	15	15	15	14	15	13	14	15	15	15	15	15	15	15	15	15	15	15	15	15	15	15	15	3	4	3	5	-4	11
15	2018-08-06	1899-12-31 12:00:00	33	13	14	12	13	14	15	15	15	15	15	15	15	15	15	15	15	15	15	15	15	14	15	13	13	15	15	15	15	15	15	15	15	15	15	15	15	15	15	15	15	3	3	3	-2	-6	11
16	2018-08-08	1899-12-31 12:00:00	35	13	14	12	13	14	15	15	15	15	15	15	15	15	15	15	15	15	15	15	15	14	15	13	13	15	15	15	15	15	15	15	15	15	15	15	15	15	15	15	15	3	3	3	-2	-6	11
17	2018-08-10	1899-12-31 12:00:00	37	13	14	12	13	14	15	15	15	15	15	15	15	15	15	15	15	15	15	15	15	14	15	13	13	15	15	15	15	15	15	15	15	15	15	15	15	15	15	15	15	3	3	3	-2	-6	11
18	2018-08-13	1899-12-31 12:00:00	40	13	14	11	13	14	15	15	15	15	15	15	15	15	15	15	15	15	15	15	15	14	15	13	13	15	15	15	15	15	15	15	15	15	15	15	15	15	15	15	15	3	3	3	-2	-6	11
19	2018-08-15	1899-12-31 12:00:00	42	13	14	11	13	14	15	15	15	15	15	15	15	15	15	15	15	15	15	15	15	13	15	13	13	14	15	15	15	15	15	15	15	15	15	15	15	15	15	15	15	3	3	3	-2	-6	11
20	2018-08-17	1899-12-31 12:00:00	44	13	14	11	13	13	15	15	15	15	15	15	15	15	15	15	15	15	15	15	15	13	15	13	13	14	15	15	15	15	15	15	15	15	15	15	15	15	15	15	15	3	3	3	-2	-6	11
21	2018-08-20	1899-12-31 12:00:00	47	13	12	10	10	13	15	15	15	15	15	15	15	15	15	15	15	15	15	15	15	10	15	11	11	14	15	15	15	15	15	15	15	15	15	15	15	15	15	15	15	3	3	3	-2	-6	11
22	2018-08-22	1899-12-31 12:00:00	49	13	12	9	9	13	15	15	15	15	15	15	15	15	15	15	15	15	15	15	15	8	15	10	10	11	15	15	15	15	15	15	15	15	15	15	15	15	15	15	15	3	3	3	-2	-6	11
23	2018-08-24	1899-12-31 12:00:00	51	13	12	5	9	11	15	15	15	15	15	15	15	15	15	15	15	15	15	15	15	8	15	10	10	11	15	15	15	15	15	15	15	15	15	15	15	15	15	15	15	3	3	3	-2	-6	11
24	2018-08-27	1899-12-31 12:00:00	54	12	10	5	9	10	15	15	15	15	15	15	15	15	15	15	15	15	15	15	15	5	12	8	9	9	15	15	15	15	15	15	15	15	15	15	15	15	15	15	15	3	3	3	-2	-6	11
25	2018-08-29	1899-12-31 12:00:00	56	11	9	5	9	8	15	15	15	15	15	15	15	15	15	15	15	15	15	15	15	3	11	7	9	8	15	15	15	15	15	15	15	15	15	15	15	15	15	15	15	3	3	3	-2	-6	11
26	2018-09-01	1899-12-31 12:00:00	59	10	9	5	6	8	15	15	15	15	15	15	15	15	15	15	15	15	15	15	15	2	11	6	9	6	15	15	15	15	15	15	15	15	15	15	15	15	15	15	15	3	3	3	-2	-6	11
27	2018-09-03	1899-12-31 12:00:00	61	10	8	4	3	6	15	15	15	15	15	15	15	15	15	15	15	15	15	15	15	1	3	3	6	4	15	15	15	15	15	15	15	15	15	15	15	15	15	15	15	3	3	3	-2	-6	11
28	2018-09-05	1899-12-31 12:00:00	63	10	8	4	3	6	15	15	15	15	15	15	15	15	15	15	15	15	15	15	15	-1	2	3	5	4	15	15	15	15	15	15	15	15	15	15	15	15	15	15	15	3	3	3	-2	-6	11
29	2018-09-07	1899-12-31 12:00:00	65	7	6	4	1	3	15	15	15	15	15	15	15	15	15	15	15	15	15	15	15	-1	2	3	4	4	15	15	15	15	15	15	15	15	15	15	15	15	15	15	15	3	3	3	-2	-6	11
30	2018-09-10	1899-12-31 12:00:00	68	4	6	3	0	3	15	15	15	15	15	15	15	15	15	15	15	15	15	15	15	-2	2	2	2	3	15	15	15	15	15	15	15	15	15	15	15	15	15	15	15	3	3	3	-2	-6	11
31	2018-09-12	1899-12-31 12:00:00	70	1	6	3	0	1	15	15	15	15	15	15	15	15	15	15	15	15	15	15	15	-2	1	1	2	3	15	15	15	15	15	15	15	15	15	15	15	15	15	15	15	3	3	3	-2	-6	11
32	2018-09-14	1899-12-31 12:00:00	72	0	4	3	0	1	15	15	15	15	15	15	15	15	15	15	15	15	15	15	15	-2	1	1	1	3	15	15	15	15	15	15	15	15	15	15	15	15	15	15	15	3	3	3	-2	-6	11
33	2018-09-17	1899-12-31 12:00:00	75	0	4	3	0	1	15	15	15	15	15	15	15	15	15	15	15	15	15	15	15	-2	1	1	1	2	15	15	15	15	15	15	15	15	15	15	15	15	15	15	15	3	3	3	-2	-6	11
34	2018-09-19	1899-12-31 12:00:00	77	0	2	3	0	0	15	15	15	15	15	15	15	15	15	15	15	15	15	15	15	-2	1	1	1	2	15	15	15	15	15	15	15	15	15	15	15	15	15	15	15	3	3	3	-2	-6	11
35	2018-09-21	1899-12-31 12:00:00	79	0	1	3	0	0	15	15	15	15	15	15	15	15	15	15	15	15	15	15	15	-2	1	1	1	2	15	15	15	15	15	15	15	15	15	15	15	15	15	15	15	3	3	3	-2	-6	11
36	2000-01-01	1899-12-31 12:00:00	79	0	1	3	0	0	15	15	15	15	15	15	15	15	15	15	15	15	15	15	15	-2	1	1	1	2	15	15	15	15	15	15	15	15	15	15	15	15	15	15	15	3	3	3	-2	-6	11
37	2000-01-01	1899-12-31 12:00:00	79	0	1	3	0	0	15	15	15	15	15	15	15	15	15	15	15	15	15	15	15	-2	1	1	1	2	15	15	15	15	15	15	15	15	15	15	15	15	15	15	15	3	3	3	-2	-6	11
38	2000-01-01	1899-12-31 12:00:00	79	0	1	3	0	0	15	15	15	15	15	15	15	15	15	15	15	15	15	15	15	-2	1	1	1	2	15	15	15	15	15	15	15	15	15	15	15	15	15	15	15	3	3	3	-2	-6	11
39	2000-01-01	1899-12-31 12:00:00	79	0	1	3	0	0	15	15	15	15	15	15	15	15	15	15	15	15	15	15	15	-2	1	1	1	2	15	15	15	15	15	15	15	15	15	15	15	15	15	15	15	3	3	3	-2	-6	11
40	2000-01-01	1899-12-31 12:00:00	79	0	1	3	0	0	15	15	15	15	15	15	15	15	15	15	15	15	15	15	15	-2	1	1	1	2	15	15	15	15	15	15	15	15	15	15	15	15	15	15	15	3	3	3	-2	-6	11
41	2000-01-01	1899-12-31 12:00:00	79	0	1	3	0	0	15	15	15	15	15	15	15	15	15	15	15	15	15	15	15	-2	1	1	1	2	15	15	15	15	15	15	15	15	15	15	15	15	15	15	15	3	3	3	-2	-6	11
42	2000-01-01	1899-12-31 12:00:00	79	0	1	3	0	0	15	15	15	15	15	15	15	15	15	15	15	15	15	15	15	-2	1	1	1	2	15	15	15	15	15	15	15	15	15	15	15	15	15	15	15	3	3	3	-2	-6	11
43	2000-01-01	1899-12-31 12:00:00	79	0	1	3	0	0	15	15	15	15	15	15	15	15	15	15	15	15	15	15	15	-2	1	1	1	2	15	15	15	15	15	15	15	15	15	15	15	15	15	15	15	3	3	3	-2	-6	11
44	2000-01-01	1899-12-31 12:00:00	79	0	1	3	0	0	15	15	15	15	15	15	15	15	15	15	15	15	15	15	15	-2	1	1	1	2	15	15	15	15	15	15	15	15	15	15	15	15	15	15	15	3	3	3	-2	-6	11
45	2000-01-01	1899-12-31 12:00:00	79	0	1	3	0	0	15	15	15	15	15	15	15	15	15	15	15	15	15	15	15	-2	1	1	1	2	15	15	15	15	15	15	15	15	15	15	15	15	15	15	15	3	3	3	-2	-6	11
46	2000-01-01	1899-12-31 12:00:00	79	0	1	3	0	0	15	15	15	15	15	15	15	15	15	15	15	15	15	15	15	-2	1	1	1	2	15	15	15	15	15	15	15	15	15	15	15	15	15	15	15	3	3	3	-2	-6	11
47	2000-01-01	1899-12-31 12:00:00	79	0	1	3	0	0	15	15	15	15	15	15	15	15	15	15	15	15	15	15	15	-2	1	1	1	2	15	15	15	15	15	15	15	15	15	15	15	15	15	15	15	3	3	3	-2	-6	11
48	2000-01-01	1899-12-31 12:00:00	79	0	1	3	0	0	15	15	15	15	15	15	15	15	15	15	15	15	15	15	15	-2	1	1	1	2	15	15	15	15	15	15	15	15	15	15	15	15	15	15	15	3	3	3	-2	-6	11
49	2000-01-01	1899-12-31 12:00:00	79	0	1	3	0	0	15	15	15	15	15	15	15	15	15	15	15	15	15	15	15	-2	1	1	1	2	15	15	15	15	15	15	15	15	15	15	15	15	15	15	15	3	3	3	-2	-6	11
50	2000-01-01	1899-12-31 12:00:00	79	0	1	3	0	0	15	15	15	15	15	15	15	15	15	15	15	15	15	15	15	-2	1	1	1	2	15	15	15	15	15	15	15	15	15	15	15	15	15	15	15	3	3	3	-2	-6	11
51	2000-01-01	1899-12-31 12:00:00	79	0	1	3	0	0	15	15	15	15	15	15	15	15	15	15	15	15	15	15	15	-2	1	1	1	2	15	15	15	15	15	15	15	15	15	15	15	15	15	15	15	3	3	3	-2	-6	11
52	2000-01-01	1899-12-31 12:00:00	79	0	1	3	0	0	15	15	15	15	15	15	15	15	15	15	15	15	15	15	15	-2	1	1	1	2	15	15	15	15	15	15	15	15	15	15	15	15	15	15	15	3	3	3	-2	-6	11
53	2000-01-01	1899-12-31 12:00:00	79	0	1	3	0	0	15	15	15	15	15	15	15	15	15	15	15	15	15	15	15	-2	1	1	1	2	15	15	15	15	15	15	15	15	15	15	15	15	15	15	15	3	3	3	-2	-6	11
54	2000-01-01	1899-12-31 12:00:00	79	0	1	3	0	0	15	15	15	15	15	15	15	15	15	15	15	15	15	15	15	-2	1	1	1	2	15	15	15	15	15	15	15	15	15	15	15	15	15	15	15	3	3	3	-2	-6	11
55	2000-01-01	1899-12-31 12:00:00	79	0	1	3	0	0	15	15	15	15	15	15	15	15	15	15	15	15	15	15	15	-2	1	1	1	2	15	15	15	15	15	15	15	15	15	15	15	15	15	15	15	3	3	3	-2	-6	11
56	2000-01-01	1899-12-31 12:00:00	79	0	1	3	0	0	15	15	15	15	15	15	15	15	15	15	15	15	15	15	15	-2	1	1	1	2	15	15	15	15	15	15	15	15	15	15	15	15	15	15	15	3	3	3	-2	-6	11
57	2000-01-01	1899-12-31 12:00:00	79	0	1	3	0	0	15	15	15	15	15	15	15	15	15	15	15	15	15	15	15	-2	1	1	1	2	15	15	15	15	15	15	15	15	15	15	15	15	15	15	15	3	3	3	-2	-6	11
58	2000-01-01	1899-12-31 12:00:00	79	0	1	3	0	0	15	15	15	15	15	15	15	15	15	15	15	15	15	15	15	-2	1	1	1	2	15	15	15	15	15	15	15	15	15	15	15	15	15	15	15	3	3	3	-2	-6	11
59	2000-01-01	1899-12-31 12:00:00	79	0	1	3	0	0	15	15	15	15	15	15	15	15	15	15	15	15	15	15	15	-2	1	1	1	2	15	15	15	15	15	15	15	15	15	15	15	15	15	15	15	3	3	3	-2	-6	11
60	2000-01-01	1899-12-31 12:00:00	79	0	1	3	0	0	15	15	15	15	15	15	15	15	15	15	15	15	15	15	15	-2	1	1	1	2	15	15	15	15	15	15	15	15	15	15	15	15	15	15	15	3	3	3	-2	-6	11
61	2000-01-01	1899-12-31 12:00:00	79	0	1	3	0	0	15	15	15	15	15	15	15	15	15	15	15	15	15	15	15	-2	1	1	1	2	15	15	15	15	15	15	15	15	15	15	15	15	15	15	15	3	3	3	-2	-6	11
62	2000-01-01	1899-12-31 12:00:00	79	0	1	3	0	0	15	15	15	15	15	15	15	15	15	15	15	15	15	15	15	-2	1	1	1	2	15	15	15	15	15	15	15	15	15	15	15	15	15	15	15	3	3	3	-2	-6	11
63	2000-01-01	1899-12-31 12:00:00	79	0	1	3	0	0	15	15	15	15	15	15	15	15	15	15	15	15	15	15	15	-2	1	1	1	2	15	15	15	15	15	15	15	15	15	15	15	15	15	15	15	3	3	3	-2	-6	11
64	2000-01-01	1899-12-31 12:00:00	79	0	1	3	0	0	15	15	15	15	15	15	15	15	15	15	15	15	15	15	15	-2	1	1	1	2	15	15	15	15	15	15	15	15	15	15	15	15	15	15	15	3	3	3	-2	-6	11
65	2000-01-01	1899-12-31 12:00:00	79	0	1	3	0	0	15	15	15	15	15	15	15	15	15	15	15	15	15	15	15	-2	1	1	1	2	15	15	15	15	15	15	15	15	15	15	15	15	15	15	15	3	3	3	-2	-6	11
66	2000-01-01	1899-12-31 12:00:00	79	0	1	3	0	0	15	15	15	15	15	15	15	15	15	15	15	15	15	15	15	-2	1	1	1	2	15	15	15	15	15	15	15	15	15	15	15	15	15	15	15	3	3	3	-2	-6	11
67	2000-01-01	1899-12-31 12:00:00	79	0	1	3	0	0	15	15	15	15	15	15	15	15	15	15	15	15	15	15	15	-2	1	1	1	2	15	15	15	15	15	15	15	15	15	15	15	15	15	15	15	3	3	3	-2	-6	11
68	2000-01-01	1899-12-31 12:00:00	79	0	1	3	0	0	15	15	15	15	15	15	15	15	15	15	15	15	15	15	15	-2	1	1	1	2	15	15	15	15	15	15	15	15	15	15	15	15	15	15	15	3	3	3	-2	-6	11
69	2000-01-01	1899-12-31 12:00:00	79	0	1	3	0	0	15	15	15	15	15	15	15	15	15	15	15	15	15	15	15	-2	1	1	1	2	15	15	15	15	15	15	15	15	15	15	15	15	15	15	15	3	3	3	-2	-6	11
70	2000-01-01	1899-12-31 12:00:00	79	0	1	3	0	0	15	15	15	15	15	15	15	15	15	15	15	15	15	15	15	-2	1	1	1	2	15	15	15	15	15	15	15	15	15	15	15	15	15	15	15	3	3	3	-2	-6	11
71	2000-01-01	1899-12-31 12:00:00	79	0	1	3	0	0	15	15	15	15	15	15	15	15	15	15	15	15	15	15	15	-2	1	1	1	2	15	15	15	15	15	15	15	15	15	15	15	15	15	15	15	3	3	3	-2	-6	11
72	2000-01-01	1899-12-31 12:00:00	79	0	1	3	0	0	15	15	15	15	15	15	15	15	15	15	15	15	15	15	15	-2	1	1	1	2	15	15	15	15	15	15	15	15	15	15	15	15	15	15	15	3	3	3	-2	-6	11
73	2000-01-01	1899-12-31 12:00:00	79	0	1	3	0	0	15	15	15	15	15	15	15	15	15	15	15	15	15	15	15	-2	1	1	1	2	15	15	15	15	15	15	15	15	15	15	15	15	15	15	15	3	3	3	-2	-6	11
74	2000-01-01	1899-12-31 12:00:00	79	0	1	3	0	0	15	15	15	15	15	15	15	15	15	15	15	15	15	15	15	-2	1	1	1	2	15	15	15	15	15	15	15	15	15	15	15	15	15	15	15	3	3	3	-2	-6	11
75	2000-01-01	1899-12-31 12:00:00	79	0	1	3	0	0	15	15	15	15	15	15	15	15	15	15	15	15	15	15	15	-2	1	1	1	2	15	15	15	15	15	15	15	15	15	15	15	15	15	15	15	3	3	3	-2	-6	11
				0	1	3	0	0	15	15	15	15	15	15	15	15	15	15	15	15	15	15	15	-2	1	1	1	2	15	15	15	15	15	15	15	15	15	15	15	15	15	15	15	3	3	3	-2	-6	11
[truncated: 154 more columns]

## Sheet: Px per bottle
			deaths
				15	15	15	15	15	15	15	15	15	15	15	15	15	15	15	15	15	15	15	15	15	15	15	15	15	15	15	15	15	15	15	15	15	15	15	15	15	15	15	15	15	15	15	15	15	15
0				15	14	12	15	15	0	0	0	0	0	0	0	0	0	0	0	0	0	0	0	17	14	14	14	13	0	0	0	0	0	0	0	0	0	0	0	0	0	0	0	12	12	12	17	21	4
	date	time	day	1	2	3	4	5	6	7	8	9	10	11	12	13	14	15	16	17	18	19	20	21	22	23	24	25	26	27	28	29	30	31	32	33	34	35	36	37	38	39	40	41	42	43	44	45	46
1	2018-07-04	1899-12-31 12:00:00	0	1	1	1	1	1	1	1	1	1	1	1	1	1	1	1	1	1	1	1	1	1	1	1	1	1	1	1	1	1	1	1	1	1	1	1	1	1	1	1	1	1	1	1	1	1	1
2	2018-07-06	1899-12-31 12:00:00	2	1	1	1	1	1	1	1	1	1	1	1	1	1	1	1	1	1	1	1	1	1	1	1	1	1	1	1	1	1	1	1	1	1	1	1	1	1	1	1	1	1	1	1	1	1	1
3	2018-07-09	1899-12-31 12:00:00	5	1	1	1	1	1	1	1	1	1	1	1	1	1	1	1	1	1	1	1	1	1	1	1	1	1	1	1	1	1	1	1	1	1	1	1	1	1	1	1	1	1	1	1	1	0.933333	1
4	2018-07-11	1899-12-31 12:00:00	7	1	1	1	1	1	1	1	1	1	1	1	1	1	1	1	1	1	1	1	1	1	1	1	1	1	1	1	1	1	1	1	1	1	1	1	1	1	1	1	1	1	1	1	1	0.933333	1
5	2018-07-13	1899-12-31 12:00:00	9	1	1	1	1	0.933333	1	1	1	1	1	1	1	1	1	1	1	1	1	1	1	0.933333	1	1	1	1	1	1	1	1	1	1	1	1	1	1	1	1	1	1	1	0.8	0.866667	0.8	1	0.866667	0.733333
6	2018-07-16	1899-12-31 12:00:00	12	1	1	1	1	0.933333	1	1	1	1	1	1	1	1	1	1	1	1	1	1	1	0.933333	1	1	1	1	1	1	1	1	1	1	1	1	1	1	1	1	1	1	1	0.6	0.8	0.666667	0.733333	0.666667	0.733333
7	2018-07-18	1899-12-31 12:00:00	14	1	1	1	1	0.933333	1	1	1	1	1	1	1	1	1	1	1	1	1	1	1	0.933333	1	1	1	1	1	1	1	1	1	1	1	1	1	1	1	1	1	1	1	0.533333	0.666667	0.666667	0.666667	0.666667	0.733333
8	2018-07-20	1899-12-31 12:00:00	16	0.928571	1	1	1	0.933333	1	1	1	1	1	1	1	1	1	1	1	1	1	1	1	0.933333	1	1	1	1	1	1	1	1	1	1	1	1	1	1	1	1	1	1	1	0.533333	0.666667	0.666667	0.666667	0.6	0.733333
9	2018-07-23	1899-12-31 12:00:00	19	0.928571	1	1	1	0.933333	1	1	1	1	1	1	1	1	1	1	1	1	1	1	1	0.933333	1	1	1	1	1	1	1	1	1	1	1	1	1	1	1	1	1	1	1	0.466667	0.533333	0.466667	0.533333	0.6	0.733333
10	2018-07-25	1899-12-31 12:00:00	21	0.928571	1	1	1	0.933333	1	1	1	1	1	1	1	1	1	1	1	1	1	1	1	0.933333	1	1	1	1	1	1	1	1	1	1	1	1	1	1	1	1	1	1	1	0.466667	0.533333	0.4	0.4	0.533333	0.733333
11	2018-07-27	1899-12-31 12:00:00	23	0.928571	1	1	1	0.933333	1	1	1	1	1	1	1	1	1	1	1	1	1	1	1	0.933333	1	1	1	1	1	1	1	1	1	1	1	1	1	1	1	1	1	1	1	0.4	0.333333	0.4	0.4	0.333333	0.733333
12	2018-07-30	1899-12-31 12:00:00	26	0.928571	1	1	1	0.933333	1	1	1	1	1	1	1	1	1	1	1	1	1	1	1	0.933333	1	1	1	1	1	1	1	1	1	1	1	1	1	1	1	1	1	1	1	0.266667	0.333333	0.266667	0.333333	0.266667	0.733333
13	2018-08-01	1899-12-31 12:00:00	28	0.928571	1	1	1	0.933333	1	1	1	1	1	1	1	1	1	1	1	1	1	1	1	0.933333	1	0.928571	1	1	1	1	1	1	1	1	1	1	1	1	1	1	1	1	1	0.266667	0.266667	0.266667	0.333333	0	0.733333
14	2018-08-03	1899-12-31 12:00:00	30	0.928571	1	1	1	0.933333	1	1	1	1	1	1	1	1	1	1	1	1	1	1	1	0.933333	1	0.928571	1	1	1	1	1	1	1	1	1	1	1	1	1	1	1	1	1	0.2	0.266667	0.2	0.333333	#DIV/0!	0.733333
15	2018-08-06	1899-12-31 12:00:00	33	0.928571	1	1	1	0.933333	1	1	1	1	1	1	1	1	1	1	1	1	1	1	1	0.933333	1	0.928571	0.928571	1	1	1	1	1	1	1	1	1	1	1	1	1	1	1	1	0.2	0.2	0.2	0.333333	#DIV/0!	0.733333
16	2018-08-08	1899-12-31 12:00:00	35	0.928571	1	1	1	0.933333	1	1	1	1	1	1	1	1	1	1	1	1	1	1	1	0.933333	1	0.928571	0.928571	1	1	1	1	1	1	1	1	1	1	1	1	1	1	1	1	0.2	0.2	0.2	0.333333	#DIV/0!	0.733333
17	2018-08-10	1899-12-31 12:00:00	37	0.928571	1	1	1	0.933333	1	1	1	1	1	1	1	1	1	1	1	1	1	1	1	0.933333	1	0.928571	0.928571	1	1	1	1	1	1	1	1	1	1	1	1	1	1	1	1	0.2	0.2	0.2	0.333333	#DIV/0!	0.733333
18	2018-08-13	1899-12-31 12:00:00	40	0.928571	1	1	1	0.933333	1	1	1	1	1	1	1	1	1	1	1	1	1	1	1	0.933333	1	0.928571	0.928571	1	1	1	1	1	1	1	1	1	1	1	1	1	1	1	1	0.2	0.2	0.2	0.333333	#DIV/0!	0.733333
19	2018-08-15	1899-12-31 12:00:00	42	0.928571	1	1	1	0.933333	1	1	1	1	1	1	1	1	1	1	1	1	1	1	1	0.866667	1	0.928571	0.928571	0.933333	1	1	1	1	1	1	1	1	1	1	1	1	1	1	1	0.2	0.2	0.2	0.333333	#DIV/0!	0.733333
20	2018-08-17	1899-12-31 12:00:00	44	0.928571	1	1	1	0.866667	1	1	1	1	1	1	1	1	1	1	1	1	1	1	1	0.866667	1	0.928571	0.928571	0.933333	1	1	1	1	1	1	1	1	1	1	1	1	1	1	1	0.2	0.2	0.2	0.333333	#DIV/0!	0.733333
21	2018-08-20	1899-12-31 12:00:00	47	0.928571	0.857143	0.909091	0.769231	0.866667	1	1	1	1	1	1	1	1	1	1	1	1	1	1	1	0.666667	1	0.785714	0.785714	0.933333	1	1	1	1	1	1	1	1	1	1	1	1	1	1	1	0.2	0.2	0.2	0.333333	#DIV/0!	0.733333
22	2018-08-22	1899-12-31 12:00:00	49	0.928571	0.857143	0.818182	0.692308	0.866667	1	1	1	1	1	1	1	1	1	1	1	1	1	1	1	0.533333	1	0.714286	0.714286	0.733333	1	1	1	1	1	1	1	1	1	1	1	1	1	1	1	0.2	0.2	0.2	0.333333	#DIV/0!	0.733333
23	2018-08-24	1899-12-31 12:00:00	51	0.928571	0.857143	0.454545	0.692308	0.733333	1	1	1	1	1	1	1	1	1	1	1	1	1	1	1	0.533333	1	0.714286	0.714286	0.733333	1	1	1	1	1	1	1	1	1	1	1	1	1	1	1	0.2	0.2	0.2	0.333333	#DIV/0!	0.733333
24	2018-08-27	1899-12-31 12:00:00	54	0.857143	0.714286	0.454545	0.692308	0.666667	1	1	1	1	1	1	1	1	1	1	1	1	1	1	1	0.333333	0.8	0.571429	0.642857	0.6	1	1	1	1	1	1	1	1	1	1	1	1	1	1	1	0.2	0.2	0.2	0.333333	#DIV/0!	0.733333
25	2018-08-29	1899-12-31 12:00:00	56	0.785714	0.642857	0.454545	0.692308	0.533333	1	1	1	1	1	1	1	1	1	1	1	1	1	1	1	0.2	0.733333	0.5	0.642857	0.533333	1	1	1	1	1	1	1	1	1	1	1	1	1	1	1	0.2	0.2	0.2	0.333333	#DIV/0!	0.733333
26	2018-09-01	1899-12-31 12:00:00	59	0.714286	0.642857	0.454545	0.461538	0.533333	1	1	1	1	1	1	1	1	1	1	1	1	1	1	1	0.133333	0.733333	0.428571	0.642857	0.4	1	1	1	1	1	1	1	1	1	1	1	1	1	1	1	0.2	0.2	0.2	0.333333	#DIV/0!	0.733333
27	2018-09-03	1899-12-31 12:00:00	61	0.714286	0.571429	0.363636	0.230769	0.4	1	1	1	1	1	1	1	1	1	1	1	1	1	1	1	0.0666667	0.2	0.214286	0.428571	0.266667	1	1	1	1	1	1	1	1	1	1	1	1	1	1	1	0.2	0.2	0.2	0.333333	#DIV/0!	0.733333
28	2018-09-05	1899-12-31 12:00:00	63	0.714286	0.571429	0.363636	0.230769	0.4	1	1	1	1	1	1	1	1	1	1	1	1	1	1	1	-0.0666667	0.133333	0.214286	0.357143	0.266667	1	1	1	1	1	1	1	1	1	1	1	1	1	1	1	0.2	0.2	0.2	0.333333	#DIV/0!	0.733333
29	2018-09-07	1899-12-31 12:00:00	65	0.5	0.428571	0.363636	0.0769231	0.2	1	1	1	1	1	1	1	1	1	1	1	1	1	1	1	-0.0666667	0.133333	0.214286	0.285714	0.266667	1	1	1	1	1	1	1	1	1	1	1	1	1	1	1	0.2	0.2	0.2	0.333333	#DIV/0!	0.733333
30	2018-09-10	1899-12-31 12:00:00	68	0.285714	0.428571	0.272727	0	0.2	1	1	1	1	1	1	1	1	1	1	1	1	1	1	1	-0.133333	0.133333	0.142857	0.142857	0.2	1	1	1	1	1	1	1	1	1	1	1	1	1	1	1	0.2	0.2	0.2	0.333333	#DIV/0!	0.733333
31	2018-09-12	1899-12-31 12:00:00	70	0.0714286	0.428571	0.272727	#DIV/0!	0.0666667	1	1	1	1	1	1	1	1	1	1	1	1	1	1	1	-0.133333	0.0666667	0.0714286	0.142857	0.2	1	1	1	1	1	1	1	1	1	1	1	1	1	1	1	0.2	0.2	0.2	0.333333	#DIV/0!	0.733333
32	2018-09-14	1899-12-31 12:00:00	72	0	0.285714	0.272727	#DIV/0!	0.0666667	1	1	1	1	1	1	1	1	1	1	1	1	1	1	1	-0.133333	0.0666667	0.0714286	0.0714286	0.2	1	1	1	1	1	1	1	1	1	1	1	1	1	1	1	0.2	0.2	0.2	0.333333	#DIV/0!	0.733333
33	2018-09-17	1899-12-31 12:00:00	75	#DIV/0!	0.285714	0.272727	#DIV/0!	0.0666667	1	1	1	1	1	1	1	1	1	1	1	1	1	1	1	-0.133333	0.0666667	0.0714286	0.0714286	0.133333	1	1	1	1	1	1	1	1	1	1	1	1	1	1	1	0.2	0.2	0.2	0.333333	#DIV/0!	0.733333
34	2018-09-19	1899-12-31 12:00:00	77	#DIV/0!	0.142857	0.272727	#DIV/0!	0	1	1	1	1	1	1	1	1	1	1	1	1	1	1	1	-0.133333	0.0666667	0.0714286	0.0714286	0.133333	1	1	1	1	1	1	1	1	1	1	1	1	1	1	1	0.2	0.2	0.2	0.333333	#DIV/0!	0.733333
35	2018-09-21	1899-12-31 12:00:00	79	#DIV/0!	0.0714286	0.272727	#DIV/0!	#DIV/0!	1	1	1	1	1	1	1	1	1	1	1	1	1	1	1	-0.133333	0.0666667	0.0714286	0.0714286	0.133333	1	1	1	1	1	1	1	1	1	1	1	1	1	1	1	0.2	0.2	0.2	0.333333	#DIV/0!	0.733333
36	2000-01-01	1899-12-31 12:00:00	79	#DIV/0!	0.0714286	0.272727	#DIV/0!	#DIV/0!	1	1	1	1	1	1	1	1	1	1	1	1	1	1	1	-0.133333	0.0666667	0.0714286	0.0714286	0.133333	1	1	1	1	1	1	1	1	1	1	1	1	1	1	1	0.2	0.2	0.2	0.333333	#DIV/0!	0.733333
37	2000-01-01	1899-12-31 12:00:00	79	#DIV/0!	0.0714286	0.272727	#DIV/0!	#DIV/0!	1	1	1	1	1	1	1	1	1	1	1	1	1	1	1	-0.133333	0.0666667	0.0714286	0.0714286	0.133333	1	1	1	1	1	1	1	1	1	1	1	1	1	1	1	0.2	0.2	0.2	0.333333	#DIV/0!	0.733333
38	2000-01-01	1899-12-31 12:00:00	79	#DIV/0!	0.0714286	0.272727	#DIV/0!	#DIV/0!	1	1	1	1	1	1	1	1	1	1	1	1	1	1	1	-0.133333	0.0666667	0.0714286	0.0714286	0.133333	1	1	1	1	1	1	1	1	1	1	1	1	1	1	1	0.2	0.2	0.2	0.333333	#DIV/0!	0.733333
39	2000-01-01	1899-12-31 12:00:00	79	#DIV/0!	0.0714286	0.272727	#DIV/0!	#DIV/0!	1	1	1	1	1	1	1	1	1	1	1	1	1	1	1	-0.133333	0.0666667	0.0714286	0.0714286	0.133333	1	1	1	1	1	1	1	1	1	1	1	1	1	1	1	0.2	0.2	0.2	0.333333	#DIV/0!	0.733333
40	2000-01-01	1899-12-31 12:00:00	79	#DIV/0!	0.0714286	0.272727	#DIV/0!	#DIV/0!	1	1	1	1	1	1	1	1	1	1	1	1	1	1	1	-0.133333	0.0666667	0.0714286	0.0714286	0.133333	1	1	1	1	1	1	1	1	1	1	1	1	1	1	1	0.2	0.2	0.2	0.333333	#DIV/0!	0.733333
41	2000-01-01	1899-12-31 12:00:00	79	#DIV/0!	0.0714286	0.272727	#DIV/0!	#DIV/0!	1	1	1	1	1	1	1	1	1	1	1	1	1	1	1	-0.133333	0.0666667	0.0714286	0.0714286	0.133333	1	1	1	1	1	1	1	1	1	1	1	1	1	1	1	0.2	0.2	0.2	0.333333	#DIV/0!	0.733333
42	2000-01-01	1899-12-31 12:00:00	79	#DIV/0!	0.0714286	0.272727	#DIV/0!	#DIV/0!	1	1	1	1	1	1	1	1	1	1	1	1	1	1	1	-0.133333	0.0666667	0.0714286	0.0714286	0.133333	1	1	1	1	1	1	1	1	1	1	1	1	1	1	1	0.2	0.2	0.2	0.333333	#DIV/0!	0.733333
43	2000-01-01	1899-12-31 12:00:00	79	#DIV/0!	0.0714286	0.272727	#DIV/0!	#DIV/0!	1	1	1	1	1	1	1	1	1	1	1	1	1	1	1	-0.133333	0.0666667	0.0714286	0.0714286	0.133333	1	1	1	1	1	1	1	1	1	1	1	1	1	1	1	0.2	0.2	0.2	0.333333	#DIV/0!	0.733333
44	2000-01-01	1899-12-31 12:00:00	79	#DIV/0!	0.0714286	0.272727	#DIV/0!	#DIV/0!	1	1	1	1	1	1	1	1	1	1	1	1	1	1	1	-0.133333	0.0666667	0.0714286	0.0714286	0.133333	1	1	1	1	1	1	1	1	1	1	1	1	1	1	1	0.2	0.2	0.2	0.333333	#DIV/0!	0.733333
45	2000-01-01	1899-12-31 12:00:00	79	#DIV/0!	0.0714286	0.272727	#DIV/0!	#DIV/0!	1	1	1	1	1	1	1	1	1	1	1	1	1	1	1	-0.133333	0.0666667	0.0714286	0.0714286	0.133333	1	1	1	1	1	1	1	1	1	1	1	1	1	1	1	0.2	0.2	0.2	0.333333	#DIV/0!	0.733333
46	2000-01-01	1899-12-31 12:00:00	79	#DIV/0!	0.0714286	0.272727	#DIV/0!	#DIV/0!	1	1	1	1	1	1	1	1	1	1	1	1	1	1	1	-0.133333	0.0666667	0.0714286	0.0714286	0.133333	1	1	1	1	1	1	1	1	1	1	1	1	1	1	1	0.2	0.2	0.2	0.333333	#DIV/0!	0.733333
47	2000-01-01	1899-12-31 12:00:00	79	#DIV/0!	0.0714286	0.272727	#DIV/0!	#DIV/0!	1	1	1	1	1	1	1	1	1	1	1	1	1	1	1	-0.133333	0.0666667	0.0714286	0.0714286	0.133333	1	1	1	1	1	1	1	1	1	1	1	1	1	1	1	0.2	0.2	0.2	0.333333	#DIV/0!	0.733333
48	2000-01-01	1899-12-31 12:00:00	79	#DIV/0!	0.0714286	0.272727	#DIV/0!	#DIV/0!	1	1	1	1	1	1	1	1	1	1	1	1	1	1	1	-0.133333	0.0666667	0.0714286	0.0714286	0.133333	1	1	1	1	1	1	1	1	1	1	1	1	1	1	1	0.2	0.2	0.2	0.333333	#DIV/0!	0.733333
49	2000-01-01	1899-12-31 12:00:00	79	#DIV/0!	0.0714286	0.272727	#DIV/0!	#DIV/0!	1	1	1	1	1	1	1	1	1	1	1	1	1	1	1	-0.133333	0.0666667	0.0714286	0.0714286	0.133333	1	1	1	1	1	1	1	1	1	1	1	1	1	1	1	0.2	0.2	0.2	0.333333	#DIV/0!	0.733333
50	2000-01-01	1899-12-31 12:00:00	79	#DIV/0!	0.0714286	0.272727	#DIV/0!	#DIV/0!	1	1	1	1	1	1	1	1	1	1	1	1	1	1	1	-0.133333	0.0666667	0.0714286	0.0714286	0.133333	1	1	1	1	1	1	1	1	1	1	1	1	1	1	1	0.2	0.2	0.2	0.333333	#DIV/0!	0.733333
51	2000-01-01	1899-12-31 12:00:00	79	#DIV/0!	0.0714286	0.272727	#DIV/0!	#DIV/0!	1	1	1	1	1	1	1	1	1	1	1	1	1	1	1	-0.133333	0.0666667	0.0714286	0.0714286	0.133333	1	1	1	1	1	1	1	1	1	1	1	1	1	1	1	0.2	0.2	0.2	0.333333	#DIV/0!	0.733333
52	2000-01-01	1899-12-31 12:00:00	79	#DIV/0!	0.0714286	0.272727	#DIV/0!	#DIV/0!	1	1	1	1	1	1	1	1	1	1	1	1	1	1	1	-0.133333	0.0666667	0.0714286	0.0714286	0.133333	1	1	1	1	1	1	1	1	1	1	1	1	1	1	1	0.2	0.2	0.2	0.333333	#DIV/0!	0.733333
53	2000-01-01	1899-12-31 12:00:00	79	#DIV/0!	0.0714286	0.272727	#DIV/0!	#DIV/0!	1	1	1	1	1	1	1	1	1	1	1	1	1	1	1	-0.133333	0.0666667	0.0714286	0.0714286	0.133333	1	1	1	1	1	1	1	1	1	1	1	1	1	1	1	0.2	0.2	0.2	0.333333	#DIV/0!	0.733333
54	2000-01-01	1899-12-31 12:00:00	79	#DIV/0!	0.0714286	0.272727	#DIV/0!	#DIV/0!	1	1	1	1	1	1	1	1	1	1	1	1	1	1	1	-0.133333	0.0666667	0.0714286	0.0714286	0.133333	1	1	1	1	1	1	1	1	1	1	1	1	1	1	1	0.2	0.2	0.2	0.333333	#DIV/0!	0.733333
55	2000-01-01	1899-12-31 12:00:00	79	#DIV/0!	0.0714286	0.272727	#DIV/0!	#DIV/0!	1	1	1	1	1	1	1	1	1	1	1	1	1	1	1	-0.133333	0.0666667	0.0714286	0.0714286	0.133333	1	1	1	1	1	1	1	1	1	1	1	1	1	1	1	0.2	0.2	0.2	0.333333	#DIV/0!	0.733333
56	2000-01-01	1899-12-31 12:00:00	79	#DIV/0!	0.0714286	0.272727	#DIV/0!	#DIV/0!	1	1	1	1	1	1	1	1	1	1	1	1	1	1	1	-0.133333	0.0666667	0.0714286	0.0714286	0.133333	1	1	1	1	1	1	1	1	1	1	1	1	1	1	1	0.2	0.2	0.2	0.333333	#DIV/0!	0.733333
57	2000-01-01	1899-12-31 12:00:00	79	#DIV/0!	0.0714286	0.272727	#DIV/0!	#DIV/0!	1	1	1	1	1	1	1	1	1	1	1	1	1	1	1	-0.133333	0.0666667	0.0714286	0.0714286	0.133333	1	1	1	1	1	1	1	1	1	1	1	1	1	1	1	0.2	0.2	0.2	0.333333	#DIV/0!	0.733333
58	2000-01-01	1899-12-31 12:00:00	79	#DIV/0!	0.0714286	0.272727	#DIV/0!	#DIV/0!	1	1	1	1	1	1	1	1	1	1	1	1	1	1	1	-0.133333	0.0666667	0.0714286	0.0714286	0.133333	1	1	1	1	1	1	1	1	1	1	1	1	1	1	1	0.2	0.2	0.2	0.333333	#DIV/0!	0.733333
59	2000-01-01	1899-12-31 12:00:00	79	#DIV/0!	0.0714286	0.272727	#DIV/0!	#DIV/0!	1	1	1	1	1	1	1	1	1	1	1	1	1	1	1	-0.133333	0.0666667	0.0714286	0.0714286	0.133333	1	1	1	1	1	1	1	1	1	1	1	1	1	1	1	0.2	0.2	0.2	0.333333	#DIV/0!	0.733333
60	2000-01-01	1899-12-31 12:00:00	79	#DIV/0!	0.0714286	0.272727	#DIV/0!	#DIV/0!	1	1	1	1	1	1	1	1	1	1	1	1	1	1	1	-0.133333	0.0666667	0.0714286	0.0714286	0.133333	1	1	1	1	1	1	1	1	1	1	1	1	1	1	1	0.2	0.2	0.2	0.333333	#DIV/0!	0.733333
61	2000-01-01	1899-12-31 12:00:00	79	#DIV/0!	0.0714286	0.272727	#DIV/0!	#DIV/0!	1	1	1	1	1	1	1	1	1	1	1	1	1	1	1	-0.133333	0.0666667	0.0714286	0.0714286	0.133333	1	1	1	1	1	1	1	1	1	1	1	1	1	1	1	0.2	0.2	0.2	0.333333	#DIV/0!	0.733333
62	2000-01-01	1899-12-31 12:00:00	79	#DIV/0!	0.0714286	0.272727	#DIV/0!	#DIV/0!	1	1	1	1	1	1	1	1	1	1	1	1	1	1	1	-0.133333	0.0666667	0.0714286	0.0714286	0.133333	1	1	1	1	1	1	1	1	1	1	1	1	1	1	1	0.2	0.2	0.2	0.333333	#DIV/0!	0.733333
63	2000-01-01	1899-12-31 12:00:00	79	#DIV/0!	0.0714286	0.272727	#DIV/0!	#DIV/0!	1	1	1	1	1	1	1	1	1	1	1	1	1	1	1	-0.133333	0.0666667	0.0714286	0.0714286	0.133333	1	1	1	1	1	1	1	1	1	1	1	1	1	1	1	0.2	0.2	0.2	0.333333	#DIV/0!	0.733333
64	2000-01-01	1899-12-31 12:00:00	79	#DIV/0!	0.0714286	0.272727	#DIV/0!	#DIV/0!	1	1	1	1	1	1	1	1	1	1	1	1	1	1	1	-0.133333	0.0666667	0.0714286	0.0714286	0.133333	1	1	1	1	1	1	1	1	1	1	1	1	1	1	1	0.2	0.2	0.2	0.333333	#DIV/0!	0.733333
65	2000-01-01	1899-12-31 12:00:00	79	#DIV/0!	0.0714286	0.272727	#DIV/0!	#DIV/0!	1	1	1	1	1	1	1	1	1	1	1	1	1	1	1	-0.133333	0.0666667	0.0714286	0.0714286	0.133333	1	1	1	1	1	1	1	1	1	1	1	1	1	1	1	0.2	0.2	0.2	0.333333	#DIV/0!	0.733333
66	2000-01-01	1899-12-31 12:00:00	79	#DIV/0!	0.0714286	0.272727	#DIV/0!	#DIV/0!	1	1	1	1	1	1	1	1	1	1	1	1	1	1	1	-0.133333	0.0666667	0.0714286	0.0714286	0.133333	1	1	1	1	1	1	1	1	1	1	1	1	1	1	1	0.2	0.2	0.2	0.333333	#DIV/0!	0.733333
67	2000-01-01	1899-12-31 12:00:00	79	#DIV/0!	0.0714286	0.272727	#DIV/0!	#DIV/0!	1	1	1	1	1	1	1	1	1	1	1	1	1	1	1	-0.133333	0.0666667	0.0714286	0.0714286	0.133333	1	1	1	1	1	1	1	1	1	1	1	1	1	1	1	0.2	0.2	0.2	0.333333	#DIV/0!	0.733333
68	2000-01-01	1899-12-31 12:00:00	79	#DIV/0!	0.0714286	0.272727	#DIV/0!	#DIV/0!	1	1	1	1	1	1	1	1	1	1	1	1	1	1	1	-0.133333	0.0666667	0.0714286	0.0714286	0.133333	1	1	1	1	1	1	1	1	1	1	1	1	1	1	1	0.2	0.2	0.2	0.333333	#DIV/0!	0.733333
69	2000-01-01	1899-12-31 12:00:00	79	#DIV/0!	0.0714286	0.272727	#DIV/0!	#DIV/0!	1	1	1	1	1	1	1	1	1	1	1	1	1	1	1	-0.133333	0.0666667	0.0714286	0.0714286	0.133333	1	1	1	1	1	1	1	1	1	1	1	1	1	1	1	0.2	0.2	0.2	0.333333	#DIV/0!	0.733333
70	2000-01-01	1899-12-31 12:00:00	79	#DIV/0!	0.0714286	0.272727	#DIV/0!	#DIV/0!	1	1	1	1	1	1	1	1	1	1	1	1	1	1	1	-0.133333	0.0666667	0.0714286	0.0714286	0.133333	1	1	1	1	1	1	1	1	1	1	1	1	1	1	1	0.2	0.2	0.2	0.333333	#DIV/0!	0.733333
71	2000-01-01	1899-12-31 12:00:00	79	#DIV/0!	0.0714286	0.272727	#DIV/0!	#DIV/0!	1	1	1	1	1	1	1	1	1	1	1	1	1	1	1	-0.133333	0.0666667	0.0714286	0.0714286	0.133333	1	1	1	1	1	1	1	1	1	1	1	1	1	1	1	0.2	0.2	0.2	0.333333	#DIV/0!	0.733333
72	2000-01-01	1899-12-31 12:00:00	79	#DIV/0!	0.0714286	0.272727	#DIV/0!	#DIV/0!	1	1	1	1	1	1	1	1	1	1	1	1	1	1	1	-0.133333	0.0666667	0.0714286	0.0714286	0.133333	1	1	1	1	1	1	1	1	1	1	1	1	1	1	1	0.2	0.2	0.2	0.333333	#DIV/0!	0.733333
73	2000-01-01	1899-12-31 12:00:00	79	#DIV/0!	0.0714286	0.272727	#DIV/0!	#DIV/0!	1	1	1	1	1	1	1	1	1	1	1	1	1	1	1	-0.133333	0.0666667	0.0714286	0.0714286	0.133333	1	1	1	1	1	1	1	1	1	1	1	1	1	1	1	0.2	0.2	0.2	0.333333	#DIV/0!	0.733333
74	2000-01-01	1899-12-31 12:00:00	79	#DIV/0!	0.0714286	0.272727	#DIV/0!	#DIV/0!	1	1	1	1	1	1	1	1	1	1	1	1	1	1	1	-0.133333	0.0666667	0.0714286	0.0714286	0.133333	1	1	1	1	1	1	1	1	1	1	1	1	1	1	1	0.2	0.2	0.2	0.333333	#DIV/0!	0.733333
75	2000-01-01	1899-12-31 12:00:00	79	#DIV/0!	0.0714286	0.272727	#DIV/0!	#DIV/0!	1	1	1	1	1	1	1	1	1	1	1	1	1	1	1	-0.133333	0.0666667	0.0714286	0.0714286	0.133333	1	1	1	1	1	1	1	1	1	1	1	1	1	1	1	0.2	0.2	0.2	0.333333	#DIV/0!	0.733333
[truncated: 154 more columns]

## Sheet: log rank data
deaths
log-rank test data												at risk											Expected values
day	(G4C2)36/+ PBS RU-	(G4C2)36/+ INS RU-	(G4C2)36/+ PBS RU+	(G4C2)36 INS RU+	condition e	condition f	condition g	condition h	condition i	condition j		(G4C2)36/+ PBS RU-	(G4C2)36/+ INS RU-	(G4C2)36/+ PBS RU+	(G4C2)36 INS RU+	condition e	condition f	condition g	condition h	condition i	condition j		(G4C2)36/+ PBS RU-									(G4C2)36/+ INS RU-								(G4C2)36/+ PBS RU+							(G4C2)36 INS RU+
sum	71	72	78	78	0	0	0	0	0	0													(G4C2)36/+ INS RU-	(G4C2)36/+ PBS RU+	(G4C2)36 INS RU+	condition e	condition f	condition g	condition h	condition i	condition j	(G4C2)36/+ PBS RU+	(G4C2)36 INS RU+	condition e	condition f	condition g	condition h	condition i	condition j	(G4C2)36 INS RU+	condition e	condition f	condition g	condition h	condition i	condition j	condition e	condition f	condition g
0	0	0	0	0	0	0	0	0	0	0		71	72	78	78	0	0	0	0	0	0		0	0	0	0	0	0	0	0	0	0	0	0	0	0	0	0	0	0	0	0	0	0	0	0	0	0	0
0	0	0	0	0	0	0	0	0	0	0		71	72	78	78	0	0	0	0	0	0		0	0	0	0	0	0	0	0	0	0	0	0	0	0	0	0	0	0	0	0	0	0	0	0	0	0	0
2	0	0	0	0	0	0	0	0	0	0		71	72	78	78	0	0	0	0	0	0		0	0	0	0	0	0	0	0	0	0	0	0	0	0	0	0	0	0	0	0	0	0	0	0	0	0	0
5	0	0	1	0	0	0	0	0	0	0		68	71	78	77	0	0	0	0	0	0		0	0.465753	0	0	0	0	0	0	0	0.47651	0	0	0	0	0	0	0	0.503226	1	1	1	1	1	1	0	0	0
7	0	0	0	0	0	0	0	0	0	0		68	71	77	77	0	0	0	0	0	0		0	0	0	0	0	0	0	0	0	0	0	0	0	0	0	0	0	0	0	0	0	0	0	0	0	0	0
9	1	1	13	1	0	0	0	0	0	0		68	71	77	77	0	0	0	0	0	0		0.978417	6.56552	0.937931	1	1	1	1	1	1	6.71622	0.959459	1	1	1	1	1	1	7	13	13	13	13	13	13	1	1	1
12	0	0	13	17	0	0	0	0	0	0		67	69	64	75	0	0	0	0	0	0		0	6.64885	8.02113	0	0	0	0	0	0	6.74436	8.14583	0	0	0	0	0	0	13.8129	13	13	13	13	13	13	17	17	17
14	0	0	4	2	0	0	0	0	0	0		67	69	51	57	0	0	0	0	0	0		0	2.27119	1.08065	0	0	0	0	0	0	2.3	1.09524	0	0	0	0	0	0	2.83333	4	4	4	4	4	4	2	2	2
16	1	0	1	1	0	0	0	0	0	0		67	69	47	55	0	0	0	0	0	0		0.492647	1.17544	1.09836	1	1	1	1	1	1	0.594828	0.556452	0	0	0	0	0	0	0.921569	1	1	1	1	1	1	1	1	1
19	0	0	8	10	0	0	0	0	0	0		65	69	46	54	0	0	0	0	0	0		0	4.68468	5.46218	0	0	0	0	0	0	4.8	5.60976	0	0	0	0	0	0	8.28	8	8	8	8	8	8	10	10	10
21	0	0	4	6	0	0	0	0	0	0		65	69	38	44	0	0	0	0	0	0		0	2.52427	3.57798	0	0	0	0	0	0	2.57944	3.66372	0	0	0	0	0	0	4.63415	4	4	4	4	4	4	6	6	6
23	0	0	7	5	0	0	0	0	0	0		64	69	34	38	0	0	0	0	0	0		0	4.57143	3.13725	0	0	0	0	0	0	4.68932	3.2243	0	0	0	0	0	0	5.66667	7	7	7	7	7	7	5	5	5
26	0	0	6	5	0	0	0	0	0	0		64	69	27	33	0	0	0	0	0	0		0	4.21978	3.29897	0	0	0	0	0	0	4.3125	3.38235	0	0	0	0	0	0	4.95	6	6	6	6	6	6	5	5	5
28	0	1	5	5	0	0	0	0	0	0		64	69	21	28	0	0	0	0	0	0		0.481203	3.76471	3.47826	0	0	0	0	0	0	4.6	4.26804	1	1	1	1	1	1	4.28571	5	5	5	5	5	5	5	5	5
30	0	0	6	4	0	0	0	0	0	0		63	68	16	23	0	0	0	0	0	0		0	4.78481	2.93023	0	0	0	0	0	0	4.85714	2.98901	0	0	0	0	0	0	4.10256	6	6	6	6	6	6	4	4	4
33	0	1	3	6	0	0	0	0	0	0		63	68	10	19	0	0	0	0	0	0		0.480916	2.58904	4.60976	0	0	0	0	0	0	3.48718	5.47126	1	1	1	1	1	1	3.10345	3	3	3	3	3	3	6	6	6
35	0	0	0	0	0	0	0	0	0	0		62	67	0	13	0	0	0	0	0	0		0	0	0	0	0	0	0	0	0	0	0	0	0	0	0	0	0	0	0	0	0	0	0	0	0	0	0
37	0	0	0	2	0	0	0	0	0	0		62	67	0	13	0	0	0	0	0	0		0	0	1.65333	0	0	0	0	0	0	0	1.675	0	0	0	0	0	0	0	0	0	0	0	0	0	2	2	2
40	0	0	0	0	0	0	0	0	0	0		62	67	0	11	0	0	0	0	0	0		0	0	0	0	0	0	0	0	0	0	0	0	0	0	0	0	0	0	0	0	0	0	0	0	0	0	0
42	0	2	0	3	0	0	0	0	0	0		61	67	0	11	0	0	0	0	0	0		0.953125	0	2.54167	0	0	0	0	0	0	2	4.29487	2	2	2	2	2	2	0	0	0	0	0	0	0	3	3	3
44	1	0	0	0	0	0	0	0	0	0		61	65	0	0	0	0	0	0	0	0		0.484127	1	1	1	1	1	1	1	1	0	0	0	0	0	0	0	0	0	0	0	0	0	0	0	0	0	0
47	6	7	0	0	0	0	0	0	0	0		60	65	0	0	0	0	0	0	0	0		6.24	6	6	6	6	6	6	6	6	7	7	7	7	7	7	7	7	0	0	0	0	0	0	0	0	0	0
49	2	7	0	0	0	0	0	0	0	0		54	58	0	0	0	0	0	0	0	0		4.33929	2	2	2	2	2	2	2	2	7	7	7	7	7	7	7	7	0	0	0	0	0	0	0	0	0	0
51	6	0	0	0	0	0	0	0	0	0		52	51	0	0	0	0	0	0	0	0		3.02913	6	6	6	6	6	6	6	6	0	0	0	0	0	0	0	0	0	0	0	0	0	0	0	0	0	0
54	4	11	0	0	0	0	0	0	0	0		46	51	0	0	0	0	0	0	0	0		7.1134	4	4	4	4	4	4	4	4	11	11	11	11	11	11	11	11	0	0	0	0	0	0	0	0	0	0
56	4	5	0	0	0	0	0	0	0	0		42	40	0	0	0	0	0	0	0	0		4.60976	4	4	4	4	4	4	4	4	5	5	5	5	5	5	5	5	0	0	0	0	0	0	0	0	0	0
59	4	4	0	0	0	0	0	0	0	0		38	35	0	0	0	0	0	0	0	0		4.16438	4	4	4	4	4	4	4	4	4	4	4	4	4	4	4	4	0	0	0	0	0	0	0	0	0	0
61	7	17	0	0	0	0	0	0	0	0		34	31	0	0	0	0	0	0	0	0		12.5538	7	7	7	7	7	7	7	7	17	17	17	17	17	17	17	17	0	0	0	0	0	0	0	0	0	0
63	0	4	0	0	0	0	0	0	0	0		27	14	0	0	0	0	0	0	0	0		2.63415	0	0	0	0	0	0	0	0	4	4	4	4	4	4	4	4	0	0	0	0	0	0	0	0	0	0
65	10	1	0	0	0	0	0	0	0	0		27	10	0	0	0	0	0	0	0	0		8.02703	10	10	10	10	10	10	10	10	1	1	1	1	1	1	1	1	0	0	0	0	0	0	0	0	0	0
68	5	5	0	0	0	0	0	0	0	0		17	9	0	0	0	0	0	0	0	0		6.53846	5	5	5	5	5	5	5	5	5	5	5	5	5	5	5	5	0	0	0	0	0	0	0	0	0	0
70	5	2	0	0	0	0	0	0	0	0		12	4	0	0	0	0	0	0	0	0		5.25	5	5	5	5	5	5	5	5	2	2	2	2	2	2	2	2	0	0	0	0	0	0	0	0	0	0
72	3	1	0	0	0	0	0	0	0	0		7	2	0	0	0	0	0	0	0	0		3.11111	3	3	3	3	3	3	3	3	1	1	1	1	1	1	1	1	0	0	0	0	0	0	0	0	0	0
75	0	1	0	0	0	0	0	0	0	0		4	1	0	0	0	0	0	0	0	0		0.8	0	0	0	0	0	0	0	0	1	1	1	1	1	1	1	1	0	0	0	0	0	0	0	0	0	0
77	3	0	0	0	0	0	0	0	0	0		4	0	0	0	0	0	0	0	0	0		3	3	3	3	3	3	3	3	3	0	0	0	0	0	0	0	0	0	0	0	0	0	0	0	0	0	0
79	1	0	0	0	0	0	0	0	0	0		1	0	0	0	0	0	0	0	0	0		1	1	1	1	1	1	1	1	1	0	0	0	0	0	0	0	0	0	0	0	0	0	0	0	0	0	0
79	0	0	0	0	0	0	0	0	0	0		0	0	0	0	0	0	0	0	0	0		0	0	0	0	0	0	0	0	0	0	0	0	0	0	0	0	0	0	0	0	0	0	0	0	0	0	0
79	0	0	0	0	0	0	0	0	0	0		0	0	0	0	0	0	0	0	0	0		0	0	0	0	0	0	0	0	0	0	0	0	0	0	0	0	0	0	0	0	0	0	0	0	0	0	0
79	0	0	0	0	0	0	0	0	0	0		0	0	0	0	0	0	0	0	0	0		0	0	0	0	0	0	0	0	0	0	0	0	0	0	0	0	0	0	0	0	0	0	0	0	0	0	0
79	0	0	0	0	0	0	0	0	0	0		0	0	0	0	0	0	0	0	0	0		0	0	0	0	0	0	0	0	0	0	0	0	0	0	0	0	0	0	0	0	0	0	0	0	0	0	0
79	0	0	0	0	0	0	0	0	0	0		0	0	0	0	0	0	0	0	0	0		0	0	0	0	0	0	0	0	0	0	0	0	0	0	0	0	0	0	0	0	0	0	0	0	0	0	0
79	0	0	0	0	0	0	0	0	0	0		0	0	0	0	0	0	0	0	0	0		0	0	0	0	0	0	0	0	0	0	0	0	0	0	0	0	0	0	0	0	0	0	0	0	0	0	0
79	0	0	0	0	0	0	0	0	0	0		0	0	0	0	0	0	0	0	0	0		0	0	0	0	0	0	0	0	0	0	0	0	0	0	0	0	0	0	0	0	0	0	0	0	0	0	0
79	0	0	0	0	0	0	0	0	0	0		0	0	0	0	0	0	0	0	0	0		0	0	0	0	0	0	0	0	0	0	0	0	0	0	0	0	0	0	0	0	0	0	0	0	0	0	0
79	0	0	0	0	0	0	0	0	0	0		0	0	0	0	0	0	0	0	0	0		0	0	0	0	0	0	0	0	0	0	0	0	0	0	0	0	0	0	0	0	0	0	0	0	0	0	0
79	0	0	0	0	0	0	0	0	0	0		0	0	0	0	0	0	0	0	0	0		0	0	0	0	0	0	0	0	0	0	0	0	0	0	0	0	0	0	0	0	0	0	0	0	0	0	0
79	0	0	0	0	0	0	0	0	0	0		0	0	0	0	0	0	0	0	0	0		0	0	0	0	0	0	0	0	0	0	0	0	0	0	0	0	0	0	0	0	0	0	0	0	0	0	0
79	0	0	0	0	0	0	0	0	0	0		0	0	0	0	0	0	0	0	0	0		0	0	0	0	0	0	0	0	0	0	0	0	0	0	0	0	0	0	0	0	0	0	0	0	0	0	0
79	0	0	0	0	0	0	0	0	0	0		0	0	0	0	0	0	0	0	0	0		0	0	0	0	0	0	0	0	0	0	0	0	0	0	0	0	0	0	0	0	0	0	0	0	0	0	0
79	0	0	0	0	0	0	0	0	0	0		0	0	0	0	0	0	0	0	0	0		0	0	0	0	0	0	0	0	0	0	0	0	0	0	0	0	0	0	0	0	0	0	0	0	0	0	0
79	0	0	0	0	0	0	0	0	0	0		0	0	0	0	0	0	0	0	0	0		0	0	0	0	0	0	0	0	0	0	0	0	0	0	0	0	0	0	0	0	0	0	0	0	0	0	0
79	0	0	0	0	0	0	0	0	0	0		0	0	0	0	0	0	0	0	0	0		0	0	0	0	0	0	0	0	0	0	0	0	0	0	0	0	0	0	0	0	0	0	0	0	0	0	0
79	0	0	0	0	0	0	0	0	0	0		0	0	0	0	0	0	0	0	0	0		0	0	0	0	0	0	0	0	0	0	0	0	0	0	0	0	0	0	0	0	0	0	0	0	0	0	0
79	0	0	0	0	0	0	0	0	0	0		0	0	0	0	0	0	0	0	0	0		0	0	0	0	0	0	0	0	0	0	0	0	0	0	0	0	0	0	0	0	0	0	0	0	0	0	0
79	0	0	0	0	0	0	0	0	0	0		0	0	0	0	0	0	0	0	0	0		0	0	0	0	0	0	0	0	0	0	0	0	0	0	0	0	0	0	0	0	0	0	0	0	0	0	0
79	0	0	0	0	0	0	0	0	0	0		0	0	0	0	0	0	0	0	0	0		0	0	0	0	0	0	0	0	0	0	0	0	0	0	0	0	0	0	0	0	0	0	0	0	0	0	0
79	0	0	0	0	0	0	0	0	0	0		0	0	0	0	0	0	0	0	0	0		0	0	0	0	0	0	0	0	0	0	0	0	0	0	0	0	0	0	0	0	0	0	0	0	0	0	0
79	0	0	0	0	0	0	0	0	0	0		0	0	0	0	0	0	0	0	0	0		0	0	0	0	0	0	0	0	0	0	0	0	0	0	0	0	0	0	0	0	0	0	0	0	0	0	0
79	0	0	0	0	0	0	0	0	0	0		0	0	0	0	0	0	0	0	0	0		0	0	0	0	0	0	0	0	0	0	0	0	0	0	0	0	0	0	0	0	0	0	0	0	0	0	0
79	0	0	0	0	0	0	0	0	0	0		0	0	0	0	0	0	0	0	0	0		0	0	0	0	0	0	0	0	0	0	0	0	0	0	0	0	0	0	0	0	0	0	0	0	0	0	0
79	0	0	0	0	0	0	0	0	0	0		0	0	0	0	0	0	0	0	0	0		0	0	0	0	0	0	0	0	0	0	0	0	0	0	0	0	0	0	0	0	0	0	0	0	0	0	0
79	0	0	0	0	0	0	0	0	0	0		0	0	0	0	0	0	0	0	0	0		0	0	0	0	0	0	0	0	0	0	0	0	0	0	0	0	0	0	0	0	0	0	0	0	0	0	0
79	0	0	0	0	0	0	0	0	0	0		0	0	0	0	0	0	0	0	0	0		0	0	0	0	0	0	0	0	0	0	0	0	0	0	0	0	0	0	0	0	0	0	0	0	0	0	0
79	0	0	0	0	0	0	0	0	0	0		0	0	0	0	0	0	0	0	0	0		0	0	0	0	0	0	0	0	0	0	0	0	0	0	0	0	0	0	0	0	0	0	0	0	0	0	0
79	0	0	0	0	0	0	0	0	0	0		0	0	0	0	0	0	0	0	0	0		0	0	0	0	0	0	0	0	0	0	0	0	0	0	0	0	0	0	0	0	0	0	0	0	0	0	0
79	0	0	0	0	0	0	0	0	0	0		0	0	0	0	0	0	0	0	0	0		0	0	0	0	0	0	0	0	0	0	0	0	0	0	0	0	0	0	0	0	0	0	0	0	0	0	0
79	0	0	0	0	0	0	0	0	0	0		0	0	0	0	0	0	0	0	0	0		0	0	0	0	0	0	0	0	0	0	0	0	0	0	0	0	0	0	0	0	0	0	0	0	0	0	0
79	0	0	0	0	0	0	0	0	0	0		0	0	0	0	0	0	0	0	0	0		0	0	0	0	0	0	0	0	0	0	0	0	0	0	0	0	0	0	0	0	0	0	0	0	0	0	0
79	0	0	0	0	0	0	0	0	0	0		0	0	0	0	0	0	0	0	0	0		0	0	0	0	0	0	0	0	0	0	0	0	0	0	0	0	0	0	0	0	0	0	0	0	0	0	0
79	0	0	0	0	0	0	0	0	0	0		0	0	0	0	0	0	0	0	0	0		0	0	0	0	0	0	0	0	0	0	0	0	0	0	0	0	0	0	0	0	0	0	0	0	0	0	0
79	0	0	0	0	0	0	0	0	0	0		0	0	0	0	0	0	0	0	0	0		0	0	0	0	0	0	0	0	0	0	0	0	0	0	0	0	0	0	0	0	0	0	0	0	0	0	0
79	0	0	0	0	0	0	0	0	0	0		0	0	0	0	0	0	0	0	0	0		0	0	0	0	0	0	0	0	0	0	0	0	0	0	0	0	0	0	0	0	0	0	0	0	0	0	0
79	0	0	0	0	0	0	0	0	0	0		0	0	0	0	0	0	0	0	0	0		0	0	0	0	0	0	0	0	0	0	0	0	0	0	0	0	0	0	0	0	0	0	0	0	0	0	0
79	0	0	0	0	0	0	0	0	0	0		0	0	0	0	0	0	0	0	0	0		0	0	0	0	0	0	0	0	0	0	0	0	0	0	0	0	0	0	0	0	0	0	0	0	0	0	0
79	0	0	0	0	0	0	0	0	0	0		0	0	0	0	0	0	0	0	0	0		0	0	0	0	0	0	0	0	0	0	0	0	0	0	0	0	0	0	0	0	0	0	0	0	0	0	0
79	0	0	0	0	0	0	0	0	0	0		0	0	0	0	0	0	0	0	0	0		0	0	0	0	0	0	0	0	0	0	0	0	0	0	0	0	0	0	0	0	0	0	0	0	0	0	0
sum	63	70	71	67	0	0	0	0	0	0													76.281	105.265	102.828	63	63	63	63	63	63	113.157	110.335	70	70	70	70	70	70	60.0936	71	71	71	71	71	71	67	67	67
censors
day	(G4C2)36/+ PBS RU-	(G4C2)36/+ INS RU-	(G4C2)36/+ PBS RU+	(G4C2)36 INS RU+	condition e	condition f	condition g	condition h	condition i	condition j
0	0	0	0	0	0	0	0	0	0	0
0	0	0	0	0	0	0	0	0	0	0
2	3	1	0	1	0	0	0	0	0	0
5	0	0	0	0	0	0	0	0	0	0
7	0	0	0	0	0	0	0	0	0	0
9	0	1	0	1	0	0	0	0	0	0
12	0	0	0	1	0	0	0	0	0	0
14	0	0	0	0	0	0	0	0	0	0
16	1	0	0	0	0	0	0	0	0	0
19	0	0	0	0	0	0	0	0	0	0
21	1	0	0	0	0	0	0	0	0	0
23	0	0	0	0	0	0	0	0	0	0
26	0	0	0	0	0	0	0	0	0	0
28	1	0	0	0	0	0	0	0	0	0
30	0	0	0	0	0	0	0	0	0	0
33	1	0	7	0	0	0	0	0	0	0
35	0	0	0	0	0	0	0	0	0	0
37	0	0	0	0	0	0	0	0	0	0
40	1	0	0	0	0	0	0	0	0	0
42	0	0	0	8	0	0	0	0	0	0
44	0	0	0	0	0	0	0	0	0	0
47	0	0	0	0	0	0	0	0	0	0
49	0	0	0	0	0	0	0	0	0	0
51	0	0	0	0	0	0	0	0	0	0
54	0	0	0	0	0	0	0	0	0	0
56	0	0	0	0	0	0	0	0	0	0
59	0	0	0	0	0	0	0	0	0	0
61	0	0	0	0	0	0	0	0	0	0
63	0	0	0	0	0	0	0	0	0	0
65	0	0	0	0	0	0	0	0	0	0
68	0	0	0	0	0	0	0	0	0	0
70	0	0	0	0	0	0	0	0	0	0
72	0	0	0	0	0	0	0	0	0	0
75	0	0	0	0	0	0	0	0	0	0
77	0	0	0	0	0	0	0	0	0	0
79	0	0	0	0	0	0	0	0	0	0
79	0	0	0	0	0	0	0	0	0	0
79	0	0	0	0	0	0	0	0	0	0
79	0	0	0	0	0	0	0	0	0	0
79	0	0	0	0	0	0	0	0	0	0
79	0	0	0	0	0	0	0	0	0	0
79	0	0	0	0	0	0	0	0	0	0
79	0	0	0	0	0	0	0	0	0	0
79	0	0	0	0	0	0	0	0	0	0
79	0	0	0	0	0	0	0	0	0	0
79	0	0	0	0	0	0	0	0	0	0
79	0	0	0	0	0	0	0	0	0	0
79	0	0	0	0	0	0	0	0	0	0
79	0	0	0	0	0	0	0	0	0	0
79	0	0	0	0	0	0	0	0	0	0
79	0	0	0	0	0	0	0	0	0	0
79	0	0	0	0	0	0	0	0	0	0
79	0	0	0	0	0	0	0	0	0	0
79	0	0	0	0	0	0	0	0	0	0
79	0	0	0	0	0	0	0	0	0	0
79	0	0	0	0	0	0	0	0	0	0
79	0	0	0	0	0	0	0	0	0	0
79	0	0	0	0	0	0	0	0	0	0
79	0	0	0	0	0	0	0	0	0	0
79	0	0	0	0	0	0	0	0	0	0
79	0	0	0	0	0	0	0	0	0	0
79	0	0	0	0	0	0	0	0	0	0
79	0	0	0	0	0	0	0	0	0	0
79	0	0	0	0	0	0	0	0	0	0
79	0	0	0	0	0	0	0	0	0	0
79	0	0	0	0	0	0	0	0	0	0
79	0	0	0	0	0	0	0	0	0	0
79	0	0	0	0	0	0	0	0	0	0
79	0	0	0	0	0	0	0	0	0	0
79	0	0	0	0	0	0	0	0	0	0
79	0	0	0	0	0	0	0	0	0	0
79	0	0	0	0	0	0	0	0	0	0
79	0	0	0	0	0	0	0	0	0	0
79	0	0	0	0	0	0	0	0	0	0
79	0	0	0	0	0	0	0	0	0	0
79	0	0	0	0	0	0	0	0	0	0
[truncated: 63 more columns]

## Sheet: mort data
					deaths
																Nx	number of survivors											proportion of survivors												Ux	negative log of proportion of daily survivors
	count			day	(G4C2)36/+ PBS RU-	(G4C2)36/+ INS RU-	(G4C2)36/+ PBS RU+	(G4C2)36 INS RU+	condition e	condition f	condition g	condition h	condition i	condition j		day	(G4C2)36/+ PBS RU-	(G4C2)36/+ INS RU-	(G4C2)36/+ PBS RU+	(G4C2)36 INS RU+	condition e	condition f	condition g	condition h	condition i	condition j		day	(G4C2)36/+ PBS RU-	(G4C2)36/+ INS RU-	(G4C2)36/+ PBS RU+	(G4C2)36 INS RU+	condition e	condition f	condition g	condition h	condition i	condition j		day	(G4C2)36/+ PBS RU-	(G4C2)36/+ INS RU-	(G4C2)36/+ PBS RU+	(G4C2)36 INS RU+	condition e	condition f	condition g	condition h	condition i
	date	time														est 0	71	72	78	78	100	100	100	100	100	100
0	2018-07-04	1899-12-31 12:00:00		0													71	72	78	78	0	0	0	0	0	0		0	1	1	1	1	1	1	1	1	1	1		0	0	0	0	0	0	0	0	0	0
1	2018-07-04	1899-12-31 12:00:00		0	0	0	0	0	0	0	0	0	0	0		0	71	72	78	78	100	100	100	100	100	100		0	1	1	1	1	1	1	1	1	1	1		0	0	0	0	0	0	0	0	0	0
2	2018-07-06	1899-12-31 12:00:00		2	0	0	0	0	0	0	0	0	0	0		2	68	71	78	77	100	100	100	100	100	100		2	1	1	1	1	1	1	1	1	1	1		2	0	0	0	0	0	0	0	0	0
3	2018-07-09	1899-12-31 12:00:00		5	0	0	1	0	0	0	0	0	0	0		5	68	71	77	77	100	100	100	100	100	100		5	1	1	0.987179	1	1	1	1	1	1	1		5	0	0	0.0129034	0	0	0	0	0	0
4	2018-07-11	1899-12-31 12:00:00		7	0	0	0	0	0	0	0	0	0	0		7	68	71	77	77	100	100	100	100	100	100		7	1	1	0.987179	1	1	1	1	1	1	1		7	0	0	0	0	0	0	0	0	0
5	2018-07-13	1899-12-31 12:00:00		9	1	1	13	1	0	0	0	0	0	0		9	67	69	64	75	100	100	100	100	100	100		9	0.985294	0.985915	0.820513	0.987013	1	1	1	1	1	1		9	0.0148151	0.0141846	0.184922	0.0130721	0	0	0	0	0
6	2018-07-16	1899-12-31 12:00:00		12	0	0	13	17	0	0	0	0	0	0		12	67	69	51	57	100	100	100	100	100	100		12	0.985294	0.985915	0.653846	0.76329	1	1	1	1	1	1		12	0	0	0.227057	0.257045	0	0	0	0	0
7	2018-07-18	1899-12-31 12:00:00		14	0	0	4	2	0	0	0	0	0	0		14	67	69	47	55	100	100	100	100	100	100		14	0.985294	0.985915	0.602564	0.736508	1	1	1	1	1	1		14	0	0	0.081678	0.0357181	0	0	0	0	0
8	2018-07-20	1899-12-31 12:00:00		16	1	0	1	1	0	0	0	0	0	0		16	65	69	46	54	100	100	100	100	100	100		16	0.970588	0.985915	0.589744	0.723117	1	1	1	1	1	1		16	0.0150379	0	0.0215062	0.0183491	0	0	0	0	0
9	2018-07-23	1899-12-31 12:00:00		19	0	0	8	10	0	0	0	0	0	0		19	65	69	38	44	100	100	100	100	100	100		19	0.970588	0.985915	0.487179	0.589206	1	1	1	1	1	1		19	0	0	0.191055	0.204794	0	0	0	0	0
10	2018-07-25	1899-12-31 12:00:00		21	0	0	4	6	0	0	0	0	0	0		21	64	69	34	38	100	100	100	100	100	100		21	0.970588	0.985915	0.435897	0.50886	1	1	1	1	1	1		21	0	0	0.111226	0.146603	0	0	0	0	0
11	2018-07-27	1899-12-31 12:00:00		23	0	0	7	5	0	0	0	0	0	0		23	64	69	27	33	100	100	100	100	100	100		23	0.970588	0.985915	0.346154	0.441905	1	1	1	1	1	1		23	0	0	0.230524	0.141079	0	0	0	0	0
12	2018-07-30	1899-12-31 12:00:00		26	0	0	6	5	0	0	0	0	0	0		26	64	69	21	28	100	100	100	100	100	100		26	0.970588	0.985915	0.269231	0.374949	1	1	1	1	1	1		26	0	0	0.251314	0.164303	0	0	0	0	0
13	2018-08-01	1899-12-31 12:00:00		28	0	1	5	5	0	0	0	0	0	0		28	63	68	16	23	100	100	100	100	100	100		28	0.970588	0.971627	0.205128	0.307994	1	1	1	1	1	1		28	0	0.0145988	0.271934	0.19671	0	0	0	0	0
14	2018-08-03	1899-12-31 12:00:00		30	0	0	6	4	0	0	0	0	0	0		30	63	68	10	19	100	100	100	100	100	100		30	0.970588	0.971627	0.128205	0.25443	1	1	1	1	1	1		30	0	0	0.470004	0.191055	0	0	0	0	0
15	2018-08-06	1899-12-31 12:00:00		33	0	1	3	6	0	0	0	0	0	0		33	62	67	0	13	100	100	100	100	100	100		33	0.970588	0.957338	0.0897436	0.174084	1	1	1	1	1	1		33	0	0.0148151	0.356675	0.37949	0	0	0	0	0
16	2018-08-08	1899-12-31 12:00:00		35	0	0	0	0	0	0	0	0	0	0		35	62	67	0	13	100	100	100	100	100	100		35	0.970588	0.957338	#DIV/0!	0.174084	1	1	1	1	1	1		35	0	0	#DIV/0!	0	0	0	0	0	0
17	2018-08-10	1899-12-31 12:00:00		37	0	0	0	2	0	0	0	0	0	0		37	62	67	0	11	100	100	100	100	100	100		37	0.970588	0.957338	#DIV/0!	0.147302	1	1	1	1	1	1		37	0	0	#DIV/0!	0.167054	0	0	0	0	0
18	2018-08-13	1899-12-31 12:00:00		40	0	0	0	0	0	0	0	0	0	0		40	61	67	0	11	100	100	100	100	100	100		40	0.970588	0.957338	#DIV/0!	0.147302	1	1	1	1	1	1		40	0	0	#DIV/0!	0	0	0	0	0	0
19	2018-08-15	1899-12-31 12:00:00		42	0	2	0	3	0	0	0	0	0	0		42	61	65	0	0	100	100	100	100	100	100		42	0.970588	0.928761	#DIV/0!	0.107128	1	1	1	1	1	1		42	0	0.0303053	#DIV/0!	0.318454	0	0	0	0	0
20	2018-08-17	1899-12-31 12:00:00		44	1	0	0	0	0	0	0	0	0	0		44	60	65	0	0	100	100	100	100	100	100		44	0.954677	0.928761	#DIV/0!	#DIV/0!	1	1	1	1	1	1		44	0.0165293	0	#DIV/0!	#DIV/0!	0	0	0	0	0
21	2018-08-20	1899-12-31 12:00:00		47	6	7	0	0	0	0	0	0	0	0		47	54	58	0	0	100	100	100	100	100	100		47	0.859209	0.828741	#DIV/0!	#DIV/0!	1	1	1	1	1	1		47	0.105361	0.113944	#DIV/0!	#DIV/0!	0	0	0	0	0
22	2018-08-22	1899-12-31 12:00:00		49	2	7	0	0	0	0	0	0	0	0		49	52	51	0	0	100	100	100	100	100	100		49	0.827387	0.72872	#DIV/0!	#DIV/0!	1	1	1	1	1	1		49	0.0377403	0.128617	#DIV/0!	#DIV/0!	0	0	0	0	0
23	2018-08-24	1899-12-31 12:00:00		51	6	0	0	0	0	0	0	0	0	0		51	46	51	0	0	100	100	100	100	100	100		51	0.731919	0.72872	#DIV/0!	#DIV/0!	1	1	1	1	1	1		51	0.122602	0	#DIV/0!	#DIV/0!	0	0	0	0	0
24	2018-08-27	1899-12-31 12:00:00		54	4	11	0	0	0	0	0	0	0	0		54	42	40	0	0	100	100	100	100	100	100		54	0.668274	0.571545	#DIV/0!	#DIV/0!	1	1	1	1	1	1		54	0.0909718	0.242946	#DIV/0!	#DIV/0!	0	0	0	0	0
25	2018-08-29	1899-12-31 12:00:00		56	4	5	0	0	0	0	0	0	0	0		56	38	35	0	0	100	100	100	100	100	100		56	0.604629	0.500102	#DIV/0!	#DIV/0!	1	1	1	1	1	1		56	0.100083	0.133531	#DIV/0!	#DIV/0!	0	0	0	0	0
26	2018-09-01	1899-12-31 12:00:00		59	4	4	0	0	0	0	0	0	0	0		59	34	31	0	0	100	100	100	100	100	100		59	0.540984	0.442948	#DIV/0!	#DIV/0!	1	1	1	1	1	1		59	0.111226	0.121361	#DIV/0!	#DIV/0!	0	0	0	0	0
27	2018-09-03	1899-12-31 12:00:00		61	7	17	0	0	0	0	0	0	0	0		61	27	14	0	0	100	100	100	100	100	100		61	0.429605	0.200041	#DIV/0!	#DIV/0!	1	1	1	1	1	1		61	0.230524	0.79493	#DIV/0!	#DIV/0!	0	0	0	0	0
28	2018-09-05	1899-12-31 12:00:00		63	0	4	0	0	0	0	0	0	0	0		63	27	10	0	0	100	100	100	100	100	100		63	0.429605	0.142886	#DIV/0!	#DIV/0!	1	1	1	1	1	1		63	0	0.336472	#DIV/0!	#DIV/0!	0	0	0	0	0
0	2018-09-07	1899-12-31 12:00:00		65	10	1	0	0	0	0	0	0	0	0		65	17	9	0	0	100	100	100	100	100	100		65	0.270492	0.128598	#DIV/0!	#DIV/0!	1	1	1	1	1	1		65	0.462624	0.105361	#DIV/0!	#DIV/0!	0	0	0	0	0
30	2018-09-10	1899-12-31 12:00:00		68	5	5	0	0	0	0	0	0	0	0		68	12	4	0	0	100	100	100	100	100	100		68	0.190935	0.0571545	#DIV/0!	#DIV/0!	1	1	1	1	1	1		68	0.348307	0.81093	#DIV/0!	#DIV/0!	0	0	0	0	0
31	2018-09-12	1899-12-31 12:00:00		70	5	2	0	0	0	0	0	0	0	0		70	7	2	0	0	100	100	100	100	100	100		70	0.111379	0.0285773	#DIV/0!	#DIV/0!	1	1	1	1	1	1		70	0.538997	0.693147	#DIV/0!	#DIV/0!	0	0	0	0	0
32	2018-09-14	1899-12-31 12:00:00		72	3	1	0	0	0	0	0	0	0	0		72	4	1	0	0	100	100	100	100	100	100		72	0.0636451	0.0142886	#DIV/0!	#DIV/0!	1	1	1	1	1	1		72	0.559616	0.693147	#DIV/0!	#DIV/0!	0	0	0	0	0
33	2018-09-17	1899-12-31 12:00:00		75	0	1	0	0	0	0	0	0	0	0		75	4	0	0	0	100	100	100	100	100	100		75	0.0636451	0	#DIV/0!	#DIV/0!	1	1	1	1	1	1		75	0	#NUM!	#DIV/0!	#DIV/0!	0	0	0	0	0
34	2018-09-19	1899-12-31 12:00:00		77	3	0	0	0	0	0	0	0	0	0		77	1	0	0	0	100	100	100	100	100	100		77	0.0159113	#DIV/0!	#DIV/0!	#DIV/0!	1	1	1	1	1	1		77	1.38629	#DIV/0!	#DIV/0!	#DIV/0!	0	0	0	0	0
35	2018-09-21	1899-12-31 12:00:00		79	1	0	0	0	0	0	0	0	0	0		79	0	0	0	0	100	100	100	100	100	100		79	0	#DIV/0!	#DIV/0!	#DIV/0!	1	1	1	1	1	1		79	#NUM!	#DIV/0!	#DIV/0!	#DIV/0!	0	0	0	0	0
36	2000-01-01	1899-12-31 12:00:00		79	0	0	0	0	0	0	0	0	0	0		79	0	0	0	0	100	100	100	100	100	100		79	#DIV/0!	#DIV/0!	#DIV/0!	#DIV/0!	1	1	1	1	1	1		79	#DIV/0!	#DIV/0!	#DIV/0!	#DIV/0!	0	0	0	0	0
37	2000-01-01	1899-12-31 12:00:00		79	0	0	0	0	0	0	0	0	0	0		79	0	0	0	0	100	100	100	100	100	100		79	#DIV/0!	#DIV/0!	#DIV/0!	#DIV/0!	1	1	1	1	1	1		79	#DIV/0!	#DIV/0!	#DIV/0!	#DIV/0!	0	0	0	0	0
38	2000-01-01	1899-12-31 12:00:00		79	0	0	0	0	0	0	0	0	0	0		79	0	0	0	0	100	100	100	100	100	100		79	#DIV/0!	#DIV/0!	#DIV/0!	#DIV/0!	1	1	1	1	1	1		79	#DIV/0!	#DIV/0!	#DIV/0!	#DIV/0!	0	0	0	0	0
39	2000-01-01	1899-12-31 12:00:00		79	0	0	0	0	0	0	0	0	0	0		79	0	0	0	0	100	100	100	100	100	100		79	#DIV/0!	#DIV/0!	#DIV/0!	#DIV/0!	1	1	1	1	1	1		79	#DIV/0!	#DIV/0!	#DIV/0!	#DIV/0!	0	0	0	0	0
40	2000-01-01	1899-12-31 12:00:00		79	0	0	0	0	0	0	0	0	0	0		79	0	0	0	0	100	100	100	100	100	100		79	#DIV/0!	#DIV/0!	#DIV/0!	#DIV/0!	1	1	1	1	1	1		79	#DIV/0!	#DIV/0!	#DIV/0!	#DIV/0!	0	0	0	0	0
41	2000-01-01	1899-12-31 12:00:00		79	0	0	0	0	0	0	0	0	0	0		79	0	0	0	0	100	100	100	100	100	100		79	#DIV/0!	#DIV/0!	#DIV/0!	#DIV/0!	1	1	1	1	1	1		79	#DIV/0!	#DIV/0!	#DIV/0!	#DIV/0!	0	0	0	0	0
42	2000-01-01	1899-12-31 12:00:00		79	0	0	0	0	0	0	0	0	0	0		79	0	0	0	0	100	100	100	100	100	100		79	#DIV/0!	#DIV/0!	#DIV/0!	#DIV/0!	1	1	1	1	1	1		79	#DIV/0!	#DIV/0!	#DIV/0!	#DIV/0!	0	0	0	0	0
43	2000-01-01	1899-12-31 12:00:00		79	0	0	0	0	0	0	0	0	0	0		79	0	0	0	0	100	100	100	100	100	100		79	#DIV/0!	#DIV/0!	#DIV/0!	#DIV/0!	1	1	1	1	1	1		79	#DIV/0!	#DIV/0!	#DIV/0!	#DIV/0!	0	0	0	0	0
44	2000-01-01	1899-12-31 12:00:00		79	0	0	0	0	0	0	0	0	0	0		79	0	0	0	0	100	100	100	100	100	100		79	#DIV/0!	#DIV/0!	#DIV/0!	#DIV/0!	1	1	1	1	1	1		79	#DIV/0!	#DIV/0!	#DIV/0!	#DIV/0!	0	0	0	0	0
45	2000-01-01	1899-12-31 12:00:00		79	0	0	0	0	0	0	0	0	0	0		79	0	0	0	0	100	100	100	100	100	100		79	#DIV/0!	#DIV/0!	#DIV/0!	#DIV/0!	1	1	1	1	1	1		79	#DIV/0!	#DIV/0!	#DIV/0!	#DIV/0!	0	0	0	0	0
46	2000-01-01	1899-12-31 12:00:00		79	0	0	0	0	0	0	0	0	0	0		79	0	0	0	0	100	100	100	100	100	100		79	#DIV/0!	#DIV/0!	#DIV/0!	#DIV/0!	1	1	1	1	1	1		79	#DIV/0!	#DIV/0!	#DIV/0!	#DIV/0!	0	0	0	0	0
47	2000-01-01	1899-12-31 12:00:00		79	0	0	0	0	0	0	0	0	0	0		79	0	0	0	0	100	100	100	100	100	100		79	#DIV/0!	#DIV/0!	#DIV/0!	#DIV/0!	1	1	1	1	1	1		79	#DIV/0!	#DIV/0!	#DIV/0!	#DIV/0!	0	0	0	0	0
48	2000-01-01	1899-12-31 12:00:00		79	0	0	0	0	0	0	0	0	0	0		79	0	0	0	0	100	100	100	100	100	100		79	#DIV/0!	#DIV/0!	#DIV/0!	#DIV/0!	1	1	1	1	1	1		79	#DIV/0!	#DIV/0!	#DIV/0!	#DIV/0!	0	0	0	0	0
49	2000-01-01	1899-12-31 12:00:00		79	0	0	0	0	0	0	0	0	0	0		79	0	0	0	0	100	100	100	100	100	100		79	#DIV/0!	#DIV/0!	#DIV/0!	#DIV/0!	1	1	1	1	1	1		79	#DIV/0!	#DIV/0!	#DIV/0!	#DIV/0!	0	0	0	0	0
50	2000-01-01	1899-12-31 12:00:00		79	0	0	0	0	0	0	0	0	0	0		79	0	0	0	0	100	100	100	100	100	100		79	#DIV/0!	#DIV/0!	#DIV/0!	#DIV/0!	1	1	1	1	1	1		79	#DIV/0!	#DIV/0!	#DIV/0!	#DIV/0!	0	0	0	0	0
51	2000-01-01	1899-12-31 12:00:00		79	0	0	0	0	0	0	0	0	0	0		79	0	0	0	0	100	100	100	100	100	100		79	#DIV/0!	#DIV/0!	#DIV/0!	#DIV/0!	1	1	1	1	1	1		79	#DIV/0!	#DIV/0!	#DIV/0!	#DIV/0!	0	0	0	0	0
52	2000-01-01	1899-12-31 12:00:00		79	0	0	0	0	0	0	0	0	0	0		79	0	0	0	0	100	100	100	100	100	100		79	#DIV/0!	#DIV/0!	#DIV/0!	#DIV/0!	1	1	1	1	1	1		79	#DIV/0!	#DIV/0!	#DIV/0!	#DIV/0!	0	0	0	0	0
53	2000-01-01	1899-12-31 12:00:00		79	0	0	0	0	0	0	0	0	0	0		79	0	0	0	0	100	100	100	100	100	100		79	#DIV/0!	#DIV/0!	#DIV/0!	#DIV/0!	1	1	1	1	1	1		79	#DIV/0!	#DIV/0!	#DIV/0!	#DIV/0!	0	0	0	0	0
54	2000-01-01	1899-12-31 12:00:00		79	0	0	0	0	0	0	0	0	0	0		79	0	0	0	0	100	100	100	100	100	100		79	#DIV/0!	#DIV/0!	#DIV/0!	#DIV/0!	1	1	1	1	1	1		79	#DIV/0!	#DIV/0!	#DIV/0!	#DIV/0!	0	0	0	0	0
55	2000-01-01	1899-12-31 12:00:00		79	0	0	0	0	0	0	0	0	0	0		79	0	0	0	0	100	100	100	100	100	100		79	#DIV/0!	#DIV/0!	#DIV/0!	#DIV/0!	1	1	1	1	1	1		79	#DIV/0!	#DIV/0!	#DIV/0!	#DIV/0!	0	0	0	0	0
56	2000-01-01	1899-12-31 12:00:00		79	0	0	0	0	0	0	0	0	0	0		79	0	0	0	0	100	100	100	100	100	100		79	#DIV/0!	#DIV/0!	#DIV/0!	#DIV/0!	1	1	1	1	1	1		79	#DIV/0!	#DIV/0!	#DIV/0!	#DIV/0!	0	0	0	0	0
57	2000-01-01	1899-12-31 12:00:00		79	0	0	0	0	0	0	0	0	0	0		79	0	0	0	0	100	100	100	100	100	100		79	#DIV/0!	#DIV/0!	#DIV/0!	#DIV/0!	1	1	1	1	1	1		79	#DIV/0!	#DIV/0!	#DIV/0!	#DIV/0!	0	0	0	0	0
58	2000-01-01	1899-12-31 12:00:00		79	0	0	0	0	0	0	0	0	0	0		79	0	0	0	0	100	100	100	100	100	100		79	#DIV/0!	#DIV/0!	#DIV/0!	#DIV/0!	1	1	1	1	1	1		79	#DIV/0!	#DIV/0!	#DIV/0!	#DIV/0!	0	0	0	0	0
59	2000-01-01	1899-12-31 12:00:00		79	0	0	0	0	0	0	0	0	0	0		79	0	0	0	0	100	100	100	100	100	100		79	#DIV/0!	#DIV/0!	#DIV/0!	#DIV/0!	1	1	1	1	1	1		79	#DIV/0!	#DIV/0!	#DIV/0!	#DIV/0!	0	0	0	0	0
60	2000-01-01	1899-12-31 12:00:00		79	0	0	0	0	0	0	0	0	0	0		79	0	0	0	0	100	100	100	100	100	100		79	#DIV/0!	#DIV/0!	#DIV/0!	#DIV/0!	1	1	1	1	1	1		79	#DIV/0!	#DIV/0!	#DIV/0!	#DIV/0!	0	0	0	0	0
61	2000-01-01	1899-12-31 12:00:00		79	0	0	0	0	0	0	0	0	0	0		79	0	0	0	0	100	100	100	100	100	100		79	#DIV/0!	#DIV/0!	#DIV/0!	#DIV/0!	1	1	1	1	1	1		79	#DIV/0!	#DIV/0!	#DIV/0!	#DIV/0!	0	0	0	0	0
62	2000-01-01	1899-12-31 12:00:00		79	0	0	0	0	0	0	0	0	0	0		79	0	0	0	0	100	100	100	100	100	100		79	#DIV/0!	#DIV/0!	#DIV/0!	#DIV/0!	1	1	1	1	1	1		79	#DIV/0!	#DIV/0!	#DIV/0!	#DIV/0!	0	0	0	0	0
63	2000-01-01	1899-12-31 12:00:00		79	0	0	0	0	0	0	0	0	0	0		79	0	0	0	0	100	100	100	100	100	100		79	#DIV/0!	#DIV/0!	#DIV/0!	#DIV/0!	1	1	1	1	1	1		79	#DIV/0!	#DIV/0!	#DIV/0!	#DIV/0!	0	0	0	0	0
64	2000-01-01	1899-12-31 12:00:00		79	0	0	0	0	0	0	0	0	0	0		79	0	0	0	0	100	100	100	100	100	100		79	#DIV/0!	#DIV/0!	#DIV/0!	#DIV/0!	1	1	1	1	1	1		79	#DIV/0!	#DIV/0!	#DIV/0!	#DIV/0!	0	0	0	0	0
65	2000-01-01	1899-12-31 12:00:00		79	0	0	0	0	0	0	0	0	0	0		79	0	0	0	0	100	100	100	100	100	100		79	#DIV/0!	#DIV/0!	#DIV/0!	#DIV/0!	1	1	1	1	1	1		79	#DIV/0!	#DIV/0!	#DIV/0!	#DIV/0!	0	0	0	0	0
66	2000-01-01	1899-12-31 12:00:00		79	0	0	0	0	0	0	0	0	0	0		79	0	0	0	0	100	100	100	100	100	100		79	#DIV/0!	#DIV/0!	#DIV/0!	#DIV/0!	1	1	1	1	1	1		79	#DIV/0!	#DIV/0!	#DIV/0!	#DIV/0!	0	0	0	0	0
67	2000-01-01	1899-12-31 12:00:00		79	0	0	0	0	0	0	0	0	0	0		79	0	0	0	0	100	100	100	100	100	100		79	#DIV/0!	#DIV/0!	#DIV/0!	#DIV/0!	1	1	1	1	1	1		79	#DIV/0!	#DIV/0!	#DIV/0!	#DIV/0!	0	0	0	0	0
68	2000-01-01	1899-12-31 12:00:00		79	0	0	0	0	0	0	0	0	0	0		79	0	0	0	0	100	100	100	100	100	100		79	#DIV/0!	#DIV/0!	#DIV/0!	#DIV/0!	1	1	1	1	1	1		79	#DIV/0!	#DIV/0!	#DIV/0!	#DIV/0!	0	0	0	0	0
69	2000-01-01	1899-12-31 12:00:00		79	0	0	0	0	0	0	0	0	0	0		79	0	0	0	0	100	100	100	100	100	100		79	#DIV/0!	#DIV/0!	#DIV/0!	#DIV/0!	1	1	1	1	1	1		79	#DIV/0!	#DIV/0!	#DIV/0!	#DIV/0!	0	0	0	0	0
70	2000-01-01	1899-12-31 12:00:00		79	0	0	0	0	0	0	0	0	0	0		79	0	0	0	0	100	100	100	100	100	100		79	#DIV/0!	#DIV/0!	#DIV/0!	#DIV/0!	1	1	1	1	1	1		79	#DIV/0!	#DIV/0!	#DIV/0!	#DIV/0!	0	0	0	0	0
71	2000-01-01	1899-12-31 12:00:00		79	0	0	0	0	0	0	0	0	0	0		79	0	0	0	0	100	100	100	100	100	100		79	#DIV/0!	#DIV/0!	#DIV/0!	#DIV/0!	1	1	1	1	1	1		79	#DIV/0!	#DIV/0!	#DIV/0!	#DIV/0!	0	0	0	0	0
72	2000-01-01	1899-12-31 12:00:00		79	0	0	0	0	0	0	0	0	0	0		79	0	0	0	0	100	100	100	100	100	100		79	#DIV/0!	#DIV/0!	#DIV/0!	#DIV/0!	1	1	1	1	1	1		79	#DIV/0!	#DIV/0!	#DIV/0!	#DIV/0!	0	0	0	0	0
73	2000-01-01	1899-12-31 12:00:00		79	0	0	0	0	0	0	0	0	0	0		79	0	0	0	0	100	100	100	100	100	100		79	#DIV/0!	#DIV/0!	#DIV/0!	#DIV/0!	1	1	1	1	1	1		79	#DIV/0!	#DIV/0!	#DIV/0!	#DIV/0!	0	0	0	0	0
74	2000-01-01	1899-12-31 12:00:00		79	0	0	0	0	0	0	0	0	0	0		79	0	0	0	0	100	100	100	100	100	100		79	#DIV/0!	#DIV/0!	#DIV/0!	#DIV/0!	1	1	1	1	1	1		79	#DIV/0!	#DIV/0!	#DIV/0!	#DIV/0!	0	0	0	0	0
75	2000-01-01	1899-12-31 12:00:00		79	0	0	0	0	0	0	0	0	0	0		79	0	0	0	0	100	100	100	100	100	100		79	#DIV/0!	#DIV/0!	#DIV/0!	#DIV/0!	1	1	1	1	1	1		79	#DIV/0!	#DIV/0!	#DIV/0!	#DIV/0!	0	0	0	0	0
				censors
				day	(G4C2)36/+ PBS RU-	(G4C2)36/+ INS RU-	(G4C2)36/+ PBS RU+	(G4C2)36 INS RU+	condition e	condition f	condition g	condition h	condition i	condition j
	2018-07-04	1899-12-31 12:00:00		0	0	0	0	0	0	0	0	0	0	0
1	2018-07-04	1899-12-31 12:00:00		0	0	0	0	0	0	0	0	0	0	0
2	2018-07-06	1899-12-31 12:00:00		2	3	1	0	1	0	0	0	0	0	0
3	2018-07-09	1899-12-31 12:00:00		5	0	0	0	0	0	0	0	0	0	0
4	2018-07-11	1899-12-31 12:00:00		7	0	0	0	0	0	0	0	0	0	0
5	2018-07-13	1899-12-31 12:00:00		9	0	1	0	1	0	0	0	0	0	0
6	2018-07-16	1899-12-31 12:00:00		12	0	0	0	1	0	0	0	0	0	0
7	2018-07-18	1899-12-31 12:00:00		14	0	0	0	0	0	0	0	0	0	0
8	2018-07-20	1899-12-31 12:00:00		16	1	0	0	0	0	0	0	0	0	0
9	2018-07-23	1899-12-31 12:00:00		19	0	0	0	0	0	0	0	0	0	0
10	2018-07-25	1899-12-31 12:00:00		21	1	0	0	0	0	0	0	0	0	0
11	2018-07-27	1899-12-31 12:00:00		23	0	0	0	0	0	0	0	0	0	0
12	2018-07-30	1899-12-31 12:00:00		26	0	0	0	0	0	0	0	0	0	0
13	2018-08-01	1899-12-31 12:00:00		28	1	0	0	0	0	0	0	0	0	0
14	2018-08-03	1899-12-31 12:00:00		30	0	0	0	0	0	0	0	0	0	0
15	2018-08-06	1899-12-31 12:00:00		33	1	0	7	0	0	0	0	0	0	0
16	2018-08-08	1899-12-31 12:00:00		35	0	0	0	0	0	0	0	0	0	0
17	2018-08-10	1899-12-31 12:00:00		37	0	0	0	0	0	0	0	0	0	0
18	2018-08-13	1899-12-31 12:00:00		40	1	0	0	0	0	0	0	0	0	0
19	2018-08-15	1899-12-31 12:00:00		42	0	0	0	8	0	0	0	0	0	0
20	2018-08-17	1899-12-31 12:00:00		44	0	0	0	0	0	0	0	0	0	0
21	2018-08-20	1899-12-31 12:00:00		47	0	0	0	0	0	0	0	0	0	0
22	2018-08-22	1899-12-31 12:00:00		49	0	0	0	0	0	0	0	0	0	0
23	2018-08-24	1899-12-31 12:00:00		51	0	0	0	0	0	0	0	0	0	0
24	2018-08-27	1899-12-31 12:00:00		54	0	0	0	0	0	0	0	0	0	0
25	2018-08-29	1899-12-31 12:00:00		56	0	0	0	0	0	0	0	0	0	0
26	2018-09-01	1899-12-31 12:00:00		59	0	0	0	0	0	0	0	0	0	0
27	2018-09-03	1899-12-31 12:00:00		61	0	0	0	0	0	0	0	0	0	0
28	2018-09-05	1899-12-31 12:00:00		63	0	0	0	0	0	0	0	0	0	0
29	2018-09-07	1899-12-31 12:00:00		65	0	0	0	0	0	0	0	0	0	0
30	2018-09-10	1899-12-31 12:00:00		68	0	0	0	0	0	0	0	0	0	0
31	2018-09-12	1899-12-31 12:00:00		70	0	0	0	0	0	0	0	0	0	0
32	2018-09-14	1899-12-31 12:00:00		72	0	0	0	0	0	0	0	0	0	0
33	2018-09-17	1899-12-31 12:00:00		75	0	0	0	0	0	0	0	0	0	0
34	2018-09-19	1899-12-31 12:00:00		77	0	0	0	0	0	0	0	0	0	0
35	2018-09-21	1899-12-31 12:00:00		79	0	0	0	0	0	0	0	0	0	0
36	2000-01-01	1899-12-31 12:00:00		79	0	0	0	0	0	0	0	0	0	0
37	2000-01-01	1899-12-31 12:00:00		79	0	0	0	0	0	0	0	0	0	0
38	2000-01-01	1899-12-31 12:00:00		79	0	0	0	0	0	0	0	0	0	0
39	2000-01-01	1899-12-31 12:00:00		79	0	0	0	0	0	0	0	0	0	0
40	2000-01-01	1899-12-31 12:00:00		79	0	0	0	0	0	0	0	0	0	0
41	2000-01-01	1899-12-31 12:00:00		79	0	0	0	0	0	0	0	0	0	0
42	2000-01-01	1899-12-31 12:00:00		79	0	0	0	0	0	0	0	0	0	0
43	2000-01-01	1899-12-31 12:00:00		79	0	0	0	0	0	0	0	0	0	0
44	2000-01-01	1899-12-31 12:00:00		79	0	0	0	0	0	0	0	0	0	0
45	2000-01-01	1899-12-31 12:00:00		79	0	0	0	0	0	0	0	0	0	0
46	2000-01-01	1899-12-31 12:00:00		79	0	0	0	0	0	0	0	0	0	0
47	2000-01-01	1899-12-31 12:00:00		79	0	0	0	0	0	0	0	0	0	0
48	2000-01-01	1899-12-31 12:00:00		79	0	0	0	0	0	0	0	0	0	0
49	2000-01-01	1899-12-31 12:00:00		79	0	0	0	0	0	0	0	0	0	0
50	2000-01-01	1899-12-31 12:00:00		79	0	0	0	0	0	0	0	0	0	0
51	2000-01-01	1899-12-31 12:00:00		79	0	0	0	0	0	0	0	0	0	0
52	2000-01-01	1899-12-31 12:00:00		79	0	0	0	0	0	0	0	0	0	0
53	2000-01-01	1899-12-31 12:00:00		79	0	0	0	0	0	0	0	0	0	0
54	2000-01-01	1899-12-31 12:00:00		79	0	0	0	0	0	0	0	0	0	0
55	2000-01-01	1899-12-31 12:00:00		79	0	0	0	0	0	0	0	0	0	0
56	2000-01-01	1899-12-31 12:00:00		79	0	0	0	0	0	0	0	0	0	0
57	2000-01-01	1899-12-31 12:00:00		79	0	0	0	0	0	0	0	0	0	0
58	2000-01-01	1899-12-31 12:00:00		79	0	0	0	0	0	0	0	0	0	0
59	2000-01-01	1899-12-31 12:00:00		79	0	0	0	0	0	0	0	0	0	0
60	2000-01-01	1899-12-31 12:00:00		79	0	0	0	0	0	0	0	0	0	0
61	2000-01-01	1899-12-31 12:00:00		79	0	0	0	0	0	0	0	0	0	0
62	2000-01-01	1899-12-31 12:00:00		79	0	0	0	0	0	0	0	0	0	0
63	2000-01-01	1899-12-31 12:00:00		79	0	0	0	0	0	0	0	0	0	0
64	2000-01-01	1899-12-31 12:00:00		79	0	0	0	0	0	0	0	0	0	0
65	2000-01-01	1899-12-31 12:00:00		79	0	0	0	0	0	0	0	0	0	0
66	2000-01-01	1899-12-31 12:00:00		79	0	0	0	0	0	0	0	0	0	0
67	2000-01-01	1899-12-31 12:00:00		79	0	0	0	0	0	0	0	0	0	0
68	2000-01-01	1899-12-31 12:00:00		79	0	0	0	0	0	0	0	0	0	0
69	2000-01-01	1899-12-31 12:00:00		79	0	0	0	0	0	0	0	0	0	0
70	2000-01-01	1899-12-31 12:00:00		79	0	0	0	0	0	0	0	0	0	0
71	2000-01-01	1899-12-31 12:00:00		79	0	0	0	0	0	0	0	0	0	0
72	2000-01-01	1899-12-31 12:00:00		79	0	0	0	0	0	0	0	0	0	0
73	2000-01-01	1899-12-31 12:00:00		79	0	0	0	0	0	0	0	0	0	0
74	2000-01-01	1899-12-31 12:00:00		79	0	0	0	0	0	0	0	0	0	0
75	2000-01-01	1899-12-31 12:00:00		79	0	0	0	0	0	0	0	0	0	0
[truncated: 84 more columns]

## Sheet: egg data
		treatment start date	2018-07-04																				total eggs laid per ave female
																								food	ave of sum egg production for ave female	error		median LS
	date on food
	time on food																							(G4C2)36/+ PBS RU-	#DIV/0!	#DIV/0!		60
	date off food																							(G4C2)36/+ INS RU-	#DIV/0!	#DIV/0!		57.5
	time off food																							(G4C2)36/+ PBS RU+	#DIV/0!	#DIV/0!		17.5
	day		-43285		-43285		-43285		-43285		-43285		-43285		-43285		-43285		-43285		-43285			(G4C2)36 INS RU+	#DIV/0!	#DIV/0!		22
	time on food (h)		0		0		0		0		0		0		0		0		0		0			condition e	#DIV/0!	#DIV/0!		0
	fraction of 24h		0		0		0		0		0		0		0		0		0		0			condition f	#DIV/0!	#DIV/0!		0
		flies in		flies in		flies in		flies in		flies in		flies in		flies in		flies in		flies in		flies in				condition g	#DIV/0!	#DIV/0!		0
(G4C2)36/+ PBS RU-		vial		vial		vial		vial		vial		vial		vial		vial		vial		vial				condition h	#DIV/0!	#DIV/0!		0
	1	#N/A		#N/A		#N/A		#N/A		#N/A		#N/A		#N/A		#N/A		#N/A		#N/A				condition i	#DIV/0!	#DIV/0!		0
	2	#N/A		#N/A		#N/A		#N/A		#N/A		#N/A		#N/A		#N/A		#N/A		#N/A				condition j	#DIV/0!	#DIV/0!		0
	3	#N/A		#N/A		#N/A		#N/A		#N/A		#N/A		#N/A		#N/A		#N/A		#N/A
	4	#N/A		#N/A		#N/A		#N/A		#N/A		#N/A		#N/A		#N/A		#N/A		#N/A
	5	#N/A		#N/A		#N/A		#N/A		#N/A		#N/A		#N/A		#N/A		#N/A		#N/A
	6	#N/A		#N/A		#N/A		#N/A		#N/A		#N/A		#N/A		#N/A		#N/A		#N/A
	7	#N/A		#N/A		#N/A		#N/A		#N/A		#N/A		#N/A		#N/A		#N/A		#N/A
	8	#N/A		#N/A		#N/A		#N/A		#N/A		#N/A		#N/A		#N/A		#N/A		#N/A
	9	#N/A		#N/A		#N/A		#N/A		#N/A		#N/A		#N/A		#N/A		#N/A		#N/A
	10	#N/A		#N/A		#N/A		#N/A		#N/A		#N/A		#N/A		#N/A		#N/A		#N/A
eggs per 24 h per female
			#DIV/0!																			sum	#DIV/0!
			#DIV/0!																				#DIV/0!
			#DIV/0!																				#DIV/0!
			#DIV/0!																				#DIV/0!
			#DIV/0!																				#DIV/0!
			#DIV/0!																				#DIV/0!
			#DIV/0!																				#DIV/0!
			#DIV/0!																				#DIV/0!
			#DIV/0!																				#DIV/0!
			#DIV/0!																				#DIV/0!
	average		#DIV/0!																			ave	#DIV/0!
	sd		#DIV/0!																			n	0
	n		0																			sd	#DIV/0!
	se		#DIV/0!																			error	#DIV/0!
(G4C2)36/+ INS RU-
	21	#N/A		#N/A		#N/A		#N/A		#N/A		#N/A		#N/A		#N/A		#N/A		#N/A
	22	#N/A		#N/A		#N/A		#N/A		#N/A		#N/A		#N/A		#N/A		#N/A		#N/A
	23	#N/A		#N/A		#N/A		#N/A		#N/A		#N/A		#N/A		#N/A		#N/A		#N/A
	24	#N/A		#N/A		#N/A		#N/A		#N/A		#N/A		#N/A		#N/A		#N/A		#N/A
	25	#N/A		#N/A		#N/A		#N/A		#N/A		#N/A		#N/A		#N/A		#N/A		#N/A
	26	#N/A		#N/A		#N/A		#N/A		#N/A		#N/A		#N/A		#N/A		#N/A		#N/A
	27	#N/A		#N/A		#N/A		#N/A		#N/A		#N/A		#N/A		#N/A		#N/A		#N/A
	28	#N/A		#N/A		#N/A		#N/A		#N/A		#N/A		#N/A		#N/A		#N/A		#N/A
	29	#N/A		#N/A		#N/A		#N/A		#N/A		#N/A		#N/A		#N/A		#N/A		#N/A
	30	#N/A		#N/A		#N/A		#N/A		#N/A		#N/A		#N/A		#N/A		#N/A		#N/A
eggs per 24 h per female
			#DIV/0!																			sum	#DIV/0!
			#DIV/0!																				#DIV/0!
			#DIV/0!																				#DIV/0!
			#DIV/0!																				#DIV/0!
			#DIV/0!																				#DIV/0!
			#DIV/0!																				#DIV/0!
			#DIV/0!																				#DIV/0!
			#DIV/0!																				#DIV/0!
			#DIV/0!																				#DIV/0!
			#DIV/0!																				#DIV/0!
	average		#DIV/0!																			ave	#DIV/0!
	sd		#DIV/0!																			n	0
	n		0																			sd	#DIV/0!
	se		#DIV/0!																			error	#DIV/0!
(G4C2)36/+ PBS RU+
	41	#N/A		#N/A		#N/A		#N/A		#N/A		#N/A		#N/A		#N/A		#N/A		#N/A
	42	#N/A		#N/A		#N/A		#N/A		#N/A		#N/A		#N/A		#N/A		#N/A		#N/A
	43	#N/A		#N/A		#N/A		#N/A		#N/A		#N/A		#N/A		#N/A		#N/A		#N/A
	44	#N/A		#N/A		#N/A		#N/A		#N/A		#N/A		#N/A		#N/A		#N/A		#N/A
	45	#N/A		#N/A		#N/A		#N/A		#N/A		#N/A		#N/A		#N/A		#N/A		#N/A
	46	#N/A		#N/A		#N/A		#N/A		#N/A		#N/A		#N/A		#N/A		#N/A		#N/A
	47	#N/A		#N/A		#N/A		#N/A		#N/A		#N/A		#N/A		#N/A		#N/A		#N/A
	48	#N/A		#N/A		#N/A		#N/A		#N/A		#N/A		#N/A		#N/A		#N/A		#N/A
	49	#N/A		#N/A		#N/A		#N/A		#N/A		#N/A		#N/A		#N/A		#N/A		#N/A
	50	#N/A		#N/A		#N/A		#N/A		#N/A		#N/A		#N/A		#N/A		#N/A		#N/A
eggs per 24 h per female
			#DIV/0!																			sum	#DIV/0!
			#DIV/0!																				#DIV/0!
			#DIV/0!																				#DIV/0!
			#DIV/0!																				#DIV/0!
			#DIV/0!																				#DIV/0!
			#DIV/0!																				#DIV/0!
			#DIV/0!																				#DIV/0!
			#DIV/0!																				#DIV/0!
			#DIV/0!																				#DIV/0!
			#DIV/0!																				#DIV/0!
	average		#DIV/0!																			ave	#DIV/0!
	sd		#DIV/0!																			n	0
	n		0																			sd	#DIV/0!
	se		#DIV/0!																			error	#DIV/0!
(G4C2)36 INS RU+
	61	#N/A		#N/A		#N/A		#N/A		#N/A		#N/A		#N/A		#N/A		#N/A		#N/A
	62	#N/A		#N/A		#N/A		#N/A		#N/A		#N/A		#N/A		#N/A		#N/A		#N/A
	63	#N/A		#N/A		#N/A		#N/A		#N/A		#N/A		#N/A		#N/A		#N/A		#N/A
	64	#N/A		#N/A		#N/A		#N/A		#N/A		#N/A		#N/A		#N/A		#N/A		#N/A
	65	#N/A		#N/A		#N/A		#N/A		#N/A		#N/A		#N/A		#N/A		#N/A		#N/A
	66	#N/A		#N/A		#N/A		#N/A		#N/A		#N/A		#N/A		#N/A		#N/A		#N/A
	67	#N/A		#N/A		#N/A		#N/A		#N/A		#N/A		#N/A		#N/A		#N/A		#N/A
	68	#N/A		#N/A		#N/A		#N/A		#N/A		#N/A		#N/A		#N/A		#N/A		#N/A
	69	#N/A		#N/A		#N/A		#N/A		#N/A		#N/A		#N/A		#N/A		#N/A		#N/A
	70	#N/A		#N/A		#N/A		#N/A		#N/A		#N/A		#N/A		#N/A		#N/A		#N/A
eggs per 24 h per female
			#DIV/0!																			sum	#DIV/0!
			#DIV/0!																				#DIV/0!
			#DIV/0!																				#DIV/0!
			#DIV/0!																				#DIV/0!
			#DIV/0!																				#DIV/0!
			#DIV/0!																				#DIV/0!
			#DIV/0!																				#DIV/0!
			#DIV/0!																				#DIV/0!
			#DIV/0!																				#DIV/0!
			#DIV/0!																				#DIV/0!
	average		#DIV/0!																			ave	#DIV/0!
	sd		#DIV/0!																			n	0
	n		0																			sd	#DIV/0!
	se		#DIV/0!																			error	#DIV/0!
condition e
	81	#N/A		#N/A		#N/A		#N/A		#N/A		#N/A		#N/A		#N/A		#N/A		#N/A
	82	#N/A		#N/A		#N/A		#N/A		#N/A		#N/A		#N/A		#N/A		#N/A		#N/A
	83	#N/A		#N/A		#N/A		#N/A		#N/A		#N/A		#N/A		#N/A		#N/A		#N/A
	84	#N/A		#N/A		#N/A		#N/A		#N/A		#N/A		#N/A		#N/A		#N/A		#N/A
	85	#N/A		#N/A		#N/A		#N/A		#N/A		#N/A		#N/A		#N/A		#N/A		#N/A
	86	#N/A		#N/A		#N/A		#N/A		#N/A		#N/A		#N/A		#N/A		#N/A		#N/A
	87	#N/A		#N/A		#N/A		#N/A		#N/A		#N/A		#N/A		#N/A		#N/A		#N/A
	88	#N/A		#N/A		#N/A		#N/A		#N/A		#N/A		#N/A		#N/A		#N/A		#N/A
	89	#N/A		#N/A		#N/A		#N/A		#N/A		#N/A		#N/A		#N/A		#N/A		#N/A
	90	#N/A		#N/A		#N/A		#N/A		#N/A		#N/A		#N/A		#N/A		#N/A		#N/A
eggs per 24 h per female
			#DIV/0!																			sum	#DIV/0!
			#DIV/0!																				#DIV/0!
			#DIV/0!																				#DIV/0!
			#DIV/0!																				#DIV/0!
			#DIV/0!																				#DIV/0!
			#DIV/0!																				#DIV/0!
			#DIV/0!																				#DIV/0!
			#DIV/0!																				#DIV/0!
			#DIV/0!																				#DIV/0!
			#DIV/0!																				#DIV/0!
	average		#DIV/0!																			ave	#DIV/0!
	sd		#DIV/0!																			n	0
	n		0																			sd	#DIV/0!
	se		#DIV/0!																			error	#DIV/0!
condition f
	101	#N/A		#N/A		#N/A		#N/A		#N/A		#N/A		#N/A		#N/A		#N/A		#N/A
	102	#N/A		#N/A		#N/A		#N/A		#N/A		#N/A		#N/A		#N/A		#N/A		#N/A
	103	#N/A		#N/A		#N/A		#N/A		#N/A		#N/A		#N/A		#N/A		#N/A		#N/A
	104	#N/A		#N/A		#N/A		#N/A		#N/A		#N/A		#N/A		#N/A		#N/A		#N/A
	105	#N/A		#N/A		#N/A		#N/A		#N/A		#N/A		#N/A		#N/A		#N/A		#N/A
	106	#N/A		#N/A		#N/A		#N/A		#N/A		#N/A		#N/A		#N/A		#N/A		#N/A
	107	#N/A		#N/A		#N/A		#N/A		#N/A		#N/A		#N/A		#N/A		#N/A		#N/A
	108	#N/A		#N/A		#N/A		#N/A		#N/A		#N/A		#N/A		#N/A		#N/A		#N/A
	109	#N/A		#N/A		#N/A		#N/A		#N/A		#N/A		#N/A		#N/A		#N/A		#N/A
	110	#N/A		#N/A		#N/A		#N/A		#N/A		#N/A		#N/A		#N/A		#N/A		#N/A
eggs per 24 h per female
			#DIV/0!																			sum	#DIV/0!
			#DIV/0!																				#DIV/0!
			#DIV/0!																				#DIV/0!
			#DIV/0!																				#DIV/0!
			#DIV/0!																				#DIV/0!
			#DIV/0!																				#DIV/0!
			#DIV/0!																				#DIV/0!
			#DIV/0!																				#DIV/0!
			#DIV/0!																				#DIV/0!
			#DIV/0!																				#DIV/0!
	average		#DIV/0!																			ave	#DIV/0!
	sd		#DIV/0!																			n	0
	n		0																			sd	#DIV/0!
	se		#DIV/0!																			error	#DIV/0!
condition g
	121	#N/A		#N/A		#N/A		#N/A		#N/A		#N/A		#N/A		#N/A		#N/A		#N/A
	122	#N/A		#N/A		#N/A		#N/A		#N/A		#N/A		#N/A		#N/A		#N/A		#N/A
	123	#N/A		#N/A		#N/A		#N/A		#N/A		#N/A		#N/A		#N/A		#N/A		#N/A
	124	#N/A		#N/A		#N/A		#N/A		#N/A		#N/A		#N/A		#N/A		#N/A		#N/A
	125	#N/A		#N/A		#N/A		#N/A		#N/A		#N/A		#N/A		#N/A		#N/A		#N/A
	126	#N/A		#N/A		#N/A		#N/A		#N/A		#N/A		#N/A		#N/A		#N/A		#N/A
	127	#N/A		#N/A		#N/A		#N/A		#N/A		#N/A		#N/A		#N/A		#N/A		#N/A
	128	#N/A		#N/A		#N/A		#N/A		#N/A		#N/A		#N/A		#N/A		#N/A		#N/A
	129	#N/A		#N/A		#N/A		#N/A		#N/A		#N/A		#N/A		#N/A		#N/A		#N/A
	130	#N/A		#N/A		#N/A		#N/A		#N/A		#N/A		#N/A		#N/A		#N/A		#N/A
eggs per 24 h per female
			#DIV/0!																			sum	#DIV/0!
			#DIV/0!																				#DIV/0!
			#DIV/0!																				#DIV/0!
			#DIV/0!																				#DIV/0!
			#DIV/0!																				#DIV/0!
			#DIV/0!																				#DIV/0!
			#DIV/0!																				#DIV/0!
			#DIV/0!																				#DIV/0!
			#DIV/0!																				#DIV/0!
			#DIV/0!																				#DIV/0!
	average		#DIV/0!																			ave	#DIV/0!
	sd		#DIV/0!																			n	0
	n		0																			sd	#DIV/0!
	se		#DIV/0!																			error	#DIV/0!
condition h
	141	#N/A		#N/A		#N/A		#N/A		#N/A		#N/A		#N/A		#N/A		#N/A		#N/A
	142	#N/A		#N/A		#N/A		#N/A		#N/A		#N/A		#N/A		#N/A		#N/A		#N/A
	143	#N/A		#N/A		#N/A		#N/A		#N/A		#N/A		#N/A		#N/A		#N/A		#N/A
	144	#N/A		#N/A		#N/A		#N/A		#N/A		#N/A		#N/A		#N/A		#N/A		#N/A
	145	#N/A		#N/A		#N/A		#N/A		#N/A		#N/A		#N/A		#N/A		#N/A		#N/A
	146	#N/A		#N/A		#N/A		#N/A		#N/A		#N/A		#N/A		#N/A		#N/A		#N/A
	147	#N/A		#N/A		#N/A		#N/A		#N/A		#N/A		#N/A		#N/A		#N/A		#N/A
	148	#N/A		#N/A		#N/A		#N/A		#N/A		#N/A		#N/A		#N/A		#N/A		#N/A
	149	#N/A		#N/A		#N/A		#N/A		#N/A		#N/A		#N/A		#N/A		#N/A		#N/A
	150	#N/A		#N/A		#N/A		#N/A		#N/A		#N/A		#N/A		#N/A		#N/A		#N/A
eggs per 24 h per female
			#DIV/0!																			sum	#DIV/0!
			#DIV/0!																				#DIV/0!
			#DIV/0!																				#DIV/0!
			#DIV/0!																				#DIV/0!
			#DIV/0!																				#DIV/0!
			#DIV/0!																				#DIV/0!
			#DIV/0!																				#DIV/0!
			#DIV/0!																				#DIV/0!
			#DIV/0!																				#DIV/0!
			#DIV/0!																				#DIV/0!
	average		#DIV/0!																			ave	#DIV/0!
	sd		#DIV/0!																			n	0
	n		0																			sd	#DIV/0!
	se		#DIV/0!																			error	#DIV/0!
condition i
	161	#N/A		#N/A		#N/A		#N/A		#N/A		#N/A		#N/A		#N/A		#N/A		#N/A
	162	#N/A		#N/A		#N/A		#N/A		#N/A		#N/A		#N/A		#N/A		#N/A		#N/A
	163	#N/A		#N/A		#N/A		#N/A		#N/A		#N/A		#N/A		#N/A		#N/A		#N/A
	164	#N/A		#N/A		#N/A		#N/A		#N/A		#N/A		#N/A		#N/A		#N/A		#N/A
	165	#N/A		#N/A		#N/A		#N/A		#N/A		#N/A		#N/A		#N/A		#N/A		#N/A
	166	#N/A		#N/A		#N/A		#N/A		#N/A		#N/A		#N/A		#N/A		#N/A		#N/A
	167	#N/A		#N/A		#N/A		#N/A		#N/A		#N/A		#N/A		#N/A		#N/A		#N/A
	168	#N/A		#N/A		#N/A		#N/A		#N/A		#N/A		#N/A		#N/A		#N/A		#N/A
	169	#N/A		#N/A		#N/A		#N/A		#N/A		#N/A		#N/A		#N/A		#N/A		#N/A
	170	#N/A		#N/A		#N/A		#N/A		#N/A		#N/A		#N/A		#N/A		#N/A		#N/A
eggs per 24 h per female
			#DIV/0!																			sum	#DIV/0!
			#DIV/0!																				#DIV/0!
			#DIV/0!																				#DIV/0!
			#DIV/0!																				#DIV/0!
			#DIV/0!																				#DIV/0!
			#DIV/0!																				#DIV/0!
			#DIV/0!																				#DIV/0!
			#DIV/0!																				#DIV/0!
			#DIV/0!																				#DIV/0!
			#DIV/0!																				#DIV/0!
	average		#DIV/0!																			ave	#DIV/0!
	sd		#DIV/0!																			n	0
	n		0																			sd	#DIV/0!
	se		#DIV/0!																			error	#DIV/0!
condition j
	181	#N/A		#N/A		#N/A		#N/A		#N/A		#N/A		#N/A		#N/A		#N/A		#N/A
	182	#N/A		#N/A		#N/A		#N/A		#N/A		#N/A		#N/A		#N/A		#N/A		#N/A
	183	#N/A		#N/A		#N/A		#N/A		#N/A		#N/A		#N/A		#N/A		#N/A		#N/A
	184	#N/A		#N/A		#N/A		#N/A		#N/A		#N/A		#N/A		#N/A		#N/A		#N/A
	185	#N/A		#N/A		#N/A		#N/A		#N/A		#N/A		#N/A		#N/A		#N/A		#N/A
	186	#N/A		#N/A		#N/A		#N/A		#N/A		#N/A		#N/A		#N/A		#N/A		#N/A
	187	#N/A		#N/A		#N/A		#N/A		#N/A		#N/A		#N/A		#N/A		#N/A		#N/A
	188	#N/A		#N/A		#N/A		#N/A		#N/A		#N/A		#N/A		#N/A		#N/A		#N/A
	189	#N/A		#N/A		#N/A		#N/A		#N/A		#N/A		#N/A		#N/A		#N/A		#N/A
	190	#N/A		#N/A		#N/A		#N/A		#N/A		#N/A		#N/A		#N/A		#N/A		#N/A
eggs per 24 h per female
			#DIV/0!																			sum	#DIV/0!
			#DIV/0!																				#DIV/0!
			#DIV/0!																				#DIV/0!
			#DIV/0!																				#DIV/0!
			#DIV/0!																				#DIV/0!
			#DIV/0!																				#DIV/0!
			#DIV/0!																				#DIV/0!
			#DIV/0!																				#DIV/0!
			#DIV/0!																				#DIV/0!
			#DIV/0!																				#DIV/0!
	average		#DIV/0!																			ave	#DIV/0!
	sd		#DIV/0!																			n	0
	n		0																			sd	#DIV/0!
	se		#DIV/0!																			error	#DIV/0!

## Sheet: popn per bottle
EXPERIMENT	(G4C2)/+ insulin injection 0.03 mg/ml
CONDITION	(G4C2)36/+ PBS RU-						sum deaths		63			censored		8								CONDITION	condition f						sum deaths		0			censored		0
	1	2	3	4	5	6	7	8	9	10	11	12	13	14	15	16	17	18	19	20			101	102	103	104	105	106	107	108	109	110	111	112	113	114	115	116	117	118	119	120
dead	14	13	8	13	15	0	0	0	0	0	0	0	0	0	0	0	0	0	0	0		dead	0	0	0	0	0	0	0	0	0	0	0	0	0	0	0	0	0	0	0	0
censored	1	1	4	2	0	0	0	0	0	0	0	0	0	0	0	0	0	0	0	0		censored	0	0	0	0	0	0	0	0	0	0	0	0	0	0	0	0	0	0	0	0
remaining per bottle	0	1	3	0	0	15	15	15	15	15	15	15	15	15	15	15	15	15	15	15		remaining per bottle	10	10	10	10	10	10	10	10	10	10	10	10	10	10	10	10	10	10	10	10
CONDITION	(G4C2)36/+ INS RU-						sum deaths		70			censored		2								CONDITION	condition g						sum deaths		0			censored		0
	21	22	23	24	25	26	27	28	29	30	31	32	33	34	35	36	37	38	39	40			121	122	123	124	125	126	127	128	129	130	131	132	133	134	135	136	137	138	139	140
dead	17	14	13	13	13	0	0	0	0	0	0	0	0	0	0	0	0	0	0	0		dead	0	0	0	0	0	0	0	0	0	0	0	0	0	0	0	0	0	0	0	0
censored	0	0	1	1	0	0	0	0	0	0	0	0	0	0	0	0	0	0	0	0		censored	0	0	0	0	0	0	0	0	0	0	0	0	0	0	0	0	0	0	0	0
remaining per bottle	-2	1	1	1	2	15	15	15	15	15	15	15	15	15	15	15	15	15	15	15		remaining per bottle	10	10	10	10	10	10	10	10	10	10	10	10	10	10	10	10	10	10	10	10
CONDITION	(G4C2)36/+ PBS RU+						sum deaths		71			censored		7								CONDITION	condition h						sum deaths		0			censored		0
	41	42	43	44	45	46	47	48	49	50	51	52	53	54	55	56	57	58	59	60			141	142	143	144	145	146	147	148	149	150	151	152	153	154	155	156	157	158	159	160
dead	12	12	12	10	21	4	0	0	0	0	0	0	0	0	0	0	0	0	0	0		dead	0	0	0	0	0	0	0	0	0	0	0	0	0	0	0	0	0	0	0	0
censored	0	0	0	7	0	0	0	0	0	0	0	0	0	0	0	0	0	0	0	0		censored	0	0	0	0	0	0	0	0	0	0	0	0	0	0	0	0	0	0	0	0
remaining per bottle	3	3	3	-2	-6	11	15	15	15	15	15	15	15	15	15	15	15	15	15	15		remaining per bottle	10	10	10	10	10	10	10	10	10	10	10	10	10	10	10	10	10	10	10	10
CONDITION	(G4C2)36 INS RU+						sum deaths		67			censored		11								CONDITION	condition i						sum deaths		0			censored		0
	61	62	63	64	65	66	67	68	69	70	71	72	73	74	75	76	77	78	79	80			161	162	163	164	165	166	167	168	169	170	171	172	173	174	175	176	177	178	179	180
dead	12	12	15	13	15	0	0	0	0	0	0	0	0	0	0	0	0	0	0	0		dead	0	0	0	0	0	0	0	0	0	0	0	0	0	0	0	0	0	0	0	0
censored	1	9	0	0	1	0	0	0	0	0	0	0	0	0	0	0	0	0	0	0		censored	0	0	0	0	0	0	0	0	0	0	0	0	0	0	0	0	0	0	0	0
remaining per bottle	2	-6	0	2	-1	15	15	15	15	15	15	15	15	15	15	15	15	15	15	15		remaining per bottle	10	10	10	10	10	10	10	10	10	10	10	10	10	10	10	10	10	10	10	10
CONDITION	condition e						sum deaths		0			censored		0								CONDITION	condition j						sum deaths		0			censored		0
	81	82	83	84	85	86	87	88	89	90	91	92	93	94	95	96	97	98	99	100			181	182	183	184	185	186	187	188	189	190	191	192	193	194	195	196	197	198	199	200
dead	0	0	0	0	0	0	0	0	0	0	0	0	0	0	0	0	0	0	0	0		dead	0	0	0	0	0	0	0	0	0	0	0	0	0	0	0	0	0	0	0	0
censored	0	0	0	0	0	0	0	0	0	0	0	0	0	0	0	0	0	0	0	0		censored	0	0	0	0	0	0	0	0	0	0	0	0	0	0	0	0	0	0	0	0
remaining per bottle	10	10	10	10	10	10	10	10	10	10	10	10	10	10	10	10	10	10	10	10		remaining per bottle	10	10	10	10	10	10	10	10	10	10	10	10	10	10	10	10	10	10	10	10

## Sheet: sheet(1)
EXPERIMENT	(G4C2)/+ insulin injection 0.03 mg/ml	insulin
DAY	0
DATE	2018-07-04						time		1899-12-31 12:00:00			food date
CONDITION	(G4C2)36/+ PBS RU-						sum deaths		0			censored		0								CONDITION	condition f						sum deaths		0			censored		0
	1	2	3	4	5	6	7	8	9	10	11	12	13	14	15	16	17	18	19	20			101	102	103	104	105	106	107	108	109	110	111	112	113	114	115	116	117	118	119	120
dead																						dead
carried over																						carried over
censored																						censored
CONDITION	(G4C2)36/+ INS RU-						sum deaths		0			censored		0								CONDITION	condition g						sum deaths		0			censored		0
	21	22	23	24	25	26	27	28	29	30	31	32	33	34	35	36	37	38	39	40			121	122	123	124	125	126	127	128	129	130	131	132	133	134	135	136	137	138	139	140
dead																						dead
carried over																						carried over
censored																						censored
CONDITION	(G4C2)36/+ PBS RU+						sum deaths		0			censored		0								CONDITION	condition h						sum deaths		0			censored		0
	41	42	43	44	45	46	47	48	49	50	51	52	53	54	55	56	57	58	59	60			141	142	143	144	145	146	147	148	149	150	151	152	153	154	155	156	157	158	159	160
dead																						dead
carried over																						carried over
censored																						censored
CONDITION	(G4C2)36 INS RU+						sum deaths		0			censored		0								CONDITION	condition i						sum deaths		0			censored		0
	61	62	63	64	65	66	67	68	69	70	71	72	73	74	75	76	77	78	79	80			161	162	163	164	165	166	167	168	169	170	171	172	173	174	175	176	177	178	179	180
dead																						dead
carried over																						carried over
censored																						censored
CONDITION	condition e						sum deaths		0			censored		0								CONDITION	condition j						sum deaths		0			censored		0
	81	82	83	84	85	86	87	88	89	90	91	92	93	94	95	96	97	98	99	100			181	182	183	184	185	186	187	188	189	190	191	192	193	194	195	196	197	198	199	200
dead																						dead
carried over																						carried over
censored																						censored

[truncated: 74 more sheets: sheet(2), sheet(3), sheet(4), sheet(5), sheet(6), sheet(7), sheet(8), sheet(9), sheet(10), sheet(11), sheet(12), sheet(13), sheet (14), sheet (15), sheet (16), sheet (17), sheet (18), sheet (19), sheet (20), sheet (21) …]
