# Supplementary material for: Enhanced insulin signalling ameliorates C9orf72 hexanucleotide repeat expansion toxicity in Drosophila
Source: eLife journal article supplement (doi:10.7554/elife.58565), 2021-03-19
Supplement: supp [file elife-58565-supp-v1.zip › elife_poa_e58565_Figure_6_source_data_1.xls]

## Sheet: summary
experiment	expt name here			start	2018-11-19
notes				day	date	day	date	day	date	day	date
				1	2018-11-20	26	2018-12-15	51	2019-01-09	76	2019-02-03
				2	2018-11-21	27	2018-12-16	52	2019-01-10	77	2019-02-04
				3	2018-11-22	28	2018-12-17	53	2019-01-11	78	2019-02-05
				4	2018-11-23	29	2018-12-18	54	2019-01-12	79	2019-02-06
				5	2018-11-24	30	2018-12-19	55	2019-01-13	80	2019-02-07
				6	2018-11-25	31	2018-12-20	56	2019-01-14	81	2019-02-08
				7	2018-11-26	32	2018-12-21	57	2019-01-15	82	2019-02-09
				8	2018-11-27	33	2018-12-22	58	2019-01-16	83	2019-02-10
				9	2018-11-28	34	2018-12-23	59	2019-01-17	84	2019-02-11
				10	2018-11-29	35	2018-12-24	60	2019-01-18	85	2019-02-12
				11	2018-11-30	36	2018-12-25	61	2019-01-19	86	2019-02-13
				12	2018-12-01	37	2018-12-26	62	2019-01-20	87	2019-02-14
				13	2018-12-02	38	2018-12-27	63	2019-01-21	88	2019-02-15
				14	2018-12-03	39	2018-12-28	64	2019-01-22	89	2019-02-16
				15	2018-12-04	40	2018-12-29	65	2019-01-23	90	2019-02-17
				16	2018-12-05	41	2018-12-30	66	2019-01-24	91	2019-02-18
				17	2018-12-06	42	2018-12-31	67	2019-01-25	92	2019-02-19
				18	2018-12-07	43	2019-01-01	68	2019-01-26	93	2019-02-20
				19	2018-12-08	44	2019-01-02	69	2019-01-27	94	2019-02-21
				20	2018-12-09	45	2019-01-03	70	2019-01-28	95	2019-02-22
				21	2018-12-10	46	2019-01-04	71	2019-01-29	96	2019-02-23
				22	2018-12-11	47	2019-01-05	72	2019-01-30	97	2019-02-24
				23	2018-12-12	48	2019-01-06	73	2019-01-31	98	2019-02-25
				24	2018-12-13	49	2019-01-07	74	2019-02-01	99	2019-02-26
				25	2018-12-14	50	2019-01-08	75	2019-02-02	100	2019-02-27
	1	2	3	4	5	6	7	8	9	10
condition	Insulin, uninduced	test1	PBS, uninduced	PBS, Induced	Insulin, Induced	test 2	condition g	condition h	condition i	condition j
container	vials	vials	vials	vials	vials	vials	vials	vials	vials	vials
flies per container	15	15	15	15	15	15	10	10	10	10
# containers	7	7	8	8	8	7	10	10	10	10
calculated start #	105	105	120	120	120	105	100	100	100	100
total deaths	106	108	112	121	116	96	0	0	0	0
total censors	2	0	3	5	2	4	0	0	0	0
actual start #	108	108	115	126	118	100	0	0	0	0
condition	Insulin, uninduced	test1	PBS, uninduced	PBS, Induced	Insulin, Induced	test 2	condition g	condition h	condition i	condition j	condition
gender	female	female	female	female	female	female	female	female	female	female	gender
mating status	mated 48h	mated 48h	mated 48h	mated 48h	mated 48h	mated 48h	mated 48h	mated 48h	mated 48h	mated 48h	mating status
Wolbachia infected	Yes	Yes	Yes	Yes	Yes	Yes	Yes	Yes	Yes	Yes	Wolbachia infected
temperature	25 C	25 C	25 C	25 C	25 C	25 C	25 C	25 C	25 C	25 C	temperature
base food	1 SY	1 SY	1 SY	1 SY	1 SY	1 SY	1 SY	1 SY	1 SY	1 SY	base food
yeast batch											yeast batch
food addition											food addition
other envir. descriptor 1											other envir. descriptor 1
other envir. descriptor 2											other envir. descriptor 2
other envir. descriptor 3											other envir. descriptor 3
background / strain	Dahomey	Dahomey	Dahomey	Dahomey	Dahomey	Dahomey	Dahomey	Dahomey	Dahomey	Dahomey	background / strain
genetic alteration 1											genetic alteration 1
genetic alteration 2											genetic alteration 2
genetic alteration 3											genetic alteration 3

## Sheet: stats
expt name here				note: values will only be accurate at the end of the experiment
chi-squared values
		Insulin, uninduced	test1	PBS, uninduced	PBS, Induced	Insulin, Induced	test 2	condition g	condition h	condition i	condition j
	Insulin, uninduced		0.591113	7.03833	230.461	217.487	69.9316	#DIV/0!	#DIV/0!	#DIV/0!	#DIV/0!
	test1			4.08387	231.694	215.595	62.7869	#DIV/0!	#DIV/0!	#DIV/0!	#DIV/0!
	PBS, uninduced				248.112	237.343	98.7056	#DIV/0!	#DIV/0!	#DIV/0!	#DIV/0!
	PBS, Induced					12.8174	158.373	#DIV/0!	#DIV/0!	#DIV/0!	#DIV/0!
	Insulin, Induced						125.064	#DIV/0!	#DIV/0!	#DIV/0!	#DIV/0!
	test 2							#DIV/0!	#DIV/0!	#DIV/0!	#DIV/0!
	condition g								#DIV/0!	#DIV/0!	#DIV/0!
	condition h									#DIV/0!	#DIV/0!
	condition i										#DIV/0!
	condition j
chi-squared p-value for log-rank test on survivorship data
		Insulin, uninduced	test1	PBS, uninduced	PBS, Induced	Insulin, Induced	test 2	condition g	condition h	condition i	condition j
	median (d)	71	71	71	19.5	24	57	0	0	0	0
	mean (d)	70.7715	69.9815	73.8174	22.4628	27.245	55.5841	0	0	0	0
	maximum (d)	80	82.5	89.5	33.5	39.5	73	0	0	0	0
	Insulin, uninduced		0.441989	0.00797834	4.72873e-52	3.19576e-49	6.13957e-17	#DIV/0!	#DIV/0!	#DIV/0!	#DIV/0!
	test1			0.0432943	2.5464e-52	8.26754e-49	2.30329e-15	#DIV/0!	#DIV/0!	#DIV/0!	#DIV/0!
	PBS, uninduced				6.69797e-56	1.49283e-53	2.9297e-23	#DIV/0!	#DIV/0!	#DIV/0!	#DIV/0!
	PBS, Induced					0.000343412	2.56586e-36	#DIV/0!	#DIV/0!	#DIV/0!	#DIV/0!
	Insulin, Induced						4.92812e-29	#DIV/0!	#DIV/0!	#DIV/0!	#DIV/0!
	test 2							#DIV/0!	#DIV/0!	#DIV/0!	#DIV/0!
	condition g								#DIV/0!	#DIV/0!	#DIV/0!
	condition h									#DIV/0!	#DIV/0!
	condition i										#DIV/0!
	condition j

## Sheet: cumulative dths per bottle
			deaths
				bottle number
	date	time	day	1	2	3	4	5	6	7	8	9	10	11	12	13	14	15	16	17	18	19	20	21	22	23	24	25	26	27	28	29	30	31	32	33	34	35	36	37	38	39	40	41	42	43	44	45	46
	2018-11-19	1899-12-31 12:00:00		16	14	19	14	13	16	16	0	0	0	0	0	0	0	0	0	0	0	0	0	20	12	16	15	15	15	15	0	0	0	0	0	0	0	0	0	0	0	0	0	14	15	15	17	16	13
1	2018-11-22	1899-12-31 12:00:00	3	0	0	0	0	0	0	0	0	0	0	0	0	0	0	0	0	0	0	0	0	0	0	0	0	0	0	0	0	0	0	0	0	0	0	0	0	0	0	0	0	0	0	0	0	0	0
2	2018-11-26	1899-12-31 12:00:00	7	0	0	0	0	0	0	0	0	0	0	0	0	0	0	0	0	0	0	0	0	0	0	0	0	0	0	0	0	0	0	0	0	0	0	0	0	0	0	0	0	0	0	0	0	0	0
3	2018-11-28	1899-12-31 12:00:00	9	0	0	0	0	0	0	0	0	0	0	0	0	0	0	0	0	0	0	0	0	0	0	0	0	0	0	0	0	0	0	0	0	0	0	0	0	0	0	0	0	0	0	0	0	0	0
4	2018-11-30	1899-12-31 12:00:00	11	0	0	0	0	0	0	0	0	0	0	0	0	0	0	0	0	0	0	0	0	0	0	0	0	0	0	0	0	0	0	0	0	0	0	0	0	0	0	0	0	0	0	0	0	0	0
5	2018-12-02	1899-12-31 12:00:00	13	0	0	0	0	0	0	0	0	0	0	0	0	0	0	0	0	0	0	0	0	0	0	0	0	0	0	0	0	0	0	0	0	0	0	0	0	0	0	0	0	0	0	0	0	0	0
6	2018-12-03	1899-12-31 12:00:00	14	0	0	0	0	0	0	0	0	0	0	0	0	0	0	0	0	0	0	0	0	0	0	0	0	0	0	0	0	0	0	0	0	0	0	0	0	0	0	0	0	0	0	0	0	0	0
7	2018-12-04	1899-12-31 12:00:00	15	0	0	0	0	0	0	0	0	0	0	0	0	0	0	0	0	0	0	0	0	0	0	0	0	0	0	0	0	0	0	0	0	0	0	0	0	0	0	0	0	0	0	0	0	0	0
8	2018-12-05	1899-12-31 12:00:00	16	0	0	0	0	0	0	0	0	0	0	0	0	0	0	0	0	0	0	0	0	0	0	0	0	0	0	0	0	0	0	0	0	0	0	0	0	0	0	0	0	0	0	0	0	0	0
9	2018-12-07	1899-12-31 12:00:00	18	0	0	0	0	0	0	0	0	0	0	0	0	0	0	0	0	0	0	0	0	0	0	0	0	0	0	0	0	0	0	0	0	0	0	0	0	0	0	0	0	0	0	0	0	0	0
10	2018-12-10	1899-12-31 12:00:00	21	0	0	0	0	0	0	0	0	0	0	0	0	0	0	0	0	0	0	0	0	0	0	0	0	0	0	0	0	0	0	0	0	0	0	0	0	0	0	0	0	0	0	0	0	0	0
11	2018-12-12	1899-12-31 12:00:00	23	0	0	0	0	0	0	0	0	0	0	0	0	0	0	0	0	0	0	0	0	0	0	0	0	0	0	0	0	0	0	0	0	0	0	0	0	0	0	0	0	0	0	0	0	0	0
12	2018-12-14	1899-12-31 12:00:00	25	0	0	0	0	0	0	0	0	0	0	0	0	0	0	0	0	0	0	0	0	0	0	0	0	0	0	0	0	0	0	0	0	0	0	0	0	0	0	0	0	0	0	0	0	0	0
13	2018-12-17	1899-12-31 12:00:00	28	0	0	0	0	0	0	0	0	0	0	0	0	0	0	0	0	0	0	0	0	0	0	0	0	0	0	0	0	0	0	0	0	0	0	0	0	0	0	0	0	0	0	0	0	0	0
14	2018-12-19	1899-12-31 12:00:00	30	0	0	0	0	0	0	0	0	0	0	0	0	0	0	0	0	0	0	0	0	0	0	0	0	0	0	0	0	0	0	0	0	0	0	0	0	0	0	0	0	0	0	0	0	0	0
15	2018-12-21	1899-12-31 12:00:00	32	0	0	0	0	1	0	0	0	0	0	0	0	0	0	0	0	0	0	0	0	0	0	0	0	0	0	0	0	0	0	0	0	0	0	0	0	0	0	0	0	0	0	0	0	0	0
16	2018-12-24	1899-12-31 12:00:00	35	0	0	0	0	1	0	0	0	0	0	0	0	0	0	0	0	0	0	0	0	0	0	0	1	0	1	0	0	0	0	0	0	0	0	0	0	0	0	0	0	1	0	0	0	0	0
17	2018-12-27	1899-12-31 12:00:00	38	0	0	0	0	0	0	0	0	0	0	0	0	0	0	0	0	0	0	0	0	0	0	0	0	0	0	0	0	0	0	0	0	0	0	0	0	0	0	0	0	0	0	0	0	0	0
18	2018-12-30	1899-12-31 12:00:00	41	0	0	0	0	0	0	0	0	0	0	0	0	0	0	0	0	0	0	0	0	0	0	0	0	0	0	0	0	0	0	0	0	0	0	0	0	0	0	0	0	1	0	0	0	0	0
19	2019-01-01	1899-12-31 12:00:00	43	0	0	0	0	0	0	0	0	0	0	0	0	0	0	0	0	0	0	0	0	0	0	0	0	0	0	0	0	0	0	0	0	0	0	0	0	0	0	0	0	0	0	0	0	0	0
20	2019-01-04	1899-12-31 12:00:00	46	0	0	0	0	0	0	0	0	0	0	0	0	0	0	0	0	0	0	0	0	0	0	0	0	0	1	2	0	0	0	0	0	0	0	0	0	0	0	0	0	0	0	0	0	0	0
21	2019-01-07	1899-12-31 12:00:00	49	0	0	0	0	0	0	1	0	0	0	0	0	0	0	0	0	0	0	0	0	1	0	0	1	0	0	1	0	0	0	0	0	0	0	0	0	0	0	0	0	0	0	0	0	0	0
22	2019-01-09	1899-12-31 12:00:00	51	0	0	0	0	0	0	0	0	0	0	0	0	0	0	0	0	0	0	0	0	0	1	0	0	0	0	2	0	0	0	0	0	0	0	0	0	0	0	0	0	0	0	0	0	0	0
23	2019-01-11	1899-12-31 12:00:00	53	0	0	0	1	0	1	0	0	0	0	0	0	0	0	0	0	0	0	0	0	0	0	0	0	0	0	2	0	0	0	0	0	0	0	0	0	0	0	0	0	0	1	0	0	0	0
24	2019-01-14	1899-12-31 12:00:00	56	0	0	1	1	0	0	0	0	0	0	0	0	0	0	0	0	0	0	0	0	0	3	0	0	0	1	2	0	0	0	0	0	0	0	0	0	0	0	0	0	0	0	0	0	2	1
25	2019-01-16	1899-12-31 12:00:00	58	1	0	0	1	1	1	0	0	0	0	0	0	0	0	0	0	0	0	0	0	0	0	0	0	0	0	2	0	0	0	0	0	0	0	0	0	0	0	0	0	0	0	0	0	0	0
26	2019-01-18	1899-12-31 12:00:00	60	1	0	1	1	1	0	0	0	0	0	0	0	0	0	0	0	0	0	0	0	0	0	0	1	0	0	1	0	0	0	0	0	0	0	0	0	0	0	0	0	2	0	0	0	0	0
27	2019-01-21	1899-12-31 12:00:00	63	0	1	2	3	1	0	0	0	0	0	0	0	0	0	0	0	0	0	0	0	1	2	1	0	0	2	2	0	0	0	0	0	0	0	0	0	0	0	0	0	1	0	0	0	0	1
28	2019-01-23	1899-12-31 12:00:00	65	0	1	5	2	0	2	0	0	0	0	0	0	0	0	0	0	0	0	0	0	2	0	2	1	1	3	0	0	0	0	0	0	0	0	0	0	0	0	0	0	1	2	0	0	1	2
29	2019-01-25	1899-12-31 12:00:00	67	1	1	0	1	1	0	0	0	0	0	0	0	0	0	0	0	0	0	0	0	1	0	0	0	1	1	0	0	0	0	0	0	0	0	0	0	0	0	0	0	1	0	2	1	0	0
30	2019-01-28	1899-12-31 12:00:00	70	0	3	3	1	3	2	1	0	0	0	0	0	0	0	0	0	0	0	0	0	1	2	0	2	1	2	0	0	0	0	0	0	0	0	0	0	0	0	0	0	2	4	3	0	5	5
31	2019-01-30	1899-12-31 12:00:00	72	3	1	0	1	0	3	1	0	0	0	0	0	0	0	0	0	0	0	0	0	0	0	3	0	1	0	0	0	0	0	0	0	0	0	0	0	0	0	0	0	0	1	2	1	2	2
32	2019-02-01	1899-12-31 12:00:00	74	1	3	2	1	0	3	1	0	0	0	0	0	0	0	0	0	0	0	0	0	2	1	2	2	1	0	0	0	0	0	0	0	0	0	0	0	0	0	0	0	0	1	1	0	0	0
33	2019-02-04	1899-12-31 12:00:00	77	3	2	4	1	0	1	6	0	0	0	0	0	0	0	0	0	0	0	0	0	4	2	3	2	2	3	0	0	0	0	0	0	0	0	0	0	0	0	0	0	4	1	2	2	2	1
34	2019-02-06	1899-12-31 12:00:00	79	0	0	0	0	0	0	2	0	0	0	0	0	0	0	0	0	0	0	0	0	0	0	1	1	1	1	0	0	0	0	0	0	0	0	0	0	0	0	0	0	0	0	1	0	1	1
35	2019-02-08	1899-12-31 12:00:00	81	3	1	0	0	2	2	2	0	0	0	0	0	0	0	0	0	0	0	0	0	3	0	0	2	3	0	0	0	0	0	0	0	0	0	0	0	0	0	0	0	0	3	1	3	0	0
36	2019-02-11	1899-12-31 12:00:00	84	1	1	0	0	0	1	1	0	0	0	0	0	0	0	0	0	0	0	0	0	4	1	3	1	3	0	1	0	0	0	0	0	0	0	0	0	0	0	0	0	0	0	1	2	1	0
37	2019-02-13	1899-12-31 12:00:00	86	1	0	0	0	1	0	1	0	0	0	0	0	0	0	0	0	0	0	0	0	0	0	1	1	0	0	0	0	0	0	0	0	0	0	0	0	0	0	0	0	0	0	1	1	0	0
38	2019-02-15	1899-12-31 12:00:00	88	0	0	0	0	0	0	0	0	0	0	0	0	0	0	0	0	0	0	0	0	0	0	0	0	0	0	0	0	0	0	0	0	0	0	0	0	0	0	0	0	1	2	0	1	0	0
39	2019-02-18	1899-12-31 12:00:00	91	1	0	0	0	0	0	0	0	0	0	0	0	0	0	0	0	0	0	0	0	1	0	0	0	1	0	0	0	0	0	0	0	0	0	0	0	0	0	0	0	0	0	1	2	0	0
40	2019-02-20	1899-12-31 12:00:00	93	0	0	0	0	0	0	0	0	0	0	0	0	0	0	0	0	0	0	0	0	0	0	0	0	0	0	0	0	0	0	0	0	0	0	0	0	0	0	0	0	0	0	0	1	0	0
41	2000-02-22	1899-12-31 12:00:00	93	0	0	0	0	0	0	0	0	0	0	0	0	0	0	0	0	0	0	0	0	0	0	0	0	0	0	0	0	0	0	0	0	0	0	0	0	0	0	0	0	0	0	0	3	0	0
42	2000-01-01	1899-12-31 12:00:00	93	0	0	0	0	0	0	0	0	0	0	0	0	0	0	0	0	0	0	0	0	0	0	0	0	0	0	0	0	0	0	0	0	0	0	0	0	0	0	0	0	0	0	0	0	0	0
43	2000-01-01	1899-12-31 12:00:00	93	0	0	0	0	0	0	0	0	0	0	0	0	0	0	0	0	0	0	0	0	0	0	0	0	0	0	0	0	0	0	0	0	0	0	0	0	0	0	0	0	0	0	0	0	0	0
44	2000-01-01	1899-12-31 12:00:00	93	0	0	0	0	0	0	0	0	0	0	0	0	0	0	0	0	0	0	0	0	0	0	0	0	0	0	0	0	0	0	0	0	0	0	0	0	0	0	0	0	0	0	0	0	0	0
45	2000-01-01	1899-12-31 12:00:00	93	0	0	0	0	0	0	0	0	0	0	0	0	0	0	0	0	0	0	0	0	0	0	0	0	0	0	0	0	0	0	0	0	0	0	0	0	0	0	0	0	0	0	0	0	0	0
46	2000-01-01	1899-12-31 12:00:00	93	0	0	0	0	0	0	0	0	0	0	0	0	0	0	0	0	0	0	0	0	0	0	0	0	0	0	0	0	0	0	0	0	0	0	0	0	0	0	0	0	0	0	0	0	0	0
47	2000-01-01	1899-12-31 12:00:00	93	0	0	0	0	0	0	0	0	0	0	0	0	0	0	0	0	0	0	0	0	0	0	0	0	0	0	0	0	0	0	0	0	0	0	0	0	0	0	0	0	0	0	0	0	0	0
48	2000-01-01	1899-12-31 12:00:00	93	0	0	0	0	0	0	0	0	0	0	0	0	0	0	0	0	0	0	0	0	0	0	0	0	0	0	0	0	0	0	0	0	0	0	0	0	0	0	0	0	0	0	0	0	0	0
49	2000-01-01	1899-12-31 12:00:00	93	0	0	0	0	0	0	0	0	0	0	0	0	0	0	0	0	0	0	0	0	0	0	0	0	0	0	0	0	0	0	0	0	0	0	0	0	0	0	0	0	0	0	0	0	0	0
50	2000-01-01	1899-12-31 12:00:00	93	0	0	0	0	0	0	0	0	0	0	0	0	0	0	0	0	0	0	0	0	0	0	0	0	0	0	0	0	0	0	0	0	0	0	0	0	0	0	0	0	0	0	0	0	0	0
51	2000-01-01	1899-12-31 12:00:00	93	0	0	0	0	0	0	0	0	0	0	0	0	0	0	0	0	0	0	0	0	0	0	0	0	0	0	0	0	0	0	0	0	0	0	0	0	0	0	0	0	0	0	0	0	0	0
52	2000-01-01	1899-12-31 12:00:00	93	0	0	0	0	0	0	0	0	0	0	0	0	0	0	0	0	0	0	0	0	0	0	0	0	0	0	0	0	0	0	0	0	0	0	0	0	0	0	0	0	0	0	0	0	0	0
53	2000-01-01	1899-12-31 12:00:00	93	0	0	0	0	0	0	0	0	0	0	0	0	0	0	0	0	0	0	0	0	0	0	0	0	0	0	0	0	0	0	0	0	0	0	0	0	0	0	0	0	0	0	0	0	0	0
54	2000-01-01	1899-12-31 12:00:00	93	0	0	0	0	0	0	0	0	0	0	0	0	0	0	0	0	0	0	0	0	0	0	0	0	0	0	0	0	0	0	0	0	0	0	0	0	0	0	0	0	0	0	0	0	0	0
55	2000-01-01	1899-12-31 12:00:00	93	0	0	0	0	0	0	0	0	0	0	0	0	0	0	0	0	0	0	0	0	0	0	0	0	0	0	0	0	0	0	0	0	0	0	0	0	0	0	0	0	0	0	0	0	0	0
56	2000-01-01	1899-12-31 12:00:00	93	0	0	0	0	0	0	0	0	0	0	0	0	0	0	0	0	0	0	0	0	0	0	0	0	0	0	0	0	0	0	0	0	0	0	0	0	0	0	0	0	0	0	0	0	0	0
57	2000-01-01	1899-12-31 12:00:00	93	0	0	0	0	0	0	0	0	0	0	0	0	0	0	0	0	0	0	0	0	0	0	0	0	0	0	0	0	0	0	0	0	0	0	0	0	0	0	0	0	0	0	0	0	0	0
58	2000-01-01	1899-12-31 12:00:00	93	0	0	0	0	0	0	0	0	0	0	0	0	0	0	0	0	0	0	0	0	0	0	0	0	0	0	0	0	0	0	0	0	0	0	0	0	0	0	0	0	0	0	0	0	0	0
59	2000-01-01	1899-12-31 12:00:00	93	0	0	0	0	0	0	0	0	0	0	0	0	0	0	0	0	0	0	0	0	0	0	0	0	0	0	0	0	0	0	0	0	0	0	0	0	0	0	0	0	0	0	0	0	0	0
60	2000-01-01	1899-12-31 12:00:00	93	0	0	0	0	0	0	0	0	0	0	0	0	0	0	0	0	0	0	0	0	0	0	0	0	0	0	0	0	0	0	0	0	0	0	0	0	0	0	0	0	0	0	0	0	0	0
61	2000-01-01	1899-12-31 12:00:00	93	0	0	0	0	0	0	0	0	0	0	0	0	0	0	0	0	0	0	0	0	0	0	0	0	0	0	0	0	0	0	0	0	0	0	0	0	0	0	0	0	0	0	0	0	0	0
62	2000-01-01	1899-12-31 12:00:00	93	0	0	0	0	0	0	0	0	0	0	0	0	0	0	0	0	0	0	0	0	0	0	0	0	0	0	0	0	0	0	0	0	0	0	0	0	0	0	0	0	0	0	0	0	0	0
63	2000-01-01	1899-12-31 12:00:00	93	0	0	0	0	0	0	0	0	0	0	0	0	0	0	0	0	0	0	0	0	0	0	0	0	0	0	0	0	0	0	0	0	0	0	0	0	0	0	0	0	0	0	0	0	0	0
64	2000-01-01	1899-12-31 12:00:00	93	0	0	0	0	0	0	0	0	0	0	0	0	0	0	0	0	0	0	0	0	0	0	0	0	0	0	0	0	0	0	0	0	0	0	0	0	0	0	0	0	0	0	0	0	0	0
65	2000-01-01	1899-12-31 12:00:00	93	0	0	0	0	0	0	0	0	0	0	0	0	0	0	0	0	0	0	0	0	0	0	0	0	0	0	0	0	0	0	0	0	0	0	0	0	0	0	0	0	0	0	0	0	0	0
66	2000-01-01	1899-12-31 12:00:00	93	0	0	0	0	0	0	0	0	0	0	0	0	0	0	0	0	0	0	0	0	0	0	0	0	0	0	0	0	0	0	0	0	0	0	0	0	0	0	0	0	0	0	0	0	0	0
67	2000-01-01	1899-12-31 12:00:00	93	0	0	0	0	0	0	0	0	0	0	0	0	0	0	0	0	0	0	0	0	0	0	0	0	0	0	0	0	0	0	0	0	0	0	0	0	0	0	0	0	0	0	0	0	0	0
68	2000-01-01	1899-12-31 12:00:00	93	0	0	0	0	0	0	0	0	0	0	0	0	0	0	0	0	0	0	0	0	0	0	0	0	0	0	0	0	0	0	0	0	0	0	0	0	0	0	0	0	0	0	0	0	0	0
69	2000-01-01	1899-12-31 12:00:00	93	0	0	0	0	0	0	0	0	0	0	0	0	0	0	0	0	0	0	0	0	0	0	0	0	0	0	0	0	0	0	0	0	0	0	0	0	0	0	0	0	0	0	0	0	0	0
70	2000-01-01	1899-12-31 12:00:00	93	0	0	0	0	0	0	0	0	0	0	0	0	0	0	0	0	0	0	0	0	0	0	0	0	0	0	0	0	0	0	0	0	0	0	0	0	0	0	0	0	0	0	0	0	0	0
71	2000-01-01	1899-12-31 12:00:00	93	0	0	0	0	0	0	0	0	0	0	0	0	0	0	0	0	0	0	0	0	0	0	0	0	0	0	0	0	0	0	0	0	0	0	0	0	0	0	0	0	0	0	0	0	0	0
72	2000-01-01	1899-12-31 12:00:00	93	0	0	0	0	0	0	0	0	0	0	0	0	0	0	0	0	0	0	0	0	0	0	0	0	0	0	0	0	0	0	0	0	0	0	0	0	0	0	0	0	0	0	0	0	0	0
73	2000-01-01	1899-12-31 12:00:00	93	0	0	0	0	0	0	0	0	0	0	0	0	0	0	0	0	0	0	0	0	0	0	0	0	0	0	0	0	0	0	0	0	0	0	0	0	0	0	0	0	0	0	0	0	0	0
74	2000-01-01	1899-12-31 12:00:00	93	0	0	0	0	0	0	0	0	0	0	0	0	0	0	0	0	0	0	0	0	0	0	0	0	0	0	0	0	0	0	0	0	0	0	0	0	0	0	0	0	0	0	0	0	0	0
75	2000-01-01	1899-12-31 12:00:00	93	0	0	0	0	0	0	0	0	0	0	0	0	0	0	0	0	0	0	0	0	0	0	0	0	0	0	0	0	0	0	0	0	0	0	0	0	0	0	0	0	0	0	0	0	0	0
				16	14	18	14	12	16	16	0	0	0	0	0	0	0	0	0	0	0	0	0	20	12	16	15	15	15	15	0	0	0	0	0	0	0	0	0	0	0	0	0	14	15	15	17	14	13
		censors
				1	2	3	4	5	6	7	8	9	10	11	12	13	14	15	16	17	18	19	20	21	22	23	24	25	26	27	28	29	30	31	32	33	34	35	36	37	38	39	40	41	42	43	44	45	46
1	2018-11-22	1899-12-31 12:00:00	3	0	0	1	0	0	0	0	0	0	0	0	0	0	0	0	0	0	0	0	0	0	0	0	0	0	0	0	0	0	0	0	0	0	0	0	0	0	0	0	0	0	0	0	0	1	0
2	2018-11-26	1899-12-31 12:00:00	7	0	0	0	0	0	0	0	0	0	0	0	0	0	0	0	0	0	0	0	0	0	0	0	0	0	0	0	0	0	0	0	0	0	0	0	0	0	0	0	0	0	0	0	0	0	0
3	2018-11-28	1899-12-31 12:00:00	9	0	0	0	0	0	0	0	0	0	0	0	0	0	0	0	0	0	0	0	0	0	0	0	0	0	0	0	0	0	0	0	0	0	0	0	0	0	0	0	0	0	0	0	0	0	0
4	2018-11-30	1899-12-31 12:00:00	11	0	0	0	0	0	0	0	0	0	0	0	0	0	0	0	0	0	0	0	0	0	0	0	0	0	0	0	0	0	0	0	0	0	0	0	0	0	0	0	0	0	0	0	0	1	0
5	2018-12-02	1899-12-31 12:00:00	13	0	0	0	0	0	0	0	0	0	0	0	0	0	0	0	0	0	0	0	0	0	0	0	0	0	0	0	0	0	0	0	0	0	0	0	0	0	0	0	0	0	0	0	0	0	0
6	2018-12-03	1899-12-31 12:00:00	14	0	0	0	0	0	0	0	0	0	0	0	0	0	0	0	0	0	0	0	0	0	0	0	0	0	0	0	0	0	0	0	0	0	0	0	0	0	0	0	0	0	0	0	0	0	0
7	2018-12-04	1899-12-31 12:00:00	15	0	0	0	0	0	0	0	0	0	0	0	0	0	0	0	0	0	0	0	0	0	0	0	0	0	0	0	0	0	0	0	0	0	0	0	0	0	0	0	0	0	0	0	0	0	0
8	2018-12-05	1899-12-31 12:00:00	16	0	0	0	0	0	0	0	0	0	0	0	0	0	0	0	0	0	0	0	0	0	0	0	0	0	0	0	0	0	0	0	0	0	0	0	0	0	0	0	0	0	0	0	0	0	0
9	2018-12-07	1899-12-31 12:00:00	18	0	0	0	0	0	0	0	0	0	0	0	0	0	0	0	0	0	0	0	0	0	0	0	0	0	0	0	0	0	0	0	0	0	0	0	0	0	0	0	0	0	0	0	0	0	0
10	2018-12-10	1899-12-31 12:00:00	21	0	0	0	0	0	0	0	0	0	0	0	0	0	0	0	0	0	0	0	0	0	0	0	0	0	0	0	0	0	0	0	0	0	0	0	0	0	0	0	0	0	0	0	0	0	0
11	2018-12-12	1899-12-31 12:00:00	23	0	0	0	0	0	0	0	0	0	0	0	0	0	0	0	0	0	0	0	0	0	0	0	0	0	0	0	0	0	0	0	0	0	0	0	0	0	0	0	0	0	0	0	0	0	0
12	2018-12-14	1899-12-31 12:00:00	25	0	0	0	0	0	0	0	0	0	0	0	0	0	0	0	0	0	0	0	0	0	0	0	0	0	0	0	0	0	0	0	0	0	0	0	0	0	0	0	0	0	0	0	0	0	0
13	2018-12-17	1899-12-31 12:00:00	28	0	0	0	0	0	0	0	0	0	0	0	0	0	0	0	0	0	0	0	0	0	0	0	0	0	0	0	0	0	0	0	0	0	0	0	0	0	0	0	0	0	0	0	0	0	0
14	2018-12-19	1899-12-31 12:00:00	30	0	0	0	0	0	0	0	0	0	0	0	0	0	0	0	0	0	0	0	0	0	0	0	0	0	0	0	0	0	0	0	0	0	0	0	0	0	0	0	0	0	0	0	0	0	0
15	2018-12-21	1899-12-31 12:00:00	32	0	0	0	0	0	0	0	0	0	0	0	0	0	0	0	0	0	0	0	0	0	0	0	0	0	0	0	0	0	0	0	0	0	0	0	0	0	0	0	0	0	0	0	0	0	0
16	2018-12-24	1899-12-31 12:00:00	35	0	0	0	0	0	0	0	0	0	0	0	0	0	0	0	0	0	0	0	0	0	0	0	0	0	0	0	0	0	0	0	0	0	0	0	0	0	0	0	0	0	0	0	0	0	0
17	2018-12-27	1899-12-31 12:00:00	38	0	0	0	0	0	0	0	0	0	0	0	0	0	0	0	0	0	0	0	0	0	0	0	0	0	0	0	0	0	0	0	0	0	0	0	0	0	0	0	0	0	0	0	0	0	0
18	2018-12-30	1899-12-31 12:00:00	41	0	0	0	0	0	0	0	0	0	0	0	0	0	0	0	0	0	0	0	0	0	0	0	0	0	0	0	0	0	0	0	0	0	0	0	0	0	0	0	0	0	0	0	0	0	0
19	2019-01-01	1899-12-31 12:00:00	43	0	0	0	0	0	0	0	0	0	0	0	0	0	0	0	0	0	0	0	0	0	0	0	0	0	0	0	0	0	0	0	0	0	0	0	0	0	0	0	0	0	0	0	0	0	0
20	2019-01-04	1899-12-31 12:00:00	46	0	0	0	0	0	0	0	0	0	0	0	0	0	0	0	0	0	0	0	0	0	0	0	0	0	0	0	0	0	0	0	0	0	0	0	0	0	0	0	0	0	0	0	0	0	0
21	2019-01-07	1899-12-31 12:00:00	49	0	0	0	0	0	0	0	0	0	0	0	0	0	0	0	0	0	0	0	0	0	0	0	0	0	0	0	0	0	0	0	0	0	0	0	0	0	0	0	0	0	0	0	0	0	0
22	2019-01-09	1899-12-31 12:00:00	51	0	0	0	0	0	0	0	0	0	0	0	0	0	0	0	0	0	0	0	0	0	0	0	0	0	0	0	0	0	0	0	0	0	0	0	0	0	0	0	0	0	0	0	0	0	0
23	2019-01-11	1899-12-31 12:00:00	53	0	0	0	0	0	0	0	0	0	0	0	0	0	0	0	0	0	0	0	0	0	0	0	0	0	0	0	0	0	0	0	0	0	0	0	0	0	0	0	0	0	0	0	0	0	0
24	2019-01-14	1899-12-31 12:00:00	56	0	0	0	0	0	0	0	0	0	0	0	0	0	0	0	0	0	0	0	0	0	0	0	0	0	0	0	0	0	0	0	0	0	0	0	0	0	0	0	0	0	0	0	0	0	0
25	2019-01-16	1899-12-31 12:00:00	58	0	0	0	0	0	0	0	0	0	0	0	0	0	0	0	0	0	0	0	0	0	0	0	0	0	0	0	0	0	0	0	0	0	0	0	0	0	0	0	0	0	0	0	0	0	0
26	2019-01-18	1899-12-31 12:00:00	60	0	0	0	0	1	0	0	0	0	0	0	0	0	0	0	0	0	0	0	0	0	0	0	0	0	0	0	0	0	0	0	0	0	0	0	0	0	0	0	0	0	0	0	0	0	0
27	2019-01-21	1899-12-31 12:00:00	63	0	0	0	0	0	0	0	0	0	0	0	0	0	0	0	0	0	0	0	0	0	0	0	0	0	0	0	0	0	0	0	0	0	0	0	0	0	0	0	0	0	0	0	0	0	0
28	2019-01-23	1899-12-31 12:00:00	65	0	0	0	0	0	0	0	0	0	0	0	0	0	0	0	0	0	0	0	0	0	0	0	0	0	0	0	0	0	0	0	0	0	0	0	0	0	0	0	0	0	0	0	0	0	0
29	2019-01-25	1899-12-31 12:00:00	67	0	0	0	0	0	0	0	0	0	0	0	0	0	0	0	0	0	0	0	0	0	0	0	0	0	0	0	0	0	0	0	0	0	0	0	0	0	0	0	0	0	0	0	0	0	0
30	2019-01-28	1899-12-31 12:00:00	70	0	0	0	0	0	0	0	0	0	0	0	0	0	0	0	0	0	0	0	0	0	0	0	0	0	0	0	0	0	0	0	0	0	0	0	0	0	0	0	0	0	0	0	0	0	0
31	2019-01-30	1899-12-31 12:00:00	72	0	0	0	0	0	0	0	0	0	0	0	0	0	0	0	0	0	0	0	0	0	0	0	0	0	0	0	0	0	0	0	0	0	0	0	0	0	0	0	0	0	0	0	0	0	0
32	2019-02-01	1899-12-31 12:00:00	74	0	0	0	0	0	0	0	0	0	0	0	0	0	0	0	0	0	0	0	0	0	0	0	0	0	0	0	0	0	0	0	0	0	0	0	0	0	0	0	0	0	0	0	0	0	0
33	2019-02-04	1899-12-31 12:00:00	77	0	0	0	0	0	0	0	0	0	0	0	0	0	0	0	0	0	0	0	0	0	0	0	0	0	0	0	0	0	0	0	0	0	0	0	0	0	0	0	0	0	0	0	0	0	0
34	2019-02-06	1899-12-31 12:00:00	79	0	0	0	0	0	0	0	0	0	0	0	0	0	0	0	0	0	0	0	0	0	0	0	0	0	0	0	0	0	0	0	0	0	0	0	0	0	0	0	0	0	0	0	0	0	0
35	2019-02-08	1899-12-31 12:00:00	81	0	0	0	0	0	0	0	0	0	0	0	0	0	0	0	0	0	0	0	0	0	0	0	0	0	0	0	0	0	0	0	0	0	0	0	0	0	0	0	0	0	0	0	0	0	0
36	2019-02-11	1899-12-31 12:00:00	84	0	0	0	0	0	0	0	0	0	0	0	0	0	0	0	0	0	0	0	0	0	0	0	0	0	0	0	0	0	0	0	0	0	0	0	0	0	0	0	0	0	0	0	0	0	0
37	2019-02-13	1899-12-31 12:00:00	86	0	0	0	0	0	0	0	0	0	0	0	0	0	0	0	0	0	0	0	0	0	0	0	0	0	0	0	0	0	0	0	0	0	0	0	0	0	0	0	0	0	0	0	0	0	0
38	2019-02-15	1899-12-31 12:00:00	88	0	0	0	0	0	0	0	0	0	0	0	0	0	0	0	0	0	0	0	0	0	0	0	0	0	0	0	0	0	0	0	0	0	0	0	0	0	0	0	0	0	0	0	0	0	0
39	2019-02-18	1899-12-31 12:00:00	91	0	0	0	0	0	0	0	0	0	0	0	0	0	0	0	0	0	0	0	0	0	0	0	0	0	0	0	0	0	0	0	0	0	0	0	0	0	0	0	0	0	0	0	0	0	0
40	2019-02-20	1899-12-31 12:00:00	93	0	0	0	0	0	0	0	0	0	0	0	0	0	0	0	0	0	0	0	0	0	0	0	0	0	0	0	0	0	0	0	0	0	0	0	0	0	0	0	0	0	0	0	0	0	0
41	2000-02-22	1899-12-31 12:00:00	93	0	0	0	0	0	0	0	0	0	0	0	0	0	0	0	0	0	0	0	0	0	0	0	0	0	0	0	0	0	0	0	0	0	0	0	0	0	0	0	0	0	0	0	0	0	0
42	2000-01-01	1899-12-31 12:00:00	93	0	0	0	0	0	0	0	0	0	0	0	0	0	0	0	0	0	0	0	0	0	0	0	0	0	0	0	0	0	0	0	0	0	0	0	0	0	0	0	0	0	0	0	0	0	0
43	2000-01-01	1899-12-31 12:00:00	93	0	0	0	0	0	0	0	0	0	0	0	0	0	0	0	0	0	0	0	0	0	0	0	0	0	0	0	0	0	0	0	0	0	0	0	0	0	0	0	0	0	0	0	0	0	0
44	2000-01-01	1899-12-31 12:00:00	93	0	0	0	0	0	0	0	0	0	0	0	0	0	0	0	0	0	0	0	0	0	0	0	0	0	0	0	0	0	0	0	0	0	0	0	0	0	0	0	0	0	0	0	0	0	0
45	2000-01-01	1899-12-31 12:00:00	93	0	0	0	0	0	0	0	0	0	0	0	0	0	0	0	0	0	0	0	0	0	0	0	0	0	0	0	0	0	0	0	0	0	0	0	0	0	0	0	0	0	0	0	0	0	0
46	2000-01-01	1899-12-31 12:00:00	93	0	0	0	0	0	0	0	0	0	0	0	0	0	0	0	0	0	0	0	0	0	0	0	0	0	0	0	0	0	0	0	0	0	0	0	0	0	0	0	0	0	0	0	0	0	0
47	2000-01-01	1899-12-31 12:00:00	93	0	0	0	0	0	0	0	0	0	0	0	0	0	0	0	0	0	0	0	0	0	0	0	0	0	0	0	0	0	0	0	0	0	0	0	0	0	0	0	0	0	0	0	0	0	0
48	2000-01-01	1899-12-31 12:00:00	93	0	0	0	0	0	0	0	0	0	0	0	0	0	0	0	0	0	0	0	0	0	0	0	0	0	0	0	0	0	0	0	0	0	0	0	0	0	0	0	0	0	0	0	0	0	0
49	2000-01-01	1899-12-31 12:00:00	93	0	0	0	0	0	0	0	0	0	0	0	0	0	0	0	0	0	0	0	0	0	0	0	0	0	0	0	0	0	0	0	0	0	0	0	0	0	0	0	0	0	0	0	0	0	0
50	2000-01-01	1899-12-31 12:00:00	93	0	0	0	0	0	0	0	0	0	0	0	0	0	0	0	0	0	0	0	0	0	0	0	0	0	0	0	0	0	0	0	0	0	0	0	0	0	0	0	0	0	0	0	0	0	0
51	2000-01-01	1899-12-31 12:00:00	93	0	0	0	0	0	0	0	0	0	0	0	0	0	0	0	0	0	0	0	0	0	0	0	0	0	0	0	0	0	0	0	0	0	0	0	0	0	0	0	0	0	0	0	0	0	0
52	2000-01-01	1899-12-31 12:00:00	93	0	0	0	0	0	0	0	0	0	0	0	0	0	0	0	0	0	0	0	0	0	0	0	0	0	0	0	0	0	0	0	0	0	0	0	0	0	0	0	0	0	0	0	0	0	0
53	2000-01-01	1899-12-31 12:00:00	93	0	0	0	0	0	0	0	0	0	0	0	0	0	0	0	0	0	0	0	0	0	0	0	0	0	0	0	0	0	0	0	0	0	0	0	0	0	0	0	0	0	0	0	0	0	0
54	2000-01-01	1899-12-31 12:00:00	93	0	0	0	0	0	0	0	0	0	0	0	0	0	0	0	0	0	0	0	0	0	0	0	0	0	0	0	0	0	0	0	0	0	0	0	0	0	0	0	0	0	0	0	0	0	0
55	2000-01-01	1899-12-31 12:00:00	93	0	0	0	0	0	0	0	0	0	0	0	0	0	0	0	0	0	0	0	0	0	0	0	0	0	0	0	0	0	0	0	0	0	0	0	0	0	0	0	0	0	0	0	0	0	0
56	2000-01-01	1899-12-31 12:00:00	93	0	0	0	0	0	0	0	0	0	0	0	0	0	0	0	0	0	0	0	0	0	0	0	0	0	0	0	0	0	0	0	0	0	0	0	0	0	0	0	0	0	0	0	0	0	0
57	2000-01-01	1899-12-31 12:00:00	93	0	0	0	0	0	0	0	0	0	0	0	0	0	0	0	0	0	0	0	0	0	0	0	0	0	0	0	0	0	0	0	0	0	0	0	0	0	0	0	0	0	0	0	0	0	0
58	2000-01-01	1899-12-31 12:00:00	93	0	0	0	0	0	0	0	0	0	0	0	0	0	0	0	0	0	0	0	0	0	0	0	0	0	0	0	0	0	0	0	0	0	0	0	0	0	0	0	0	0	0	0	0	0	0
59	2000-01-01	1899-12-31 12:00:00	93	0	0	0	0	0	0	0	0	0	0	0	0	0	0	0	0	0	0	0	0	0	0	0	0	0	0	0	0	0	0	0	0	0	0	0	0	0	0	0	0	0	0	0	0	0	0
60	2000-01-01	1899-12-31 12:00:00	93	0	0	0	0	0	0	0	0	0	0	0	0	0	0	0	0	0	0	0	0	0	0	0	0	0	0	0	0	0	0	0	0	0	0	0	0	0	0	0	0	0	0	0	0	0	0
61	2000-01-01	1899-12-31 12:00:00	93	0	0	0	0	0	0	0	0	0	0	0	0	0	0	0	0	0	0	0	0	0	0	0	0	0	0	0	0	0	0	0	0	0	0	0	0	0	0	0	0	0	0	0	0	0	0
62	2000-01-01	1899-12-31 12:00:00	93	0	0	0	0	0	0	0	0	0	0	0	0	0	0	0	0	0	0	0	0	0	0	0	0	0	0	0	0	0	0	0	0	0	0	0	0	0	0	0	0	0	0	0	0	0	0
63	2000-01-01	1899-12-31 12:00:00	93	0	0	0	0	0	0	0	0	0	0	0	0	0	0	0	0	0	0	0	0	0	0	0	0	0	0	0	0	0	0	0	0	0	0	0	0	0	0	0	0	0	0	0	0	0	0
64	2000-01-01	1899-12-31 12:00:00	93	0	0	0	0	0	0	0	0	0	0	0	0	0	0	0	0	0	0	0	0	0	0	0	0	0	0	0	0	0	0	0	0	0	0	0	0	0	0	0	0	0	0	0	0	0	0
65	2000-01-01	1899-12-31 12:00:00	93	0	0	0	0	0	0	0	0	0	0	0	0	0	0	0	0	0	0	0	0	0	0	0	0	0	0	0	0	0	0	0	0	0	0	0	0	0	0	0	0	0	0	0	0	0	0
66	2000-01-01	1899-12-31 12:00:00	93	0	0	0	0	0	0	0	0	0	0	0	0	0	0	0	0	0	0	0	0	0	0	0	0	0	0	0	0	0	0	0	0	0	0	0	0	0	0	0	0	0	0	0	0	0	0
67	2000-01-01	1899-12-31 12:00:00	93	0	0	0	0	0	0	0	0	0	0	0	0	0	0	0	0	0	0	0	0	0	0	0	0	0	0	0	0	0	0	0	0	0	0	0	0	0	0	0	0	0	0	0	0	0	0
68	2000-01-01	1899-12-31 12:00:00	93	0	0	0	0	0	0	0	0	0	0	0	0	0	0	0	0	0	0	0	0	0	0	0	0	0	0	0	0	0	0	0	0	0	0	0	0	0	0	0	0	0	0	0	0	0	0
69	2000-01-01	1899-12-31 12:00:00	93	0	0	0	0	0	0	0	0	0	0	0	0	0	0	0	0	0	0	0	0	0	0	0	0	0	0	0	0	0	0	0	0	0	0	0	0	0	0	0	0	0	0	0	0	0	0
70	2000-01-01	1899-12-31 12:00:00	93	0	0	0	0	0	0	0	0	0	0	0	0	0	0	0	0	0	0	0	0	0	0	0	0	0	0	0	0	0	0	0	0	0	0	0	0	0	0	0	0	0	0	0	0	0	0
71	2000-01-01	1899-12-31 12:00:00	93	0	0	0	0	0	0	0	0	0	0	0	0	0	0	0	0	0	0	0	0	0	0	0	0	0	0	0	0	0	0	0	0	0	0	0	0	0	0	0	0	0	0	0	0	0	0
72	2000-01-01	1899-12-31 12:00:00	93	0	0	0	0	0	0	0	0	0	0	0	0	0	0	0	0	0	0	0	0	0	0	0	0	0	0	0	0	0	0	0	0	0	0	0	0	0	0	0	0	0	0	0	0	0	0
73	2000-01-01	1899-12-31 12:00:00	93	0	0	0	0	0	0	0	0	0	0	0	0	0	0	0	0	0	0	0	0	0	0	0	0	0	0	0	0	0	0	0	0	0	0	0	0	0	0	0	0	0	0	0	0	0	0
74	2000-01-01	1899-12-31 12:00:00	93	0	0	0	0	0	0	0	0	0	0	0	0	0	0	0	0	0	0	0	0	0	0	0	0	0	0	0	0	0	0	0	0	0	0	0	0	0	0	0	0	0	0	0	0	0	0
75	2000-01-01	1899-12-31 12:00:00	93	0	0	0	0	0	0	0	0	0	0	0	0	0	0	0	0	0	0	0	0	0	0	0	0	0	0	0	0	0	0	0	0	0	0	0	0	0	0	0	0	0	0	0	0	0	0
				0	0	1	0	1	0	0	0	0	0	0	0	0	0	0	0	0	0	0	0	0	0	0	0	0	0	0	0	0	0	0	0	0	0	0	0	0	0	0	0	0	0	0	0	2	0
[truncated: 154 more columns]

## Sheet: Nx per bottle
			deaths
				bottle number
	date	time	day	1	2	3	4	5	6	7	8	9	10	11	12	13	14	15	16	17	18	19	20	21	22	23	24	25	26	27	28	29	30	31	32	33	34	35	36	37	38	39	40	41	42	43	44	45	46
0	2018-11-19	1899-12-31 12:00:00	0	15	15	15	15	15	15	15	15	15	15	15	15	15	15	15	15	15	15	15	15	15	15	15	15	15	15	15	15	15	15	15	15	15	15	15	15	15	15	15	15	15	15	15	15	15	15
1	2018-11-22	1899-12-31 12:00:00	3	15	15	14	15	15	15	15	15	15	15	15	15	15	15	15	15	15	15	15	15	15	15	15	15	15	15	15	15	15	15	15	15	15	15	15	15	15	15	15	15	15	15	15	15	14	15
2	2018-11-26	1899-12-31 12:00:00	7	15	15	14	15	15	15	15	15	15	15	15	15	15	15	15	15	15	15	15	15	15	15	15	15	15	15	15	15	15	15	15	15	15	15	15	15	15	15	15	15	15	15	15	15	14	15
3	2018-11-28	1899-12-31 12:00:00	9	15	15	14	15	15	15	15	15	15	15	15	15	15	15	15	15	15	15	15	15	15	15	15	15	15	15	15	15	15	15	15	15	15	15	15	15	15	15	15	15	15	15	15	15	14	15
4	2018-11-30	1899-12-31 12:00:00	11	15	15	14	15	15	15	15	15	15	15	15	15	15	15	15	15	15	15	15	15	15	15	15	15	15	15	15	15	15	15	15	15	15	15	15	15	15	15	15	15	15	15	15	15	13	15
5	2018-12-02	1899-12-31 12:00:00	13	15	15	14	15	15	15	15	15	15	15	15	15	15	15	15	15	15	15	15	15	15	15	15	15	15	15	15	15	15	15	15	15	15	15	15	15	15	15	15	15	15	15	15	15	13	15
6	2018-12-03	1899-12-31 12:00:00	14	15	15	14	15	15	15	15	15	15	15	15	15	15	15	15	15	15	15	15	15	15	15	15	15	15	15	15	15	15	15	15	15	15	15	15	15	15	15	15	15	15	15	15	15	13	15
7	2018-12-04	1899-12-31 12:00:00	15	15	15	14	15	15	15	15	15	15	15	15	15	15	15	15	15	15	15	15	15	15	15	15	15	15	15	15	15	15	15	15	15	15	15	15	15	15	15	15	15	15	15	15	15	13	15
8	2018-12-05	1899-12-31 12:00:00	16	15	15	14	15	15	15	15	15	15	15	15	15	15	15	15	15	15	15	15	15	15	15	15	15	15	15	15	15	15	15	15	15	15	15	15	15	15	15	15	15	15	15	15	15	13	15
9	2018-12-07	1899-12-31 12:00:00	18	15	15	14	15	15	15	15	15	15	15	15	15	15	15	15	15	15	15	15	15	15	15	15	15	15	15	15	15	15	15	15	15	15	15	15	15	15	15	15	15	15	15	15	15	13	15
10	2018-12-10	1899-12-31 12:00:00	21	15	15	14	15	15	15	15	15	15	15	15	15	15	15	15	15	15	15	15	15	15	15	15	15	15	15	15	15	15	15	15	15	15	15	15	15	15	15	15	15	15	15	15	15	13	15
11	2018-12-12	1899-12-31 12:00:00	23	15	15	14	15	15	15	15	15	15	15	15	15	15	15	15	15	15	15	15	15	15	15	15	15	15	15	15	15	15	15	15	15	15	15	15	15	15	15	15	15	15	15	15	15	13	15
12	2018-12-14	1899-12-31 12:00:00	25	15	15	14	15	15	15	15	15	15	15	15	15	15	15	15	15	15	15	15	15	15	15	15	15	15	15	15	15	15	15	15	15	15	15	15	15	15	15	15	15	15	15	15	15	13	15
13	2018-12-17	1899-12-31 12:00:00	28	15	15	14	15	15	15	15	15	15	15	15	15	15	15	15	15	15	15	15	15	15	15	15	15	15	15	15	15	15	15	15	15	15	15	15	15	15	15	15	15	15	15	15	15	13	15
14	2018-12-19	1899-12-31 12:00:00	30	15	15	14	15	15	15	15	15	15	15	15	15	15	15	15	15	15	15	15	15	15	15	15	15	15	15	15	15	15	15	15	15	15	15	15	15	15	15	15	15	15	15	15	15	13	15
15	2018-12-21	1899-12-31 12:00:00	32	15	15	14	15	14	15	15	15	15	15	15	15	15	15	15	15	15	15	15	15	15	15	15	15	15	15	15	15	15	15	15	15	15	15	15	15	15	15	15	15	15	15	15	15	13	15
16	2018-12-24	1899-12-31 12:00:00	35	15	15	14	15	13	15	15	15	15	15	15	15	15	15	15	15	15	15	15	15	15	15	15	14	15	14	15	15	15	15	15	15	15	15	15	15	15	15	15	15	14	15	15	15	13	15
17	2018-12-27	1899-12-31 12:00:00	38	15	15	14	15	13	15	15	15	15	15	15	15	15	15	15	15	15	15	15	15	15	15	15	14	15	14	15	15	15	15	15	15	15	15	15	15	15	15	15	15	14	15	15	15	13	15
18	2018-12-30	1899-12-31 12:00:00	41	15	15	14	15	13	15	15	15	15	15	15	15	15	15	15	15	15	15	15	15	15	15	15	14	15	14	15	15	15	15	15	15	15	15	15	15	15	15	15	15	13	15	15	15	13	15
19	2019-01-01	1899-12-31 12:00:00	43	15	15	14	15	13	15	15	15	15	15	15	15	15	15	15	15	15	15	15	15	15	15	15	14	15	14	15	15	15	15	15	15	15	15	15	15	15	15	15	15	13	15	15	15	13	15
20	2019-01-04	1899-12-31 12:00:00	46	15	15	14	15	13	15	15	15	15	15	15	15	15	15	15	15	15	15	15	15	15	15	15	14	15	13	13	15	15	15	15	15	15	15	15	15	15	15	15	15	13	15	15	15	13	15
21	2019-01-07	1899-12-31 12:00:00	49	15	15	14	15	13	15	14	15	15	15	15	15	15	15	15	15	15	15	15	15	14	15	15	13	15	13	12	15	15	15	15	15	15	15	15	15	15	15	15	15	13	15	15	15	13	15
22	2019-01-09	1899-12-31 12:00:00	51	15	15	14	15	13	15	14	15	15	15	15	15	15	15	15	15	15	15	15	15	14	14	15	13	15	13	10	15	15	15	15	15	15	15	15	15	15	15	15	15	13	15	15	15	13	15
23	2019-01-11	1899-12-31 12:00:00	53	15	15	14	14	13	14	14	15	15	15	15	15	15	15	15	15	15	15	15	15	14	14	15	13	15	13	8	15	15	15	15	15	15	15	15	15	15	15	15	15	13	14	15	15	13	15
24	2019-01-14	1899-12-31 12:00:00	56	15	15	13	13	13	14	14	15	15	15	15	15	15	15	15	15	15	15	15	15	14	11	15	13	15	12	6	15	15	15	15	15	15	15	15	15	15	15	15	15	13	14	15	15	11	14
25	2019-01-16	1899-12-31 12:00:00	58	14	15	13	12	12	13	14	15	15	15	15	15	15	15	15	15	15	15	15	15	14	11	15	13	15	12	4	15	15	15	15	15	15	15	15	15	15	15	15	15	13	14	15	15	11	14
26	2019-01-18	1899-12-31 12:00:00	60	13	15	12	11	10	13	14	15	15	15	15	15	15	15	15	15	15	15	15	15	14	11	15	12	15	12	3	15	15	15	15	15	15	15	15	15	15	15	15	15	11	14	15	15	11	14
27	2019-01-21	1899-12-31 12:00:00	63	13	14	10	8	9	13	14	15	15	15	15	15	15	15	15	15	15	15	15	15	13	9	14	12	15	10	1	15	15	15	15	15	15	15	15	15	15	15	15	15	10	14	15	15	11	13
28	2019-01-23	1899-12-31 12:00:00	65	13	13	5	6	9	11	14	15	15	15	15	15	15	15	15	15	15	15	15	15	11	9	12	11	14	7	1	15	15	15	15	15	15	15	15	15	15	15	15	15	9	12	15	15	10	11
29	2019-01-25	1899-12-31 12:00:00	67	12	12	5	5	8	11	14	15	15	15	15	15	15	15	15	15	15	15	15	15	10	9	12	11	13	6	1	15	15	15	15	15	15	15	15	15	15	15	15	15	8	12	13	14	10	11
30	2019-01-28	1899-12-31 12:00:00	70	12	9	2	4	5	9	13	15	15	15	15	15	15	15	15	15	15	15	15	15	9	7	12	9	12	4	1	15	15	15	15	15	15	15	15	15	15	15	15	15	6	8	10	14	5	6
31	2019-01-30	1899-12-31 12:00:00	72	9	8	2	3	5	6	12	15	15	15	15	15	15	15	15	15	15	15	15	15	9	7	9	9	11	4	1	15	15	15	15	15	15	15	15	15	15	15	15	15	6	7	8	13	3	4
32	2019-02-01	1899-12-31 12:00:00	74	8	5	0	2	5	3	11	15	15	15	15	15	15	15	15	15	15	15	15	15	7	6	7	7	10	4	1	15	15	15	15	15	15	15	15	15	15	15	15	15	6	6	7	13	3	4
33	2019-02-04	1899-12-31 12:00:00	77	5	3	-4	1	5	2	5	15	15	15	15	15	15	15	15	15	15	15	15	15	3	4	4	5	8	1	1	15	15	15	15	15	15	15	15	15	15	15	15	15	2	5	5	11	1	3
34	2019-02-06	1899-12-31 12:00:00	79	5	3	-4	1	5	2	3	15	15	15	15	15	15	15	15	15	15	15	15	15	3	4	3	4	7	0	1	15	15	15	15	15	15	15	15	15	15	15	15	15	2	5	4	11	0	2
35	2019-02-08	1899-12-31 12:00:00	81	2	2	-4	1	3	0	1	15	15	15	15	15	15	15	15	15	15	15	15	15	0	4	3	2	4	0	1	15	15	15	15	15	15	15	15	15	15	15	15	15	2	2	3	8	0	2
36	2019-02-11	1899-12-31 12:00:00	84	1	1	-4	1	3	-1	0	15	15	15	15	15	15	15	15	15	15	15	15	15	-4	3	0	1	1	0	0	15	15	15	15	15	15	15	15	15	15	15	15	15	2	2	2	6	-1	2
37	2019-02-13	1899-12-31 12:00:00	86	0	1	-4	1	2	-1	-1	15	15	15	15	15	15	15	15	15	15	15	15	15	-4	3	-1	0	1	0	0	15	15	15	15	15	15	15	15	15	15	15	15	15	2	2	1	5	-1	2
38	2019-02-15	1899-12-31 12:00:00	88	0	1	-4	1	2	-1	-1	15	15	15	15	15	15	15	15	15	15	15	15	15	-4	3	-1	0	1	0	0	15	15	15	15	15	15	15	15	15	15	15	15	15	1	0	1	4	-1	2
39	2019-02-18	1899-12-31 12:00:00	91	-1	1	-4	1	2	-1	-1	15	15	15	15	15	15	15	15	15	15	15	15	15	-5	3	-1	0	0	0	0	15	15	15	15	15	15	15	15	15	15	15	15	15	1	0	0	2	-1	2
40	2019-02-20	1899-12-31 12:00:00	93	-1	1	-4	1	2	-1	-1	15	15	15	15	15	15	15	15	15	15	15	15	15	-5	3	-1	0	0	0	0	15	15	15	15	15	15	15	15	15	15	15	15	15	1	0	0	1	-1	2
41	2000-02-22	1899-12-31 12:00:00	93	-1	1	-4	1	2	-1	-1	15	15	15	15	15	15	15	15	15	15	15	15	15	-5	3	-1	0	0	0	0	15	15	15	15	15	15	15	15	15	15	15	15	15	1	0	0	-2	-1	2
42	2000-01-01	1899-12-31 12:00:00	93	-1	1	-4	1	2	-1	-1	15	15	15	15	15	15	15	15	15	15	15	15	15	-5	3	-1	0	0	0	0	15	15	15	15	15	15	15	15	15	15	15	15	15	1	0	0	-2	-1	2
43	2000-01-01	1899-12-31 12:00:00	93	-1	1	-4	1	2	-1	-1	15	15	15	15	15	15	15	15	15	15	15	15	15	-5	3	-1	0	0	0	0	15	15	15	15	15	15	15	15	15	15	15	15	15	1	0	0	-2	-1	2
44	2000-01-01	1899-12-31 12:00:00	93	-1	1	-4	1	2	-1	-1	15	15	15	15	15	15	15	15	15	15	15	15	15	-5	3	-1	0	0	0	0	15	15	15	15	15	15	15	15	15	15	15	15	15	1	0	0	-2	-1	2
45	2000-01-01	1899-12-31 12:00:00	93	-1	1	-4	1	2	-1	-1	15	15	15	15	15	15	15	15	15	15	15	15	15	-5	3	-1	0	0	0	0	15	15	15	15	15	15	15	15	15	15	15	15	15	1	0	0	-2	-1	2
46	2000-01-01	1899-12-31 12:00:00	93	-1	1	-4	1	2	-1	-1	15	15	15	15	15	15	15	15	15	15	15	15	15	-5	3	-1	0	0	0	0	15	15	15	15	15	15	15	15	15	15	15	15	15	1	0	0	-2	-1	2
47	2000-01-01	1899-12-31 12:00:00	93	-1	1	-4	1	2	-1	-1	15	15	15	15	15	15	15	15	15	15	15	15	15	-5	3	-1	0	0	0	0	15	15	15	15	15	15	15	15	15	15	15	15	15	1	0	0	-2	-1	2
48	2000-01-01	1899-12-31 12:00:00	93	-1	1	-4	1	2	-1	-1	15	15	15	15	15	15	15	15	15	15	15	15	15	-5	3	-1	0	0	0	0	15	15	15	15	15	15	15	15	15	15	15	15	15	1	0	0	-2	-1	2
49	2000-01-01	1899-12-31 12:00:00	93	-1	1	-4	1	2	-1	-1	15	15	15	15	15	15	15	15	15	15	15	15	15	-5	3	-1	0	0	0	0	15	15	15	15	15	15	15	15	15	15	15	15	15	1	0	0	-2	-1	2
50	2000-01-01	1899-12-31 12:00:00	93	-1	1	-4	1	2	-1	-1	15	15	15	15	15	15	15	15	15	15	15	15	15	-5	3	-1	0	0	0	0	15	15	15	15	15	15	15	15	15	15	15	15	15	1	0	0	-2	-1	2
51	2000-01-01	1899-12-31 12:00:00	93	-1	1	-4	1	2	-1	-1	15	15	15	15	15	15	15	15	15	15	15	15	15	-5	3	-1	0	0	0	0	15	15	15	15	15	15	15	15	15	15	15	15	15	1	0	0	-2	-1	2
52	2000-01-01	1899-12-31 12:00:00	93	-1	1	-4	1	2	-1	-1	15	15	15	15	15	15	15	15	15	15	15	15	15	-5	3	-1	0	0	0	0	15	15	15	15	15	15	15	15	15	15	15	15	15	1	0	0	-2	-1	2
53	2000-01-01	1899-12-31 12:00:00	93	-1	1	-4	1	2	-1	-1	15	15	15	15	15	15	15	15	15	15	15	15	15	-5	3	-1	0	0	0	0	15	15	15	15	15	15	15	15	15	15	15	15	15	1	0	0	-2	-1	2
54	2000-01-01	1899-12-31 12:00:00	93	-1	1	-4	1	2	-1	-1	15	15	15	15	15	15	15	15	15	15	15	15	15	-5	3	-1	0	0	0	0	15	15	15	15	15	15	15	15	15	15	15	15	15	1	0	0	-2	-1	2
55	2000-01-01	1899-12-31 12:00:00	93	-1	1	-4	1	2	-1	-1	15	15	15	15	15	15	15	15	15	15	15	15	15	-5	3	-1	0	0	0	0	15	15	15	15	15	15	15	15	15	15	15	15	15	1	0	0	-2	-1	2
56	2000-01-01	1899-12-31 12:00:00	93	-1	1	-4	1	2	-1	-1	15	15	15	15	15	15	15	15	15	15	15	15	15	-5	3	-1	0	0	0	0	15	15	15	15	15	15	15	15	15	15	15	15	15	1	0	0	-2	-1	2
57	2000-01-01	1899-12-31 12:00:00	93	-1	1	-4	1	2	-1	-1	15	15	15	15	15	15	15	15	15	15	15	15	15	-5	3	-1	0	0	0	0	15	15	15	15	15	15	15	15	15	15	15	15	15	1	0	0	-2	-1	2
58	2000-01-01	1899-12-31 12:00:00	93	-1	1	-4	1	2	-1	-1	15	15	15	15	15	15	15	15	15	15	15	15	15	-5	3	-1	0	0	0	0	15	15	15	15	15	15	15	15	15	15	15	15	15	1	0	0	-2	-1	2
59	2000-01-01	1899-12-31 12:00:00	93	-1	1	-4	1	2	-1	-1	15	15	15	15	15	15	15	15	15	15	15	15	15	-5	3	-1	0	0	0	0	15	15	15	15	15	15	15	15	15	15	15	15	15	1	0	0	-2	-1	2
60	2000-01-01	1899-12-31 12:00:00	93	-1	1	-4	1	2	-1	-1	15	15	15	15	15	15	15	15	15	15	15	15	15	-5	3	-1	0	0	0	0	15	15	15	15	15	15	15	15	15	15	15	15	15	1	0	0	-2	-1	2
61	2000-01-01	1899-12-31 12:00:00	93	-1	1	-4	1	2	-1	-1	15	15	15	15	15	15	15	15	15	15	15	15	15	-5	3	-1	0	0	0	0	15	15	15	15	15	15	15	15	15	15	15	15	15	1	0	0	-2	-1	2
62	2000-01-01	1899-12-31 12:00:00	93	-1	1	-4	1	2	-1	-1	15	15	15	15	15	15	15	15	15	15	15	15	15	-5	3	-1	0	0	0	0	15	15	15	15	15	15	15	15	15	15	15	15	15	1	0	0	-2	-1	2
63	2000-01-01	1899-12-31 12:00:00	93	-1	1	-4	1	2	-1	-1	15	15	15	15	15	15	15	15	15	15	15	15	15	-5	3	-1	0	0	0	0	15	15	15	15	15	15	15	15	15	15	15	15	15	1	0	0	-2	-1	2
64	2000-01-01	1899-12-31 12:00:00	93	-1	1	-4	1	2	-1	-1	15	15	15	15	15	15	15	15	15	15	15	15	15	-5	3	-1	0	0	0	0	15	15	15	15	15	15	15	15	15	15	15	15	15	1	0	0	-2	-1	2
65	2000-01-01	1899-12-31 12:00:00	93	-1	1	-4	1	2	-1	-1	15	15	15	15	15	15	15	15	15	15	15	15	15	-5	3	-1	0	0	0	0	15	15	15	15	15	15	15	15	15	15	15	15	15	1	0	0	-2	-1	2
66	2000-01-01	1899-12-31 12:00:00	93	-1	1	-4	1	2	-1	-1	15	15	15	15	15	15	15	15	15	15	15	15	15	-5	3	-1	0	0	0	0	15	15	15	15	15	15	15	15	15	15	15	15	15	1	0	0	-2	-1	2
67	2000-01-01	1899-12-31 12:00:00	93	-1	1	-4	1	2	-1	-1	15	15	15	15	15	15	15	15	15	15	15	15	15	-5	3	-1	0	0	0	0	15	15	15	15	15	15	15	15	15	15	15	15	15	1	0	0	-2	-1	2
68	2000-01-01	1899-12-31 12:00:00	93	-1	1	-4	1	2	-1	-1	15	15	15	15	15	15	15	15	15	15	15	15	15	-5	3	-1	0	0	0	0	15	15	15	15	15	15	15	15	15	15	15	15	15	1	0	0	-2	-1	2
69	2000-01-01	1899-12-31 12:00:00	93	-1	1	-4	1	2	-1	-1	15	15	15	15	15	15	15	15	15	15	15	15	15	-5	3	-1	0	0	0	0	15	15	15	15	15	15	15	15	15	15	15	15	15	1	0	0	-2	-1	2
70	2000-01-01	1899-12-31 12:00:00	93	-1	1	-4	1	2	-1	-1	15	15	15	15	15	15	15	15	15	15	15	15	15	-5	3	-1	0	0	0	0	15	15	15	15	15	15	15	15	15	15	15	15	15	1	0	0	-2	-1	2
71	2000-01-01	1899-12-31 12:00:00	93	-1	1	-4	1	2	-1	-1	15	15	15	15	15	15	15	15	15	15	15	15	15	-5	3	-1	0	0	0	0	15	15	15	15	15	15	15	15	15	15	15	15	15	1	0	0	-2	-1	2
72	2000-01-01	1899-12-31 12:00:00	93	-1	1	-4	1	2	-1	-1	15	15	15	15	15	15	15	15	15	15	15	15	15	-5	3	-1	0	0	0	0	15	15	15	15	15	15	15	15	15	15	15	15	15	1	0	0	-2	-1	2
73	2000-01-01	1899-12-31 12:00:00	93	-1	1	-4	1	2	-1	-1	15	15	15	15	15	15	15	15	15	15	15	15	15	-5	3	-1	0	0	0	0	15	15	15	15	15	15	15	15	15	15	15	15	15	1	0	0	-2	-1	2
74	2000-01-01	1899-12-31 12:00:00	93	-1	1	-4	1	2	-1	-1	15	15	15	15	15	15	15	15	15	15	15	15	15	-5	3	-1	0	0	0	0	15	15	15	15	15	15	15	15	15	15	15	15	15	1	0	0	-2	-1	2
75	2000-01-01	1899-12-31 12:00:00	93	-1	1	-4	1	2	-1	-1	15	15	15	15	15	15	15	15	15	15	15	15	15	-5	3	-1	0	0	0	0	15	15	15	15	15	15	15	15	15	15	15	15	15	1	0	0	-2	-1	2
				-1	1	-4	1	2	-1	-1	15	15	15	15	15	15	15	15	15	15	15	15	15	-5	3	-1	0	0	0	0	15	15	15	15	15	15	15	15	15	15	15	15	15	1	0	0	-2	-1	2
[truncated: 154 more columns]

## Sheet: Px per bottle
			deaths
				15	15	15	15	15	15	15	15	15	15	15	15	15	15	15	15	15	15	15	15	15	15	15	15	15	15	15	15	15	15	15	15	15	15	15	15	15	15	15	15	15	15	15	15	15	15
0				16	14	19	14	13	16	16	0	0	0	0	0	0	0	0	0	0	0	0	0	20	12	16	15	15	15	15	0	0	0	0	0	0	0	0	0	0	0	0	0	14	15	15	17	16	13
	date	time	day	1	2	3	4	5	6	7	8	9	10	11	12	13	14	15	16	17	18	19	20	21	22	23	24	25	26	27	28	29	30	31	32	33	34	35	36	37	38	39	40	41	42	43	44	45	46
1	2018-11-22	1899-12-31 12:00:00	3	1	1	1	1	1	1	1	1	1	1	1	1	1	1	1	1	1	1	1	1	1	1	1	1	1	1	1	1	1	1	1	1	1	1	1	1	1	1	1	1	1	1	1	1	1	1
2	2018-11-26	1899-12-31 12:00:00	7	1	1	1	1	1	1	1	1	1	1	1	1	1	1	1	1	1	1	1	1	1	1	1	1	1	1	1	1	1	1	1	1	1	1	1	1	1	1	1	1	1	1	1	1	1	1
3	2018-11-28	1899-12-31 12:00:00	9	1	1	1	1	1	1	1	1	1	1	1	1	1	1	1	1	1	1	1	1	1	1	1	1	1	1	1	1	1	1	1	1	1	1	1	1	1	1	1	1	1	1	1	1	1	1
4	2018-11-30	1899-12-31 12:00:00	11	1	1	1	1	1	1	1	1	1	1	1	1	1	1	1	1	1	1	1	1	1	1	1	1	1	1	1	1	1	1	1	1	1	1	1	1	1	1	1	1	1	1	1	1	1	1
5	2018-12-02	1899-12-31 12:00:00	13	1	1	1	1	1	1	1	1	1	1	1	1	1	1	1	1	1	1	1	1	1	1	1	1	1	1	1	1	1	1	1	1	1	1	1	1	1	1	1	1	1	1	1	1	1	1
6	2018-12-03	1899-12-31 12:00:00	14	1	1	1	1	1	1	1	1	1	1	1	1	1	1	1	1	1	1	1	1	1	1	1	1	1	1	1	1	1	1	1	1	1	1	1	1	1	1	1	1	1	1	1	1	1	1
7	2018-12-04	1899-12-31 12:00:00	15	1	1	1	1	1	1	1	1	1	1	1	1	1	1	1	1	1	1	1	1	1	1	1	1	1	1	1	1	1	1	1	1	1	1	1	1	1	1	1	1	1	1	1	1	1	1
8	2018-12-05	1899-12-31 12:00:00	16	1	1	1	1	1	1	1	1	1	1	1	1	1	1	1	1	1	1	1	1	1	1	1	1	1	1	1	1	1	1	1	1	1	1	1	1	1	1	1	1	1	1	1	1	1	1
9	2018-12-07	1899-12-31 12:00:00	18	1	1	1	1	1	1	1	1	1	1	1	1	1	1	1	1	1	1	1	1	1	1	1	1	1	1	1	1	1	1	1	1	1	1	1	1	1	1	1	1	1	1	1	1	1	1
10	2018-12-10	1899-12-31 12:00:00	21	1	1	1	1	1	1	1	1	1	1	1	1	1	1	1	1	1	1	1	1	1	1	1	1	1	1	1	1	1	1	1	1	1	1	1	1	1	1	1	1	1	1	1	1	1	1
11	2018-12-12	1899-12-31 12:00:00	23	1	1	1	1	1	1	1	1	1	1	1	1	1	1	1	1	1	1	1	1	1	1	1	1	1	1	1	1	1	1	1	1	1	1	1	1	1	1	1	1	1	1	1	1	1	1
12	2018-12-14	1899-12-31 12:00:00	25	1	1	1	1	1	1	1	1	1	1	1	1	1	1	1	1	1	1	1	1	1	1	1	1	1	1	1	1	1	1	1	1	1	1	1	1	1	1	1	1	1	1	1	1	1	1
13	2018-12-17	1899-12-31 12:00:00	28	1	1	1	1	1	1	1	1	1	1	1	1	1	1	1	1	1	1	1	1	1	1	1	1	1	1	1	1	1	1	1	1	1	1	1	1	1	1	1	1	1	1	1	1	1	1
14	2018-12-19	1899-12-31 12:00:00	30	1	1	1	1	1	1	1	1	1	1	1	1	1	1	1	1	1	1	1	1	1	1	1	1	1	1	1	1	1	1	1	1	1	1	1	1	1	1	1	1	1	1	1	1	1	1
15	2018-12-21	1899-12-31 12:00:00	32	1	1	1	1	0.933333	1	1	1	1	1	1	1	1	1	1	1	1	1	1	1	1	1	1	1	1	1	1	1	1	1	1	1	1	1	1	1	1	1	1	1	1	1	1	1	1	1
16	2018-12-24	1899-12-31 12:00:00	35	1	1	1	1	0.866667	1	1	1	1	1	1	1	1	1	1	1	1	1	1	1	1	1	1	0.933333	1	0.933333	1	1	1	1	1	1	1	1	1	1	1	1	1	1	0.933333	1	1	1	1	1
17	2018-12-27	1899-12-31 12:00:00	38	1	1	1	1	0.866667	1	1	1	1	1	1	1	1	1	1	1	1	1	1	1	1	1	1	0.933333	1	0.933333	1	1	1	1	1	1	1	1	1	1	1	1	1	1	0.933333	1	1	1	1	1
18	2018-12-30	1899-12-31 12:00:00	41	1	1	1	1	0.866667	1	1	1	1	1	1	1	1	1	1	1	1	1	1	1	1	1	1	0.933333	1	0.933333	1	1	1	1	1	1	1	1	1	1	1	1	1	1	0.866667	1	1	1	1	1
19	2019-01-01	1899-12-31 12:00:00	43	1	1	1	1	0.866667	1	1	1	1	1	1	1	1	1	1	1	1	1	1	1	1	1	1	0.933333	1	0.933333	1	1	1	1	1	1	1	1	1	1	1	1	1	1	0.866667	1	1	1	1	1
20	2019-01-04	1899-12-31 12:00:00	46	1	1	1	1	0.866667	1	1	1	1	1	1	1	1	1	1	1	1	1	1	1	1	1	1	0.933333	1	0.866667	0.866667	1	1	1	1	1	1	1	1	1	1	1	1	1	0.866667	1	1	1	1	1
21	2019-01-07	1899-12-31 12:00:00	49	1	1	1	1	0.866667	1	0.933333	1	1	1	1	1	1	1	1	1	1	1	1	1	0.933333	1	1	0.866667	1	0.866667	0.8	1	1	1	1	1	1	1	1	1	1	1	1	1	0.866667	1	1	1	1	1
22	2019-01-09	1899-12-31 12:00:00	51	1	1	1	1	0.866667	1	0.933333	1	1	1	1	1	1	1	1	1	1	1	1	1	0.933333	0.933333	1	0.866667	1	0.866667	0.666667	1	1	1	1	1	1	1	1	1	1	1	1	1	0.866667	1	1	1	1	1
23	2019-01-11	1899-12-31 12:00:00	53	1	1	1	0.933333	0.866667	0.933333	0.933333	1	1	1	1	1	1	1	1	1	1	1	1	1	0.933333	0.933333	1	0.866667	1	0.866667	0.533333	1	1	1	1	1	1	1	1	1	1	1	1	1	0.866667	0.933333	1	1	1	1
24	2019-01-14	1899-12-31 12:00:00	56	1	1	0.928571	0.866667	0.866667	0.933333	0.933333	1	1	1	1	1	1	1	1	1	1	1	1	1	0.933333	0.733333	1	0.866667	1	0.8	0.4	1	1	1	1	1	1	1	1	1	1	1	1	1	0.866667	0.933333	1	1	0.846154	0.933333
25	2019-01-16	1899-12-31 12:00:00	58	0.933333	1	0.928571	0.8	0.8	0.866667	0.933333	1	1	1	1	1	1	1	1	1	1	1	1	1	0.933333	0.733333	1	0.866667	1	0.8	0.266667	1	1	1	1	1	1	1	1	1	1	1	1	1	0.866667	0.933333	1	1	0.846154	0.933333
26	2019-01-18	1899-12-31 12:00:00	60	0.866667	1	0.857143	0.733333	0.733333	0.866667	0.933333	1	1	1	1	1	1	1	1	1	1	1	1	1	0.933333	0.733333	1	0.8	1	0.8	0.2	1	1	1	1	1	1	1	1	1	1	1	1	1	0.733333	0.933333	1	1	0.846154	0.933333
27	2019-01-21	1899-12-31 12:00:00	63	0.866667	0.933333	0.714286	0.533333	0.66	0.866667	0.933333	1	1	1	1	1	1	1	1	1	1	1	1	1	0.866667	0.6	0.933333	0.8	1	0.666667	0.0666667	1	1	1	1	1	1	1	1	1	1	1	1	1	0.666667	0.933333	1	1	0.846154	0.866667
28	2019-01-23	1899-12-31 12:00:00	65	0.866667	0.866667	0.357143	0.4	0.66	0.733333	0.933333	1	1	1	1	1	1	1	1	1	1	1	1	1	0.733333	0.6	0.8	0.733333	0.933333	0.466667	0.0666667	1	1	1	1	1	1	1	1	1	1	1	1	1	0.6	0.8	1	1	0.769231	0.733333
29	2019-01-25	1899-12-31 12:00:00	67	0.8	0.8	0.357143	0.333333	0.586667	0.733333	0.933333	1	1	1	1	1	1	1	1	1	1	1	1	1	0.666667	0.6	0.8	0.733333	0.866667	0.4	0.0666667	1	1	1	1	1	1	1	1	1	1	1	1	1	0.533333	0.8	0.866667	0.933333	0.769231	0.733333
30	2019-01-28	1899-12-31 12:00:00	70	0.8	0.6	0.142857	0.266667	0.366667	0.6	0.866667	1	1	1	1	1	1	1	1	1	1	1	1	1	0.6	0.466667	0.8	0.6	0.8	0.266667	0.0666667	1	1	1	1	1	1	1	1	1	1	1	1	1	0.4	0.533333	0.666667	0.933333	0.384615	0.4
31	2019-01-30	1899-12-31 12:00:00	72	0.6	0.533333	0.142857	0.2	0.366667	0.4	0.8	1	1	1	1	1	1	1	1	1	1	1	1	1	0.6	0.466667	0.6	0.6	0.733333	0.266667	0.0666667	1	1	1	1	1	1	1	1	1	1	1	1	1	0.4	0.466667	0.533333	0.866667	0.230769	0.266667
32	2019-02-01	1899-12-31 12:00:00	74	0.533333	0.333333	0	0.133333	0.366667	0.2	0.733333	1	1	1	1	1	1	1	1	1	1	1	1	1	0.466667	0.4	0.466667	0.466667	0.666667	0.266667	0.0666667	1	1	1	1	1	1	1	1	1	1	1	1	1	0.4	0.4	0.466667	0.866667	0.230769	0.266667
33	2019-02-04	1899-12-31 12:00:00	77	0.333333	0.2	#DIV/0!	0.0666667	0.366667	0.133333	0.333333	1	1	1	1	1	1	1	1	1	1	1	1	1	0.2	0.266667	0.266667	0.333333	0.533333	0.0666667	0.0666667	1	1	1	1	1	1	1	1	1	1	1	1	1	0.133333	0.333333	0.333333	0.733333	0.0769231	0.2
34	2019-02-06	1899-12-31 12:00:00	79	0.333333	0.2	#DIV/0!	0.0666667	0.366667	0.133333	0.2	1	1	1	1	1	1	1	1	1	1	1	1	1	0.2	0.266667	0.2	0.266667	0.466667	0	0.0666667	1	1	1	1	1	1	1	1	1	1	1	1	1	0.133333	0.333333	0.266667	0.733333	0	0.133333
35	2019-02-08	1899-12-31 12:00:00	81	0.133333	0.133333	#DIV/0!	0.0666667	0.22	0	0.0666667	1	1	1	1	1	1	1	1	1	1	1	1	1	0	0.266667	0.2	0.133333	0.266667	#DIV/0!	0.0666667	1	1	1	1	1	1	1	1	1	1	1	1	1	0.133333	0.133333	0.2	0.533333	#DIV/0!	0.133333
36	2019-02-11	1899-12-31 12:00:00	84	0.0666667	0.0666667	#DIV/0!	0.0666667	0.22	#DIV/0!	0	1	1	1	1	1	1	1	1	1	1	1	1	1	#DIV/0!	0.2	0	0.0666667	0.0666667	#DIV/0!	0	1	1	1	1	1	1	1	1	1	1	1	1	1	0.133333	0.133333	0.133333	0.4	#DIV/0!	0.133333
37	2019-02-13	1899-12-31 12:00:00	86	0	0.0666667	#DIV/0!	0.0666667	0.146667	#DIV/0!	#DIV/0!	1	1	1	1	1	1	1	1	1	1	1	1	1	#DIV/0!	0.2	#DIV/0!	0	0.0666667	#DIV/0!	#DIV/0!	1	1	1	1	1	1	1	1	1	1	1	1	1	0.133333	0.133333	0.0666667	0.333333	#DIV/0!	0.133333
38	2019-02-15	1899-12-31 12:00:00	88	#DIV/0!	0.0666667	#DIV/0!	0.0666667	0.146667	#DIV/0!	#DIV/0!	1	1	1	1	1	1	1	1	1	1	1	1	1	#DIV/0!	0.2	#DIV/0!	#DIV/0!	0.0666667	#DIV/0!	#DIV/0!	1	1	1	1	1	1	1	1	1	1	1	1	1	0.0666667	0	0.0666667	0.266667	#DIV/0!	0.133333
39	2019-02-18	1899-12-31 12:00:00	91	#DIV/0!	0.0666667	#DIV/0!	0.0666667	0.146667	#DIV/0!	#DIV/0!	1	1	1	1	1	1	1	1	1	1	1	1	1	#DIV/0!	0.2	#DIV/0!	#DIV/0!	0	#DIV/0!	#DIV/0!	1	1	1	1	1	1	1	1	1	1	1	1	1	0.0666667	#DIV/0!	0	0.133333	#DIV/0!	0.133333
40	2019-02-20	1899-12-31 12:00:00	93	#DIV/0!	0.0666667	#DIV/0!	0.0666667	0.146667	#DIV/0!	#DIV/0!	1	1	1	1	1	1	1	1	1	1	1	1	1	#DIV/0!	0.2	#DIV/0!	#DIV/0!	#DIV/0!	#DIV/0!	#DIV/0!	1	1	1	1	1	1	1	1	1	1	1	1	1	0.0666667	#DIV/0!	#DIV/0!	0.0666667	#DIV/0!	0.133333
41	2000-02-22	1899-12-31 12:00:00	93	#DIV/0!	0.0666667	#DIV/0!	0.0666667	0.146667	#DIV/0!	#DIV/0!	1	1	1	1	1	1	1	1	1	1	1	1	1	#DIV/0!	0.2	#DIV/0!	#DIV/0!	#DIV/0!	#DIV/0!	#DIV/0!	1	1	1	1	1	1	1	1	1	1	1	1	1	0.0666667	#DIV/0!	#DIV/0!	-0.133333	#DIV/0!	0.133333
42	2000-01-01	1899-12-31 12:00:00	93	#DIV/0!	0.0666667	#DIV/0!	0.0666667	0.146667	#DIV/0!	#DIV/0!	1	1	1	1	1	1	1	1	1	1	1	1	1	#DIV/0!	0.2	#DIV/0!	#DIV/0!	#DIV/0!	#DIV/0!	#DIV/0!	1	1	1	1	1	1	1	1	1	1	1	1	1	0.0666667	#DIV/0!	#DIV/0!	-0.133333	#DIV/0!	0.133333
43	2000-01-01	1899-12-31 12:00:00	93	#DIV/0!	0.0666667	#DIV/0!	0.0666667	0.146667	#DIV/0!	#DIV/0!	1	1	1	1	1	1	1	1	1	1	1	1	1	#DIV/0!	0.2	#DIV/0!	#DIV/0!	#DIV/0!	#DIV/0!	#DIV/0!	1	1	1	1	1	1	1	1	1	1	1	1	1	0.0666667	#DIV/0!	#DIV/0!	-0.133333	#DIV/0!	0.133333
44	2000-01-01	1899-12-31 12:00:00	93	#DIV/0!	0.0666667	#DIV/0!	0.0666667	0.146667	#DIV/0!	#DIV/0!	1	1	1	1	1	1	1	1	1	1	1	1	1	#DIV/0!	0.2	#DIV/0!	#DIV/0!	#DIV/0!	#DIV/0!	#DIV/0!	1	1	1	1	1	1	1	1	1	1	1	1	1	0.0666667	#DIV/0!	#DIV/0!	-0.133333	#DIV/0!	0.133333
45	2000-01-01	1899-12-31 12:00:00	93	#DIV/0!	0.0666667	#DIV/0!	0.0666667	0.146667	#DIV/0!	#DIV/0!	1	1	1	1	1	1	1	1	1	1	1	1	1	#DIV/0!	0.2	#DIV/0!	#DIV/0!	#DIV/0!	#DIV/0!	#DIV/0!	1	1	1	1	1	1	1	1	1	1	1	1	1	0.0666667	#DIV/0!	#DIV/0!	-0.133333	#DIV/0!	0.133333
46	2000-01-01	1899-12-31 12:00:00	93	#DIV/0!	0.0666667	#DIV/0!	0.0666667	0.146667	#DIV/0!	#DIV/0!	1	1	1	1	1	1	1	1	1	1	1	1	1	#DIV/0!	0.2	#DIV/0!	#DIV/0!	#DIV/0!	#DIV/0!	#DIV/0!	1	1	1	1	1	1	1	1	1	1	1	1	1	0.0666667	#DIV/0!	#DIV/0!	-0.133333	#DIV/0!	0.133333
47	2000-01-01	1899-12-31 12:00:00	93	#DIV/0!	0.0666667	#DIV/0!	0.0666667	0.146667	#DIV/0!	#DIV/0!	1	1	1	1	1	1	1	1	1	1	1	1	1	#DIV/0!	0.2	#DIV/0!	#DIV/0!	#DIV/0!	#DIV/0!	#DIV/0!	1	1	1	1	1	1	1	1	1	1	1	1	1	0.0666667	#DIV/0!	#DIV/0!	-0.133333	#DIV/0!	0.133333
48	2000-01-01	1899-12-31 12:00:00	93	#DIV/0!	0.0666667	#DIV/0!	0.0666667	0.146667	#DIV/0!	#DIV/0!	1	1	1	1	1	1	1	1	1	1	1	1	1	#DIV/0!	0.2	#DIV/0!	#DIV/0!	#DIV/0!	#DIV/0!	#DIV/0!	1	1	1	1	1	1	1	1	1	1	1	1	1	0.0666667	#DIV/0!	#DIV/0!	-0.133333	#DIV/0!	0.133333
49	2000-01-01	1899-12-31 12:00:00	93	#DIV/0!	0.0666667	#DIV/0!	0.0666667	0.146667	#DIV/0!	#DIV/0!	1	1	1	1	1	1	1	1	1	1	1	1	1	#DIV/0!	0.2	#DIV/0!	#DIV/0!	#DIV/0!	#DIV/0!	#DIV/0!	1	1	1	1	1	1	1	1	1	1	1	1	1	0.0666667	#DIV/0!	#DIV/0!	-0.133333	#DIV/0!	0.133333
50	2000-01-01	1899-12-31 12:00:00	93	#DIV/0!	0.0666667	#DIV/0!	0.0666667	0.146667	#DIV/0!	#DIV/0!	1	1	1	1	1	1	1	1	1	1	1	1	1	#DIV/0!	0.2	#DIV/0!	#DIV/0!	#DIV/0!	#DIV/0!	#DIV/0!	1	1	1	1	1	1	1	1	1	1	1	1	1	0.0666667	#DIV/0!	#DIV/0!	-0.133333	#DIV/0!	0.133333
51	2000-01-01	1899-12-31 12:00:00	93	#DIV/0!	0.0666667	#DIV/0!	0.0666667	0.146667	#DIV/0!	#DIV/0!	1	1	1	1	1	1	1	1	1	1	1	1	1	#DIV/0!	0.2	#DIV/0!	#DIV/0!	#DIV/0!	#DIV/0!	#DIV/0!	1	1	1	1	1	1	1	1	1	1	1	1	1	0.0666667	#DIV/0!	#DIV/0!	-0.133333	#DIV/0!	0.133333
52	2000-01-01	1899-12-31 12:00:00	93	#DIV/0!	0.0666667	#DIV/0!	0.0666667	0.146667	#DIV/0!	#DIV/0!	1	1	1	1	1	1	1	1	1	1	1	1	1	#DIV/0!	0.2	#DIV/0!	#DIV/0!	#DIV/0!	#DIV/0!	#DIV/0!	1	1	1	1	1	1	1	1	1	1	1	1	1	0.0666667	#DIV/0!	#DIV/0!	-0.133333	#DIV/0!	0.133333
53	2000-01-01	1899-12-31 12:00:00	93	#DIV/0!	0.0666667	#DIV/0!	0.0666667	0.146667	#DIV/0!	#DIV/0!	1	1	1	1	1	1	1	1	1	1	1	1	1	#DIV/0!	0.2	#DIV/0!	#DIV/0!	#DIV/0!	#DIV/0!	#DIV/0!	1	1	1	1	1	1	1	1	1	1	1	1	1	0.0666667	#DIV/0!	#DIV/0!	-0.133333	#DIV/0!	0.133333
54	2000-01-01	1899-12-31 12:00:00	93	#DIV/0!	0.0666667	#DIV/0!	0.0666667	0.146667	#DIV/0!	#DIV/0!	1	1	1	1	1	1	1	1	1	1	1	1	1	#DIV/0!	0.2	#DIV/0!	#DIV/0!	#DIV/0!	#DIV/0!	#DIV/0!	1	1	1	1	1	1	1	1	1	1	1	1	1	0.0666667	#DIV/0!	#DIV/0!	-0.133333	#DIV/0!	0.133333
55	2000-01-01	1899-12-31 12:00:00	93	#DIV/0!	0.0666667	#DIV/0!	0.0666667	0.146667	#DIV/0!	#DIV/0!	1	1	1	1	1	1	1	1	1	1	1	1	1	#DIV/0!	0.2	#DIV/0!	#DIV/0!	#DIV/0!	#DIV/0!	#DIV/0!	1	1	1	1	1	1	1	1	1	1	1	1	1	0.0666667	#DIV/0!	#DIV/0!	-0.133333	#DIV/0!	0.133333
56	2000-01-01	1899-12-31 12:00:00	93	#DIV/0!	0.0666667	#DIV/0!	0.0666667	0.146667	#DIV/0!	#DIV/0!	1	1	1	1	1	1	1	1	1	1	1	1	1	#DIV/0!	0.2	#DIV/0!	#DIV/0!	#DIV/0!	#DIV/0!	#DIV/0!	1	1	1	1	1	1	1	1	1	1	1	1	1	0.0666667	#DIV/0!	#DIV/0!	-0.133333	#DIV/0!	0.133333
57	2000-01-01	1899-12-31 12:00:00	93	#DIV/0!	0.0666667	#DIV/0!	0.0666667	0.146667	#DIV/0!	#DIV/0!	1	1	1	1	1	1	1	1	1	1	1	1	1	#DIV/0!	0.2	#DIV/0!	#DIV/0!	#DIV/0!	#DIV/0!	#DIV/0!	1	1	1	1	1	1	1	1	1	1	1	1	1	0.0666667	#DIV/0!	#DIV/0!	-0.133333	#DIV/0!	0.133333
58	2000-01-01	1899-12-31 12:00:00	93	#DIV/0!	0.0666667	#DIV/0!	0.0666667	0.146667	#DIV/0!	#DIV/0!	1	1	1	1	1	1	1	1	1	1	1	1	1	#DIV/0!	0.2	#DIV/0!	#DIV/0!	#DIV/0!	#DIV/0!	#DIV/0!	1	1	1	1	1	1	1	1	1	1	1	1	1	0.0666667	#DIV/0!	#DIV/0!	-0.133333	#DIV/0!	0.133333
59	2000-01-01	1899-12-31 12:00:00	93	#DIV/0!	0.0666667	#DIV/0!	0.0666667	0.146667	#DIV/0!	#DIV/0!	1	1	1	1	1	1	1	1	1	1	1	1	1	#DIV/0!	0.2	#DIV/0!	#DIV/0!	#DIV/0!	#DIV/0!	#DIV/0!	1	1	1	1	1	1	1	1	1	1	1	1	1	0.0666667	#DIV/0!	#DIV/0!	-0.133333	#DIV/0!	0.133333
60	2000-01-01	1899-12-31 12:00:00	93	#DIV/0!	0.0666667	#DIV/0!	0.0666667	0.146667	#DIV/0!	#DIV/0!	1	1	1	1	1	1	1	1	1	1	1	1	1	#DIV/0!	0.2	#DIV/0!	#DIV/0!	#DIV/0!	#DIV/0!	#DIV/0!	1	1	1	1	1	1	1	1	1	1	1	1	1	0.0666667	#DIV/0!	#DIV/0!	-0.133333	#DIV/0!	0.133333
61	2000-01-01	1899-12-31 12:00:00	93	#DIV/0!	0.0666667	#DIV/0!	0.0666667	0.146667	#DIV/0!	#DIV/0!	1	1	1	1	1	1	1	1	1	1	1	1	1	#DIV/0!	0.2	#DIV/0!	#DIV/0!	#DIV/0!	#DIV/0!	#DIV/0!	1	1	1	1	1	1	1	1	1	1	1	1	1	0.0666667	#DIV/0!	#DIV/0!	-0.133333	#DIV/0!	0.133333
62	2000-01-01	1899-12-31 12:00:00	93	#DIV/0!	0.0666667	#DIV/0!	0.0666667	0.146667	#DIV/0!	#DIV/0!	1	1	1	1	1	1	1	1	1	1	1	1	1	#DIV/0!	0.2	#DIV/0!	#DIV/0!	#DIV/0!	#DIV/0!	#DIV/0!	1	1	1	1	1	1	1	1	1	1	1	1	1	0.0666667	#DIV/0!	#DIV/0!	-0.133333	#DIV/0!	0.133333
63	2000-01-01	1899-12-31 12:00:00	93	#DIV/0!	0.0666667	#DIV/0!	0.0666667	0.146667	#DIV/0!	#DIV/0!	1	1	1	1	1	1	1	1	1	1	1	1	1	#DIV/0!	0.2	#DIV/0!	#DIV/0!	#DIV/0!	#DIV/0!	#DIV/0!	1	1	1	1	1	1	1	1	1	1	1	1	1	0.0666667	#DIV/0!	#DIV/0!	-0.133333	#DIV/0!	0.133333
64	2000-01-01	1899-12-31 12:00:00	93	#DIV/0!	0.0666667	#DIV/0!	0.0666667	0.146667	#DIV/0!	#DIV/0!	1	1	1	1	1	1	1	1	1	1	1	1	1	#DIV/0!	0.2	#DIV/0!	#DIV/0!	#DIV/0!	#DIV/0!	#DIV/0!	1	1	1	1	1	1	1	1	1	1	1	1	1	0.0666667	#DIV/0!	#DIV/0!	-0.133333	#DIV/0!	0.133333
65	2000-01-01	1899-12-31 12:00:00	93	#DIV/0!	0.0666667	#DIV/0!	0.0666667	0.146667	#DIV/0!	#DIV/0!	1	1	1	1	1	1	1	1	1	1	1	1	1	#DIV/0!	0.2	#DIV/0!	#DIV/0!	#DIV/0!	#DIV/0!	#DIV/0!	1	1	1	1	1	1	1	1	1	1	1	1	1	0.0666667	#DIV/0!	#DIV/0!	-0.133333	#DIV/0!	0.133333
66	2000-01-01	1899-12-31 12:00:00	93	#DIV/0!	0.0666667	#DIV/0!	0.0666667	0.146667	#DIV/0!	#DIV/0!	1	1	1	1	1	1	1	1	1	1	1	1	1	#DIV/0!	0.2	#DIV/0!	#DIV/0!	#DIV/0!	#DIV/0!	#DIV/0!	1	1	1	1	1	1	1	1	1	1	1	1	1	0.0666667	#DIV/0!	#DIV/0!	-0.133333	#DIV/0!	0.133333
67	2000-01-01	1899-12-31 12:00:00	93	#DIV/0!	0.0666667	#DIV/0!	0.0666667	0.146667	#DIV/0!	#DIV/0!	1	1	1	1	1	1	1	1	1	1	1	1	1	#DIV/0!	0.2	#DIV/0!	#DIV/0!	#DIV/0!	#DIV/0!	#DIV/0!	1	1	1	1	1	1	1	1	1	1	1	1	1	0.0666667	#DIV/0!	#DIV/0!	-0.133333	#DIV/0!	0.133333
68	2000-01-01	1899-12-31 12:00:00	93	#DIV/0!	0.0666667	#DIV/0!	0.0666667	0.146667	#DIV/0!	#DIV/0!	1	1	1	1	1	1	1	1	1	1	1	1	1	#DIV/0!	0.2	#DIV/0!	#DIV/0!	#DIV/0!	#DIV/0!	#DIV/0!	1	1	1	1	1	1	1	1	1	1	1	1	1	0.0666667	#DIV/0!	#DIV/0!	-0.133333	#DIV/0!	0.133333
69	2000-01-01	1899-12-31 12:00:00	93	#DIV/0!	0.0666667	#DIV/0!	0.0666667	0.146667	#DIV/0!	#DIV/0!	1	1	1	1	1	1	1	1	1	1	1	1	1	#DIV/0!	0.2	#DIV/0!	#DIV/0!	#DIV/0!	#DIV/0!	#DIV/0!	1	1	1	1	1	1	1	1	1	1	1	1	1	0.0666667	#DIV/0!	#DIV/0!	-0.133333	#DIV/0!	0.133333
70	2000-01-01	1899-12-31 12:00:00	93	#DIV/0!	0.0666667	#DIV/0!	0.0666667	0.146667	#DIV/0!	#DIV/0!	1	1	1	1	1	1	1	1	1	1	1	1	1	#DIV/0!	0.2	#DIV/0!	#DIV/0!	#DIV/0!	#DIV/0!	#DIV/0!	1	1	1	1	1	1	1	1	1	1	1	1	1	0.0666667	#DIV/0!	#DIV/0!	-0.133333	#DIV/0!	0.133333
71	2000-01-01	1899-12-31 12:00:00	93	#DIV/0!	0.0666667	#DIV/0!	0.0666667	0.146667	#DIV/0!	#DIV/0!	1	1	1	1	1	1	1	1	1	1	1	1	1	#DIV/0!	0.2	#DIV/0!	#DIV/0!	#DIV/0!	#DIV/0!	#DIV/0!	1	1	1	1	1	1	1	1	1	1	1	1	1	0.0666667	#DIV/0!	#DIV/0!	-0.133333	#DIV/0!	0.133333
72	2000-01-01	1899-12-31 12:00:00	93	#DIV/0!	0.0666667	#DIV/0!	0.0666667	0.146667	#DIV/0!	#DIV/0!	1	1	1	1	1	1	1	1	1	1	1	1	1	#DIV/0!	0.2	#DIV/0!	#DIV/0!	#DIV/0!	#DIV/0!	#DIV/0!	1	1	1	1	1	1	1	1	1	1	1	1	1	0.0666667	#DIV/0!	#DIV/0!	-0.133333	#DIV/0!	0.133333
73	2000-01-01	1899-12-31 12:00:00	93	#DIV/0!	0.0666667	#DIV/0!	0.0666667	0.146667	#DIV/0!	#DIV/0!	1	1	1	1	1	1	1	1	1	1	1	1	1	#DIV/0!	0.2	#DIV/0!	#DIV/0!	#DIV/0!	#DIV/0!	#DIV/0!	1	1	1	1	1	1	1	1	1	1	1	1	1	0.0666667	#DIV/0!	#DIV/0!	-0.133333	#DIV/0!	0.133333
74	2000-01-01	1899-12-31 12:00:00	93	#DIV/0!	0.0666667	#DIV/0!	0.0666667	0.146667	#DIV/0!	#DIV/0!	1	1	1	1	1	1	1	1	1	1	1	1	1	#DIV/0!	0.2	#DIV/0!	#DIV/0!	#DIV/0!	#DIV/0!	#DIV/0!	1	1	1	1	1	1	1	1	1	1	1	1	1	0.0666667	#DIV/0!	#DIV/0!	-0.133333	#DIV/0!	0.133333
75	2000-01-01	1899-12-31 12:00:00	93	#DIV/0!	0.0666667	#DIV/0!	0.0666667	0.146667	#DIV/0!	#DIV/0!	1	1	1	1	1	1	1	1	1	1	1	1	1	#DIV/0!	0.2	#DIV/0!	#DIV/0!	#DIV/0!	#DIV/0!	#DIV/0!	1	1	1	1	1	1	1	1	1	1	1	1	1	0.0666667	#DIV/0!	#DIV/0!	-0.133333	#DIV/0!	0.133333
[truncated: 154 more columns]

## Sheet: log rank data
deaths
log-rank test data												at risk											Expected values
day	Insulin, uninduced	test1	PBS, uninduced	PBS, Induced	Insulin, Induced	test 2	condition g	condition h	condition i	condition j		Insulin, uninduced	test1	PBS, uninduced	PBS, Induced	Insulin, Induced	test 2	condition g	condition h	condition i	condition j		Insulin, uninduced									test1								PBS, uninduced							PBS, Induced
sum	108	108	115	126	118	100	0	0	0	0													test1	PBS, uninduced	PBS, Induced	Insulin, Induced	test 2	condition g	condition h	condition i	condition j	PBS, uninduced	PBS, Induced	Insulin, Induced	test 2	condition g	condition h	condition i	condition j	PBS, Induced	Insulin, Induced	test 2	condition g	condition h	condition i	condition j	Insulin, Induced	test 2	condition g
0	0	0	0	0	0	0	0	0	0	0		108	108	115	126	118	100	0	0	0	0		0	0	0	0	0	0	0	0	0	0	0	0	0	0	0	0	0	0	0	0	0	0	0	0	0	0	0
3	0	0	0	0	0	0	0	0	0	0		108	108	115	126	118	100	0	0	0	0		0	0	0	0	0	0	0	0	0	0	0	0	0	0	0	0	0	0	0	0	0	0	0	0	0	0	0
7	0	0	0	2	1	0	0	0	0	0		107	108	114	121	117	98	0	0	0	0		0	0	0.938596	0.477679	0	0	0	0	0	0	0.943231	0.48	0	0	0	0	0	0.970213	0.493506	0	0	0	0	0	1.52521	1.10502	2
9	0	0	0	5	0	0	0	0	0	0		107	108	114	119	116	97	0	0	0	0		0	0	2.36726	0	0	0	0	0	0	0	2.37885	0	0	0	0	0	0	2.44635	0	0	0	0	0	0	2.53191	2.75463	5
11	0	0	0	7	3	0	0	0	0	0		107	108	114	114	116	97	0	0	0	0		0	0	3.38914	1.43946	0	0	0	0	0	0	3.40541	1.44643	0	0	0	0	0	3.5	1.48696	0	0	0	0	0	4.95652	3.78199	7
13	0	0	0	10	4	0	0	0	0	0		107	108	113	107	113	97	0	0	0	0		0	0	5	1.94545	0	0	0	0	0	0	5.02326	1.95475	0	0	0	0	0	5.13636	2	0	0	0	0	0	6.80909	5.2451	10
14	0	0	0	4	2	0	0	0	0	0		107	108	113	97	109	97	0	0	0	0		0	0	2.09804	0.990741	0	0	0	0	0	0	2.10732	0.995392	0	0	0	0	0	2.15238	1.01802	0	0	0	0	0	2.82524	2	4
15	0	0	0	1	1	0	0	0	0	0		107	108	113	93	106	97	0	0	0	0		0	0	0.535	0.502347	0	0	0	0	0	0	0.537313	0.504673	0	0	0	0	0	0.548544	0.515982	0	0	0	0	0	0.934673	0.489474	1
16	0	0	0	4	4	2	0	0	0	0		107	108	113	92	105	97	0	0	0	0		0	0	2.15075	2.01887	1.04902	0	0	0	0	0	2.16	2.02817	1.05366	0	0	0	0	2.20488	2.07339	1.07619	0	0	0	0	3.73604	2.92063	4
18	0	0	0	11	2	1	0	0	0	0		107	108	113	88	101	95	0	0	0	0		0	0	6.0359	1.02885	0.529703	0	0	0	0	0	6.06122	1.03349	0.53202	0	0	0	0	6.18408	1.05607	0.543269	0	0	0	0	6.05291	5.77049	11
21	0	0	0	18	9	0	0	0	0	0		107	108	113	77	99	94	0	0	0	0		0	0	10.4674	4.67476	0	0	0	0	0	0	10.5081	4.69565	0	0	0	0	0	10.7053	4.79717	0	0	0	0	0	11.8125	8.10526	18
23	0	0	0	10	23	0	0	0	0	0		107	108	113	59	90	94	0	0	0	0		0	0	6.44578	12.4924	0	0	0	0	0	0	6.46707	12.5455	0	0	0	0	0	6.56977	12.803	0	0	0	0	0	13.0671	3.85621	10
25	0	0	0	14	11	0	0	0	0	0		107	108	113	49	67	94	0	0	0	0		0	0	9.60256	6.76437	0	0	0	0	0	0	9.63057	6.78857	0	0	0	0	0	9.76543	6.90556	0	0	0	0	0	10.5603	4.7972	14
28	0	0	0	20	22	1	0	0	0	0		107	108	113	35	56	94	0	0	0	0		0	0	15.0704	14.4417	0.532338	0	0	0	0	0	15.1049	14.4878	0.534653	0	0	0	0	15.2703	14.7101	0.545894	0	0	0	0	16.1538	5.69767	20
30	0	0	0	3	14	0	0	0	0	0		107	108	113	15	34	93	0	0	0	0		0	0	2.63115	10.6241	0	0	0	0	0	0	2.63415	10.6479	0	0	0	0	0	2.64844	10.7619	0	0	0	0	0	5.20408	0.416667	3
32	1	0	0	3	2	3	0	0	0	0		107	108	113	12	20	93	0	0	0	0		0.497674	0.486364	3.59664	2.52756	2.14	1	1	1	1	0	2.7	1.6875	1.61194	0	0	0	0	2.712	1.69925	1.64563	0	0	0	0	1.875	0.685714	3
35	1	2	1	3	5	5	0	0	0	0		106	108	113	9	18	90	0	0	0	0		1.48598	0.968037	3.68696	5.12903	3.2449	1	1	1	1	1.46606	4.61538	6	3.81818	2	2	2	2	3.70492	5.17557	3.3399	1	1	1	1	2.66667	0.727273	3
38	0	0	0	3	5	5	0	0	0	0		105	106	112	6	13	85	0	0	0	0		0	0	2.83784	4.44915	2.76316	0	0	0	0	0	2.83929	4.45378	2.77487	0	0	0	0	2.84746	4.48	2.84264	0	0	0	0	2.52632	0.527473	3
41	0	0	1	0	2	3	0	0	0	0		105	106	112	3	8	79	0	0	0	0		0	0.483871	0	1.85841	1.71196	0	0	0	0	0.486239	0	1.85965	1.71892	0	0	0	0	0.973913	2.8	2.34555	1	1	1	1	0.545455	0.109756	0
43	0	0	0	0	0	0	0	0	0	0		105	106	111	3	6	76	0	0	0	0		0	0	0	0	0	0	0	0	0	0	0	0	0	0	0	0	0	0	0	0	0	0	0	0	0	0	0
46	0	3	0	0	0	4	0	0	0	0		105	106	111	3	6	76	0	0	0	0		1.49289	0	0	0	2.32044	0	0	0	0	1.46544	2.91743	2.83929	4.07692	3	3	3	3	0	0	2.37433	0	0	0	0	0	0.151899	0
49	1	3	0	0	0	7	0	0	0	0		105	103	111	3	6	72	0	0	0	0		2.01923	0.486111	0.972222	0.945946	4.74576	1	1	1	1	1.44393	2.91509	2.83486	5.88571	3	3	3	3	0	0	4.2459	0	0	0	0	0	0.28	0
51	0	3	0	0	0	2	0	0	0	0		104	100	111	3	6	65	0	0	0	0		1.52941	0	0	0	1.23077	0	0	0	0	1.4218	2.91262	2.83019	3.0303	3	3	3	3	0	0	1.26136	0	0	0	0	0	0.0882353	0
53	2	2	1	0	0	2	0	0	0	0		104	97	111	3	6	63	0	0	0	0		2.06965	1.45116	1.94393	1.89091	2.49102	2	2	2	2	1.39904	1.94	1.8835	2.425	2	2	2	2	0.973684	0.948718	1.91379	1	1	1	1	0	0.0909091	0
56	2	6	4	1	1	11	0	0	0	0		102	95	110	3	6	61	0	0	0	0		4.14213	2.88679	2.91429	2.83333	8.13497	2	2	2	2	4.63415	6.78571	6.58416	10.3526	6	6	6	6	4.86726	4.74138	9.64912	4	4	4	4	0.666667	0.5625	1
58	4	2	0	0	1	4	0	0	0	0		100	89	106	2	5	50	0	0	0	0		3.1746	1.94175	3.92157	4.7619	5.33333	4	4	4	4	0.912821	1.95604	2.84043	3.84173	2	2	2	2	0	0.954955	2.71795	0	0	0	0	0.285714	0.153846	0
60	4	2	2	0	1	7	0	0	0	0		96	87	105	2	4	46	0	0	0	0		3.14754	2.86567	3.91837	4.8	7.43662	4	4	4	4	1.8125	1.95506	2.86813	5.88722	2	2	2	2	1.96262	2.88991	6.25828	2	2	2	2	0.333333	0.291667	0
63	7	8	5	1	1	14	0	0	0	0		91	85	103	2	3	39	0	0	0	0		7.75568	5.62887	7.82796	7.74468	14.7	7	7	7	7	5.87766	8.7931	8.69318	15.0806	8	8	8	8	5.88571	5.83019	13.7817	5	5	5	5	0.8	0.731707	1
65	10	9	6	0	0	1	0	0	0	0		84	77	98	1	2	25	0	0	0	0		9.91304	7.38462	9.88235	9.76744	8.47706	10	10	10	10	6.6	8.88462	8.77215	7.54902	9	9	9	9	5.93939	5.88	5.57724	6	6	6	6	0	0.0384615	0
67	4	3	4	0	0	5	0	0	0	0		74	68	92	1	2	24	0	0	0	0		3.64789	3.56627	3.94667	3.89474	6.79592	4	4	4	4	2.975	2.95652	2.91429	5.91304	3	3	3	3	3.95699	3.91489	7.13793	4	4	4	4	0	0.2	0
70	13	8	24	0	1	8	0	0	0	0		70	65	88	1	2	19	0	0	0	0		10.8889	16.3924	12.8169	13.6111	16.5169	13	13	13	13	13.5948	7.87879	8.73134	12.381	8	8	8	8	23.7303	24.4444	26.3178	24	24	24	24	0.333333	0.4	0
72	9	4	9	0	0	2	0	0	0	0		57	57	64	1	1	11	0	0	0	0		6.5	8.47934	8.84483	8.84483	9.22059	9	9	9	9	6.12397	3.93103	3.93103	5.02941	4	4	4	4	8.86154	8.86154	9.38667	9	9	9	9	0	0.166667	0
74	11	8	6	0	0	5	0	0	0	0		48	53	55	1	1	9	0	0	0	0		9.0297	7.92233	10.7755	10.7755	13.4737	11	11	11	11	6.87037	7.85185	7.85185	11.1129	8	8	8	8	5.89286	5.89286	9.45312	6	6	6	6	0	0.5	0
77	17	16	16	1	1	3	0	0	0	0		37	45	49	1	1	4	0	0	0	0		14.8902	14.1977	17.5263	17.5263	18.0488	17	17	17	17	15.3191	16.6304	16.6304	17.449	16	16	16	16	16.66	16.66	17.566	16	16	16	16	1	0.8	1
79	2	4	4	0	0	1	0	0	0	0		20	29	33	0	0	1	0	0	0	0		2.44898	2.26415	2	2	2.85714	2	2	2	2	3.74194	4	4	4.83333	4	4	4	4	4	4	4.85294	4	4	4	4	0	0	0
81	10	8	9	0	0	0	0	0	0	0		18	25	29	0	0	0	0	0	0	0		7.53488	7.2766	10	10	10	10	10	10	10	7.87037	8	8	8	8	8	8	8	9	9	9	9	9	9	9	0	0	0
84	4	13	5	0	0	0	0	0	0	0		8	17	20	0	0	0	0	0	0	0		5.44	2.57143	4	4	4	4	4	4	4	8.27027	13	13	13	13	13	13	13	5	5	5	5	5	5	5	0	0	0
86	3	2	2	0	0	0	0	0	0	0		4	4	15	0	0	0	0	0	0	0		2.5	1.05263	3	3	3	3	3	3	3	0.842105	2	2	2	2	2	2	2	2	2	2	2	2	2	2	0	0	0
88	0	0	4	0	0	0	0	0	0	0		1	2	13	0	0	0	0	0	0	0		0	0.285714	0	0	0	0	0	0	0	0.533333	0	0	0	0	0	0	0	4	4	4	4	4	4	4	0	0	0
91	1	2	5	0	0	0	0	0	0	0		1	2	9	0	0	0	0	0	0	0		1	0.6	1	1	1	1	1	1	1	1.27273	2	2	2	2	2	2	2	5	5	5	5	5	5	5	0	0	0
93	0	0	1	0	0	0	0	0	0	0		0	0	4	0	0	0	0	0	0	0		0	0	0	0	0	0	0	0	0	0	0	0	0	0	0	0	0	1	1	1	1	1	1	1	0	0	0
93	0	0	3	0	0	0	0	0	0	0		0	0	3	0	0	0	0	0	0	0		0	0	0	0	0	0	0	0	0	0	0	0	0	0	0	0	0	3	3	3	3	3	3	3	0	0	0
93	0	0	0	0	0	0	0	0	0	0		0	0	0	0	0	0	0	0	0	0		0	0	0	0	0	0	0	0	0	0	0	0	0	0	0	0	0	0	0	0	0	0	0	0	0	0	0
93	0	0	0	0	0	0	0	0	0	0		0	0	0	0	0	0	0	0	0	0		0	0	0	0	0	0	0	0	0	0	0	0	0	0	0	0	0	0	0	0	0	0	0	0	0	0	0
93	0	0	0	0	0	0	0	0	0	0		0	0	0	0	0	0	0	0	0	0		0	0	0	0	0	0	0	0	0	0	0	0	0	0	0	0	0	0	0	0	0	0	0	0	0	0	0
93	0	0	0	0	0	0	0	0	0	0		0	0	0	0	0	0	0	0	0	0		0	0	0	0	0	0	0	0	0	0	0	0	0	0	0	0	0	0	0	0	0	0	0	0	0	0	0
93	0	0	0	0	0	0	0	0	0	0		0	0	0	0	0	0	0	0	0	0		0	0	0	0	0	0	0	0	0	0	0	0	0	0	0	0	0	0	0	0	0	0	0	0	0	0	0
93	0	0	0	0	0	0	0	0	0	0		0	0	0	0	0	0	0	0	0	0		0	0	0	0	0	0	0	0	0	0	0	0	0	0	0	0	0	0	0	0	0	0	0	0	0	0	0
93	0	0	0	0	0	0	0	0	0	0		0	0	0	0	0	0	0	0	0	0		0	0	0	0	0	0	0	0	0	0	0	0	0	0	0	0	0	0	0	0	0	0	0	0	0	0	0
93	0	0	0	0	0	0	0	0	0	0		0	0	0	0	0	0	0	0	0	0		0	0	0	0	0	0	0	0	0	0	0	0	0	0	0	0	0	0	0	0	0	0	0	0	0	0	0
93	0	0	0	0	0	0	0	0	0	0		0	0	0	0	0	0	0	0	0	0		0	0	0	0	0	0	0	0	0	0	0	0	0	0	0	0	0	0	0	0	0	0	0	0	0	0	0
93	0	0	0	0	0	0	0	0	0	0		0	0	0	0	0	0	0	0	0	0		0	0	0	0	0	0	0	0	0	0	0	0	0	0	0	0	0	0	0	0	0	0	0	0	0	0	0
93	0	0	0	0	0	0	0	0	0	0		0	0	0	0	0	0	0	0	0	0		0	0	0	0	0	0	0	0	0	0	0	0	0	0	0	0	0	0	0	0	0	0	0	0	0	0	0
93	0	0	0	0	0	0	0	0	0	0		0	0	0	0	0	0	0	0	0	0		0	0	0	0	0	0	0	0	0	0	0	0	0	0	0	0	0	0	0	0	0	0	0	0	0	0	0
93	0	0	0	0	0	0	0	0	0	0		0	0	0	0	0	0	0	0	0	0		0	0	0	0	0	0	0	0	0	0	0	0	0	0	0	0	0	0	0	0	0	0	0	0	0	0	0
93	0	0	0	0	0	0	0	0	0	0		0	0	0	0	0	0	0	0	0	0		0	0	0	0	0	0	0	0	0	0	0	0	0	0	0	0	0	0	0	0	0	0	0	0	0	0	0
93	0	0	0	0	0	0	0	0	0	0		0	0	0	0	0	0	0	0	0	0		0	0	0	0	0	0	0	0	0	0	0	0	0	0	0	0	0	0	0	0	0	0	0	0	0	0	0
93	0	0	0	0	0	0	0	0	0	0		0	0	0	0	0	0	0	0	0	0		0	0	0	0	0	0	0	0	0	0	0	0	0	0	0	0	0	0	0	0	0	0	0	0	0	0	0
93	0	0	0	0	0	0	0	0	0	0		0	0	0	0	0	0	0	0	0	0		0	0	0	0	0	0	0	0	0	0	0	0	0	0	0	0	0	0	0	0	0	0	0	0	0	0	0
93	0	0	0	0	0	0	0	0	0	0		0	0	0	0	0	0	0	0	0	0		0	0	0	0	0	0	0	0	0	0	0	0	0	0	0	0	0	0	0	0	0	0	0	0	0	0	0
93	0	0	0	0	0	0	0	0	0	0		0	0	0	0	0	0	0	0	0	0		0	0	0	0	0	0	0	0	0	0	0	0	0	0	0	0	0	0	0	0	0	0	0	0	0	0	0
93	0	0	0	0	0	0	0	0	0	0		0	0	0	0	0	0	0	0	0	0		0	0	0	0	0	0	0	0	0	0	0	0	0	0	0	0	0	0	0	0	0	0	0	0	0	0	0
93	0	0	0	0	0	0	0	0	0	0		0	0	0	0	0	0	0	0	0	0		0	0	0	0	0	0	0	0	0	0	0	0	0	0	0	0	0	0	0	0	0	0	0	0	0	0	0
93	0	0	0	0	0	0	0	0	0	0		0	0	0	0	0	0	0	0	0	0		0	0	0	0	0	0	0	0	0	0	0	0	0	0	0	0	0	0	0	0	0	0	0	0	0	0	0
93	0	0	0	0	0	0	0	0	0	0		0	0	0	0	0	0	0	0	0	0		0	0	0	0	0	0	0	0	0	0	0	0	0	0	0	0	0	0	0	0	0	0	0	0	0	0	0
93	0	0	0	0	0	0	0	0	0	0		0	0	0	0	0	0	0	0	0	0		0	0	0	0	0	0	0	0	0	0	0	0	0	0	0	0	0	0	0	0	0	0	0	0	0	0	0
93	0	0	0	0	0	0	0	0	0	0		0	0	0	0	0	0	0	0	0	0		0	0	0	0	0	0	0	0	0	0	0	0	0	0	0	0	0	0	0	0	0	0	0	0	0	0	0
93	0	0	0	0	0	0	0	0	0	0		0	0	0	0	0	0	0	0	0	0		0	0	0	0	0	0	0	0	0	0	0	0	0	0	0	0	0	0	0	0	0	0	0	0	0	0	0
93	0	0	0	0	0	0	0	0	0	0		0	0	0	0	0	0	0	0	0	0		0	0	0	0	0	0	0	0	0	0	0	0	0	0	0	0	0	0	0	0	0	0	0	0	0	0	0
93	0	0	0	0	0	0	0	0	0	0		0	0	0	0	0	0	0	0	0	0		0	0	0	0	0	0	0	0	0	0	0	0	0	0	0	0	0	0	0	0	0	0	0	0	0	0	0
93	0	0	0	0	0	0	0	0	0	0		0	0	0	0	0	0	0	0	0	0		0	0	0	0	0	0	0	0	0	0	0	0	0	0	0	0	0	0	0	0	0	0	0	0	0	0	0
93	0	0	0	0	0	0	0	0	0	0		0	0	0	0	0	0	0	0	0	0		0	0	0	0	0	0	0	0	0	0	0	0	0	0	0	0	0	0	0	0	0	0	0	0	0	0	0
93	0	0	0	0	0	0	0	0	0	0		0	0	0	0	0	0	0	0	0	0		0	0	0	0	0	0	0	0	0	0	0	0	0	0	0	0	0	0	0	0	0	0	0	0	0	0	0
93	0	0	0	0	0	0	0	0	0	0		0	0	0	0	0	0	0	0	0	0		0	0	0	0	0	0	0	0	0	0	0	0	0	0	0	0	0	0	0	0	0	0	0	0	0	0	0
93	0	0	0	0	0	0	0	0	0	0		0	0	0	0	0	0	0	0	0	0		0	0	0	0	0	0	0	0	0	0	0	0	0	0	0	0	0	0	0	0	0	0	0	0	0	0	0
93	0	0	0	0	0	0	0	0	0	0		0	0	0	0	0	0	0	0	0	0		0	0	0	0	0	0	0	0	0	0	0	0	0	0	0	0	0	0	0	0	0	0	0	0	0	0	0
sum	106	108	112	121	116	96	0	0	0	0													101.108	89.1918	182.144	178.762	151.754	106	106	106	106	94.9336	184.424	180.814	151.892	108	108	108	108	190.071	186.795	163.833	112	112	112	112	97.202	53.4465	121
censors
day	Insulin, uninduced	test1	PBS, uninduced	PBS, Induced	Insulin, Induced	test 2	condition g	condition h	condition i	condition j
0	0	0	0	0	0	0	0	0	0	0
3	1	0	1	5	1	2	0	0	0	0
7	0	0	0	0	0	1	0	0	0	0
9	0	0	0	0	0	0	0	0	0	0
11	0	0	1	0	0	0	0	0	0	0
13	0	0	0	0	0	0	0	0	0	0
14	0	0	0	0	1	0	0	0	0	0
15	0	0	0	0	0	0	0	0	0	0
16	0	0	0	0	0	0	0	0	0	0
18	0	0	0	0	0	0	0	0	0	0
21	0	0	0	0	0	0	0	0	0	0
23	0	0	0	0	0	0	0	0	0	0
25	0	0	0	0	0	0	0	0	0	0
28	0	0	0	0	0	0	0	0	0	0
30	0	0	0	0	0	0	0	0	0	0
32	0	0	0	0	0	0	0	0	0	0
35	0	0	0	0	0	0	0	0	0	0
38	0	0	0	0	0	1	0	0	0	0
41	0	0	0	0	0	0	0	0	0	0
43	0	0	0	0	0	0	0	0	0	0
46	0	0	0	0	0	0	0	0	0	0
49	0	0	0	0	0	0	0	0	0	0
51	0	0	0	0	0	0	0	0	0	0
53	0	0	0	0	0	0	0	0	0	0
56	0	0	0	0	0	0	0	0	0	0
58	0	0	1	0	0	0	0	0	0	0
60	1	0	0	0	0	0	0	0	0	0
63	0	0	0	0	0	0	0	0	0	0
65	0	0	0	0	0	0	0	0	0	0
67	0	0	0	0	0	0	0	0	0	0
70	0	0	0	0	0	0	0	0	0	0
72	0	0	0	0	0	0	0	0	0	0
74	0	0	0	0	0	0	0	0	0	0
77	0	0	0	0	0	0	0	0	0	0
79	0	0	0	0	0	0	0	0	0	0
81	0	0	0	0	0	0	0	0	0	0
84	0	0	0	0	0	0	0	0	0	0
86	0	0	0	0	0	0	0	0	0	0
88	0	0	0	0	0	0	0	0	0	0
91	0	0	0	0	0	0	0	0	0	0
93	0	0	0	0	0	0	0	0	0	0
93	0	0	0	0	0	0	0	0	0	0
93	0	0	0	0	0	0	0	0	0	0
93	0	0	0	0	0	0	0	0	0	0
93	0	0	0	0	0	0	0	0	0	0
93	0	0	0	0	0	0	0	0	0	0
93	0	0	0	0	0	0	0	0	0	0
93	0	0	0	0	0	0	0	0	0	0
93	0	0	0	0	0	0	0	0	0	0
93	0	0	0	0	0	0	0	0	0	0
93	0	0	0	0	0	0	0	0	0	0
93	0	0	0	0	0	0	0	0	0	0
93	0	0	0	0	0	0	0	0	0	0
93	0	0	0	0	0	0	0	0	0	0
93	0	0	0	0	0	0	0	0	0	0
93	0	0	0	0	0	0	0	0	0	0
93	0	0	0	0	0	0	0	0	0	0
93	0	0	0	0	0	0	0	0	0	0
93	0	0	0	0	0	0	0	0	0	0
93	0	0	0	0	0	0	0	0	0	0
93	0	0	0	0	0	0	0	0	0	0
93	0	0	0	0	0	0	0	0	0	0
93	0	0	0	0	0	0	0	0	0	0
93	0	0	0	0	0	0	0	0	0	0
93	0	0	0	0	0	0	0	0	0	0
93	0	0	0	0	0	0	0	0	0	0
93	0	0	0	0	0	0	0	0	0	0
93	0	0	0	0	0	0	0	0	0	0
93	0	0	0	0	0	0	0	0	0	0
93	0	0	0	0	0	0	0	0	0	0
93	0	0	0	0	0	0	0	0	0	0
93	0	0	0	0	0	0	0	0	0	0
93	0	0	0	0	0	0	0	0	0	0
93	0	0	0	0	0	0	0	0	0	0
93	0	0	0	0	0	0	0	0	0	0
93	0	0	0	0	0	0	0	0	0	0
[truncated: 63 more columns]

## Sheet: mort data
					deaths
																Nx	number of survivors											proportion of survivors												Ux	negative log of proportion of daily survivors
	count			day	Insulin, uninduced	test1	PBS, uninduced	PBS, Induced	Insulin, Induced	test 2	condition g	condition h	condition i	condition j		day	Insulin, uninduced	test1	PBS, uninduced	PBS, Induced	Insulin, Induced	test 2	condition g	condition h	condition i	condition j		day	Insulin, uninduced	test1	PBS, uninduced	PBS, Induced	Insulin, Induced	test 2	condition g	condition h	condition i	condition j		day	Insulin, uninduced	test1	PBS, uninduced	PBS, Induced	Insulin, Induced	test 2	condition g	condition h	condition i
	date	time														est 0	108	108	115	126	118	100	100	100	100	100
0	2018-11-19	1899-12-31 12:00:00		0													108	108	115	126	118	100	0	0	0	0		0	1	1	1	1	1	1	1	1	1	1		0	0	0	0	0	0	0	0	0	0
1	2018-11-22	1899-12-31 12:00:00		3	0	0	0	0	0	0	0	0	0	0		3	107	108	114	121	117	98	100	100	100	100		3	1	1	1	1	1	1	1	1	1	1		3	0	0	0	0	0	0	0	0	0
2	2018-11-26	1899-12-31 12:00:00		7	0	0	0	2	1	0	0	0	0	0		7	107	108	114	119	116	97	100	100	100	100		7	1	1	1	0.983471	0.991453	1	1	1	1	1		7	0	0	0	0.0166671	0.00858374	0	0	0	0
3	2018-11-28	1899-12-31 12:00:00		9	0	0	0	5	0	0	0	0	0	0		9	107	108	114	114	116	97	100	100	100	100		9	1	1	1	0.942149	0.991453	1	1	1	1	1		9	0	0	0	0.042925	0	0	0	0	0
4	2018-11-30	1899-12-31 12:00:00		11	0	0	0	7	3	0	0	0	0	0		11	107	108	113	107	113	97	100	100	100	100		11	1	1	1	0.884298	0.965812	1	1	1	1	1		11	0	0	0	0.0633696	0.0262024	0	0	0	0
5	2018-12-02	1899-12-31 12:00:00		13	0	0	0	10	4	0	0	0	0	0		13	107	108	113	97	109	97	100	100	100	100		13	1	1	1	0.801653	0.931624	1	1	1	1	1		13	0	0	0	0.0981179	0.0360399	0	0	0	0
6	2018-12-03	1899-12-31 12:00:00		14	0	0	0	4	2	0	0	0	0	0		14	107	108	113	93	106	97	100	100	100	100		14	1	1	1	0.768595	0.91453	1	1	1	1	1		14	0	0	0	0.0421115	0.018519	0	0	0	0
7	2018-12-04	1899-12-31 12:00:00		15	0	0	0	1	1	0	0	0	0	0		15	107	108	113	92	105	97	100	100	100	100		15	1	1	1	0.760331	0.905902	1	1	1	1	1		15	0	0	0	0.0108109	0.00947874	0	0	0	0
8	2018-12-05	1899-12-31 12:00:00		16	0	0	0	4	4	2	0	0	0	0		16	107	108	113	88	101	95	100	100	100	100		16	1	1	1	0.727273	0.871392	0.979381	1	1	1	1		16	0	0	0	0.0444518	0.0388398	0.0208341	0	0	0
9	2018-12-07	1899-12-31 12:00:00		18	0	0	0	11	2	1	0	0	0	0		18	107	108	113	77	99	94	100	100	100	100		18	1	1	1	0.636364	0.854136	0.969072	1	1	1	1		18	0	0	0	0.133531	0.0200007	0.0105821	0	0	0
10	2018-12-10	1899-12-31 12:00:00		21	0	0	0	18	9	0	0	0	0	0		21	107	108	113	59	90	94	100	100	100	100		21	1	1	1	0.487603	0.776488	0.969072	1	1	1	1		21	0	0	0	0.266268	0.0953102	0	0	0	0
11	2018-12-12	1899-12-31 12:00:00		23	0	0	0	10	23	0	0	0	0	0		23	107	108	113	49	67	94	100	100	100	100		23	1	1	1	0.404959	0.578052	0.969072	1	1	1	1		23	0	0	0	0.185717	0.295117	0	0	0	0
12	2018-12-14	1899-12-31 12:00:00		25	0	0	0	14	11	0	0	0	0	0		25	107	108	113	35	56	94	100	100	100	100		25	1	1	1	0.289256	0.483148	0.969072	1	1	1	1		25	0	0	0	0.336472	0.179341	0	0	0	0
13	2018-12-17	1899-12-31 12:00:00		28	0	0	0	20	22	1	0	0	0	0		28	107	108	113	15	34	93	100	100	100	100		28	1	1	1	0.123967	0.29334	0.958763	1	1	1	1		28	0	0	0	0.847298	0.498991	0.0106953	0	0	0
14	2018-12-19	1899-12-31 12:00:00		30	0	0	0	3	14	0	0	0	0	0		30	107	108	113	12	20	93	100	100	100	100		30	1	1	1	0.0991736	0.172553	0.958763	1	1	1	1		30	0	0	0	0.223144	0.530628	0	0	0	0
15	2018-12-21	1899-12-31 12:00:00		32	1	0	0	3	2	3	0	0	0	0		32	106	108	113	9	18	90	100	100	100	100		32	0.990654	1	1	0.0743802	0.155298	0.927835	1	1	1	1		32	0.00938974	0	0	0.287682	0.105361	0.0327898	0	0	0
16	2018-12-24	1899-12-31 12:00:00		35	1	2	1	3	5	5	0	0	0	0		35	105	106	112	6	13	85	100	100	100	100		35	0.981308	0.981481	0.99115	0.0495868	0.112159	0.876289	1	1	1	1		35	0.00947874	0.0186921	0.00888895	0.405465	0.325422	0.0571584	0	0	0
17	2018-12-27	1899-12-31 12:00:00		38	0	0	0	3	5	5	0	0	0	0		38	105	106	112	3	8	79	100	100	100	100		38	0.981308	0.981481	0.99115	0.0247934	0.0690211	0.824742	1	1	1	1		38	0	0	0	0.693147	0.485508	0.0606246	0	0	0
18	2018-12-30	1899-12-31 12:00:00		41	0	0	1	0	2	3	0	0	0	0		41	105	106	111	3	6	76	100	100	100	100		41	0.981308	0.981481	0.982301	0.0247934	0.0517658	0.793423	1	1	1	1		41	0	0	0.00896867	0	0.287682	0.0387145	0	0	0
19	2019-01-01	1899-12-31 12:00:00		43	0	0	0	0	0	0	0	0	0	0		43	105	106	111	3	6	76	100	100	100	100		43	0.981308	0.981481	0.982301	0.0247934	0.0517658	0.793423	1	1	1	1		43	0	0	0	0	0	0	0	0	0
20	2019-01-04	1899-12-31 12:00:00		46	0	3	0	0	0	4	0	0	0	0		46	105	103	111	3	6	72	100	100	100	100		46	0.981308	0.953704	0.982301	0.0247934	0.0517658	0.751664	1	1	1	1		46	0	0.0287101	0	0	0	0.0540672	0	0	0
21	2019-01-07	1899-12-31 12:00:00		49	1	3	0	0	0	7	0	0	0	0		49	104	100	111	3	6	65	100	100	100	100		49	0.971963	0.925926	0.982301	0.0247934	0.0517658	0.678585	1	1	1	1		49	0.00956945	0.0295588	0	0	0	0.102279	0	0	0
22	2019-01-09	1899-12-31 12:00:00		51	0	3	0	0	0	2	0	0	0	0		51	104	97	111	3	6	63	100	100	100	100		51	0.971963	0.898148	0.982301	0.0247934	0.0517658	0.657706	1	1	1	1		51	0	0.0304592	0	0	0	0.0312525	0	0	0
23	2019-01-11	1899-12-31 12:00:00		53	2	2	1	0	0	2	0	0	0	0		53	102	95	110	3	6	61	100	100	100	100		53	0.953271	0.87963	0.973451	0.0247934	0.0517658	0.636826	1	1	1	1		53	0.0194181	0.0208341	0.00904984	0	0	0.0322609	0	0	0
24	2019-01-14	1899-12-31 12:00:00		56	2	6	4	1	1	11	0	0	0	0		56	100	89	106	2	5	50	100	100	100	100		56	0.934579	0.824074	0.938053	0.0165289	0.0431382	0.521989	1	1	1	1		56	0.0198026	0.0652405	0.0370413	0.405465	0.182322	0.198851	0	0	0
25	2019-01-16	1899-12-31 12:00:00		58	4	2	0	0	1	4	0	0	0	0		58	96	87	105	2	4	46	100	100	100	100		58	0.897196	0.805556	0.938053	0.0165289	0.0345106	0.48023	1	1	1	1		58	0.040822	0.0227283	0	0	0.223144	0.0833816	0	0	0
26	2019-01-18	1899-12-31 12:00:00		60	4	2	2	0	1	7	0	0	0	0		60	91	85	103	2	3	39	100	100	100	100		60	0.859813	0.787037	0.920185	0.0165289	0.0258829	0.407151	1	1	1	1		60	0.0425596	0.0232569	0.0192314	0	0.287682	0.16508	0	0	0
27	2019-01-21	1899-12-31 12:00:00		63	7	8	5	1	1	14	0	0	0	0		63	84	77	98	1	2	25	100	100	100	100		63	0.793674	0.712963	0.875516	0.00826446	0.0172553	0.260994	1	1	1	1		63	0.0800427	0.0988458	0.0497615	0.693147	0.405465	0.444686	0	0	0
28	2019-01-23	1899-12-31 12:00:00		65	10	9	6	0	0	1	0	0	0	0		65	74	68	92	1	2	24	100	100	100	100		65	0.699189	0.62963	0.821913	0.00826446	0.0172553	0.250555	1	1	1	1		65	0.126752	0.124298	0.0631789	0	0	0.040822	0	0	0
29	2019-01-25	1899-12-31 12:00:00		67	4	3	4	0	0	5	0	0	0	0		67	70	65	88	1	2	19	100	100	100	100		67	0.661395	0.601852	0.786178	0.00826446	0.0172553	0.198356	1	1	1	1		67	0.0555699	0.0451204	0.0444518	0	0	0.233615	0	0	0
30	2019-01-28	1899-12-31 12:00:00		70	13	8	24	0	1	8	0	0	0	0		70	57	57	64	1	1	11	100	100	100	100		70	0.538564	0.527778	0.571766	0.00826446	0.00862764	0.114838	1	1	1	1		70	0.205444	0.131336	0.318454	0	0.693147	0.546544	0	0	0
31	2019-01-30	1899-12-31 12:00:00		72	9	4	9	0	0	2	0	0	0	0		72	48	53	55	1	1	9	100	100	100	100		72	0.453528	0.490741	0.491361	0.00826446	0.00862764	0.093958	1	1	1	1		72	0.17185	0.0727594	0.15155	0	0	0.200671	0	0	0
32	2019-02-01	1899-12-31 12:00:00		74	11	8	6	0	0	5	0	0	0	0		74	37	45	49	1	1	4	100	100	100	100		74	0.349594	0.416667	0.437758	0.00826446	0.00862764	0.0417591	1	1	1	1		74	0.260283	0.163629	0.115513	0	0	0.81093	0	0	0
33	2019-02-04	1899-12-31 12:00:00		77	17	16	16	1	1	3	0	0	0	0		77	20	29	33	0	0	1	100	100	100	100		77	0.18897	0.268519	0.294817	0	0	0.0104398	1	1	1	1		77	0.615186	0.439367	0.395313	#NUM!	#NUM!	1.38629	0	0	0
34	2019-02-06	1899-12-31 12:00:00		79	2	4	4	0	0	1	0	0	0	0		79	18	25	29	0	0	0	100	100	100	100		79	0.170073	0.231481	0.259081	#DIV/0!	#DIV/0!	0	1	1	1	1		79	0.105361	0.14842	0.129212	#DIV/0!	#DIV/0!	#NUM!	0	0	0
35	2019-02-08	1899-12-31 12:00:00		81	10	8	9	0	0	0	0	0	0	0		81	8	17	20	0	0	0	100	100	100	100		81	0.075588	0.157407	0.178677	#DIV/0!	#DIV/0!	#DIV/0!	1	1	1	1		81	0.81093	0.385662	0.371564	#DIV/0!	#DIV/0!	#DIV/0!	0	0	0
36	2019-02-11	1899-12-31 12:00:00		84	4	13	5	0	0	0	0	0	0	0		84	4	4	15	0	0	0	100	100	100	100		84	0.037794	0.037037	0.134008	#DIV/0!	#DIV/0!	#DIV/0!	1	1	1	1		84	0.693147	1.44692	0.287682	#DIV/0!	#DIV/0!	#DIV/0!	0	0	0
37	2019-02-13	1899-12-31 12:00:00		86	3	2	2	0	0	0	0	0	0	0		86	1	2	13	0	0	0	100	100	100	100		86	0.0094485	0.0185185	0.11614	#DIV/0!	#DIV/0!	#DIV/0!	1	1	1	1		86	1.38629	0.693147	0.143101	#DIV/0!	#DIV/0!	#DIV/0!	0	0	0
38	2019-02-15	1899-12-31 12:00:00		88	0	0	4	0	0	0	0	0	0	0		88	1	2	9	0	0	0	100	100	100	100		88	0.0094485	0.0185185	0.0804046	#DIV/0!	#DIV/0!	#DIV/0!	1	1	1	1		88	0	0	0.367725	#DIV/0!	#DIV/0!	#DIV/0!	0	0	0
39	2019-02-18	1899-12-31 12:00:00		91	1	2	5	0	0	0	0	0	0	0		91	0	0	4	0	0	0	100	100	100	100		91	0	0	0.0357354	#DIV/0!	#DIV/0!	#DIV/0!	1	1	1	1		91	#NUM!	#NUM!	0.81093	#DIV/0!	#DIV/0!	#DIV/0!	0	0	0
40	2019-02-20	1899-12-31 12:00:00		93	0	0	1	0	0	0	0	0	0	0		93	0	0	3	0	0	0	100	100	100	100		93	#DIV/0!	#DIV/0!	0.0268015	#DIV/0!	#DIV/0!	#DIV/0!	1	1	1	1		93	#DIV/0!	#DIV/0!	0.287682	#DIV/0!	#DIV/0!	#DIV/0!	0	0	0
41	2000-02-22	1899-12-31 12:00:00		93	0	0	3	0	0	0	0	0	0	0		93	0	0	0	0	0	0	100	100	100	100		93	#DIV/0!	#DIV/0!	0	#DIV/0!	#DIV/0!	#DIV/0!	1	1	1	1		93	#DIV/0!	#DIV/0!	#NUM!	#DIV/0!	#DIV/0!	#DIV/0!	0	0	0
42	2000-01-01	1899-12-31 12:00:00		93	0	0	0	0	0	0	0	0	0	0		93	0	0	0	0	0	0	100	100	100	100		93	#DIV/0!	#DIV/0!	#DIV/0!	#DIV/0!	#DIV/0!	#DIV/0!	1	1	1	1		93	#DIV/0!	#DIV/0!	#DIV/0!	#DIV/0!	#DIV/0!	#DIV/0!	0	0	0
43	2000-01-01	1899-12-31 12:00:00		93	0	0	0	0	0	0	0	0	0	0		93	0	0	0	0	0	0	100	100	100	100		93	#DIV/0!	#DIV/0!	#DIV/0!	#DIV/0!	#DIV/0!	#DIV/0!	1	1	1	1		93	#DIV/0!	#DIV/0!	#DIV/0!	#DIV/0!	#DIV/0!	#DIV/0!	0	0	0
44	2000-01-01	1899-12-31 12:00:00		93	0	0	0	0	0	0	0	0	0	0		93	0	0	0	0	0	0	100	100	100	100		93	#DIV/0!	#DIV/0!	#DIV/0!	#DIV/0!	#DIV/0!	#DIV/0!	1	1	1	1		93	#DIV/0!	#DIV/0!	#DIV/0!	#DIV/0!	#DIV/0!	#DIV/0!	0	0	0
45	2000-01-01	1899-12-31 12:00:00		93	0	0	0	0	0	0	0	0	0	0		93	0	0	0	0	0	0	100	100	100	100		93	#DIV/0!	#DIV/0!	#DIV/0!	#DIV/0!	#DIV/0!	#DIV/0!	1	1	1	1		93	#DIV/0!	#DIV/0!	#DIV/0!	#DIV/0!	#DIV/0!	#DIV/0!	0	0	0
46	2000-01-01	1899-12-31 12:00:00		93	0	0	0	0	0	0	0	0	0	0		93	0	0	0	0	0	0	100	100	100	100		93	#DIV/0!	#DIV/0!	#DIV/0!	#DIV/0!	#DIV/0!	#DIV/0!	1	1	1	1		93	#DIV/0!	#DIV/0!	#DIV/0!	#DIV/0!	#DIV/0!	#DIV/0!	0	0	0
47	2000-01-01	1899-12-31 12:00:00		93	0	0	0	0	0	0	0	0	0	0		93	0	0	0	0	0	0	100	100	100	100		93	#DIV/0!	#DIV/0!	#DIV/0!	#DIV/0!	#DIV/0!	#DIV/0!	1	1	1	1		93	#DIV/0!	#DIV/0!	#DIV/0!	#DIV/0!	#DIV/0!	#DIV/0!	0	0	0
48	2000-01-01	1899-12-31 12:00:00		93	0	0	0	0	0	0	0	0	0	0		93	0	0	0	0	0	0	100	100	100	100		93	#DIV/0!	#DIV/0!	#DIV/0!	#DIV/0!	#DIV/0!	#DIV/0!	1	1	1	1		93	#DIV/0!	#DIV/0!	#DIV/0!	#DIV/0!	#DIV/0!	#DIV/0!	0	0	0
49	2000-01-01	1899-12-31 12:00:00		93	0	0	0	0	0	0	0	0	0	0		93	0	0	0	0	0	0	100	100	100	100		93	#DIV/0!	#DIV/0!	#DIV/0!	#DIV/0!	#DIV/0!	#DIV/0!	1	1	1	1		93	#DIV/0!	#DIV/0!	#DIV/0!	#DIV/0!	#DIV/0!	#DIV/0!	0	0	0
50	2000-01-01	1899-12-31 12:00:00		93	0	0	0	0	0	0	0	0	0	0		93	0	0	0	0	0	0	100	100	100	100		93	#DIV/0!	#DIV/0!	#DIV/0!	#DIV/0!	#DIV/0!	#DIV/0!	1	1	1	1		93	#DIV/0!	#DIV/0!	#DIV/0!	#DIV/0!	#DIV/0!	#DIV/0!	0	0	0
51	2000-01-01	1899-12-31 12:00:00		93	0	0	0	0	0	0	0	0	0	0		93	0	0	0	0	0	0	100	100	100	100		93	#DIV/0!	#DIV/0!	#DIV/0!	#DIV/0!	#DIV/0!	#DIV/0!	1	1	1	1		93	#DIV/0!	#DIV/0!	#DIV/0!	#DIV/0!	#DIV/0!	#DIV/0!	0	0	0
52	2000-01-01	1899-12-31 12:00:00		93	0	0	0	0	0	0	0	0	0	0		93	0	0	0	0	0	0	100	100	100	100		93	#DIV/0!	#DIV/0!	#DIV/0!	#DIV/0!	#DIV/0!	#DIV/0!	1	1	1	1		93	#DIV/0!	#DIV/0!	#DIV/0!	#DIV/0!	#DIV/0!	#DIV/0!	0	0	0
53	2000-01-01	1899-12-31 12:00:00		93	0	0	0	0	0	0	0	0	0	0		93	0	0	0	0	0	0	100	100	100	100		93	#DIV/0!	#DIV/0!	#DIV/0!	#DIV/0!	#DIV/0!	#DIV/0!	1	1	1	1		93	#DIV/0!	#DIV/0!	#DIV/0!	#DIV/0!	#DIV/0!	#DIV/0!	0	0	0
54	2000-01-01	1899-12-31 12:00:00		93	0	0	0	0	0	0	0	0	0	0		93	0	0	0	0	0	0	100	100	100	100		93	#DIV/0!	#DIV/0!	#DIV/0!	#DIV/0!	#DIV/0!	#DIV/0!	1	1	1	1		93	#DIV/0!	#DIV/0!	#DIV/0!	#DIV/0!	#DIV/0!	#DIV/0!	0	0	0
55	2000-01-01	1899-12-31 12:00:00		93	0	0	0	0	0	0	0	0	0	0		93	0	0	0	0	0	0	100	100	100	100		93	#DIV/0!	#DIV/0!	#DIV/0!	#DIV/0!	#DIV/0!	#DIV/0!	1	1	1	1		93	#DIV/0!	#DIV/0!	#DIV/0!	#DIV/0!	#DIV/0!	#DIV/0!	0	0	0
56	2000-01-01	1899-12-31 12:00:00		93	0	0	0	0	0	0	0	0	0	0		93	0	0	0	0	0	0	100	100	100	100		93	#DIV/0!	#DIV/0!	#DIV/0!	#DIV/0!	#DIV/0!	#DIV/0!	1	1	1	1		93	#DIV/0!	#DIV/0!	#DIV/0!	#DIV/0!	#DIV/0!	#DIV/0!	0	0	0
57	2000-01-01	1899-12-31 12:00:00		93	0	0	0	0	0	0	0	0	0	0		93	0	0	0	0	0	0	100	100	100	100		93	#DIV/0!	#DIV/0!	#DIV/0!	#DIV/0!	#DIV/0!	#DIV/0!	1	1	1	1		93	#DIV/0!	#DIV/0!	#DIV/0!	#DIV/0!	#DIV/0!	#DIV/0!	0	0	0
58	2000-01-01	1899-12-31 12:00:00		93	0	0	0	0	0	0	0	0	0	0		93	0	0	0	0	0	0	100	100	100	100		93	#DIV/0!	#DIV/0!	#DIV/0!	#DIV/0!	#DIV/0!	#DIV/0!	1	1	1	1		93	#DIV/0!	#DIV/0!	#DIV/0!	#DIV/0!	#DIV/0!	#DIV/0!	0	0	0
59	2000-01-01	1899-12-31 12:00:00		93	0	0	0	0	0	0	0	0	0	0		93	0	0	0	0	0	0	100	100	100	100		93	#DIV/0!	#DIV/0!	#DIV/0!	#DIV/0!	#DIV/0!	#DIV/0!	1	1	1	1		93	#DIV/0!	#DIV/0!	#DIV/0!	#DIV/0!	#DIV/0!	#DIV/0!	0	0	0
60	2000-01-01	1899-12-31 12:00:00		93	0	0	0	0	0	0	0	0	0	0		93	0	0	0	0	0	0	100	100	100	100		93	#DIV/0!	#DIV/0!	#DIV/0!	#DIV/0!	#DIV/0!	#DIV/0!	1	1	1	1		93	#DIV/0!	#DIV/0!	#DIV/0!	#DIV/0!	#DIV/0!	#DIV/0!	0	0	0
61	2000-01-01	1899-12-31 12:00:00		93	0	0	0	0	0	0	0	0	0	0		93	0	0	0	0	0	0	100	100	100	100		93	#DIV/0!	#DIV/0!	#DIV/0!	#DIV/0!	#DIV/0!	#DIV/0!	1	1	1	1		93	#DIV/0!	#DIV/0!	#DIV/0!	#DIV/0!	#DIV/0!	#DIV/0!	0	0	0
62	2000-01-01	1899-12-31 12:00:00		93	0	0	0	0	0	0	0	0	0	0		93	0	0	0	0	0	0	100	100	100	100		93	#DIV/0!	#DIV/0!	#DIV/0!	#DIV/0!	#DIV/0!	#DIV/0!	1	1	1	1		93	#DIV/0!	#DIV/0!	#DIV/0!	#DIV/0!	#DIV/0!	#DIV/0!	0	0	0
63	2000-01-01	1899-12-31 12:00:00		93	0	0	0	0	0	0	0	0	0	0		93	0	0	0	0	0	0	100	100	100	100		93	#DIV/0!	#DIV/0!	#DIV/0!	#DIV/0!	#DIV/0!	#DIV/0!	1	1	1	1		93	#DIV/0!	#DIV/0!	#DIV/0!	#DIV/0!	#DIV/0!	#DIV/0!	0	0	0
64	2000-01-01	1899-12-31 12:00:00		93	0	0	0	0	0	0	0	0	0	0		93	0	0	0	0	0	0	100	100	100	100		93	#DIV/0!	#DIV/0!	#DIV/0!	#DIV/0!	#DIV/0!	#DIV/0!	1	1	1	1		93	#DIV/0!	#DIV/0!	#DIV/0!	#DIV/0!	#DIV/0!	#DIV/0!	0	0	0
65	2000-01-01	1899-12-31 12:00:00		93	0	0	0	0	0	0	0	0	0	0		93	0	0	0	0	0	0	100	100	100	100		93	#DIV/0!	#DIV/0!	#DIV/0!	#DIV/0!	#DIV/0!	#DIV/0!	1	1	1	1		93	#DIV/0!	#DIV/0!	#DIV/0!	#DIV/0!	#DIV/0!	#DIV/0!	0	0	0
66	2000-01-01	1899-12-31 12:00:00		93	0	0	0	0	0	0	0	0	0	0		93	0	0	0	0	0	0	100	100	100	100		93	#DIV/0!	#DIV/0!	#DIV/0!	#DIV/0!	#DIV/0!	#DIV/0!	1	1	1	1		93	#DIV/0!	#DIV/0!	#DIV/0!	#DIV/0!	#DIV/0!	#DIV/0!	0	0	0
67	2000-01-01	1899-12-31 12:00:00		93	0	0	0	0	0	0	0	0	0	0		93	0	0	0	0	0	0	100	100	100	100		93	#DIV/0!	#DIV/0!	#DIV/0!	#DIV/0!	#DIV/0!	#DIV/0!	1	1	1	1		93	#DIV/0!	#DIV/0!	#DIV/0!	#DIV/0!	#DIV/0!	#DIV/0!	0	0	0
68	2000-01-01	1899-12-31 12:00:00		93	0	0	0	0	0	0	0	0	0	0		93	0	0	0	0	0	0	100	100	100	100		93	#DIV/0!	#DIV/0!	#DIV/0!	#DIV/0!	#DIV/0!	#DIV/0!	1	1	1	1		93	#DIV/0!	#DIV/0!	#DIV/0!	#DIV/0!	#DIV/0!	#DIV/0!	0	0	0
69	2000-01-01	1899-12-31 12:00:00		93	0	0	0	0	0	0	0	0	0	0		93	0	0	0	0	0	0	100	100	100	100		93	#DIV/0!	#DIV/0!	#DIV/0!	#DIV/0!	#DIV/0!	#DIV/0!	1	1	1	1		93	#DIV/0!	#DIV/0!	#DIV/0!	#DIV/0!	#DIV/0!	#DIV/0!	0	0	0
70	2000-01-01	1899-12-31 12:00:00		93	0	0	0	0	0	0	0	0	0	0		93	0	0	0	0	0	0	100	100	100	100		93	#DIV/0!	#DIV/0!	#DIV/0!	#DIV/0!	#DIV/0!	#DIV/0!	1	1	1	1		93	#DIV/0!	#DIV/0!	#DIV/0!	#DIV/0!	#DIV/0!	#DIV/0!	0	0	0
71	2000-01-01	1899-12-31 12:00:00		93	0	0	0	0	0	0	0	0	0	0		93	0	0	0	0	0	0	100	100	100	100		93	#DIV/0!	#DIV/0!	#DIV/0!	#DIV/0!	#DIV/0!	#DIV/0!	1	1	1	1		93	#DIV/0!	#DIV/0!	#DIV/0!	#DIV/0!	#DIV/0!	#DIV/0!	0	0	0
72	2000-01-01	1899-12-31 12:00:00		93	0	0	0	0	0	0	0	0	0	0		93	0	0	0	0	0	0	100	100	100	100		93	#DIV/0!	#DIV/0!	#DIV/0!	#DIV/0!	#DIV/0!	#DIV/0!	1	1	1	1		93	#DIV/0!	#DIV/0!	#DIV/0!	#DIV/0!	#DIV/0!	#DIV/0!	0	0	0
73	2000-01-01	1899-12-31 12:00:00		93	0	0	0	0	0	0	0	0	0	0		93	0	0	0	0	0	0	100	100	100	100		93	#DIV/0!	#DIV/0!	#DIV/0!	#DIV/0!	#DIV/0!	#DIV/0!	1	1	1	1		93	#DIV/0!	#DIV/0!	#DIV/0!	#DIV/0!	#DIV/0!	#DIV/0!	0	0	0
74	2000-01-01	1899-12-31 12:00:00		93	0	0	0	0	0	0	0	0	0	0		93	0	0	0	0	0	0	100	100	100	100		93	#DIV/0!	#DIV/0!	#DIV/0!	#DIV/0!	#DIV/0!	#DIV/0!	1	1	1	1		93	#DIV/0!	#DIV/0!	#DIV/0!	#DIV/0!	#DIV/0!	#DIV/0!	0	0	0
75	2000-01-01	1899-12-31 12:00:00		93	0	0	0	0	0	0	0	0	0	0		93	0	0	0	0	0	0	100	100	100	100		93	#DIV/0!	#DIV/0!	#DIV/0!	#DIV/0!	#DIV/0!	#DIV/0!	1	1	1	1		93	#DIV/0!	#DIV/0!	#DIV/0!	#DIV/0!	#DIV/0!	#DIV/0!	0	0	0
				censors
				day	Insulin, uninduced	test1	PBS, uninduced	PBS, Induced	Insulin, Induced	test 2	condition g	condition h	condition i	condition j
	2018-11-19	1899-12-31 12:00:00		0	0	0	0	0	0	0	0	0	0	0
1	2018-11-22	1899-12-31 12:00:00		3	1	0	1	5	1	2	0	0	0	0
2	2018-11-26	1899-12-31 12:00:00		7	0	0	0	0	0	1	0	0	0	0
3	2018-11-28	1899-12-31 12:00:00		9	0	0	0	0	0	0	0	0	0	0
4	2018-11-30	1899-12-31 12:00:00		11	0	0	1	0	0	0	0	0	0	0
5	2018-12-02	1899-12-31 12:00:00		13	0	0	0	0	0	0	0	0	0	0
6	2018-12-03	1899-12-31 12:00:00		14	0	0	0	0	1	0	0	0	0	0
7	2018-12-04	1899-12-31 12:00:00		15	0	0	0	0	0	0	0	0	0	0
8	2018-12-05	1899-12-31 12:00:00		16	0	0	0	0	0	0	0	0	0	0
9	2018-12-07	1899-12-31 12:00:00		18	0	0	0	0	0	0	0	0	0	0
10	2018-12-10	1899-12-31 12:00:00		21	0	0	0	0	0	0	0	0	0	0
11	2018-12-12	1899-12-31 12:00:00		23	0	0	0	0	0	0	0	0	0	0
12	2018-12-14	1899-12-31 12:00:00		25	0	0	0	0	0	0	0	0	0	0
13	2018-12-17	1899-12-31 12:00:00		28	0	0	0	0	0	0	0	0	0	0
14	2018-12-19	1899-12-31 12:00:00		30	0	0	0	0	0	0	0	0	0	0
15	2018-12-21	1899-12-31 12:00:00		32	0	0	0	0	0	0	0	0	0	0
16	2018-12-24	1899-12-31 12:00:00		35	0	0	0	0	0	0	0	0	0	0
17	2018-12-27	1899-12-31 12:00:00		38	0	0	0	0	0	1	0	0	0	0
18	2018-12-30	1899-12-31 12:00:00		41	0	0	0	0	0	0	0	0	0	0
19	2019-01-01	1899-12-31 12:00:00		43	0	0	0	0	0	0	0	0	0	0
20	2019-01-04	1899-12-31 12:00:00		46	0	0	0	0	0	0	0	0	0	0
21	2019-01-07	1899-12-31 12:00:00		49	0	0	0	0	0	0	0	0	0	0
22	2019-01-09	1899-12-31 12:00:00		51	0	0	0	0	0	0	0	0	0	0
23	2019-01-11	1899-12-31 12:00:00		53	0	0	0	0	0	0	0	0	0	0
24	2019-01-14	1899-12-31 12:00:00		56	0	0	0	0	0	0	0	0	0	0
25	2019-01-16	1899-12-31 12:00:00		58	0	0	1	0	0	0	0	0	0	0
26	2019-01-18	1899-12-31 12:00:00		60	1	0	0	0	0	0	0	0	0	0
27	2019-01-21	1899-12-31 12:00:00		63	0	0	0	0	0	0	0	0	0	0
28	2019-01-23	1899-12-31 12:00:00		65	0	0	0	0	0	0	0	0	0	0
29	2019-01-25	1899-12-31 12:00:00		67	0	0	0	0	0	0	0	0	0	0
30	2019-01-28	1899-12-31 12:00:00		70	0	0	0	0	0	0	0	0	0	0
31	2019-01-30	1899-12-31 12:00:00		72	0	0	0	0	0	0	0	0	0	0
32	2019-02-01	1899-12-31 12:00:00		74	0	0	0	0	0	0	0	0	0	0
33	2019-02-04	1899-12-31 12:00:00		77	0	0	0	0	0	0	0	0	0	0
34	2019-02-06	1899-12-31 12:00:00		79	0	0	0	0	0	0	0	0	0	0
35	2019-02-08	1899-12-31 12:00:00		81	0	0	0	0	0	0	0	0	0	0
36	2019-02-11	1899-12-31 12:00:00		84	0	0	0	0	0	0	0	0	0	0
37	2019-02-13	1899-12-31 12:00:00		86	0	0	0	0	0	0	0	0	0	0
38	2019-02-15	1899-12-31 12:00:00		88	0	0	0	0	0	0	0	0	0	0
39	2019-02-18	1899-12-31 12:00:00		91	0	0	0	0	0	0	0	0	0	0
40	2019-02-20	1899-12-31 12:00:00		93	0	0	0	0	0	0	0	0	0	0
41	2000-02-22	1899-12-31 12:00:00		93	0	0	0	0	0	0	0	0	0	0
42	2000-01-01	1899-12-31 12:00:00		93	0	0	0	0	0	0	0	0	0	0
43	2000-01-01	1899-12-31 12:00:00		93	0	0	0	0	0	0	0	0	0	0
44	2000-01-01	1899-12-31 12:00:00		93	0	0	0	0	0	0	0	0	0	0
45	2000-01-01	1899-12-31 12:00:00		93	0	0	0	0	0	0	0	0	0	0
46	2000-01-01	1899-12-31 12:00:00		93	0	0	0	0	0	0	0	0	0	0
47	2000-01-01	1899-12-31 12:00:00		93	0	0	0	0	0	0	0	0	0	0
48	2000-01-01	1899-12-31 12:00:00		93	0	0	0	0	0	0	0	0	0	0
49	2000-01-01	1899-12-31 12:00:00		93	0	0	0	0	0	0	0	0	0	0
50	2000-01-01	1899-12-31 12:00:00		93	0	0	0	0	0	0	0	0	0	0
51	2000-01-01	1899-12-31 12:00:00		93	0	0	0	0	0	0	0	0	0	0
52	2000-01-01	1899-12-31 12:00:00		93	0	0	0	0	0	0	0	0	0	0
53	2000-01-01	1899-12-31 12:00:00		93	0	0	0	0	0	0	0	0	0	0
54	2000-01-01	1899-12-31 12:00:00		93	0	0	0	0	0	0	0	0	0	0
55	2000-01-01	1899-12-31 12:00:00		93	0	0	0	0	0	0	0	0	0	0
56	2000-01-01	1899-12-31 12:00:00		93	0	0	0	0	0	0	0	0	0	0
57	2000-01-01	1899-12-31 12:00:00		93	0	0	0	0	0	0	0	0	0	0
58	2000-01-01	1899-12-31 12:00:00		93	0	0	0	0	0	0	0	0	0	0
59	2000-01-01	1899-12-31 12:00:00		93	0	0	0	0	0	0	0	0	0	0
60	2000-01-01	1899-12-31 12:00:00		93	0	0	0	0	0	0	0	0	0	0
61	2000-01-01	1899-12-31 12:00:00		93	0	0	0	0	0	0	0	0	0	0
62	2000-01-01	1899-12-31 12:00:00		93	0	0	0	0	0	0	0	0	0	0
63	2000-01-01	1899-12-31 12:00:00		93	0	0	0	0	0	0	0	0	0	0
64	2000-01-01	1899-12-31 12:00:00		93	0	0	0	0	0	0	0	0	0	0
65	2000-01-01	1899-12-31 12:00:00		93	0	0	0	0	0	0	0	0	0	0
66	2000-01-01	1899-12-31 12:00:00		93	0	0	0	0	0	0	0	0	0	0
67	2000-01-01	1899-12-31 12:00:00		93	0	0	0	0	0	0	0	0	0	0
68	2000-01-01	1899-12-31 12:00:00		93	0	0	0	0	0	0	0	0	0	0
69	2000-01-01	1899-12-31 12:00:00		93	0	0	0	0	0	0	0	0	0	0
70	2000-01-01	1899-12-31 12:00:00		93	0	0	0	0	0	0	0	0	0	0
71	2000-01-01	1899-12-31 12:00:00		93	0	0	0	0	0	0	0	0	0	0
72	2000-01-01	1899-12-31 12:00:00		93	0	0	0	0	0	0	0	0	0	0
73	2000-01-01	1899-12-31 12:00:00		93	0	0	0	0	0	0	0	0	0	0
74	2000-01-01	1899-12-31 12:00:00		93	0	0	0	0	0	0	0	0	0	0
75	2000-01-01	1899-12-31 12:00:00		93	0	0	0	0	0	0	0	0	0	0
[truncated: 84 more columns]

## Sheet: egg data
		treatment start date	2018-11-19																				total eggs laid per ave female
																								food	ave of sum egg production for ave female	error		median LS
	date on food
	time on food																							Insulin, uninduced	#DIV/0!	#DIV/0!		71
	date off food																							test1	#DIV/0!	#DIV/0!		71
	time off food																							PBS, uninduced	#DIV/0!	#DIV/0!		71
	day		-43423		-43423		-43423		-43423		-43423		-43423		-43423		-43423		-43423		-43423			PBS, Induced	#DIV/0!	#DIV/0!		19.5
	time on food (h)		0		0		0		0		0		0		0		0		0		0			Insulin, Induced	#DIV/0!	#DIV/0!		24
	fraction of 24h		0		0		0		0		0		0		0		0		0		0			test 2	#DIV/0!	#DIV/0!		57
		flies in		flies in		flies in		flies in		flies in		flies in		flies in		flies in		flies in		flies in				condition g	#DIV/0!	#DIV/0!		0
Insulin, uninduced		vial		vial		vial		vial		vial		vial		vial		vial		vial		vial				condition h	#DIV/0!	#DIV/0!		0
	1	#N/A		#N/A		#N/A		#N/A		#N/A		#N/A		#N/A		#N/A		#N/A		#N/A				condition i	#DIV/0!	#DIV/0!		0
	2	#N/A		#N/A		#N/A		#N/A		#N/A		#N/A		#N/A		#N/A		#N/A		#N/A				condition j	#DIV/0!	#DIV/0!		0
	3	#N/A		#N/A		#N/A		#N/A		#N/A		#N/A		#N/A		#N/A		#N/A		#N/A
	4	#N/A		#N/A		#N/A		#N/A		#N/A		#N/A		#N/A		#N/A		#N/A		#N/A
	5	#N/A		#N/A		#N/A		#N/A		#N/A		#N/A		#N/A		#N/A		#N/A		#N/A
	6	#N/A		#N/A		#N/A		#N/A		#N/A		#N/A		#N/A		#N/A		#N/A		#N/A
	7	#N/A		#N/A		#N/A		#N/A		#N/A		#N/A		#N/A		#N/A		#N/A		#N/A
	8	#N/A		#N/A		#N/A		#N/A		#N/A		#N/A		#N/A		#N/A		#N/A		#N/A
	9	#N/A		#N/A		#N/A		#N/A		#N/A		#N/A		#N/A		#N/A		#N/A		#N/A
	10	#N/A		#N/A		#N/A		#N/A		#N/A		#N/A		#N/A		#N/A		#N/A		#N/A
eggs per 24 h per female
			#DIV/0!																			sum	#DIV/0!
			#DIV/0!																				#DIV/0!
			#DIV/0!																				#DIV/0!
			#DIV/0!																				#DIV/0!
			#DIV/0!																				#DIV/0!
			#DIV/0!																				#DIV/0!
			#DIV/0!																				#DIV/0!
			#DIV/0!																				#DIV/0!
			#DIV/0!																				#DIV/0!
			#DIV/0!																				#DIV/0!
	average		#DIV/0!																			ave	#DIV/0!
	sd		#DIV/0!																			n	0
	n		0																			sd	#DIV/0!
	se		#DIV/0!																			error	#DIV/0!
test1
	21	#N/A		#N/A		#N/A		#N/A		#N/A		#N/A		#N/A		#N/A		#N/A		#N/A
	22	#N/A		#N/A		#N/A		#N/A		#N/A		#N/A		#N/A		#N/A		#N/A		#N/A
	23	#N/A		#N/A		#N/A		#N/A		#N/A		#N/A		#N/A		#N/A		#N/A		#N/A
	24	#N/A		#N/A		#N/A		#N/A		#N/A		#N/A		#N/A		#N/A		#N/A		#N/A
	25	#N/A		#N/A		#N/A		#N/A		#N/A		#N/A		#N/A		#N/A		#N/A		#N/A
	26	#N/A		#N/A		#N/A		#N/A		#N/A		#N/A		#N/A		#N/A		#N/A		#N/A
	27	#N/A		#N/A		#N/A		#N/A		#N/A		#N/A		#N/A		#N/A		#N/A		#N/A
	28	#N/A		#N/A		#N/A		#N/A		#N/A		#N/A		#N/A		#N/A		#N/A		#N/A
	29	#N/A		#N/A		#N/A		#N/A		#N/A		#N/A		#N/A		#N/A		#N/A		#N/A
	30	#N/A		#N/A		#N/A		#N/A		#N/A		#N/A		#N/A		#N/A		#N/A		#N/A
eggs per 24 h per female
			#DIV/0!																			sum	#DIV/0!
			#DIV/0!																				#DIV/0!
			#DIV/0!																				#DIV/0!
			#DIV/0!																				#DIV/0!
			#DIV/0!																				#DIV/0!
			#DIV/0!																				#DIV/0!
			#DIV/0!																				#DIV/0!
			#DIV/0!																				#DIV/0!
			#DIV/0!																				#DIV/0!
			#DIV/0!																				#DIV/0!
	average		#DIV/0!																			ave	#DIV/0!
	sd		#DIV/0!																			n	0
	n		0																			sd	#DIV/0!
	se		#DIV/0!																			error	#DIV/0!
PBS, uninduced
	41	#N/A		#N/A		#N/A		#N/A		#N/A		#N/A		#N/A		#N/A		#N/A		#N/A
	42	#N/A		#N/A		#N/A		#N/A		#N/A		#N/A		#N/A		#N/A		#N/A		#N/A
	43	#N/A		#N/A		#N/A		#N/A		#N/A		#N/A		#N/A		#N/A		#N/A		#N/A
	44	#N/A		#N/A		#N/A		#N/A		#N/A		#N/A		#N/A		#N/A		#N/A		#N/A
	45	#N/A		#N/A		#N/A		#N/A		#N/A		#N/A		#N/A		#N/A		#N/A		#N/A
	46	#N/A		#N/A		#N/A		#N/A		#N/A		#N/A		#N/A		#N/A		#N/A		#N/A
	47	#N/A		#N/A		#N/A		#N/A		#N/A		#N/A		#N/A		#N/A		#N/A		#N/A
	48	#N/A		#N/A		#N/A		#N/A		#N/A		#N/A		#N/A		#N/A		#N/A		#N/A
	49	#N/A		#N/A		#N/A		#N/A		#N/A		#N/A		#N/A		#N/A		#N/A		#N/A
	50	#N/A		#N/A		#N/A		#N/A		#N/A		#N/A		#N/A		#N/A		#N/A		#N/A
eggs per 24 h per female
			#DIV/0!																			sum	#DIV/0!
			#DIV/0!																				#DIV/0!
			#DIV/0!																				#DIV/0!
			#DIV/0!																				#DIV/0!
			#DIV/0!																				#DIV/0!
			#DIV/0!																				#DIV/0!
			#DIV/0!																				#DIV/0!
			#DIV/0!																				#DIV/0!
			#DIV/0!																				#DIV/0!
			#DIV/0!																				#DIV/0!
	average		#DIV/0!																			ave	#DIV/0!
	sd		#DIV/0!																			n	0
	n		0																			sd	#DIV/0!
	se		#DIV/0!																			error	#DIV/0!
PBS, Induced
	61	#N/A		#N/A		#N/A		#N/A		#N/A		#N/A		#N/A		#N/A		#N/A		#N/A
	62	#N/A		#N/A		#N/A		#N/A		#N/A		#N/A		#N/A		#N/A		#N/A		#N/A
	63	#N/A		#N/A		#N/A		#N/A		#N/A		#N/A		#N/A		#N/A		#N/A		#N/A
	64	#N/A		#N/A		#N/A		#N/A		#N/A		#N/A		#N/A		#N/A		#N/A		#N/A
	65	#N/A		#N/A		#N/A		#N/A		#N/A		#N/A		#N/A		#N/A		#N/A		#N/A
	66	#N/A		#N/A		#N/A		#N/A		#N/A		#N/A		#N/A		#N/A		#N/A		#N/A
	67	#N/A		#N/A		#N/A		#N/A		#N/A		#N/A		#N/A		#N/A		#N/A		#N/A
	68	#N/A		#N/A		#N/A		#N/A		#N/A		#N/A		#N/A		#N/A		#N/A		#N/A
	69	#N/A		#N/A		#N/A		#N/A		#N/A		#N/A		#N/A		#N/A		#N/A		#N/A
	70	#N/A		#N/A		#N/A		#N/A		#N/A		#N/A		#N/A		#N/A		#N/A		#N/A
eggs per 24 h per female
			#DIV/0!																			sum	#DIV/0!
			#DIV/0!																				#DIV/0!
			#DIV/0!																				#DIV/0!
			#DIV/0!																				#DIV/0!
			#DIV/0!																				#DIV/0!
			#DIV/0!																				#DIV/0!
			#DIV/0!																				#DIV/0!
			#DIV/0!																				#DIV/0!
			#DIV/0!																				#DIV/0!
			#DIV/0!																				#DIV/0!
	average		#DIV/0!																			ave	#DIV/0!
	sd		#DIV/0!																			n	0
	n		0																			sd	#DIV/0!
	se		#DIV/0!																			error	#DIV/0!
Insulin, Induced
	81	#N/A		#N/A		#N/A		#N/A		#N/A		#N/A		#N/A		#N/A		#N/A		#N/A
	82	#N/A		#N/A		#N/A		#N/A		#N/A		#N/A		#N/A		#N/A		#N/A		#N/A
	83	#N/A		#N/A		#N/A		#N/A		#N/A		#N/A		#N/A		#N/A		#N/A		#N/A
	84	#N/A		#N/A		#N/A		#N/A		#N/A		#N/A		#N/A		#N/A		#N/A		#N/A
	85	#N/A		#N/A		#N/A		#N/A		#N/A		#N/A		#N/A		#N/A		#N/A		#N/A
	86	#N/A		#N/A		#N/A		#N/A		#N/A		#N/A		#N/A		#N/A		#N/A		#N/A
	87	#N/A		#N/A		#N/A		#N/A		#N/A		#N/A		#N/A		#N/A		#N/A		#N/A
	88	#N/A		#N/A		#N/A		#N/A		#N/A		#N/A		#N/A		#N/A		#N/A		#N/A
	89	#N/A		#N/A		#N/A		#N/A		#N/A		#N/A		#N/A		#N/A		#N/A		#N/A
	90	#N/A		#N/A		#N/A		#N/A		#N/A		#N/A		#N/A		#N/A		#N/A		#N/A
eggs per 24 h per female
			#DIV/0!																			sum	#DIV/0!
			#DIV/0!																				#DIV/0!
			#DIV/0!																				#DIV/0!
			#DIV/0!																				#DIV/0!
			#DIV/0!																				#DIV/0!
			#DIV/0!																				#DIV/0!
			#DIV/0!																				#DIV/0!
			#DIV/0!																				#DIV/0!
			#DIV/0!																				#DIV/0!
			#DIV/0!																				#DIV/0!
	average		#DIV/0!																			ave	#DIV/0!
	sd		#DIV/0!																			n	0
	n		0																			sd	#DIV/0!
	se		#DIV/0!																			error	#DIV/0!
test 2
	101	#N/A		#N/A		#N/A		#N/A		#N/A		#N/A		#N/A		#N/A		#N/A		#N/A
	102	#N/A		#N/A		#N/A		#N/A		#N/A		#N/A		#N/A		#N/A		#N/A		#N/A
	103	#N/A		#N/A		#N/A		#N/A		#N/A		#N/A		#N/A		#N/A		#N/A		#N/A
	104	#N/A		#N/A		#N/A		#N/A		#N/A		#N/A		#N/A		#N/A		#N/A		#N/A
	105	#N/A		#N/A		#N/A		#N/A		#N/A		#N/A		#N/A		#N/A		#N/A		#N/A
	106	#N/A		#N/A		#N/A		#N/A		#N/A		#N/A		#N/A		#N/A		#N/A		#N/A
	107	#N/A		#N/A		#N/A		#N/A		#N/A		#N/A		#N/A		#N/A		#N/A		#N/A
	108	#N/A		#N/A		#N/A		#N/A		#N/A		#N/A		#N/A		#N/A		#N/A		#N/A
	109	#N/A		#N/A		#N/A		#N/A		#N/A		#N/A		#N/A		#N/A		#N/A		#N/A
	110	#N/A		#N/A		#N/A		#N/A		#N/A		#N/A		#N/A		#N/A		#N/A		#N/A
eggs per 24 h per female
			#DIV/0!																			sum	#DIV/0!
			#DIV/0!																				#DIV/0!
			#DIV/0!																				#DIV/0!
			#DIV/0!																				#DIV/0!
			#DIV/0!																				#DIV/0!
			#DIV/0!																				#DIV/0!
			#DIV/0!																				#DIV/0!
			#DIV/0!																				#DIV/0!
			#DIV/0!																				#DIV/0!
			#DIV/0!																				#DIV/0!
	average		#DIV/0!																			ave	#DIV/0!
	sd		#DIV/0!																			n	0
	n		0																			sd	#DIV/0!
	se		#DIV/0!																			error	#DIV/0!
condition g
	121	#N/A		#N/A		#N/A		#N/A		#N/A		#N/A		#N/A		#N/A		#N/A		#N/A
	122	#N/A		#N/A		#N/A		#N/A		#N/A		#N/A		#N/A		#N/A		#N/A		#N/A
	123	#N/A		#N/A		#N/A		#N/A		#N/A		#N/A		#N/A		#N/A		#N/A		#N/A
	124	#N/A		#N/A		#N/A		#N/A		#N/A		#N/A		#N/A		#N/A		#N/A		#N/A
	125	#N/A		#N/A		#N/A		#N/A		#N/A		#N/A		#N/A		#N/A		#N/A		#N/A
	126	#N/A		#N/A		#N/A		#N/A		#N/A		#N/A		#N/A		#N/A		#N/A		#N/A
	127	#N/A		#N/A		#N/A		#N/A		#N/A		#N/A		#N/A		#N/A		#N/A		#N/A
	128	#N/A		#N/A		#N/A		#N/A		#N/A		#N/A		#N/A		#N/A		#N/A		#N/A
	129	#N/A		#N/A		#N/A		#N/A		#N/A		#N/A		#N/A		#N/A		#N/A		#N/A
	130	#N/A		#N/A		#N/A		#N/A		#N/A		#N/A		#N/A		#N/A		#N/A		#N/A
eggs per 24 h per female
			#DIV/0!																			sum	#DIV/0!
			#DIV/0!																				#DIV/0!
			#DIV/0!																				#DIV/0!
			#DIV/0!																				#DIV/0!
			#DIV/0!																				#DIV/0!
			#DIV/0!																				#DIV/0!
			#DIV/0!																				#DIV/0!
			#DIV/0!																				#DIV/0!
			#DIV/0!																				#DIV/0!
			#DIV/0!																				#DIV/0!
	average		#DIV/0!																			ave	#DIV/0!
	sd		#DIV/0!																			n	0
	n		0																			sd	#DIV/0!
	se		#DIV/0!																			error	#DIV/0!
condition h
	141	#N/A		#N/A		#N/A		#N/A		#N/A		#N/A		#N/A		#N/A		#N/A		#N/A
	142	#N/A		#N/A		#N/A		#N/A		#N/A		#N/A		#N/A		#N/A		#N/A		#N/A
	143	#N/A		#N/A		#N/A		#N/A		#N/A		#N/A		#N/A		#N/A		#N/A		#N/A
	144	#N/A		#N/A		#N/A		#N/A		#N/A		#N/A		#N/A		#N/A		#N/A		#N/A
	145	#N/A		#N/A		#N/A		#N/A		#N/A		#N/A		#N/A		#N/A		#N/A		#N/A
	146	#N/A		#N/A		#N/A		#N/A		#N/A		#N/A		#N/A		#N/A		#N/A		#N/A
	147	#N/A		#N/A		#N/A		#N/A		#N/A		#N/A		#N/A		#N/A		#N/A		#N/A
	148	#N/A		#N/A		#N/A		#N/A		#N/A		#N/A		#N/A		#N/A		#N/A		#N/A
	149	#N/A		#N/A		#N/A		#N/A		#N/A		#N/A		#N/A		#N/A		#N/A		#N/A
	150	#N/A		#N/A		#N/A		#N/A		#N/A		#N/A		#N/A		#N/A		#N/A		#N/A
eggs per 24 h per female
			#DIV/0!																			sum	#DIV/0!
			#DIV/0!																				#DIV/0!
			#DIV/0!																				#DIV/0!
			#DIV/0!																				#DIV/0!
			#DIV/0!																				#DIV/0!
			#DIV/0!																				#DIV/0!
			#DIV/0!																				#DIV/0!
			#DIV/0!																				#DIV/0!
			#DIV/0!																				#DIV/0!
			#DIV/0!																				#DIV/0!
	average		#DIV/0!																			ave	#DIV/0!
	sd		#DIV/0!																			n	0
	n		0																			sd	#DIV/0!
	se		#DIV/0!																			error	#DIV/0!
condition i
	161	#N/A		#N/A		#N/A		#N/A		#N/A		#N/A		#N/A		#N/A		#N/A		#N/A
	162	#N/A		#N/A		#N/A		#N/A		#N/A		#N/A		#N/A		#N/A		#N/A		#N/A
	163	#N/A		#N/A		#N/A		#N/A		#N/A		#N/A		#N/A		#N/A		#N/A		#N/A
	164	#N/A		#N/A		#N/A		#N/A		#N/A		#N/A		#N/A		#N/A		#N/A		#N/A
	165	#N/A		#N/A		#N/A		#N/A		#N/A		#N/A		#N/A		#N/A		#N/A		#N/A
	166	#N/A		#N/A		#N/A		#N/A		#N/A		#N/A		#N/A		#N/A		#N/A		#N/A
	167	#N/A		#N/A		#N/A		#N/A		#N/A		#N/A		#N/A		#N/A		#N/A		#N/A
	168	#N/A		#N/A		#N/A		#N/A		#N/A		#N/A		#N/A		#N/A		#N/A		#N/A
	169	#N/A		#N/A		#N/A		#N/A		#N/A		#N/A		#N/A		#N/A		#N/A		#N/A
	170	#N/A		#N/A		#N/A		#N/A		#N/A		#N/A		#N/A		#N/A		#N/A		#N/A
eggs per 24 h per female
			#DIV/0!																			sum	#DIV/0!
			#DIV/0!																				#DIV/0!
			#DIV/0!																				#DIV/0!
			#DIV/0!																				#DIV/0!
			#DIV/0!																				#DIV/0!
			#DIV/0!																				#DIV/0!
			#DIV/0!																				#DIV/0!
			#DIV/0!																				#DIV/0!
			#DIV/0!																				#DIV/0!
			#DIV/0!																				#DIV/0!
	average		#DIV/0!																			ave	#DIV/0!
	sd		#DIV/0!																			n	0
	n		0																			sd	#DIV/0!
	se		#DIV/0!																			error	#DIV/0!
condition j
	181	#N/A		#N/A		#N/A		#N/A		#N/A		#N/A		#N/A		#N/A		#N/A		#N/A
	182	#N/A		#N/A		#N/A		#N/A		#N/A		#N/A		#N/A		#N/A		#N/A		#N/A
	183	#N/A		#N/A		#N/A		#N/A		#N/A		#N/A		#N/A		#N/A		#N/A		#N/A
	184	#N/A		#N/A		#N/A		#N/A		#N/A		#N/A		#N/A		#N/A		#N/A		#N/A
	185	#N/A		#N/A		#N/A		#N/A		#N/A		#N/A		#N/A		#N/A		#N/A		#N/A
	186	#N/A		#N/A		#N/A		#N/A		#N/A		#N/A		#N/A		#N/A		#N/A		#N/A
	187	#N/A		#N/A		#N/A		#N/A		#N/A		#N/A		#N/A		#N/A		#N/A		#N/A
	188	#N/A		#N/A		#N/A		#N/A		#N/A		#N/A		#N/A		#N/A		#N/A		#N/A
	189	#N/A		#N/A		#N/A		#N/A		#N/A		#N/A		#N/A		#N/A		#N/A		#N/A
	190	#N/A		#N/A		#N/A		#N/A		#N/A		#N/A		#N/A		#N/A		#N/A		#N/A
eggs per 24 h per female
			#DIV/0!																			sum	#DIV/0!
			#DIV/0!																				#DIV/0!
			#DIV/0!																				#DIV/0!
			#DIV/0!																				#DIV/0!
			#DIV/0!																				#DIV/0!
			#DIV/0!																				#DIV/0!
			#DIV/0!																				#DIV/0!
			#DIV/0!																				#DIV/0!
			#DIV/0!																				#DIV/0!
			#DIV/0!																				#DIV/0!
	average		#DIV/0!																			ave	#DIV/0!
	sd		#DIV/0!																			n	0
	n		0																			sd	#DIV/0!
	se		#DIV/0!																			error	#DIV/0!

## Sheet: popn per bottle
EXPERIMENT	expt name here
CONDITION	Insulin, uninduced						sum deaths		106			censored		2								CONDITION	test 2						sum deaths		96			censored		4
	1	2	3	4	5	6	7	8	9	10	11	12	13	14	15	16	17	18	19	20			101	102	103	104	105	106	107	108	109	110	111	112	113	114	115	116	117	118	119	120
dead	16	14	18	14	12	16	16	0	0	0	0	0	0	0	0	0	0	0	0	0		dead	14	14	13	10	17	13	15	0	0	0	0	0	0	0	0	0	0	0	0	0
censored	0	0	1	0	1	0	0	0	0	0	0	0	0	0	0	0	0	0	0	0		censored	1	0	1	1	0	1	0	0	0	0	0	0	0	0	0	0	0	0	0	0
remaining per bottle	-1	1	-4	1	2	-1	-1	15	15	15	15	15	15	15	15	15	15	15	15	15		remaining per bottle	0	1	1	4	-2	1	0	15	15	15	15	15	15	15	15	15	15	15	15	15
CONDITION	test1						sum deaths		108			censored		0								CONDITION	condition g						sum deaths		0			censored		0
	21	22	23	24	25	26	27	28	29	30	31	32	33	34	35	36	37	38	39	40			121	122	123	124	125	126	127	128	129	130	131	132	133	134	135	136	137	138	139	140
dead	20	12	16	15	15	15	15	0	0	0	0	0	0	0	0	0	0	0	0	0		dead	0	0	0	0	0	0	0	0	0	0	0	0	0	0	0	0	0	0	0	0
censored	0	0	0	0	0	0	0	0	0	0	0	0	0	0	0	0	0	0	0	0		censored	0	0	0	0	0	0	0	0	0	0	0	0	0	0	0	0	0	0	0	0
remaining per bottle	-5	3	-1	0	0	0	0	15	15	15	15	15	15	15	15	15	15	15	15	15		remaining per bottle	10	10	10	10	10	10	10	10	10	10	10	10	10	10	10	10	10	10	10	10
CONDITION	PBS, uninduced						sum deaths		112			censored		3								CONDITION	condition h						sum deaths		0			censored		0
	41	42	43	44	45	46	47	48	49	50	51	52	53	54	55	56	57	58	59	60			141	142	143	144	145	146	147	148	149	150	151	152	153	154	155	156	157	158	159	160
dead	14	15	15	17	14	13	11	13	0	0	0	0	0	0	0	0	0	0	0	0		dead	0	0	0	0	0	0	0	0	0	0	0	0	0	0	0	0	0	0	0	0
censored	0	0	0	0	2	0	0	1	0	0	0	0	0	0	0	0	0	0	0	0		censored	0	0	0	0	0	0	0	0	0	0	0	0	0	0	0	0	0	0	0	0
remaining per bottle	1	0	0	-2	-1	2	4	1	15	15	15	15	15	15	15	15	15	15	15	15		remaining per bottle	10	10	10	10	10	10	10	10	10	10	10	10	10	10	10	10	10	10	10	10
CONDITION	PBS, Induced						sum deaths		121			censored		5								CONDITION	condition i						sum deaths		0			censored		0
	61	62	63	64	65	66	67	68	69	70	71	72	73	74	75	76	77	78	79	80			161	162	163	164	165	166	167	168	169	170	171	172	173	174	175	176	177	178	179	180
dead	13	19	17	17	14	10	16	15	0	0	0	0	0	0	0	0	0	0	0	0		dead	0	0	0	0	0	0	0	0	0	0	0	0	0	0	0	0	0	0	0	0
censored	1	0	0	0	0	2	0	2	0	0	0	0	0	0	0	0	0	0	0	0		censored	0	0	0	0	0	0	0	0	0	0	0	0	0	0	0	0	0	0	0	0
remaining per bottle	1	-4	-2	-2	1	3	-1	-2	15	15	15	15	15	15	15	15	15	15	15	15		remaining per bottle	10	10	10	10	10	10	10	10	10	10	10	10	10	10	10	10	10	10	10	10
CONDITION	Insulin, Induced						sum deaths		116			censored		2								CONDITION	condition j						sum deaths		0			censored		0
	81	82	83	84	85	86	87	88	89	90	91	92	93	94	95	96	97	98	99	100			181	182	183	184	185	186	187	188	189	190	191	192	193	194	195	196	197	198	199	200
dead	11	15	15	17	16	12	16	14	0	0	0	0	0	0	0	0	0	0	0	0		dead	0	0	0	0	0	0	0	0	0	0	0	0	0	0	0	0	0	0	0	0
censored	0	1	0	0	0	0	1	0	0	0	0	0	0	0	0	0	0	0	0	0		censored	0	0	0	0	0	0	0	0	0	0	0	0	0	0	0	0	0	0	0	0
remaining per bottle	4	-1	0	-2	-1	3	-2	1	15	15	15	15	15	15	15	15	15	15	15	15		remaining per bottle	10	10	10	10	10	10	10	10	10	10	10	10	10	10	10	10	10	10	10	10

## Sheet: sheet(1)
EXPERIMENT	Infection death bacterial cells
DAY	3
DATE	2018-11-22						time		1899-12-31 12:00:00
CONDITION	ElavGS x W1118 PBS RU+						sum deaths		0			censored		1								CONDITION	36R x dead cells RU-						sum deaths		0			censored		2
	1	2	3	4	5	6	7	8	9	10	11	12	13	14	15	16	17	18	19	20			101	102	103	104	105	106	107	108	109	110	111	112	113	114	115	116	117	118	119	120
dead																						dead
carried over																						carried over
censored			1																			censored	1					1
CONDITION	ElavGS x W1118 dead cells RU+						sum deaths		0			censored		0								CONDITION	condition g						sum deaths		0			censored		0
	21	22	23	24	25	26	27	28	29	30	31	32	33	34	35	36	37	38	39	40			121	122	123	124	125	126	127	128	129	130	131	132	133	134	135	136	137	138	139	140
dead																						dead
carried over																						carried over
censored																						censored
CONDITION	ElavGS x W1118 dead cells RU-						sum deaths		0			censored		1								CONDITION	condition h						sum deaths		0			censored		0
	41	42	43	44	45	46	47	48	49	50	51	52	53	54	55	56	57	58	59	60			141	142	143	144	145	146	147	148	149	150	151	152	153	154	155	156	157	158	159	160
dead																						dead
carried over																						carried over
censored					1																	censored
CONDITION	36R x W1118 PBS RU+						sum deaths		0			censored		5								CONDITION	condition i						sum deaths		0			censored		0
	61	62	63	64	65	66	67	68	69	70	71	72	73	74	75	76	77	78	79	80			161	162	163	164	165	166	167	168	169	170	171	172	173	174	175	176	177	178	179	180
dead																						dead
carried over																						carried over
censored	1					2		2														censored
CONDITION	36R x dead cells RU+						sum deaths		0			censored		1								CONDITION	condition j						sum deaths		0			censored		0
	81	82	83	84	85	86	87	88	89	90	91	92	93	94	95	96	97	98	99	100			181	182	183	184	185	186	187	188	189	190	191	192	193	194	195	196	197	198	199	200
dead																						dead
carried over																						carried over
censored							1															censored

[truncated: 74 more sheets: sheet(2), sheet(3), sheet(4), sheet(5), sheet(6), sheet(7), sheet(8), sheet(9), sheet(10), sheet(11), sheet(12), sheet(13), sheet (14), sheet (15), sheet (16), sheet (17), sheet (18), sheet (19), sheet (20), sheet (21) …]
