# Supplementary figures and images for: Enhanced insulin signalling ameliorates C9orf72 hexanucleotide repeat expansion toxicity in Drosophila
Source: eLife journal article supplement (doi:10.7554/elife.58565), 2021-03-19

A

## GR100\_vs\_ctrl

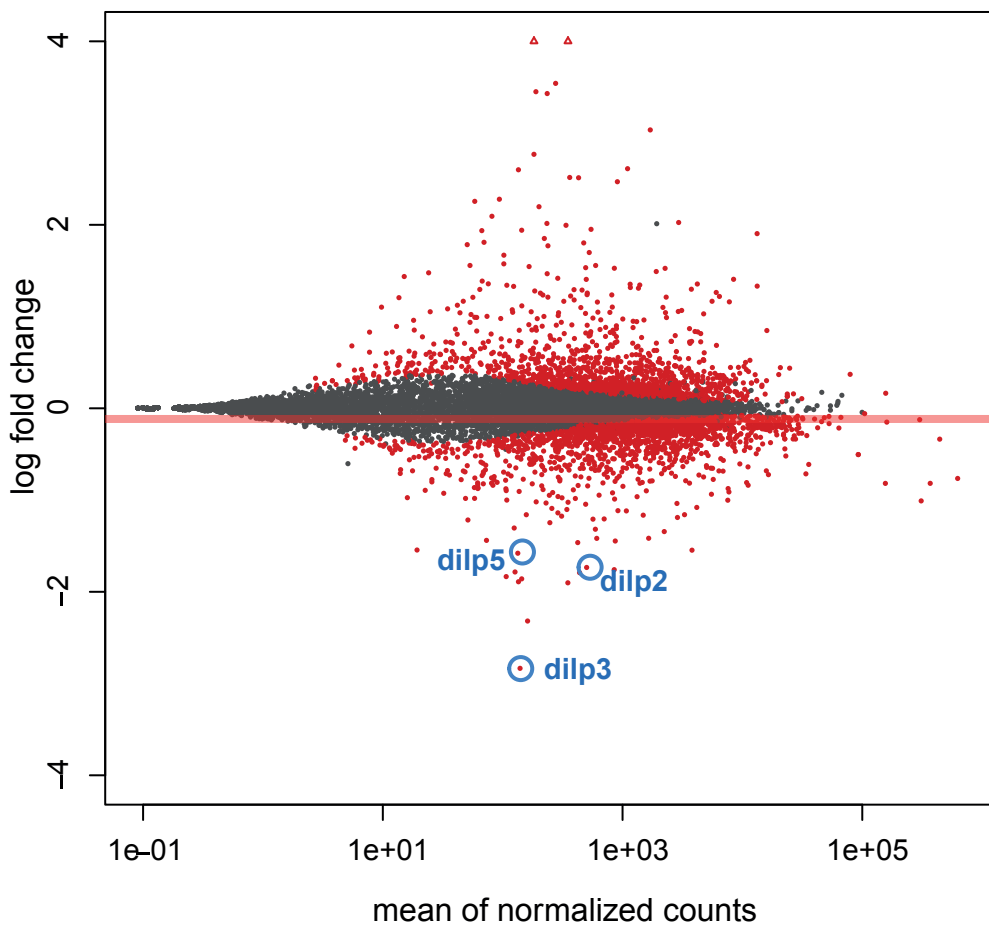

B

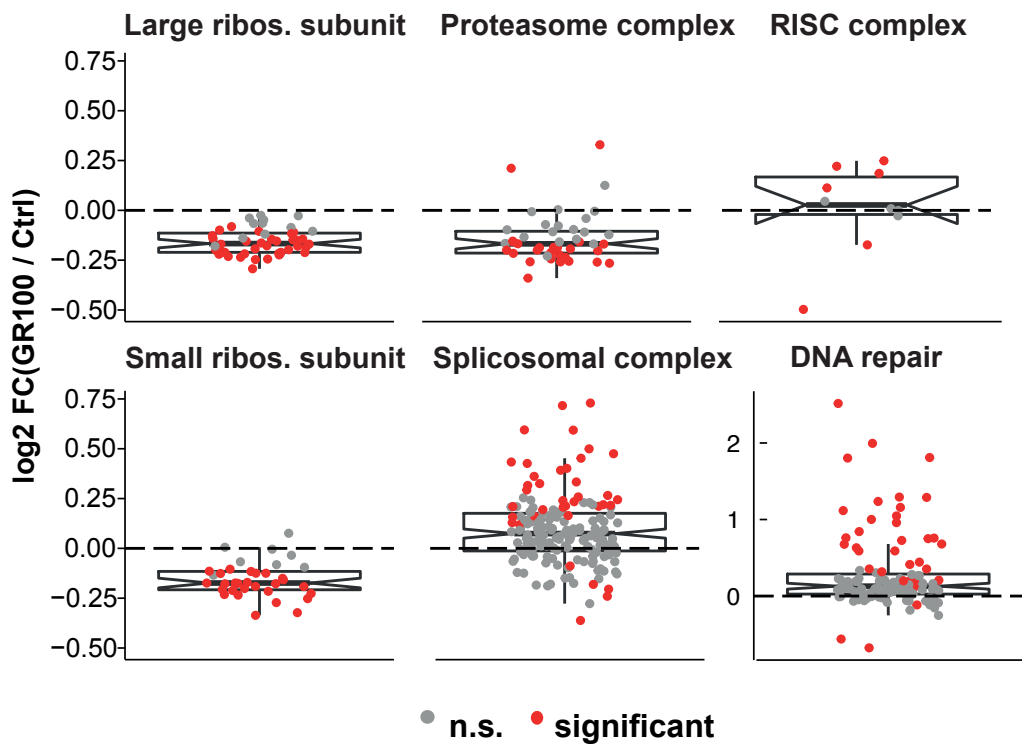

Supplement: supp [file elife-58565-supp-v1.zip › elife_poa_e58565_Figure_1_figure_supplement_1.pdf]

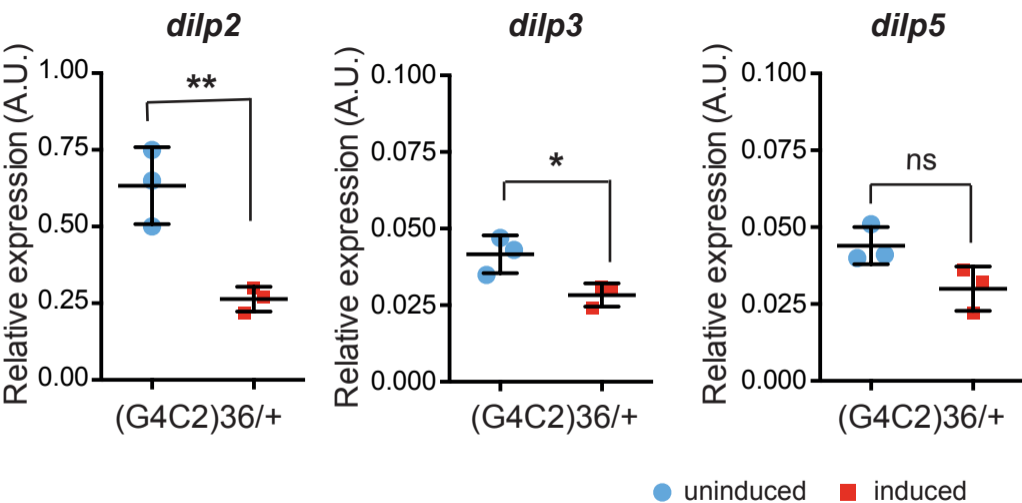

Supplement: supp [file elife-58565-supp-v1.zip › elife_poa_e58565_Figure_1_figure_supplement_2.pdf]

**A**

ElavGS&gt;GR100, Non-induced

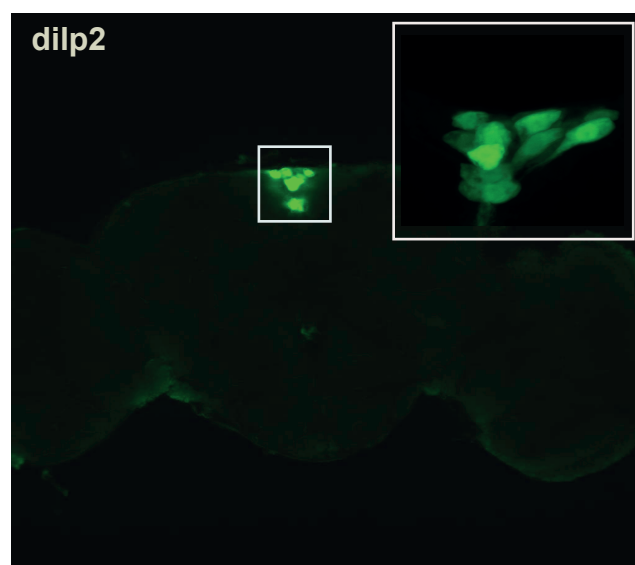

ElavGS&gt;GR100, Induced

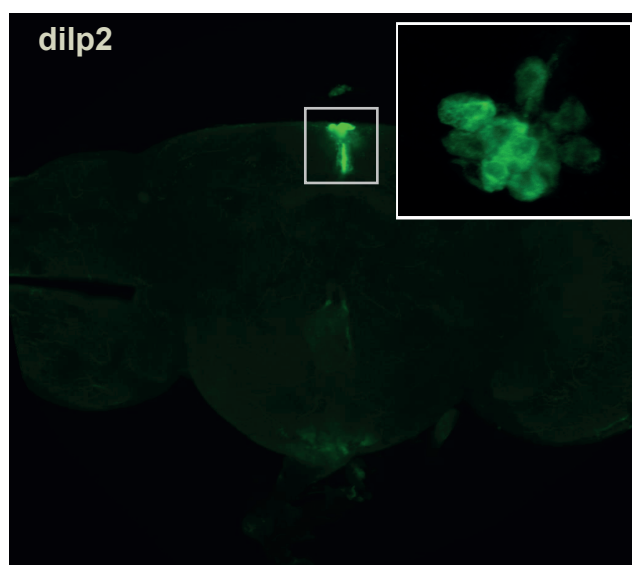**B**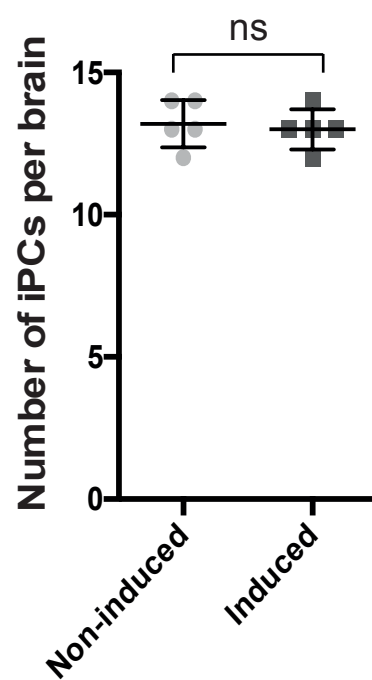**C**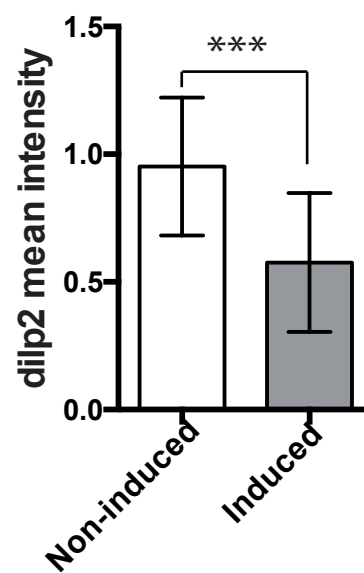**D**

dilp3Gal4&gt;mcd8GFP

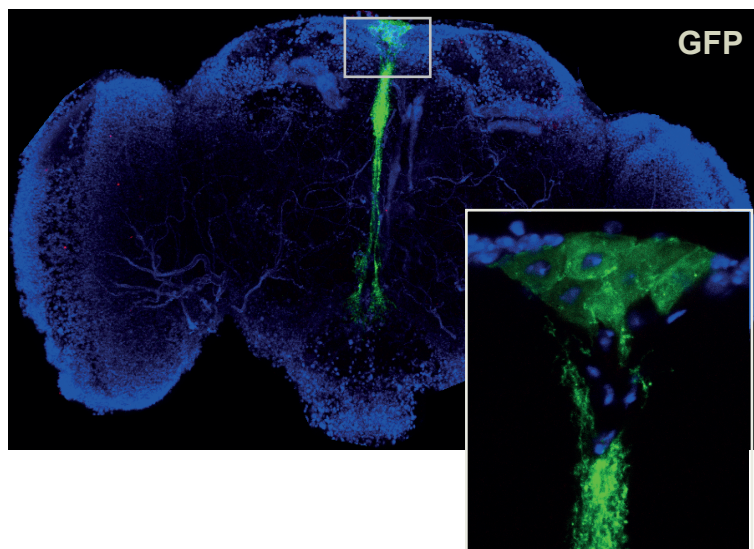

dilp3Gal4&gt;GR100

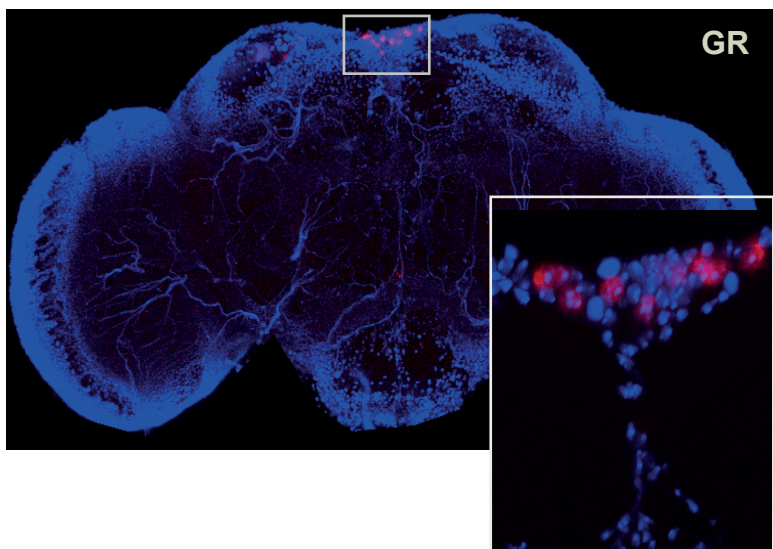

Supplement: supp [file elife-58565-supp-v1.zip › elife_poa_e58565_Figure_1_figure_supplement_3.pdf]

**A**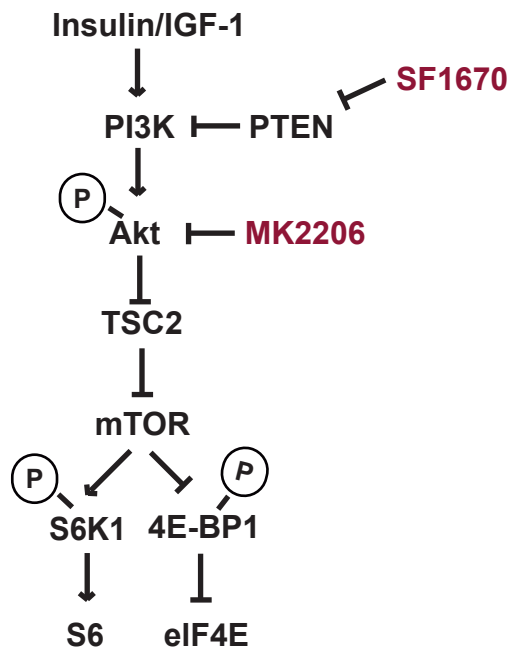

mRNA translation, cell growth and survival

**B**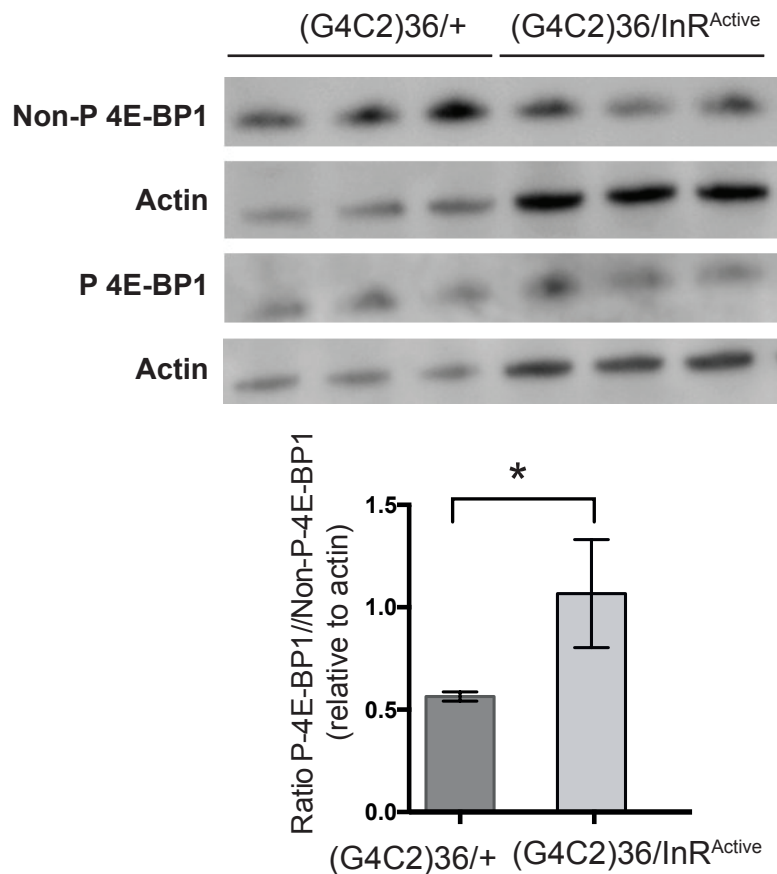

Supplement: supp [file elife-58565-supp-v1.zip › elife_poa_e58565_Figure_1_figure_supplement_4.pdf]

**A**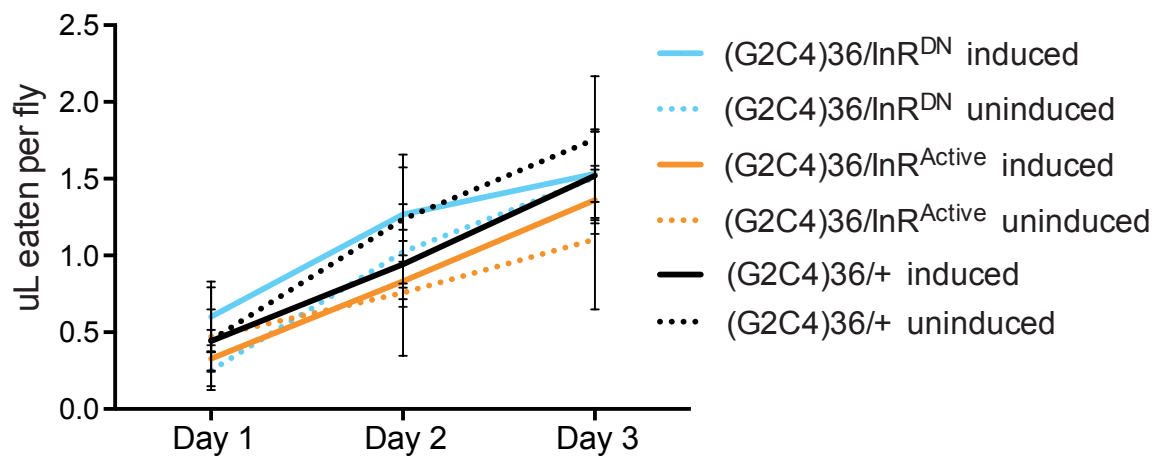**B**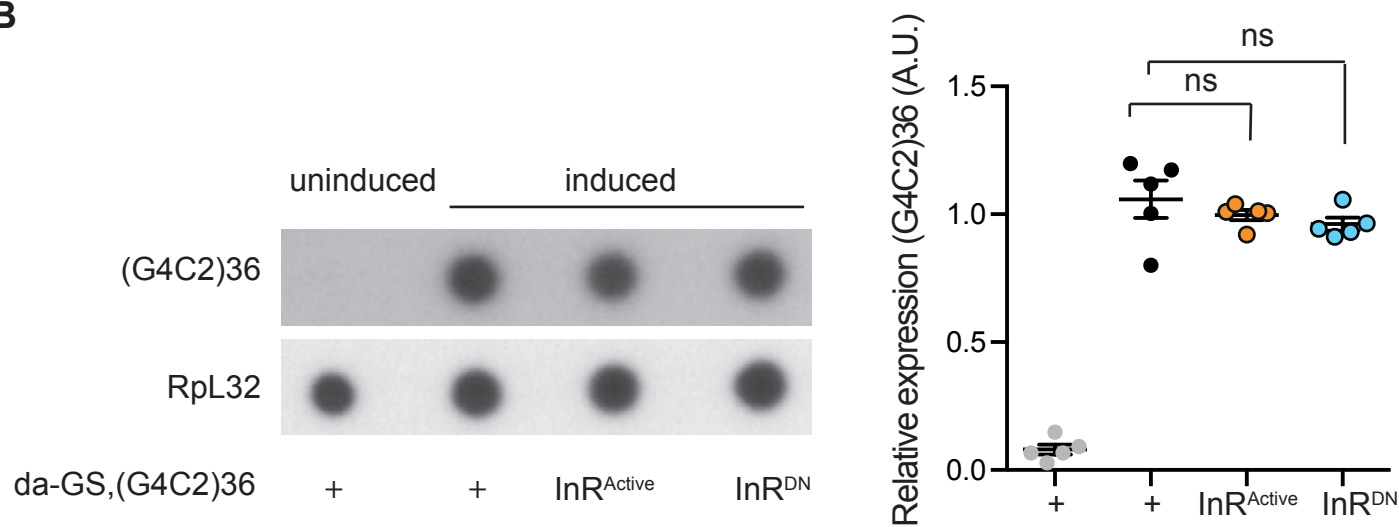**C**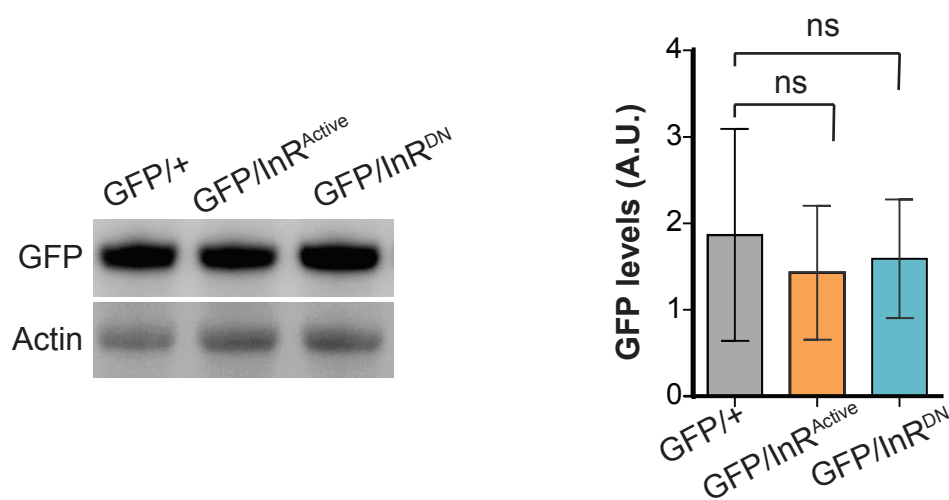**D**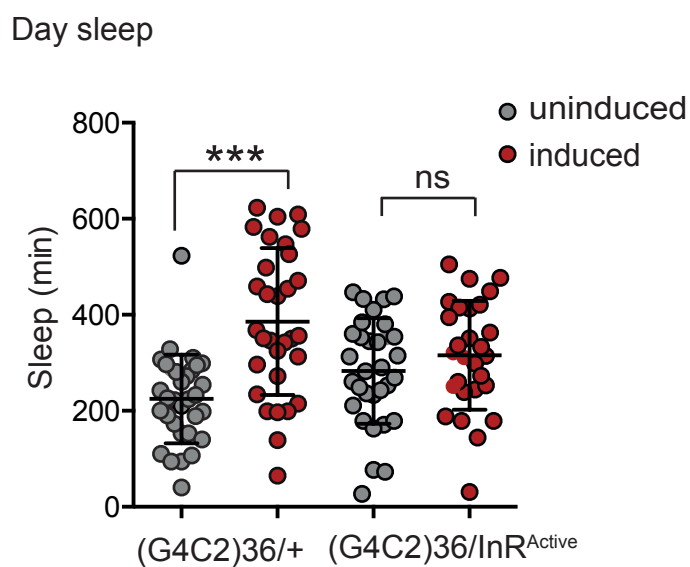**E**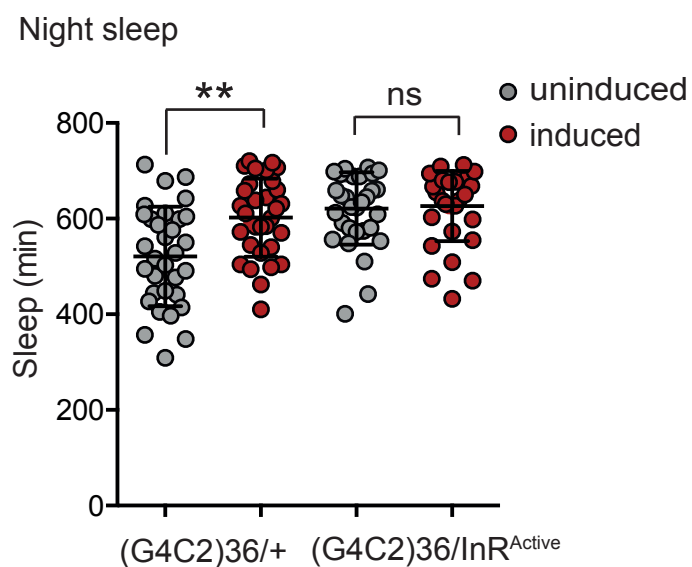

Supplement: supp [file elife-58565-supp-v1.zip › elife_poa_e58565_Figure_2_figure_supplement_1.pdf]

**A**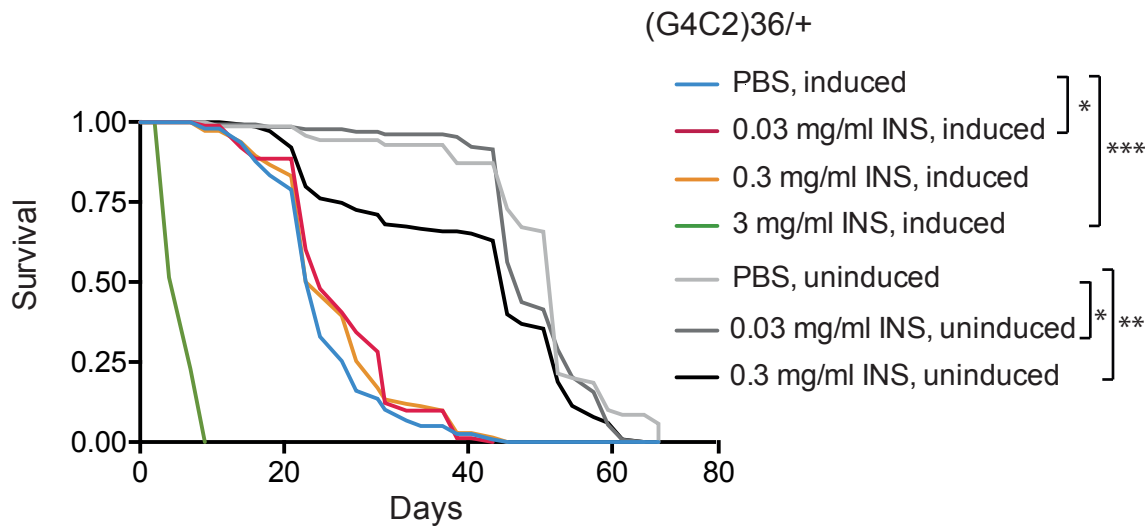**B**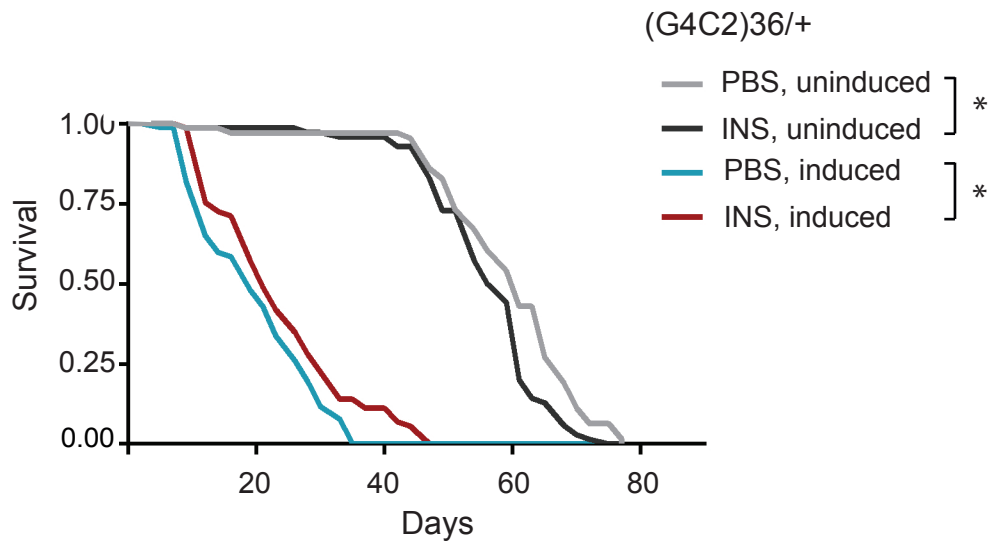

Supplement: supp [file elife-58565-supp-v1.zip › elife_poa_e58565_Figure_6_figure_supplement_1.pdf]
